# Supplementary material for: Enantioselective synthesis of unsymmetrical α,α-diarylacetates via organocatalyzed formal C–H insertion reactions of sulfoxonium ylides with indoles and pyrroles
Source: Royal Society of Chemistry journal article supplement (doi:10.1039/d4qo00753k), 2024-01-01

Supplementary Information

**Enantioselective Synthesis of Unsymmetrical  $\alpha,\alpha$ -Diarylacetates  
via Organocatalyzed Formal C–H Insertion Reactions of  
Sulfoxonium Ylides with Indoles and Pyrroles**

Xin Yue,<sup>a‡</sup> Shi-Jia Li,<sup>b‡</sup> Tianyuan Ou,<sup>a</sup> Zhenying Xiong,<sup>a</sup> Feng Jiang,<sup>a</sup> Ying Zhou,<sup>a</sup> Lijuan Song,<sup>c\*</sup>  
Yupei Zhao,<sup>a\*</sup> Wengang Guo<sup>a\*</sup>

<sup>a</sup>*School of Petrochemical Engineering, Changzhou University, Changzhou, Jiangsu 213164, P. R. China*

<sup>b</sup>*Department of Chemistry, The Hong Kong University of Science and Technology (HKUST), Clear Water Bay, Kowloon 999077, Hong Kong SAR, P. R. China*

<sup>c</sup>*School of Science, Harbin Institute of Technology (Shenzhen), Shenzhen 518055, P. R. China*

<sup>‡</sup> *These authors contributed equally to this work*

Email: songlijuan@hit.edu.cn (Lijuan Song); zhaoyupei@cczu.edu.cn (Yupei Zhao);  
wgguo@cczu.edu.cn (Wengang Guo)

## Table of Contents

|       |                                                                                |      |
|-------|--------------------------------------------------------------------------------|------|
| I.    | General Information .....                                                      | 3    |
| II.   | Synthesis of Sulfoxonium Ylide .....                                           | 4    |
| III.  | Synthesis of $\alpha$ -substituted pyrrole .....                               | 4    |
| IV.   | Catalytic Asymmetric Synthesis of $\alpha,\alpha$ -Heterodiaryl Acetates ..... | 4    |
| V.    | Unsuccessful Carbon Nucleophiles .....                                         | 52   |
| VI.   | The Procedure for Gram-Scale Synthesis and Synthetic Transformation.....       | 53   |
| VII.  | Mechanistic Study .....                                                        | 61   |
| VIII. | DFT Calculations .....                                                         | 66   |
| IX.   | The Stereochemistry of Product.....                                            | 225  |
|       | NMR Spectra and HPLC Traces.....                                               | S228 |

## I. General Information

Flash column chromatography was performed over silica gel (200–300 mesh) purchased from Qindao Puke Co., China. All air or moisture sensitive reactions were conducted in oven-dried glassware under nitrogen atmosphere using anhydrous solvents. Anhydrous acetonitrile was purified by the Innovative® solvent purification system or purchased from J&K Scientific Ltd. Trimethylsulfoxonium iodide, KO<sup>t</sup>Bu, aryl bromides, aryl acyl chloride used in this study were purchased from Energy Chemical, and used as received. XPhos and anilines used in this study were purchased from Shanghai Haohong Scientific Co., Ltd (Leyan). Other solvents (such as DCM, MeOH, THF, EA, and *n*-hexane) used in this study all were purchased from Energy Chemical, and directly used without further purification. <sup>1</sup>H, <sup>13</sup>C and <sup>19</sup>F NMR spectra were collected on a Bruker AV 400 or 300 MHz NMR spectrometer using residue solvent peaks as an internal standard (<sup>1</sup>H NMR: CDCl<sub>3</sub> at 7.26 ppm; <sup>13</sup>C NMR: CDCl<sub>3</sub> at 77.0 ppm). Mass spectra were collected on an Agilent GC/MS 5975C system, a MALDI Micro MX mass spectrometer, or an API QSTAR XL System with TOF as mass analyzer. Optical rotations were measured on Shanghai Shengguang polarimeter with [α]<sub>D</sub> values reported in degrees. The enantiomeric excess values were determined by chiral HPLC using an Agilent 1260 LC system with a Daicel CHIRALCEL OD-H column, or a Daicel CHIRALPAK AD-H, IC and AS-H column. Unless otherwise noted, the racemic samples in this study were prepared using the racemic catalyst 1,1'-binaphthyl-2,2'-diyl hydrogenphosphate (10 mol%). The optimal catalysts (*S*)-**HA-10** and (*R*)-**HA-10** were synthesized according to the literature procedure.<sup>1</sup>

---

(1) H. Ishihara, J. Huang, T. Mochizuki, M. Hatano, K. Ishihara, *ACS Catal.*, 2021, **11**, 6121–6127.

## II. Synthesis of Sulfoxonium Ylide

All the sulfoxonium ylides used in this work are known compounds and were synthesized according to the literature procedure.<sup>2-3</sup>

## III. Synthesis of $\alpha$ -substituted pyrrole

$\alpha$ -Substituted pyrrole used in this work are known compounds and were synthesized according to the literature procedure.<sup>4</sup>

## IV. Catalytic Asymmetric Synthesis of $\alpha,\alpha$ -Heterodiaryl Acetates

### General Procedure A.

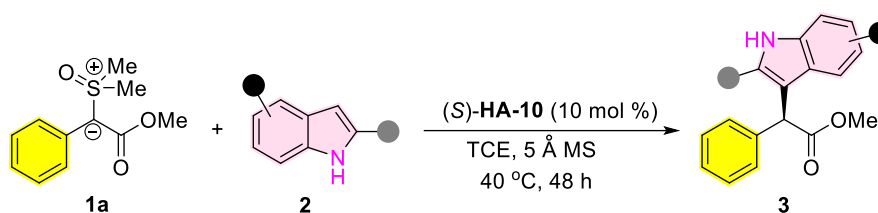

In an oven-dried 4-mL vial equipped with a magnetic stirring bar, sulfoxonium ylide **1a** (0.2 mmol, 1.0 equiv), CPA catalyst (S)-HA-10 (14.6 mg, 10 mol %), and 5 Å molecular sieves (100 mg) were combined. Subsequently, 1.0 mL of TCE was added, followed by the addition of indole **2** (0.22 mmol, 1.1 equiv). The resulting mixture was stirred at 40 °C and monitored by TLC. After completion (48 h), the mixture was directly subjected to flash column chromatography on silica gel (eluent: hexanes/ethyl acetate = 10:1 to 5:1) to afford the desired product **3**.

(2) C. Janot, P. Palamini, B. C. Dobson, J. Muir, C. Aïssa, *Org. Lett.*, 2019, **21**, 296–299.

(3) J. Lu, L. Li, X.-K. He, G.-Y. Xu, J. Xuan, *Chin. J. Chem.*, 2021, **39**, 1646–1650.

(4) S. J. Mishra, S. Ghosh, A. R. Stothert, C. A. Dickey, B. S. J. Blagg, *ACS Chem. Biol.*, 2017, **12**, 244–253.



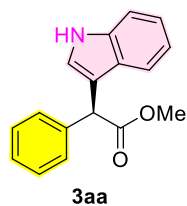

**Methyl (S)-2-(1H-indol-3-yl)-2-phenylacetate (3aa)** was prepared as a colorless oil according to the General Procedure A (eluent: hexanes/EtOAc = 10:1, 38.0 mg, 71% yield, 89% ee).

$[\alpha]_D^{25}$ : +12.1 ( $c = 1.0$ ,  $\text{CH}_2\text{Cl}_2$ ). HPLC analysis of the product: Daicel CHIRALPAK<sup>®</sup> IC column; 10% *i*-PrOH in *n*-hexane; 1.0 mL/min; retention times: 8.5 min (major), 14.0 min (minor).

<sup>1</sup>H NMR (300 MHz,  $\text{CDCl}_3$ )  $\delta$  8.03 (s, 1H), 7.37 – 7.32 (m, 3H), 7.24 – 7.16 (m, 4H), 7.10 – 6.95 (m, 3H), 5.18 (s, 1H), 3.65 (s, 3H) ppm.

<sup>13</sup>C NMR (75 MHz,  $\text{CDCl}_3$ )  $\delta$  173.6, 138.6, 136.3, 128.6, 128.5, 127.3, 126.6, 123.3, 122.3, 119.8, 119.0, 113.6, 111.3, 52.3, 48.9 ppm.

HRMS (ESI+) Calcd for  $\text{C}_{17}\text{H}_{16}\text{NO}_2$   $[\text{M}+\text{H}]^+$ : 266.1176, found: 266.1168.

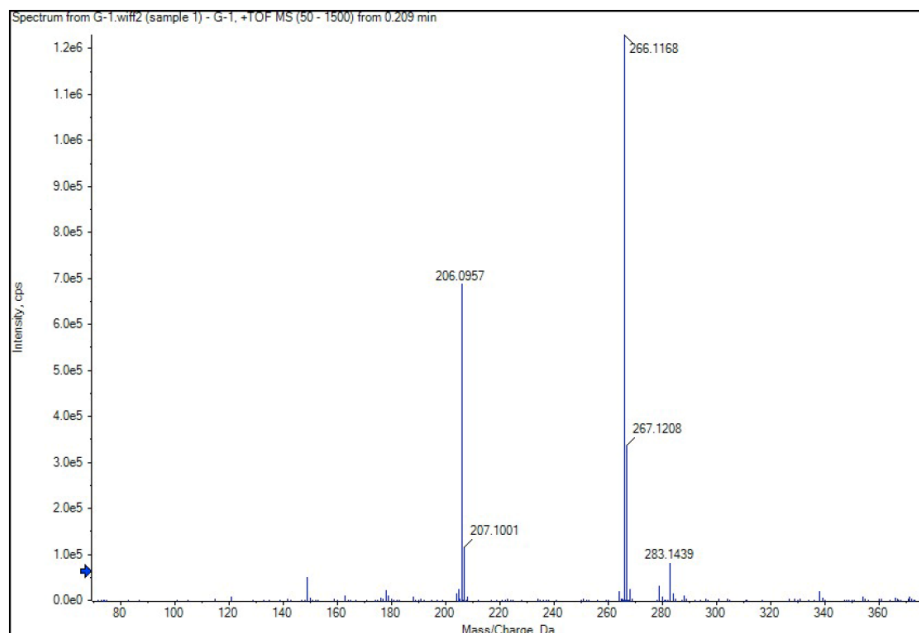

Note: It is a known compound, the spectroscopy data were in good agreement with the literature.<sup>5</sup>

(5) J. M. Fraile, K. L. Jeune, J. A. Mayoral, N. Ravasio, F. Zaccheria, *Org. Biomol. Chem.*, 2013, **11**, 4327–4332.

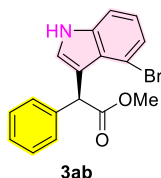

**Methyl (S)-2-(4-bromo-1H-indol-3-yl)-2-phenylacetate (3ab)** was prepared as a brown solid according to the General Procedure A (eluent: hexanes/EtOAc = 10:1, 38.2 mg, 55% yield, 88% ee).

$[\alpha]_D^{25}$ :  $-56.6$  ( $c = 1.0$ ,  $\text{CH}_2\text{Cl}_2$ ). HPLC analysis of the product: Daicel CHIRALPAK<sup>®</sup> IC column; 10% *i*-PrOH in *n*-hexane; 1.0 mL/min; retention times: 7.8 min (major), 18.0 min (minor).

$^1\text{H NMR}$  (400 MHz,  $\text{CDCl}_3$ )  $\delta$  8.34 (s, 1H), 7.35 – 7.34 (m, 4H), 7.32 – 7.28 (m, 1H), 7.24 – 7.21 (m, 1H), 7.13 – 7.11 (m, 1H), 6.95 – 6.90 (m, 1H), 6.753 – 6.747 (m, 1H), 5.94 (s, 1H), 3.75 (s, 3H) ppm.

$^{13}\text{C NMR}$  (100 MHz,  $\text{CDCl}_3$ )  $\delta$  174.5, 138.7, 137.7, 128.7, 128.6, 127.3, 125.9, 124.7, 124.3, 123.1, 114.8, 113.7, 110.8, 52.6, 48.9 ppm.

**HRMS** (ESI+) Calcd for  $\text{C}_{17}\text{H}_{15}\text{BrNO}_2$   $[\text{M}+\text{H}]^+$ : 344.0281, found: 344.0273.

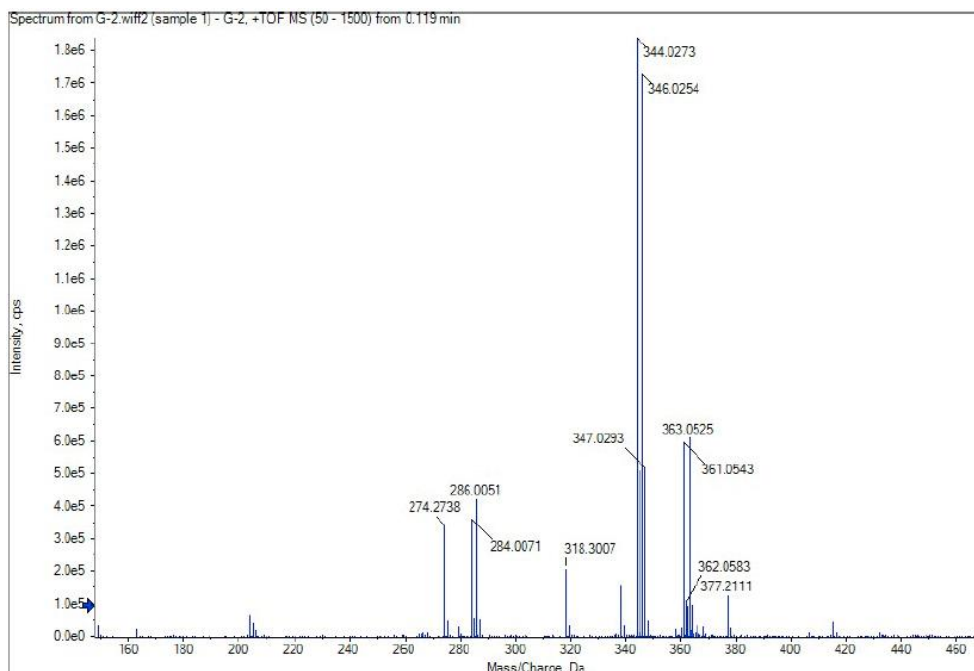

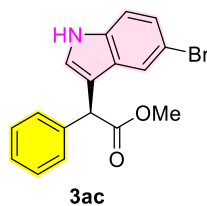

**Methyl (S)-2-(5-bromo-1H-indol-3-yl)-2-phenylacetate (3ac)** was prepared as a white solid according to the General Procedure A (eluent: hexanes/EtOAc = 10:1, 47.0 mg, 68% yield, 92% ee).

$[\alpha]_D^{25}$ :  $-47.2$  ( $c = 1.0$ ,  $\text{CH}_2\text{Cl}_2$ ). HPLC analysis of the product: Daicel CHIRALPAK<sup>®</sup> IC column; 10% *i*-PrOH in *n*-hexane; 1.0 mL/min; retention times: 5.7 min (major), 6.6 min (minor).

<sup>1</sup>H NMR (400 MHz,  $\text{CDCl}_3$ )  $\delta$  8.20 (s, 1H), 7.56 – 7.55 (m, 1H), 7.39 – 7.37 (m, 2H), 7.34 – 7.30 (m, 2H), 7.29 – 7.27 (m, 1H), 7.25 – 7.22 (m, 1H), 7.18 – 7.13 (m, 2H), 5.18 (s, 1H), 3.75 (s, 3H) ppm.

<sup>13</sup>C NMR (100 MHz,  $\text{CDCl}_3$ )  $\delta$  173.3, 138.1, 134.9, 128.7, 128.33, 128.28, 127.5, 125.2, 124.6, 121.5, 113.3, 113.1, 112.8, 52.5, 48.6 ppm.

HRMS (ESI+) Calcd for  $\text{C}_{17}\text{H}_{15}\text{BrNO}_2$   $[\text{M}+\text{H}]^+$ : 344.0281, found: 344.0277.

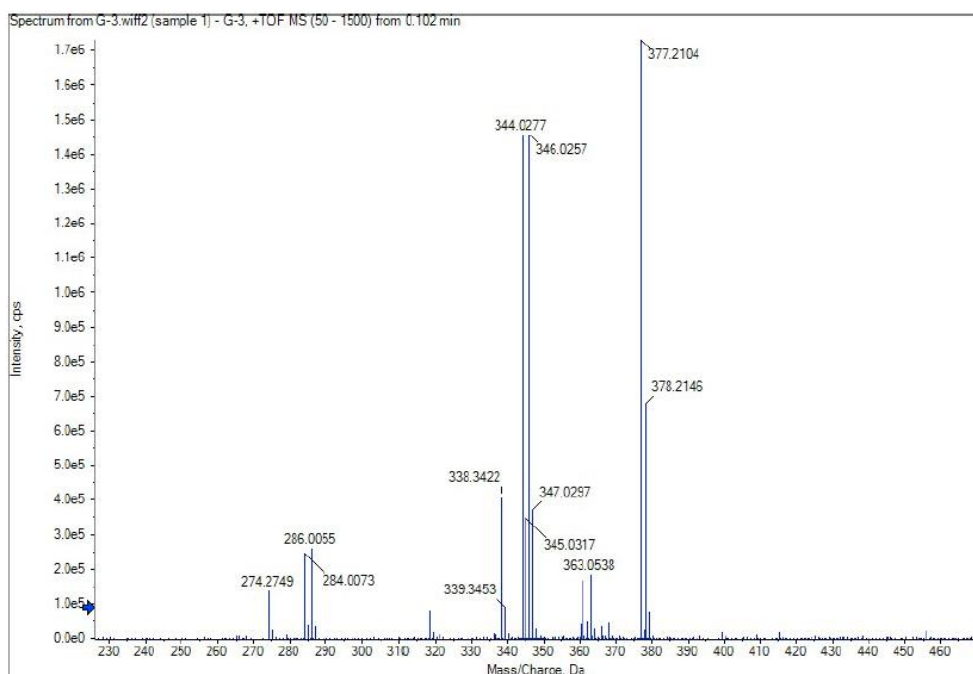

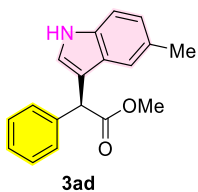

**Methyl (S)-2-(5-methyl-1H-indol-3-yl)-2-phenylacetate (3ad)** was prepared as a yellow solid according to the General Procedure A (eluent: hexanes/EtOAc = 10:1, 42.1 mg, 75% yield, 88% ee).

$[\alpha]_D^{25}$ : +1.5 ( $c = 1.0$ ,  $\text{CH}_2\text{Cl}_2$ ). HPLC analysis of the product: Daicel CHIRALPAK® IC column; 10% *i*-PrOH in *n*-hexane; 1.0 mL/min; retention times: 8.1 min (major), 10.0 min (minor).

$^1\text{H NMR}$  (400 MHz,  $\text{CDCl}_3$ )  $\delta$  8.02 (s, 1H), 7.42 – 7.40 (m, 2H), 7.32 – 7.29 (m, 2H), 7.27 – 7.19 (m, 3H), 7.090 – 7.085 (m, 1H), 7.00 – 6.98 (m, 1H), 5.24 (s, 1H), 3.73 (s, 3H), 2.39 (s, 3H) ppm.

$^{13}\text{C NMR}$  (100 MHz,  $\text{CDCl}_3$ )  $\delta$  173.7, 138.6, 134.6, 129.0, 128.6, 128.4, 127.3, 126.8, 124.0, 123.4, 118.5, 113.1, 111.0, 52.4, 48.8, 21.6 ppm.

**HRMS (ESI+)** Calcd for  $\text{C}_{18}\text{H}_{18}\text{NO}_2$   $[\text{M}+\text{H}]^+$ : 280.1332, found: 280.1325.

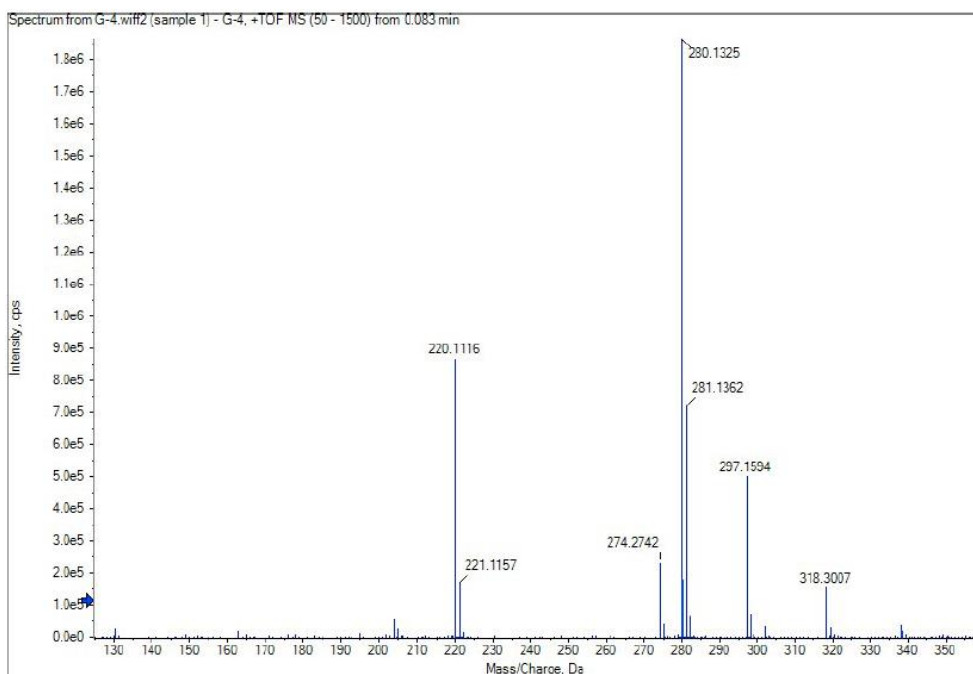

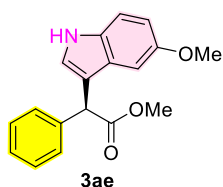

**Methyl (S)-2-(5-methoxy-1H-indol-3-yl)-2-phenylacetate (3ae)** was prepared as a yellow oil according to the General Procedure A (eluent: hexanes/EtOAc = 10:1, 42.8 mg, 72% yield, 89% ee).

$[\alpha]_{\text{D}}^{25}$ :  $-12.5$  ( $c = 1.0$ ,  $\text{CH}_2\text{Cl}_2$ ). HPLC analysis of the product: Daicel CHIRALPAK® IC column; 10% *i*-PrOH in *n*-hexane; 1.0 mL/min; retention times: 13.9 min (major), 24.7 min (minor).

$^1\text{H NMR}$  (400 MHz,  $\text{CDCl}_3$ )  $\delta$  8.04 (s, 1H), 7.42 – 7.40 (m, 2H), 7.33 – 7.29 (m, 2H), 7.27 – 7.20 (m, 2H), 7.13 – 7.12 (m, 1H), 6.87 – 6.82 (m, 2H), 5.22 (s, 1H), 3.77 (s, 3H), 3.75 (s, 3H) ppm.

$^{13}\text{C NMR}$  (100 MHz,  $\text{CDCl}_3$ )  $\delta$  173.5, 154.1, 138.5, 131.4, 128.6, 128.4, 127.3, 127.0, 124.0, 113.3, 112.4, 112.0, 100.9, 55.8, 52.4, 48.9 ppm.

**HRMS (ESI+)** Calcd for  $\text{C}_{18}\text{H}_{18}\text{NO}_3$   $[\text{M}+\text{H}]^+$ : 296.1281, found: 296.1276.

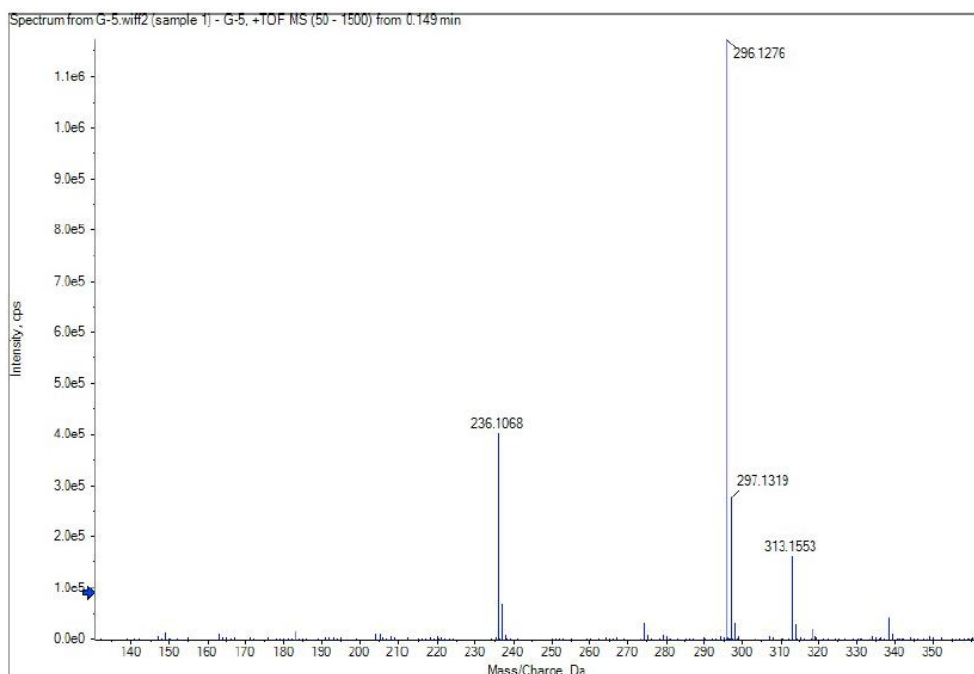

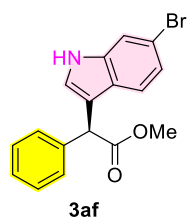

**Methyl (S)-2-(6-bromo-1H-indol-3-yl)-2-phenylacetate (3af)** was prepared as a brown oil according to the General Procedure A (eluent: hexanes/EtOAc = 10:1, 42.0 mg, 61% yield, 89% ee).

$[\alpha]_{D^{25}}$ : +2.7 ( $c = 1.0$ ,  $\text{CH}_2\text{Cl}_2$ ). HPLC analysis of the product: Daicel CHIRALPAK® AD-H column; 10% *i*-PrOH in *n*-hexane; 1.0 mL/min; retention times: 25.0 min (major), 28.5 min (minor).

$^1\text{H NMR}$  (400 MHz,  $\text{CDCl}_3$ )  $\delta$  8.16 (s, 1H), 7.46 – 7.45 (m, 1H), 7.39 – 7.37 (m, 2H), 7.33 – 7.29 (m, 2H), 7.28 – 7.25 (m, 2H), 7.16 – 7.11 (m, 2H), 5.21 (s, 1H), 3.75 (s, 3H) ppm.

$^{13}\text{C NMR}$  (100 MHz,  $\text{CDCl}_3$ )  $\delta$  173.3, 138.2, 137.1, 128.7, 128.4, 127.5, 125.5, 123.9, 123.1, 120.3, 115.9, 114.2, 113.9, 52.5, 48.7 ppm.

**HRMS (ESI+)** Calcd for  $\text{C}_{17}\text{H}_{15}\text{BrNO}_2$   $[\text{M}+\text{H}]^+$ : 344.0281, found: 344.0278.

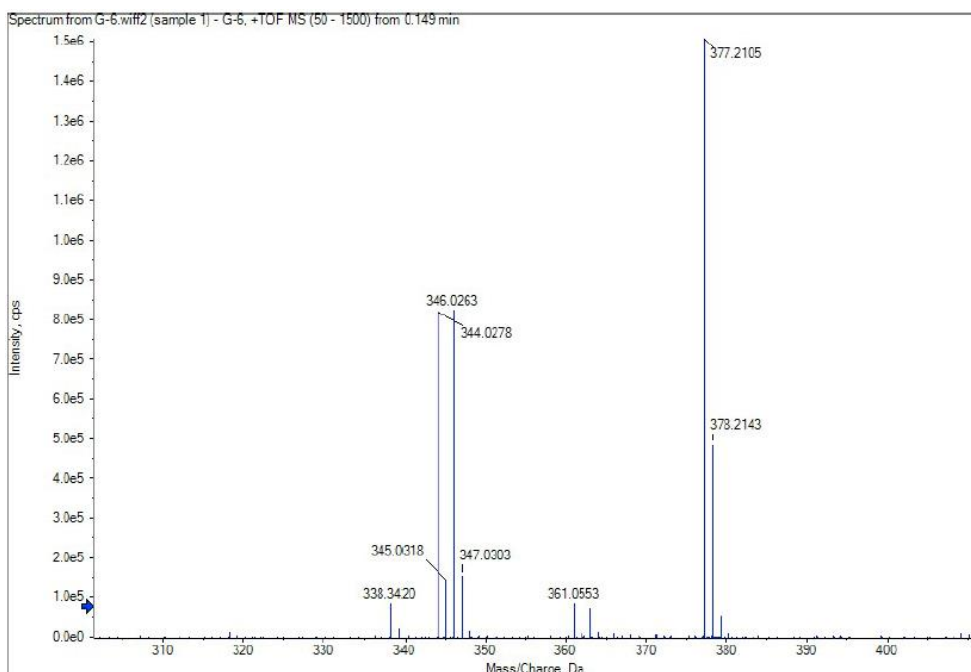

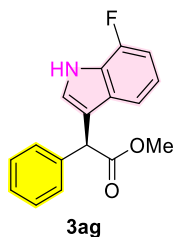

**Methyl (S)-2-(7-fluoro-1H-indol-3-yl)-2-phenylacetate (3ag)** was prepared as a yellow oil according to the General Procedure A (eluent: hexanes/EtOAc = 10:1, 40.0 mg, 70% yield, 94% ee).

$[\alpha]_D^{25}$ : +3.4 ( $c = 1.0$ ,  $\text{CH}_2\text{Cl}_2$ ). HPLC analysis of the product: Daicel CHIRALPAK® AD-H column; 10% *i*-PrOH in *n*-hexane; 1.0 mL/min; retention times: 14.4 min (major), 17.8 min (minor).

$^1\text{H NMR}$  (300 MHz,  $\text{CDCl}_3$ )  $\delta$  8.27 (s, 1H), 7.33 – 7.30 (m, 2H), 7.25 – 7.15 (m, 3H), 7.12 – 7.09 (m, 2H), 6.91 – 6.76 (m, 2H), 5.15 (s, 1H), 3.66 (s, 3H) ppm.

$^{13}\text{C NMR}$  (75 MHz,  $\text{CDCl}_3$ )  $\delta$  173.3, 149.6 (d,  $^1J_{\text{C-F}} = 242.4$  Hz), 138.3, 130.3 (d,  $^3J_{\text{C-F}} = 5.2$  Hz), 128.7, 128.4, 127.4, 124.7 (d,  $^2J_{\text{C-F}} = 13.5$  Hz), 124.0, 120.0 (d,  $^3J_{\text{C-F}} = 6.2$  Hz), 114.8 (d,  $^4J_{\text{C-F}} = 3.0$  Hz), 114.6 (d,  $^4J_{\text{C-F}} = 2.2$  Hz), 107.1 (d,  $^2J_{\text{C-F}} = 15.9$  Hz), 52.4, 48.9 ppm.

$^{19}\text{F NMR}$  (282 MHz,  $\text{CDCl}_3$ )  $\delta$  -135.3 ppm.

**HRMS** (ESI+) Calcd for  $\text{C}_{17}\text{H}_{15}\text{FNO}_2$   $[\text{M}+\text{H}]^+$ : 284.1081, found: 284.1075.

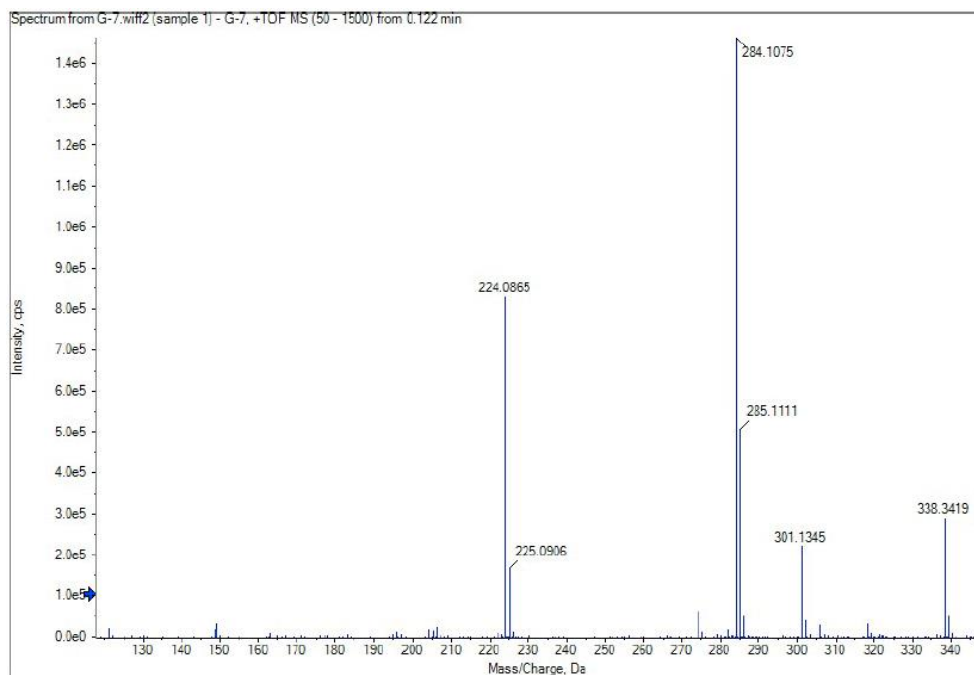

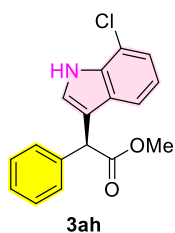

**Methyl (S)-2-(7-chloro-1H-indol-3-yl)-2-phenylacetate (3ah)** was prepared as a yellow solid according to the General Procedure A (eluent: hexanes/EtOAc = 10:1, 41.2 mg, 68% yield, 96% ee).

$[\alpha]_D^{25}$ : +21.8 ( $c = 1.0$ ,  $\text{CH}_2\text{Cl}_2$ ). HPLC analysis of the product: Daicel CHIRALPAK® AD-H column; 10% *i*-PrOH in *n*-hexane; 1.0 mL/min; retention times: 17.5 min (major), 21.3 min (minor).

$^1\text{H NMR}$  (300 MHz,  $\text{CDCl}_3$ )  $\delta$  8.29 (s, 1H), 7.32 – 7.29 (m, 2H), 7.25 – 7.06 (m, 6H), 6.89 (t,  $J = 7.8$  Hz, 1H), 5.15 (s, 1H), 3.66 (s, 3H) ppm.

$^{13}\text{C NMR}$  (75 MHz,  $\text{CDCl}_3$ )  $\delta$  173.2, 138.2, 133.6, 128.7, 128.4, 128.1, 127.5, 124.0, 121.7, 120.6, 117.7, 116.8, 114.8, 52.4, 48.9 ppm.

**HRMS** (ESI+) Calcd for  $\text{C}_{17}\text{H}_{15}\text{ClNO}_2$   $[\text{M}+\text{H}]^+$ : 300.0786, found: 300.0783.

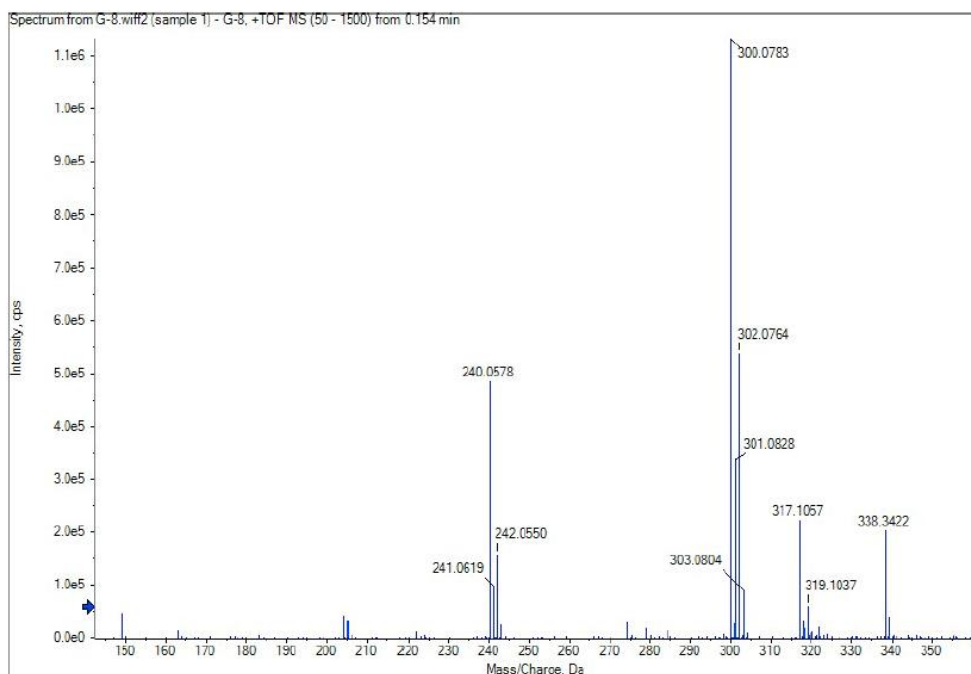



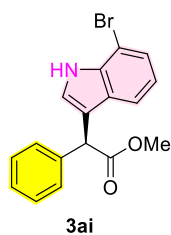

**Methyl (S)-2-(7-bromo-1H-indol-3-yl)-2-phenylacetate (3ai)** was prepared as a white solid according to the General Procedure A (eluent: hexanes/EtOAc = 10:1, 47.0 mg, 68% yield, 96% ee).

$[\alpha]_D^{25}$ : +34.7 ( $c = 1.0$ ,  $\text{CH}_2\text{Cl}_2$ ). HPLC analysis of the product: Daicel CHIRALPAK<sup>®</sup> IC column; 10% *i*-PrOH in *n*-hexane; 1.0 mL/min; retention times: 6.4 min (major), 7.0 min (minor).

<sup>1</sup>H NMR (300 MHz,  $\text{CDCl}_3$ )  $\delta$  8.31 (s, 1H), 7.40 – 7.38 (m, 2H), 7.36 – 7.31 (m, 3H), 7.29 – 7.24 (m, 3H), 6.94 (t,  $J = 7.8$  Hz, 1H), 5.23 (s, 1H), 3.75 (s, 3H) ppm.

<sup>13</sup>C NMR (100 MHz,  $\text{CDCl}_3$ )  $\delta$  173.2, 138.2, 135.0, 128.7, 128.4, 127.7, 127.5, 124.7, 123.9, 121.0, 118.4, 114.9, 104.9, 52.5, 49.0 ppm.

HRMS (ESI+) Calcd for  $\text{C}_{17}\text{H}_{15}\text{BrNO}_2$   $[\text{M}+\text{H}]^+$ : 344.0281, found: 344.0276.

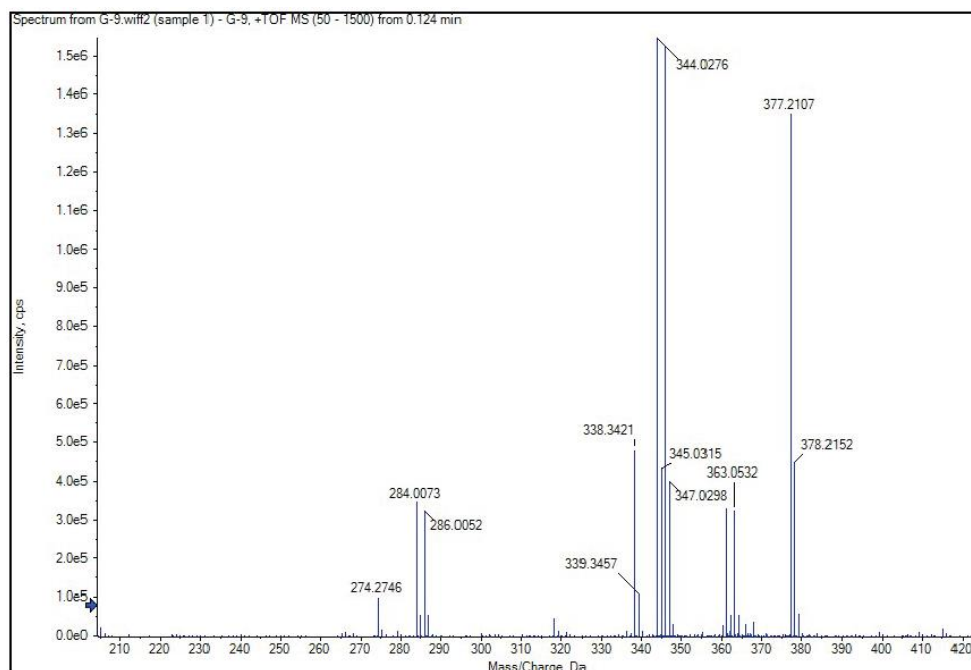

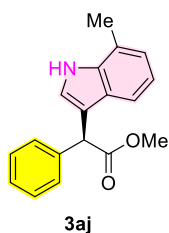

**Methyl (S)-2-(7-methyl-1H-indol-3-yl)-2-phenylacetate (3aj)** was prepared as a red solid according to the General Procedure A (eluent: hexanes/EtOAc = 10:1, 36.0 mg, 65% yield, 93% ee).

$[\alpha]_D^{25}$ : +13.7 ( $c = 1.0$ ,  $\text{CH}_2\text{Cl}_2$ ). HPLC analysis of the product: Daicel CHIRALPAK<sup>®</sup> IC column; 10% *i*-PrOH in *n*-hexane; 1.0 mL/min; retention times: 7.7 min (major), 17.4 min (minor).

<sup>1</sup>H NMR (400 MHz,  $\text{CDCl}_3$ )  $\delta$  8.00 (s, 1H), 7.33 – 7.31 (m, 2H), 7.23 – 7.13 (m, 4H), 7.03 – 7.02 (m, 1H), 6.92 – 6.87 (m, 2H), 5.17 (s, 1H), 3.65 (s, 3H), 2.33 (s, 3H) ppm.

<sup>13</sup>C NMR (100 MHz,  $\text{CDCl}_3$ )  $\delta$  173.7, 138.6, 135.9, 128.6, 128.5, 127.3, 126.1, 123.1, 122.9, 120.5, 120.0, 116.7, 114.1, 52.4, 49.0, 16.6 ppm.

HRMS (ESI+) Calcd for  $\text{C}_{18}\text{H}_{18}\text{NO}_2$   $[\text{M}+\text{H}]^+$ : 280.1332, found: 280.1328.

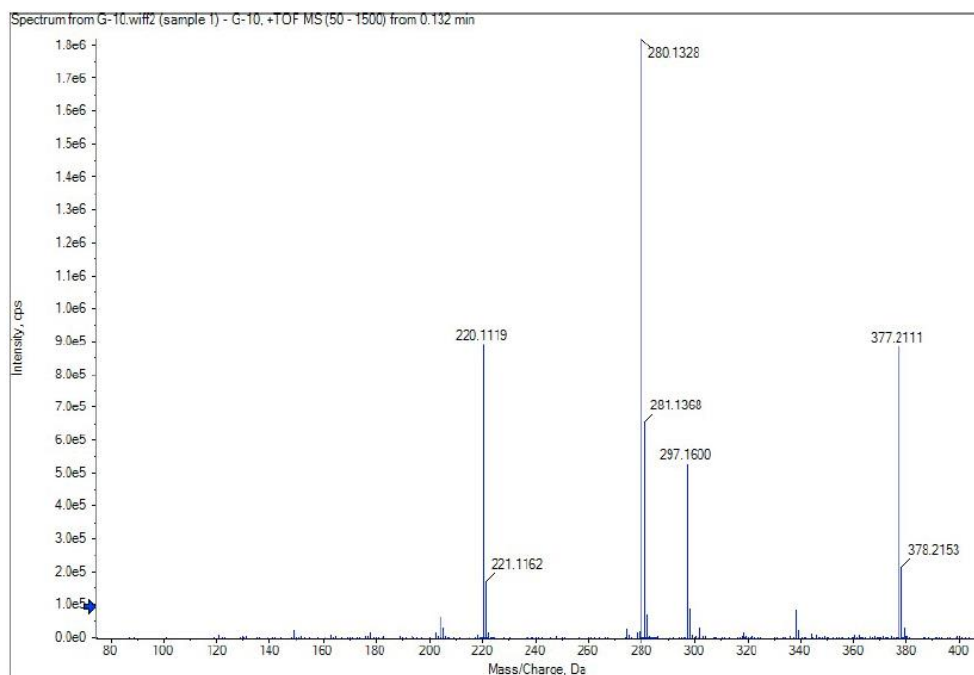

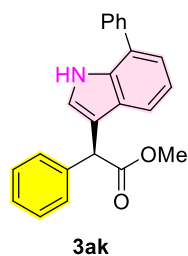

**Methyl (S)-2-phenyl-2-(7-phenyl-1H-indol-3-yl)acetate (3ak)** was prepared as a brown oil according to the General Procedure A (eluent: hexanes/EtOAc = 10:1, 50.0 mg, 73% yield, 87% ee).

$[\alpha]_D^{25}$ : +16.9 ( $c = 1.0$ ,  $\text{CH}_2\text{Cl}_2$ ). HPLC analysis of the product: Daicel CHIRALPAK<sup>®</sup> IC column; 10% *i*-PrOH in *n*-hexane; 1.0 mL/min; retention times: 6.4 min (major), 9.4 min (minor).

<sup>1</sup>H NMR (300 MHz,  $\text{CDCl}_3$ )  $\delta$  8.25 (s, 1H), 7.53 – 7.50 (m, 2H), 7.43 – 7.31(m, 6H), 7.28 – 7.16 (m, 3H), 7.13 – 7.04 (m, 3H), 5.21 (s, 1H), 3.67 (s, 3H) ppm.

<sup>13</sup>C NMR (75 MHz,  $\text{CDCl}_3$ )  $\delta$  173.4, 139.0, 138.5, 134.1, 129.2, 128.6, 128.5, 128.3, 127.5, 127.3, 127.0, 125.8, 123.5, 122.3, 120.3, 118.3, 114.1, 52.4, 49.0 ppm.

**HRMS (ESI+)** Calcd for  $\text{C}_{23}\text{H}_{20}\text{NO}_2$   $[\text{M}+\text{H}]^+$ : 342.1489, found: 342.1482.

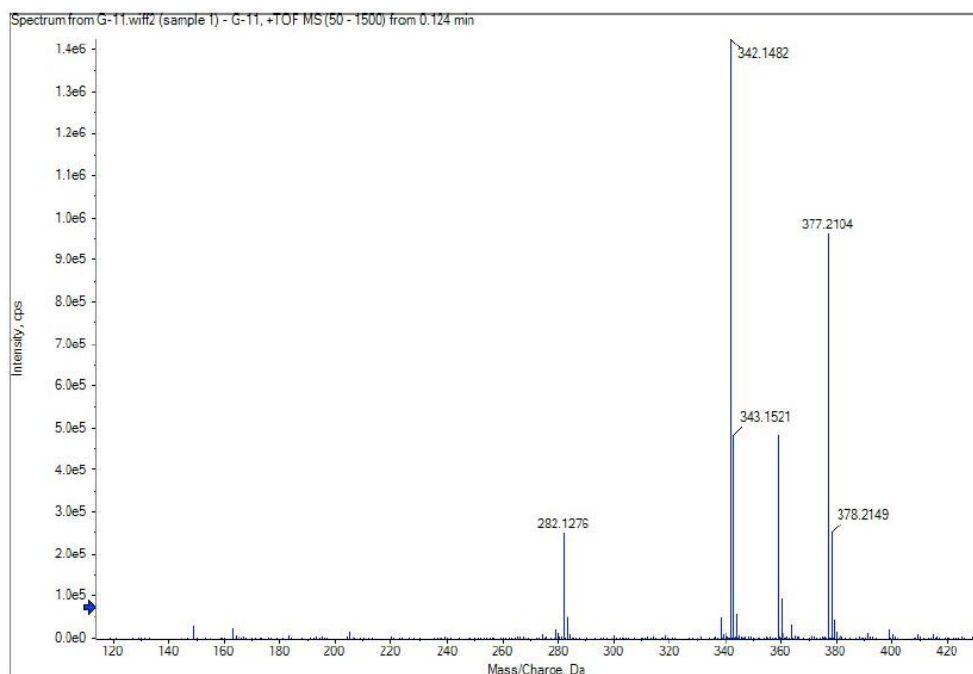

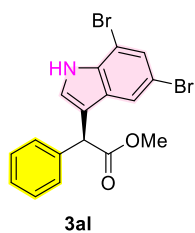

**Methyl (S)-2-(5,7-dibromo-1H-indol-3-yl)-2-phenylacetate (3al)** was prepared as a yellow solid according to the General Procedure A (eluent: hexanes/EtOAc = 10:1, 61.0 mg, 72% yield, 97% ee).

$[\alpha]_D^{25}$ :  $-13.2$  ( $c = 1.0$ ,  $\text{CH}_2\text{Cl}_2$ ). HPLC analysis of the product: Daicel CHIRALPAK® AD-H column; 15% *i*-PrOH in *n*-hexane; 1.0 mL/min; retention times: 6.1 min (major), 8.5 min (minor).

$^1\text{H NMR}$  (300 MHz,  $\text{CDCl}_3$ )  $\delta$  8.31 (s, 1H), 7.41 (s, 1H), 7.33 (s, 1H), 7.29 – 7.13 (m, 6H), 5.07 (s, 1H), 3.66 (s, 3H) ppm.

$^{13}\text{C NMR}$  (75 MHz,  $\text{CDCl}_3$ )  $\delta$  173.0, 137.8, 133.9, 128.8 (two C), 128.3, 127.6, 127.0, 125.2, 121.0, 114.6, 112.8, 105.3, 52.6, 48.7 ppm.

**HRMS (ESI+)** Calcd for  $\text{C}_{17}\text{H}_{14}\text{Br}_2\text{NO}_2$   $[\text{M}+\text{H}]^+$ : 421.9386, found: 421.9387.

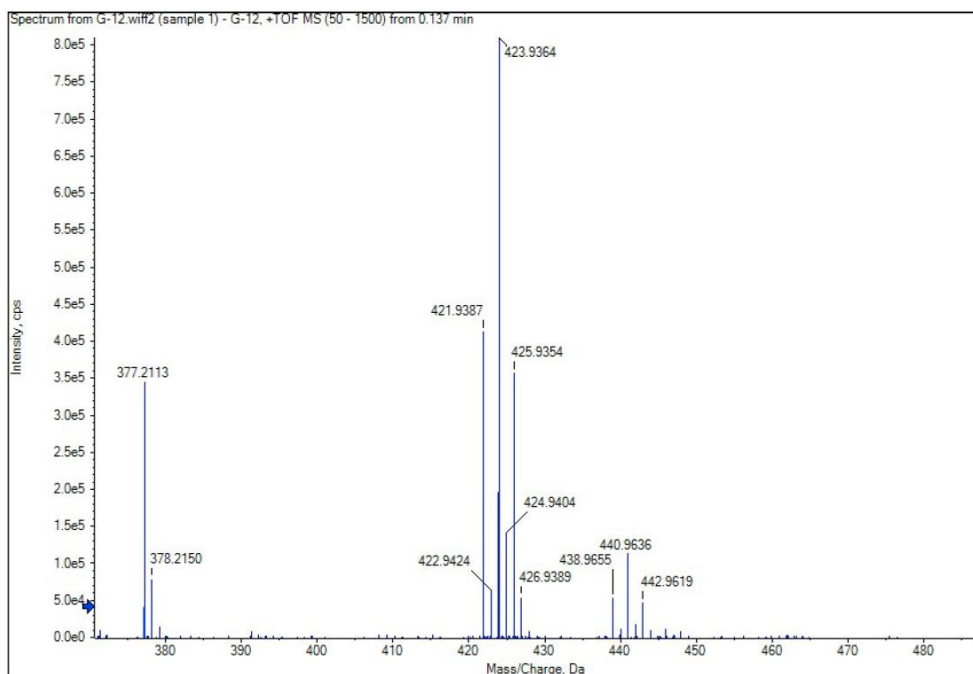

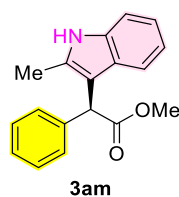

**Methyl (S)-2-(2-methyl-1H-indol-3-yl)-2-phenylacetate (3am)** was prepared as a colorless solid according to the General Procedure A (eluent: hexanes/EtOAc = 10:1, 42.0 mg, 75% yield, 54% ee).

$[\alpha]_D^{25}$ : +25.2 ( $c = 1.0$ ,  $\text{CH}_2\text{Cl}_2$ ). HPLC analysis of the product: Daicel CHIRALPAK<sup>®</sup> IC column; 10% *i*-PrOH in *n*-hexane; 1.0 mL/min; retention times: 7.6 min (major), 9.5 min (minor).

<sup>1</sup>H NMR (300 MHz,  $\text{CDCl}_3$ )  $\delta$  7.81 (s, 1H), 7.37 (d,  $J = 7.8$  Hz, 1H), 7.19 – 7.11 (m, 6H), 7.03 – 6.91 (m, 2H), 5.19 (s, 1H), 3.63 (s, 3H), 2.19 (s, 3H) ppm.

<sup>13</sup>C NMR (75 MHz,  $\text{CDCl}_3$ )  $\delta$  173.8, 138.7, 135.2, 133.1, 128.4 (two C), 127.8, 126.9, 121.2, 119.7, 119.3, 110.4, 108.5, 52.2, 48.0, 12.1 ppm.

HRMS (ESI+) Calcd for  $\text{C}_{18}\text{H}_{18}\text{NO}_2$   $[\text{M}+\text{H}]^+$ : 280.1332, found: 280.1329.

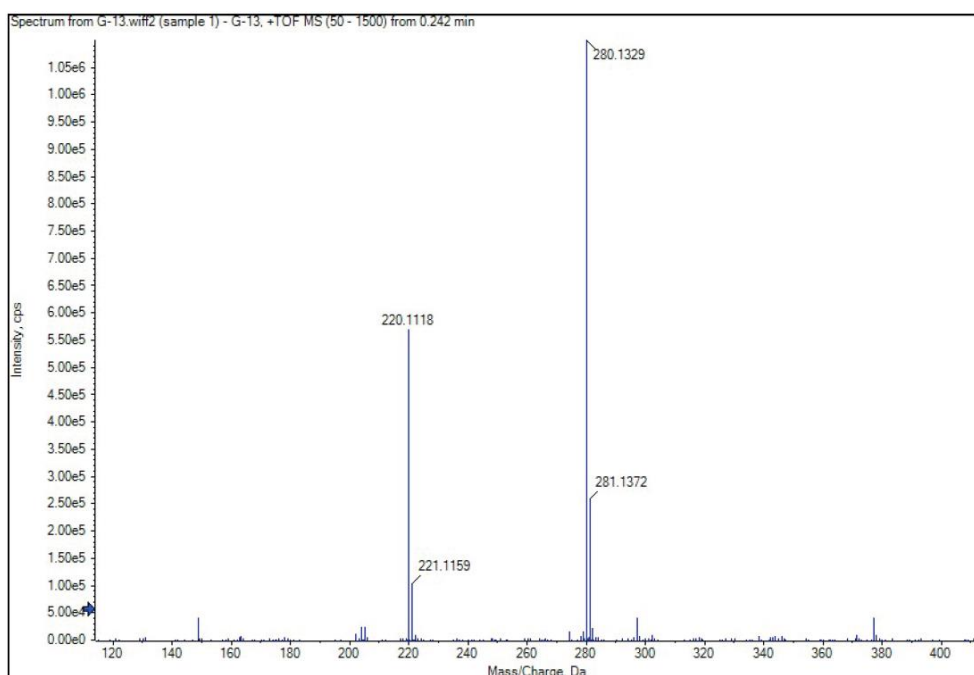

Note: It is a known compound, the spectroscopy data were in good agreement with the literature.<sup>6</sup>

(6) A. N. Leveille, R. Echemendía, A. E. Mattson, A. C. B. Burtoloso, *Org. Lett.*, 2021, **23**, 9446–9450.

## General Procedure B.

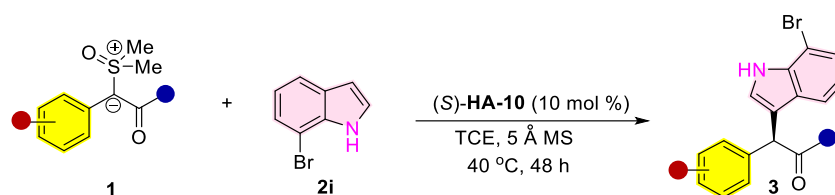

In an oven-dried 4-mL vial equipped with a magnetic stirring bar, sulfoxonium ylide **1** (0.2 mmol, 1.0 equiv), CPA catalyst (S)-HA-10 (14.6 mg, 10 mol %), and 5 Å molecular sieves (100 mg) were combined. Subsequently, 1.0 mL of TCE was added, followed by the addition of indole **2i** (43.1 mg, 0.22 mmol, 1.1 equiv). The resulting mixture was stirred at 40 °C and monitored by TLC. After completion (48 h), the mixture was directly subjected to flash column chromatography on silica gel (eluent: hexanes/ethyl acetate = 10:1 to 5:1) to afford the desired product **3**.

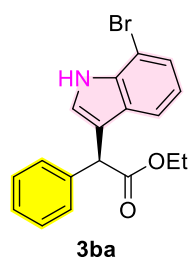

Ethyl (S)-2-(7-bromo-1H-indol-3-yl)-2-phenylacetate (**3ba**) was prepared as a colorless oil according to the General Procedure B (eluent: hexanes/EtOAc = 10:1, 53.2 mg, 74% yield, 93% ee).

$[\alpha]_{\text{D}}^{25}$ : +28.3 ( $c = 1.5$ ,  $\text{CH}_2\text{Cl}_2$ ). HPLC analysis of the product: Daicel CHIRALPAK® IC column; 10% *i*-PrOH in *n*-hexane; 1.0 mL/min; retention times: 6.0 min (major), 6.6 min (minor).

$^1\text{H NMR}$  (400 MHz,  $\text{CDCl}_3$ )  $\delta$  8.32 (s, 1H), 7.41 – 7.37 (m, 3H), 7.32 – 7.23 (m, 5H), 6.93 (t,  $J = 7.8$  Hz, 1H), 5.20 (s, 1H), 4.25 – 4.17 (m, 2H), 1.25 (t,  $J = 7.0$  Hz, 3H) ppm.

$^{13}\text{C NMR}$  (100 MHz,  $\text{CDCl}_3$ )  $\delta$  172.7, 138.3, 135.0, 128.6, 128.4, 127.8, 127.4, 124.7, 123.9, 120.9, 118.4, 115.1, 104.9, 61.3, 49.1, 14.2 ppm.

HRMS (ESI+) Calcd for C<sub>18</sub>H<sub>17</sub>BrNO<sub>2</sub> [M+H]<sup>+</sup>: 358.0437, found: 358.0430.

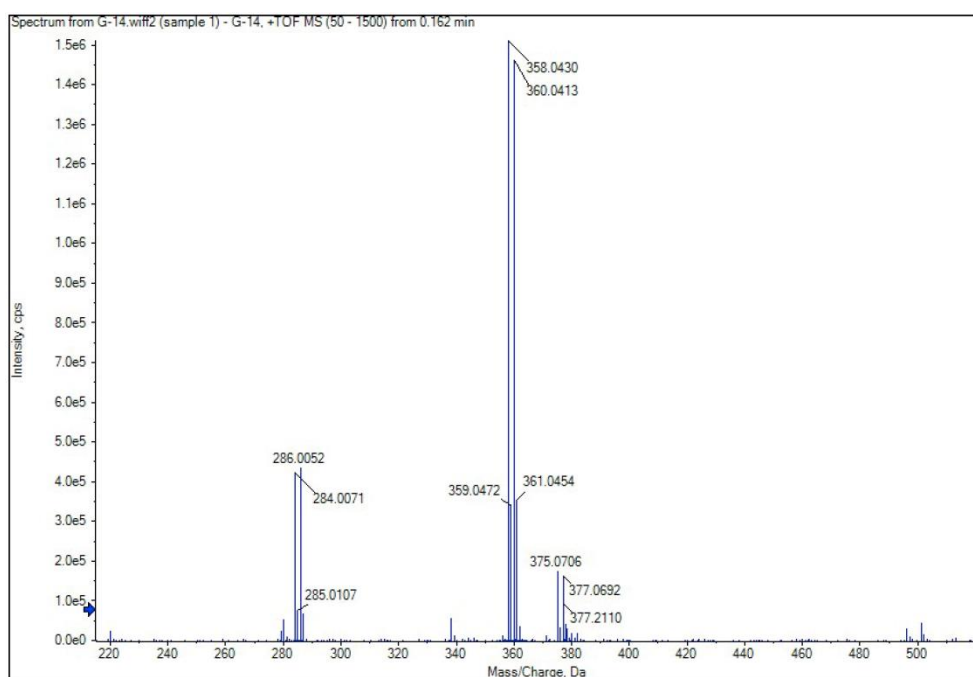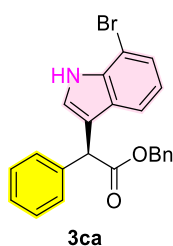

**Benzyl (S)-2-(7-bromo-1H-indol-3-yl)-2-phenylacetate (3ca)** was prepared as a colorless oil according to the General Procedure B (eluent: hexanes/ EtOAc = 10:1, 55.8 mg, 67% yield, 95% ee).

$[\alpha]_D^{25}$ : +26.9 ( $c = 1.5$ , CH<sub>2</sub>Cl<sub>2</sub>). HPLC analysis of the product: Daicel CHIRALPAK<sup>®</sup> IC column; 10% *i*-PrOH in *n*-hexane; 1.0 mL/min; retention times: 5.9 min (major), 6.9 min (minor).

<sup>1</sup>H NMR (400 MHz, CDCl<sub>3</sub>)  $\delta$  8.27 (s, 1H), 7.39 – 7.37 (m, 2H), 7.32 – 7.21 (m, 10H), 7.20 – 7.19 (m, 1H), 6.88 (t,  $J = 7.8$  Hz, 1H), 5.26 (s, 1H), 5.18 (q,  $J = 12.4$  Hz, 2H) ppm.

<sup>13</sup>C NMR (100 MHz, CDCl<sub>3</sub>)  $\delta$  172.5, 138.1, 135.7, 135.0, 128.7, 128.6, 128.5, 128.32, 128.26, 127.8, 127.5, 124.7, 123.9, 121.0, 118.4, 114.8, 104.8, 67.0, 49.1 ppm.

HRMS (ESI+) Calcd for C<sub>23</sub>H<sub>19</sub>BrNO<sub>2</sub> [M+H]<sup>+</sup>: 420.0594, found: 420.0587.

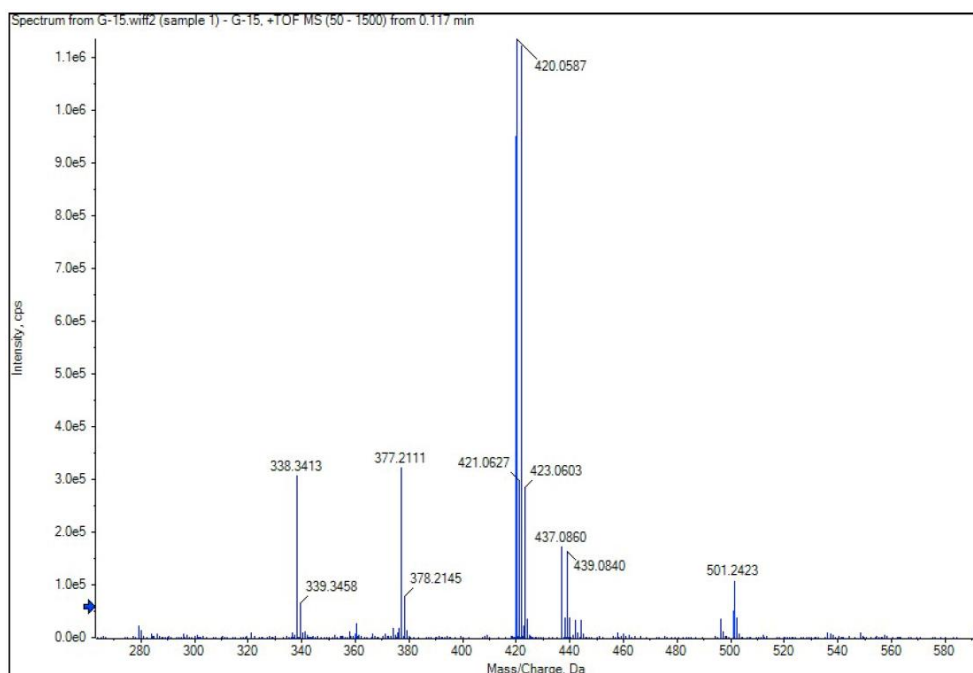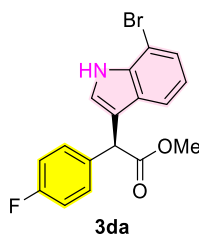

**Methyl (S)-2-(7-bromo-1H-indol-3-yl)-2-(4-fluorophenyl)acetate (3da)** was prepared as a yellow oil according to the General Procedure B (eluent: hexanes/EtOAc = 10:1, 51.4 mg, 71% yield, 96% ee).

$[\alpha]_D^{25}$ : +27.7 ( $c = 1.0$ ,  $\text{CH}_2\text{Cl}_2$ ). HPLC analysis of the product: Daicel CHIRALPAK® AD-H column; 10% *i*-PrOH in *n*-hexane; 1.0 mL/min; retention times: 22.2 min (major), 24.7 min (minor).

$^1\text{H NMR}$  (300 MHz,  $\text{CDCl}_3$ )  $\delta$  8.27 (s, 1H), 7.28 – 7.15 (m, 5H), 6.93 – 6.82 (m, 3H), 5.12 (s, 1H), 3.66 (s, 3H) ppm.

$^{13}\text{C NMR}$  (75 MHz,  $\text{CDCl}_3$ )  $\delta$  173.0, 162.1 (d,  $^1J_{\text{C-F}} = 244.5$  Hz), 135.0, 134.0 (d,  $^4J_{\text{C-F}} = 3.2$  Hz), 130.0 (d,  $^3J_{\text{C-F}} = 8.0$  Hz), 127.6, 124.8, 123.8, 121.1, 118.3, 115.5 (d,  $^2J_{\text{C-F}} = 21.3$  Hz), 114.7, 104.9, 52.5, 48.2 ppm.

$^{19}\text{F NMR}$  (282 MHz,  $\text{CDCl}_3$ )  $\delta$  -115.1 ppm.

**HRMS** (ESI+) Calcd for  $\text{C}_{17}\text{H}_{14}\text{BrFNO}_2$   $[\text{M}+\text{H}]^+$ : 362.0186, found: 362.0183.



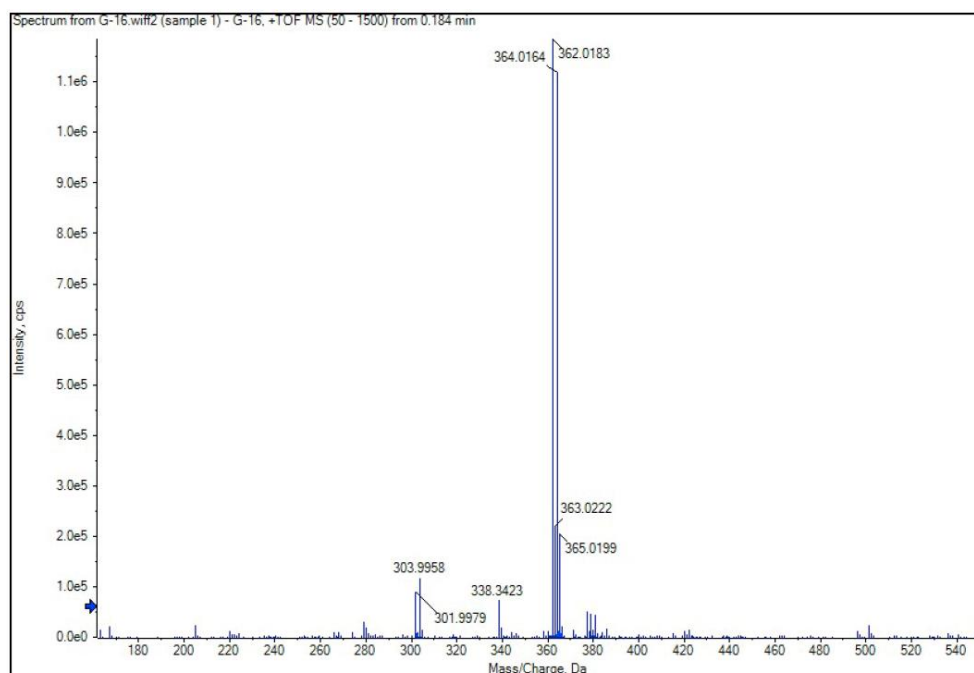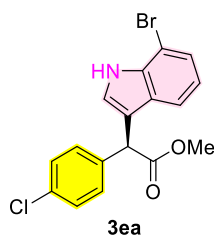

**Methyl (S)-2-(7-bromo-1H-indol-3-yl)-2-(4-chlorophenyl)acetate (3ea)** was prepared as a colorless oil according to the General Procedure B (eluent: hexanes/EtOAc = 10:1, 56.6 mg, 75% yield, 96% ee).

$[\alpha]_{\text{D}}^{25}$ : +26.6 ( $c = 1.0$ ,  $\text{CH}_2\text{Cl}_2$ ). HPLC analysis of the product: Daicel CHIRALPAK<sup>®</sup> AD-H column; 15% *i*-PrOH in *n*-hexane; 1.0 mL/min; retention times: 14.8 min (major), 16.3 min (minor).

<sup>1</sup>H NMR (300MHz,  $\text{CDCl}_3$ )  $\delta$  8.26 (s, 1H), 7.26 – 7.17 (m, 7H), 6.85 (t,  $J = 7.8$  Hz, 1H), 5.11 (s, 1H), 3.67 (s, 3H) ppm.

<sup>13</sup>C NMR (75 MHz,  $\text{CDCl}_3$ )  $\delta$  172.8, 136.7, 135.0, 133.4, 129.8, 128.8, 127.5, 124.9, 123.8, 121.1, 118.3, 114.4, 104.9, 52.6, 48.3 ppm.

HRMS (ESI+) Calcd for  $\text{C}_{17}\text{H}_{14}\text{BrClNO}_2$   $[\text{M}+\text{H}]^+$ : 377.9891, found: 377.9888.

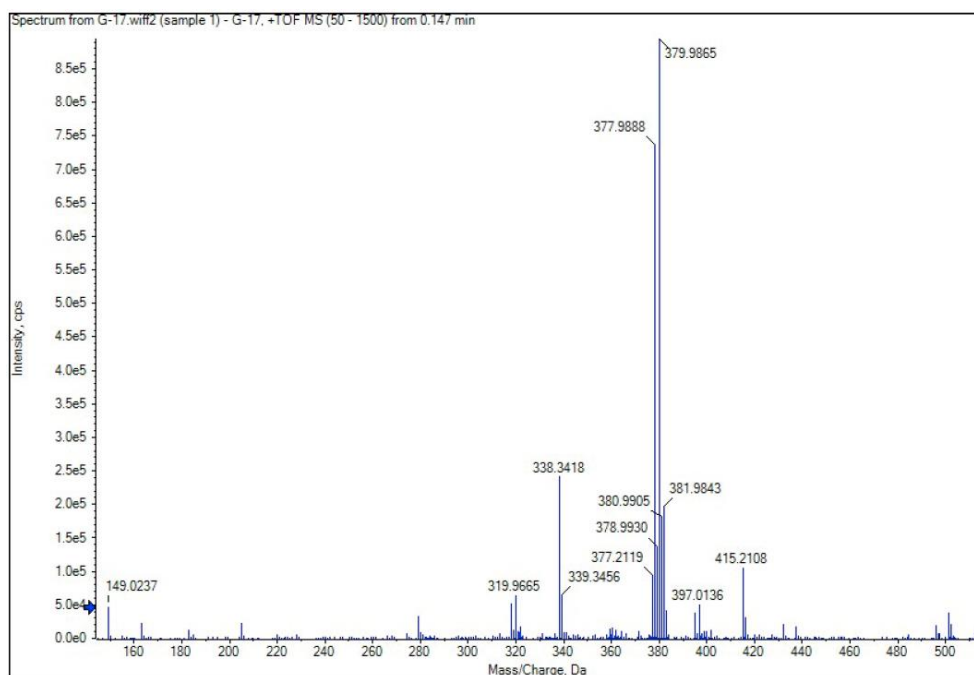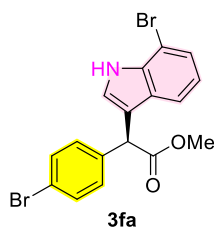

**Methyl (S)-2-(7-bromo-1H-indol-3-yl)-2-(4-bromophenyl)acetate (3fa)** was prepared as a white solid according to the General Procedure B (eluent: hexanes/EtOAc = 10:1, 66.8 mg, 79% yield, 94% ee).

$[\alpha]_{\text{D}}^{25}$ : +23.9 ( $c = 1.0$ ,  $\text{CH}_2\text{Cl}_2$ ). HPLC analysis of the product: Daicel CHIRALPAK<sup>®</sup> AD-H column; 15% *i*-PrOH in *n*-hexane; 1.0 mL/min; retention times: 15.9 min (major), 17.2 min (minor).

<sup>1</sup>H NMR (300 MHz,  $\text{CDCl}_3$ )  $\delta$  8.28 (s, 1H), 7.33 (d,  $J = 7.8$  Hz, 2H), 7.24 (d,  $J = 7.8$  Hz, 2H), 7.16 (d,  $J = 8.6$  Hz, 3H), 6.85 (t,  $J = 7.8$  Hz, 1H), 5.09 (s, 1H), 3.66 (s, 3H) ppm.

<sup>13</sup>C NMR (75 MHz,  $\text{CDCl}_3$ )  $\delta$  172.7, 137.2, 135.0, 131.8, 130.2, 127.5, 124.9, 123.9, 121.5, 121.1, 118.3, 114.3, 104.9, 52.6, 48.4 ppm.

HRMS (ESI+) Calcd for  $\text{C}_{17}\text{H}_{14}\text{Br}_2\text{NO}_2$   $[\text{M}+\text{H}]^+$ : 421.9386, found: 421.9385.

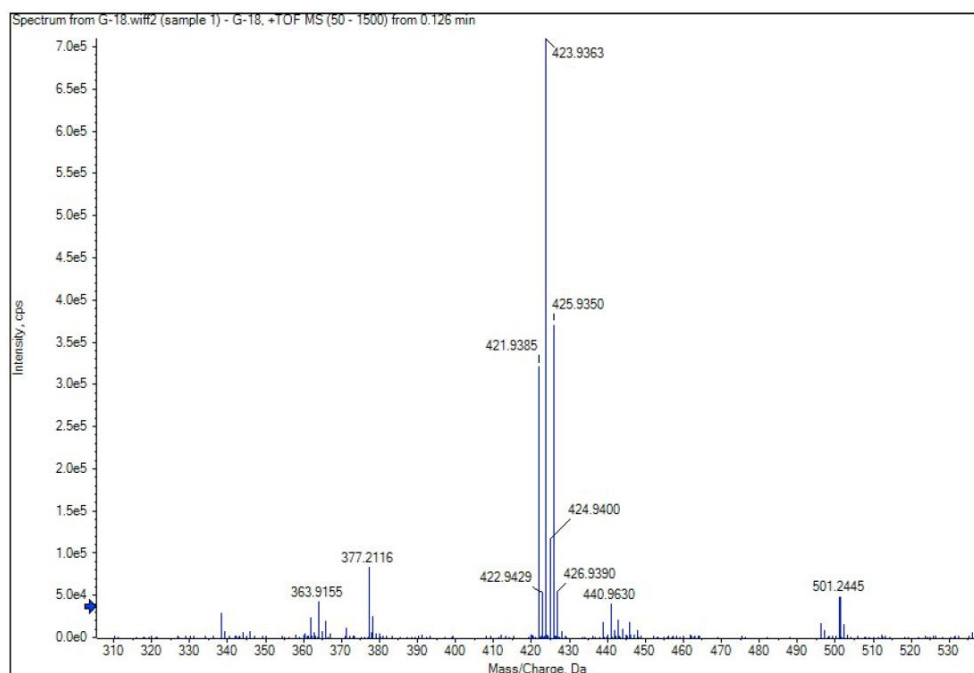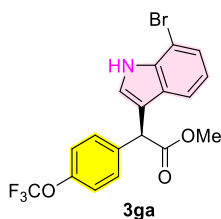

**Methyl (S)-2-(7-bromo-1H-indol-3-yl)-2-(4-(trifluoromethoxy)phenyl)acetate (3ga)** was prepared as a colorless oil according to the General Procedure B (eluent: hexanes/EtOAc = 10:1, 58.2 mg, 68% yield, 97% ee).

$[\alpha]_D^{25}$ : +38.8 ( $c = 1.0$ ,  $\text{CH}_2\text{Cl}_2$ ). HPLC analysis of the product: Daicel CHIRALPAK® AD-H column; 10% *i*-PrOH in *n*-hexane; 1.0 mL/min; retention times: 12.6 min (major), 16.8 min (minor).

$^1\text{H NMR}$  (400 MHz,  $\text{CDCl}_3$ )  $\delta$  8.30 (s, 1H), 7.34 – 7.32 (m, 2H), 7.27 – 7.25 (m, 2H), 7.190 – 7.185 (m, 1H), 7.08 – 7.06 (m, 2H), 6.88 (t,  $J = 7.8$  Hz, 1H), 5.15 (s, 1H), 3.67 (s, 3H) ppm.

$^{13}\text{C NMR}$  (100 MHz,  $\text{CD}_2\text{Cl}_2$ )  $\delta$  172.8, 148.5, 136.9, 135.0, 129.8, 127.5, 124.9, 123.9, 121.14, 121.08, 120.5 (q,  $^1J_{\text{C-F}} = 266.6$  Hz), 118.2, 114.3, 105.0, 52.6, 48.3 ppm.

$^{19}\text{F NMR}$  (376 MHz,  $\text{CDCl}_3$ )  $\delta$  –57.8 ppm.

**HRMS** (ESI+) Calcd for  $\text{C}_{18}\text{H}_{14}\text{BrF}_3\text{NO}_3$   $[\text{M}+\text{H}]^+$ : 428.0104, found: 428.0100.

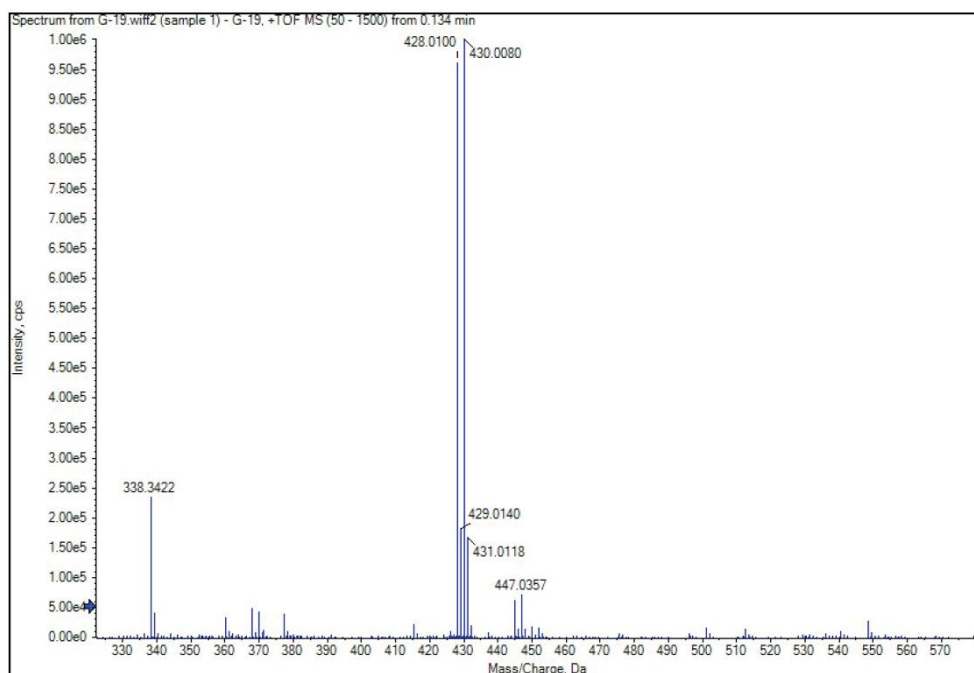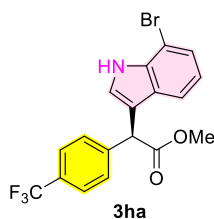

**Methyl (S)-2-(7-bromo-1H-indol-3-yl)-2-(4-(trifluoromethyl)phenyl)acetate (3ha)** was prepared as a yellow solid according to the General Procedure B (eluent: hexane /EtOAc = 10:1, 42.8 mg, 52% yield, 96% ee).

$[\alpha]_{\text{D}}^{25}$ : +18.2 ( $c = 1.0$ ,  $\text{CH}_2\text{Cl}_2$ ). HPLC analysis of the product: Daicel CHIRALPAK<sup>®</sup> AD-H column; 10% *i*-PrOH in *n*-hexane; 1.0 mL/min; retention times: 14.2 min (major), 17.9 min (minor).

<sup>1</sup>H NMR (300 MHz,  $\text{CDCl}_3$ )  $\delta$  8.29 (s, 1H), 7.50 – 7.41 (m, 4H), 7.27 – 7.22 (m, 3H), 6.87 (t,  $J = 7.7$  Hz, 1H), 5.21 (s, 1H), 3.68 (s, 3H) ppm.

<sup>13</sup>C NMR (75 MHz,  $\text{CDCl}_3$ )  $\delta$  172.5, 142.2, 135.0, 129.7 ( $q$ ,  $^2J_{\text{C-F}} = 32.3$  Hz), 128.8, 127.5, 125.6 ( $q$ ,  $^4J_{\text{C-F}} = 3.8$  Hz), 124.9, 124.1 ( $q$ ,  $^1J_{\text{C-F}} = 270.2$  Hz), 123.9, 121.2, 118.2, 114.0, 105.0, 52.6, 48.7 ppm.

<sup>19</sup>F NMR (282 MHz,  $\text{CDCl}_3$ )  $\delta$  –62.5 ppm.

HRMS (ESI+) Calcd for  $\text{C}_{18}\text{H}_{14}\text{BrF}_3\text{NO}_2$   $[\text{M}+\text{H}]^+$ : 412.0155, found: 412.0153.

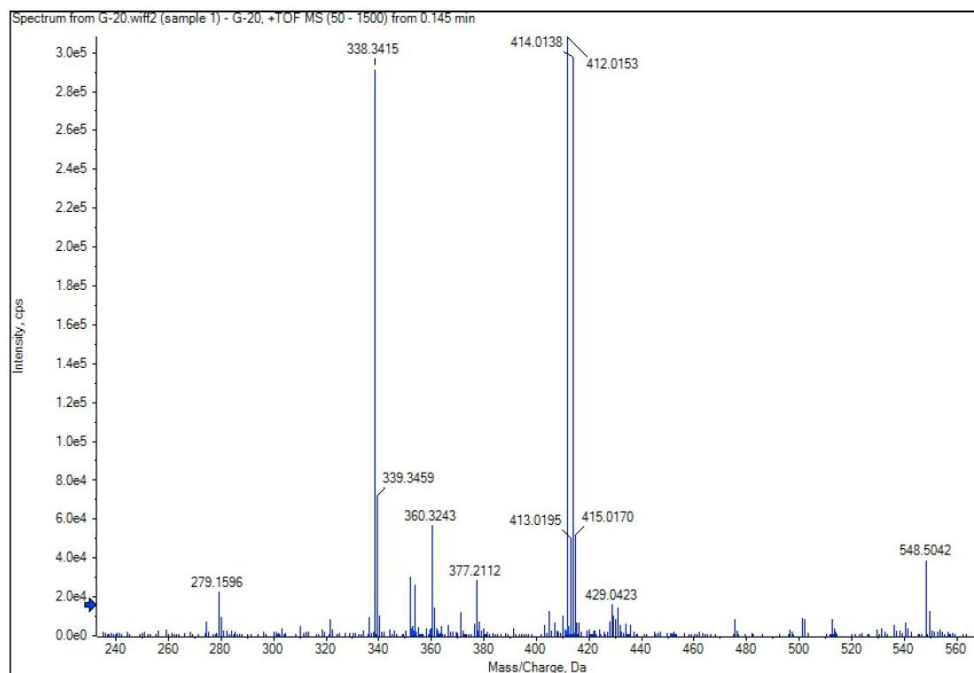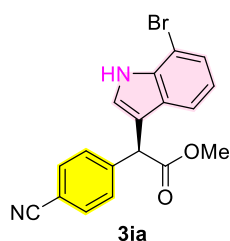

**Methyl (S)-2-(7-bromo-1H-indol-3-yl)-2-(4-cyanophenyl)acetate (3ia)** was prepared as a yellow solid according to the General Procedure B (eluent: hexanes/EtOAc = 5:1, 44.2 mg, 60% yield, 94% ee).

$[\alpha]_{\text{D}}^{25}$ : +62.5 ( $c = 1.0$ ,  $\text{CH}_2\text{Cl}_2$ ). HPLC analysis of the product: Daicel CHIRALPAK® AD-H column; 15% *i*-PrOH in *n*-hexane; 1.0 mL/min; retention times: 26.7 min (minor), 33.1 min (major).

$^1\text{H}$  NMR (300 MHz,  $\text{CDCl}_3$ )  $\delta$  8.38 (s, 1H), 7.52 – 7.50 (m, 2H), 7.42 – 7.39 (m, 2H), 7.28 – 7.17 (m, 3H), 6.87 (t,  $J = 7.8$  Hz, 1H), 5.20 (s, 1H), 3.69 (s, 3H) ppm.

$^{13}\text{C}$  NMR (75 MHz,  $\text{CDCl}_3$ )  $\delta$  172.1, 143.6, 135.0, 132.4, 129.3, 127.3, 125.0, 124.0, 121.3, 118.7, 118.1, 113.4, 111.4, 105.0, 52.7, 48.9 ppm.

HRMS (ESI+) Calcd for  $\text{C}_{18}\text{H}_{14}\text{BrN}_2\text{O}_2$   $[\text{M}+\text{H}]^+$ : 369.0233, found: 369.0237.

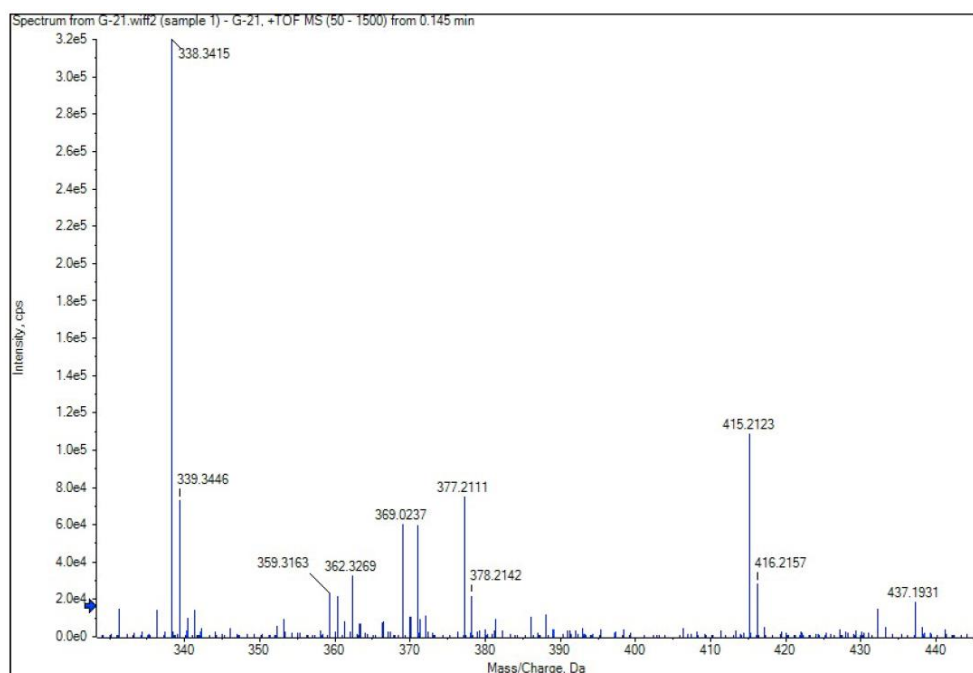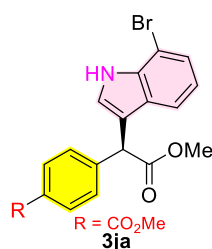

**Methyl (S)-4-(1-(7-bromo-1H-indol-3-yl)-2-methoxy-2-oxoethyl)benzoate (3ja)**

was prepared as a yellow oil according to the General Procedure B (eluent: hexanes/EtOAc = 5:1, 46.7 mg, 58% yield, 96% ee).

$[\alpha]_D^{25}$ : +13.2 ( $c = 1.0$ ,  $\text{CH}_2\text{Cl}_2$ ). HPLC analysis of the product: Daicel CHIRALPAK<sup>®</sup> IC column; 10% *i*-PrOH in *n*-hexane; 1.0 mL/min; retention times: 17.3 min (major), 20.4 min (minor).

<sup>1</sup>H NMR (300 MHz,  $\text{CDCl}_3$ )  $\delta$  8.43 (s, 1H), 7.98 (d,  $J = 8.1$  Hz, 2H), 7.46 (d,  $J = 8.1$  Hz, 2H), 7.34 – 7.25 (m, 3H), 6.93 (t,  $J = 7.8$  Hz, 1H), 5.28 (s, 1H), 3.89 (s, 3H), 3.75 (s, 3H) ppm.

<sup>13</sup>C NMR (75 MHz,  $\text{CDCl}_3$ )  $\delta$  172.5, 166.9, 143.3, 135.0, 130.0, 129.3, 128.5, 127.5, 124.9, 124.0, 121.1, 118.2, 114.1, 104.9, 52.6, 52.2, 48.9 ppm.

HRMS (CI+) Calcd for  $\text{C}_{19}\text{H}_{17}\text{BrNO}_4$   $[\text{M}+\text{H}]^+$ : 402.0335, found: 402.0326.

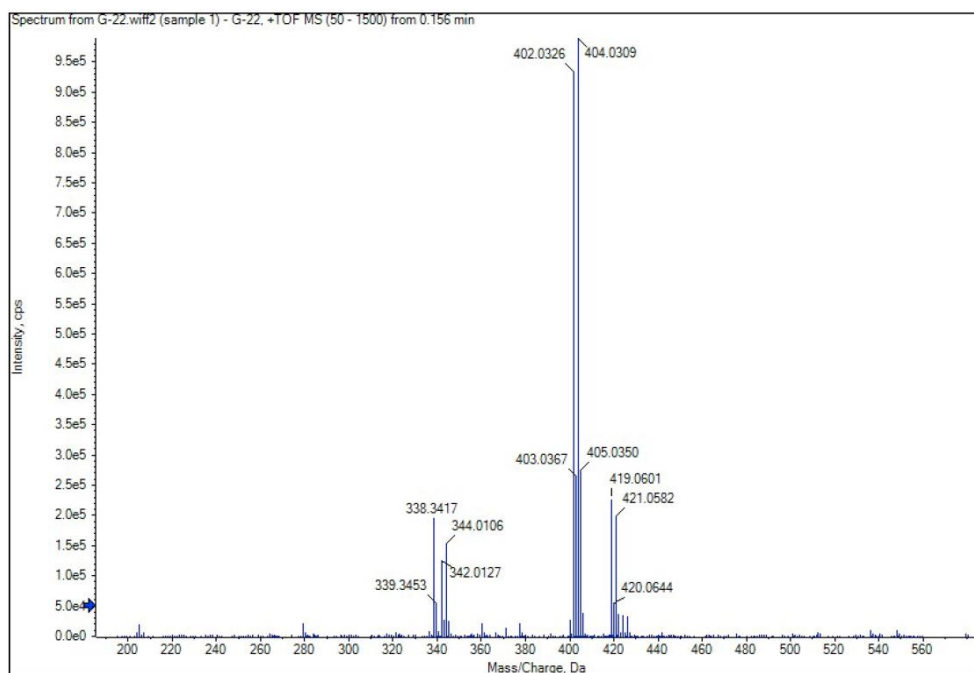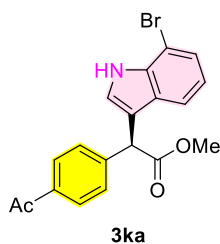

**Methyl (S)-2-(4-acetylphenyl)-2-(7-bromo-1H-indol-3-yl)acetate (3ka)** was prepared as a yellow solid according to the General Procedure B (eluent: hexanes/EtOAc = 5:1, 43.8 mg, 57% yield, 92% ee).

$[\alpha]_D^{25}$ : +12.6 ( $c = 1.0$ ,  $\text{CH}_2\text{Cl}_2$ ). HPLC analysis of the product: Daicel CHIRALPAK<sup>®</sup> IC column; 15% *i*-PrOH in *n*-hexane; 1.0 mL/min; retention times: 20.4 min (major), 24.5 min (minor).

<sup>1</sup>H NMR (300 MHz,  $\text{CDCl}_3$ )  $\delta$  8.42 (s, 1H), 7.82 (d,  $J = 8.1$  Hz, 2H), 7.40 (d,  $J = 8.1$  Hz, 2H), 7.26 – 7.17 (m, 3H), 6.85 (t,  $J = 7.7$  Hz, 1H), 5.21 (s, 1H), 3.68 (s, 3H), 2.48 (s, 3H) ppm.

<sup>13</sup>C NMR (75 MHz,  $\text{CDCl}_3$ )  $\delta$  197.8, 172.5, 143.5, 136.3, 135.0, 128.73, 128.70, 127.5, 124.9, 124.0, 121.1, 118.2, 114.0, 105.0, 52.6, 48.9, 26.7 ppm.

HRMS (ESI+) Calcd for  $\text{C}_{19}\text{H}_{17}\text{BrNO}_3$   $[\text{M}+\text{H}]^+$ : 386.0386, found: 386.0379.

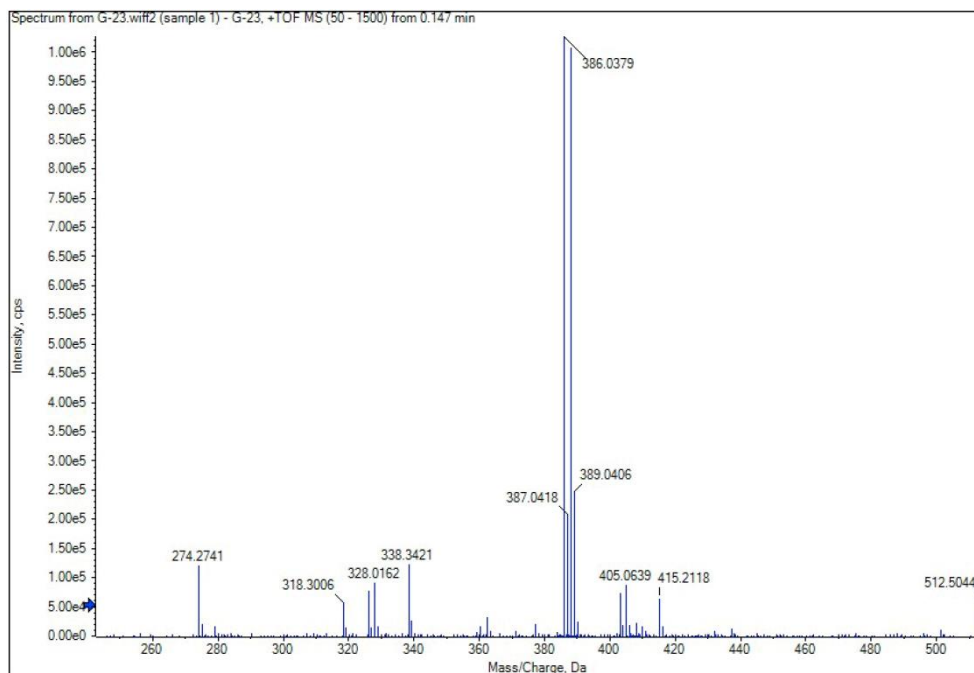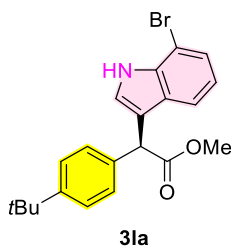

**Methyl (S)-2-(7-bromo-1H-indol-3-yl)-2-(4-(tert-butyl)phenyl)acetate (3a)**

was prepared as a yellow oil according to the General Procedure B (eluent: hexanes/EtOAc = 10:1, 52.2 mg, 65% yield, 85% ee).

$[\alpha]_D^{25}$ : +4.5 ( $c = 1.0$ ,  $\text{CH}_2\text{Cl}_2$ ). HPLC analysis of the product: Daicel CHIRALPAK® AD-H column; 15% *i*-PrOH in *n*-hexane; 1.0 mL/min; retention times: 8.3 min (major), 14.8 min (minor).

$^1\text{H NMR}$  (300 MHz,  $\text{CDCl}_3$ )  $\delta$  8.21 (s, 1H), 7.33 (d,  $J = 7.9$  Hz, 1H), 7.24 – 7.14 (m, 6H), 6.86 (t,  $J = 7.8$  Hz, 1H), 5.12 (s, 1H), 3.65 (s, 3H), 1.20 (s, 9H) ppm.

$^{13}\text{C NMR}$  (75 MHz,  $\text{CDCl}_3$ )  $\delta$  173.4, 150.2, 135.1, 135.0, 128.0, 127.8, 125.6, 124.6, 123.9, 120.9, 118.4, 115.2, 104.9, 52.4, 48.5, 34.5, 31.4 ppm.

**HRMS** (ESI+) Calcd for  $\text{C}_{21}\text{H}_{23}\text{BrNO}_2$   $[\text{M}+\text{H}]^+$ : 400.0907, found: 400.0903.



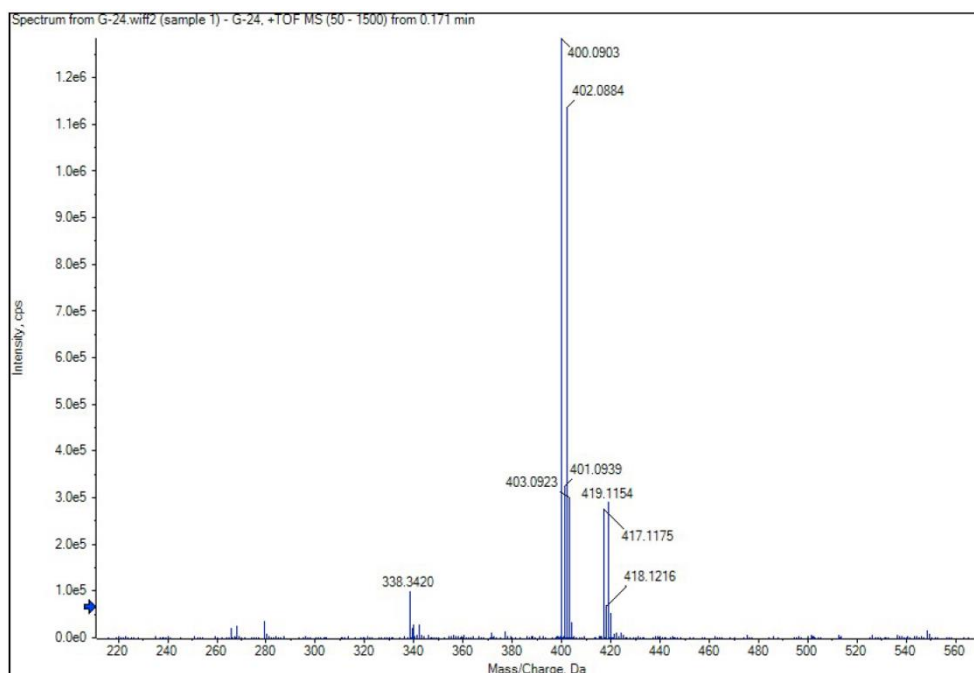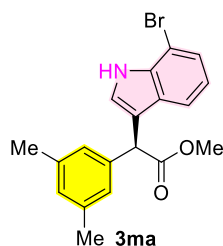

**Methyl (S)-2-(7-bromo-1H-indol-3-yl)-2-(3,5-dimethylphenyl)acetate (3ma)** was prepared as a yellow oil according to the General Procedure B (eluent: hexanes/EtOAc = 10:1, 54.7 mg, 74% yield, 95% ee).

$[\alpha]_{\text{D}}^{25}$ : +15.3 ( $c = 1.0$ ,  $\text{CH}_2\text{Cl}_2$ ). HPLC analysis of the product: Daicel CHIRALPAK<sup>®</sup> AD-H column; 15% *i*-PrOH in *n*-hexane; 1.0 mL/min; retention times: 10.7 min (major), 15.7 min (minor).

<sup>1</sup>H NMR (300 MHz,  $\text{CDCl}_3$ )  $\delta$  8.21 (s, 1H), 7.32 – 7.15 (m, 3H), 6.92 – 6.81 (m, 4H), 5.06 (s, 1H), 3.65 (s, 3H), 2.18 (s, 6H) ppm.

<sup>13</sup>C NMR (75 MHz,  $\text{CDCl}_3$ )  $\delta$  173.4, 138.2, 138.0, 134.9, 129.2, 127.9, 126.1, 124.6, 123.9, 120.9, 118.3, 115.1, 104.8, 52.4, 48.8, 21.4 ppm.

HRMS (ESI+) Calcd for  $\text{C}_{19}\text{H}_{19}\text{BrNO}_2$   $[\text{M}+\text{H}]^+$ : 372.0594, found: 372.0592.

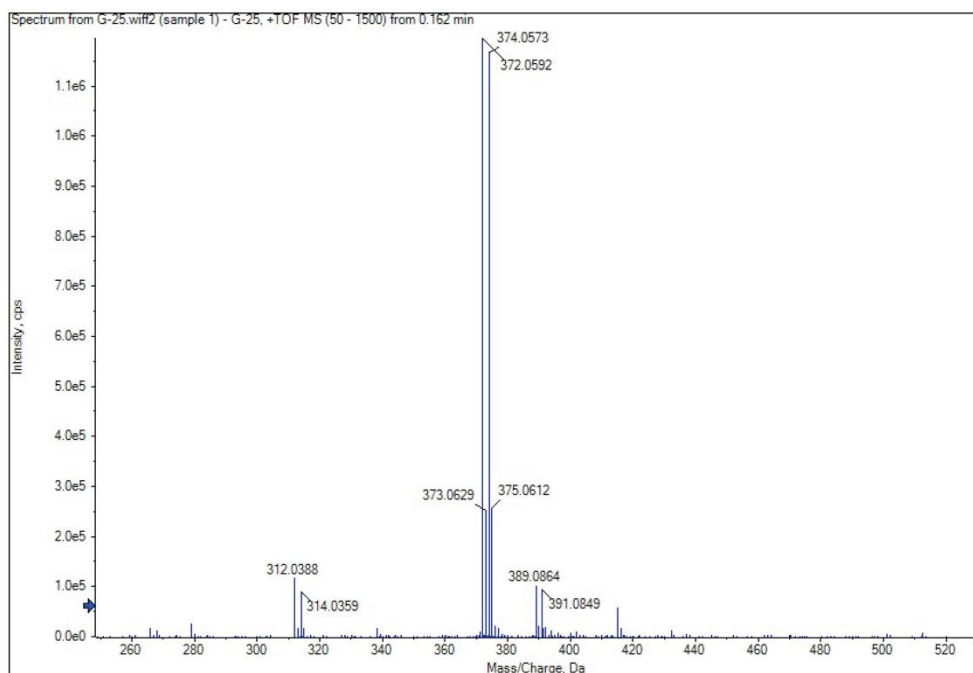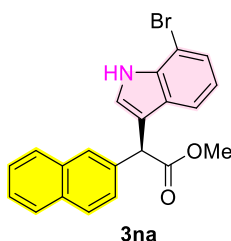

**Methyl (S)-2-(7-bromo-1H-indol-3-yl)-2-(naphthalen-2-yl)acetate (3na)** was prepared as a yellow solid according to the General Procedure B (eluent: hexanes/EtOAc = 10:1, 52.8 mg, 67% yield, 93% ee).

$[\alpha]_D^{25}$ : +24.2 ( $c = 1.0$ ,  $\text{CH}_2\text{Cl}_2$ ). HPLC analysis of the product: Daicel CHIRALPAK<sup>®</sup> IC column; 10% *i*-PrOH in *n*-hexane; 1.0 mL/min; retention times: 7.4 min (major), 10.0 min (minor).

<sup>1</sup>H NMR (300 MHz,  $\text{CDCl}_3$ )  $\delta$  8.23 (s, 1H), 7.75 – 7.68 (m, 4H), 7.44 – 7.19 (m, 6H), 6.82 (t,  $J = 7.8$  Hz, 1H), 5.30 (s, 1H), 3.67 (s, 3H) ppm.

<sup>13</sup>C NMR (75 MHz,  $\text{CDCl}_3$ )  $\delta$  173.1, 135.6, 135.0, 133.4, 132.7, 128.4, 128.0, 127.8, 127.7, 127.2, 126.5, 126.2, 126.0, 124.7, 124.1, 121.0, 118.4, 114.9, 104.9, 52.5, 49.1 ppm.

HRMS (ESI+) Calcd for  $\text{C}_{21}\text{H}_{17}\text{BrNO}_2$   $[\text{M}+\text{H}]^+$ : 394.0437, found: 394.0429.

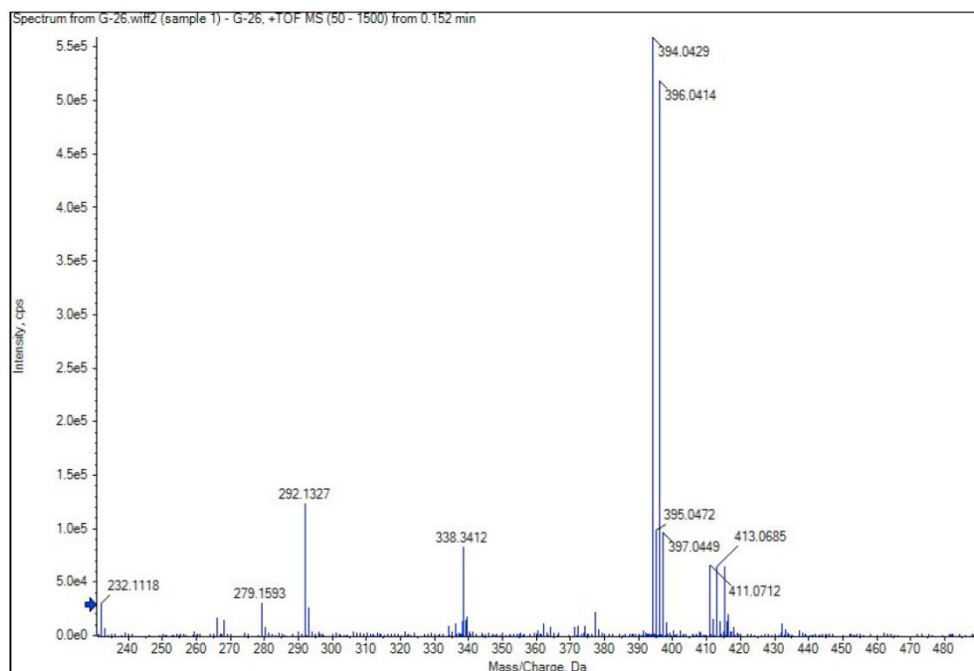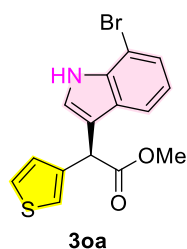

**Methyl 2-(7-bromo-1H-indol-3-yl)-2-(thiophen-3-yl)acetate (3oa)** was prepared as a yellow solid according to the General Procedure B (eluent: hexanes/EtOAc = 10:1, 49.2 mg, 70% yield, 92% ee).

$[\alpha]_D^{25}$ : +8.2 ( $c = 1.0$ ,  $\text{CH}_2\text{Cl}_2$ ). HPLC analysis of the product: Daicel CHIRALPAK® AD-H column; 10% *i*-PrOH in *n*-hexane; 1.0 mL/min; retention times: 21.1 min (major), 23.2 min (minor).

$^1\text{H NMR}$  (400 MHz,  $\text{CDCl}_3$ )  $\delta$  8.25 (s, 1H), 7.38 (d,  $J = 8.0$  Hz, 1H), 7.26 (d,  $J = 7.5$  Hz, 1H), 7.20 – 7.18 (m, 1H), 7.112 – 7.107 (m, 2H), 7.01 – 7.00 (m, 1H), 6.89 (t,  $J = 7.8$  Hz, 1H), 5.22 (s, 1H), 3.67 (s, 3H) ppm.

$^{13}\text{C NMR}$  (100 MHz,  $\text{CDCl}_3$ )  $\delta$  172.9, 138.4, 135.0, 127.9, 127.6, 125.9, 124.7, 123.8, 122.7, 121.1, 118.5, 114.8, 104.9, 52.5, 44.5 ppm.

**HRMS** (ESI+) Calcd for  $\text{C}_{15}\text{H}_{13}\text{BrNO}_2\text{S}$   $[\text{M}+\text{H}]^+$ : 349.9845, found: 349.9840.

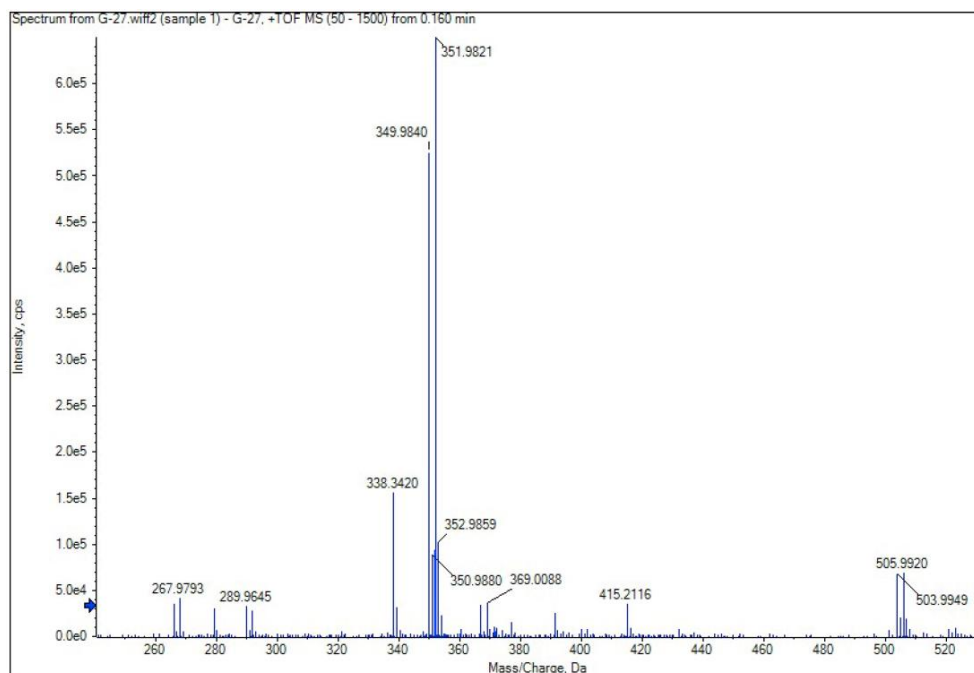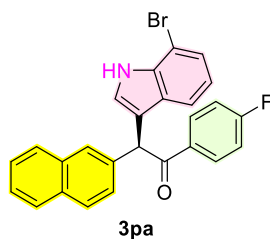

**(S)-2-(7-Bromo-1H-indol-3-yl)-1-(4-fluorophenyl)-2-(naphthalen-2-yl)ethan-1-one (3pa)** was prepared as a yellow oil according to the General Procedure B (eluent: hexanes/EtOAc = 5:1, 60.7 mg, 66% yield, 86% ee).

$[\alpha]_{\text{D}}^{25}$ : +185.3 ( $c = 1.0$ ,  $\text{CH}_2\text{Cl}_2$ ). HPLC analysis of the product: Daicel CHIRALPAK<sup>®</sup> IC column; 10% *i*-PrOH in *n*-hexane; 1.0 mL/min; retention times: 8.3 min (major), 9.2 min (minor).

<sup>1</sup>H NMR (400 MHz,  $\text{CDCl}_3$ )  $\delta$  8.58 (s, 1H), 8.36 (s, 1H), 8.07 – 8.04 (m, 1H), 7.88 – 7.80 (m, 3H), 7.57 – 7.43 (m, 3H), 7.34 – 7.31 (m, 3H), 7.04 – 6.94 (m, 4H), 6.37 (s, 1H) ppm.

<sup>13</sup>C NMR (100 MHz,  $\text{CDCl}_3$ )  $\delta$  198.1, 162.1 (d,  $^1J_{\text{C-F}} = 244.1$  Hz), 135.6, 135.2, 134.4 (d,  $^4J_{\text{C-F}} = 3.1$  Hz), 133.8, 132.5, 130.64 (d,  $^3J_{\text{C-F}} = 8.1$  Hz), 130.60, 129.8, 128.8, 128.7, 127.8, 127.6, 126.9, 125.0, 124.5, 124.4, 121.2, 118.2, 115.6 (d,  $^2J_{\text{C-F}} = 21.1$  Hz), 115.5, 105.1, 50.1 ppm.

$^{19}\text{F}$  NMR (376 MHz,  $\text{CDCl}_3$ )  $\delta$  -115.4 ppm.

HRMS (ESI+) Calcd for  $\text{C}_{26}\text{H}_{18}\text{BrFNO}$   $[\text{M}+\text{H}]^+$ : 458.0550, found: 458.0555.

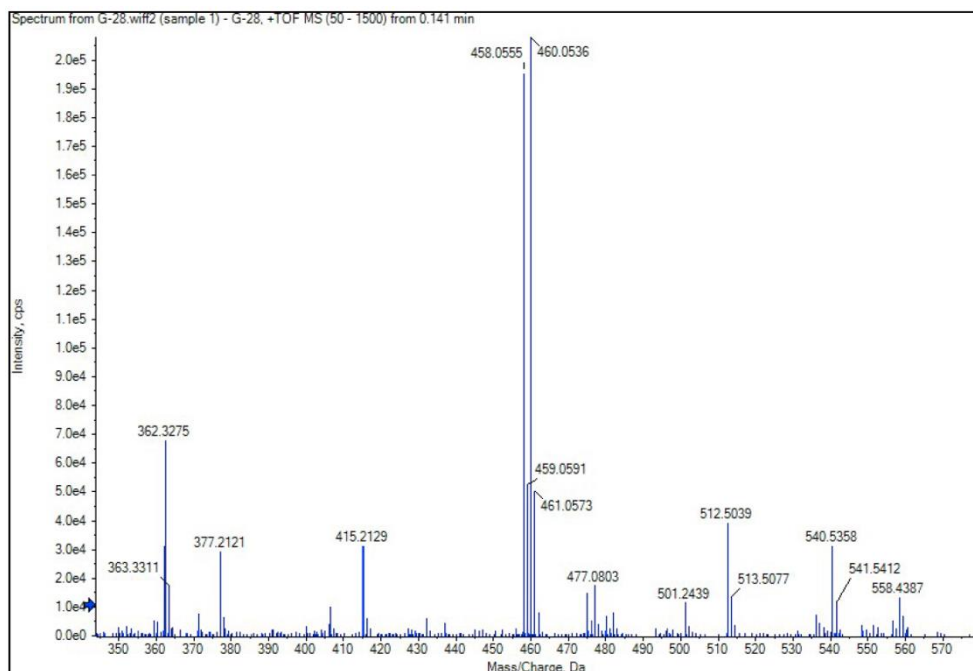

### General Procedure C.

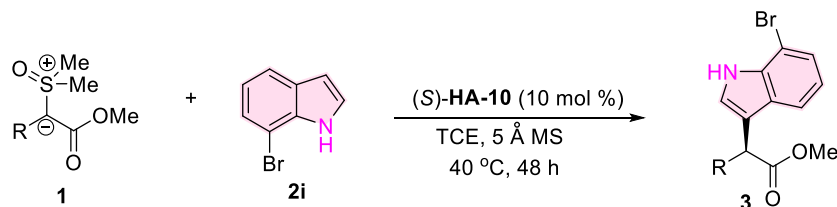

In an oven-dried 4-mL vial equipped with a magnetic stirring bar, bioactive molecule derived sulfoxonium ylide **1** (0.2 mmol, 1.0 equiv), CPA catalyst (*S*)-**HA-10** (14.6 mg, 10 mol %), and 5 Å molecular sieves (100 mg) were combined. Subsequently, 1.0 mL of TCE was added, followed by the addition of indole **2i** (43.1 mg, 0.22 mmol, 1.1 equiv). The resulting mixture was stirred at 40 °C and monitored by TLC. After completion (48 h), the mixture was directly subjected to flash column chromatography on silica gel (eluent: hexanes/ethyl acetate = 10:1 to 5:1) to afford the desired product **3**.

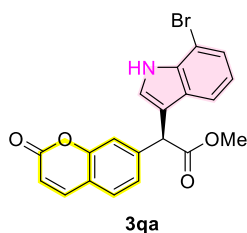

**Methyl (S)-2-(7-bromo-1H-indol-3-yl)-2-(2-oxo-2H-chromen-7-yl)acetate (3qa)**

was prepared as a yellow oil according to the General Procedure C (eluent: hexanes/EtOAc = 3:1, 42.3 mg, 51% yield, 92% ee).

$[\alpha]_D^{25}$ : +27.6 ( $c = 1.0$ ,  $\text{CH}_2\text{Cl}_2$ ). HPLC analysis of the product: Daicel CHIRALPAK<sup>®</sup> IC column; 25% *i*-PrOH in *n*-hexane; 1.0 mL/min; retention times: 27.5 min (major), 31.8 min (minor).

<sup>1</sup>H NMR (300 MHz,  $\text{CDCl}_3$ )  $\delta$  8.45 (s, 1H), 7.56 (d,  $J = 9.5$  Hz, 1H), 7.33 – 7.18 (m, 6H), 6.86 (t,  $J = 7.8$  Hz, 1H), 6.30 (d,  $J = 9.5$  Hz, 1H), 5.23 (s, 1H), 3.69 (s, 3H) ppm.

<sup>13</sup>C NMR (75 MHz,  $\text{CDCl}_3$ )  $\delta$  172.2, 160.7, 154.1, 143.1, 142.9, 135.0, 128.0, 127.4, 125.0, 124.7, 124.0, 121.2, 118.1, 118.0, 116.8, 116.6, 113.5, 105.0, 52.7, 48.8 ppm.

HRMS (ESI+) Calcd for  $\text{C}_{20}\text{H}_{15}\text{BrNO}_4$   $[\text{M}+\text{H}]^+$ : 412.0179, found: 412.0173.

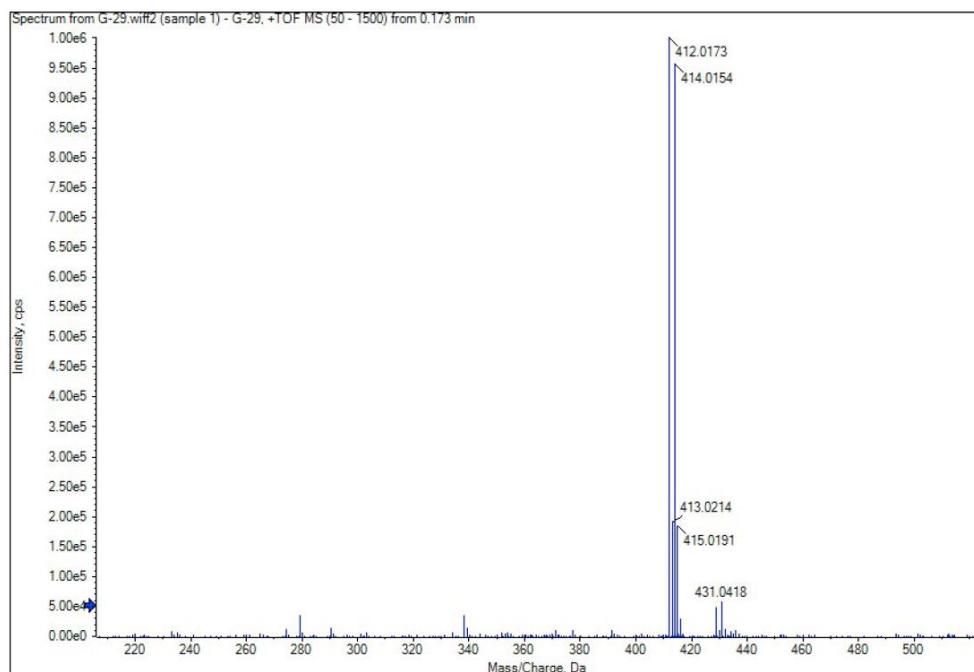

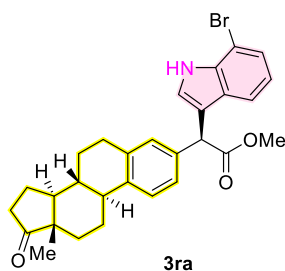

**Methyl (S)-2-(7-bromo-1H-indol-3-yl)-2-((8R,9S,13S,14S)-13-methyl-17-oxo-7,8,9,11,12,13,14,15,16,17-decahydro-6H-cyclopenta[a]phenanthren-3-yl)acetate (3ra)** was prepared as a yellow solid according to the General Procedure C (eluent: hexanes/EtOAc = 5:1, 52 mg, 50% yield, >20 : 1 d.r.).

$^1\text{H NMR}$  (400 MHz,  $\text{CDCl}_3$ )  $\delta$  8.39 (s, 1H), 7.41 (d,  $J = 8.0$  Hz, 1H), 7.32 – 7.29 (m, 2H), 7.25 – 7.16 (m, 2H), 7.11 (s, 1H), 6.94 (t,  $J = 7.8$  Hz, 1H), 5.17 (s, 1H), 3.74 (s, 3H), 2.87 – 2.84 (m, 2H), 2.53 – 2.46 (m, 1H), 2.40 – 2.36 (m, 1H), 2.28 – 2.22 (m, 1H), 2.17 – 1.93 (m, 4H), 1.63 – 1.37 (m, 6H), 0.88 (s, 3H) ppm.

$^{13}\text{C NMR}$  (100 MHz,  $\text{CDCl}_3$ )  $\delta$  221.1, 173.3, 138.9, 136.8, 135.6, 134.9, 128.8, 127.8, 125.74, 125.66, 124.6, 123.9, 120.9, 118.3, 115.0, 104.9, 52.4, 50.5, 48.4, 48.0, 44.3, 38.0, 35.9, 31.6, 29.4, 26.5, 25.6, 21.6, 13.9 ppm.

**HRMS** (ESI+) Calcd for  $\text{C}_{29}\text{H}_{31}\text{BrNO}_3$   $[\text{M}+\text{H}]^+$ : 520.1482, found: 520.1492.

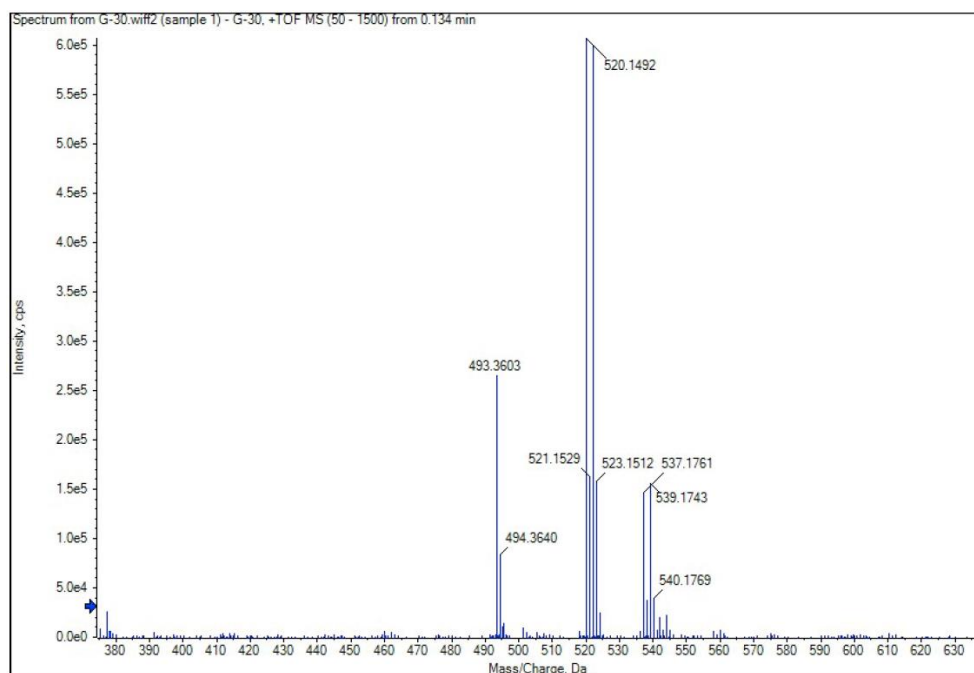

### General Procedure D.

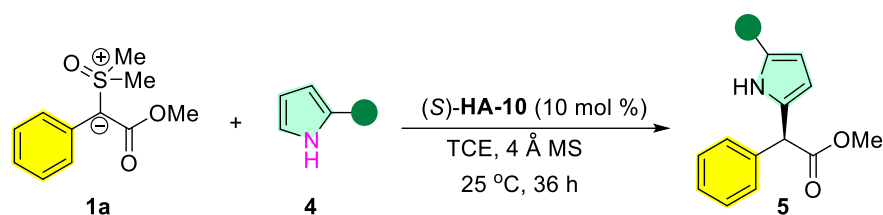

In an oven-dried 4-mL vial equipped with a magnetic stirring bar, sulfoxonium ylide **1a** (45.3 mg, 0.2 mmol, 1.0 equiv), CPA catalyst (S)-HA-10 (14.6 mg, 10 mol %), and 4 Å molecular sieves (100 mg) were combined. Subsequently, 1.0 mL of TCE was added, followed by the addition of pyrrole derivative **4** (0.22 mmol, 1.1 equiv). The resulting mixture was stirred at 25 °C and monitored by TLC. After completion (36 h), the mixture was directly subjected to flash column chromatography on silica gel (eluent: hexanes/ethyl acetate = 10:1) to afford the desired product **5**.

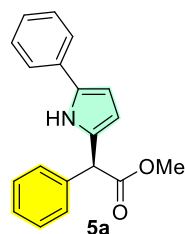

**Methyl (S)-2-phenyl-2-(5-phenyl-1H-pyrrol-2-yl)acetate (5a)** was prepared as a colorless oil according to the General Procedure D (eluent: hexanes/EtOAc = 10:1, 50.3 mg, 86% yield, 95% ee).

$[\alpha]_{\text{D}}^{25}$ : +107.8 ( $c = 1.0$ ,  $\text{CH}_2\text{Cl}_2$ ). HPLC analysis of the product: Daicel CHIRALPAK® AD-H column; 5% *i*-PrOH in *n*-hexane; 1.0 mL/min; retention times: 12.0 min (major), 14.0 min (minor).

$^1\text{H NMR}$  (400 MHz,  $\text{CDCl}_3$ )  $\delta$  9.05 (s, 1H), 7.39 – 7.36 (m, 2H), 7.27 – 7.18 (m, 7H), 7.13 – 7.07 (m, 1H), 6.37 – 6.35 (m, 1H), 6.01 – 6.00 (m, 1H), 5.01 (s, 1H), 3.67 (s, 3H) ppm.

$^{13}\text{C NMR}$  (100 MHz,  $\text{CDCl}_3$ )  $\delta$  173.0, 138.2, 132.7, 132.3, 128.9 (two C), 128.6, 127.9, 127.7, 126.2, 123.8, 109.7, 106.1, 52.7, 50.1 ppm.



HRMS (ESI+) Calcd for C<sub>19</sub>H<sub>18</sub>NO<sub>2</sub> [M+H]<sup>+</sup>: 292.1332, found: 292.1325.

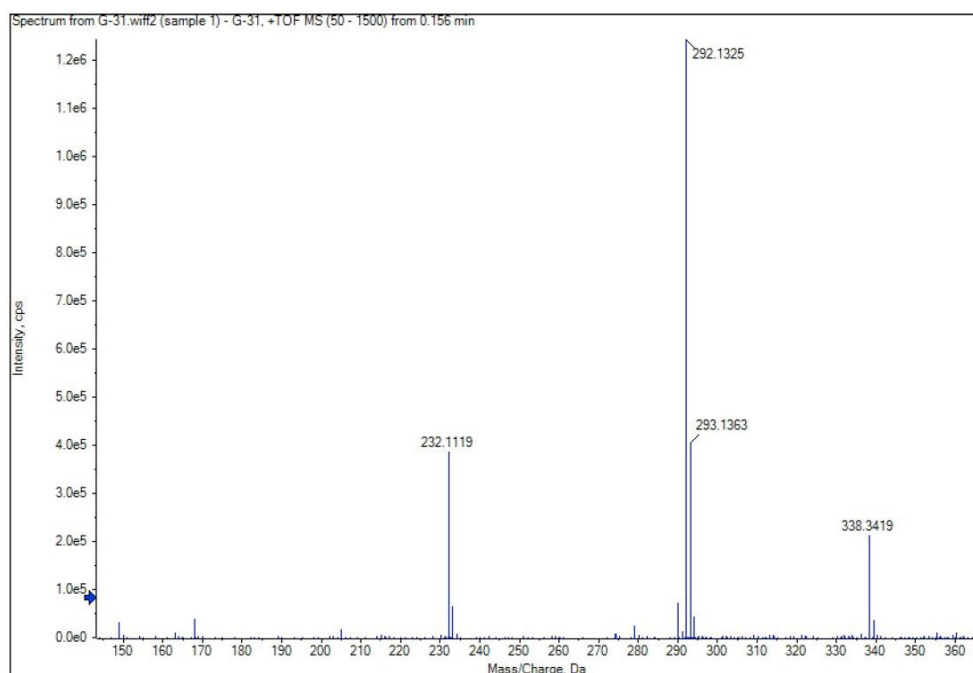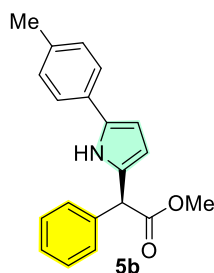

**Methyl (S)-2-phenyl-2-(5-(p-tolyl)-1H-pyrrol-2-yl)acetate (5b)** was prepared as a brown solid according to the General Procedure D (eluent: hexanes/EtOAc = 10:1, 52.7 mg, 87% yield, 93% ee).

$[\alpha]_{\text{D}}^{25}$ : +51.1 ( $c = 1.5$ , CH<sub>2</sub>Cl<sub>2</sub>). HPLC analysis of the product: Daicel CHIRALPAK<sup>®</sup> AD-H column; 5% *i*-PrOH in *n*-hexane; 1.0 mL/min; retention times: 13.8 min (major), 17.1 min (minor).

<sup>1</sup>H NMR (300 MHz, CDCl<sub>3</sub>)  $\delta$  9.06 (s, 1H), 7.37 – 7.25 (m, 7H), 7.15 – 7.13 (m, 2H), 6.40 – 6.38 (m, 1H), 6.07 (s, 1H), 5.08 (s, 1H), 3.75 (s, 3H), 2.32 (s, 3H) ppm.

<sup>13</sup>C NMR (75 MHz, CDCl<sub>3</sub>)  $\delta$  173.0, 138.3, 135.9, 132.5, 130.0, 129.5, 128.9, 128.1, 127.9, 127.6, 123.8, 109.6, 105.5, 52.6, 50.1, 21.2 ppm.

HRMS (ESI+) Calcd for C<sub>20</sub>H<sub>20</sub>NO<sub>2</sub> [M+H]<sup>+</sup>: 306.1489, found: 306.1481.

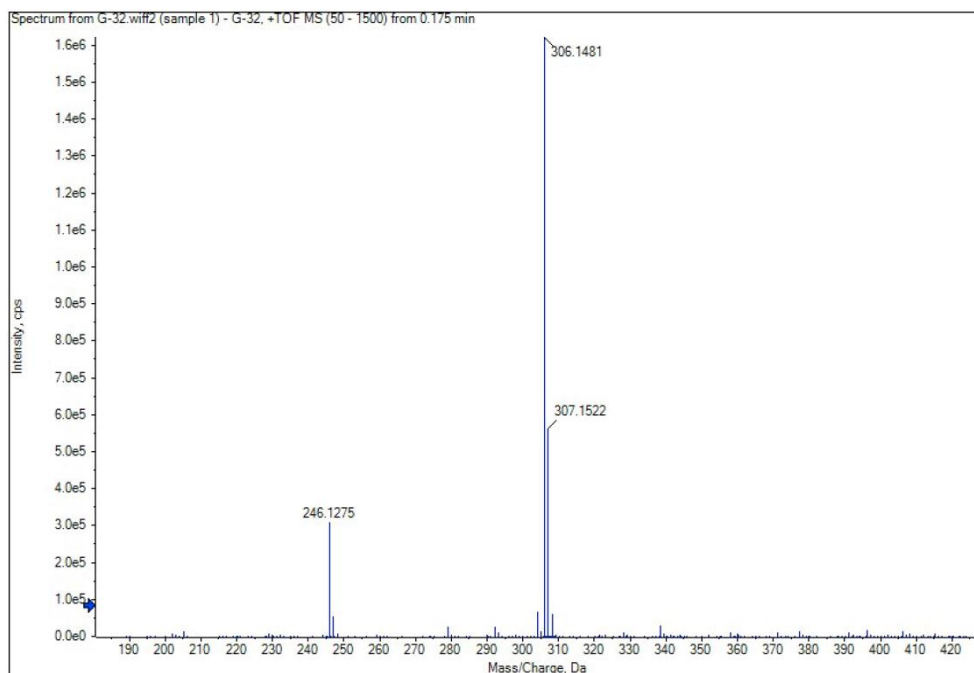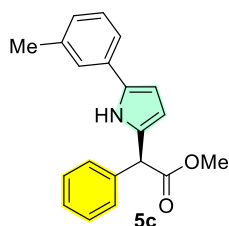

**Methyl (S)-2-phenyl-2-(5-(m-tolyl)-1H-pyrrol-2-yl)acetate (5c)** was prepared as a brown oil according to the General Procedure D (eluent: hexanes/EtOAc = 10:1, 56.1 mg, 92% yield, 93% ee).

$[\alpha]_D^{25}$ : +52.3 ( $c = 1.5$ ,  $\text{CH}_2\text{Cl}_2$ ). HPLC analysis of the product: Daicel CHIRALPAK® AD-H column; 10% *i*-PrOH in *n*-hexane; 1.0 mL/min; retention times: 7.4 min (major), 7.9 min (minor).

$^1\text{H NMR}$  (400 MHz,  $\text{CDCl}_3$ )  $\delta$  9.11 (s, 1H), 7.33 – 7.20 (m, 8H), 7.00 – 6.98 (m, 1H), 6.43 – 6.42 (m, 1H), 6.08 – 6.07 (m, 1H), 5.09 (s, 1H), 3.75 (s, 3H), 2.35 (s, 3H) ppm.

$^{13}\text{C NMR}$  (100 MHz,  $\text{CDCl}_3$ )  $\delta$  173.1, 138.5, 138.3, 132.6, 132.5, 128.9, 128.8, 128.4, 127.9, 127.7, 127.0, 124.5, 121.0, 109.7, 106.0, 52.7, 50.1, 21.6 ppm.

**HRMS** (ESI+) Calcd for  $\text{C}_{20}\text{H}_{20}\text{NO}_2$   $[\text{M}+\text{H}]^+$ : 306.1489, found: 306.1483.

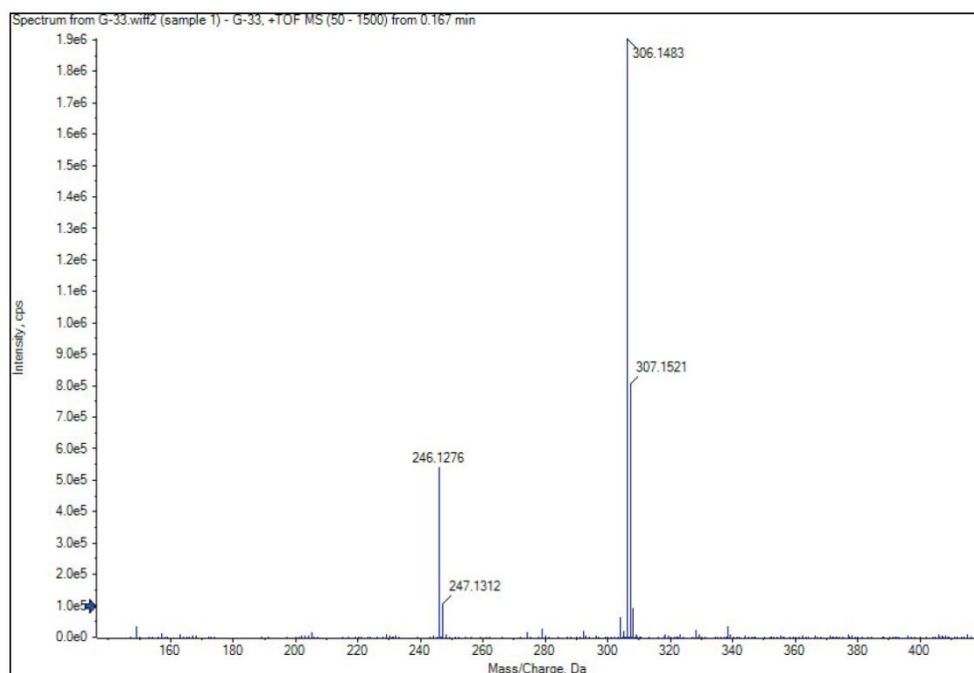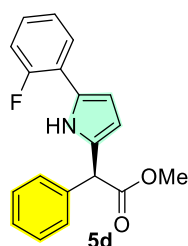

**Methyl (S)-2-(5-(2-fluorophenyl)-1H-pyrrol-2-yl)-2-phenylacetate (5d)** was prepared as a brown solid according to the General Procedure D (eluent: hexanes/EtOAc = 10:1, 47.6 mg, 77% yield, 96% ee).

$[\alpha]_{\text{D}}^{25}$ : +37.5 ( $c = 1.5$ ,  $\text{CH}_2\text{Cl}_2$ ). HPLC analysis of the product: Daicel CHIRALPAK<sup>®</sup> AD-H column; 5% *i*-PrOH in *n*-hexane; 1.0 mL/min; retention times: 9.8 min (major), 11.3 min (minor).

<sup>1</sup>H NMR (300 MHz,  $\text{CDCl}_3$ )  $\delta$  9.59 (s, 1H), 7.59 – 7.53 (m, 1H), 7.32 – 7.26 (m, 5H), 7.11 – 7.04 (m, 3H), 6.57 (s, 1H), 6.10 (s, 1H), 5.09 (s, 1H), 3.76 (s, 3H) ppm.

<sup>13</sup>C NMR (75 MHz,  $\text{CDCl}_3$ )  $\delta$  172.6, 158.5 (d,  $^1J_{\text{C-F}} = 243.1$  Hz), 138.0, 129.0 (d,  $^3J_{\text{C-F}} = 3.3$  Hz), 128.9, 127.9, 127.7, 127.0 (d,  $^3J_{\text{C-F}} = 8.6$  Hz), 126.8 (d,  $^5J_{\text{C-F}} = 2.0$  Hz), 126.4 (d,  $^3J_{\text{C-F}} = 4.4$  Hz), 124.6 (d,  $^4J_{\text{C-F}} = 3.1$  Hz), 120.3 (d,  $^2J_{\text{C-F}} = 11.3$  Hz), 116.3 (d,  $^2J_{\text{C-F}} = 23.0$  Hz), 109.1, 107.9 (d,  $^4J_{\text{C-F}} = 2.8$  Hz), 52.7, 50.2 ppm.

<sup>19</sup>F NMR (282 MHz,  $\text{CDCl}_3$ )  $\delta$  -118.6 ppm.

HRMS (ESI+) Calcd for C<sub>19</sub>H<sub>17</sub>FNO<sub>2</sub> [M+H]<sup>+</sup>: 310.1238, found: 310.1230.

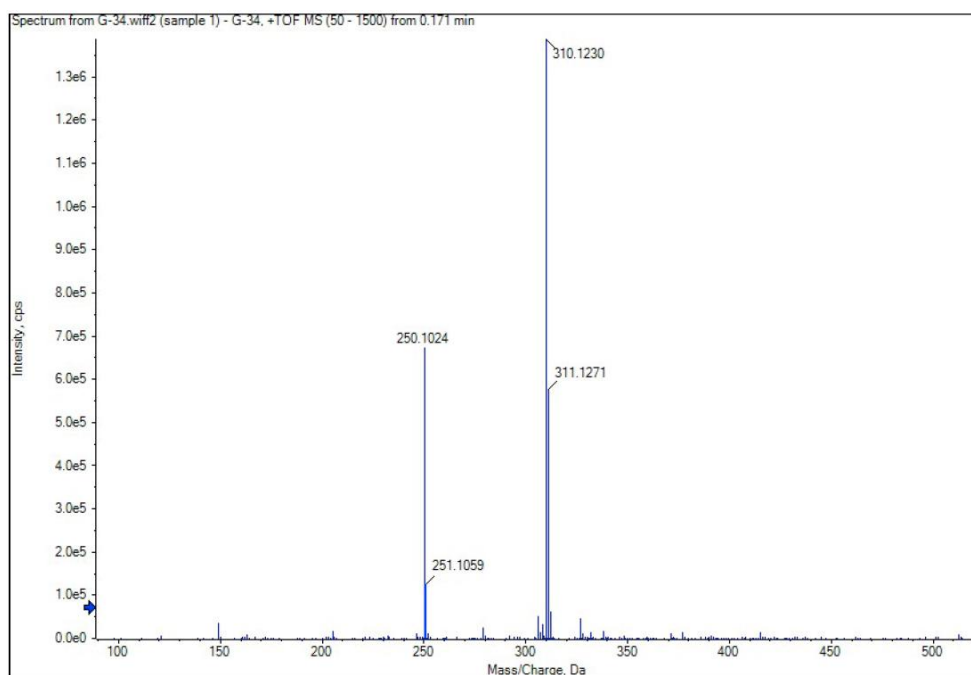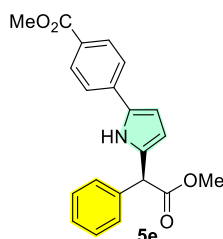

**Methyl (S)-4-(5-(2-methoxy-2-oxo-1-phenylethyl)-1H-pyrrol-2-yl)benzoate (5e)** was prepared as a yellow oil according to the General Procedure D (eluent: hexanes/EtOAc = 10:1, 66.4 mg, 95% yield, 96% ee).

$[\alpha]_D^{25}$ : +195.2 ( $c = 1.5$ , CH<sub>2</sub>Cl<sub>2</sub>). HPLC analysis of the product: Daicel CHIRALPAK<sup>®</sup> IC column; 10% *i*-PrOH in *n*-hexane; 1.0 mL/min; retention times: 12.7 min (major), 14.1 min (minor).

<sup>1</sup>H NMR (400 MHz, CDCl<sub>3</sub>)  $\delta$  9.39 (s, 1H), 7.99 (d,  $J = 8.4$  Hz, 2H), 7.50 (d,  $J = 8.4$  Hz, 2H), 7.34 – 7.25 (m, 5H), 6.58 – 6.56 (m, 1H), 6.12 – 6.11 (m, 1H), 5.10 (s, 1H), 3.89 (s, 3H), 3.76 (s, 3H) ppm.

<sup>13</sup>C NMR (100 MHz, CDCl<sub>3</sub>)  $\delta$  172.9, 167.0, 137.9, 136.7, 131.1, 130.3, 130.2, 128.9, 127.84, 127.76, 127.2, 123.0, 110.3, 108.1, 52.8, 52.1, 50.0 ppm.

HRMS (ESI+) Calcd for C<sub>21</sub>H<sub>20</sub>NO<sub>4</sub> [M+H]<sup>+</sup>: 350.1387, found: 350.1382.

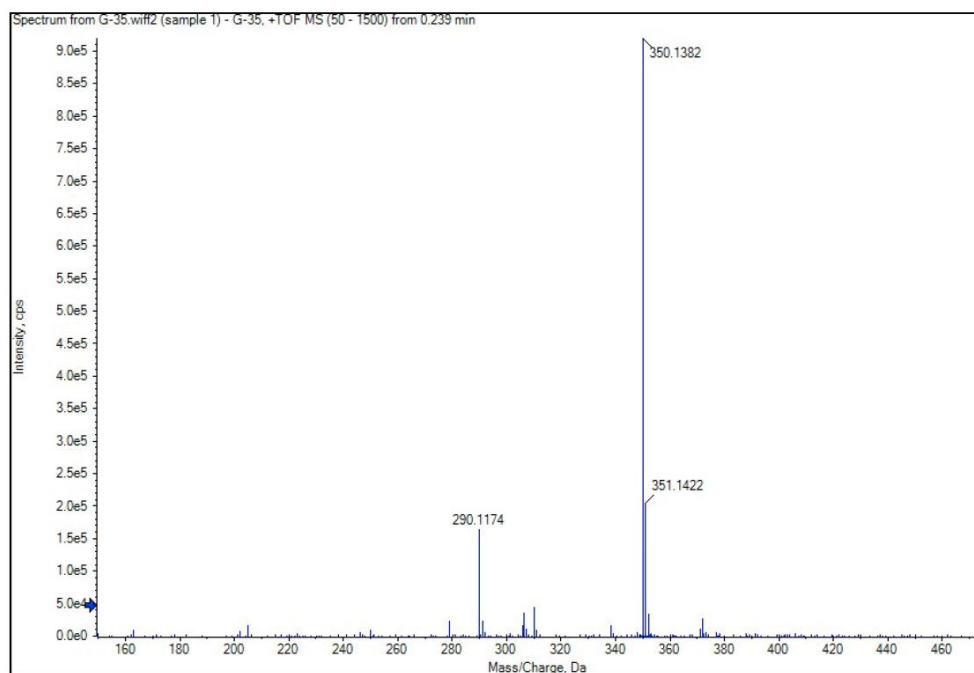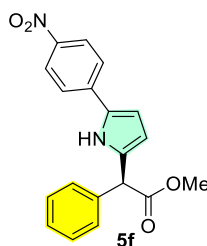

**Methyl (S)-2-(5-(4-nitrophenyl)-1H-pyrrol-2-yl)-2-phenylacetate (5f)** was prepared as a yellow oil according to the General Procedure D (eluent: hexanes/DCM = 3:1, 57.9 mg, 86% yield, 91% ee).

$[\alpha]_D^{25}$ : +154.0 ( $c = 1.5$ ,  $\text{CH}_2\text{Cl}_2$ ). HPLC analysis of the product: Daicel CHIRALPAK<sup>®</sup> IC column; 10% *i*-PrOH in *n*-hexane; 1.0 mL/min; retention times: 12.8 min (minor), 13.5 min (major).

<sup>1</sup>H NMR (400 MHz,  $\text{CDCl}_3$ )  $\delta$  9.52 (s, 1H), 8.17 (d,  $J = 8.9$  Hz, 2H), 7.53 (d,  $J = 8.9$  Hz, 2H), 7.36 – 7.28 (m, 5H), 6.65 – 6.63 (m, 1H), 6.15 – 6.13 (m, 1H), 5.12 (s, 1H), 3.79 (s, 3H) ppm.

<sup>13</sup>C NMR (100 MHz,  $\text{CDCl}_3$ )  $\delta$  172.9, 145.2, 138.5, 137.6, 131.8, 129.9, 129.0, 127.9, 127.8, 124.6, 123.2, 110.8, 109.9, 52.9, 49.9 ppm.

HRMS (ESI+) Calcd for  $\text{C}_{19}\text{H}_{17}\text{N}_2\text{O}_4$   $[\text{M}+\text{H}]^+$ : 337.1183, found: 337.1174.

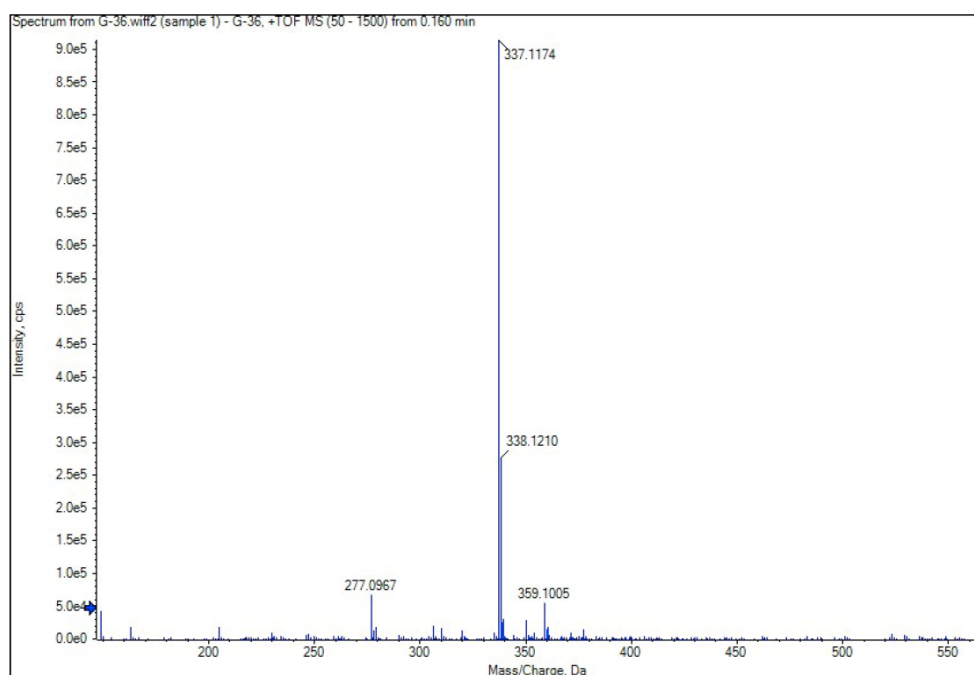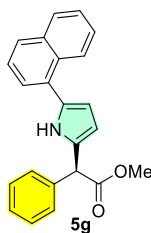

**Methyl (S)-2-(5-(naphthalen-1-yl)-1H-pyrrol-2-yl)-2-phenylacetate (5g)** was prepared as a brown oil according to the General Procedure D (eluent: hexanes/EtOAc = 10:1, 53.3 mg, 78% yield, 87% ee).

$[\alpha]_{\text{D}}^{25}$ : +38.0 ( $c = 1.5$ ,  $\text{CH}_2\text{Cl}_2$ ). HPLC analysis of the product: Daicel CHIRALPAK<sup>®</sup> AD-H column; 1% *i*-PrOH in *n*-hexane; 1.0 mL/min; retention times: 22.9 min (minor), 25.4 min (major).

<sup>1</sup>H NMR (400 MHz,  $\text{CDCl}_3$ )  $\delta$  9.02 (s, 1H), 8.34 – 8.31 (m, 1H), 7.86 – 7.84 (m, 1H), 7.77 – 7.75 (m, 1H), 7.49 – 7.44 (m, 4H), 7.36 – 7.24 (m, 5H), 6.44 – 6.43 (m, 1H), 6.20 – 6.19 (m, 1H), 5.14 (s, 1H), 3.74 (s, 3H) ppm.

<sup>13</sup>C NMR (100 MHz,  $\text{CDCl}_3$ )  $\delta$  172.9, 138.3, 134.1, 131.5, 131.3, 130.8, 128.9, 128.5, 128.3, 128.0, 127.7, 127.5, 126.4, 126.03, 126.0, 125.8, 125.5, 109.7, 109.1, 52.7, 50.3 ppm.

**HRMS** (ESI+) Calcd for  $\text{C}_{23}\text{H}_{20}\text{NO}_2$   $[\text{M}+\text{H}]^+$ : 342.1489, found: 342.1478.

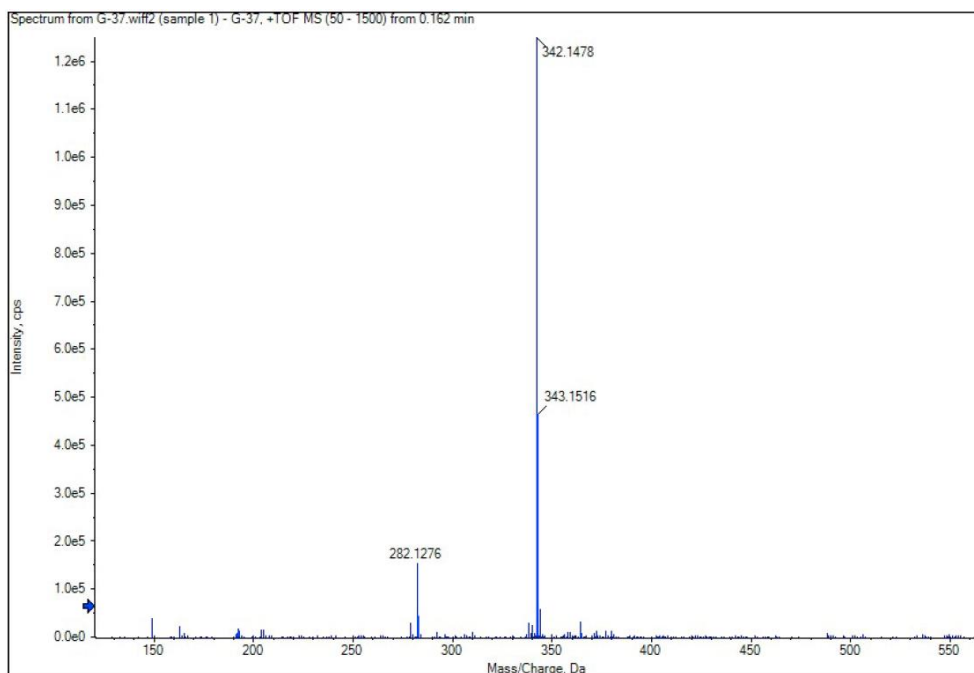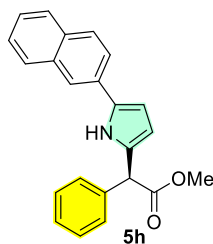

**Methyl (S)-2-(5-(naphthalen-2-yl)-1H-pyrrol-2-yl)-2-phenylacetate (5h)** was prepared as a brown solid according to the General Procedure D (eluent: hexanes/EtOAc = 10:1, 61.6 mg, 90% yield, 95% ee).

$[\alpha]_D^{25}$ : +92.6 ( $c = 1.5$ ,  $\text{CH}_2\text{Cl}_2$ ). HPLC analysis of the product: Daicel CHIRALPAK® AD-H column; 10% *i*-PrOH in *n*-hexane; 1.0 mL/min; retention times: 12.2 min (major), 14.1 min (minor).

$^1\text{H NMR}$  (400 MHz,  $\text{CDCl}_3$ )  $\delta$  9.31 (s, 1H), 7.82 – 7.74 (m, 4H), 7.64 – 7.61 (m, 1H), 7.44 – 7.25 (m, 7H), 6.57 – 6.56 (m, 1H), 6.14 – 6.12 (m, 1H), 5.11 (s, 1H), 3.74 (s, 3H) ppm.

$^{13}\text{C NMR}$  (100 MHz,  $\text{CDCl}_3$ )  $\delta$  173.1, 138.2, 133.9, 132.4, 132.2, 130.1, 129.1, 129.0, 128.6, 127.9, 127.81, 127.78, 127.7, 126.5, 125.4, 123.2, 120.9, 110.0, 106.9, 52.8, 50.2 ppm.

**HRMS** (ESI+) Calcd for  $\text{C}_{23}\text{H}_{20}\text{NO}_2$   $[\text{M}+\text{H}]^+$ : 342.1489, found: 342.1479.

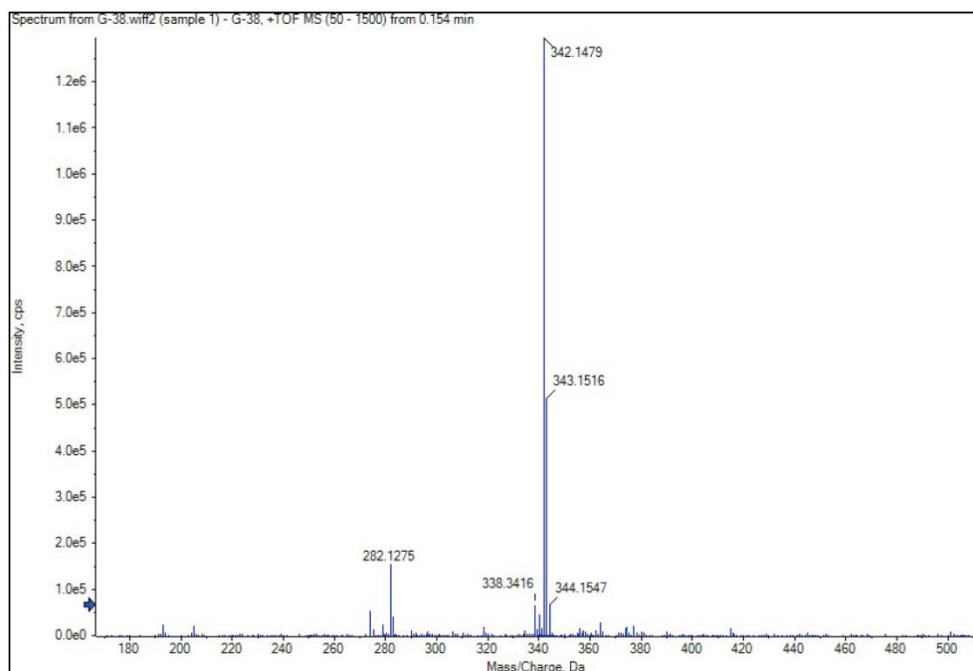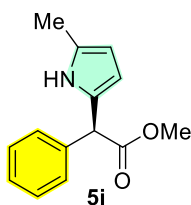

**Methyl (S)-2-(5-methyl-1H-pyrrol-2-yl)-2-phenylacetate (5i)** was prepared as a colorless oil according to the General Procedure D (eluent: hexanes/EtOAc = 10:1, 38.2 mg, 83% yield, 92% ee).

$[\alpha]_D^{25}$ : +9.8 ( $c = 1.0$ ,  $\text{CH}_2\text{Cl}_2$ ). HPLC analysis of the product: Daicel CHIRALPAK<sup>®</sup> IC column; 1% *i*-PrOH in *n*-hexane; 1.0 mL/min; retention times: 9.9 min (minor), 11.5 min (major).

<sup>1</sup>H NMR (300 MHz,  $\text{CDCl}_3$ )  $\delta$  8.41 (s, 1H), 7.33 – 7.22 (m, 5H), 5.90 (s, 1H), 5.79 (s, 1H), 5.00 (s, 1H), 3.73 (s, 3H), 2.23 (s, 3H) ppm.

<sup>13</sup>C NMR (75 MHz,  $\text{CDCl}_3$ )  $\delta$  173.1, 138.5, 128.7, 128.1, 127.8, 127.4, 125.9, 108.0, 106.0, 52.5, 50.2, 13.1 ppm.

HRMS (ESI+) Calcd for  $\text{C}_{14}\text{H}_{16}\text{NO}_2$   $[\text{M}+\text{H}]^+$ : 230.1176, found: 230.1171.



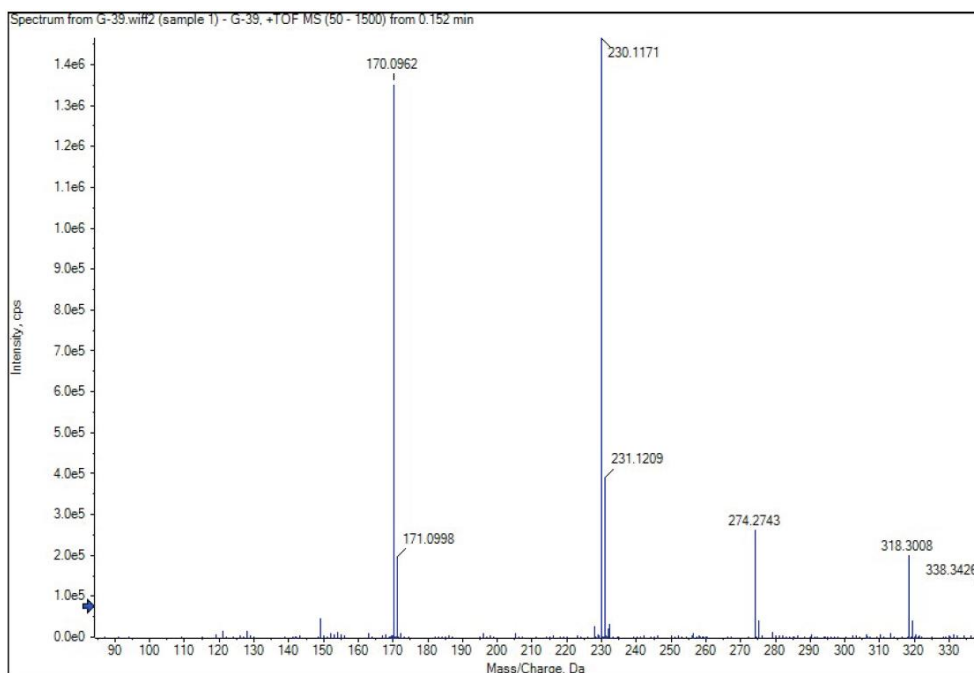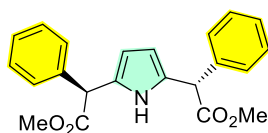

**5j**

**Methyl (S)-2-(5-((R)-2-methoxy-2-oxo-1-phenylethyl)-1H-pyrrol-2-yl)-2-phenylacetate (5j)** was prepared as a yellow oil according to the General Procedure D (eluent: hexanes/EtOAc = 10:1, 56.0 mg, 77% yield, 96% ee, C<sub>2</sub>: *meso* = 2:1 by crude <sup>1</sup>H NMR analysis).

[α]<sub>D</sub><sup>25</sup>: +38.5 (c = 1.0, CH<sub>2</sub>Cl<sub>2</sub>). HPLC analysis of the product: Daicel CHIRALPAK<sup>®</sup> IC column; 10% *i*-PrOH in *n*-hexane; 1.0 mL/min; retention times: 7.8 min (major), 8.5 min (minor).

<sup>1</sup>H NMR (400 MHz, CDCl<sub>3</sub>) δ 9.28 – 9.24 (m, 1H), 7.34 – 7.24 (m, 10H), 5.95 – 5.91 (m, 2H), 5.021 – 5.015 (m, 2H), 3.73 (s, 6H) ppm.

<sup>13</sup>C NMR (75 MHz, CDCl<sub>3</sub>) δ 172.6, 138.1, 128.7, 128.0, 127.7, 127.5, 107.9, 52.5, 50.3 ppm.

HRMS (ESI+) Calcd for C<sub>22</sub>H<sub>22</sub>NO<sub>4</sub> [M+H]<sup>+</sup>: 364.1543, found: 364.1541.

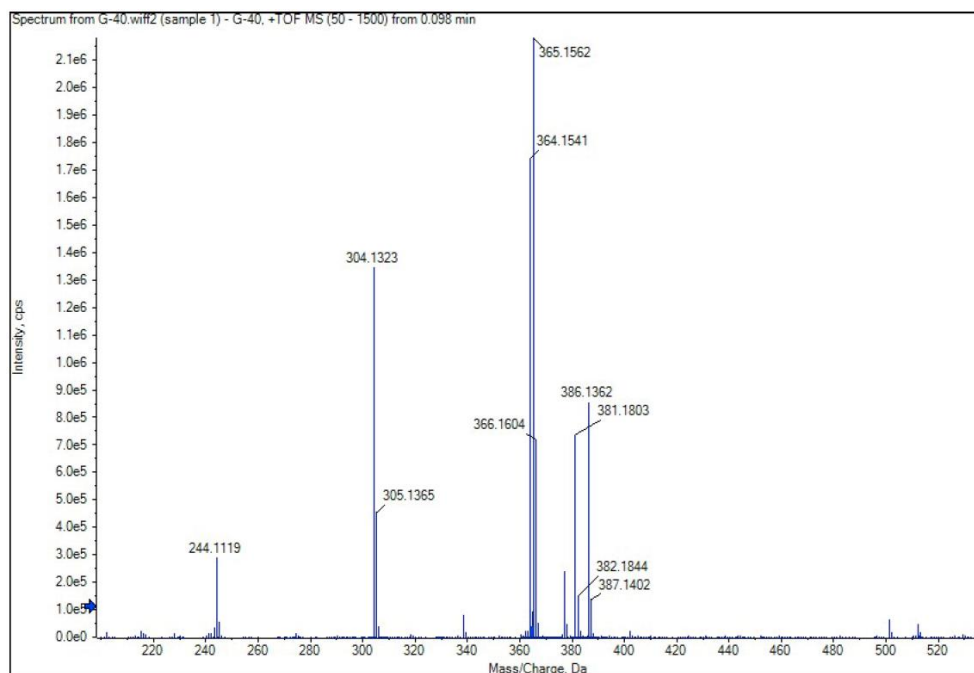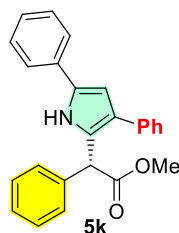

**Methyl (R)-2-(3,5-diphenyl-1H-pyrrol-2-yl)-2-phenylacetate (5k)** was prepared as a yellow oil according to the General Procedure D (eluent: hexanes/EtOAc = 10:1, 58.6 mg, 80% yield,  $-78\%$  ee).

$[\alpha]_D^{25}$ :  $-52.7$  ( $c = 1.0$ ,  $\text{CH}_2\text{Cl}_2$ ). HPLC analysis of the product: Daicel CHIRALPAK® AD-H column; 10% *i*-PrOH in *n*-hexane; 1.0 mL/min; retention times: 7.8 min (minor), 13.9 min (major).

$^1\text{H}$  NMR (400 MHz,  $\text{CDCl}_3$ )  $\delta$  9.54 (s, 1H), 7.55 – 7.53 (m, 2H), 7.39 – 7.20 (m, 13H), 6.65 – 6.64 (m, 1H), 5.33 (s, 1H), 3.74 (s, 3H) ppm.

$^{13}\text{C}$  NMR (100 MHz,  $\text{CDCl}_3$ )  $\delta$  173.6, 138.7, 136.0, 132.4, 132.0, 129.1, 129.0, 128.6, 128.2, 127.7, 127.6, 126.5, 126.2, 125.4, 123.9, 123.8, 106.6, 52.8, 47.8 ppm.

HRMS (ESI+) Calcd for  $\text{C}_{25}\text{H}_{22}\text{NO}_2$   $[\text{M}+\text{H}]^+$ : 368.1645, found: 368.1639.

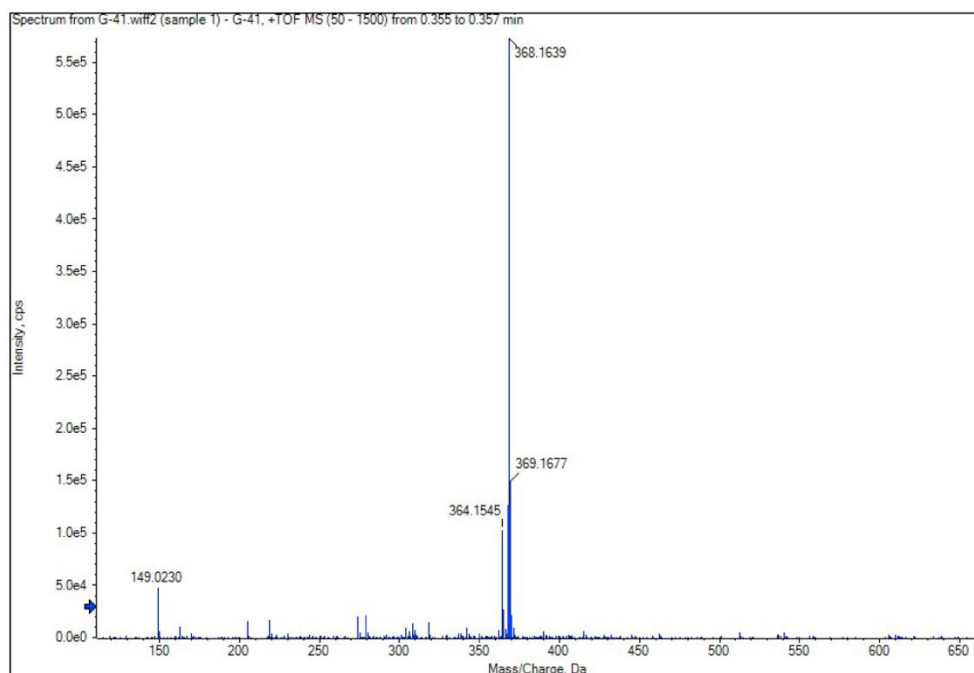

Note: the structure of optimal CPA for this case:

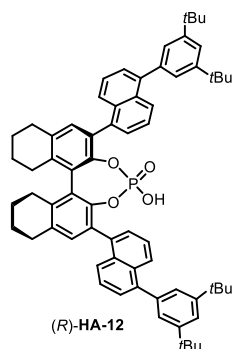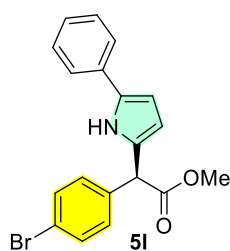

**Methyl (S)-2-(4-bromophenyl)-2-(5-phenyl-1H-pyrrol-2-yl) acetate (51)** was prepared as a colorless oil according to the General Procedure D (eluent: hexanes/EtOAc = 10:1, 66 mg, 89% yield, 96% ee).

$[\alpha]_D^{25}$ : +151.0 ( $c = 1.0$ ,  $\text{CH}_2\text{Cl}_2$ ). HPLC analysis of the product: Daicel CHIRALPAK® AD-H column; 10% *i*-PrOH in *n*-hexane; 1.0 mL/min; retention times: 10.3 min (major), 12.1 min (minor).

$^1\text{H}$  NMR (300 MHz,  $\text{CDCl}_3$ )  $\delta$  9.11 (s, 1H), 7.47 – 7.42 (m, 4H), 7.37 – 7.32 (m, 2H), 7.21 – 7.16 (m, 3H), 6.44 (t,  $J = 3.0$  Hz, 1H), 6.06 (t,  $J = 3.0$  Hz, 1H), 5.03 (s, 1H), 3.76 (s, 3H) ppm.

$^{13}\text{C}$  NMR (75 MHz,  $\text{CDCl}_3$ )  $\delta$  172.5, 137.2, 132.5, 131.9, 129.7 (two C), 128.9, 127.9, 126.3, 123.8, 121.7, 109.9, 106.1, 52.8, 49.5 ppm.

HRMS (ESI+) Calcd for  $\text{C}_{19}\text{H}_{17}\text{BrNO}_2$   $[\text{M}+\text{H}]^+$ : 370.0437, found: 370.0428.

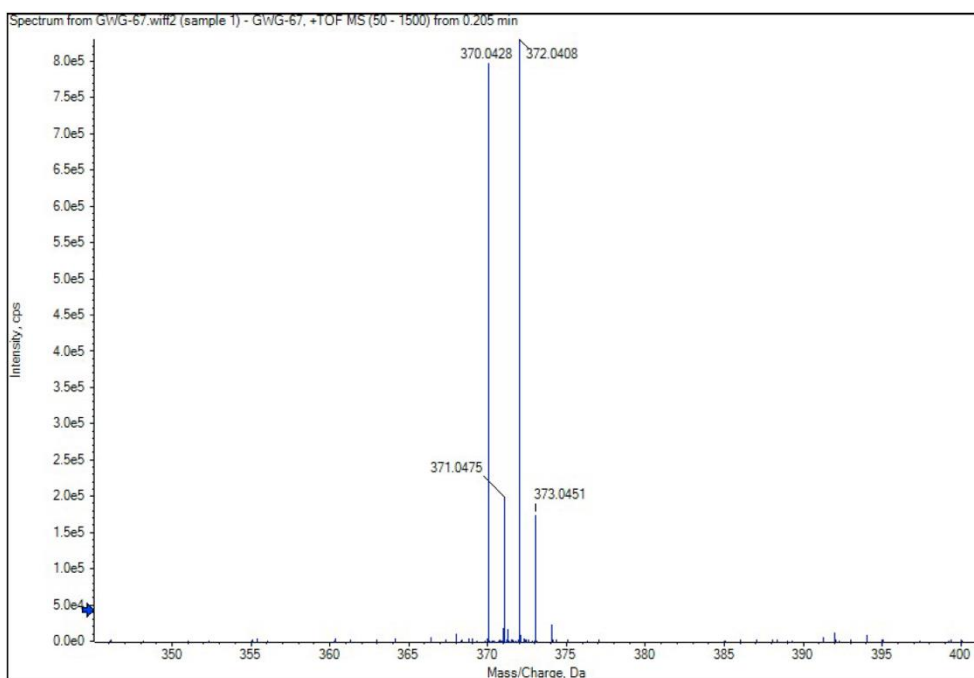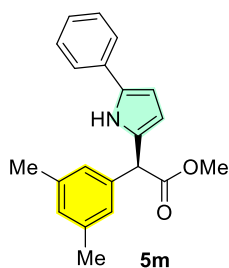

**Methyl (S)-2-(3,5-dimethylphenyl)-2-(5-phenyl-1H-pyrrol-2-yl) acetate (5m)**

was prepared as a colorless oil according to the General Procedure D (eluent: hexanes/EtOAc = 10:1, 56 mg, 88% yield, 97% ee).

$[\alpha]_{\text{D}}^{25}$ : +161.6 ( $c = 1.0$ ,  $\text{CH}_2\text{Cl}_2$ ). HPLC analysis of the product: Daicel CHIRALPAK<sup>®</sup> AD-H column; 10% *i*-PrOH in *n*-hexane; 1.0 mL/min; retention times: 5.9 min (major), 6.5 min (minor).

$^1\text{H}$  NMR (300 MHz,  $\text{CDCl}_3$ )  $\delta$  9.11 (s, 1H), 7.47 – 7.44 (m, 2H), 7.35 – 7.30 (m, 2H), 7.18 – 7.13 (m, 1H), 6.91 – 6.89 (m, 3H), 6.44 (t,  $J$  = 3.0 Hz, 1H), 6.08 (t,  $J$  = 3.0 Hz, 1H), 5.01 (s, 1H), 3.74 (s, 3H), 2.27 (s, 6H) ppm.

$^{13}\text{C}$  NMR (75 MHz,  $\text{CDCl}_3$ )  $\delta$  173.2, 138.5, 138.0, 132.8, 132.2, 129.4, 128.92, 128.90, 126.1, 125.6, 123.8, 109.5, 106.1, 52.7, 50.0, 21.4 ppm.

HRMS (ESI+) Calcd for  $\text{C}_{21}\text{H}_{22}\text{NO}_2$   $[\text{M}+\text{H}]^+$ : 320.1645, found: 320.1637.

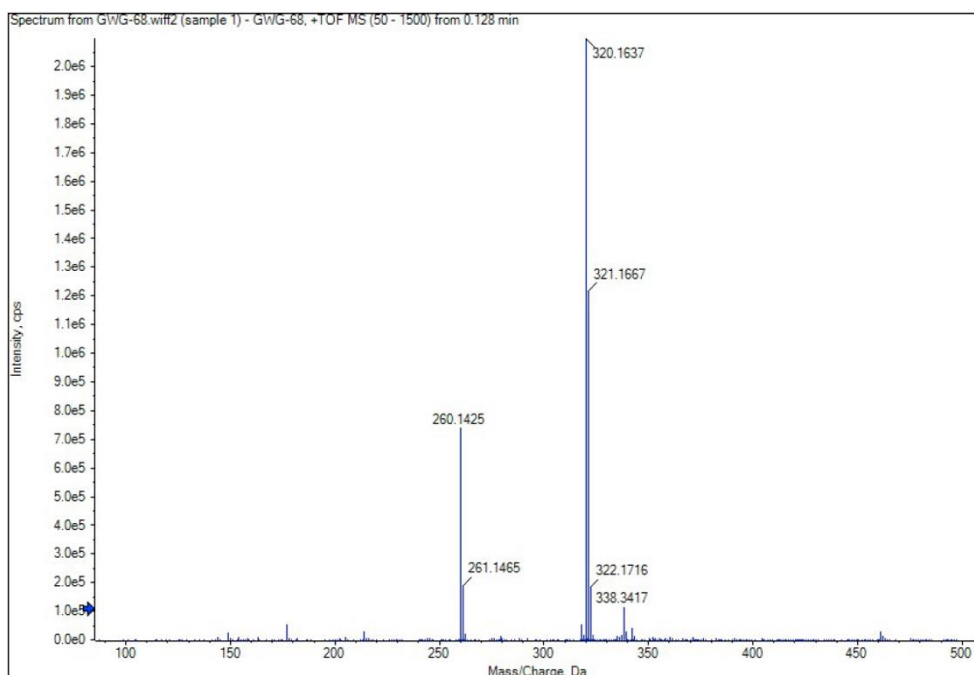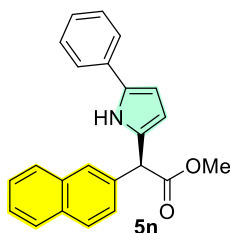

**Methyl (S)-2-(naphthalen-2-yl)-2-(5-phenyl-1H-pyrrol-2-yl) acetate (5n)** was prepared as a colorless oil according to the General Procedure D (eluent: hexanes/EtOAc = 10:1, 47 mg, 69% yield, 96% ee).

$[\alpha]_{\text{D}}^{25}$ : +262.4 ( $c$  = 1.0,  $\text{CH}_2\text{Cl}_2$ ). HPLC analysis of the product: Daicel CHIRALPAK<sup>®</sup> AD-H column; 10% *i*-PrOH in *n*-hexane; 1.0 mL/min; retention times: 12.7 min (major), 16.2 min (minor).

$^1\text{H}$  NMR (300 MHz,  $\text{CDCl}_3$ )  $\delta$  9.17 (s, 1H), 7.79 – 7.73 (m, 4H), 7.47 – 7.42 (m,

5H), 7.34 – 7.29 (m, 2H), 7.18 – 7.13 (m, 1H), 6.46 (t,  $J = 3.0$  Hz, 1H), 6.12 (t,  $J = 3.0$  Hz, 1H), 5.24 (s, 1H), 3.75 (s, 3H) ppm.

$^{13}\text{C}$  NMR (75 MHz,  $\text{CDCl}_3$ )  $\delta$  173.0, 135.6, 133.5, 132.8, 132.7, 132.4, 128.9, 128.7, 128.6, 128.1, 127.7, 126.8, 126.4, 126.3, 126.2, 125.9, 123.8, 109.9, 106.2, 52.8, 50.3 ppm.

HRMS (ESI+) Calcd for  $\text{C}_{23}\text{H}_{20}\text{NO}_2$   $[\text{M}+\text{H}]^+$ : 342.1489, found: 342.1480.

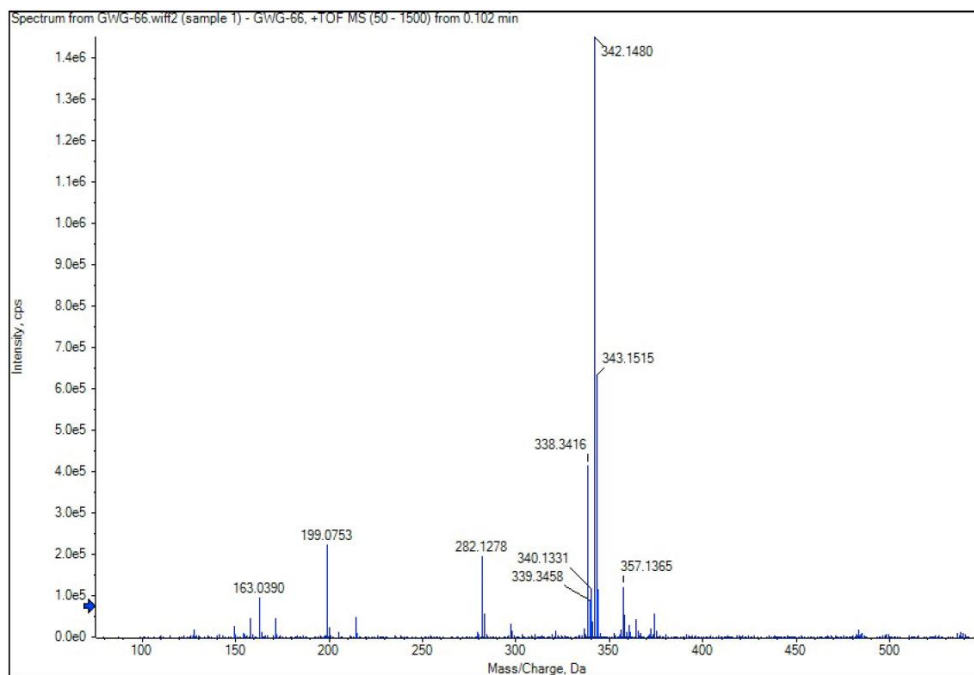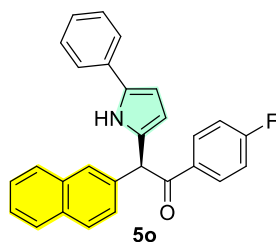

**(S)-1-(4-Fluorophenyl)-2-(naphthalen-2-yl)-2-(5-phenyl-1H-pyrrol-2-yl)ethan-1-one (5o)** was prepared as a yellow oil according to the General Procedure D (eluent: hexanes/EtOAc = 10:1, 51 mg, 63% yield, 90% ee).

$[\alpha]_{\text{D}}^{25}$ :  $-87.5$  ( $c = 1.0$ ,  $\text{CH}_2\text{Cl}_2$ ). HPLC analysis of the product: Daicel CHIRALPAK<sup>®</sup> AD-H column; 10% *i*-PrOH in *n*-hexane; 1.0 mL/min; retention times: 31.1 min (minor), 42.9 min (major).

$^1\text{H}$  NMR (300 MHz,  $\text{CDCl}_3$ )  $\delta$  9.26 (s, 1H), 8.65 (s, 1H), 8.14 – 8.12 (m, 1H), 8.01

– 7.89 (m, 3H), 7.68 – 7.53 (m, 4H), 7.42 – 7.36 (m, 4H), 7.28 – 7.22 (m, 1H), 7.08 – 7.02 (m, 2H), 6.53 (s, 1H), 6.35 (s, 1H), 6.25 (s, 1H) ppm.

$^{13}\text{C}$  NMR (75 MHz,  $\text{CDCl}_3$ )  $\delta$  198.9, 158.5 (d,  $^1J_{\text{C-F}} = 245.1$  Hz), 135.8, 134.9 (d,  $^4J_{\text{C-F}} = 3.1$  Hz), 133.7, 132.9, 132.6 (d,  $^3J_{\text{C-F}} = 10.6$  Hz), 131.0, 130.0, 129.9, 129.8, 129.5, 129.0, 128.89, 128.86, 127.8, 127.1, 126.3, 124.4, 123.8, 115.9 (d,  $^2J_{\text{C-F}} = 21.4$  Hz), 110.1, 106.2, 50.7 ppm.

$^{19}\text{F}$  NMR (282 MHz,  $\text{CDCl}_3$ )  $\delta$  –114.9 ppm.

HRMS (ESI+) Calcd for  $\text{C}_{28}\text{H}_{21}\text{FNO}$   $[\text{M}+\text{H}]^+$ : 406.1602, found: 406.1594.

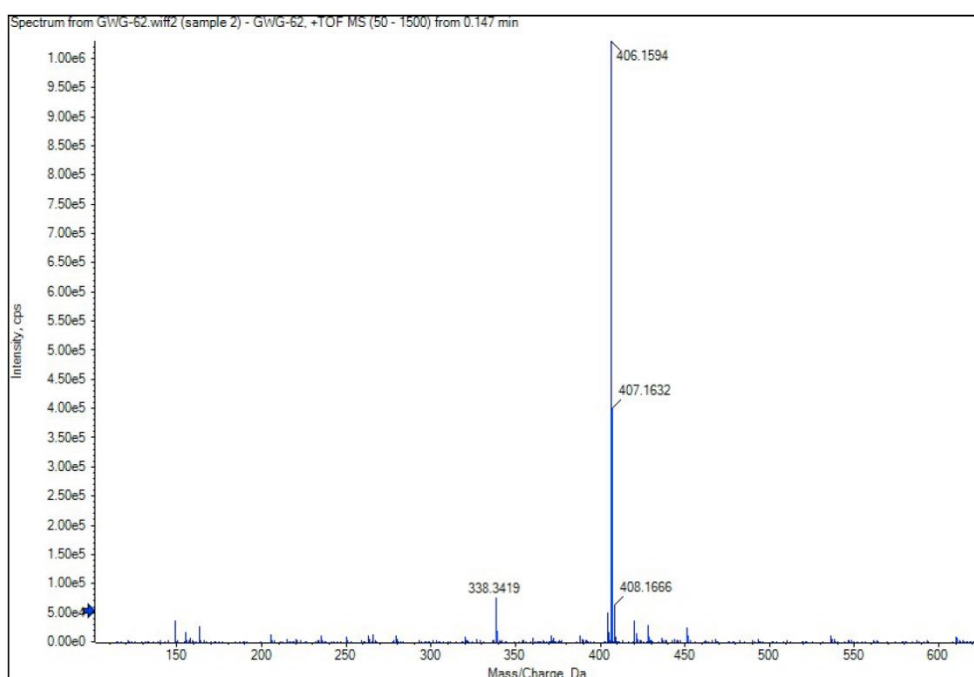

## V. Unsuccessful Carbon Nucleophiles

**Table S1** The selected unsuccessful nucleophiles.<sup>a</sup>

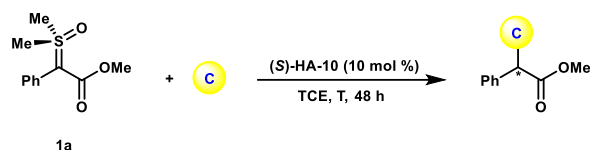

|       | T(40 °C)                        | T(90 °C) |
|-------|---------------------------------|----------|
|       | N. R.                           | N. R.    |
|       | N. R.                           | messy    |
|       | N. R.                           | N. R.    |
| TMSCN | N. R.                           | N. R.    |
|       | N. R.                           | N. R.    |
|       | N. R.                           | N. R.    |
|       | no desired product <sup>b</sup> |          |
|       | no desired product <sup>c</sup> |          |
|       | no desired product <sup>d</sup> |          |

<sup>a</sup> all reactions were carried out with **1a** (0.1 mmol), carbon nucleophile (0.11 mmol), and (S)-**HA-10** (10 mol %) in 1,1,2,2-tetrachloroethane (TCE) (0.5 mL) at the specified temperature for 48 h. <sup>b</sup> N–H insertion products were identified in 86% yield and 22% ee at 40 °C. <sup>c</sup> N–H insertion products were identified in 88% yield and 63% ee at 40 °C. <sup>d</sup> Trace amount of racemic N–H insertion products were identified at 40 °C.



## VI. The Procedure for Gram-Scale Synthesis and Synthetic Transformation

### Gram-Scale Synthesis of 3ai:

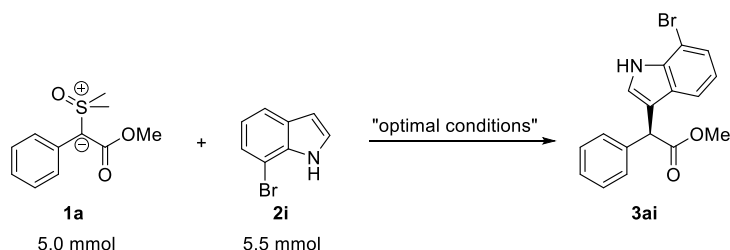

In an oven-dried 100-mL round-bottomed flask equipped with a magnetic stirring bar, sulfoxonium ylide **1a** (1.1 g, 5.0 mmol, 1.0 equiv), CPA catalyst (*S*)-**HA-10** (365 mg, 10 mol %), and 5 Å molecular sieves (2.5 g) were combined. Subsequently, 25.0 mL of TCE was added, followed by the addition of indole **2i** (1.1 g, 5.5 mmol, 1.1 equiv). The resulting mixture was stirred at 40 °C and monitored by TLC. After completion (48 h), the mixture was directly subjected to flash column chromatography on silica gel (eluent: hexanes/ethyl acetate = 10:1 to 5:1) to afford the desired product **3ai** (1.2 g, 70% yield, 96% ee). At the same time, the optimized catalyst (*S*)-**HA-10** could also be recovered in 90% yield (eluent: DCM/MeOH = 50:1, 328.5 mg). After fully acidified with 4 M HCl, the recovered catalyst could be used for the next batch reaction without adverse effect on reactivity and selectivity.

### Synthetic Transformations: Synthesis of Chiral Tryptophol 6

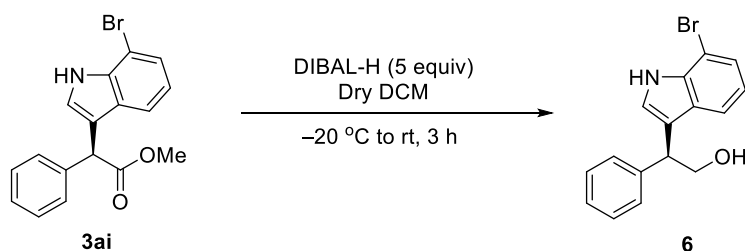

Under a nitrogen atmosphere, enantioenriched **3ai** (490.0 mg, 1.4 mmol, 1.0 equiv) and anhydrous DCM (10.0 mL) were introduced to an oven-dried 100-mL round-bottomed flask equipped with a magnetic stirring bar. The resulting

clear solution was cooled to  $-20\text{ }^{\circ}\text{C}$ , and DIBAL-H (7.0 mL, 7.0 mmol, 5 equiv, 1.0 M in *n*-hexane) was added dropwise. After completion (15 min), the reaction mixture was slowly warmed to room temperature and stirred for 3 h. Then, the reaction mixture was quenched employing 1.0 M HCl (5 mL), and extracted with DCM ( $3 \times 20\text{ mL}$ ). The combined organic phases were washed with brine, dried over  $\text{Na}_2\text{SO}_4$ , filtered, and concentrated under reduced pressure. The residue was purified on column chromatography on silica gel (eluent: hexanes/EtOAc = 5:1) to obtain the desired product **6**.

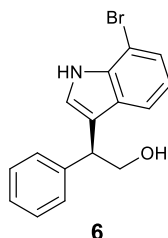

**(S)-2-(7-Bromo-1H-indol-3-yl)-2-phenylethan-1-ol (6)** was prepared as a white solid (420.5 mg, 95% yield, 96% ee).

$[\alpha]_{\text{D}}^{25}$ : +62.6 ( $c = 1.0$ ,  $\text{CH}_2\text{Cl}_2$ ). HPLC analysis of the product: Daicel CHIRALPAK<sup>®</sup> AD-H column; 10% *i*-PrOH in *n*-hexane; 1.0 mL/min; retention times: 32.0 min (minor), 34.2 min (major).

$^1\text{H NMR}$  (400 MHz,  $\text{CDCl}_3$ ) 8.27 (s, 1H), 7.26 – 7.19 (m, 6H), 7.14 – 7.11 (m, 1H), 7.032 – 7.028 (m, 1H), 6.80 (t,  $J = 7.8\text{ Hz}$ , 1H), 4.32 (t,  $J = 6.8\text{ Hz}$ , 1H), 4.12 – 4.01 (m, 2H), 1.71 (br, 1H) ppm.

$^{13}\text{C NMR}$  (100 MHz,  $\text{CDCl}_3$ )  $\delta$  141.3, 135.2, 128.7, 128.34, 128.28, 127.0, 124.7, 122.5, 120.8, 118.7, 117.4, 104.9, 66.4, 45.7 ppm.

**HRMS** (ESI+) Calcd for  $\text{C}_{16}\text{H}_{15}\text{NO}$   $[\text{M}+\text{H}]^+$ : 316.0332, found: 316.0331.

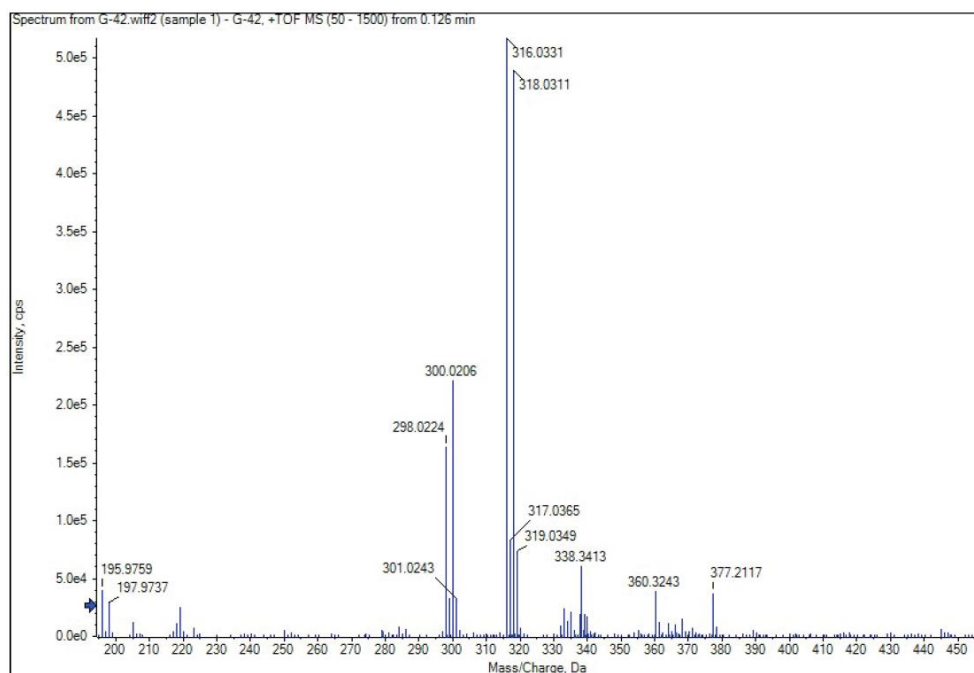

## Synthetic Transformations: Synthesis of O-Tosylated Tryptophol Derivative

7

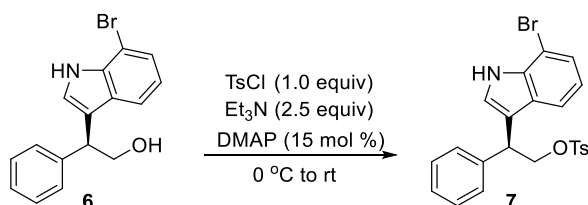

Under a nitrogen atmosphere, a solution of **6** (63.2 mg, 0.2 mmol, 96% ee) and DMAP (3.7 mg, 0.03 mmol, 15 mol%) in anhydrous DCM (10.0 mL) was treated with Et<sub>3</sub>N (69.5  $\mu$ L, 0.5 mmol, 2.5 equiv). The resulting colorless solution was cooled to 0 °C, and TsCl (38.1 mg, 0.2 mmol, 1.0 equiv) in anhydrous DCM (1.0 mL) was added dropwise. After completion (20 min), the reaction mixture was allowed to warm to room temperature. Following 24 h of stirring, the reaction mixture was diluted with DCM. The organic layer was subsequently washed with water and brine. The combined organic layers were dried over anhydrous Na<sub>2</sub>SO<sub>4</sub>, filtered, and concentrated under reduced pressure. The resulting

residue was purified by column chromatography on silica gel (eluent: hexanes/EtOAc = 5:1) to yield the desired product **7**.

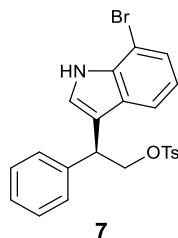

**(S)-2-(7-Bromo-1H-indol-3-yl)-2-phenylethyl 4-methylbenzenesulfonate (7)** was prepared as a colorless oil (60.2 mg, 64% yield, 96% ee).

$[\alpha]_D^{25}$ : +25.2 ( $c = 2.0$ ,  $\text{CH}_2\text{Cl}_2$ ). HPLC analysis of the product: Daicel CHIRALPAK® AD-H column; 10% *i*-PrOH in *n*-hexane; 1.0 mL/min; retention times: 26.3 min (major), 37.0 min (minor).

$^1\text{H NMR}$  (400 MHz,  $\text{CD}_2\text{Cl}_2$ ) 8.36 (s, 1H), 7.58 – 7.55 (m, 2H), 7.28 – 7.16 (m, 9H), 7.07 – 7.06 (m, 1H), 6.84 (t,  $J = 7.8$  Hz 1H), 4.58 – 4.44 (m, 3H), 2.38 (s, 3H) ppm.

$^{13}\text{C NMR}$  (100 MHz,  $\text{CD}_2\text{Cl}_2$ )  $\delta$  145.4, 140.1, 135.4, 132.9, 130.2, 129.0, 128.5, 128.1 (two C), 127.6, 124.9, 123.2, 121.1, 118.7, 116.4, 105.0, 72.7, 42.7, 21.8 ppm.

**HRMS** (ESI+) Calcd for  $\text{C}_{23}\text{H}_{21}\text{BrNO}_3\text{S}$   $[\text{M}+\text{H}]^+$ : 470.0400, found: 472.0396.

**Note: this compound has been observed to exhibit low stability at room temperature.**

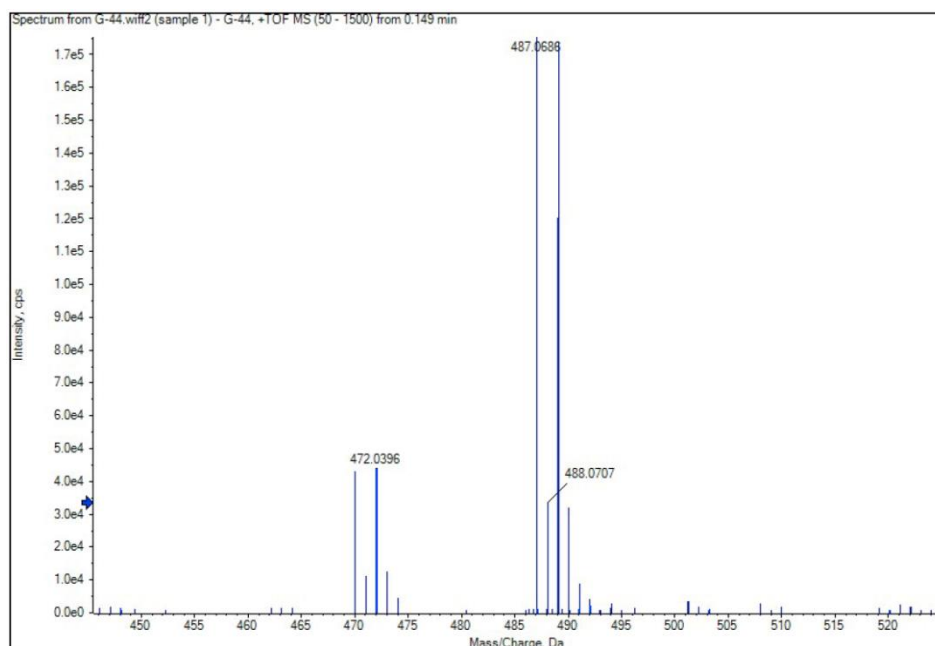

### Synthetic Transformations: Synthesis of **8** via Pictet-Spengler Reaction

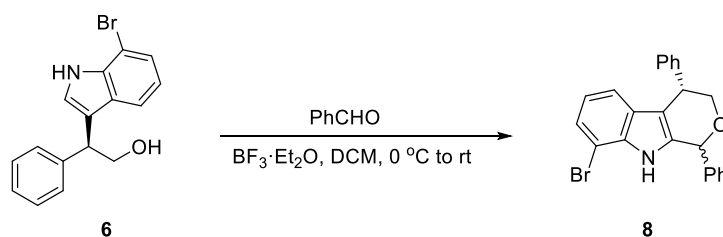

Under a nitrogen atmosphere, a solution of **6** (158.1 mg, 0.5 mmol, 96% ee) and benzaldehyde (76.5  $\mu\text{L}$ , 0.75 mmol, 1.5 equiv) in anhydrous DCM (10.0 mL) at 0  $^\circ\text{C}$  was treated with  $\text{BF}_3 \cdot \text{Et}_2\text{O}$  (0.05 mmol, 10 mol %). The resulted mixture was allowed to stirred at room temperature for 4 h, then concentrated at reduced pressure. The residue was purified by column chromatography on silica gel (eluent: hexanes/ethyl acetate = 20:1) to afford the desired product **8**.

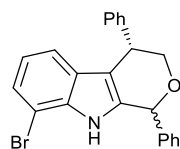

**8A**

**Isomer (8A)** was prepared as a white solid (32% yield, 95% ee).

$[\alpha]_{\text{D}}^{25}$ :  $-48.9$  ( $c = 2.0$ ,  $\text{CH}_2\text{Cl}_2$ ). HPLC analysis of the product: Daicel

CHIRALPAK® AS-H column; 5% *i*-PrOH in *n*-hexane; 1.0 mL/min; retention times: 7.0 min (major), 9.8 min (minor).

<sup>1</sup>H NMR (400 MHz, CDCl<sub>3</sub>) 7.69 (s, 1H), 7.42 (s, 5H), 7.33 – 7.22 (m, 6H), 6.80 – 6.75 (m, 2H), 5.923 – 5.919 (m, 1H), 4.53 – 4.50 (m, 1H), 4.39 – 4.35 (m, 1H), 3.81 – 3.76 (m, 1H) ppm.

<sup>13</sup>C NMR (100 MHz, CDCl<sub>3</sub>) δ 140.4, 138.7, 135.4, 134.9, 129.3, 129.1, 128.61 (two C), 128.55, 127.5, 127.1, 124.3, 120.9, 119.2, 113.0, 104.6, 76.4, 72.6, 41.3 ppm.

HRMS (ESI+) Calcd for C<sub>22</sub>H<sub>19</sub>BrNO [M+H]<sup>+</sup>: 404.0645, found: 404.0638.

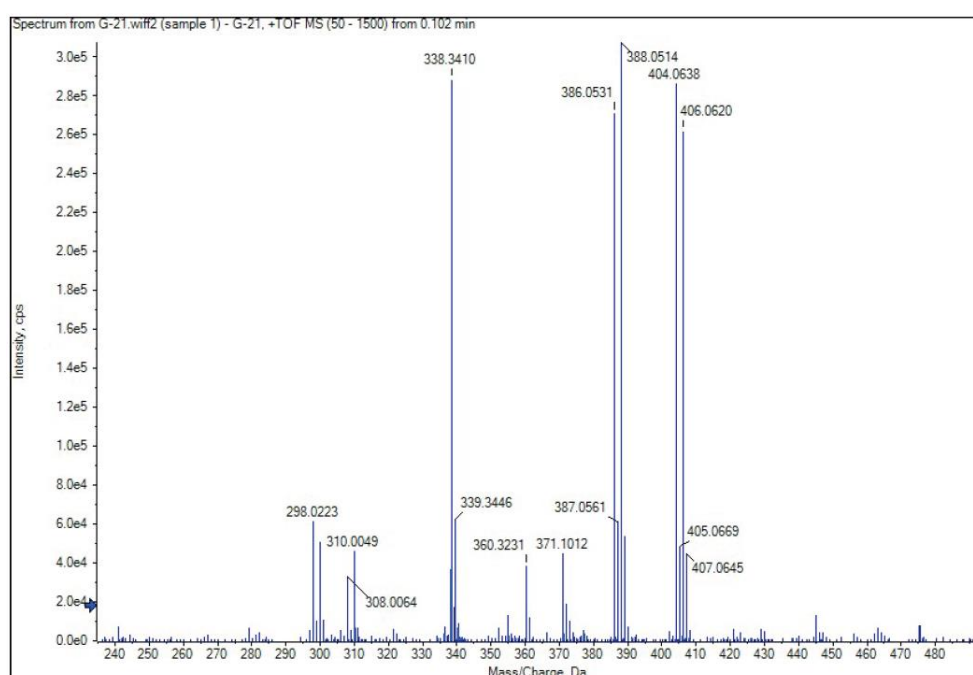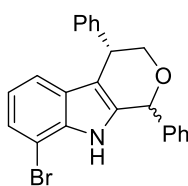

**8B**

**Isomer (8B)** was prepared as a colorless oil (55% yield, 95% ee).

[α]<sub>D</sub><sup>25</sup>: +28.8 (c = 3.0, CH<sub>2</sub>Cl<sub>2</sub>). HPLC analysis of the product: Daicel CHIRALPAK® AS-H column; 5% *i*-PrOH in *n*-hexane; 1.0 mL/min; retention times: 9.7 min (minor), 13.9 min (major).

<sup>1</sup>H NMR (400 MHz, CDCl<sub>3</sub>) 7.81 (s, 1H), 7.44 – 7.19 (m, 11H), 7.06 (d, *J* = 8.1 Hz, 1H), 6.83 (t, *J* = 7.8 Hz, 1H), 5.84 (s, 1H), 4.27 – 4.05 (m, 3H) ppm.

$^{13}\text{C}$  NMR (100 MHz,  $\text{CDCl}_3$ )  $\delta$  142.4, 138.9, 135.0, 134.9, 129.2, 129.1, 128.63, 128.58, 128.4, 127.9, 126.8, 124.6, 121.1, 118.7, 112.6, 104.7, 75.7, 70.8, 40.2 ppm.

HRMS (ESI+) Calcd for  $\text{C}_{22}\text{H}_{19}\text{BrNO}$   $[\text{M}+\text{H}]^+$ : 404.0645, found: 404.0637.

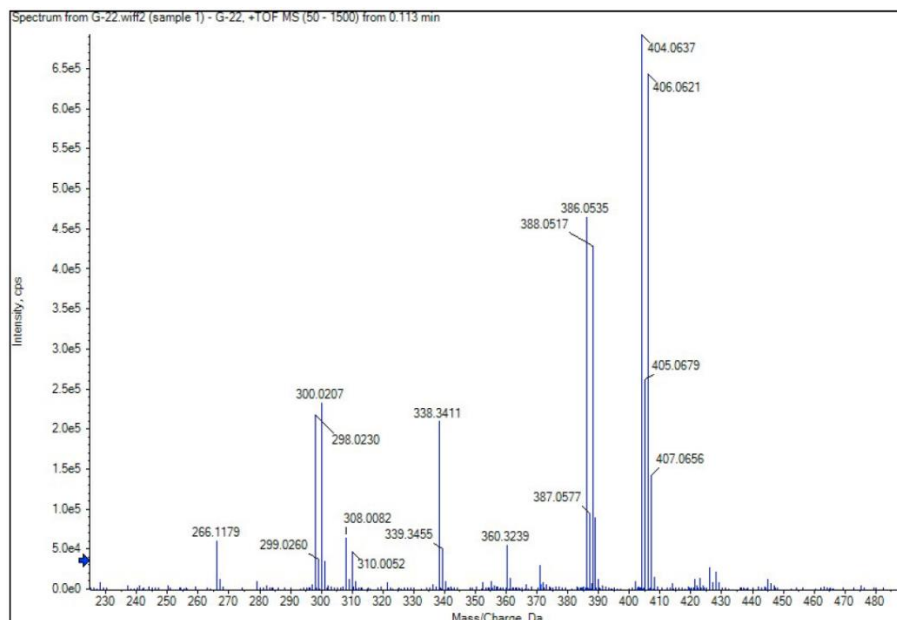

### Synthetic Transformations: Synthesis of 9

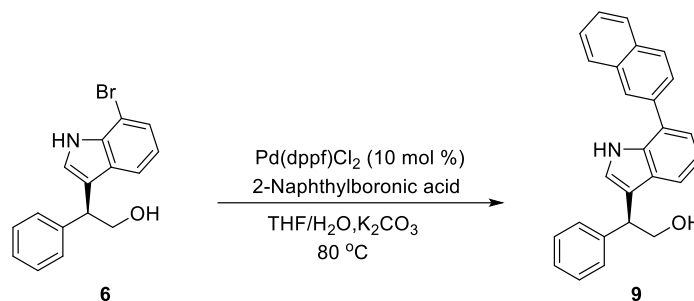

To a suspension of **6** (63.2 mg, 0.2 mmol, 1.0 equiv, 96% ee), 2-naphthylboronic acid (41.3 mg, 0.24 mmol, 1.2 equiv), and  $\text{K}_2\text{CO}_3$  (82.8 mg, 0.6 mmol, 3.0 equiv) in a mixture solvent of THF and water (5 mL,  $v/v = 4:1$ ) was added  $\text{Pd}(\text{dppf})\text{Cl}_2$  (14.6 mg, 0.02 mmol, 10 mol %). The mixture was degassed using freeze-pump-thaw cycles (3 times) (freeze-pump-thaw: cooled to  $-78\text{ }^\circ\text{C}$  and degassed *via* vacuum evacuation for 5 min, backfilled with nitrogen, and warm to room temperature) and then stirred for 12 h at  $80\text{ }^\circ\text{C}$ . After cooling to room temperature, the mixture was diluted with EtOAc (20 mL), and washed successively with water and brine. The combined organic layers were dried

over anhydrous Na<sub>2</sub>SO<sub>4</sub>, filtered, and concentrated in reduced pressure. The residue was purified by column chromatography on silica gel (eluent: hexanes/ethyl acetate = 5:1) to afford the desired product **9**.

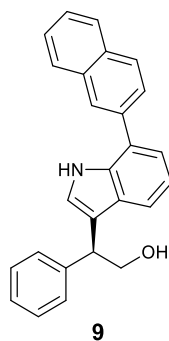

**(S)-2-(7-(Naphthalen-2-yl)-1H-indol-3-yl)-2-phenylethan-1-ol (9)** was prepared as a colorless oil (55.2 mg, 76% yield, 96% ee).

[ $\alpha$ ]<sub>D</sub><sup>25</sup>: +100.5 (*c* = 2.0, CH<sub>2</sub>Cl<sub>2</sub>). HPLC analysis of the product: Daicel CHIRALPAK® AD-H column; 15% *i*-PrOH in *n*-hexane; 1.0 mL/min; retention times: 30.0 min (minor), 61.3 min (major).

<sup>1</sup>H NMR (400 MHz, CDCl<sub>3</sub>) 8.26 (s, 1H), 7.90 (s, 1H), 7.82 – 7.72 (m, 3H), 7.58 – 7.56 (m, 1H), 7.41 – 7.32 (m, 3H), 7.22 – 7.15 (m, 5H), 7.11 – 7.01 (m, 2H), 6.871 – 6.866 (m, 1H), 4.34 (t, *J* = 6.8 Hz 1H), 4.09 – 3.97 (m, 2H), 1.64 (br, 1H) ppm.

<sup>13</sup>C NMR (100 MHz, CDCl<sub>3</sub>)  $\delta$  141.7, 136.6, 134.6, 133.8, 132.7, 128.9, 128.7, 128.4, 128.1, 127.9, 127.6, 126.91, 126.86, 126.7, 126.6, 126.2, 125.7, 122.6, 122.3, 120.2, 118.8, 116.5, 66.5, 45.7 ppm.

HRMS (ESI+) Calcd for C<sub>26</sub>H<sub>22</sub>NO [M+H]<sup>+</sup>: 364.1696, found: 364.1692.



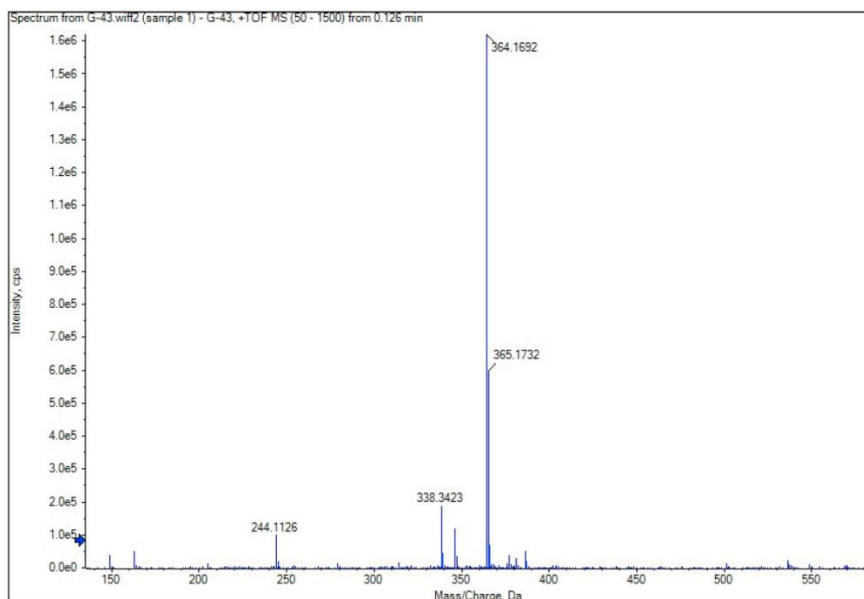

## VII. Mechanistic Study

### NMR Titration Experiment

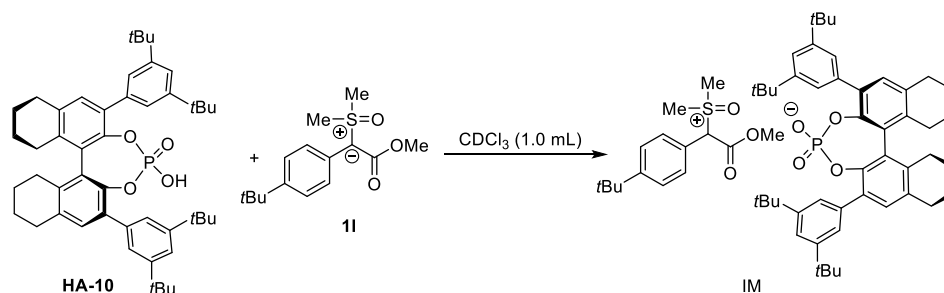

| entry | CPA [M] | Ylide [M]      | $\Delta m$ (mg) | Ylide/CPA | $\delta(^{31}\text{P NMR})$ ppm |
|-------|---------|----------------|-----------------|-----------|---------------------------------|
| 1     | 0.05    | 0              | -               | 0         | 1.31                            |
| 2     | 0.05    | 0.005 (1.4 mg) | 0               | 0.1       | 1.37                            |
| 3     | 0.05    | 0.01 (2.8 mg)  | 1.4 mg          | 0.2       | 1.38                            |
| 4     | 0.05    | 0.02 (5.6 mg)  | 2.8 mg          | 0.4       | 1.64                            |
| 5     | 0.05    | 0.03 (8.5 mg)  | 2.8 mg          | 0.6       | 1.9                             |
| 6     | 0.05    | 0.04 (11.3 mg) | 2.8 mg          | 0.8       | 2.19                            |
| 7     | 0.05    | 0.05 (14.1 mg) | 2.8 mg          | 1.0       | 2.68                            |
| 8     | 0.05    | 0.06 (16.9 mg) | 2.8 mg          | 1.2       | 3.14                            |
| 9     | 0.05    | 0.07 (19.8 mg) | 2.8 mg          | 1.4       | 3.76                            |
| 10    | 0.05    | 0.08 (22.6 mg) | 2.8 mg          | 1.6       | 4.14                            |
| 11    | 0.05    | 0.09 (25.4 mg) | 2.8 mg          | 1.8       | 4.14                            |
| 12    | 0.05    | 0.1 (28.2 mg)  | 2.8 mg          | 2.0       | 4.14                            |

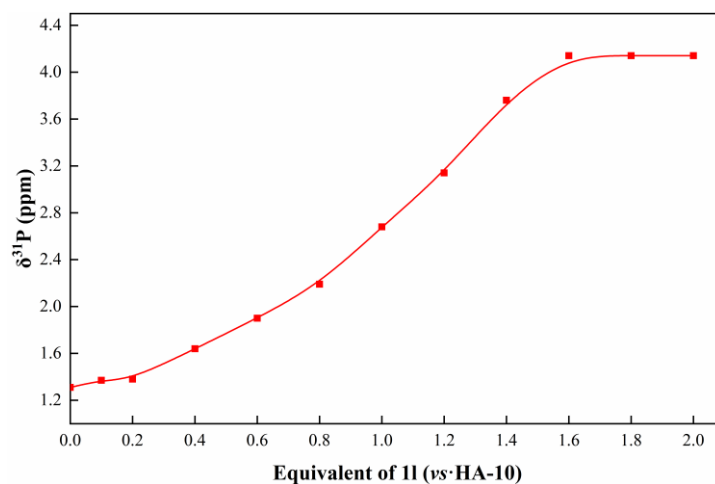

### Kinetic Isotope Effects at Natural Abundance

The  $^{13}\text{C}$  NMR analysis of the virgin and recovered samples of 5-methyl indole (**2d**) was performed following Singleton's method at natural abundance.<sup>7</sup> The NMR samples were prepared in an identical fashion by weighing out 20 mg of **2d** in a 5 mm high precision NMR tube and adding 0.5 mL  $\text{CDCl}_3$ . A T1 determination by the inverse-recovery method was performed on each sample before analysis and any sample that showed significantly different T1 values was omitted. The  $^{13}\text{C}$  NMR spectra were recorded with inverse gated decoupling and calibrated  $45^\circ$  pulses. A 60 s delay time between pulses was used to minimize any T1 variations ( $d_1 = 60$  s,  $at = 5.0$  s,  $np = 255170$ ,  $nt = 720$ ). All NMR data is summarized below in Table S2. Only a zero-order baseline correction was applied to each spectrum and the integration region for each peak was five times the peak width at half height.

(7) D. A. Singleton, A. A. Thomas, *J. Am. Chem. Soc.*, 1995, **117**, 9357–9358.

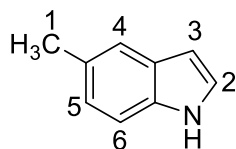

**Table S2 <sup>13</sup>C Integrations of Recovered and Virgin Samples of 5-Methyl Indole (2d).**

| <b>Run 1</b> |        |                 |                  |          |
|--------------|--------|-----------------|------------------|----------|
| C#           | Virgin | Recovered (69%) | R/R <sub>0</sub> | % Change |
| 1            | 1.000  | 1.000           | 1.000            | 0.00     |
| 2            | 0.998  | 1.002           | 1.004            | 0.40     |
| 3            | 1.001  | 1.023           | 1.022            | 2.20     |
| 4            | 0.998  | 1.002           | 1.004            | 0.40     |
| 5            | 0.994  | 1.001           | 1.007            | 0.70     |
| 6            | 1.004  | 1.003           | 0.999            | -0.10    |
| <b>Run 2</b> |        |                 |                  |          |
| C#           | Virgin | Recovered (73%) | R/R <sub>0</sub> | % Change |
| 1            | 1.000  | 1.000           | 1.000            | 0.00     |
| 2            | 0.998  | 1.003           | 1.005            | 0.50     |
| 3            | 1.001  | 1.029           | 1.028            | 2.80     |
| 4            | 0.998  | 0.996           | 0.998            | -0.20    |
| 5            | 0.994  | 1.002           | 1.008            | 0.80     |
| 6            | 1.004  | 1.001           | 0.997            | -0.30    |
| <b>Run 3</b> |        |                 |                  |          |
| C#           | Virgin | Recovered (71%) | R/R <sub>0</sub> | % Change |
| 1            | 1.000  | 1.000           | 1.000            | 0.00     |
| 2            | 0.998  | 1.004           | 1.006            | 0.60     |
| 3            | 1.001  | 1.038           | 1.037            | 3.70     |
| 4            | 0.998  | 0.998           | 1.000            | 0.00     |
| 5            | 0.994  | 1.001           | 1.007            | 0.70     |
| 6            | 1.004  | 0.998           | 0.994            | -0.60    |

## Eyring Plot Analysis

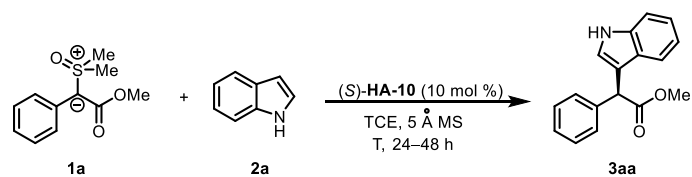

| T/K | T/°C | ee (%) | e.r.     | 10 <sup>3</sup> /T (K <sup>-1</sup> ) | ln(e.r.) |
|-----|------|--------|----------|---------------------------------------|----------|
| 313 | 40   | 89     | 94.5:5.5 | 3.19                                  | 2.84     |
| 323 | 50   | 87     | 93.5:6.5 | 3.10                                  | 2.67     |
| 333 | 60   | 85     | 92.5:7.5 | 3.00                                  | 2.51     |
| 343 | 70   | 82     | 91:9     | 2.92                                  | 2.31     |

Note: Apart from the temperature variation, all other parameters are maintained in accordance with the optimal reaction conditions.

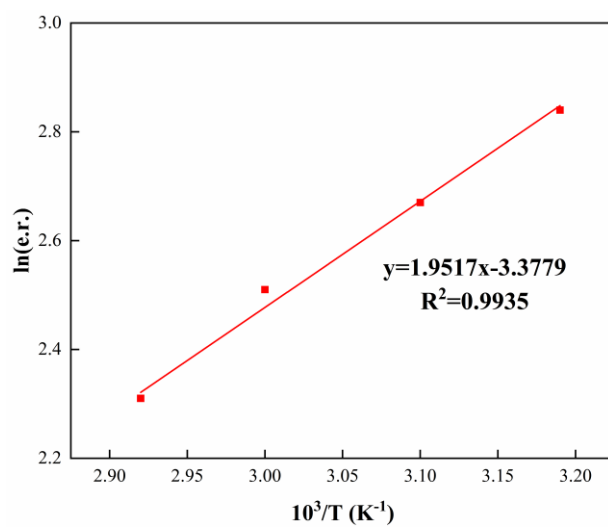

## Nonlinear Effect Study

| ee of (S)-HA-10 (%) | ee of 3aa (%) |
|---------------------|---------------|
| 100                 | 89            |
| 80                  | 69            |
| 60                  | 52            |
| 40                  | 36            |
| 20                  | 18            |
| 0                   | 0             |

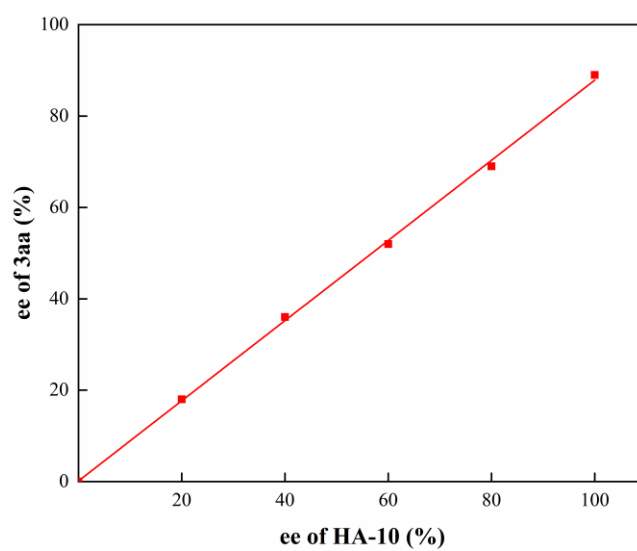

## VIII. DFT Calculations

All DFT calculations were carried out with the Gaussian 16 package.<sup>8</sup> All molecular geometries were optimized with the B3LYP-D3(BJ) method and the 6-31G(d) basis set was used for all atoms involved.<sup>9</sup> Single point energies were calculated at B3LYP-D3(BJ)/6-311++G(d,p)/SMD(CHCl<sub>3</sub>) level of theory with the optimized structure.<sup>10</sup> The reported free energies and electronic energies were obtained from the above-mentioned single-point calculations combined with the liquid-phase free-energy and ZPE corrections, respectively. Frequency analysis was then performed on the optimized structure. Intrinsic reaction coordinate (IRC) calculation was carried out on the transition state geometries to verify that they are connected to the expected minima.<sup>11</sup> The conformational search was employed with CREST.<sup>12</sup> All energies discussed are Gibbs free relative energies at 313 K and 1 atm in kcal mol<sup>-1</sup>. 3D structures shown in figures were generated by CYLview<sup>13</sup> and VMD.<sup>14</sup> The buried value calculations were performed by Cavallo's SambVca 2.0.<sup>15</sup> The NCI analysis was calculated by Multiwfn.<sup>16</sup>

- 
- (8) M. J. Frisch, G. W. Trucks, H. B. Schlegel, G. E. Scuseria, M. A. Robb, J. R. Cheeseman, G. Scalmani, V. Barone, G. A. Petersson, H. Nakatsuji, X. Li, M. Caricato, A. V. Marenich, J. Bloino, B. G. Janesko, R. Gomperts, B. Mennucci, H. P. Hratchian, J. V. Ortiz, A. F. Izmaylov, J. L. Sonnenberg, D. Williams-Young, F. Ding, F. Lipparini, F. Egidi, J. Goings, B. Peng, A. Petrone, T. Henderson, D. Ranasinghe, V. G. Zakrzewski, J. Gao, N. Rega, G. Zheng, W. Liang, M. Hada, M. Ehara, K. Toyota, R. Fukuda, J. Hasegawa, M. Ishida, T. Nakajima, Y. Honda, O. Kitao, H. Nakai, T. Vreven, K. Throssell, J. A. Montgomery, J. E. Peralta, F. Ogliaro, M. J. Bearpark, J. J. Heyd, E. N. Brothers, K. N. Kudin, V. N. Staroverov, T. A. Keith, R. Kobayashi, J. Normand, K. Raghavachari, A. P. Rendell, J. C. Burant, S. S. Iyengar, J. Tomasi, M. Cossi, J. M. Millam, M. Klene, C. Adamo, R. Cammi, J. W. Ochterski, R. L. Martin, K. Morokuma, O. Farkas, J. B. Foresman, D. J. Fox, *Gaussian 16 Revision C.01*, Gaussian, Inc., Wallingford CT 2019.
- (9) (a) S. Grimme, J. Antony, S. Ehrlich, H. Krieg, *J. Chem. Phys.*, 2010, **132**, 154104–154119. (b) S. Grimme, S. Ehrlich, L. Goerigk, *J. Comput. Chem.*, 2011, **32**, 1456–1465.
- (10) (a) Y. Zhao, D. G. Truhlar, *Theor. Chem. Acc.*, 2008, **120**, 215–241. (b) A. V. Marenich, C. J. Cramer, D. G. Truhlar, *J. Phys. Chem., B*, 2009, **113**, 6378–6396.
- (11) C. Gonzalez, H. B. Schlegel, *J. Chem. Phys.*, 1989, **90**, 2154–2161.
- (12) P. Pracht, F. Bohle, S. Grimme, *Phys. Chem. Chem. Phys.*, 2020, **22**, 7169–7192.
- (13) CYLview20; Legault, C. Y., Université de Sherbrooke 2020. (<http://www.cylview.org>).
- (14) W. Humphrey, A. Dalke, K. Schulten, *J. Molec. Graphics.*, 1996, **14**, 33–38.
- (15) L. Falivene, R. Credendino, A. Poater, A. Petta, L. Serra, R. Oliva, V. Scarano, L. Cavallo, *Organometallics* 2016, **35**, 2286–2293.
- (16) T. Lu, F. Chen, *J. Comput. Chem.*, 2012, **22**, 580–592.

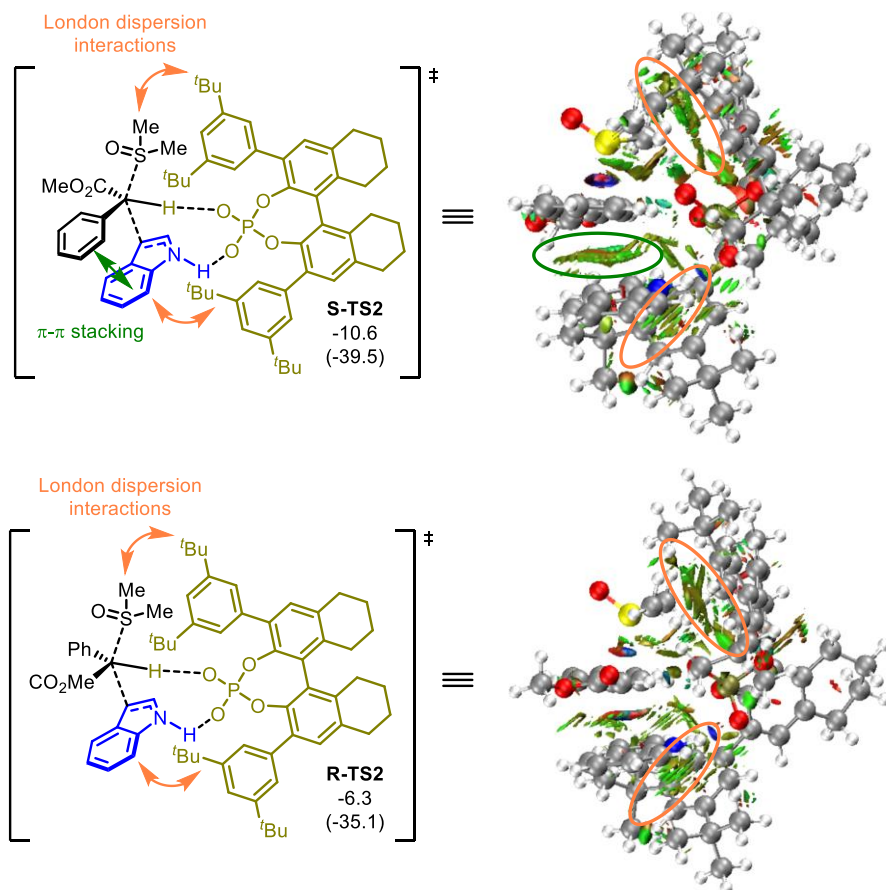

**Fig. S1.** NCI plots of interactions for enantioselective transition states. Isosurfaces are color-coded red (indicating strong repulsion), blue (strong attractive interactions), and green (corresponding to weak interactions).

**Table S3 Enantioselectivities for the S<sub>N</sub>2 Step of *H*<sub>8</sub>-BINOL-Derived Phosphoric Acid Catalyst with Various Substituents.**

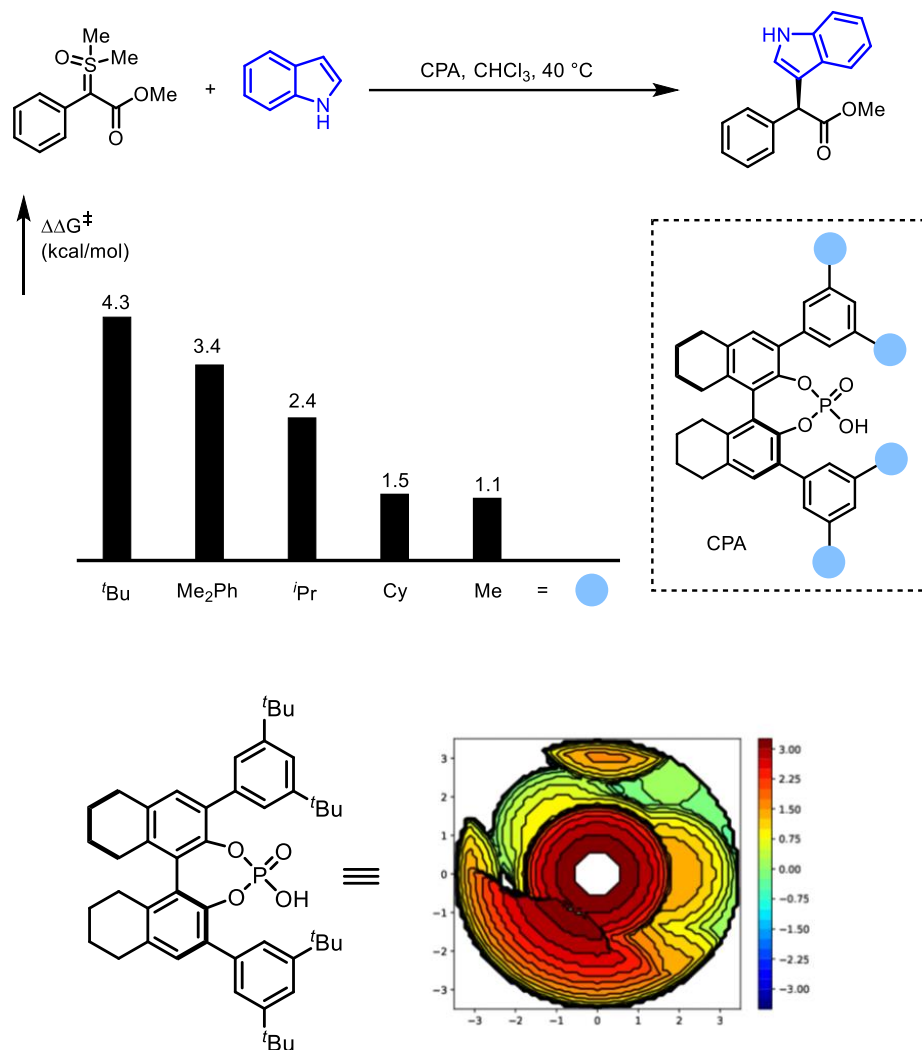

**Fig. S2.** Buried volume for *H*<sub>8</sub>-BINOL-derived phosphoric acid catalyst

The corresponding buried volume calculations were performed by Cavallo's SambVca 2.0 web tool (<https://www.molnac.unisa.it/OMtools/sambvca2.0/>). The parameter settings are shown as following: cartesian coordinate was generated from Gaussian .log output file and exported as .xyz file; atom coordinated to center of sphere: P; atom for z-axis definition: P=O; atom for x-z plane definition: The plane of P-OH; atom to be deleted: NA; bond radii scaled by 1.17; sphere radius set: 3.5 Å; distance of the coordination point from the center of the sphere: 0.0 Å; mesh spacing for numerical integration: 0.10; no H atom was included in calculation.



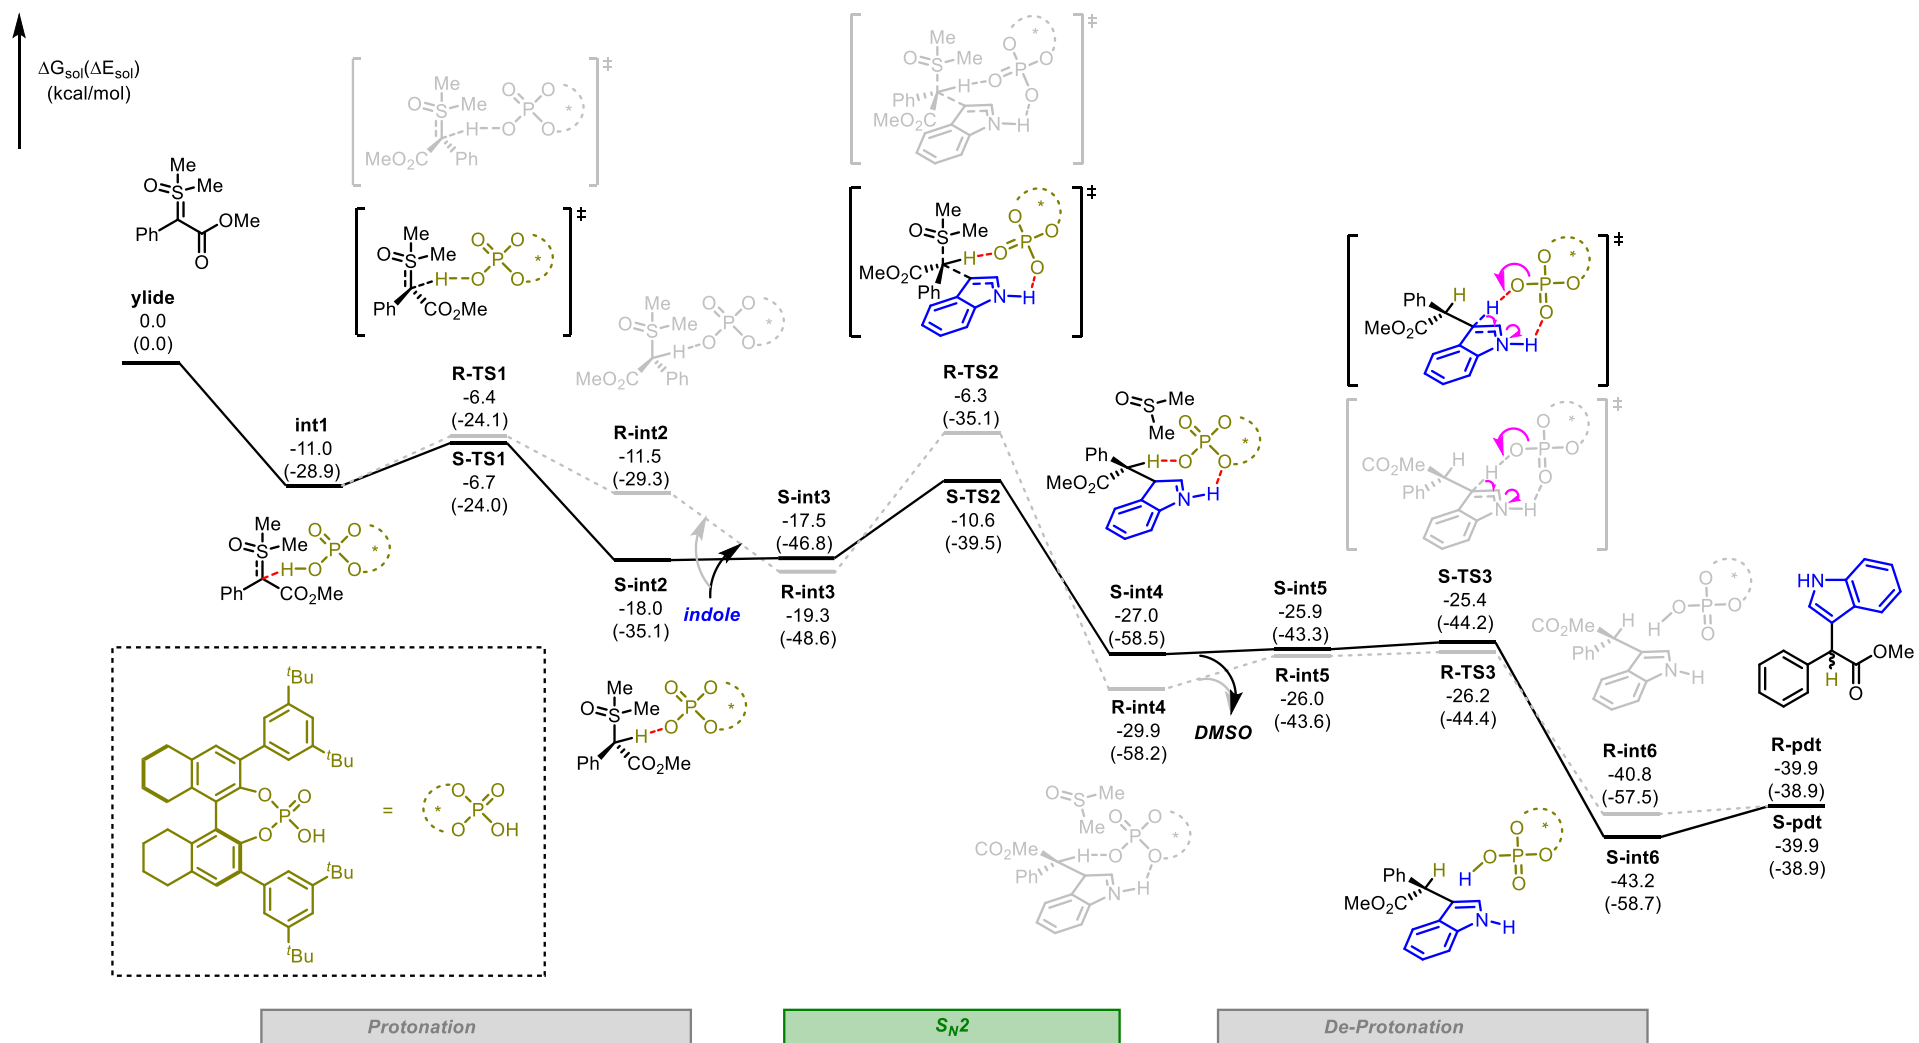

**Fig. S3.** Complete energy profile in the level of B3LYP-D3(BJ)/6-311++G(d,p)/SMD(CHCl<sub>3</sub>)/313K//B3LYP-D3(BJ)/6-31G(d) theory.

## Energies

**Table S4 Absolute Electronic Energies, Thermal Corrections to Energies and Free Energies at 313 K (in Hartree) of all Stationary Points. Geometries were Optimized in the Level of B3LYP-D3(BJ)/6-31G(d). Free Energies were Obtained from the Single Point SMD Calculation in Trichloromethane by SMD Model at the Level of B3LYP-D3(BJ)/6-311++G(d,p)/313K Combined with the Gas-Phase Free-Energy Correction Mentioned Above.**

|                 | <b>E+ZPE</b> | <b>E</b>     | <b>G</b>     |
|-----------------|--------------|--------------|--------------|
| <b>Indole</b>   | -363.8289359 | -363.8226049 | -363.8592799 |
| <b>Ylide</b>    | -1051.424449 | -1051.408513 | -1051.468599 |
| <b>DMSO</b>     | -553.2127203 | -553.2070723 | -553.2410583 |
| <b>S-cat</b>    | -2508.173561 | -2508.120995 | -2508.260801 |
| <b>Int1</b>     | -3559.644227 | -3559.575602 | -3559.746894 |
| <b>S-int2</b>   | -3559.654319 | -3559.585364 | -3559.758161 |
| <b>R-int2</b>   | -3559.645147 | -3559.5762   | -3559.747723 |
| <b>S-int3</b>   | -3923.503685 | -3923.426763 | -3923.616522 |
| <b>R-int3</b>   | -3923.506288 | -3923.429515 | -3923.619462 |
| <b>S-int4</b>   | -3923.520036 | -3923.443418 | -3923.631765 |
| <b>R-int4</b>   | -3923.521758 | -3923.444815 | -3923.636389 |
| <b>S-int5</b>   | -3370.283715 | -3370.214121 | -3370.388912 |
| <b>R-int5</b>   | -3370.284217 | -3370.214528 | -3370.389075 |
| <b>S-int6</b>   | -3370.30893  | -3370.238664 | -3370.416419 |
| <b>R-int6</b>   | -3370.306984 | -3370.236743 | -3370.412693 |
| <b>S-TS1</b>    | -3559.636521 | -3559.567828 | -3559.740061 |
| <b>R-TS1</b>    | -3559.636746 | -3559.567944 | -3559.739678 |
| <b>S-TS2</b>    | -3923.49211  | -3923.415125 | -3923.605495 |
| <b>R-TS2</b>    | -3923.484959 | -3923.408038 | -3923.598777 |
| <b>S-TS3</b>    | -3370.284342 | -3370.215405 | -3370.388026 |
| <b>R-TS3</b>    | -3370.285067 | -3370.215724 | -3370.389339 |
| <b>S-pdt</b>    | -862.1030573 | -862.0860803 | -862.1504793 |
| <b>R-pdt</b>    | -862.1030582 | -862.0860812 | -862.1504812 |
| <b>S-Me-cat</b> | -2036.553807 | -2036.515795 | -2036.627842 |
| <b>Me-R-TS2</b> | -3451.859698 | -3451.797434 | -3451.960633 |

|                               |              |              |              |
|-------------------------------|--------------|--------------|--------------|
| <b>Me-S-TS2</b>               | -3451.859648 | -3451.797244 | -3451.962402 |
| <b>S-Cy-cat</b>               | -2817.840589 | -2817.7861   | -2817.934818 |
| <b>Cy-R-TS2</b>               | -4233.156407 | -4233.077734 | -4233.275349 |
| <b>Cy-S-TS2</b>               | -4233.158849 | -4233.080043 | -4233.277773 |
| <b>S-<i>i</i>Pr-cat</b>       | -2350.968783 | -2350.920787 | -2351.053626 |
| <b><i>i</i>Pr-R-TS2</b>       | -3766.280741 | -3766.208739 | -3766.390505 |
| <b><i>i</i>Pr-S-TS2</b>       | -3766.283134 | -3766.210967 | -3766.394256 |
| <b>S-Me<sub>2</sub>Ph-cat</b> | -3275.190977 | -3275.125785 | -3275.299016 |
| <b>Me<sub>2</sub>Ph-R-TS2</b> | -4690.503501 | -4690.413989 | -4690.63596  |
| <b>Me<sub>2</sub>Ph-S-TS2</b> | -4690.512827 | -4690.42373  | -4690.641353 |

**Table S5 Relative Electronic Energies, Thermal Corrections to Energies and Free Energies at 313 K (in kcal/mol) of all Stationary Points. Geometries were Optimized in the Level of B3LYP-D3(BJ)/6-31G(d). Free Energies were Obtained from the Single Point SMD Calculation in Trichloromethane by SMD Model at the Level of B3LYP-D3(BJ)/6-311++G(d,p)/313K Combined with the Gas-Phase Free-Energy Correction Mentioned Above.**

|               | <b>E+ZPE</b> | <b>E</b> | <b>G</b> |
|---------------|--------------|----------|----------|
| <b>Int1</b>   | -29.0        | -28.9    | -11.0    |
| <b>S-int2</b> | -35.3        | -35.1    | -18.0    |
| <b>R-int2</b> | -29.6        | -29.3    | -11.5    |
| <b>S-int3</b> | -48.2        | -46.8    | -17.5    |
| <b>R-int3</b> | -49.8        | -48.6    | -19.3    |
| <b>S-int4</b> | -58.4        | -57.3    | -27.0    |
| <b>R-int4</b> | -59.5        | -58.2    | -29.9    |
| <b>S-int5</b> | -43.6        | -43.3    | -25.9    |
| <b>R-int5</b> | -43.9        | -43.6    | -26.0    |
| <b>S-int6</b> | -59.4        | -58.7    | -43.2    |
| <b>R-int6</b> | -58.2        | -57.5    | -40.8    |
| <b>S-TS1</b>  | -24.2        | -24.0    | -6.7     |
| <b>R-TS1</b>  | -24.3        | -24.1    | -6.4     |
| <b>S-TS2</b>  | -40.9        | -39.5    | -10.6    |
| <b>R-TS2</b>  | -36.4        | -35.1    | -6.3     |

|                               |       |       |       |
|-------------------------------|-------|-------|-------|
| <b>S-TS3</b>                  | -44.0 | -44.2 | -25.4 |
| <b>R-TS3</b>                  | -44.5 | -44.4 | -26.2 |
| <b>S-pdt</b>                  | -39.2 | -38.9 | -39.9 |
| <b>R-pdt</b>                  | -39.2 | -38.9 | -39.9 |
| <b>Me-R-TS2</b>               | -32.9 | -31.7 | -3.1  |
| <b>Me-S-TS2</b>               | -32.9 | -31.6 | -4.2  |
| <b>Cy-R-TS2</b>               | -39.2 | -38.0 | -7.9  |
| <b>Cy-S-TS2</b>               | -40.7 | -39.4 | -9.5  |
| <b><i>i</i>Pr-R-TS2</b>       | -36.8 | -35.7 | -5.6  |
| <b><i>i</i>Pr-S-TS2</b>       | -38.3 | -37.1 | -8.0  |
| <b>Me<sub>2</sub>Ph-R-TS2</b> | -37.1 | -35.8 | -5.7  |
| <b>Me<sub>2</sub>Ph-S-TS2</b> | -43.0 | -41.9 | -9.1  |

### Cartesian Coordinates (Å)

#### Indole

|   |             |             |             |
|---|-------------|-------------|-------------|
| C | 0.24946700  | 0.75180000  | -0.00008300 |
| C | 0.24701800  | -0.67250300 | -0.00011900 |
| C | -0.93513900 | -1.41857700 | -0.00010800 |
| C | -2.13542700 | -0.71813300 | 0.00003800  |
| C | -2.15843500 | 0.69167800  | 0.00026200  |
| C | -0.98186700 | 1.42875800  | -0.00019800 |
| C | 1.62556900  | 1.16682500  | -0.00011400 |
| C | 2.39082200  | 0.03041300  | 0.00019800  |
| H | -0.91734600 | -2.50519000 | -0.00068000 |
| H | -3.07272500 | -1.26711400 | -0.00036700 |
| H | -3.11518100 | 1.20612900  | 0.00071500  |
| H | -1.00947600 | 2.51512800  | 0.00018700  |
| H | 1.99624100  | 2.18230700  | -0.00026200 |
| H | 3.46528900  | -0.08716800 | -0.00014400 |
| N | 1.56599700  | -1.08101300 | 0.00003400  |
| H | 1.87916600  | -2.03855800 | 0.00106500  |

**Ylide**

|   |             |             |             |
|---|-------------|-------------|-------------|
| C | 1.19894600  | 1.32103100  | 0.11606500  |
| C | 0.41935300  | 0.12005700  | -0.05348300 |
| O | 2.42064800  | 1.39961500  | 0.24435000  |
| S | 1.25584000  | -1.34544300 | 0.04586500  |
| O | 1.51088000  | -2.03692200 | 1.34119300  |
| C | 0.33602000  | -2.48702500 | -1.01871800 |
| H | 0.27528000  | -2.07699600 | -2.02772800 |
| H | 0.87168400  | -3.43779700 | -0.99570500 |
| H | -0.66097000 | -2.60142300 | -0.59503100 |
| C | 2.83054300  | -1.20302600 | -0.83466800 |
| H | 3.25666200  | -2.20826000 | -0.85445300 |
| H | 2.65072900  | -0.81407000 | -1.83770100 |
| H | 3.44120100  | -0.50694900 | -0.26474500 |
| C | -1.06067700 | 0.05017000  | -0.00194000 |
| C | -1.83764300 | 0.75655900  | -0.93635500 |
| C | -1.72637900 | -0.73792800 | 0.95398500  |
| C | -3.22736500 | 0.67791500  | -0.91396200 |
| H | -1.33614400 | 1.37512400  | -1.67292800 |
| C | -3.11807300 | -0.84304600 | 0.95326800  |
| H | -1.14243800 | -1.26080700 | 1.70662700  |
| C | -3.87501100 | -0.13193600 | 0.02276400  |
| H | -3.80852500 | 1.23909600  | -1.64095700 |
| H | -3.60965600 | -1.46398700 | 1.69738700  |
| H | -4.95911600 | -0.20124700 | 0.02996100  |
| O | 0.41317000  | 2.43459900  | 0.09976500  |
| C | 1.11596000  | 3.66922000  | 0.26601800  |
| H | 0.34818900  | 4.44405400  | 0.24515800  |
| H | 1.65194100  | 3.68741300  | 1.21892700  |
| H | 1.83609500  | 3.82266500  | -0.54297100 |

**DMSO**

|   |             |             |             |
|---|-------------|-------------|-------------|
| S | -0.25814200 | 0.43272000  | 0.00000000  |
| O | 1.09424300  | 1.10685400  | 0.00000000  |
| C | -0.25814200 | -0.80146400 | 1.35869600  |
| H | -1.17707400 | -1.39438000 | 1.32367900  |
| H | 0.62445200  | -1.44112900 | 1.26650700  |
| H | -0.21036000 | -0.24488400 | 2.29741700  |
| C | -0.25814200 | -0.80146400 | -1.35869600 |
| H | 0.62445200  | -1.44112900 | -1.26650700 |
| H | -1.17707400 | -1.39438000 | -1.32367900 |
| H | -0.21036000 | -0.24488400 | -2.29741700 |

**S-cat**

|   |             |             |             |
|---|-------------|-------------|-------------|
| C | -1.94425200 | -1.05459700 | 1.49681400  |
| C | -2.75492500 | 0.09366100  | 1.48251200  |
| H | -0.60587000 | -2.30695600 | 0.37956500  |
| C | -1.24540700 | -1.42909200 | 0.35531600  |
| C | -2.86644900 | 0.85634200  | 0.30386800  |
| C | -2.22990100 | 0.37551800  | -0.85804800 |
| C | -1.38502200 | -0.74105400 | -0.85778700 |
| C | -3.63031100 | 2.14029100  | 0.25075200  |
| C | -3.32734100 | 3.25408900  | 1.05874500  |
| C | -4.63660200 | 2.29055200  | -0.71134700 |
| C | -2.18683800 | 3.31528600  | 2.04561000  |
| C | -4.06175200 | 4.44545000  | 0.90519100  |
| C | -5.34811700 | 3.47725500  | -0.92166500 |
| C | -2.61204000 | 3.91785600  | 3.40579500  |
| H | -1.41079000 | 3.96209100  | 1.61040600  |
| C | -3.70419100 | 5.59864000  | 1.80917100  |
| C | -5.05768800 | 4.54319900  | -0.06150100 |

|   |             |             |             |
|---|-------------|-------------|-------------|
| C | -3.58734000 | 5.11548500  | 3.26581300  |
| H | -3.08514100 | 3.13933000  | 4.01189100  |
| H | -2.74300600 | 6.03237100  | 1.49406500  |
| H | -5.60524900 | 5.47489000  | -0.17535900 |
| H | -4.58679600 | 4.81722600  | 3.60208400  |
| H | -4.44909400 | 6.39728500  | 1.72561300  |
| H | -3.27423700 | 5.94468800  | 3.90947100  |
| H | -1.70684100 | 4.22020100  | 3.94403100  |
| H | -1.71856800 | 2.34032800  | 2.18653800  |
| C | -3.54225200 | 0.36217700  | 2.74383500  |
| H | -4.04776400 | 1.32883500  | 2.70640800  |
| H | -4.34240400 | -0.39146900 | 2.78709500  |
| C | -2.69700700 | 0.23889500  | 4.03604700  |
| H | -3.38000600 | 0.04311700  | 4.87025500  |
| H | -2.21702300 | 1.19798100  | 4.25216700  |
| C | -1.61177900 | -0.86321400 | 3.95825000  |
| H | -1.55956800 | -1.41721400 | 4.90194600  |
| H | -0.62860500 | -0.40173000 | 3.80950600  |
| C | -1.85700300 | -1.82995300 | 2.78710300  |
| H | -2.79493200 | -2.37956900 | 2.95933200  |
| H | -1.06104300 | -2.58017900 | 2.72982800  |
| C | -0.61571300 | -1.19138700 | -2.04694600 |
| C | -1.22779800 | -1.41605000 | -3.28288700 |
| C | 0.75601800  | -1.43577100 | -1.91115300 |
| C | -0.49141200 | -1.86734900 | -4.38228300 |
| H | -2.29109300 | -1.24883400 | -3.38445800 |
| C | 1.52413500  | -1.89247600 | -2.98674000 |
| H | 1.22404100  | -1.24486100 | -0.95013000 |
| C | 0.87949000  | -2.09939400 | -4.21278000 |
| H | 1.45869900  | -2.44938200 | -5.05531300 |

|   |              |             |             |
|---|--------------|-------------|-------------|
| C | -6.23891000  | 3.64234800  | -2.09630500 |
| C | -6.12333400  | 4.80711800  | -2.87610800 |
| C | -7.11000000  | 2.63350500  | -2.51362700 |
| C | -6.84827000  | 4.96282500  | -4.05720900 |
| H | -5.42007600  | 5.56713100  | -2.55975600 |
| C | -7.83478000  | 2.74166300  | -3.70879200 |
| H | -7.19708100  | 1.73819200  | -1.91261900 |
| C | -7.69021800  | 3.91066300  | -4.45866500 |
| H | -8.23685100  | 4.01195000  | -5.38783900 |
| C | -8.70267200  | 1.56027100  | -4.16210600 |
| C | -7.78614200  | 0.33671500  | -4.39032600 |
| H | -7.22966100  | 0.06326900  | -3.48939200 |
| H | -8.38044200  | -0.53145200 | -4.69931800 |
| H | -7.04954600  | 0.54043200  | -5.17537700 |
| C | -9.45571600  | 1.85498100  | -5.46931300 |
| H | -10.06454500 | 0.98765900  | -5.74597800 |
| H | -10.12740400 | 2.71493100  | -5.36665000 |
| H | -8.76792900  | 2.05221800  | -6.29901400 |
| C | -9.74238900  | 1.23124800  | -3.06964500 |
| H | -9.26608500  | 0.96353100  | -2.12160100 |
| H | -10.40064400 | 2.08791200  | -2.88615500 |
| H | -10.36283400 | 0.38306800  | -3.38162500 |
| C | -6.73051800  | 6.21295500  | -4.94039100 |
| C | -6.19230100  | 5.80656400  | -6.32960200 |
| H | -6.85190800  | 5.08797300  | -6.82622800 |
| H | -6.10575500  | 6.68633700  | -6.97809200 |
| H | -5.20034300  | 5.34870300  | -6.24318400 |
| C | -5.77828300  | 7.26214400  | -4.34363800 |
| H | -6.11486600  | 7.59913600  | -3.35698000 |
| H | -4.75784100  | 6.87607800  | -4.24519700 |



|   |             |             |             |
|---|-------------|-------------|-------------|
| H | -5.73885600 | 8.13861200  | -4.99932400 |
| C | -8.12405700 | 6.85918000  | -5.09734400 |
| H | -8.06019700 | 7.75212000  | -5.73032000 |
| H | -8.84088600 | 6.17255000  | -5.55841400 |
| H | -8.52554500 | 7.15809800  | -4.12281400 |
| C | 3.02724100  | -2.13992000 | -2.79066500 |
| C | 3.71132300  | -2.64681400 | -4.07086300 |
| H | 3.62908800  | -1.92237000 | -4.88844900 |
| H | 4.77727500  | -2.81143300 | -3.87843900 |
| H | 3.28371500  | -3.59654700 | -4.41044800 |
| C | 3.71125500  | -0.82140500 | -2.36897500 |
| H | 3.58018200  | -0.05340600 | -3.13917400 |
| H | 3.29572500  | -0.43115900 | -1.43455800 |
| H | 4.78651800  | -0.97833900 | -2.21972400 |
| C | 3.23045800  | -3.19884400 | -1.68533900 |
| H | 2.80153800  | -2.87488000 | -0.73172700 |
| H | 2.75353400  | -4.14544100 | -1.96274300 |
| H | 4.29926600  | -3.38673800 | -1.52628100 |
| C | -1.20647500 | -2.06930300 | -5.72600400 |
| C | -2.41439800 | -3.01275600 | -5.53709600 |
| H | -2.09413000 | -3.98461400 | -5.14431200 |
| H | -3.15211500 | -2.58911500 | -4.85007500 |
| H | -2.91388600 | -3.18077500 | -6.49896000 |
| C | -1.71433400 | -0.69934300 | -6.22946900 |
| H | -0.88244700 | 0.00449300  | -6.34712400 |
| H | -2.20727300 | -0.81272400 | -7.20318700 |
| H | -2.43792800 | -0.26662300 | -5.53333800 |
| C | -0.28163800 | -2.67282500 | -6.79528300 |
| H | 0.56631800  | -2.01589500 | -7.01944800 |
| H | 0.11236700  | -3.64828400 | -6.48752700 |

|   |             |             |             |
|---|-------------|-------------|-------------|
| H | -0.84125100 | -2.81734200 | -7.72591300 |
| O | -2.39639300 | 1.08138100  | -2.06345000 |
| O | -4.87591500 | 1.20734700  | -1.56777300 |
| P | -3.83613700 | 1.02548400  | -2.79858700 |
| O | -4.19889500 | -0.15037000 | -3.61399400 |
| O | -3.73362900 | 2.43795600  | -3.55686200 |
| H | -4.55930600 | 2.64491500  | -4.02943400 |

### **Int1**

|   |             |            |             |
|---|-------------|------------|-------------|
| C | 2.03403500  | 2.47302300 | 2.91051300  |
| C | 0.74707500  | 2.64661500 | 2.37439800  |
| H | 3.74076400  | 1.17542000 | 3.04043000  |
| C | 2.75682400  | 1.31979900 | 2.60152200  |
| C | 0.25400100  | 1.70640300 | 1.43792000  |
| C | 0.98160900  | 0.52940200 | 1.21879200  |
| C | 2.23602600  | 0.30134300 | 1.80111400  |
| C | -1.02531500 | 1.95767700 | 0.71010900  |
| C | -1.21186900 | 3.12766200 | -0.06703800 |
| C | -2.05807500 | 1.02072900 | 0.78041800  |
| C | -0.03446000 | 4.03106900 | -0.38969000 |
| C | -2.48852700 | 3.39397200 | -0.58715000 |
| C | -3.32645100 | 1.23276400 | 0.21691900  |
| C | -0.31157800 | 4.95293900 | -1.57820000 |
| H | 0.84276600  | 3.41139300 | -0.58758100 |
| C | -2.78167500 | 4.63918200 | -1.40638700 |
| C | -3.51979700 | 2.46656700 | -0.40909700 |
| C | -1.64882900 | 5.66698200 | -1.38417700 |
| H | 0.51259100  | 5.66591700 | -1.68326000 |
| H | -2.96333900 | 4.33794500 | -2.44963900 |
| H | -4.50117700 | 2.69044100 | -0.81947900 |

|   |             |             |             |
|---|-------------|-------------|-------------|
| H | -1.64138800 | 6.19455700  | -0.41990100 |
| H | -3.72187400 | 5.08620000  | -1.05903700 |
| H | -1.81734400 | 6.42342600  | -2.15952000 |
| H | -0.33625800 | 4.35908300  | -2.50098200 |
| H | 0.22581700  | 4.65386100  | 0.47545800  |
| C | -0.14527900 | 3.75307000  | 2.91345300  |
| H | -0.86688900 | 4.08573000  | 2.16824200  |
| H | -0.74838800 | 3.31033000  | 3.72134400  |
| C | 0.63506300  | 4.93868100  | 3.48398800  |
| H | -0.05929100 | 5.64578900  | 3.95253000  |
| H | 1.13982500  | 5.47765800  | 2.66928300  |
| C | 1.67464500  | 4.44653300  | 4.49243000  |
| H | 1.16289600  | 3.90391400  | 5.29901000  |
| H | 2.20269800  | 5.28678200  | 4.95812700  |
| C | 2.67842900  | 3.51965800  | 3.80276000  |
| H | 3.31946100  | 3.02674800  | 4.54318600  |
| H | 3.35083400  | 4.12976600  | 3.18012300  |
| C | 3.02237400  | -0.93622200 | 1.56733500  |
| C | 2.47625400  | -2.19433000 | 1.83029300  |
| C | 4.33293900  | -0.84028000 | 1.07485400  |
| C | 3.21175100  | -3.36477500 | 1.59545100  |
| H | 1.46087300  | -2.25952200 | 2.19640000  |
| C | 5.09141600  | -1.98311400 | 0.81963900  |
| H | 4.73825700  | 0.14142400  | 0.86612200  |
| C | 4.50972100  | -3.23194400 | 1.09263400  |
| H | 5.09389900  | -4.12356900 | 0.90066700  |
| C | -4.37151500 | 0.18192300  | 0.18662700  |
| C | -5.14421000 | 0.02321900  | -0.97691200 |
| C | -4.58373000 | -0.68479000 | 1.25970300  |
| C | -6.10596900 | -0.97927000 | -1.07766900 |

|   |             |             |             |
|---|-------------|-------------|-------------|
| H | -4.95252400 | 0.68073000  | -1.81570200 |
| C | -5.52430600 | -1.71995200 | 1.18674300  |
| H | -3.99002700 | -0.56402500 | 2.15526100  |
| C | -6.27619700 | -1.84258800 | 0.01758100  |
| H | -7.00723200 | -2.63797300 | -0.05920700 |
| C | -5.64591600 | -2.69604500 | 2.36441700  |
| C | -6.75900400 | -3.73466100 | 2.15121900  |
| H | -6.56927600 | -4.35740200 | 1.27010200  |
| H | -6.81281400 | -4.40010500 | 3.01971000  |
| H | -7.74002600 | -3.26023300 | 2.03254000  |
| C | -5.95775100 | -1.91669000 | 3.65971900  |
| H | -6.04156200 | -2.60802200 | 4.50660900  |
| H | -5.17260400 | -1.19315100 | 3.89875700  |
| H | -6.90347600 | -1.37029100 | 3.56884600  |
| C | -4.30224000 | -3.44439100 | 2.52012100  |
| H | -4.07576500 | -4.02252100 | 1.61767700  |
| H | -3.46394500 | -2.76120300 | 2.68490000  |
| H | -4.34883300 | -4.13783100 | 3.36884400  |
| C | -6.95228300 | -1.18769100 | -2.34131800 |
| C | -6.68259600 | -2.59795200 | -2.90951700 |
| H | -5.62403500 | -2.71609400 | -3.16556700 |
| H | -6.94074100 | -3.38046100 | -2.18926700 |
| H | -7.27744400 | -2.76556900 | -3.81561600 |
| C | -6.62853300 | -0.15968400 | -3.43789300 |
| H | -6.81525700 | 0.86570600  | -3.09974400 |
| H | -5.58431900 | -0.22973900 | -3.76244500 |
| H | -7.26129700 | -0.34205400 | -4.31338600 |
| C | -8.44797300 | -1.05477100 | -1.98226400 |
| H | -9.07042500 | -1.21057000 | -2.87168900 |
| H | -8.74964400 | -1.78919800 | -1.22895300 |

|   |             |             |             |
|---|-------------|-------------|-------------|
| H | -8.66427600 | -0.05771200 | -1.58273100 |
| C | 6.51639000  | -1.91575800 | 0.25341000  |
| C | 6.95218200  | -0.47249700 | -0.05019600 |
| H | 6.97142500  | 0.14347200  | 0.85622100  |
| H | 7.96561100  | -0.47581100 | -0.46659000 |
| H | 6.28799100  | -0.00116600 | -0.78097800 |
| C | 7.49507200  | -2.52209800 | 1.28189300  |
| H | 7.46352400  | -1.96426200 | 2.22452200  |
| H | 7.25313300  | -3.56679300 | 1.50343700  |
| H | 8.52165900  | -2.48792800 | 0.89776900  |
| C | 6.58728000  | -2.72006500 | -1.06332800 |
| H | 6.31082400  | -3.76934600 | -0.91511400 |
| H | 5.91769300  | -2.28311700 | -1.81007000 |
| H | 7.60819700  | -2.69943500 | -1.46328000 |
| C | 2.55425100  | -4.73338800 | 1.82365100  |
| C | 1.77313100  | -4.74333800 | 3.15501200  |
| H | 2.42616900  | -4.48563800 | 3.99662800  |
| H | 0.93330300  | -4.04429600 | 3.13677100  |
| H | 1.36301100  | -5.74374400 | 3.33571000  |
| C | 1.56226900  | -4.99270300 | 0.66642300  |
| H | 1.08237800  | -5.97148800 | 0.78919400  |
| H | 0.77730000  | -4.23144100 | 0.64743900  |
| H | 2.08319600  | -4.99246000 | -0.29918700 |
| C | 3.58765900  | -5.87227200 | 1.85803100  |
| H | 4.34885500  | -5.70325600 | 2.62838900  |
| H | 3.08403800  | -6.81858000 | 2.08281100  |
| H | 4.09669200  | -5.99657000 | 0.89576400  |
| O | 0.47667700  | -0.42536100 | 0.32741300  |
| O | -1.80197200 | -0.18944900 | 1.42994300  |
| P | -0.86269200 | -1.29339300 | 0.70014700  |

|   |             |             |             |
|---|-------------|-------------|-------------|
| O | -0.68359200 | -2.45767600 | 1.59094200  |
| O | -1.45180600 | -1.57798300 | -0.73764100 |
| H | -0.90784200 | -1.27444400 | -1.53151800 |
| C | 0.48330700  | 0.30807200  | -2.66925000 |
| C | 1.85255300  | 0.57184900  | -2.49284900 |
| O | -0.00551100 | -0.84733800 | -2.81916700 |
| S | 2.87768500  | -0.79542200 | -2.64693500 |
| O | 4.30532300  | -0.46992400 | -2.42467200 |
| C | 2.38144400  | -2.19260000 | -1.62289000 |
| H | 3.13459300  | -2.96746600 | -1.77402500 |
| H | 2.38428400  | -1.84918300 | -0.59154800 |
| H | 1.38411700  | -2.50515400 | -1.92356900 |
| C | 2.66882500  | -1.47338000 | -4.31391100 |
| H | 3.06229000  | -0.71745400 | -4.99566700 |
| H | 3.24171000  | -2.40080100 | -4.38802900 |
| H | 1.60237800  | -1.64094200 | -4.47219600 |
| C | 2.47781000  | 1.88948400  | -2.24537200 |
| C | 3.21587600  | 2.12623300  | -1.07612900 |
| C | 2.30631600  | 2.94443300  | -3.15418200 |
| C | 3.76218000  | 3.38061400  | -0.81686500 |
| H | 3.33693700  | 1.32461700  | -0.36119600 |
| C | 2.83987500  | 4.20434700  | -2.88904900 |
| H | 1.73420000  | 2.77239100  | -4.06020600 |
| C | 3.57120900  | 4.42721300  | -1.72056700 |
| H | 4.31960500  | 3.54210100  | 0.10169600  |
| H | 2.68651100  | 5.01335300  | -3.59792400 |
| H | 3.98727900  | 5.40987500  | -1.51650100 |
| O | -0.31458800 | 1.39769000  | -2.68777900 |
| C | -1.69625700 | 1.14737600  | -2.99281700 |
| H | -2.14772400 | 2.13289400  | -3.08793200 |

|   |             |            |             |
|---|-------------|------------|-------------|
| H | -1.78616000 | 0.58598600 | -3.92606800 |
| H | -2.18135400 | 0.59640100 | -2.18654100 |

**R-int2**

|   |             |             |             |
|---|-------------|-------------|-------------|
| C | -1.64285700 | -0.56147700 | 1.95509600  |
| C | -2.49152400 | 0.53599200  | 1.72721200  |
| H | -0.27930000 | -1.97745300 | 1.07814700  |
| C | -0.94875200 | -1.14057300 | 0.89559000  |
| C | -2.64176900 | 1.05386100  | 0.42690200  |
| C | -2.03070200 | 0.35667500  | -0.63304700 |
| C | -1.15053500 | -0.71222700 | -0.42054600 |
| C | -3.36982500 | 2.32331000  | 0.13369400  |
| C | -3.00296500 | 3.54053200  | 0.75880900  |
| C | -4.36244400 | 2.32763700  | -0.85943200 |
| C | -1.81360100 | 3.60895700  | 1.70053200  |
| C | -3.72719900 | 4.70545900  | 0.45156900  |
| C | -5.01020100 | 3.50949900  | -1.26993800 |
| C | -1.28527500 | 5.03301900  | 1.89096300  |
| H | -1.02287100 | 2.94572500  | 1.33380800  |
| C | -3.43442400 | 6.04411400  | 1.11015600  |
| C | -4.70724100 | 4.66463200  | -0.54113200 |
| C | -2.44086500 | 5.95893200  | 2.27106000  |
| H | -0.50609200 | 5.03639100  | 2.66202000  |
| H | -3.02954000 | 6.73240200  | 0.35196600  |
| H | -5.24372100 | 5.58087800  | -0.77403900 |
| H | -2.94055200 | 5.55580600  | 3.16263400  |
| H | -4.37687900 | 6.49669300  | 1.44380900  |
| H | -2.08349500 | 6.96175900  | 2.53250200  |
| H | -0.81547400 | 5.39251700  | 0.96352600  |
| H | -2.09041600 | 3.22306400  | 2.68831100  |

|   |             |             |             |
|---|-------------|-------------|-------------|
| C | -3.29785500 | 0.99788100  | 2.91692400  |
| H | -2.64636300 | 1.46814300  | 3.66794200  |
| H | -4.03998200 | 1.74442100  | 2.62308400  |
| C | -3.98914000 | -0.22216000 | 3.56250500  |
| H | -4.72420900 | -0.60675800 | 2.84776000  |
| H | -4.54854900 | 0.10345300  | 4.44675700  |
| C | -2.98252300 | -1.34340500 | 3.93676900  |
| H | -3.34402600 | -2.30215500 | 3.55043200  |
| H | -2.91154600 | -1.45037700 | 5.02526000  |
| C | -1.56762200 | -1.08099400 | 3.36766200  |
| H | -0.96131400 | -1.99174400 | 3.41647000  |
| H | -1.06541800 | -0.33777100 | 4.00459200  |
| C | -0.42649600 | -1.33949600 | -1.55998900 |
| C | -1.12118000 | -1.98406600 | -2.58327500 |
| C | 0.97252900  | -1.23936700 | -1.62632000 |
| C | -0.44569500 | -2.51677300 | -3.69125100 |
| H | -2.20186800 | -2.04068900 | -2.51877000 |
| C | 1.67838700  | -1.75778000 | -2.71386000 |
| H | 1.48818300  | -0.72960200 | -0.82059900 |
| C | 0.94573200  | -2.38740600 | -3.73644500 |
| H | 1.48493600  | -2.79027700 | -4.58554600 |
| C | -5.86004500 | 3.58403300  | -2.48534200 |
| C | -5.84166200 | 4.75600100  | -3.24911100 |
| C | -6.61054000 | 2.49499800  | -2.95587900 |
| C | -6.53167600 | 4.86270700  | -4.46142600 |
| H | -5.24488300 | 5.59284200  | -2.90740000 |
| C | -7.24883900 | 2.53655000  | -4.19198800 |
| H | -6.64688100 | 1.59843100  | -2.36115800 |
| C | -7.20659600 | 3.73243700  | -4.92764700 |
| H | -7.70223900 | 3.76977700  | -5.89003700 |



|   |             |             |             |
|---|-------------|-------------|-------------|
| C | -7.90905200 | 1.28791100  | -4.79307600 |
| C | -7.95383000 | 0.11222600  | -3.80088900 |
| H | -8.45843300 | -0.74012200 | -4.26959100 |
| H | -6.95239700 | -0.21933400 | -3.50767300 |
| H | -8.51151300 | 0.37144500  | -2.89378100 |
| C | -7.06593100 | 0.84641000  | -6.01087600 |
| H | -7.49580900 | -0.05142200 | -6.47162700 |
| H | -7.02891500 | 1.63134000  | -6.77525900 |
| H | -6.04212400 | 0.61725100  | -5.69724300 |
| C | -9.35072300 | 1.60301300  | -5.24084300 |
| H | -9.96210600 | 1.92025300  | -4.38844100 |
| H | -9.38420100 | 2.39939300  | -5.99168100 |
| H | -9.81510600 | 0.71256600  | -5.68100900 |
| C | -6.53308300 | 6.20499900  | -5.20729500 |
| C | -5.09042900 | 6.72274600  | -5.38438000 |
| H | -4.48353100 | 6.00348500  | -5.93660200 |
| H | -5.09415400 | 7.66992200  | -5.93780700 |
| H | -4.59961100 | 6.90456500  | -4.42323400 |
| C | -7.33929600 | 7.22491600  | -4.37330600 |
| H | -8.37265300 | 6.88674800  | -4.23879500 |
| H | -6.90019600 | 7.35795900  | -3.37880500 |
| H | -7.35892500 | 8.20266700  | -4.87096900 |
| C | -7.17764900 | 6.09976300  | -6.59909300 |
| H | -8.22888100 | 5.79863400  | -6.53776000 |
| H | -7.14184300 | 7.07478100  | -7.09809000 |
| H | -6.64863300 | 5.37926100  | -7.23090000 |
| C | 3.20507300  | -1.64607800 | -2.84037400 |
| C | 3.84274000  | -0.94420900 | -1.63044500 |
| H | 3.64407900  | -1.48586100 | -0.69960200 |
| H | 4.92922100  | -0.89302700 | -1.76187900 |

|   |             |             |             |
|---|-------------|-------------|-------------|
| H | 3.47284600  | 0.08059300  | -1.51367400 |
| C | 3.81652800  | -3.05900800 | -2.95595600 |
| H | 3.57891400  | -3.65534600 | -2.06849400 |
| H | 3.43535000  | -3.59555300 | -3.83018700 |
| H | 4.90780200  | -2.99855900 | -3.04701100 |
| C | 3.55596900  | -0.83356500 | -4.10649800 |
| H | 3.14600900  | -1.29590800 | -5.01024100 |
| H | 3.15677500  | 0.18590500  | -4.03433000 |
| H | 4.64318100  | -0.76048400 | -4.22955100 |
| C | -1.25543400 | -3.21482400 | -4.79200900 |
| C | -0.36983000 | -3.68689800 | -5.95601000 |
| H | 0.38285900  | -4.41542700 | -5.63215400 |
| H | -0.99200100 | -4.16970300 | -6.71713300 |
| H | 0.14665000  | -2.84731900 | -6.43622100 |
| C | -1.96149300 | -4.44483400 | -4.18059300 |
| H | -2.64515500 | -4.15059400 | -3.37899500 |
| H | -2.54716900 | -4.96450500 | -4.94837500 |
| H | -1.23260900 | -5.15198000 | -3.76734100 |
| C | -2.32103200 | -2.24378800 | -5.34754900 |
| H | -3.02029500 | -1.91575600 | -4.57407900 |
| H | -1.85561800 | -1.35415300 | -5.78361700 |
| H | -2.89939800 | -2.74222800 | -6.13549300 |
| O | -2.27866200 | 0.76787500  | -1.93171600 |
| O | -4.71452000 | 1.11871800  | -1.41757500 |
| P | -3.79391100 | 0.40311300  | -2.59666800 |
| O | -4.11410700 | -1.04877900 | -2.56312800 |
| O | -3.78798200 | 1.20269700  | -3.87503200 |
| H | -2.68695300 | 2.42612200  | -4.22853300 |
| C | -1.39114200 | 4.09383700  | -3.78543600 |
| C | -1.97924700 | 3.11230000  | -4.77057100 |

|   |             |            |             |
|---|-------------|------------|-------------|
| O | -0.22475500 | 4.12321500 | -3.42764400 |
| S | -0.70079200 | 1.90539800 | -5.34343200 |
| O | -1.25833300 | 0.97838400 | -6.34289000 |
| C | 0.66795100  | 2.83529400 | -6.05644200 |
| H | 0.27276300  | 3.34233900 | -6.93810400 |
| H | 1.03771400  | 3.53915900 | -5.31110600 |
| H | 1.42385800  | 2.10086400 | -6.34315600 |
| C | -0.01836700 | 1.08074600 | -3.91388300 |
| H | 0.57528000  | 0.24200800 | -4.28367300 |
| H | 0.57074000  | 1.80609800 | -3.35359500 |
| H | -0.85837600 | 0.72270900 | -3.31130300 |
| C | -2.66875500 | 3.67494800 | -5.98140100 |
| C | -2.12009900 | 4.74301200 | -6.70582100 |
| C | -3.85006600 | 3.06382600 | -6.41574800 |
| C | -2.74077400 | 5.18653700 | -7.87103900 |
| H | -1.22165200 | 5.24076100 | -6.34746900 |
| C | -4.46798400 | 3.51594400 | -7.58085600 |
| H | -4.26919400 | 2.25243300 | -5.83144600 |
| C | -3.91234900 | 4.56566000 | -8.31307300 |
| H | -2.31974100 | 6.01904300 | -8.42675000 |
| H | -5.38599700 | 3.04235100 | -7.91360800 |
| H | -4.39774200 | 4.91223300 | -9.22077700 |
| O | -2.34264200 | 4.90312600 | -3.33886800 |
| C | -1.94697800 | 5.84009200 | -2.31532500 |
| H | -1.12637100 | 6.46466400 | -2.67475500 |
| H | -2.83752700 | 6.43178300 | -2.11619100 |
| H | -1.64645400 | 5.29701400 | -1.41853500 |

### S-int2

|   |            |             |            |
|---|------------|-------------|------------|
| C | 0.78894900 | -2.68086100 | 3.68169900 |
|---|------------|-------------|------------|

|   |             |             |            |
|---|-------------|-------------|------------|
| C | -0.12588700 | -1.62381500 | 3.54016900 |
| H | 2.34100100  | -3.83186700 | 2.73344900 |
| C | 1.62613900  | -3.02130400 | 2.61142400 |
| C | -0.15772700 | -0.89583000 | 2.32565800 |
| C | 0.59831500  | -1.35958000 | 1.24369800 |
| C | 1.52531200  | -2.40445400 | 1.36574000 |
| C | -0.97003000 | 0.35044000  | 2.17360500 |
| C | -0.77969200 | 1.46645400  | 3.01571400 |
| C | -1.93673100 | 0.43222000  | 1.15057400 |
| C | 0.35434800  | 1.60973800  | 4.00688200 |
| C | -1.61140100 | 2.59129700  | 2.87360300 |
| C | -2.82311900 | 1.51934200  | 1.04151200 |
| C | -0.06298500 | 2.23360600  | 5.36388900 |
| H | 1.09199500  | 2.27237300  | 3.53772800 |
| C | -1.37356600 | 3.75985100  | 3.79814500 |
| C | -2.63738500 | 2.58528700  | 1.93368400 |
| C | -1.22393000 | 3.24666000  | 5.24023200 |
| H | -0.34753400 | 1.44442200  | 6.06812100 |
| H | -0.45699000 | 4.29737700  | 3.50904900 |
| H | -3.29748200 | 3.44554000  | 1.85791400 |
| H | -2.16730100 | 2.76381500  | 5.52091400 |
| H | -2.19685800 | 4.47892400  | 3.72410600 |
| H | -1.07780200 | 4.08359700  | 5.93225800 |
| H | 0.81920200  | 2.72175000  | 5.79386700 |
| H | 0.86676000  | 0.66042700  | 4.16883400 |
| C | -1.11394700 | -1.29782000 | 4.64727100 |
| H | -0.79266500 | -0.40272000 | 5.19122700 |
| H | -2.07947100 | -1.03984500 | 4.19877800 |
| C | -1.27296100 | -2.43611600 | 5.65860800 |
| H | -1.80674000 | -3.27746900 | 5.19608200 |

|   |             |             |             |
|---|-------------|-------------|-------------|
| H | -1.88354900 | -2.09452700 | 6.50249100  |
| C | 0.10436600  | -2.90607300 | 6.12856900  |
| H | 0.02068500  | -3.64044100 | 6.93795700  |
| H | 0.65942600  | -2.04713000 | 6.53226700  |
| C | 0.86711200  | -3.51372200 | 4.94942900  |
| H | 0.45435100  | -4.51098800 | 4.73731300  |
| H | 1.92016300  | -3.67710900 | 5.21286700  |
| C | 2.39790700  | -2.78706800 | 0.22561800  |
| C | 1.85085300  | -3.21138500 | -0.98955500 |
| C | 3.78560500  | -2.69619900 | 0.35875400  |
| C | 2.67478600  | -3.56489400 | -2.06398100 |
| H | 0.77293900  | -3.24784300 | -1.09268900 |
| C | 4.63909100  | -2.99800500 | -0.70676800 |
| H | 4.19328000  | -2.35171400 | 1.30388100  |
| C | 4.06246100  | -3.44939800 | -1.90024300 |
| H | 4.70964700  | -3.70481200 | -2.72740700 |
| C | -3.96225000 | 1.55634200  | 0.08604300  |
| C | -3.81870700 | 1.22348900  | -1.26979100 |
| C | -5.21689800 | 1.95469400  | 0.55587000  |
| C | -4.90702900 | 1.26721300  | -2.13868400 |
| H | -2.84343100 | 0.94206100  | -1.63449400 |
| C | -6.33063800 | 2.02569800  | -0.29256600 |
| H | -5.32607600 | 2.18709200  | 1.61073900  |
| C | -6.15188600 | 1.67539400  | -1.63165600 |
| H | -6.99911700 | 1.71107800  | -2.30549100 |
| C | -7.68704600 | 2.46440400  | 0.27794300  |
| C | -7.55497000 | 3.88203100  | 0.87557500  |
| H | -7.25188000 | 4.60070100  | 0.10587700  |
| H | -8.51311700 | 4.21238400  | 1.29475900  |
| H | -6.80962500 | 3.91492000  | 1.67665100  |

|   |             |             |             |
|---|-------------|-------------|-------------|
| C | -8.11805400 | 1.47910900  | 1.38585200  |
| H | -9.08489400 | 1.77772600  | 1.80911100  |
| H | -8.21732600 | 0.46470500  | 0.98449000  |
| H | -7.38989800 | 1.44482000  | 2.20228300  |
| C | -8.79052000 | 2.49648300  | -0.79198400 |
| H | -8.55065900 | 3.19591100  | -1.60051700 |
| H | -8.95628400 | 1.50731500  | -1.23247400 |
| H | -9.73397600 | 2.82112900  | -0.33938600 |
| C | -4.78067400 | 0.87623600  | -3.61797900 |
| C | -5.74012900 | -0.29664000 | -3.91564500 |
| H | -5.66475300 | -0.59187800 | -4.96919900 |
| H | -5.48854400 | -1.16522500 | -3.29799600 |
| H | -6.78344200 | -0.03098300 | -3.71576100 |
| C | -3.35501000 | 0.43048100  | -3.98495200 |
| H | -2.62261800 | 1.22612100  | -3.81425000 |
| H | -3.03178000 | -0.44114900 | -3.40787300 |
| H | -3.31937700 | 0.16300600  | -5.04731900 |
| C | -5.15791500 | 2.08496000  | -4.50108200 |
| H | -5.08335500 | 1.82137000  | -5.56310400 |
| H | -6.18147200 | 2.42454500  | -4.31074800 |
| H | -4.48496200 | 2.92909000  | -4.31066200 |
| C | 6.15159600  | -2.79548200 | -0.54039800 |
| C | 6.92873000  | -3.09221400 | -1.83326400 |
| H | 6.60936700  | -2.43763800 | -2.65153100 |
| H | 7.99856100  | -2.92292600 | -1.66812200 |
| H | 6.80312600  | -4.13174800 | -2.15494600 |
| C | 6.42595200  | -1.32623800 | -0.14782100 |
| H | 7.50420200  | -1.15563600 | -0.03992600 |
| H | 6.04056600  | -0.63990600 | -0.90759600 |
| H | 5.95088000  | -1.06787400 | 0.80360900  |

|   |             |             |             |
|---|-------------|-------------|-------------|
| C | 6.67592100  | -3.73094100 | 0.56941100  |
| H | 6.17726000  | -3.53867000 | 1.52506500  |
| H | 6.50121300  | -4.78028400 | 0.30722000  |
| H | 7.75356100  | -3.58863600 | 0.71671200  |
| C | 2.03353900  | -4.03929400 | -3.37737400 |
| C | 1.07368500  | -5.21289900 | -3.08330000 |
| H | 1.60526800  | -6.04318200 | -2.60430300 |
| H | 0.25489700  | -4.90439400 | -2.42778300 |
| H | 0.63210300  | -5.58136100 | -4.01697500 |
| C | 1.22300800  | -2.88126400 | -4.00224800 |
| H | 1.87664200  | -2.03779800 | -4.25628300 |
| H | 0.74291000  | -3.21757600 | -4.92973400 |
| H | 0.44093900  | -2.52600500 | -3.32513100 |
| C | 3.07885400  | -4.51631000 | -4.39887700 |
| H | 3.75566000  | -3.70878100 | -4.70313900 |
| H | 3.68664200  | -5.33968300 | -4.00642200 |
| H | 2.57268200  | -4.87398900 | -5.30203000 |
| O | 0.50488900  | -0.70236700 | 0.03770900  |
| O | -2.03620200 | -0.61722400 | 0.25773100  |
| P | -0.87430900 | -0.77043700 | -0.91913900 |
| O | -1.06956500 | -2.09132300 | -1.57082300 |
| O | -0.72126500 | 0.52038100  | -1.69797900 |
| H | 1.34527000  | 0.81787500  | -0.89512900 |
| C | 2.50829500  | 1.65738000  | 0.65638400  |
| C | 2.15415200  | 1.55540200  | -0.82107300 |
| O | 2.11799100  | 2.53838500  | 1.39581000  |
| S | 1.31785800  | 3.10405200  | -1.35308500 |
| O | 2.15296500  | 4.32223800  | -1.30110000 |
| C | 0.79801200  | 2.69855900  | -3.02314600 |
| H | 0.17579500  | 1.79773400  | -2.95167900 |

|   |             |             |             |
|---|-------------|-------------|-------------|
| H | 0.24181900  | 3.56301500  | -3.39223600 |
| H | 1.70398800  | 2.53747500  | -3.60883500 |
| C | -0.21667800 | 3.21422400  | -0.42780700 |
| H | -0.74715700 | 4.08825500  | -0.81205300 |
| H | -0.75433700 | 2.28099800  | -0.63012300 |
| H | 0.04240300  | 3.32494000  | 0.62326600  |
| C | 3.27846800  | 1.20010200  | -1.75395700 |
| C | 3.20157000  | -0.00713300 | -2.45485500 |
| C | 4.39062000  | 2.03904700  | -1.91059000 |
| C | 4.23069200  | -0.36793400 | -3.32308300 |
| H | 2.35767200  | -0.67022700 | -2.29927700 |
| C | 5.41213100  | 1.67412900  | -2.78489000 |
| H | 4.44741400  | 2.97331800  | -1.36069300 |
| C | 5.33079400  | 0.47282000  | -3.49444400 |
| H | 4.17198300  | -1.31176600 | -3.85288700 |
| H | 6.27247400  | 2.32479700  | -2.90940500 |
| H | 6.13054800  | 0.18902900  | -4.17244100 |
| O | 3.25442200  | 0.61639800  | 1.00224200  |
| C | 3.52962000  | 0.44008400  | 2.40824800  |
| H | 3.68402100  | 1.40656100  | 2.88907400  |
| H | 2.68991900  | -0.08747400 | 2.86340600  |
| H | 4.42977400  | -0.17072500 | 2.45099600  |

### **R-int3**

|   |             |             |            |
|---|-------------|-------------|------------|
| C | -0.50054700 | -3.48822800 | 3.77567000 |
| C | -1.35308600 | -2.40062100 | 3.51729200 |
| H | 1.33937000  | -4.45756800 | 3.31245700 |
| C | 0.68602900  | -3.62562500 | 3.06921900 |
| C | -0.97510300 | -1.43348300 | 2.57318900 |
| C | 0.20212200  | -1.63993200 | 1.82383900 |



|   |             |             |            |
|---|-------------|-------------|------------|
| C | 1.05949500  | -2.73734900 | 2.04367100 |
| C | -1.81550100 | -0.23026400 | 2.29957000 |
| C | -2.12383900 | 0.72691900  | 3.29388200 |
| C | -2.28753700 | -0.02926500 | 0.99857300 |
| C | -1.51657300 | 0.61150200  | 4.68084200 |
| C | -2.95430400 | 1.81330300  | 2.96468800 |
| C | -3.14034700 | 1.02366000  | 0.65869400 |
| C | -1.51730300 | 1.93754700  | 5.44597600 |
| H | -0.50021600 | 0.21180000  | 4.59954100 |
| C | -3.28490500 | 2.90737800  | 3.96578400 |
| C | -3.46429900 | 1.92997100  | 1.66645600 |
| C | -2.91590800 | 2.55460500  | 5.40841300 |
| H | -1.18871700 | 1.76687200  | 6.47785500 |
| H | -2.74146400 | 3.81864000  | 3.67479000 |
| H | -4.12101600 | 2.76297900  | 1.42621300 |
| H | -3.63833900 | 1.83215700  | 5.81392300 |
| H | -4.35049000 | 3.15903800  | 3.89176000 |
| H | -2.97336300 | 3.45015400  | 6.03797500 |
| H | -0.79856100 | 2.63274200  | 4.99087400 |
| H | -2.08017700 | -0.12212600 | 5.27199800 |
| C | -2.69410700 | -2.43655600 | 4.20799100 |
| H | -2.57888300 | -2.25313700 | 5.28611500 |
| H | -3.35610900 | -1.65772400 | 3.82206400 |
| C | -3.32600800 | -3.83009700 | 4.00347600 |
| H | -3.53110700 | -3.94890100 | 2.93355300 |
| H | -4.29256000 | -3.87343100 | 4.51788200 |
| C | -2.40039000 | -4.97965200 | 4.48441800 |
| H | -2.34820900 | -5.75297100 | 3.70999100 |
| H | -2.81494800 | -5.45959900 | 5.37808900 |
| C | -0.96633100 | -4.49031800 | 4.80015200 |

|   |             |             |             |
|---|-------------|-------------|-------------|
| H | -0.27678900 | -5.33924100 | 4.85927300  |
| H | -0.96748400 | -4.02075400 | 5.79436500  |
| C | 2.25092600  | -3.03218900 | 1.20132300  |
| C | 2.68573700  | -4.36316900 | 1.06144500  |
| C | 2.93495600  | -2.03834600 | 0.48692200  |
| C | 3.73330100  | -4.71463200 | 0.20818600  |
| H | 2.15706000  | -5.14183300 | 1.59465700  |
| C | 3.98113400  | -2.35079500 | -0.38516600 |
| H | 2.62372800  | -1.01443400 | 0.60311400  |
| C | 4.36287500  | -3.69091000 | -0.51204400 |
| H | 5.17322400  | -3.94632300 | -1.18659000 |
| C | -3.65698400 | 1.16054700  | -0.72855600 |
| C | -3.26916100 | 2.24661700  | -1.51696400 |
| C | -4.53140400 | 0.20065100  | -1.25080800 |
| C | -3.75176400 | 2.39742800  | -2.82120900 |
| H | -2.55847600 | 2.94928100  | -1.10150400 |
| C | -5.04705000 | 0.32359200  | -2.54425900 |
| H | -4.80556900 | -0.63973100 | -0.62465200 |
| C | -4.64556700 | 1.43226700  | -3.30267700 |
| H | -5.02403000 | 1.53524300  | -4.31463000 |
| C | -6.00403200 | -0.71054100 | -3.15716000 |
| C | -7.28273000 | -0.00221200 | -3.65274900 |
| H | -7.97840800 | -0.73198600 | -4.08411300 |
| H | -7.78992400 | 0.50655600  | -2.82553200 |
| H | -7.06524300 | 0.74523400  | -4.42192300 |
| C | -6.41759800 | -1.79430800 | -2.14829300 |
| H | -7.11844300 | -2.49023500 | -2.62295300 |
| H | -5.55927700 | -2.37748300 | -1.80248900 |
| H | -6.91693300 | -1.36188500 | -1.27393000 |
| C | -5.30564700 | -1.40573700 | -4.34699800 |

|   |             |             |             |
|---|-------------|-------------|-------------|
| H | -4.98602700 | -0.68287900 | -5.10504500 |
| H | -4.42260400 | -1.95946800 | -4.01371200 |
| H | -5.99085900 | -2.11717800 | -4.82556800 |
| C | -3.32395800 | 3.55838000  | -3.73022200 |
| C | -2.32543300 | 4.49895100  | -3.03585200 |
| H | -1.41102300 | 3.97117100  | -2.74494100 |
| H | -2.04303800 | 5.30573000  | -3.72111300 |
| H | -2.75657100 | 4.95920800  | -2.13979700 |
| C | -4.57034300 | 4.37746100  | -4.12874000 |
| H | -5.30132800 | 3.76622800  | -4.66810000 |
| H | -5.06632300 | 4.78819800  | -3.24207600 |
| H | -4.28569100 | 5.21252500  | -4.78003200 |
| C | -2.64739400 | 2.99644500  | -4.99959400 |
| H | -3.31462700 | 2.33191500  | -5.55767900 |
| H | -2.35608200 | 3.81668800  | -5.66670800 |
| H | -1.74980900 | 2.42494700  | -4.74422300 |
| C | 4.71286800  | -1.26342900 | -1.18437300 |
| C | 3.98943700  | 0.09371800  | -1.11253300 |
| H | 3.98822800  | 0.50231100  | -0.09673600 |
| H | 4.50484700  | 0.81723500  | -1.75394600 |
| H | 2.94792700  | 0.02612800  | -1.44502200 |
| C | 6.13672500  | -1.09978000 | -0.61040100 |
| H | 6.09906300  | -0.79782000 | 0.44204900  |
| H | 6.70047300  | -2.03730200 | -0.67090200 |
| H | 6.68988800  | -0.33374500 | -1.16719800 |
| C | 4.80591500  | -1.67815000 | -2.66745900 |
| H | 5.39567800  | -2.58991100 | -2.80705000 |
| H | 3.81157100  | -1.84808800 | -3.08904000 |
| H | 5.28888100  | -0.88477200 | -3.25020200 |
| C | 4.18297400  | -6.17048100 | 0.00829900  |

|   |             |             |             |
|---|-------------|-------------|-------------|
| C | 3.95344300  | -6.58151400 | -1.46351600 |
| H | 4.48056300  | -5.91632200 | -2.15509200 |
| H | 4.31646000  | -7.60112500 | -1.63850800 |
| H | 2.88734500  | -6.56489100 | -1.72169600 |
| C | 5.68506700  | -6.29228700 | 0.34404300  |
| H | 5.87393400  | -6.00143700 | 1.38311000  |
| H | 6.02412500  | -7.32623900 | 0.20943000  |
| H | 6.29805300  | -5.65289800 | -0.29848500 |
| C | 3.41253600  | -7.15384900 | 0.90500600  |
| H | 3.54025400  | -6.91807400 | 1.96708800  |
| H | 2.33942500  | -7.15915600 | 0.68182500  |
| H | 3.78449500  | -8.17086000 | 0.74099600  |
| O | 0.50189200  | -0.70631200 | 0.85044000  |
| O | -1.87562100 | -0.89827400 | 0.00423100  |
| P | -0.32990800 | -0.70255100 | -0.58514200 |
| O | -0.09225400 | -1.97041300 | -1.36488200 |
| O | -0.10543800 | 0.64731300  | -1.19043000 |
| H | -1.34191400 | -2.99805200 | -2.90861800 |
| C | -1.59451300 | -4.06103500 | -3.01928700 |
| S | 0.01145100  | -4.91472500 | -2.59835700 |
| O | 0.08642300  | -6.31981600 | -3.05482100 |
| C | 1.32522200  | -3.85633500 | -3.21121100 |
| H | 1.23022300  | -3.81568600 | -4.29781600 |
| H | 1.17275400  | -2.87923400 | -2.74200600 |
| H | 2.26434400  | -4.31509100 | -2.89380700 |
| C | 0.09832900  | -4.82298700 | -0.81814400 |
| H | 1.09134400  | -5.18188500 | -0.55005300 |
| H | -0.03096700 | -3.77379700 | -0.53733900 |
| H | -0.68535200 | -5.47342200 | -0.42999200 |
| C | -0.28788700 | -1.45129500 | -5.56943800 |

|   |             |             |             |
|---|-------------|-------------|-------------|
| C | 0.40358500  | -0.63570700 | -4.62308100 |
| C | 1.80009500  | -0.57273200 | -4.57472900 |
| C | 2.51223500  | -1.33552300 | -5.49435600 |
| C | 1.84918100  | -2.14577600 | -6.44104000 |
| C | 0.46127100  | -2.20700000 | -6.48824100 |
| C | -1.68903500 | -1.29324100 | -5.28960700 |
| C | -1.78934500 | -0.42757600 | -4.22274500 |
| H | 2.30408300  | 0.05126200  | -3.84334600 |
| H | 3.59771400  | -1.30495200 | -5.48599200 |
| H | 2.43636300  | -2.72799800 | -7.14595100 |
| H | -0.03740300 | -2.84724800 | -7.20951400 |
| H | -2.51770200 | -1.72423400 | -5.83179700 |
| H | -2.66101700 | -0.06174500 | -3.70313200 |
| N | -0.53798600 | -0.00370300 | -3.84370300 |
| H | -0.34060600 | 0.44239100  | -2.93676400 |
| C | -1.87221800 | -4.36765800 | -4.48690500 |
| O | -1.01849700 | -4.66679300 | -5.29096400 |
| O | -3.17554300 | -4.25020400 | -4.75502100 |
| C | -3.54468200 | -4.46055600 | -6.13127500 |
| H | -4.61928700 | -4.28844900 | -6.16726200 |
| H | -3.01593400 | -3.75504100 | -6.77537100 |
| H | -3.29886000 | -5.48119700 | -6.43311900 |
| C | -2.64446800 | -4.47047800 | -2.02576800 |
| C | -3.16422300 | -5.77260800 | -2.01616000 |
| C | -3.04358000 | -3.55085200 | -1.05253000 |
| C | -4.07734700 | -6.14672700 | -1.03284600 |
| H | -2.84570900 | -6.48980300 | -2.76722500 |
| C | -3.96104300 | -3.93002100 | -0.07275300 |
| H | -2.62376800 | -2.55393600 | -1.04056000 |
| C | -4.47681500 | -5.22620600 | -0.05881600 |

|   |             |             |             |
|---|-------------|-------------|-------------|
| H | -4.47786800 | -7.15609400 | -1.02582100 |
| H | -4.26028800 | -3.20770900 | 0.68090600  |
| H | -5.18746800 | -5.52199000 | 0.70762600  |

**S-int3**

|   |             |             |            |
|---|-------------|-------------|------------|
| C | 0.73633500  | -1.75656500 | 4.57832800 |
| C | -0.21695800 | -0.74072600 | 4.38240800 |
| H | 2.64572300  | -2.54150900 | 4.04687500 |
| C | 1.92036000  | -1.75834800 | 3.84964000 |
| C | 0.05785200  | 0.29333700  | 3.47041900 |
| C | 1.24256200  | 0.22732100  | 2.70970000 |
| C | 2.19987400  | -0.79695700 | 2.86049600 |
| C | -0.88428600 | 1.42974500  | 3.24193700 |
| C | -1.26951100 | 2.29519200  | 4.29334700 |
| C | -1.37567300 | 1.66614800  | 1.94802500 |
| C | -0.60287600 | 2.19305600  | 5.65491800 |
| C | -2.22907600 | 3.29190800  | 4.04668100 |
| C | -2.32923300 | 2.65545100  | 1.68734700 |
| C | -0.72740900 | 3.47966500  | 6.47537400 |
| H | 0.44898700  | 1.91827400  | 5.52302200 |
| C | -2.66694100 | 4.27962900  | 5.11492500 |
| C | -2.76105500 | 3.43183000  | 2.76133100 |
| C | -2.19175800 | 3.91717200  | 6.52371000 |
| H | -0.33197200 | 3.31153300  | 7.48386300 |
| H | -2.26983500 | 5.27100600  | 4.85172100 |
| H | -3.50127400 | 4.20629400  | 2.57431000 |
| H | -2.79899700 | 3.09326600  | 6.92463300 |
| H | -3.75957100 | 4.38056100  | 5.09084500 |
| H | -2.33131100 | 4.77163400  | 7.19586200 |
| H | -0.12142900 | 4.27527800  | 6.02083700 |

|   |             |             |             |
|---|-------------|-------------|-------------|
| H | -1.05547500 | 1.38036000  | 6.23625700  |
| C | -1.51265100 | -0.89897900 | 5.13976100  |
| H | -1.33714800 | -0.71652500 | 6.20941900  |
| H | -2.25263800 | -0.16461000 | 4.81348000  |
| C | -2.07647500 | -2.32913300 | 4.98174100  |
| H | -2.50439600 | -2.42426300 | 3.97731600  |
| H | -2.91076200 | -2.45581500 | 5.68004100  |
| C | -1.00739400 | -3.43429800 | 5.20706300  |
| H | -0.90499200 | -4.04236400 | 4.29969400  |
| H | -1.32314900 | -4.11971700 | 6.00095100  |
| C | 0.37830200  | -2.84829200 | 5.55411400  |
| H | 1.13786900  | -3.63742300 | 5.55361000  |
| H | 0.34818100  | -2.44270300 | 6.57572000  |
| C | 3.36776800  | -0.96519400 | 1.95110100  |
| C | 3.90187900  | -2.25007200 | 1.74403300  |
| C | 3.89406800  | 0.09374900  | 1.19618500  |
| C | 4.88436600  | -2.49816900 | 0.78446800  |
| H | 3.50689800  | -3.08099100 | 2.31174500  |
| C | 4.84509300  | -0.12190400 | 0.19742200  |
| H | 3.51932700  | 1.08797500  | 1.36497700  |
| C | 5.32883600  | -1.42053400 | 0.01015900  |
| H | 6.06025300  | -1.60159200 | -0.77083300 |
| C | -2.84977000 | 2.91164100  | 0.31378000  |
| C | -2.08734900 | 3.66018800  | -0.58804600 |
| C | -4.12004200 | 2.45881900  | -0.05683400 |
| C | -2.58486200 | 3.98268700  | -1.85587000 |
| H | -1.09546600 | 3.96850700  | -0.28627900 |
| C | -4.64425500 | 2.75004000  | -1.32173600 |
| H | -4.68760000 | 1.87637100  | 0.65959300  |
| C | -3.86431100 | 3.52332600  | -2.19068500 |

|   |             |            |             |
|---|-------------|------------|-------------|
| H | -4.26173600 | 3.76470600 | -3.17091000 |
| C | -6.01853500 | 2.24628600 | -1.78621800 |
| C | -6.92195700 | 3.45258700 | -2.12032900 |
| H | -7.90800900 | 3.11169700 | -2.45835200 |
| H | -7.06190700 | 4.08755800 | -1.23859000 |
| H | -6.49088600 | 4.07184700 | -2.91295700 |
| C | -6.72289700 | 1.39935500 | -0.71391500 |
| H | -7.69145800 | 1.05379300 | -1.09163000 |
| H | -6.13331200 | 0.51427500 | -0.44729200 |
| H | -6.90700100 | 1.97282800 | 0.20097000  |
| C | -5.84296700 | 1.37294000 | -3.04797900 |
| H | -5.35557800 | 1.92091800 | -3.85941000 |
| H | -5.22586800 | 0.49456400 | -2.82873700 |
| H | -6.81711800 | 1.02358700 | -3.41099100 |
| C | -1.79412500 | 4.84341800 | -2.85254300 |
| C | -0.36314000 | 5.12569400 | -2.36227500 |
| H | 0.19358100  | 4.20582600 | -2.15998800 |
| H | 0.17924600  | 5.69210100 | -3.12737500 |
| H | -0.36129900 | 5.72535900 | -1.44530300 |
| C | -2.53199800 | 6.19048400 | -3.01913200 |
| H | -3.54530700 | 6.04703000 | -3.40998900 |
| H | -2.61305600 | 6.71201200 | -2.05877400 |
| H | -1.98903900 | 6.83924400 | -3.71702600 |
| C | -1.70481000 | 4.14283000 | -4.22572900 |
| H | -2.69361600 | 3.92883100 | -4.64367200 |
| H | -1.17872200 | 4.79014400 | -4.93721900 |
| H | -1.15921700 | 3.19925100 | -4.15357900 |
| C | 5.30490500  | 1.00530700 | -0.73733600 |
| C | 4.64511600  | 2.35377400 | -0.40022300 |
| H | 4.90031200  | 2.68572300 | 0.61252600  |



|   |             |             |             |
|---|-------------|-------------|-------------|
| H | 5.00563900  | 3.11825600  | -1.09755700 |
| H | 3.55386400  | 2.31528700  | -0.48367900 |
| C | 6.83618900  | 1.16857600  | -0.64750100 |
| H | 7.13848200  | 1.44440500  | 0.36900100  |
| H | 7.36110500  | 0.24502400  | -0.91415700 |
| H | 7.17639500  | 1.95614200  | -1.33028100 |
| C | 4.90515300  | 0.62683400  | -2.18145100 |
| H | 5.39814200  | -0.29461800 | -2.51070700 |
| H | 3.82382200  | 0.47735800  | -2.25476000 |
| H | 5.18915300  | 1.42509600  | -2.87795400 |
| C | 5.44813400  | -3.90283200 | 0.52407100  |
| C | 5.14412900  | -4.31413800 | -0.93263200 |
| H | 5.59026100  | -3.61997000 | -1.65120400 |
| H | 5.54229500  | -5.31485400 | -1.13950400 |
| H | 4.06620000  | -4.32915700 | -1.12398500 |
| C | 6.97600200  | -3.88627100 | 0.74510700  |
| H | 7.21602700  | -3.60399600 | 1.77611200  |
| H | 7.40218600  | -4.87811000 | 0.55214600  |
| H | 7.47148700  | -3.17241900 | 0.07986500  |
| C | 4.84156300  | -4.96393000 | 1.45705100  |
| H | 5.02920700  | -4.73279800 | 2.51140200  |
| H | 3.75912900  | -5.06218100 | 1.31465400  |
| H | 5.28932200  | -5.94079400 | 1.24525800  |
| O | 1.41490800  | 1.21728900  | 1.75928300  |
| O | -0.94670200 | 0.86882600  | 0.90036800  |
| P | 0.62288500  | 1.01306100  | 0.31794800  |
| O | 0.89472000  | -0.35335500 | -0.25154800 |
| O | 0.79987500  | 2.27186200  | -0.46864700 |
| H | -0.42250800 | -1.40859500 | -1.47257800 |
| C | -0.56959800 | -2.47128400 | -1.70023200 |

|   |             |             |             |
|---|-------------|-------------|-------------|
| S | -0.49755500 | -3.26383100 | -0.00566800 |
| O | -1.04955200 | -4.63874800 | -0.00160900 |
| C | 1.22650300  | -3.20551600 | 0.46123100  |
| H | 1.76807300  | -3.87982400 | -0.20057900 |
| H | 1.54893800  | -2.16646700 | 0.35036500  |
| H | 1.26955500  | -3.53596800 | 1.49996200  |
| C | -1.31194800 | -2.20615400 | 1.19454900  |
| H | -0.94162200 | -2.50667000 | 2.17664800  |
| H | -1.06198100 | -1.16384300 | 0.98512000  |
| H | -2.37936200 | -2.39210900 | 1.08946100  |
| C | -0.61651700 | -0.09597100 | -4.41862600 |
| C | 0.08861500  | 0.78830600  | -3.55099900 |
| C | 1.44152000  | 1.09791900  | -3.72360400 |
| C | 2.09932500  | 0.49668000  | -4.78966300 |
| C | 1.42727700  | -0.39282400 | -5.65640800 |
| C | 0.08293800  | -0.69333300 | -5.48214100 |
| C | -1.96862900 | -0.15379100 | -3.92870600 |
| C | -2.03151700 | 0.65758300  | -2.81743400 |
| H | 1.94271600  | 1.77158400  | -3.03669800 |
| H | 3.15191700  | 0.70980900  | -4.95480000 |
| H | 1.97731000  | -0.85419200 | -6.47191600 |
| H | -0.42087900 | -1.38568500 | -6.15105300 |
| H | -2.78401800 | -0.71841200 | -4.35805500 |
| H | -2.85313900 | 0.88707700  | -2.15723900 |
| N | -0.80011900 | 1.22732500  | -2.59641300 |
| H | -0.53203500 | 1.82833600  | -1.82042000 |
| C | -1.98221500 | -2.72056800 | -2.22747600 |
| O | -2.26530100 | -3.30662400 | -3.24032200 |
| O | -2.87753700 | -2.19483000 | -1.36738700 |
| C | -4.25595700 | -2.30424600 | -1.76587800 |

|   |             |             |             |
|---|-------------|-------------|-------------|
| H | -4.82675200 | -1.82505400 | -0.97096800 |
| H | -4.40786900 | -1.78394800 | -2.71345200 |
| H | -4.53719200 | -3.35405400 | -1.87450700 |
| C | 0.56662400  | -3.01852800 | -2.50966300 |
| C | 1.70721800  | -2.22146600 | -2.66646400 |
| C | 0.53779900  | -4.31851700 | -3.03444000 |
| C | 2.80531400  | -2.71402100 | -3.36621500 |
| H | 1.72493600  | -1.22782500 | -2.23604300 |
| C | 1.64469800  | -4.80612800 | -3.72580300 |
| H | -0.34456700 | -4.93420400 | -2.90875200 |
| C | 2.77708800  | -4.00500300 | -3.89464100 |
| H | 3.67789500  | -2.08250100 | -3.49594400 |
| H | 1.62154800  | -5.81121500 | -4.13647700 |
| H | 3.63615800  | -4.38954900 | -4.43734600 |

**R-int4**

|   |             |             |            |
|---|-------------|-------------|------------|
| C | -0.16020500 | -3.38714600 | 3.99721400 |
| C | -1.11627900 | -2.40156000 | 3.69807500 |
| H | 1.74725100  | -4.21533200 | 3.55023200 |
| C | 1.02842100  | -3.44823500 | 3.28384900 |
| C | -0.83028800 | -1.44426100 | 2.71227600 |
| C | 0.35979800  | -1.57716200 | 1.96905100 |
| C | 1.30994100  | -2.58969000 | 2.20475100 |
| C | -1.77236200 | -0.32802300 | 2.40053100 |
| C | -2.16663800 | 0.61798600  | 3.37622300 |
| C | -2.25106100 | -0.18686700 | 1.09187000 |
| C | -1.54796800 | 0.58987000  | 4.76287800 |
| C | -3.09227300 | 1.61884900  | 3.03075100 |
| C | -3.16656500 | 0.80336200  | 0.72955000 |
| C | -1.67076800 | 1.92621100  | 5.49940400 |

|   |             |             |             |
|---|-------------|-------------|-------------|
| H | -0.49932700 | 0.28479700  | 4.68451700  |
| C | -3.53279400 | 2.68906900  | 4.01558200  |
| C | -3.58871300 | 1.68238900  | 1.72452500  |
| C | -3.12297300 | 2.40314300  | 5.46189800  |
| H | -1.32002300 | 1.80987500  | 6.53138500  |
| H | -3.09052200 | 3.64749400  | 3.70557300  |
| H | -4.29888300 | 2.46364600  | 1.46343600  |
| H | -3.76852500 | 1.62177000  | 5.88697200  |
| H | -4.61946100 | 2.82460100  | 3.94299200  |
| H | -3.26455500 | 3.30134200  | 6.07402400  |
| H | -1.02579900 | 2.67790700  | 5.02389300  |
| H | -2.03845900 | -0.17924800 | 5.37250900  |
| C | -2.44802300 | -2.54375800 | 4.39247800  |
| H | -2.35156100 | -2.31435400 | 5.46365000  |
| H | -3.18383600 | -1.84755800 | 3.98274500  |
| C | -2.94209100 | -3.99861200 | 4.23974100  |
| H | -3.15311600 | -4.16986300 | 3.17765900  |
| H | -3.89225000 | -4.11847500 | 4.77217700  |
| C | -1.90116500 | -5.03683100 | 4.73999000  |
| H | -1.75780600 | -5.80791300 | 3.97556200  |
| H | -2.26830000 | -5.54840400 | 5.63675200  |
| C | -0.53024800 | -4.39260200 | 5.05642100  |
| H | 0.24104600  | -5.16411600 | 5.15027200  |
| H | -0.59270600 | -3.89129100 | 6.03309300  |
| C | 2.46626200  | -2.87121300 | 1.30725900  |
| C | 3.00253200  | -4.16682800 | 1.26218900  |
| C | 2.98210000  | -1.91982300 | 0.41109400  |
| C | 3.97980800  | -4.54234500 | 0.33451500  |
| H | 2.61533700  | -4.92275200 | 1.93134300  |
| C | 3.91022200  | -2.26825200 | -0.56712400 |

|   |             |             |             |
|---|-------------|-------------|-------------|
| H | 2.61697400  | -0.90981300 | 0.45930600  |
| C | 4.40435400  | -3.58033200 | -0.58647100 |
| H | 5.11201500  | -3.86034600 | -1.35648100 |
| C | -3.62435600 | 0.95556600  | -0.68179400 |
| C | -2.99202900 | 1.89217500  | -1.50588900 |
| C | -4.68959200 | 0.19811600  | -1.18197900 |
| C | -3.41063900 | 2.09234100  | -2.82609400 |
| H | -2.15086700 | 2.43637000  | -1.09865000 |
| C | -5.14731900 | 0.38146100  | -2.49304000 |
| H | -5.15676200 | -0.52880000 | -0.52904400 |
| C | -4.49003500 | 1.32983600  | -3.28977000 |
| H | -4.84175400 | 1.48649400  | -4.30415900 |
| C | -6.33799000 | -0.39492800 | -3.07382600 |
| C | -7.42735300 | 0.60473500  | -3.51937000 |
| H | -8.29175900 | 0.06681200  | -3.92624800 |
| H | -7.76842100 | 1.20963700  | -2.67214300 |
| H | -7.06380600 | 1.28785000  | -4.29363000 |
| C | -6.95786300 | -1.35859200 | -2.04982100 |
| H | -7.79691900 | -1.89295200 | -2.50904300 |
| H | -6.23673600 | -2.10633500 | -1.70872100 |
| H | -7.34364400 | -0.82190600 | -1.17598400 |
| C | -5.86830900 | -1.21838400 | -4.29224000 |
| H | -5.42032200 | -0.58133400 | -5.06280800 |
| H | -5.13200500 | -1.96894600 | -3.98932600 |
| H | -6.71535500 | -1.74672900 | -4.74575100 |
| C | -2.76322500 | 3.14621400  | -3.73737600 |
| C | -1.46590400 | 3.71184400  | -3.13328100 |
| H | -0.74120900 | 2.92193800  | -2.90779500 |
| H | -1.00239300 | 4.40739700  | -3.84138800 |
| H | -1.65546200 | 4.26365900  | -2.20702900 |

|   |             |             |             |
|---|-------------|-------------|-------------|
| C | -3.76845500 | 4.30448200  | -3.92357100 |
| H | -4.69449600 | 3.95567400  | -4.39313100 |
| H | -4.02954900 | 4.74975900  | -2.95748700 |
| H | -3.33883200 | 5.08857300  | -4.55871000 |
| C | -2.42521100 | 2.55005100  | -5.12050900 |
| H | -3.30636300 | 2.13691400  | -5.62090800 |
| H | -2.01385000 | 3.32993300  | -5.77147600 |
| H | -1.67827800 | 1.75518800  | -5.04067000 |
| C | 4.30030900  | -1.28568000 | -1.68106100 |
| C | 3.79283700  | 0.14282700  | -1.41340800 |
| H | 4.18221600  | 0.54054600  | -0.46949800 |
| H | 4.13356100  | 0.80553800  | -2.21798200 |
| H | 2.69979000  | 0.19719800  | -1.38070000 |
| C | 5.83205200  | -1.23000500 | -1.84810400 |
| H | 6.31209600  | -0.88481600 | -0.92546600 |
| H | 6.25495900  | -2.20731900 | -2.10066300 |
| H | 6.10149100  | -0.53559900 | -2.65304800 |
| C | 3.64690200  | -1.78475500 | -2.99020500 |
| H | 3.99054000  | -2.79107900 | -3.25202400 |
| H | 2.55802100  | -1.81827000 | -2.88098200 |
| H | 3.89232700  | -1.11434000 | -3.82378200 |
| C | 4.55370500  | -5.96918600 | 0.35700200  |
| C | 5.27641900  | -6.31916000 | -0.95616000 |
| H | 6.15387100  | -5.68583600 | -1.12585900 |
| H | 5.62541500  | -7.35665500 | -0.91796700 |
| H | 4.60793700  | -6.22238700 | -1.81876400 |
| C | 5.57068100  | -6.04962900 | 1.51758600  |
| H | 5.08733100  | -5.83566400 | 2.47725900  |
| H | 6.01390600  | -7.05151400 | 1.57434500  |
| H | 6.37902500  | -5.32240700 | 1.38023600  |

|   |             |             |             |
|---|-------------|-------------|-------------|
| C | 3.45047800  | -7.02671400 | 0.58267900  |
| H | 2.95926200  | -6.90814800 | 1.55406000  |
| H | 2.67455300  | -7.00722400 | -0.19015300 |
| H | 3.90013700  | -8.02658400 | 0.57668400  |
| O | 0.56485300  | -0.64317200 | 0.95683300  |
| O | -1.78849400 | -1.04999500 | 0.11020600  |
| P | -0.24587600 | -0.80281500 | -0.45597600 |
| O | 0.07030300  | -2.03228700 | -1.24822700 |
| O | -0.13887900 | 0.56098700  | -1.12594000 |
| H | -0.89335900 | -3.31516500 | -3.21861200 |
| C | -1.78464700 | -3.38148200 | -3.84374800 |
| S | -0.08969000 | -5.80682700 | -1.53580000 |
| O | 0.39095100  | -7.24354100 | -1.38832600 |
| C | 1.33099800  | -4.81499100 | -2.10905800 |
| H | 1.48051600  | -5.06871200 | -3.16001300 |
| H | 1.10541800  | -3.75422600 | -1.98588400 |
| H | 2.20911900  | -5.07764500 | -1.51878300 |
| C | -0.19060000 | -5.09391200 | 0.14711700  |
| H | 0.70106100  | -5.38697400 | 0.70209100  |
| H | -0.25561400 | -4.00686900 | 0.08093800  |
| H | -1.08204700 | -5.50933300 | 0.62384800  |
| C | -0.74962600 | -1.50856300 | -5.24868300 |
| C | -0.15524700 | -0.48330200 | -4.50082300 |
| C | 1.05195500  | 0.11188600  | -4.83020400 |
| C | 1.67822300  | -0.35253300 | -5.99056900 |
| C | 1.09696200  | -1.36132600 | -6.76644000 |
| C | -0.12061600 | -1.95286700 | -6.40358300 |
| C | -1.98743000 | -1.95947100 | -4.49962900 |
| C | -2.03309000 | -0.96126900 | -3.38034400 |
| H | 1.48955800  | 0.88429400  | -4.20733000 |

|   |             |             |             |
|---|-------------|-------------|-------------|
| H | 2.62938100  | 0.07504100  | -6.29076600 |
| H | 1.60328000  | -1.69930500 | -7.66527300 |
| H | -0.55602600 | -2.73696500 | -7.01200500 |
| H | -2.90566100 | -1.96998000 | -5.09316000 |
| H | -2.75073200 | -0.91673800 | -2.57104600 |
| N | -0.99345500 | -0.19102100 | -3.39842300 |
| H | -0.66057800 | 0.34761400  | -2.50094800 |
| C | -1.46685800 | -4.41673000 | -4.91075600 |
| O | -0.57516200 | -5.22808200 | -4.84356200 |
| O | -2.31390300 | -4.33277300 | -5.96807800 |
| C | -2.11104200 | -5.33006700 | -6.98712300 |
| H | -2.86971900 | -5.13172200 | -7.74380400 |
| H | -1.10709400 | -5.24225500 | -7.40992300 |
| H | -2.23181600 | -6.33023300 | -6.56530300 |
| C | -2.95412000 | -3.79298800 | -2.95800700 |
| C | -4.10757200 | -4.40853500 | -3.45737100 |
| C | -2.86076500 | -3.52613200 | -1.58676100 |
| C | -5.14382700 | -4.76266500 | -2.59161900 |
| H | -4.19631400 | -4.61725000 | -4.51793500 |
| C | -3.90324400 | -3.86364700 | -0.72712800 |
| H | -1.97134900 | -3.04653700 | -1.19857100 |
| C | -5.04541200 | -4.49314700 | -1.22588900 |
| H | -6.03091300 | -5.24817200 | -2.98822600 |
| H | -3.81095600 | -3.63769000 | 0.33151500  |
| H | -5.85549600 | -4.76949100 | -0.55688600 |

#### **S-int4**

|   |             |             |            |
|---|-------------|-------------|------------|
| C | 0.21445800  | -3.50869300 | 3.59765600 |
| C | -0.85014800 | -2.61889800 | 3.35585500 |
| H | 2.20912000  | -4.10392500 | 3.05986800 |



|   |             |             |            |
|---|-------------|-------------|------------|
| C | 1.41023100  | -3.38529800 | 2.89292800 |
| C | -0.67876300 | -1.55770700 | 2.44497000 |
| C | 0.54024400  | -1.47412400 | 1.75269000 |
| C | 1.58823800  | -2.38903300 | 1.92551500 |
| C | -1.74193900 | -0.55297400 | 2.14440800 |
| C | -2.31486700 | 0.24372700  | 3.16611000 |
| C | -2.14230200 | -0.34170500 | 0.81164300 |
| C | -1.75327600 | 0.20220600  | 4.57722100 |
| C | -3.36063300 | 1.12849700  | 2.85174900 |
| C | -3.16140500 | 0.56052200  | 0.48504700 |
| C | -2.09352300 | 1.45402500  | 5.39003700 |
| H | -0.66957300 | 0.05287900  | 4.52943300 |
| C | -4.00938500 | 2.02786000  | 3.89102800 |
| C | -3.77972200 | 1.25169800  | 1.52480700 |
| C | -3.60009300 | 1.70707300  | 5.33018200 |
| H | -1.75632500 | 1.32179900  | 6.42469000 |
| H | -3.73222600 | 3.06865500  | 3.66771400 |
| H | -4.57309700 | 1.95458500  | 1.28084900 |
| H | -4.12770400 | 0.80853300  | 5.67957100 |
| H | -5.10056100 | 1.98031700  | 3.78160400 |
| H | -3.89556800 | 2.52808800  | 5.99367500 |
| H | -1.55814000 | 2.32422100  | 4.98578500 |
| H | -2.15207100 | -0.66485500 | 5.11594200 |
| C | -2.15524600 | -2.95746000 | 4.03485200 |
| H | -2.07637500 | -2.75903900 | 5.11408600 |
| H | -2.96638400 | -2.33034100 | 3.65637300 |
| C | -2.49643100 | -4.44775800 | 3.82886700 |
| H | -2.73057900 | -4.62052900 | 2.77526300 |
| H | -3.40236100 | -4.68552100 | 4.39797600 |
| C | -1.33719600 | -5.39279100 | 4.23521400 |

|   |             |             |             |
|---|-------------|-------------|-------------|
| H | -1.15041700 | -6.08254300 | 3.40564900  |
| H | -1.61817700 | -6.00894000 | 5.09698400  |
| C | -0.03798100 | -4.62635100 | 4.57780000  |
| H | 0.81647600  | -5.31163700 | 4.61002300  |
| H | -0.13463600 | -4.20445900 | 5.58908200  |
| C | 2.72561100  | -2.38331700 | 0.97346700  |
| C | 3.04033900  | -3.56167800 | 0.28691200  |
| C | 3.36058500  | -1.19112700 | 0.61264500  |
| C | 3.92714300  | -3.55276700 | -0.79190200 |
| H | 2.51932200  | -4.46931100 | 0.56391700  |
| C | 4.23986100  | -1.14016700 | -0.46921600 |
| H | 3.10475800  | -0.29004200 | 1.15023700  |
| C | 4.50724500  | -2.33145000 | -1.15369700 |
| H | 5.16386800  | -2.30217000 | -2.01721100 |
| C | -3.52418000 | 0.86912900  | -0.92840600 |
| C | -2.73953500 | 1.78742400  | -1.63767000 |
| C | -4.66140600 | 0.31895800  | -1.52875500 |
| C | -3.07616200 | 2.16820300  | -2.94036000 |
| H | -1.85545200 | 2.17854500  | -1.15446200 |
| C | -5.03001000 | 0.67398900  | -2.83397900 |
| H | -5.25320300 | -0.39083300 | -0.96404900 |
| C | -4.22156900 | 1.59626600  | -3.51221600 |
| H | -4.50111500 | 1.88685600  | -4.51973200 |
| C | -6.27782300 | 0.10907100  | -3.52795700 |
| C | -7.22912600 | 1.27442500  | -3.87680300 |
| H | -8.13116600 | 0.89280300  | -4.36967000 |
| H | -7.53494100 | 1.81136100  | -2.97192800 |
| H | -6.75878800 | 1.99697300  | -4.55173300 |
| C | -7.03728600 | -0.88898900 | -2.63822000 |
| H | -7.91730200 | -1.26002500 | -3.17533100 |

|   |             |             |             |
|---|-------------|-------------|-------------|
| H | -6.41121400 | -1.74816800 | -2.38283700 |
| H | -7.39001600 | -0.41777600 | -1.71368900 |
| C | -5.85959200 | -0.62169200 | -4.82295100 |
| H | -5.32696300 | 0.04429500  | -5.51036600 |
| H | -5.21330800 | -1.47157400 | -4.58633800 |
| H | -6.74620400 | -0.99969900 | -5.34608300 |
| C | -2.26399500 | 3.20926100  | -3.72621600 |
| C | -1.00488900 | 3.65764700  | -2.96383500 |
| H | -0.35091600 | 2.81745200  | -2.70975300 |
| H | -0.43464200 | 4.36129500  | -3.58046000 |
| H | -1.26251200 | 4.17046400  | -2.03100600 |
| C | -3.15682800 | 4.44661400  | -3.96728600 |
| H | -4.04725800 | 4.19345800  | -4.55236900 |
| H | -3.49106900 | 4.87363600  | -3.01556500 |
| H | -2.60116800 | 5.21838200  | -4.51338700 |
| C | -1.82560400 | 2.63407600  | -5.09032200 |
| H | -2.67842600 | 2.29155900  | -5.68510000 |
| H | -1.30224800 | 3.40256100  | -5.67089200 |
| H | -1.14379800 | 1.78750500  | -4.96345600 |
| C | 4.79509200  | 0.19070800  | -0.99413500 |
| C | 4.55512600  | 1.35082300  | -0.01277400 |
| H | 5.00714100  | 1.15045500  | 0.96523900  |
| H | 5.00512100  | 2.26762400  | -0.40992400 |
| H | 3.48745400  | 1.54301900  | 0.13259900  |
| C | 6.31027400  | 0.08676100  | -1.25866700 |
| H | 6.85046300  | -0.15890100 | -0.33746700 |
| H | 6.54860500  | -0.68110500 | -2.00140000 |
| H | 6.69561100  | 1.04137200  | -1.63604200 |
| C | 4.05264300  | 0.51719400  | -2.31099700 |
| H | 4.20494000  | -0.27313100 | -3.05463200 |

|   |             |             |             |
|---|-------------|-------------|-------------|
| H | 2.97634600  | 0.60669900  | -2.12490800 |
| H | 4.41548100  | 1.46266900  | -2.73418300 |
| C | 4.22222700  | -4.80512700 | -1.62896900 |
| C | 3.81494400  | -4.54105500 | -3.09613100 |
| H | 4.39885000  | -3.72736500 | -3.53714300 |
| H | 3.97783800  | -5.43783100 | -3.70738600 |
| H | 2.76049400  | -4.25777500 | -3.16654500 |
| C | 5.72977900  | -5.12770500 | -1.56403900 |
| H | 6.03839400  | -5.33314700 | -0.53304900 |
| H | 5.96322300  | -6.00886000 | -2.17445300 |
| H | 6.33392200  | -4.29261600 | -1.93259800 |
| C | 3.44391300  | -6.03362100 | -1.12953400 |
| H | 3.70252500  | -6.28579000 | -0.09543100 |
| H | 2.36209200  | -5.87021500 | -1.17854800 |
| H | 3.68143600  | -6.90296000 | -1.75340900 |
| O | 0.67943800  | -0.45889100 | 0.81292700  |
| O | -1.54790100 | -1.05512700 | -0.21716900 |
| P | 0.03560700  | -0.73731800 | -0.66795100 |
| O | 0.48956200  | -1.99008600 | -1.34603500 |
| O | 0.12222800  | 0.59743500  | -1.39558500 |
| H | -1.18667100 | -2.91483400 | -2.17996500 |
| C | -1.90343900 | -3.30037400 | -2.91282500 |
| S | -1.58544500 | -6.09492500 | -0.08656900 |
| O | -2.63072400 | -6.20271900 | 1.02197800  |
| C | -0.31927600 | -7.37134100 | 0.26620500  |
| H | -0.80252300 | -8.34576700 | 0.16538400  |
| H | 0.49365600  | -7.28203100 | -0.45957000 |
| H | 0.05319000  | -7.24569700 | 1.28704900  |
| C | -0.53290800 | -4.66919500 | 0.32357900  |
| H | -0.16234000 | -4.78263000 | 1.34200600  |

|   |             |             |             |
|---|-------------|-------------|-------------|
| H | 0.29260900  | -4.58396600 | -0.38239700 |
| H | -1.14550100 | -3.77257700 | 0.25172300  |
| C | -0.51892000 | -2.29025500 | -4.80159200 |
| C | 0.12997900  | -1.13047400 | -4.36335900 |
| C | 1.45221200  | -0.83219100 | -4.64816400 |
| C | 2.14035200  | -1.75735800 | -5.43719500 |
| C | 1.50845500  | -2.91451900 | -5.90892200 |
| C | 0.17357300  | -3.19773200 | -5.59236100 |
| C | -1.88191900 | -2.31598500 | -4.15549700 |
| C | -1.93790900 | -0.96702600 | -3.51072600 |
| H | 1.92912500  | 0.05904400  | -4.25839400 |
| H | 3.18173800  | -1.57614300 | -5.68388000 |
| H | 2.06891700  | -3.61525900 | -6.52003200 |
| H | -0.29496100 | -4.11292600 | -5.93663400 |
| H | -2.73149600 | -2.54463600 | -4.80199200 |
| H | -2.73490800 | -0.58268300 | -2.88962200 |
| N | -0.78591700 | -0.37485000 | -3.58600900 |
| H | -0.45039300 | 0.31517400  | -2.82680100 |
| C | -3.28363600 | -3.28271100 | -2.27703500 |
| O | -4.30191100 | -2.92749700 | -2.84318600 |
| O | -3.22623800 | -3.72161600 | -1.02202900 |
| C | -4.44900800 | -3.77908300 | -0.25818700 |
| H | -4.64655200 | -2.78860800 | 0.16072100  |
| H | -5.27785100 | -4.08753900 | -0.89725100 |
| H | -4.24838300 | -4.51310400 | 0.52121500  |
| C | -1.46344200 | -4.69617700 | -3.29226900 |
| C | -0.12635100 | -5.05373300 | -3.08228600 |
| C | -2.34424300 | -5.61678700 | -3.86483800 |
| C | 0.32018200  | -6.32783600 | -3.42798500 |
| H | 0.54825100  | -4.31982000 | -2.65136800 |

|   |             |             |             |
|---|-------------|-------------|-------------|
| C | -1.89830700 | -6.89490200 | -4.20293400 |
| H | -3.38202400 | -5.33898700 | -4.03041200 |
| C | -0.56705800 | -7.25298900 | -3.98312300 |
| H | 1.36009200  | -6.59525700 | -3.26778400 |
| H | -2.59126700 | -7.61121900 | -4.63482900 |
| H | -0.22137800 | -8.24843900 | -4.24718400 |

**R-int5**

|   |             |             |            |
|---|-------------|-------------|------------|
| C | -0.00027800 | -2.67237900 | 4.82772400 |
| C | -0.93115300 | -1.69980800 | 4.41967400 |
| H | 1.77793600  | -3.77573000 | 4.31061300 |
| C | 1.03787800  | -3.05233100 | 3.97755600 |
| C | -0.83046200 | -1.11441700 | 3.14329500 |
| C | 0.11948200  | -1.65226500 | 2.25636000 |
| C | 1.09917200  | -2.56754900 | 2.66899700 |
| C | -1.58912400 | 0.09672300  | 2.71389200 |
| C | -1.49955200 | 1.29977800  | 3.45802200 |
| C | -2.26124300 | 0.08924200  | 1.47851400 |
| C | -0.65190400 | 1.38657500  | 4.71598300 |
| C | -2.17670000 | 2.43638000  | 2.98854700 |
| C | -2.84158200 | 1.25409600  | 0.93758000 |
| C | -0.35003600 | 2.82223400  | 5.15600600 |
| H | 0.27752900  | 0.82433100  | 4.56783300 |
| C | -2.17701100 | 3.75526300  | 3.74094100 |
| C | -2.82654400 | 2.38773200  | 1.75806800 |
| C | -1.63784900 | 3.64501800  | 5.16730700 |
| H | 0.12130300  | 2.80849500  | 6.14592000 |
| H | -1.56074000 | 4.47559700  | 3.18278900 |
| H | -3.33403600 | 3.28409900  | 1.41467000 |
| H | -2.37719700 | 3.14917400  | 5.81144900 |

|   |             |             |             |
|---|-------------|-------------|-------------|
| H | -3.19323700 | 4.16927300  | 3.74420200  |
| H | -1.46908300 | 4.64440000  | 5.58536700  |
| H | 0.36492200  | 3.28949600  | 4.46660700  |
| H | -1.16449600 | 0.88965700  | 5.54663500  |
| C | -2.07611200 | -1.44752600 | 5.36973600  |
| H | -1.72151900 | -0.94841700 | 6.28320000  |
| H | -2.82433600 | -0.79309800 | 4.91493300  |
| C | -2.70697100 | -2.79977400 | 5.76577500  |
| H | -3.16692400 | -3.23035700 | 4.87030300  |
| H | -3.51567100 | -2.62598700 | 6.48439400  |
| C | -1.66242800 | -3.78981600 | 6.34945400  |
| H | -1.75174500 | -4.75583100 | 5.84167600  |
| H | -1.85769600 | -3.97438600 | 7.41195000  |
| C | -0.20985300 | -3.27960900 | 6.19091100  |
| H | 0.50205000  | -4.09235400 | 6.37001300  |
| H | -0.01792300 | -2.52085400 | 6.96410800  |
| C | 2.17939300  | -2.90614400 | 1.70494500  |
| C | 1.85862800  | -3.53489400 | 0.49578500  |
| C | 3.47856700  | -2.43634400 | 1.91534800  |
| C | 2.80136400  | -3.65112900 | -0.52628400 |
| H | 0.83927500  | -3.86889100 | 0.35289300  |
| C | 4.44909600  | -2.51186100 | 0.90237100  |
| H | 3.71284900  | -1.96550800 | 2.86705200  |
| C | 4.08236800  | -3.11138700 | -0.30802300 |
| H | 4.80720900  | -3.15654200 | -1.10945500 |
| C | -3.35733400 | 1.35805100  | -0.45163600 |
| C | -3.29037200 | 2.59482900  | -1.10652100 |
| C | -3.86721600 | 0.25960000  | -1.16004400 |
| C | -3.72692000 | 2.76217400  | -2.42486200 |
| H | -2.87042500 | 3.44225100  | -0.57918100 |

|   |             |             |             |
|---|-------------|-------------|-------------|
| C | -4.23622600 | 0.36746000  | -2.49853300 |
| H | -3.94053900 | -0.68847900 | -0.65612200 |
| C | -4.17354800 | 1.62956700  | -3.11107700 |
| H | -4.47432300 | 1.72134000  | -4.14767300 |
| C | -4.62292200 | -0.87127700 | -3.31865600 |
| C | -4.82067200 | -2.11774500 | -2.43753900 |
| H | -5.13183600 | -2.96122000 | -3.06397500 |
| H | -3.89824800 | -2.41131900 | -1.92651500 |
| H | -5.59775300 | -1.95784300 | -1.68157900 |
| C | -3.46631300 | -1.16333700 | -4.30119200 |
| H | -3.68536700 | -2.05623400 | -4.89981500 |
| H | -3.30722800 | -0.32699000 | -4.99143100 |
| H | -2.53777800 | -1.33609500 | -3.74705200 |
| C | -5.92674100 | -0.62222800 | -4.10340200 |
| H | -6.75610000 | -0.40208800 | -3.42168000 |
| H | -5.83577900 | 0.21525000  | -4.80272200 |
| H | -6.19229000 | -1.51126900 | -4.68746000 |
| C | -3.76031200 | 4.17295400  | -3.03378300 |
| C | -2.42232900 | 4.90841300  | -2.80781900 |
| H | -1.59130900 | 4.36383200  | -3.26373500 |
| H | -2.46277300 | 5.90844000  | -3.25623300 |
| H | -2.20408500 | 5.03866900  | -1.74307700 |
| C | -4.88920700 | 4.96529200  | -2.33620100 |
| H | -5.85657500 | 4.47260100  | -2.48290500 |
| H | -4.71149100 | 5.03660100  | -1.25790200 |
| H | -4.95558100 | 5.98324400  | -2.74047700 |
| C | -4.04847000 | 4.15464100  | -4.54432700 |
| H | -5.03212200 | 3.72721100  | -4.76501700 |
| H | -4.03964900 | 5.17825400  | -4.93517400 |
| H | -3.29527900 | 3.57995300  | -5.09236000 |



|   |             |             |             |
|---|-------------|-------------|-------------|
| C | 5.84379600  | -1.91309000 | 1.13780000  |
| C | 6.55525200  | -2.72026100 | 2.24393300  |
| H | 6.67036500  | -3.76812900 | 1.94611300  |
| H | 7.55186200  | -2.30749000 | 2.44160800  |
| H | 5.98840100  | -2.69992700 | 3.18068000  |
| C | 6.71054400  | -1.93888900 | -0.13208600 |
| H | 6.88746400  | -2.95996500 | -0.48612000 |
| H | 6.24265800  | -1.36364700 | -0.93898700 |
| H | 7.68626400  | -1.48791600 | 0.07893100  |
| C | 5.71426800  | -0.43720300 | 1.57761100  |
| H | 5.22239600  | 0.15715900  | 0.80064500  |
| H | 5.14879800  | -0.33924100 | 2.51144300  |
| H | 6.70677200  | -0.00706100 | 1.75575800  |
| C | 2.41481000  | -4.25351400 | -1.88532500 |
| C | 3.58822600  | -5.04327800 | -2.49775800 |
| H | 3.92649700  | -5.83527300 | -1.82029500 |
| H | 3.26981900  | -5.51141300 | -3.43572200 |
| H | 4.44786100  | -4.40570700 | -2.73029300 |
| C | 1.20315900  | -5.19833600 | -1.76247200 |
| H | 0.29693100  | -4.67072800 | -1.45215500 |
| H | 1.00338600  | -5.66031300 | -2.73598700 |
| H | 1.40036200  | -6.00090400 | -1.04252700 |
| C | 2.02966800  | -3.09424900 | -2.83161300 |
| H | 1.16917800  | -2.54411200 | -2.43423500 |
| H | 2.86918300  | -2.40031400 | -2.96688100 |
| H | 1.75407900  | -3.48044500 | -3.82030700 |
| O | 0.13170800  | -1.22383500 | 0.94547700  |
| O | -2.36918500 | -1.11695700 | 0.81347000  |
| P | -1.11677200 | -1.74065600 | -0.07725100 |
| O | -1.26406200 | -3.22018900 | -0.08876700 |

|   |             |             |             |
|---|-------------|-------------|-------------|
| O | -0.86590800 | -0.93911200 | -1.33317700 |
| H | 1.65166700  | -0.44838000 | -2.71144800 |
| C | 1.87306100  | 0.58696200  | -2.42869500 |
| C | 1.12815300  | 2.06534100  | -0.32005800 |
| C | 1.67505800  | 1.99772000  | 0.97081200  |
| C | 1.56138200  | 3.01202400  | 1.90816000  |
| C | 0.85269800  | 4.14958100  | 1.51427400  |
| C | 0.27610300  | 4.23283300  | 0.24120000  |
| C | 0.39798100  | 3.19177200  | -0.68492800 |
| C | 1.35762800  | 0.73594000  | -0.98289200 |
| C | 2.15638400  | 0.01121200  | 0.01706100  |
| H | 1.99238400  | 2.92569300  | 2.89993900  |
| H | 0.73908900  | 4.97260800  | 2.21261800  |
| H | -0.28322900 | 5.12202700  | -0.03336300 |
| H | -0.07674700 | 3.25471500  | -1.65562900 |
| H | 0.36936700  | 0.18559000  | -1.00763900 |
| H | 2.56708700  | -0.98241400 | -0.06467300 |
| N | 2.29882000  | 0.73033100  | 1.10126100  |
| H | 2.74970200  | 0.37866800  | 1.93828900  |
| C | 3.39126700  | 0.67065200  | -2.47304800 |
| O | 4.10529100  | 0.76669300  | -1.49019300 |
| O | 3.86674700  | 0.52904600  | -3.71568400 |
| C | 5.30043700  | 0.49450400  | -3.83674100 |
| H | 5.70295900  | -0.37347500 | -3.30810200 |
| H | 5.49770600  | 0.41989400  | -4.90545300 |
| H | 5.74049300  | 1.40411400  | -3.42177400 |
| C | 1.13103300  | 1.47627200  | -3.40872700 |
| C | -0.17862600 | 1.12245500  | -3.75759600 |
| C | 1.69163600  | 2.64422600  | -3.93316800 |
| C | -0.89826800 | 1.91028300  | -4.65284200 |

|   |             |            |             |
|---|-------------|------------|-------------|
| H | -0.63672600 | 0.24838000 | -3.30401300 |
| C | 0.96829600  | 3.43145000 | -4.82922400 |
| H | 2.69875400  | 2.93947100 | -3.65435000 |
| C | -0.32401500 | 3.05903000 | -5.20057400 |
| H | -1.91250100 | 1.62603600 | -4.90933100 |
| H | 1.41634800  | 4.33291700 | -5.23758800 |
| H | -0.88594300 | 3.66945300 | -5.90176600 |

**S-int5**

|   |             |             |            |
|---|-------------|-------------|------------|
| C | 0.09166500  | -3.31562700 | 4.52104700 |
| C | -0.83485600 | -2.32085200 | 4.15790600 |
| H | 1.87228200  | -4.38973200 | 3.96126100 |
| C | 1.14553500  | -3.63597200 | 3.66827600 |
| C | -0.70312300 | -1.64165700 | 2.93241000 |
| C | 0.27646500  | -2.10577200 | 2.03090200 |
| C | 1.23827300  | -3.05977400 | 2.39739600 |
| C | -1.48206200 | -0.42078600 | 2.56639300 |
| C | -1.45214100 | 0.74255100  | 3.37711100 |
| C | -2.12291800 | -0.37153200 | 1.31922400 |
| C | -0.68446000 | 0.75902300  | 4.68783500 |
| C | -2.11328700 | 1.89889900  | 2.93054000 |
| C | -2.70802600 | 0.80321300  | 0.81849500 |
| C | -0.42523400 | 2.16192800  | 5.24373500 |
| H | 0.25835700  | 0.21416300  | 4.56365700 |
| C | -2.14560000 | 3.17915200  | 3.74661700 |
| C | -2.71439600 | 1.90949400  | 1.67125000 |
| C | -1.70962000 | 2.98924100  | 5.19997700 |
| H | -0.04283000 | 2.08135700  | 6.26825700 |
| H | -1.48335300 | 3.91817500  | 3.27066200 |
| H | -3.20051600 | 2.82102400  | 1.33256400 |

|   |             |             |             |
|---|-------------|-------------|-------------|
| H | -2.49576400 | 2.46356800  | 5.75951100  |
| H | -3.15319700 | 3.61095600  | 3.70200100  |
| H | -1.57175000 | 3.96394100  | 5.68267800  |
| H | 0.35034200  | 2.66655700  | 4.65478100  |
| H | -1.24601800 | 0.20513500  | 5.44776400  |
| C | -2.01238500 | -2.15273600 | 5.08697800  |
| H | -1.69414500 | -1.71689600 | 6.04493000  |
| H | -2.75623100 | -1.47739600 | 4.65624100  |
| C | -2.63558400 | -3.53799400 | 5.36253400  |
| H | -3.05390800 | -3.91041900 | 4.42162400  |
| H | -3.47402400 | -3.42660200 | 6.05906000  |
| C | -1.59839700 | -4.55215500 | 5.91605600  |
| H | -1.66293200 | -5.48658400 | 5.34881700  |
| H | -1.82242700 | -4.80220000 | 6.95930100  |
| C | -0.14758800 | -4.01938000 | 5.83188700  |
| H | 0.56810900  | -4.83631900 | 5.97281300  |
| H | 0.01602900  | -3.31501200 | 6.66087100  |
| C | 2.33021200  | -3.39365200 | 1.44507900  |
| C | 2.02341900  | -3.90238000 | 0.18231800  |
| C | 3.66454600  | -3.09616800 | 1.76658300  |
| C | 3.01815800  | -4.09584600 | -0.78454400 |
| H | 0.98551500  | -4.10228600 | -0.05017600 |
| C | 4.68440000  | -3.25584400 | 0.82067000  |
| H | 3.88330600  | -2.72132000 | 2.76198800  |
| C | 4.33483100  | -3.75660500 | -0.44595100 |
| H | 5.11705400  | -3.87899000 | -1.18576300 |
| C | -3.20656600 | 0.91498200  | -0.57344400 |
| C | -2.94249900 | 2.08797400  | -1.29398400 |
| C | -3.89444500 | -0.12889600 | -1.20347100 |
| C | -3.35154400 | 2.23770600  | -2.62126300 |

|   |             |             |             |
|---|-------------|-------------|-------------|
| H | -2.38082000 | 2.87399300  | -0.80591100 |
| C | -4.28736000 | -0.03103900 | -2.53857800 |
| H | -4.09333600 | -1.02809300 | -0.64178300 |
| C | -4.01554400 | 1.16128200  | -3.22260500 |
| H | -4.32591800 | 1.25199900  | -4.25884800 |
| C | -4.96761100 | -1.19542000 | -3.27228500 |
| C | -5.19178000 | -2.41026000 | -2.35593200 |
| H | -5.67203600 | -3.21455400 | -2.92446100 |
| H | -4.24803200 | -2.79891000 | -1.95862700 |
| H | -5.84492300 | -2.16463300 | -1.51124300 |
| C | -4.06117600 | -1.64447900 | -4.43944900 |
| H | -4.52801400 | -2.46941300 | -4.99124800 |
| H | -3.87745800 | -0.82826700 | -5.14658600 |
| H | -3.09471400 | -1.98986500 | -4.05787500 |
| C | -6.33418800 | -0.73816600 | -3.82371800 |
| H | -6.99245500 | -0.41533800 | -3.00938100 |
| H | -6.23211400 | 0.09844000  | -4.52273000 |
| H | -6.82655500 | -1.56101500 | -4.35592600 |
| C | -3.12139500 | 3.53259500  | -3.41495600 |
| C | -2.27657800 | 4.55355500  | -2.63438900 |
| H | -1.28216900 | 4.15526400  | -2.40591000 |
| H | -2.14109500 | 5.45746800  | -3.23858800 |
| H | -2.75860200 | 4.85154400  | -1.69657300 |
| C | -4.49453200 | 4.16886900  | -3.72272900 |
| H | -5.12354400 | 3.49370500  | -4.31211100 |
| H | -5.03215000 | 4.40230100  | -2.79673000 |
| H | -4.36921500 | 5.09836100  | -4.29173200 |
| C | -2.38539100 | 3.22865500  | -4.73697000 |
| H | -2.94679200 | 2.52699400  | -5.36255800 |
| H | -2.25309500 | 4.15181800  | -5.31466200 |

|   |             |             |             |
|---|-------------|-------------|-------------|
| H | -1.39956500 | 2.80173300  | -4.53476500 |
| C | 6.14309600  | -2.86396400 | 1.09793100  |
| C | 6.34053900  | -2.30898000 | 2.51787900  |
| H | 6.06069500  | -3.04085500 | 3.28290600  |
| H | 7.39378000  | -2.05149900 | 2.67140000  |
| H | 5.75362500  | -1.39777200 | 2.68599800  |
| C | 7.04950400  | -4.10252500 | 0.93287100  |
| H | 6.76491200  | -4.88749100 | 1.64178700  |
| H | 6.98033300  | -4.52189000 | -0.07542600 |
| H | 8.09738300  | -3.83733600 | 1.11651300  |
| C | 6.57535300  | -1.77279300 | 0.09153900  |
| H | 6.50549700  | -2.12567700 | -0.94225600 |
| H | 5.94677900  | -0.87865300 | 0.18264600  |
| H | 7.61438000  | -1.47402400 | 0.27309200  |
| C | 2.63156200  | -4.55799900 | -2.19700500 |
| C | 3.80703200  | -5.25047100 | -2.91056200 |
| H | 4.18373500  | -6.09883900 | -2.32785900 |
| H | 3.47601300  | -5.62827200 | -3.88374900 |
| H | 4.64271300  | -4.56730800 | -3.09900900 |
| C | 1.43779800  | -5.53471200 | -2.15388300 |
| H | 0.52523400  | -5.04987900 | -1.79763600 |
| H | 1.24029600  | -5.91169300 | -3.16388000 |
| H | 1.65470400  | -6.39371100 | -1.50853400 |
| C | 2.21438300  | -3.30937700 | -3.00761600 |
| H | 1.36493700  | -2.79493900 | -2.54801900 |
| H | 3.05332300  | -2.60629700 | -3.09066400 |
| H | 1.92045700  | -3.59273100 | -4.02510600 |
| O | 0.33735400  | -1.56554700 | 0.76528400  |
| O | -2.16790400 | -1.53275200 | 0.56913700  |
| P | -0.86715200 | -1.94822300 | -0.35829300 |

|   |             |             |             |
|---|-------------|-------------|-------------|
| O | -0.95633600 | -3.40827800 | -0.63214500 |
| O | -0.60109500 | -0.93282100 | -1.45040900 |
| H | 2.69594200  | -0.46474600 | -2.94096100 |
| C | 2.34803200  | 0.50145500  | -2.57044900 |
| C | 1.50354100  | 1.37993800  | -0.20067300 |
| C | 2.09230800  | 1.11949800  | 1.04604400  |
| C | 1.92662600  | 1.93123000  | 2.15998400  |
| C | 1.12832300  | 3.06174400  | 1.98663600  |
| C | 0.50775500  | 3.32960400  | 0.75925000  |
| C | 0.67820200  | 2.49053500  | -0.34283500 |
| C | 1.85718000  | 0.24898900  | -1.11755100 |
| C | 2.72988600  | -0.57915100 | -0.29433700 |
| H | 2.38432300  | 1.69900700  | 3.11623300  |
| H | 0.97569800  | 3.73779500  | 2.82047800  |
| H | -0.12639800 | 4.20582800  | 0.66573200  |
| H | 0.18483100  | 2.68508100  | -1.28581400 |
| H | 0.88170800  | -0.37465300 | -1.21774800 |
| H | 3.20824000  | -1.51265200 | -0.55773400 |
| N | 2.83536500  | -0.07807400 | 0.91366700  |
| H | 3.26466000  | -0.59631900 | 1.67471700  |
| C | 1.11970300  | 0.85254500  | -3.40148200 |
| O | 0.57180900  | 1.93885600  | -3.42893000 |
| O | 0.67687800  | -0.23450900 | -4.03106000 |
| C | -0.67251900 | -0.16693800 | -4.54097900 |
| H | -0.75071300 | 0.60249300  | -5.31166700 |
| H | -0.86656500 | -1.15458300 | -4.95584600 |
| H | -1.35415300 | 0.04147600  | -3.71597300 |
| C | 3.50968200  | 1.47542100  | -2.58799800 |
| C | 4.79913000  | 0.94811300  | -2.43822000 |
| C | 3.34905200  | 2.86339600  | -2.65497300 |

|   |            |             |             |
|---|------------|-------------|-------------|
| C | 5.90941100 | 1.78568900  | -2.34919300 |
| H | 4.93494800 | -0.13075000 | -2.39232800 |
| C | 4.46218400 | 3.70158700  | -2.57481400 |
| H | 2.35665400 | 3.27767000  | -2.77959200 |
| C | 5.74206600 | 3.16977500  | -2.41694200 |
| H | 6.90140700 | 1.35746700  | -2.23523000 |
| H | 4.32482200 | 4.77776100  | -2.63297100 |
| H | 6.60373300 | 3.82799300  | -2.35091000 |

**R-int6**

|   |             |             |            |
|---|-------------|-------------|------------|
| C | 0.00684600  | -2.47236600 | 4.88781000 |
| C | -1.00255700 | -1.56645500 | 4.51705500 |
| H | 1.86231300  | -3.40722400 | 4.32745000 |
| C | 1.07179000  | -2.72451200 | 4.02735100 |
| C | -0.94277100 | -0.91425700 | 3.27090400 |
| C | 0.06868900  | -1.31509300 | 2.37722100 |
| C | 1.11235900  | -2.17254100 | 2.74123400 |
| C | -1.84382100 | 0.21773300  | 2.90011900 |
| C | -1.91650000 | 1.38900900  | 3.69490000 |
| C | -2.51524400 | 0.19075900  | 1.67291500 |
| C | -1.06905800 | 1.53643000  | 4.94623100 |
| C | -2.73717200 | 2.44738800  | 3.26778300 |
| C | -3.23033000 | 1.28635200  | 1.16252200 |
| C | -0.93858000 | 2.98415600  | 5.42885000 |
| H | -0.08141400 | 1.09946400  | 4.76271900 |
| C | -2.89618300 | 3.72628400  | 4.07316200 |
| C | -3.36902800 | 2.37713100  | 2.02603300 |
| C | -2.31892200 | 3.63746000  | 5.48625400 |
| H | -0.45220100 | 2.99674100  | 6.41098600 |
| H | -2.39199200 | 4.54264300  | 3.53485800 |



|   |             |             |             |
|---|-------------|-------------|-------------|
| H | -3.96272400 | 3.22563500  | 1.69631200  |
| H | -2.97828100 | 3.03222000  | 6.12379700  |
| H | -3.95791900 | 4.00113100  | 4.10606800  |
| H | -2.26991900 | 4.63635600  | 5.93428500  |
| H | -0.29416200 | 3.55908200  | 4.74949700  |
| H | -1.50656100 | 0.95384900  | 5.76419500  |
| C | -2.17240300 | -1.46404400 | 5.46492100  |
| H | -1.86878600 | -0.97717000 | 6.40261100  |
| H | -2.97570200 | -0.86039400 | 5.03499600  |
| C | -2.68031800 | -2.88451800 | 5.79355000  |
| H | -3.09382100 | -3.31454600 | 4.87518900  |
| H | -3.50666200 | -2.81610200 | 6.50954700  |
| C | -1.55528400 | -3.80160600 | 6.34499300  |
| H | -1.55684200 | -4.75051900 | 5.79860500  |
| H | -1.73813900 | -4.04555700 | 7.39739900  |
| C | -0.15304700 | -3.15892900 | 6.21945700  |
| H | 0.62770700  | -3.91246500 | 6.36607100  |
| H | -0.03032800 | -2.42138400 | 7.02602600  |
| C | 2.24834700  | -2.44753500 | 1.82189100  |
| C | 2.04317100  | -2.98792500 | 0.54928700  |
| C | 3.54954400  | -2.13658700 | 2.23329200  |
| C | 3.11058200  | -3.19169000 | -0.33068300 |
| H | 1.03548200  | -3.24590200 | 0.24980900  |
| C | 4.64676200  | -2.33220000 | 1.38230200  |
| H | 3.69309900  | -1.71770700 | 3.22515200  |
| C | 4.40016100  | -2.85247400 | 0.10397900  |
| H | 5.23258000  | -2.99695300 | -0.56986900 |
| C | -3.63335600 | 1.38720400  | -0.26374500 |
| C | -3.45851100 | 2.61477200  | -0.91319800 |
| C | -4.03955300 | 0.27792000  | -1.02313800 |

|   |             |             |             |
|---|-------------|-------------|-------------|
| C | -3.65408300 | 2.75709300  | -2.29272800 |
| H | -3.11993900 | 3.46762700  | -0.33620900 |
| C | -4.17269800 | 0.36372400  | -2.40643000 |
| H | -4.19273800 | -0.66532000 | -0.52349300 |
| C | -3.98851100 | 1.61389700  | -3.01983800 |
| H | -4.09196400 | 1.68281100  | -4.09546900 |
| C | -4.41772400 | -0.87577900 | -3.27702500 |
| C | -4.59598400 | -2.15417700 | -2.44026900 |
| H | -4.78045500 | -3.00356400 | -3.10722200 |
| H | -3.70255100 | -2.38637600 | -1.85093000 |
| H | -5.45076100 | -2.07652400 | -1.75882200 |
| C | -3.18175000 | -1.07146900 | -4.18603500 |
| H | -3.30563200 | -1.96370800 | -4.81153500 |
| H | -3.02994800 | -0.21357400 | -4.85029400 |
| H | -2.27754300 | -1.19573900 | -3.58105300 |
| C | -5.67789400 | -0.67652000 | -4.14377100 |
| H | -6.56546600 | -0.54390900 | -3.51482200 |
| H | -5.59303200 | 0.20142000  | -4.79255600 |
| H | -5.84144800 | -1.55073000 | -4.78504200 |
| C | -3.47361500 | 4.13747000  | -2.94138800 |
| C | -2.04851200 | 4.66585700  | -2.67036800 |
| H | -1.29568400 | 4.00148200  | -3.10297400 |
| H | -1.91806000 | 5.65578000  | -3.12340000 |
| H | -1.84558300 | 4.76344600  | -1.59912100 |
| C | -4.50528200 | 5.11202700  | -2.33281800 |
| H | -5.52721300 | 4.76129600  | -2.51494700 |
| H | -4.37385100 | 5.21188400  | -1.25034400 |
| H | -4.39929900 | 6.10859000  | -2.77815500 |
| C | -3.68697700 | 4.09608000  | -4.46299600 |
| H | -4.69809600 | 3.76307500  | -4.72199400 |

|   |             |             |             |
|---|-------------|-------------|-------------|
| H | -3.54797500 | 5.09870700  | -4.88200100 |
| H | -2.96708700 | 3.43084700  | -4.94970500 |
| C | 6.05853900  | -1.96945200 | 1.86978200  |
| C | 6.39465100  | -2.81763600 | 3.11535600  |
| H | 6.36306000  | -3.88615600 | 2.87602500  |
| H | 7.39972600  | -2.57764300 | 3.48212300  |
| H | 5.68691700  | -2.63599100 | 3.93046200  |
| C | 7.13247000  | -2.23150800 | 0.80148000  |
| H | 7.17163200  | -3.28842500 | 0.51685900  |
| H | 6.95815900  | -1.63886900 | -0.10329700 |
| H | 8.11719600  | -1.95618700 | 1.19425700  |
| C | 6.11060100  | -0.47137700 | 2.24329400  |
| H | 5.90156900  | 0.15929500  | 1.37108400  |
| H | 5.38527400  | -0.22126600 | 3.02460000  |
| H | 7.10618600  | -0.20446300 | 2.61644400  |
| C | 2.84267200  | -3.81060300 | -1.71104400 |
| C | 4.04020200  | -3.65886500 | -2.66542500 |
| H | 4.93682900  | -4.16636700 | -2.29319600 |
| H | 3.79149200  | -4.11379800 | -3.63095100 |
| H | 4.28493600  | -2.60757500 | -2.85188100 |
| C | 2.55350200  | -5.31505600 | -1.51353500 |
| H | 1.69133300  | -5.46542600 | -0.85585900 |
| H | 2.33341500  | -5.79137200 | -2.47672500 |
| H | 3.41497200  | -5.82524900 | -1.06721100 |
| C | 1.61569000  | -3.14288600 | -2.36885500 |
| H | 0.68575300  | -3.34886700 | -1.83522700 |
| H | 1.73805300  | -2.05767200 | -2.40025800 |
| H | 1.49881500  | -3.50624900 | -3.39639800 |
| O | 0.06362600  | -0.81312600 | 1.07216600  |
| O | -2.44086100 | -0.98605300 | 0.92196200  |

|   |             |             |             |
|---|-------------|-------------|-------------|
| P | -1.10788100 | -1.33526500 | 0.06814300  |
| O | -1.12111900 | -2.74545900 | -0.35944400 |
| O | -0.96331500 | -0.29448600 | -1.12305100 |
| H | 0.46044700  | 0.19481900  | -3.11502500 |
| C | 1.42174400  | 0.71526400  | -3.20018700 |
| C | 1.39961400  | 1.59618900  | -0.74177700 |
| C | 2.14326600  | 1.30319300  | 0.43822400  |
| C | 1.78496900  | 1.80824600  | 1.68766400  |
| C | 0.65033900  | 2.61000500  | 1.76002100  |
| C | -0.10075800 | 2.91442000  | 0.61068000  |
| C | 0.26567600  | 2.42578100  | -0.64188800 |
| C | 2.00324400  | 0.84902100  | -1.82001300 |
| C | 3.06540700  | 0.17070500  | -1.27082700 |
| H | 2.35863100  | 1.56195100  | 2.57672800  |
| H | 0.33634300  | 3.00585400  | 2.71888200  |
| H | -0.98028600 | 3.54185600  | 0.70419200  |
| H | -0.30516400 | 2.69375000  | -1.52516800 |
| H | -0.68625600 | 0.60220000  | -0.82290500 |
| H | 3.76740200  | -0.49740000 | -1.73949200 |
| N | 3.17293300  | 0.46247800  | 0.07380800  |
| H | 3.70217400  | -0.10929800 | 0.71817700  |
| C | 2.28119000  | -0.14266700 | -4.12565200 |
| O | 3.49135200  | -0.22034600 | -4.12130000 |
| O | 1.50000800  | -0.80219200 | -5.00564500 |
| C | 2.20333700  | -1.60407400 | -5.96677400 |
| H | 2.77696300  | -2.38442200 | -5.46046100 |
| H | 1.43205100  | -2.04318500 | -6.59949500 |
| H | 2.88376700  | -0.98533700 | -6.55725600 |
| C | 1.15389700  | 2.03733000  | -3.92113700 |
| C | 0.11753900  | 2.11161400  | -4.85968600 |

|   |             |            |             |
|---|-------------|------------|-------------|
| C | 1.95538100  | 3.15987200 | -3.69904600 |
| C | -0.10849300 | 3.28961200 | -5.57039200 |
| H | -0.50483100 | 1.23832500 | -5.03445800 |
| C | 1.71872400  | 4.34387900 | -4.39835600 |
| H | 2.75662400  | 3.10118000 | -2.96933800 |
| C | 0.68980200  | 4.41151500 | -5.33835800 |
| H | -0.91233100 | 3.33455000 | -6.29966600 |
| H | 2.34251400  | 5.21328000 | -4.21015500 |
| H | 0.50737800  | 5.33305500 | -5.88389100 |

**S-int6**

|   |             |             |            |
|---|-------------|-------------|------------|
| C | -0.14382400 | -3.40012300 | 4.52738800 |
| C | -1.01356100 | -2.34658100 | 4.19267000 |
| H | 1.60433700  | -4.52156900 | 3.96374700 |
| C | 0.92501100  | -3.71732300 | 3.69392700 |
| C | -0.80308300 | -1.60197700 | 3.01689500 |
| C | 0.20776000  | -2.04476100 | 2.14089100 |
| C | 1.10670600  | -3.06473000 | 2.46905400 |
| C | -1.56474500 | -0.35980100 | 2.68889900 |
| C | -1.57736200 | 0.76748900  | 3.54894800 |
| C | -2.16820100 | -0.25113900 | 1.43302300 |
| C | -0.84393200 | 0.73763100  | 4.87855600 |
| C | -2.22908100 | 1.93913200  | 3.12400100 |
| C | -2.76038800 | 0.92650400  | 0.95770900 |
| C | -0.59874400 | 2.12301700  | 5.48527200 |
| H | 0.10074900  | 0.19588900  | 4.75740800 |
| C | -2.27760300 | 3.19131200  | 3.98311700 |
| C | -2.79688500 | 2.00002700  | 1.84909300 |
| C | -1.88371000 | 2.94874200  | 5.44015000 |
| H | -0.23674400 | 2.00791900  | 6.51341800 |

|   |             |             |             |
|---|-------------|-------------|-------------|
| H | -1.59478900 | 3.93861100  | 3.55127900  |
| H | -3.27024800 | 2.92375000  | 1.52575700  |
| H | -2.68440700 | 2.40314900  | 5.95858400  |
| H | -3.28031900 | 3.63174200  | 3.92162600  |
| H | -1.75990200 | 3.90568700  | 5.95962600  |
| H | 0.18846200  | 2.65364600  | 4.93271800  |
| H | -1.42688900 | 0.15949100  | 5.60383900  |
| C | -2.21758200 | -2.18171000 | 5.08768200  |
| H | -1.91527600 | -1.81097500 | 6.07741300  |
| H | -2.91941600 | -1.45420100 | 4.67211000  |
| C | -2.90600900 | -3.55207700 | 5.26552600  |
| H | -3.30850300 | -3.85418600 | 4.29280300  |
| H | -3.76204800 | -3.44183500 | 5.94016800  |
| C | -1.93204400 | -4.63945100 | 5.79345700  |
| H | -2.01699300 | -5.53811200 | 5.17358200  |
| H | -2.20141800 | -4.93571000 | 6.81332000  |
| C | -0.45824900 | -4.16722900 | 5.78553300  |
| H | 0.21777900  | -5.02076300 | 5.90099500  |
| H | -0.29235500 | -3.51776400 | 6.65736500  |
| C | 2.23732500  | -3.41412900 | 1.56759300  |
| C | 2.00880000  | -3.87322900 | 0.26734000  |
| C | 3.55211600  | -3.25721000 | 2.02835300  |
| C | 3.07398800  | -4.16264100 | -0.59255600 |
| H | 0.98847700  | -3.99246600 | -0.06943700 |
| C | 4.64408100  | -3.51174900 | 1.18802400  |
| H | 3.70347700  | -2.90704700 | 3.04301100  |
| C | 4.37470600  | -3.95325900 | -0.11583000 |
| H | 5.21100400  | -4.14982900 | -0.77807200 |
| C | -3.20114500 | 1.06109900  | -0.45205400 |
| C | -2.79333500 | 2.18055000  | -1.18597900 |

|   |             |             |             |
|---|-------------|-------------|-------------|
| C | -3.93142200 | 0.04874100  | -1.08701900 |
| C | -3.08574900 | 2.30220700  | -2.54937600 |
| H | -2.19688300 | 2.93419500  | -0.68625700 |
| C | -4.22560800 | 0.12520600  | -2.44732900 |
| H | -4.23901000 | -0.80932500 | -0.50728300 |
| C | -3.79758900 | 1.25971600  | -3.15237700 |
| H | -4.01970300 | 1.32378500  | -4.21101600 |
| C | -4.95393000 | -1.00322300 | -3.19062500 |
| C | -5.39000800 | -2.13584600 | -2.24634000 |
| H | -5.90767200 | -2.91319900 | -2.81913700 |
| H | -4.53135400 | -2.60252200 | -1.75196400 |
| H | -6.07917700 | -1.77597500 | -1.47414200 |
| C | -3.99526700 | -1.60353400 | -4.24267600 |
| H | -4.49665700 | -2.39808400 | -4.80855400 |
| H | -3.65152400 | -0.84636800 | -4.95492100 |
| H | -3.11534100 | -2.03540500 | -3.75372400 |
| C | -6.20926800 | -0.44378700 | -3.89219100 |
| H | -6.90085300 | -0.00902000 | -3.16187900 |
| H | -5.95778500 | 0.33460600  | -4.61951200 |
| H | -6.73497400 | -1.24356400 | -4.42735400 |
| C | -2.69595300 | 3.55201400  | -3.35395800 |
| C | -1.49542700 | 4.28966600  | -2.73193400 |
| H | -0.61989200 | 3.63667200  | -2.69368400 |
| H | -1.24229500 | 5.15999600  | -3.34773100 |
| H | -1.71251000 | 4.66216100  | -1.72506400 |
| C | -3.91601100 | 4.49955200  | -3.37167600 |
| H | -4.78506100 | 4.01227300  | -3.82789800 |
| H | -4.19466600 | 4.79731700  | -2.35432800 |
| H | -3.69114600 | 5.40722100  | -3.94539200 |
| C | -2.31358500 | 3.18796200  | -4.80364100 |

|   |             |             |             |
|---|-------------|-------------|-------------|
| H | -3.16228600 | 2.79126200  | -5.37034600 |
| H | -1.96933700 | 4.08632500  | -5.32898400 |
| H | -1.50668000 | 2.45063800  | -4.81222900 |
| C | 6.09985700  | -3.31474400 | 1.63708300  |
| C | 6.19857400  | -2.78179100 | 3.07578100  |
| H | 5.74866800  | -3.47290900 | 3.79674500  |
| H | 7.25114200  | -2.65427200 | 3.35017200  |
| H | 5.70838700  | -1.80738900 | 3.18262900  |
| C | 6.83822500  | -4.66881000 | 1.56820200  |
| H | 6.36364300  | -5.40348300 | 2.22792000  |
| H | 6.83428300  | -5.07899900 | 0.55349200  |
| H | 7.88261700  | -4.55107200 | 1.88062200  |
| C | 6.79578400  | -2.30187400 | 0.70093100  |
| H | 6.79723200  | -2.64402900 | -0.33871900 |
| H | 6.29537100  | -1.32731100 | 0.73229600  |
| H | 7.83880400  | -2.15681800 | 1.00539500  |
| C | 2.84673200  | -4.66995000 | -2.02558600 |
| C | 3.76940900  | -5.87390800 | -2.31232200 |
| H | 3.58839200  | -6.68439200 | -1.59757000 |
| H | 3.57642900  | -6.25890300 | -3.32008900 |
| H | 4.83062800  | -5.60983900 | -2.26117300 |
| C | 1.39313400  | -5.12035700 | -2.25389500 |
| H | 0.67971200  | -4.30225000 | -2.13025100 |
| H | 1.29076800  | -5.50856700 | -3.27358100 |
| H | 1.11292800  | -5.92295400 | -1.56173400 |
| C | 3.16699400  | -3.53292900 | -3.02005100 |
| H | 2.50976600  | -2.67186200 | -2.86442900 |
| H | 4.20685100  | -3.19891300 | -2.91895800 |
| H | 3.02934200  | -3.88207800 | -4.05049500 |
| O | 0.37705500  | -1.41255000 | 0.90776100  |



|   |             |             |             |
|---|-------------|-------------|-------------|
| O | -2.11531900 | -1.36707100 | 0.58745300  |
| P | -0.74801300 | -1.58129200 | -0.25580100 |
| O | -0.79616200 | -2.83373700 | -1.03281400 |
| O | -0.47123000 | -0.29329500 | -1.13409000 |
| H | 3.19629800  | 0.25876500  | -3.72314600 |
| C | 2.58926800  | 0.94576700  | -3.12075700 |
| C | 2.17215400  | 1.18610200  | -0.52245400 |
| C | 2.65333000  | 0.49102000  | 0.62331800  |
| C | 2.22625000  | 0.80238700  | 1.91526200  |
| C | 1.27575900  | 1.80567200  | 2.05379100  |
| C | 0.76861600  | 2.49451500  | 0.93405800  |
| C | 1.21656100  | 2.20721800  | -0.35274800 |
| C | 2.79168300  | 0.57352800  | -1.67416500 |
| C | 3.58414400  | -0.44098000 | -1.19598900 |
| H | 2.59784600  | 0.25424100  | 2.77620700  |
| H | 0.91046100  | 2.05942900  | 3.04084300  |
| H | 0.01900400  | 3.26589900  | 1.08129200  |
| H | 0.83925400  | 2.75002500  | -1.21192200 |
| H | -0.11220600 | 0.48925400  | -0.66308900 |
| H | 4.19405300  | -1.14925600 | -1.73531700 |
| N | 3.53197900  | -0.47663500 | 0.18238600  |
| H | 3.82733500  | -1.27433100 | 0.73137600  |
| C | 1.12698100  | 0.65309700  | -3.47698800 |
| O | 0.22836800  | 1.46779100  | -3.42522800 |
| O | 0.96994400  | -0.63593700 | -3.81129000 |
| C | -0.37760000 | -1.10536100 | -4.03709700 |
| H | -0.49871000 | -1.28390800 | -5.10924900 |
| H | -0.48154000 | -2.03329400 | -3.47510800 |
| H | -1.09674400 | -0.36738700 | -3.68669200 |
| C | 2.98354300  | 2.38194000  | -3.45931700 |

|   |            |            |             |
|---|------------|------------|-------------|
| C | 3.87562900 | 3.08833100 | -2.64749700 |
| C | 2.50692600 | 2.99838400 | -4.62362900 |
| C | 4.27770000 | 4.38170300 | -2.98406900 |
| H | 4.25258500 | 2.62435800 | -1.74251600 |
| C | 2.90607500 | 4.28959100 | -4.96165200 |
| H | 1.80471200 | 2.47444700 | -5.26375900 |
| C | 3.79309800 | 4.98880300 | -4.14133000 |
| H | 4.96819700 | 4.91432900 | -2.33571500 |
| H | 2.51870900 | 4.75166400 | -5.86561800 |
| H | 4.10067000 | 5.99773800 | -4.40200600 |

**R-TS1**

|   |             |             |             |
|---|-------------|-------------|-------------|
| C | -1.62169300 | -0.53121200 | 1.92321600  |
| C | -2.46525600 | 0.57117500  | 1.69997600  |
| H | -0.27356700 | -1.95650500 | 1.03926700  |
| C | -0.93511500 | -1.11273500 | 0.86111500  |
| C | -2.61318000 | 1.09464500  | 0.40130100  |
| C | -1.99897000 | 0.40041800  | -0.65813400 |
| C | -1.13206700 | -0.67916900 | -0.45480600 |
| C | -3.35743700 | 2.35831500  | 0.12268000  |
| C | -3.00965900 | 3.57510300  | 0.75959600  |
| C | -4.36105300 | 2.36178800  | -0.85481700 |
| C | -1.80324500 | 3.65906900  | 1.67768600  |
| C | -3.76655700 | 4.72562200  | 0.47851600  |
| C | -5.05033900 | 3.52551100  | -1.23787800 |
| C | -1.29613100 | 5.09175600  | 1.86151200  |
| H | -1.00897100 | 3.01253900  | 1.28984600  |
| C | -3.48010300 | 6.06688000  | 1.13343800  |
| C | -4.76549200 | 4.67579800  | -0.49516400 |
| C | -2.45886100 | 5.99618000  | 2.27087000  |

|   |             |             |             |
|---|-------------|-------------|-------------|
| H | -0.50043800 | 5.10574900  | 2.61525600  |
| H | -3.10304600 | 6.75742600  | 0.36355100  |
| H | -5.32244900 | 5.58351500  | -0.71169100 |
| H | -2.93084900 | 5.58376400  | 3.17334900  |
| H | -4.42185500 | 6.50498500  | 1.48757300  |
| H | -2.11274100 | 7.00459400  | 2.52525800  |
| H | -0.85449900 | 5.46045500  | 0.92462800  |
| H | -2.05353600 | 3.26392600  | 2.66907600  |
| C | -3.26791000 | 1.03241000  | 2.89242400  |
| H | -2.61211700 | 1.49864000  | 3.64186200  |
| H | -4.00799900 | 1.78250000  | 2.60337600  |
| C | -3.96195000 | -0.18654800 | 3.53717300  |
| H | -4.70116300 | -0.56682000 | 2.82426000  |
| H | -4.51738100 | 0.14008900  | 4.42334900  |
| C | -2.95915400 | -1.31254800 | 3.90660900  |
| H | -3.32559800 | -2.26934600 | 3.52014100  |
| H | -2.88509700 | -1.42145600 | 4.99451500  |
| C | -1.54489600 | -1.05473600 | 3.33405500  |
| H | -0.94179700 | -1.96765000 | 3.37877900  |
| H | -1.03773000 | -0.31430900 | 3.96993400  |
| C | -0.41136400 | -1.32213400 | -1.58726600 |
| C | -1.10399400 | -1.96155700 | -2.61517200 |
| C | 0.99030000  | -1.25614400 | -1.63084000 |
| C | -0.42258200 | -2.52188800 | -3.70648200 |
| H | -2.18577200 | -1.99906100 | -2.56981700 |
| C | 1.70134100  | -1.80550700 | -2.69893500 |
| H | 1.50464500  | -0.74889300 | -0.82292800 |
| C | 0.97133300  | -2.42917400 | -3.72630100 |
| H | 1.51504300  | -2.85314500 | -4.56184600 |
| C | -5.91095500 | 3.59158800  | -2.44564400 |

|   |              |             |             |
|---|--------------|-------------|-------------|
| C | -5.89330500  | 4.76066500  | -3.21234000 |
| C | -6.65817000  | 2.49732200  | -2.91055200 |
| C | -6.57849600  | 4.85960300  | -4.42801700 |
| H | -5.29463400  | 5.59716600  | -2.87409000 |
| C | -7.29563300  | 2.53396700  | -4.14752400 |
| H | -6.69548500  | 1.60232400  | -2.31202500 |
| C | -7.25186800  | 3.72668400  | -4.88786200 |
| H | -7.74386900  | 3.75790000  | -5.85217900 |
| C | -7.96638000  | 1.29004600  | -4.74630500 |
| C | -7.96507400  | 0.09691100  | -3.77481200 |
| H | -8.46840800  | -0.75577200 | -4.24415200 |
| H | -6.94996400  | -0.22165300 | -3.51512200 |
| H | -8.50171200  | 0.33016000  | -2.84820400 |
| C | -7.17100400  | 0.87647100  | -6.00529000 |
| H | -7.61741200  | -0.01252300 | -6.46716800 |
| H | -7.16041700  | 1.67645800  | -6.75388500 |
| H | -6.13506300  | 0.64181000  | -5.73866000 |
| C | -9.42625700  | 1.60492800  | -5.13205000 |
| H | -10.00598300 | 1.89962600  | -4.25002200 |
| H | -9.49090800  | 2.41840200  | -5.86210200 |
| H | -9.90255800  | 0.72173900  | -5.57422100 |
| C | -6.56975200  | 6.19235700  | -5.18946200 |
| C | -5.12567800  | 6.71740800  | -5.32912000 |
| H | -4.48828200  | 5.98061600  | -5.82022800 |
| H | -5.11541900  | 7.63861900  | -5.92447100 |
| H | -4.67841900  | 6.95001900  | -4.35764500 |
| C | -7.40876200  | 7.21492900  | -4.39218100 |
| H | -8.44463000  | 6.87316300  | -4.28849900 |
| H | -7.00261700  | 7.35961900  | -3.38520700 |
| H | -7.41656300  | 8.18779900  | -4.89947100 |

|   |             |             |             |
|---|-------------|-------------|-------------|
| C | -7.17036700 | 6.06171500  | -6.59878700 |
| H | -8.22252900 | 5.75879600  | -6.56637400 |
| H | -7.12192600 | 7.02880700  | -7.11177600 |
| H | -6.61806100 | 5.33318400  | -7.20056900 |
| C | 3.23222600  | -1.73404100 | -2.79864000 |
| C | 3.86582100  | -1.03898100 | -1.58260900 |
| H | 3.63652900  | -1.56753100 | -0.65112400 |
| H | 4.95538900  | -1.01754200 | -1.69471500 |
| H | 3.52148800  | -0.00377300 | -1.48128300 |
| C | 3.80840000  | -3.16337700 | -2.89194300 |
| H | 3.53948600  | -3.74652000 | -2.00455800 |
| H | 3.43033800  | -3.69707100 | -3.76926800 |
| H | 4.90226100  | -3.13128300 | -2.96309300 |
| C | 3.62576200  | -0.94096200 | -4.06435800 |
| H | 3.21862000  | -1.39851300 | -4.97174800 |
| H | 3.25378300  | 0.08929600  | -4.00623100 |
| H | 4.71647000  | -0.89893400 | -4.16928700 |
| C | -1.22979300 | -3.19242200 | -4.82606000 |
| C | -0.32891500 | -3.75781100 | -5.93545800 |
| H | 0.36341100  | -4.51785400 | -5.55449400 |
| H | -0.94886000 | -4.22914800 | -6.70549500 |
| H | 0.25719500  | -2.96968200 | -6.42219300 |
| C | -2.05502100 | -4.35156700 | -4.22623800 |
| H | -2.75753600 | -3.99099400 | -3.46936900 |
| H | -2.63627400 | -4.84653300 | -5.01326600 |
| H | -1.40234900 | -5.09907200 | -3.76024700 |
| C | -2.19041800 | -2.15681200 | -5.45288400 |
| H | -2.90056200 | -1.76637400 | -4.71899000 |
| H | -1.63903900 | -1.31314900 | -5.88077500 |
| H | -2.76641200 | -2.62588500 | -6.26020300 |

|   |             |             |             |
|---|-------------|-------------|-------------|
| O | -2.23980200 | 0.82278100  | -1.96576400 |
| O | -4.68329900 | 1.15030100  | -1.44855400 |
| P | -3.73534500 | 0.49667200  | -2.60786500 |
| O | -4.09038600 | -0.93483800 | -2.74288800 |
| O | -3.73190000 | 1.38095800  | -3.87348700 |
| H | -2.85318400 | 2.10583500  | -4.18087500 |
| C | -1.45405500 | 3.93766500  | -3.75392500 |
| C | -1.93337400 | 3.01846200  | -4.80698800 |
| O | -0.35817900 | 3.89261100  | -3.20291100 |
| S | -0.62248200 | 1.95868000  | -5.38922400 |
| O | -1.08262200 | 1.06368600  | -6.47052500 |
| C | 0.76814700  | 2.95581000  | -5.97506100 |
| H | 0.40497600  | 3.50905400  | -6.84268100 |
| H | 1.06932300  | 3.62273800  | -5.16607000 |
| H | 1.56861000  | 2.27078500  | -6.26263900 |
| C | 0.06750600  | 1.04343900  | -4.01635200 |
| H | 0.78801800  | 0.34066100  | -4.43703500 |
| H | 0.51203300  | 1.75200900  | -3.32024700 |
| H | -0.74931600 | 0.50802800  | -3.53589700 |
| C | -2.65821800 | 3.60057900  | -5.99389100 |
| C | -2.16804900 | 4.74561600  | -6.64378900 |
| C | -3.79890400 | 2.96793100  | -6.50276300 |
| C | -2.79492900 | 5.24059600  | -7.78479200 |
| H | -1.30130900 | 5.26277100  | -6.23877600 |
| C | -4.42885700 | 3.46772600  | -7.64219400 |
| H | -4.19113800 | 2.09335500  | -5.99990000 |
| C | -3.92629400 | 4.59600600  | -8.29023400 |
| H | -2.40836100 | 6.13068300  | -8.27283500 |
| H | -5.31452300 | 2.96786700  | -8.02276600 |
| H | -4.41911600 | 4.98034800  | -9.17868500 |

|   |             |            |             |
|---|-------------|------------|-------------|
| O | -2.39895500 | 4.83317900 | -3.42999000 |
| C | -2.04882300 | 5.73886000 | -2.37071400 |
| H | -1.17680500 | 6.33490600 | -2.65235700 |
| H | -2.92454200 | 6.37170500 | -2.23568500 |
| H | -1.83846400 | 5.18467300 | -1.45530600 |

### S-TS1

|   |             |             |             |
|---|-------------|-------------|-------------|
| C | -1.93636300 | -1.20772700 | 1.33741200  |
| C | -2.81615900 | -0.12014300 | 1.20186000  |
| H | -0.38615200 | -2.37640300 | 0.40485600  |
| C | -1.07568300 | -1.54436700 | 0.28391200  |
| C | -2.79532600 | 0.64090700  | 0.00746100  |
| C | -2.01032700 | 0.18478000  | -1.05395000 |
| C | -1.11804100 | -0.88601000 | -0.94260000 |
| C | -3.57382200 | 1.90955800  | -0.13606200 |
| C | -3.38673600 | 2.99330600  | 0.74558200  |
| C | -4.49762800 | 2.05866700  | -1.18701000 |
| C | -2.25363100 | 3.09488000  | 1.74007000  |
| C | -4.19546500 | 4.13617100  | 0.62205200  |
| C | -5.35952300 | 3.16141500  | -1.29043000 |
| C | -2.65573900 | 3.69793900  | 3.11009800  |
| H | -1.51827400 | 3.75994000  | 1.26979100  |
| C | -3.95235100 | 5.27238500  | 1.58344900  |
| C | -5.19094900 | 4.18571700  | -0.34714500 |
| C | -3.81382600 | 4.71601000  | 3.01035700  |
| H | -2.93625000 | 2.89939000  | 3.80567700  |
| H | -3.02886700 | 5.80469700  | 1.30881200  |
| H | -5.83063300 | 5.06193500  | -0.41272800 |
| H | -4.75982500 | 4.22669700  | 3.27117200  |
| H | -4.76751400 | 6.00233900  | 1.52655600  |

|   |             |             |             |
|---|-------------|-------------|-------------|
| H | -3.67030200 | 5.53132000  | 3.72812300  |
| H | -1.76845600 | 4.17733900  | 3.53908900  |
| H | -1.75003700 | 2.13686700  | 1.87837500  |
| C | -3.81660900 | 0.21148900  | 2.29591700  |
| H | -3.47332200 | 1.07965500  | 2.86965500  |
| H | -4.76238200 | 0.51716000  | 1.83552000  |
| C | -4.03816200 | -0.94657200 | 3.27228800  |
| H | -4.58921500 | -1.75665700 | 2.77531500  |
| H | -4.65666700 | -0.60595000 | 4.11069700  |
| C | -2.68909200 | -1.47534800 | 3.76103700  |
| H | -2.81704700 | -2.22896400 | 4.54649200  |
| H | -2.11634100 | -0.64739900 | 4.20246900  |
| C | -1.91688200 | -2.07521400 | 2.58411300  |
| H | -2.35498100 | -3.05273500 | 2.33416100  |
| H | -0.87638600 | -2.27846700 | 2.86780400  |
| C | -0.23289600 | -1.24584300 | -2.08398700 |
| C | -0.76557300 | -1.77952700 | -3.26107600 |
| C | 1.13877800  | -0.99820700 | -1.99779500 |
| C | 0.06163200  | -2.09645000 | -4.34467600 |
| H | -1.83685000 | -1.92635900 | -3.32940700 |
| C | 1.98961200  | -1.25649900 | -3.07750000 |
| H | 1.53022900  | -0.56465500 | -1.08300600 |
| C | 1.43183000  | -1.82692300 | -4.22749400 |
| H | 2.07979300  | -2.05065600 | -5.06275800 |
| C | -6.45183200 | 3.26405100  | -2.29446800 |
| C | -6.25772500 | 2.97745800  | -3.65515300 |
| C | -7.71488600 | 3.68556400  | -1.86988600 |
| C | -7.29937100 | 3.09302800  | -4.57334200 |
| H | -5.28132700 | 2.66669800  | -3.98863300 |
| C | -8.78458200 | 3.82373600  | -2.76537300 |



|   |              |             |             |
|---|--------------|-------------|-------------|
| H | -7.86655700  | 3.88284600  | -0.81342400 |
| C | -8.55372500  | 3.52025600  | -4.10791600 |
| H | -9.36705100  | 3.60768600  | -4.81757700 |
| C | -10.15292900 | 4.28211900  | -2.24099300 |
| C | -10.00690700 | 5.66972200  | -1.57952500 |
| H | -9.64568400  | 6.40887700  | -2.30331900 |
| H | -10.97404100 | 6.01298100  | -1.19311600 |
| H | -9.30125800  | 5.64702700  | -0.74299900 |
| C | -10.66480100 | 3.26670800  | -1.19647900 |
| H | -11.64109600 | 3.57890500  | -0.80648100 |
| H | -10.77568200 | 2.27301700  | -1.64396400 |
| H | -9.97785300  | 3.17646300  | -0.34922200 |
| C | -11.20231000 | 4.39189700  | -3.35913500 |
| H | -10.90374000 | 5.11522700  | -4.12603800 |
| H | -11.37703900 | 3.42679300  | -3.84704400 |
| H | -12.15591200 | 4.72820000  | -2.93774400 |
| C | -7.11707300  | 2.75270400  | -6.05911400 |
| C | -8.06175600  | 1.58812300  | -6.42804900 |
| H | -7.95235400  | 1.32948600  | -7.48809200 |
| H | -7.82790700  | 0.69941500  | -5.83251000 |
| H | -9.11100000  | 1.84628800  | -6.25137400 |
| C | -5.67762100  | 2.32355900  | -6.38926500 |
| H | -4.96080400  | 3.12196500  | -6.16794600 |
| H | -5.36924500  | 1.43354300  | -5.83248600 |
| H | -5.60003500  | 2.09352600  | -7.45764500 |
| C | -7.46312000  | 3.98838400  | -6.91730400 |
| H | -7.34304200  | 3.75917800  | -7.98287600 |
| H | -8.49503700  | 4.31839500  | -6.76041400 |
| H | -6.80316100  | 4.82876500  | -6.67214200 |
| C | 3.47394700   | -0.87764900 | -2.98137900 |

|   |             |             |             |
|---|-------------|-------------|-------------|
| C | 4.23689900  | -1.16373200 | -4.28524200 |
| H | 3.82264500  | -0.59408400 | -5.12423100 |
| H | 5.28618700  | -0.87083000 | -4.16922600 |
| H | 4.21638100  | -2.22757500 | -4.54610400 |
| C | 3.59070400  | 0.63466000  | -2.68607500 |
| H | 4.64526200  | 0.93466500  | -2.65228500 |
| H | 3.08449400  | 1.22542400  | -3.45535500 |
| H | 3.14195400  | 0.89120000  | -1.72185600 |
| C | 4.13721000  | -1.67894900 | -1.84155200 |
| H | 3.64979800  | -1.48788900 | -0.87984500 |
| H | 4.07908700  | -2.75546500 | -2.03770500 |
| H | 5.19466400  | -1.40476000 | -1.74323300 |
| C | -0.55186500 | -2.69826600 | -5.61833000 |
| C | -1.35810300 | -3.96241700 | -5.24932300 |
| H | -0.71638900 | -4.70904000 | -4.76747600 |
| H | -2.18086200 | -3.73044500 | -4.56726200 |
| H | -1.78984000 | -4.41206500 | -6.15141800 |
| C | -1.49967900 | -1.66657600 | -6.26964400 |
| H | -0.94837600 | -0.77023100 | -6.57705800 |
| H | -1.96246600 | -2.09707300 | -7.16665300 |
| H | -2.29476100 | -1.35423000 | -5.58822900 |
| C | 0.51673800  | -3.09902500 | -6.64918300 |
| H | 1.08788300  | -2.23411300 | -7.00620000 |
| H | 1.22388500  | -3.83045600 | -6.24142000 |
| H | 0.03217500  | -3.55144800 | -7.52122000 |
| O | -2.04785000 | 0.87314800  | -2.25665700 |
| O | -4.59373000 | 1.04303200  | -2.13451400 |
| P | -3.37976400 | 0.82397200  | -3.20856400 |
| O | -3.63229600 | -0.41946800 | -3.96609900 |
| O | -3.12400000 | 2.15200900  | -3.99807300 |

|   |             |            |             |
|---|-------------|------------|-------------|
| H | -2.12799300 | 2.68275100 | -3.69101100 |
| C | -0.58252600 | 3.48043800 | -2.02824800 |
| C | -0.90546000 | 3.50352300 | -3.47811600 |
| O | -1.12341300 | 4.16858500 | -1.17260500 |
| S | -1.62116600 | 5.04177700 | -3.95049900 |
| O | -0.83952800 | 6.30213500 | -3.88904000 |
| C | -2.15755000 | 4.71521100 | -5.64196700 |
| H | -2.75786700 | 3.80371500 | -5.65096800 |
| H | -2.72832800 | 5.58776200 | -5.96501800 |
| H | -1.25603400 | 4.59675400 | -6.24366500 |
| C | -3.17288800 | 5.21240000 | -3.05066500 |
| H | -3.62169500 | 6.14709700 | -3.39270000 |
| H | -3.80204200 | 4.35085900 | -3.27048800 |
| H | -2.91510000 | 5.24111000 | -1.99353500 |
| C | 0.15753000  | 3.02785200 | -4.43703600 |
| C | 0.13494600  | 1.69954300 | -4.88278000 |
| C | 1.19887600  | 3.87085500 | -4.85944600 |
| C | 1.12640900  | 1.23164700 | -5.74379500 |
| H | -0.63602300 | 1.02279800 | -4.53589400 |
| C | 2.17831300  | 3.40344700 | -5.73519100 |
| H | 1.23977300  | 4.89399300 | -4.49805800 |
| C | 2.14332500  | 2.08131300 | -6.18060400 |
| H | 1.10314600  | 0.19670300 | -6.06343300 |
| H | 2.97389600  | 4.06935800 | -6.05747000 |
| H | 2.90953000  | 1.71233600 | -6.85682000 |
| O | 0.37184800  | 2.57739400 | -1.75925500 |
| C | 0.68734000  | 2.38878700 | -0.37203300 |
| H | 0.86260800  | 3.34956700 | 0.11647000  |
| H | -0.12685700 | 1.86175100 | 0.12782300  |
| H | 1.59018500  | 1.78014900 | -0.36451300 |

**R-TS2**

|   |             |             |            |
|---|-------------|-------------|------------|
| C | -0.27534600 | -3.55311400 | 3.84597100 |
| C | -1.19486600 | -2.52432800 | 3.57908600 |
| H | 1.62379000  | -4.40224500 | 3.41992500 |
| C | 0.93570200  | -3.60242500 | 3.16993100 |
| C | -0.85054900 | -1.51903500 | 2.66302300 |
| C | 0.36001600  | -1.63694000 | 1.94977000 |
| C | 1.27823200  | -2.68846400 | 2.15452100 |
| C | -1.75791000 | -0.36720600 | 2.37929500 |
| C | -2.17286300 | 0.52993300  | 3.39113600 |
| C | -2.19807200 | -0.15557500 | 1.06616400 |
| C | -1.59111200 | 0.42565300  | 4.79037600 |
| C | -3.08939000 | 1.54824500  | 3.07414700 |
| C | -3.11573700 | 0.84376200  | 0.73458600 |
| C | -1.73149000 | 1.72136100  | 5.59351600 |
| H | -0.54088900 | 0.12283200  | 4.72372100 |
| C | -3.54823900 | 2.57074800  | 4.10006800 |
| C | -3.56289200 | 1.67024500  | 1.76316900 |
| C | -3.18059300 | 2.20658200  | 5.54016100 |
| H | -1.41062500 | 1.54913200  | 6.62748600 |
| H | -3.08964900 | 3.53958100  | 3.85244900 |
| H | -4.27605400 | 2.45647900  | 1.52654600 |
| H | -3.84073900 | 1.40693200  | 5.90483600 |
| H | -4.63129500 | 2.72059700  | 4.00509000 |
| H | -3.33610800 | 3.07168900  | 6.19512000 |
| H | -1.07116400 | 2.49430700  | 5.17693400 |
| H | -2.09837200 | -0.37360700 | 5.34551000 |
| C | -2.55263600 | -2.67067800 | 4.21985100 |
| H | -2.48690500 | -2.50975900 | 5.30565800 |

|   |             |             |             |
|---|-------------|-------------|-------------|
| H | -3.25440600 | -1.92931100 | 3.83051200  |
| C | -3.07928300 | -4.09854800 | 3.96005600  |
| H | -3.25765800 | -4.19737000 | 2.88278600  |
| H | -4.05035000 | -4.22472700 | 4.45171600  |
| C | -2.08423600 | -5.19461900 | 4.42986100  |
| H | -1.93735400 | -5.92390300 | 3.62556700  |
| H | -2.49522500 | -5.74765400 | 5.28184600  |
| C | -0.70741800 | -4.61079800 | 4.82822700  |
| H | 0.03944300  | -5.40863300 | 4.89935900  |
| H | -0.78924000 | -4.16906000 | 5.83171100  |
| C | 2.47039200  | -2.93935700 | 1.29209600  |
| C | 3.06368300  | -4.21619200 | 1.27266700  |
| C | 2.98236800  | -1.97370800 | 0.41214900  |
| C | 4.10974700  | -4.53483700 | 0.40475000  |
| H | 2.67767200  | -4.98862300 | 1.92186700  |
| C | 3.95700800  | -2.28316800 | -0.53864600 |
| H | 2.58201500  | -0.97778700 | 0.44433500  |
| C | 4.51979000  | -3.56257100 | -0.51670900 |
| H | 5.28662000  | -3.81592000 | -1.24017600 |
| C | -3.58212900 | 1.02459600  | -0.67074400 |
| C | -2.88658100 | 1.87595300  | -1.53375100 |
| C | -4.72668200 | 0.35906000  | -1.12292500 |
| C | -3.32876000 | 2.08692100  | -2.84528200 |
| H | -1.98308400 | 2.34458600  | -1.16785000 |
| C | -5.19563500 | 0.53942500  | -2.42920100 |
| H | -5.24541200 | -0.29693100 | -0.43424800 |
| C | -4.48087800 | 1.40869000  | -3.26351300 |
| H | -4.83158400 | 1.55942200  | -4.27814800 |
| C | -6.42780900 | -0.19987400 | -2.97218300 |
| C | -7.38547500 | 0.79437600  | -3.66226600 |

|   |             |             |             |
|---|-------------|-------------|-------------|
| H | -8.27452700 | 0.26813600  | -4.02918200 |
| H | -7.71218600 | 1.57054000  | -2.96149200 |
| H | -6.91994800 | 1.29042500  | -4.51905500 |
| C | -7.21380200 | -0.91539200 | -1.86079900 |
| H | -8.10280300 | -1.39286200 | -2.28776700 |
| H | -6.61833200 | -1.69846800 | -1.38382800 |
| H | -7.54685700 | -0.21309900 | -1.08851300 |
| C | -5.95778600 | -1.25603000 | -3.99663100 |
| H | -5.40580500 | -0.78899700 | -4.81916800 |
| H | -5.30193900 | -1.99201400 | -3.52053100 |
| H | -6.81628300 | -1.79048500 | -4.42158700 |
| C | -2.62953500 | 3.07426400  | -3.79186200 |
| C | -1.24891700 | 3.49846400  | -3.26047900 |
| H | -0.60569600 | 2.63509400  | -3.06518300 |
| H | -0.75144800 | 4.13784200  | -3.99802100 |
| H | -1.32959600 | 4.07169800  | -2.33104300 |
| C | -3.52183000 | 4.33031600  | -3.91094200 |
| H | -4.50524700 | 4.08013800  | -4.32399100 |
| H | -3.67739700 | 4.79145500  | -2.92934800 |
| H | -3.05426200 | 5.07281300  | -4.56915700 |
| C | -2.43705200 | 2.46388300  | -5.19620600 |
| H | -3.38695100 | 2.17812100  | -5.65830700 |
| H | -1.96242800 | 3.19946800  | -5.85592400 |
| H | -1.79743300 | 1.57935100  | -5.16231000 |
| C | 4.30126700  | -1.29320500 | -1.66128300 |
| C | 3.83583300  | 0.14056900  | -1.34504000 |
| H | 4.26209400  | 0.50333000  | -0.40261300 |
| H | 4.17098500  | 0.81343600  | -2.14289100 |
| H | 2.74655000  | 0.22535300  | -1.28566100 |
| C | 5.81916600  | -1.25810800 | -1.92686900 |

|   |             |             |             |
|---|-------------|-------------|-------------|
| H | 6.36759700  | -0.94996900 | -1.02940100 |
| H | 6.20954100  | -2.23036400 | -2.24390200 |
| H | 6.04362700  | -0.54173100 | -2.72554500 |
| C | 3.55914000  | -1.77339300 | -2.93166300 |
| H | 3.88647000  | -2.77646000 | -3.22761700 |
| H | 2.47813900  | -1.81048600 | -2.76083900 |
| H | 3.75434200  | -1.09379700 | -3.77091500 |
| C | 4.81456300  | -5.90068900 | 0.43035400  |
| C | 4.80226500  | -6.54827500 | -0.97112500 |
| H | 5.28105300  | -5.91244300 | -1.72160800 |
| H | 5.34252600  | -7.50205900 | -0.95022200 |
| H | 3.77928700  | -6.74888400 | -1.30640900 |
| C | 6.27871000  | -5.68109900 | 0.87188400  |
| H | 6.31885200  | -5.22836700 | 1.86867500  |
| H | 6.81862500  | -6.63533700 | 0.90468400  |
| H | 6.80687900  | -5.01547800 | 0.18161600  |
| C | 4.15604300  | -6.88430600 | 1.41180200  |
| H | 4.18390900  | -6.51153700 | 2.44141100  |
| H | 3.11111200  | -7.08415600 | 1.14704400  |
| H | 4.69076400  | -7.84009100 | 1.39095000  |
| O | 0.59880100  | -0.65886000 | 0.99554500  |
| O | -1.72979300 | -0.98198000 | 0.05979200  |
| P | -0.15318700 | -0.81064900 | -0.46570300 |
| O | 0.13881300  | -2.12638800 | -1.12810900 |
| O | 0.05682900  | 0.49229300  | -1.18582200 |
| H | -1.03427700 | -2.83353100 | -2.52784800 |
| C | -1.64813800 | -3.49318300 | -3.13436300 |
| S | -0.40007300 | -5.27339900 | -1.63482300 |
| O | -0.63032100 | -6.74502500 | -1.87557500 |
| C | 1.36795200  | -4.90016200 | -1.66252300 |

|   |             |             |             |
|---|-------------|-------------|-------------|
| H | 1.71230300  | -5.06494500 | -2.68364000 |
| H | 1.48253100  | -3.85146100 | -1.38481300 |
| H | 1.87259000  | -5.56179100 | -0.95865000 |
| C | -0.78525100 | -4.86882900 | 0.09282000  |
| H | -0.18119900 | -5.50267000 | 0.74639400  |
| H | -0.55757000 | -3.81265600 | 0.23930000  |
| H | -1.84840200 | -5.06727200 | 0.24195700  |
| C | -1.15685900 | -1.36644800 | -5.60873400 |
| C | -0.21928500 | -0.58001900 | -4.88343600 |
| C | 1.02595100  | -0.23456300 | -5.40180900 |
| C | 1.32762600  | -0.68363900 | -6.68533400 |
| C | 0.40919200  | -1.44879600 | -7.42938100 |
| C | -0.83132500 | -1.79512600 | -6.90364700 |
| C | -2.27861500 | -1.57513800 | -4.73324200 |
| C | -2.00638700 | -0.84794300 | -3.56282800 |
| H | 1.73118800  | 0.35315400  | -4.82343900 |
| H | 2.29052700  | -0.43632600 | -7.12203500 |
| H | 0.67624300  | -1.76987700 | -8.43200900 |
| H | -1.53745400 | -2.38322000 | -7.48301700 |
| H | -3.21708800 | -2.05004600 | -4.97334700 |
| H | -2.60610900 | -0.72639300 | -2.67378100 |
| N | -0.79056300 | -0.27010000 | -3.65589500 |
| H | -0.32747800 | 0.16434700  | -2.83471300 |
| C | -0.90197800 | -4.02971900 | -4.30818100 |
| O | 0.30041500  | -3.89616400 | -4.42013200 |
| O | -1.65949900 | -4.68599400 | -5.20879700 |
| C | -0.91948300 | -5.30372500 | -6.27989000 |
| H | -1.67332900 | -5.72816100 | -6.94269600 |
| H | -0.31356300 | -4.55861300 | -6.79664500 |
| H | -0.27291300 | -6.08833100 | -5.87904900 |



|   |             |             |             |
|---|-------------|-------------|-------------|
| C | -2.97714600 | -3.82078300 | -2.66015900 |
| C | -3.85313600 | -4.72934300 | -3.29134800 |
| C | -3.38178900 | -3.21729600 | -1.44668600 |
| C | -5.08978500 | -5.01614400 | -2.72325700 |
| H | -3.55266300 | -5.20498300 | -4.21428200 |
| C | -4.61362800 | -3.52036900 | -0.88301900 |
| H | -2.71792000 | -2.51932400 | -0.94942800 |
| C | -5.47457800 | -4.41944500 | -1.51982200 |
| H | -5.75543100 | -5.71711900 | -3.21785100 |
| H | -4.90171800 | -3.05151200 | 0.05329900  |
| H | -6.44066900 | -4.65261100 | -1.08164100 |

**S-TS2**

|   |             |             |            |
|---|-------------|-------------|------------|
| C | 0.01270500  | -3.48562600 | 3.91013700 |
| C | -0.96586800 | -2.50096800 | 3.67791500 |
| H | 1.92623700  | -4.27321800 | 3.36876600 |
| C | 1.18968700  | -3.50023300 | 3.16834400 |
| C | -0.72226700 | -1.49661500 | 2.72387000 |
| C | 0.47147500  | -1.55863200 | 1.98072600 |
| C | 1.44227600  | -2.56374600 | 2.15239000 |
| C | -1.69416600 | -0.40195000 | 2.42009600 |
| C | -2.13049800 | 0.50445300  | 3.41614500 |
| C | -2.14369100 | -0.22753300 | 1.09917100 |
| C | -1.51619800 | 0.47161300  | 4.80552500 |
| C | -3.08731200 | 1.48133100  | 3.08935000 |
| C | -3.08115400 | 0.75165100  | 0.75712000 |
| C | -1.68232800 | 1.79270900  | 5.56099800 |
| H | -0.45800500 | 0.20084600  | 4.72663700 |
| C | -3.57915400 | 2.50684700  | 4.09732800 |
| C | -3.56097600 | 1.57069600  | 1.77694300 |

|   |             |             |             |
|---|-------------|-------------|-------------|
| C | -3.15183000 | 2.21411300  | 5.53725800  |
| H | -1.32172800 | 1.67514100  | 6.58954700  |
| H | -3.18782400 | 3.49258600  | 3.80567400  |
| H | -4.29044300 | 2.33751300  | 1.52641500  |
| H | -3.76408300 | 1.40144400  | 5.95307300  |
| H | -4.67160800 | 2.58832900  | 4.02924500  |
| H | -3.32523200 | 3.09614500  | 6.16451300  |
| H | -1.06854100 | 2.57404300  | 5.09222500  |
| H | -1.98454600 | -0.31793300 | 5.40572800  |
| C | -2.26290000 | -2.67088200 | 4.43025900  |
| H | -2.10866700 | -2.44201300 | 5.49458400  |
| H | -3.02236000 | -1.97563300 | 4.06473000  |
| C | -2.77387900 | -4.12330500 | 4.31331200  |
| H | -3.13086900 | -4.27760500 | 3.28952700  |
| H | -3.64567200 | -4.24606700 | 4.96519000  |
| C | -1.68650900 | -5.17817400 | 4.65547600  |
| H | -1.57622900 | -5.87887700 | 3.81935300  |
| H | -1.98993100 | -5.77818900 | 5.52039300  |
| C | -0.31069400 | -4.53597800 | 4.94196800  |
| H | 0.46943000  | -5.30410400 | 4.97424900  |
| H | -0.33671900 | -4.07560700 | 5.94028500  |
| C | 2.58566900  | -2.72474400 | 1.21467600  |
| C | 3.05931000  | -4.01171800 | 0.91039800  |
| C | 3.12765900  | -1.63582700 | 0.51737900  |
| C | 3.99848400  | -4.22675900 | -0.10197000 |
| H | 2.64317100  | -4.85879700 | 1.44002200  |
| C | 4.00989700  | -1.81787000 | -0.54688100 |
| H | 2.80020200  | -0.64269500 | 0.77196500  |
| C | 4.43618200  | -3.11808100 | -0.83593000 |
| H | 5.11655700  | -3.27569300 | -1.66657600 |

|   |             |             |             |
|---|-------------|-------------|-------------|
| C | -3.51306000 | 0.96022100  | -0.65571300 |
| C | -2.72102600 | 1.73591400  | -1.50786500 |
| C | -4.72212800 | 0.43202000  | -1.11959600 |
| C | -3.12873600 | 2.01167000  | -2.81781200 |
| H | -1.77582700 | 2.10319500  | -1.13278300 |
| C | -5.15480400 | 0.67417600  | -2.42867900 |
| H | -5.31605600 | -0.16713300 | -0.43934800 |
| C | -4.34567400 | 1.47036100  | -3.24895000 |
| H | -4.67272800 | 1.67056000  | -4.26332300 |
| C | -6.45094500 | 0.07904100  | -2.99680800 |
| C | -7.33247000 | 1.19823300  | -3.59074800 |
| H | -8.26125300 | 0.77689600  | -3.99348200 |
| H | -7.59477500 | 1.93405900  | -2.82266800 |
| H | -6.82864900 | 1.72852000  | -4.40419600 |
| C | -7.27671300 | -0.65219100 | -1.92592800 |
| H | -8.19557400 | -1.04772700 | -2.37260600 |
| H | -6.72899200 | -1.49586700 | -1.49452200 |
| H | -7.56252800 | 0.02025700  | -1.10970000 |
| C | -6.08367000 | -0.92939900 | -4.10745200 |
| H | -5.51913500 | -0.45089600 | -4.91362100 |
| H | -5.45951100 | -1.73393300 | -3.70388800 |
| H | -6.98657500 | -1.37722000 | -4.54032800 |
| C | -2.32203100 | 2.92993900  | -3.74823000 |
| C | -0.92016200 | 3.22865200  | -3.18750800 |
| H | -0.36000200 | 2.31383000  | -2.97315900 |
| H | -0.35257800 | 3.81930300  | -3.91521800 |
| H | -0.97081300 | 3.81087300  | -2.26113200 |
| C | -3.09253600 | 4.26231300  | -3.88654700 |
| H | -4.08534800 | 4.10404400  | -4.32196700 |
| H | -3.22661200 | 4.73772900  | -2.90850600 |

|   |             |             |             |
|---|-------------|-------------|-------------|
| H | -2.54384000 | 4.95729500  | -4.53395100 |
| C | -2.15866000 | 2.29967000  | -5.14746900 |
| H | -3.12216800 | 2.09805300  | -5.62579600 |
| H | -1.60764100 | 2.98703700  | -5.79996000 |
| H | -1.60418600 | 1.36028400  | -5.09738400 |
| C | 4.41026600  | -0.65459600 | -1.46447500 |
| C | 3.92269200  | 0.70552400  | -0.93512900 |
| H | 4.32705500  | 0.91930400  | 0.06082300  |
| H | 4.26168200  | 1.50048300  | -1.60897700 |
| H | 2.83009500  | 0.75490700  | -0.88787900 |
| C | 5.94111300  | -0.59825500 | -1.63554200 |
| H | 6.43373500  | -0.42976900 | -0.67132900 |
| H | 6.34348200  | -1.52402000 | -2.05986400 |
| H | 6.21833400  | 0.22227100  | -2.30780100 |
| C | 3.73434300  | -0.89462700 | -2.83469700 |
| H | 4.06526700  | -1.83600000 | -3.28780900 |
| H | 2.64683900  | -0.93564600 | -2.71527200 |
| H | 3.97677400  | -0.08138800 | -3.53038100 |
| C | 4.52656600  | -5.62237700 | -0.46585400 |
| C | 4.17651600  | -5.93911200 | -1.93674500 |
| H | 4.64138600  | -5.22613300 | -2.62478100 |
| H | 4.52715200  | -6.94234800 | -2.20719600 |
| H | 3.09510800  | -5.89658800 | -2.10347600 |
| C | 6.06093800  | -5.64284400 | -0.29176000 |
| H | 6.33558100  | -5.43172900 | 0.74756300  |
| H | 6.46478100  | -6.62640700 | -0.56083200 |
| H | 6.54796300  | -4.89392900 | -0.92389800 |
| C | 3.93378300  | -6.72872800 | 0.42176300  |
| H | 4.15336900  | -6.55753400 | 1.48121900  |
| H | 2.84784600  | -6.80882300 | 0.30555600  |

|   |             |             |             |
|---|-------------|-------------|-------------|
| H | 4.36557000  | -7.69633400 | 0.14397400  |
| O | 0.63401400  | -0.59927200 | 0.99471700  |
| O | -1.67774900 | -1.06159400 | 0.09708300  |
| P | -0.10474200 | -0.91987800 | -0.44550100 |
| O | 0.20782300  | -2.30516600 | -0.94142900 |
| O | 0.10490900  | 0.29065000  | -1.30949700 |
| H | -1.34475800 | -3.01217300 | -2.13422500 |
| C | -1.62120300 | -3.82980300 | -2.78876100 |
| S | -1.35523000 | -5.25801400 | -0.78073900 |
| O | -2.01512000 | -6.60713800 | -0.72993900 |
| C | 0.43440700  | -5.40287900 | -0.63119400 |
| H | 0.79956000  | -5.91927200 | -1.52047300 |
| H | 0.84034600  | -4.39063500 | -0.57138100 |
| H | 0.65338400  | -5.98446900 | 0.26667900  |
| C | -1.73633700 | -4.30795500 | 0.70849500  |
| H | -1.37148200 | -4.85717600 | 1.57870500  |
| H | -1.25107800 | -3.33847100 | 0.61204200  |
| H | -2.81951200 | -4.18997900 | 0.74074800  |
| C | -1.29326700 | -1.83709900 | -5.57505900 |
| C | -0.36000000 | -1.02725300 | -4.86091300 |
| C | 0.91096200  | -0.73490100 | -5.35950100 |
| C | 1.26019100  | -1.29841000 | -6.58157600 |
| C | 0.36464500  | -2.12470800 | -7.29363000 |
| C | -0.90584300 | -2.39548800 | -6.80571200 |
| C | -2.46778400 | -1.91739400 | -4.76339700 |
| C | -2.21610100 | -1.17133800 | -3.61353000 |
| H | 1.59966700  | -0.10712000 | -4.80394900 |
| H | 2.24423400  | -1.09947900 | -6.99646900 |
| H | 0.67830100  | -2.55185400 | -8.24177400 |
| H | -1.59007000 | -3.03180300 | -7.35959500 |

|   |             |             |             |
|---|-------------|-------------|-------------|
| H | -3.39068800 | -2.42413700 | -5.00290900 |
| H | -2.84588400 | -0.98054700 | -2.75673200 |
| N | -0.96315200 | -0.63756600 | -3.67845800 |
| H | -0.50895900 | -0.15125700 | -2.88847800 |
| C | -3.06812300 | -4.18335100 | -2.85784900 |
| O | -3.60096900 | -4.92772600 | -3.65414200 |
| O | -3.72950500 | -3.58494000 | -1.84043200 |
| C | -5.10376500 | -3.98176300 | -1.69137300 |
| H | -5.46831000 | -3.42891300 | -0.82632100 |
| H | -5.67784000 | -3.72160800 | -2.58269600 |
| H | -5.16350100 | -5.05959700 | -1.52136400 |
| C | -0.60914000 | -4.31743400 | -3.68090400 |
| C | 0.67518200  | -3.72693600 | -3.58768900 |
| C | -0.82936200 | -5.35156400 | -4.62250400 |
| C | 1.70050300  | -4.15079300 | -4.42248100 |
| H | 0.84236500  | -2.96181300 | -2.83770100 |
| C | 0.20811900  | -5.76863800 | -5.44256200 |
| H | -1.81174700 | -5.79907700 | -4.69484800 |
| C | 1.47086800  | -5.16942200 | -5.34851700 |
| H | 2.67629800  | -3.68218900 | -4.35064700 |
| H | 0.03715700  | -6.56127300 | -6.16476100 |
| H | 2.27445500  | -5.50032600 | -6.00053200 |

### R-TS3

|   |             |             |            |
|---|-------------|-------------|------------|
| C | 0.12507400  | -3.19717400 | 4.71378800 |
| C | -0.80967800 | -2.22868200 | 4.30371900 |
| H | 1.91791700  | -4.28269500 | 4.21083700 |
| C | 1.18101600  | -3.55669800 | 3.87679800 |
| C | -0.69042400 | -1.61966300 | 3.03952000 |
| C | 0.29061100  | -2.12831200 | 2.17018600 |

|   |             |             |            |
|---|-------------|-------------|------------|
| C | 1.26669900  | -3.04678100 | 2.57877700 |
| C | -1.47149300 | -0.41881500 | 2.61612200 |
| C | -1.44079000 | 0.76905900  | 3.38931200 |
| C | -2.12029300 | -0.41146200 | 1.37053000 |
| C | -0.59613000 | 0.86564000  | 4.64803900 |
| C | -2.15994000 | 1.88775100  | 2.93949200 |
| C | -2.74538500 | 0.73655100  | 0.84931400 |
| C | -0.32755400 | 2.30713800  | 5.08906000 |
| H | 0.34563100  | 0.32681600  | 4.49378500 |
| C | -2.21756600 | 3.18926000  | 3.72025100 |
| C | -2.79362200 | 1.84618800  | 1.69957500 |
| C | -1.64167000 | 3.08625300  | 5.13317500 |
| H | 0.16466100  | 2.30389900  | 6.06870300 |
| H | -1.65637100 | 3.95318400  | 3.16232000 |
| H | -3.33053400 | 2.73051400  | 1.36942700 |
| H | -2.34855000 | 2.56073300  | 5.79013000 |
| H | -3.25498600 | 3.54563800  | 3.75270100 |
| H | -1.49884900 | 4.08795600  | 5.55490300 |
| H | 0.35891000  | 2.79791400  | 4.38642500 |
| H | -1.09569900 | 0.35441600  | 5.47838500 |
| C | -1.97475100 | -2.00525100 | 5.23648500 |
| H | -1.64206100 | -1.51455700 | 6.16247600 |
| H | -2.72335300 | -1.35361300 | 4.77861100 |
| C | -2.59539000 | -3.37055000 | 5.60252600 |
| H | -3.03368800 | -3.79473000 | 4.69311200 |
| H | -3.41941600 | -3.21648600 | 6.30800700 |
| C | -1.54957300 | -4.35535900 | 6.19224400 |
| H | -1.61913300 | -5.31652600 | 5.67224000 |
| H | -1.76050100 | -4.55448200 | 7.24901700 |
| C | -0.10084600 | -3.82624700 | 6.06451600 |

|   |             |             |             |
|---|-------------|-------------|-------------|
| H | 0.61772400  | -4.63282100 | 6.24446600  |
| H | 0.06951400  | -3.07583900 | 6.85062200  |
| C | 2.35506600  | -3.39028900 | 1.62294600  |
| C | 2.04282200  | -4.04626300 | 0.42642200  |
| C | 3.65819500  | -2.93514700 | 1.83975600  |
| C | 3.00217600  | -4.22093800 | -0.57155900 |
| H | 1.02120100  | -4.36526400 | 0.27131100  |
| C | 4.64585400  | -3.06798600 | 0.84910500  |
| H | 3.88722200  | -2.43858200 | 2.77974700  |
| C | 4.29165200  | -3.70860300 | -0.34368000 |
| H | 5.03325300  | -3.80417700 | -1.12463600 |
| C | -3.24014900 | 0.84764200  | -0.54706800 |
| C | -3.19159000 | 2.09452700  | -1.18236900 |
| C | -3.71168000 | -0.25365800 | -1.27946300 |
| C | -3.60691200 | 2.26971400  | -2.50740200 |
| H | -2.79885900 | 2.94272000  | -0.63558900 |
| C | -4.06085600 | -0.13463800 | -2.62198800 |
| H | -3.77437600 | -1.21093600 | -0.79052200 |
| C | -4.01563300 | 1.13740500  | -3.21569700 |
| H | -4.30320900 | 1.23638700  | -4.25555100 |
| C | -4.43292000 | -1.36118700 | -3.46682200 |
| C | -4.51187600 | -2.64886400 | -2.62805000 |
| H | -4.79339400 | -3.48798700 | -3.27404500 |
| H | -3.55264200 | -2.89812000 | -2.16224800 |
| H | -5.26688600 | -2.56995800 | -1.83788500 |
| C | -3.33678700 | -1.55866000 | -4.53754100 |
| H | -3.56025300 | -2.43352800 | -5.16022700 |
| H | -3.25645900 | -0.68840000 | -5.19817600 |
| H | -2.36439000 | -1.71673700 | -4.05913900 |
| C | -5.79716400 | -1.14339200 | -4.15320400 |



|   |             |             |             |
|---|-------------|-------------|-------------|
| H | -6.58784600 | -0.99931200 | -3.40833600 |
| H | -5.79152400 | -0.26699800 | -4.80953500 |
| H | -6.05903700 | -2.01495000 | -4.76488000 |
| C | -3.65318800 | 3.68596700  | -3.10208200 |
| C | -2.32115200 | 4.42814400  | -2.86578700 |
| H | -1.48461500 | 3.89191900  | -3.32161000 |
| H | -2.36602900 | 5.43145400  | -3.30631400 |
| H | -2.10803200 | 4.55047400  | -1.79951500 |
| C | -4.79041700 | 4.46171400  | -2.39967200 |
| H | -5.75375200 | 3.96369100  | -2.55509900 |
| H | -4.61713100 | 4.52359500  | -1.32010000 |
| H | -4.86278300 | 5.48330600  | -2.79328700 |
| C | -3.93725400 | 3.68057200  | -4.61340500 |
| H | -4.91336000 | 3.24022900  | -4.84253100 |
| H | -3.94341600 | 4.70886500  | -4.99161400 |
| H | -3.17297100 | 3.12527400  | -5.16634100 |
| C | 6.04542300  | -2.47940100 | 1.08173800  |
| C | 6.71065900  | -3.21007700 | 2.26688100  |
| H | 6.81534400  | -4.27953000 | 2.05376300  |
| H | 7.70870800  | -2.79907200 | 2.46032200  |
| H | 6.12046700  | -3.10847700 | 3.18364200  |
| C | 6.94896700  | -2.61700800 | -0.15502200 |
| H | 7.10927400  | -3.66521700 | -0.42923000 |
| H | 6.52472000  | -2.09051200 | -1.01750800 |
| H | 7.92925000  | -2.17606800 | 0.05571800  |
| C | 5.92810200  | -0.97245300 | 1.40318400  |
| H | 5.46745300  | -0.43004700 | 0.57047400  |
| H | 5.33573600  | -0.79441200 | 2.30792400  |
| H | 6.92189600  | -0.54378400 | 1.57729700  |
| C | 2.62664700  | -4.85652800 | -1.91833400 |

|   |             |             |             |
|---|-------------|-------------|-------------|
| C | 3.80471100  | -5.65520300 | -2.50919100 |
| H | 4.14803700  | -6.42726000 | -1.81151900 |
| H | 3.48904700  | -6.14947000 | -3.43454000 |
| H | 4.66008700  | -5.01864600 | -2.75913800 |
| C | 1.41685100  | -5.80195400 | -1.78036900 |
| H | 0.50700600  | -5.26424900 | -1.50068200 |
| H | 1.22957400  | -6.29522500 | -2.74094900 |
| H | 1.60738000  | -6.58049100 | -1.03276600 |
| C | 2.24316300  | -3.71896900 | -2.89136300 |
| H | 1.38232900  | -3.16171200 | -2.50637400 |
| H | 3.08036200  | -3.02570600 | -3.03939300 |
| H | 1.96937300  | -4.12671100 | -3.87190400 |
| O | 0.34548900  | -1.66039300 | 0.87147400  |
| O | -2.15147700 | -1.59776600 | 0.65138500  |
| P | -0.84457700 | -2.09819800 | -0.20772400 |
| O | -0.97299200 | -3.55733800 | -0.44555900 |
| O | -0.53948800 | -1.14633400 | -1.37264400 |
| H | 1.76477500  | -1.02578900 | -3.01354800 |
| C | 2.07161200  | -0.01256000 | -2.73198100 |
| C | 1.33988700  | 1.43405500  | -0.56765200 |
| C | 1.81977600  | 1.34268000  | 0.75556400  |
| C | 1.54489600  | 2.28454200  | 1.73973900  |
| C | 0.75635700  | 3.37000000  | 1.36631900  |
| C | 0.25225000  | 3.47794100  | 0.06141200  |
| C | 0.52195400  | 2.51397200  | -0.90957400 |
| C | 1.72257600  | 0.17011000  | -1.25251800 |
| C | 2.52759000  | -0.51761800 | -0.29073200 |
| H | 1.91884200  | 2.17421600  | 2.75260500  |
| H | 0.51970700  | 4.13436400  | 2.09962300  |
| H | -0.37011300 | 4.32880300  | -0.19820600 |

|   |             |             |             |
|---|-------------|-------------|-------------|
| H | 0.09404200  | 2.59603100  | -1.89982400 |
| H | 0.62482900  | -0.48334000 | -1.19605700 |
| H | 3.01918300  | -1.47303100 | -0.39064200 |
| N | 2.55792600  | 0.15117400  | 0.85268900  |
| H | 2.93774700  | -0.23845500 | 1.70615900  |
| C | 3.58500700  | -0.00072300 | -2.94761600 |
| O | 4.42599300  | 0.18200800  | -2.08955100 |
| O | 3.88542300  | -0.29152900 | -4.22399300 |
| C | 5.28776700  | -0.36105400 | -4.53043800 |
| H | 5.76936700  | -1.14010400 | -3.93353400 |
| H | 5.34112800  | -0.60023600 | -5.59209200 |
| H | 5.77167700  | 0.59687000  | -4.32445100 |
| C | 1.32228500  | 0.94083900  | -3.64568500 |
| C | 0.00394300  | 0.63765500  | -4.00270600 |
| C | 1.89892700  | 2.13203900  | -4.09539000 |
| C | -0.71610400 | 1.50394600  | -4.82239000 |
| H | -0.46473400 | -0.25849100 | -3.60965200 |
| C | 1.17809100  | 2.99834900  | -4.91662500 |
| H | 2.91368600  | 2.38824700  | -3.80239800 |
| C | -0.12912400 | 2.68125400  | -5.28953800 |
| H | -1.73939100 | 1.25767400  | -5.08345300 |
| H | 1.63729800  | 3.91947000  | -5.26417200 |
| H | -0.69104500 | 3.35442900  | -5.93080600 |

### S-TS3

|   |             |             |            |
|---|-------------|-------------|------------|
| C | 0.02321300  | -3.38619600 | 4.52325000 |
| C | -0.88690400 | -2.37864900 | 4.15299200 |
| H | 1.80625300  | -4.47059000 | 3.98987600 |
| C | 1.09211600  | -3.70796300 | 3.68917400 |
| C | -0.72462700 | -1.68872200 | 2.93735800 |

|   |             |             |            |
|---|-------------|-------------|------------|
| C | 0.27255300  | -2.15059100 | 2.05608900 |
| C | 1.21846000  | -3.11631200 | 2.42855900 |
| C | -1.48414600 | -0.45740700 | 2.56387700 |
| C | -1.45472300 | 0.70147200  | 3.38073100 |
| C | -2.09978700 | -0.39106800 | 1.30540700 |
| C | -0.71264100 | 0.70093200  | 4.70605300 |
| C | -2.08951500 | 1.86953700  | 2.92610600 |
| C | -2.66815200 | 0.78938700  | 0.80202700 |
| C | -0.43452700 | 2.09848700  | 5.26588200 |
| H | 0.22078900  | 0.13668900  | 4.59994500 |
| C | -2.11328400 | 3.14862900  | 3.74420500 |
| C | -2.67209100 | 1.89290400  | 1.65827200 |
| C | -1.70216900 | 2.95009100  | 5.20368900 |
| H | -0.06831800 | 2.01089600  | 6.29570200 |
| H | -1.43136000 | 3.87560800  | 3.27825000 |
| H | -3.14157800 | 2.81158100  | 1.31577400 |
| H | -2.50623200 | 2.43976000  | 5.75191000 |
| H | -3.11273700 | 3.59724700  | 3.68490800 |
| H | -1.55270600 | 3.92208200  | 5.68836600 |
| H | 0.35855100  | 2.58694200  | 4.68689000 |
| H | -1.30117700 | 0.15875600  | 5.45436100 |
| C | -2.07772400 | -2.20395300 | 5.06334600 |
| H | -1.76971300 | -1.77781300 | 6.02894300 |
| H | -2.80635200 | -1.51676300 | 4.62531400 |
| C | -2.72195700 | -3.58334500 | 5.31926600 |
| H | -3.13319400 | -3.94259400 | 4.37010400 |
| H | -3.56775600 | -3.46673400 | 6.00592700 |
| C | -1.70529300 | -4.61585100 | 5.87717700 |
| H | -1.77106200 | -5.54267300 | 5.29770600 |
| H | -1.94916900 | -4.87583600 | 6.91347500 |

|   |             |             |             |
|---|-------------|-------------|-------------|
| C | -0.24738300 | -4.09917400 | 5.82304200  |
| H | 0.45637700  | -4.92552600 | 5.96892000  |
| H | -0.09013800 | -3.40413600 | 6.66107100  |
| C | 2.32812000  | -3.43645800 | 1.49101800  |
| C | 2.04466500  | -3.94553900 | 0.22309300  |
| C | 3.65259800  | -3.11626400 | 1.82907900  |
| C | 3.05332200  | -4.11709900 | -0.73317800 |
| H | 1.01341900  | -4.15927300 | -0.02412300 |
| C | 4.68604100  | -3.25566800 | 0.89464400  |
| H | 3.85285400  | -2.73939900 | 2.82752400  |
| C | 4.35982300  | -3.75766500 | -0.37705900 |
| H | 5.15252600  | -3.86324300 | -1.10827700 |
| C | -3.16525400 | 0.90746400  | -0.59007100 |
| C | -2.88766500 | 2.07600700  | -1.31199200 |
| C | -3.88119000 | -0.12300100 | -1.21174400 |
| C | -3.32013300 | 2.23936100  | -2.63044200 |
| H | -2.29886600 | 2.84702700  | -0.83204900 |
| C | -4.30097300 | -0.01034900 | -2.53774300 |
| H | -4.08762600 | -1.02018900 | -0.64889200 |
| C | -4.02089900 | 1.18072000  | -3.22089400 |
| H | -4.35577000 | 1.28461400  | -4.24814700 |
| C | -5.03277800 | -1.15043200 | -3.26021800 |
| C | -5.24361700 | -2.37434000 | -2.35302100 |
| H | -5.75526000 | -3.16387800 | -2.91478300 |
| H | -4.29248700 | -2.78131200 | -1.99337000 |
| H | -5.86341300 | -2.13100500 | -1.48300100 |
| C | -4.18951500 | -1.59984900 | -4.47352000 |
| H | -4.70197100 | -2.40104200 | -5.01968700 |
| H | -4.01343300 | -0.77575800 | -5.17313700 |
| H | -3.21723100 | -1.97956400 | -4.14244800 |

|   |             |             |             |
|---|-------------|-------------|-------------|
| C | -6.41192500 | -0.65587300 | -3.74490700 |
| H | -7.02664600 | -0.33139200 | -2.89790500 |
| H | -6.32112900 | 0.18921600  | -4.43520000 |
| H | -6.94505100 | -1.45966900 | -4.26692500 |
| C | -3.08494700 | 3.53467100  | -3.42193900 |
| C | -2.17633100 | 4.52086200  | -2.66898600 |
| H | -1.18951900 | 4.08469100  | -2.48328900 |
| H | -2.03438200 | 5.42437300  | -3.27243000 |
| H | -2.61095800 | 4.82861900  | -1.71138100 |
| C | -4.45133800 | 4.21280000  | -3.66349200 |
| H | -5.12456900 | 3.56133000  | -4.23046800 |
| H | -4.94102600 | 4.45211900  | -2.71271900 |
| H | -4.32429800 | 5.14408600  | -4.22921700 |
| C | -2.41625000 | 3.22486000  | -4.77785800 |
| H | -3.02536200 | 2.55064400  | -5.38875000 |
| H | -2.27807100 | 4.15126500  | -5.34884500 |
| H | -1.43794600 | 2.76408700  | -4.61989700 |
| C | 6.13439000  | -2.83939900 | 1.18973100  |
| C | 6.30620700  | -2.28655100 | 2.61387400  |
| H | 6.03048300  | -3.02623200 | 3.37292800  |
| H | 7.35316000  | -2.01186400 | 2.78015000  |
| H | 5.70200000  | -1.38622800 | 2.77874800  |
| C | 7.06447400  | -4.06094700 | 1.03005900  |
| H | 6.78672300  | -4.85343800 | 1.73334200  |
| H | 7.01349900  | -4.47796100 | 0.01967900  |
| H | 8.10544200  | -3.77763100 | 1.22559300  |
| C | 6.55756100  | -1.73672600 | 0.19207400  |
| H | 6.50632100  | -2.08708700 | -0.84366600 |
| H | 5.91047700  | -0.85561500 | 0.27942200  |
| H | 7.58847900  | -1.41884800 | 0.38677100  |

|   |             |             |             |
|---|-------------|-------------|-------------|
| C | 2.69480300  | -4.57506300 | -2.15460000 |
| C | 3.88345500  | -5.27007600 | -2.84394700 |
| H | 4.24500400  | -6.11999400 | -2.25400700 |
| H | 3.57230800  | -5.64588900 | -3.82448200 |
| H | 4.72505500  | -4.58945900 | -3.01362300 |
| C | 1.49753300  | -5.54794700 | -2.14088500 |
| H | 0.57897600  | -5.05985700 | -1.80541200 |
| H | 1.32201500  | -5.92259100 | -3.15576900 |
| H | 1.69646100  | -6.40882000 | -1.49224100 |
| C | 2.29861800  | -3.32330900 | -2.97127700 |
| H | 1.43786800  | -2.81215100 | -2.52946800 |
| H | 3.13868100  | -2.61909200 | -3.03126000 |
| H | 2.02908700  | -3.60300000 | -3.99651900 |
| O | 0.37152800  | -1.59109400 | 0.79968700  |
| O | -2.12764600 | -1.54329600 | 0.53504100  |
| P | -0.79987100 | -1.93015700 | -0.35571200 |
| O | -0.88671300 | -3.36982400 | -0.71466700 |
| O | -0.49236300 | -0.86169100 | -1.39781100 |
| H | 2.63709400  | -0.45943400 | -2.94944200 |
| C | 2.28931800  | 0.51056800  | -2.58884200 |
| C | 1.56595700  | 1.41913700  | -0.17884900 |
| C | 2.12682000  | 1.10845000  | 1.07206300  |
| C | 1.96037000  | 1.89741100  | 2.20398400  |
| C | 1.20049100  | 3.05508100  | 2.04656800  |
| C | 0.61529500  | 3.37699100  | 0.81321500  |
| C | 0.78052500  | 2.56255800  | -0.30635000 |
| C | 1.89565800  | 0.29887600  | -1.10656100 |
| C | 2.74564700  | -0.55742600 | -0.31327500 |
| H | 2.39387800  | 1.62730900  | 3.16169900  |
| H | 1.05201900  | 3.71354600  | 2.89539700  |

|   |             |             |             |
|---|-------------|-------------|-------------|
| H | 0.01453700  | 4.27767800  | 0.73057600  |
| H | 0.31340400  | 2.79597600  | -1.25385300 |
| H | 0.85968600  | -0.33213500 | -1.15886900 |
| H | 3.20432800  | -1.49581400 | -0.59333800 |
| N | 2.84611100  | -0.09528100 | 0.91863600  |
| H | 3.23673500  | -0.65383000 | 1.67121900  |
| C | 1.02212000  | 0.82195700  | -3.37610700 |
| O | 0.42048300  | 1.87967800  | -3.35284500 |
| O | 0.61992600  | -0.25869100 | -4.04411100 |
| C | -0.73596400 | -0.22425300 | -4.53777700 |
| H | -0.84267800 | 0.54292500  | -5.30761200 |
| H | -0.91080400 | -1.21589000 | -4.95240400 |
| H | -1.41445700 | -0.02853300 | -3.70711300 |
| C | 3.43031100  | 1.50552400  | -2.70732900 |
| C | 4.73517700  | 1.01414600  | -2.57138400 |
| C | 3.23839200  | 2.88173100  | -2.86507700 |
| C | 5.82974300  | 1.87607600  | -2.58628100 |
| H | 4.89496000  | -0.05589800 | -2.45259700 |
| C | 4.33557000  | 3.74445500  | -2.88717100 |
| H | 2.23371400  | 3.26899400  | -2.97885400 |
| C | 5.63126900  | 3.24883800  | -2.74423200 |
| H | 6.83434200  | 1.47561600  | -2.48201700 |
| H | 4.17292700  | 4.81113800  | -3.01442000 |
| H | 6.48094200  | 3.92554100  | -2.75878800 |

**R-pdt**

|   |            |             |             |
|---|------------|-------------|-------------|
| C | 1.82802100 | -1.53710900 | -0.13895100 |
| C | 0.73567800 | -0.54072200 | -0.50620200 |
| O | 1.91824000 | -2.15420200 | 0.90135000  |
| C | 1.20950300 | 0.83671700  | -0.03120400 |



|   |             |             |             |
|---|-------------|-------------|-------------|
| C | 1.07342800  | 1.20388300  | 1.31070300  |
| C | 1.81380100  | 1.72332400  | -0.92608600 |
| C | 1.52648000  | 2.44692000  | 1.74823400  |
| H | 0.60228100  | 0.51213100  | 2.00201300  |
| C | 2.26402200  | 2.97009500  | -0.49019200 |
| H | 1.93128300  | 1.43441500  | -1.96746900 |
| C | 2.12089800  | 3.33472300  | 0.84878300  |
| H | 1.41257500  | 2.72496400  | 2.79237100  |
| H | 2.72405100  | 3.65542300  | -1.19679300 |
| H | 2.46813100  | 4.30604500  | 1.18971900  |
| O | 2.75050000  | -1.60349900 | -1.12166400 |
| C | 3.89269100  | -2.42562800 | -0.83339900 |
| H | 4.53023400  | -2.35909500 | -1.71503400 |
| H | 3.58545000  | -3.45948200 | -0.65629500 |
| H | 4.41632100  | -2.05358800 | 0.05102000  |
| H | 0.69584000  | -0.50935900 | -1.60081300 |
| C | -1.83079200 | -0.19794800 | -0.31734500 |
| C | -2.90071200 | -0.83764800 | 0.36668900  |
| C | -4.22368900 | -0.40276800 | 0.25184400  |
| C | -4.46877300 | 0.69682300  | -0.56331900 |
| C | -3.42205200 | 1.34964800  | -1.24500400 |
| C | -2.10810900 | 0.91390800  | -1.12837000 |
| C | -0.62125700 | -0.90609700 | 0.02572000  |
| C | -0.98257100 | -1.91119400 | 0.88882300  |
| H | -5.03084900 | -0.90273500 | 0.78044200  |
| H | -5.48616300 | 1.06119300  | -0.67332300 |
| H | -3.64953500 | 2.21042500  | -1.86725100 |
| H | -1.30439100 | 1.43231300  | -1.64306700 |
| H | -0.36342000 | -2.64486000 | 1.37960700  |
| N | -2.35127800 | -1.87713600 | 1.09079500  |

H -2.86219200 -2.50780500 1.68746000

**S-pdt**

C -1.82818800 -1.53707300 -0.13873700  
C -0.73580700 -0.54078800 -0.50617100  
O -1.91828800 -2.15421600 0.90154200  
C -1.20940500 0.83672200 -0.03125800  
C -1.07251200 1.20425900 1.31049500  
C -1.81432700 1.72306000 -0.92595900  
C -1.52532600 2.44737100 1.74798300  
H -0.60090200 0.51268900 2.00166900  
C -2.26434100 2.96993600 -0.49010100  
H -1.93248900 1.43388400 -1.96719300  
C -2.12036500 3.33492400 0.84866600  
H -1.41078400 2.72571200 2.79196800  
H -2.72485800 3.65503900 -1.19660000  
H -2.46738400 4.30633400 1.18957200  
O -2.75091100 -1.60329700 -1.12123700  
C -3.89317500 -2.42517000 -0.83272800  
H -4.53121700 -2.35803300 -1.71395800  
H -3.58617900 -3.45922700 -0.65632700  
H -4.41618700 -2.05343800 0.05218700  
H -0.69610700 -0.50954700 -1.60080600  
C 1.83073300 -0.19794900 -0.31730800  
C 2.90072100 -0.83802500 0.36624200  
C 4.22367700 -0.40308500 0.25146000  
C 4.46866100 0.69694800 -0.56315100  
C 3.42186900 1.35012100 -1.24437100  
C 2.10793200 0.91430800 -1.12780600  
C 0.62120400 -0.90627200 0.02556000

|   |            |             |             |
|---|------------|-------------|-------------|
| C | 0.98260500 | -1.91183500 | 0.88804400  |
| H | 5.03091200 | -0.90332400 | 0.77968400  |
| H | 5.48604400 | 1.06136200  | -0.67307200 |
| H | 3.64926400 | 2.21121200  | -1.86621200 |
| H | 1.30414400 | 1.43295500  | -1.64214100 |
| H | 0.36356700 | -2.64574200 | 1.37861000  |
| N | 2.35139000 | -1.87797000 | 1.08980100  |
| H | 2.86230200 | -2.50869200 | 1.68641200  |

**S-Me-cat**

|   |             |             |             |
|---|-------------|-------------|-------------|
| C | -2.14847300 | -1.44669200 | 1.21227300  |
| C | -2.94782100 | -0.29066300 | 1.23285000  |
| H | -0.73150100 | -2.61590400 | 0.10034900  |
| C | -1.36193800 | -1.73109600 | 0.10180600  |
| C | -2.95717900 | 0.57260000  | 0.12034900  |
| C | -2.23107600 | 0.18703200  | -1.02326400 |
| C | -1.39894200 | -0.93845200 | -1.05309200 |
| C | -3.70433600 | 1.86665000  | 0.11527500  |
| C | -3.45571200 | 2.90400400  | 1.03581000  |
| C | -4.63178600 | 2.11134200  | -0.90533700 |
| C | -2.39552400 | 2.86282800  | 2.10951400  |
| C | -4.16374300 | 4.11583700  | 0.92855700  |
| C | -5.32605400 | 3.31580700  | -1.05458000 |
| C | -2.92148700 | 3.35585700  | 3.47836000  |
| H | -1.58057100 | 3.53039100  | 1.79291700  |
| C | -3.86146900 | 5.18497400  | 1.94839800  |
| C | -5.08909700 | 4.30528700  | -0.09332900 |
| C | -3.86213900 | 4.58396900  | 3.36556300  |
| H | -3.45595100 | 2.53904500  | 3.97286300  |
| H | -2.87341300 | 5.62404800  | 1.74299100  |

|   |             |             |             |
|---|-------------|-------------|-------------|
| H | -5.62524300 | 5.24767100  | -0.16636100 |
| H | -4.88897300 | 4.28381600  | 3.60306900  |
| H | -4.58721000 | 6.00206300  | 1.87524200  |
| H | -3.58301600 | 5.35170700  | 4.09537200  |
| H | -2.05921800 | 3.58890000  | 4.11294000  |
| H | -1.95056700 | 1.87142400  | 2.20337200  |
| C | -3.83202500 | -0.11937400 | 2.44592700  |
| H | -4.32483800 | 0.85457300  | 2.45167900  |
| H | -4.63910900 | -0.86196000 | 2.36070800  |
| C | -3.09412900 | -0.36413600 | 3.78566100  |
| H | -3.84325600 | -0.61969300 | 4.54344700  |
| H | -2.62549500 | 0.56616000  | 4.12024100  |
| C | -2.01489400 | -1.47167000 | 3.70009300  |
| H | -2.04433000 | -2.10542100 | 4.59326400  |
| H | -1.01920800 | -1.01393700 | 3.67185300  |
| C | -2.17115500 | -2.33079100 | 2.43357000  |
| H | -3.12362900 | -2.88027400 | 2.48205600  |
| H | -1.37826200 | -3.08422800 | 2.37562700  |
| C | -0.54354100 | -1.29203600 | -2.21540100 |
| C | -1.07084200 | -1.43548400 | -3.50386600 |
| C | 0.82256600  | -1.52375600 | -2.00861900 |
| C | -0.25136000 | -1.79216600 | -4.57697100 |
| H | -2.12923200 | -1.28232900 | -3.67751200 |
| C | 1.66391400  | -1.87803300 | -3.06724600 |
| H | 1.23763300  | -1.40247000 | -1.01094100 |
| C | 1.11134800  | -2.00777100 | -4.34479600 |
| H | 1.75716400  | -2.28169600 | -5.17745300 |
| C | -6.17962300 | 3.57773500  | -2.23933800 |
| C | -6.00771600 | 4.77475700  | -2.95443300 |
| C | -7.11899300 | 2.64658700  | -2.69735300 |

|   |             |             |             |
|---|-------------|-------------|-------------|
| C | -6.75497000 | 5.04641900  | -4.10245700 |
| H | -5.25717400 | 5.48604600  | -2.62051800 |
| C | -7.87723100 | 2.89190100  | -3.84762300 |
| H | -7.25178000 | 1.71458200  | -2.15855300 |
| C | -7.68207700 | 4.09091700  | -4.53812500 |
| H | -8.25977600 | 4.28432000  | -5.43964900 |
| O | -2.28660200 | 1.00288600  | -2.16574600 |
| O | -4.80433900 | 1.12064200  | -1.88050000 |
| P | -3.65588600 | 1.04785400  | -3.02661400 |
| O | -3.94533500 | -0.02598800 | -3.99469200 |
| O | -3.47700600 | 2.53600600  | -3.60849700 |
| H | -4.24358100 | 2.79790500  | -4.14759100 |
| C | -6.57738300 | 6.34473300  | -4.85210800 |
| H | -5.60204400 | 6.79621400  | -4.64465100 |
| H | -6.66164600 | 6.19756600  | -5.93423200 |
| H | -7.34500200 | 7.07479400  | -4.56399400 |
| C | -8.87735200 | 1.86819200  | -4.32790500 |
| H | -9.34430500 | 2.17615600  | -5.26828300 |
| H | -8.39964200 | 0.89486100  | -4.48932000 |
| H | -9.67547100 | 1.71758600  | -3.59071200 |
| C | -0.84293900 | -1.96292600 | -5.95575800 |
| H | -1.80387300 | -1.44583500 | -6.03488400 |
| H | -0.17385500 | -1.56986700 | -6.72960100 |
| H | -1.01659700 | -3.02257800 | -6.18558800 |
| C | 3.14371900  | -2.07689800 | -2.84096600 |
| H | 3.55883300  | -2.81505000 | -3.53547000 |
| H | 3.69844400  | -1.14113100 | -2.99107300 |
| H | 3.35043000  | -2.41683400 | -1.82060000 |

**Me-R-TS2**

|   |             |             |            |
|---|-------------|-------------|------------|
| C | 0.04156400  | -2.97797600 | 4.84293000 |
| C | -0.94511700 | -2.00021200 | 4.62877900 |
| H | 1.83481800  | -3.89469800 | 4.08935100 |
| C | 1.05763300  | -3.15663000 | 3.90885800 |
| C | -0.91297900 | -1.21876500 | 3.46286400 |
| C | 0.05341800  | -1.51528200 | 2.48181100 |
| C | 1.08036800  | -2.44095700 | 2.70348300 |
| C | -1.77710800 | -0.02065400 | 3.25763600 |
| C | -1.70099400 | 1.08324700  | 4.14099100 |
| C | -2.52401700 | 0.08296500  | 2.07351900 |
| C | -0.76248000 | 1.06765000  | 5.33316700 |
| C | -2.44504000 | 2.23755000  | 3.84782800 |
| C | -3.22831000 | 1.25326600  | 1.73573600 |
| C | -0.37052300 | 2.47321600  | 5.79366500 |
| H | 0.12867500  | 0.48179700  | 5.08944800 |
| C | -2.38141900 | 3.49012600  | 4.70602800 |
| C | -3.20092500 | 2.28815900  | 2.67740800 |
| C | -1.63275500 | 3.30350200  | 6.02774700 |
| H | 0.23124100  | 2.40542100  | 6.70745600 |
| H | -1.87618700 | 4.27309200  | 4.12181600 |
| H | -3.76874800 | 3.19126200  | 2.47142900 |
| H | -2.27395800 | 2.78222300  | 6.75233700 |
| H | -3.39856000 | 3.86062800  | 4.88779900 |
| H | -1.39394700 | 4.28183300  | 6.46065100 |
| H | 0.25666800  | 2.95176000  | 5.02948000 |
| H | -1.23926300 | 0.54951800  | 6.17555700 |
| C | -2.04192700 | -1.92868300 | 5.66132700 |
| H | -1.64588400 | -1.53884100 | 6.61034200 |
| H | -2.83658600 | -1.24809400 | 5.34449300 |
| C | -2.61064200 | -3.34308500 | 5.90643300 |

|   |             |             |             |
|---|-------------|-------------|-------------|
| H | -3.14353000 | -3.65194800 | 5.00091500  |
| H | -3.35463600 | -3.29846100 | 6.70971800  |
| C | -1.50535100 | -4.38191900 | 6.24360200  |
| H | -1.59890900 | -5.24373300 | 5.57436300  |
| H | -1.63214100 | -4.76230300 | 7.26353400  |
| C | -0.07948300 | -3.80076700 | 6.09953500  |
| H | 0.66380900  | -4.60505400 | 6.11244800  |
| H | 0.13215600  | -3.16659400 | 6.97342000  |
| C | 2.19351300  | -2.63044000 | 1.73842600  |
| C | 1.95790900  | -3.00715500 | 0.40943300  |
| C | 3.51133100  | -2.45948500 | 2.17818900  |
| C | 3.02190600  | -3.21874300 | -0.46966700 |
| H | 0.93583600  | -3.15122800 | 0.07365100  |
| C | 4.59317600  | -2.64632300 | 1.30941000  |
| H | 3.69311900  | -2.16324900 | 3.20886100  |
| C | 4.33112000  | -3.02911000 | -0.00784900 |
| H | 5.16395100  | -3.18857000 | -0.69061200 |
| C | -3.89190000 | 1.46678000  | 0.42536100  |
| C | -3.89118400 | 2.75360100  | -0.13616800 |
| C | -4.51382900 | 0.43193200  | -0.28805400 |
| C | -4.50640000 | 3.02160800  | -1.36142400 |
| H | -3.38708100 | 3.56346200  | 0.38392700  |
| C | -5.10957400 | 0.66560900  | -1.52867800 |
| H | -4.51617100 | -0.56983200 | 0.12308100  |
| C | -5.10108700 | 1.96357400  | -2.05418400 |
| H | -5.57387600 | 2.15286400  | -3.01644300 |
| C | -5.77218800 | -0.46708900 | -2.27579100 |
| C | -4.53678000 | 4.43122300  | -1.90337300 |
| C | 6.00676200  | -2.40064400 | 1.78061700  |
| C | 2.77101000  | -3.65109100 | -1.89424400 |

|   |             |             |             |
|---|-------------|-------------|-------------|
| O | 0.04146200  | -0.78780300 | 1.30347000  |
| O | -2.48363000 | -0.99313800 | 1.20157100  |
| P | -1.18266400 | -1.04878100 | 0.16819300  |
| O | -1.10276600 | -2.41179700 | -0.42740200 |
| O | -1.14392800 | 0.20529200  | -0.66673300 |
| H | 0.35151000  | 1.19863800  | -1.06015300 |
| C | 2.41601600  | 1.93969700  | -1.23844400 |
| C | 0.97496100  | 1.88381600  | -1.63407900 |
| O | 3.26257700  | 2.68888600  | -1.68794900 |
| S | 1.46472300  | 0.04696200  | -3.17239500 |
| O | 2.84178100  | -0.54439100 | -3.15948900 |
| C | 0.18763300  | -1.23146200 | -3.09504300 |
| H | 0.28533700  | -1.77655600 | -2.15492400 |
| H | -0.78362700 | -0.73432600 | -3.09102600 |
| H | 0.31845600  | -1.89299700 | -3.95555300 |
| C | 1.13963400  | 0.74617000  | -4.81738700 |
| H | 1.31261700  | -0.04151800 | -5.55459400 |
| H | 0.11446200  | 1.11768100  | -4.86159400 |
| H | 1.84280900  | 1.56785800  | -4.96290900 |
| C | 0.29492400  | 2.79324600  | -2.52535900 |
| C | 0.95196100  | 3.81076800  | -3.25000900 |
| C | -1.09056200 | 2.57639200  | -2.72042200 |
| C | 0.23568400  | 4.58153600  | -4.15860900 |
| H | 2.01060500  | 3.97020200  | -3.08407200 |
| C | -1.78766300 | 3.34191000  | -3.64662000 |
| H | -1.58775600 | 1.80065300  | -2.14316900 |
| C | -1.12734600 | 4.34296000  | -4.36758000 |
| H | 0.73959700  | 5.36727800  | -4.71367900 |
| H | -2.84593000 | 3.15959500  | -3.79766800 |
| H | -1.67624000 | 4.94196600  | -5.08887500 |



|   |             |             |             |
|---|-------------|-------------|-------------|
| O | 2.63372500  | 0.95109300  | -0.36940200 |
| C | 3.99918200  | 0.73130500  | 0.03560400  |
| H | 4.40535700  | 1.64350700  | 0.47406600  |
| H | 3.94508400  | -0.07025900 | 0.76778000  |
| H | 4.58297900  | 0.42561000  | -0.83495600 |
| C | 2.06029700  | 3.46874100  | 1.57974800  |
| C | 1.57319200  | 2.25097300  | 2.14379800  |
| C | 2.31633800  | 1.49463500  | 3.05379600  |
| C | 3.56092900  | 1.99097200  | 3.42315400  |
| C | 4.05821400  | 3.20376200  | 2.89481500  |
| C | 3.32586600  | 3.94150200  | 1.97499400  |
| C | 1.06663200  | 3.90947700  | 0.64767100  |
| C | 0.03348400  | 2.97961500  | 0.68848000  |
| H | 1.94056800  | 0.55034100  | 3.43480800  |
| H | 4.16803800  | 1.43120000  | 4.12884700  |
| H | 5.03548400  | 3.55712800  | 3.21074600  |
| H | 3.72291800  | 4.86355700  | 1.56012500  |
| H | 1.09472700  | 4.79875000  | 0.03411400  |
| H | -0.91037500 | 2.95439700  | 0.16626700  |
| N | 0.32964700  | 2.00999900  | 1.60478600  |
| H | -0.12150400 | 1.10033800  | 1.62815800  |
| H | -3.54407600 | 4.89460500  | -1.87626500 |
| H | -5.88916100 | -0.23133200 | -3.33877900 |
| H | 2.98823600  | -2.83443200 | -2.59193100 |
| H | 6.13584300  | -2.68849700 | 2.82968700  |
| H | -6.77227100 | -0.67698100 | -1.87446300 |
| H | -5.18936300 | -1.39040700 | -2.19166400 |
| H | -4.89201100 | 4.45531800  | -2.93898800 |
| H | -5.20840500 | 5.06651500  | -1.31217000 |
| H | 6.73145800  | -2.96226600 | 1.18216800  |

|   |            |             |             |
|---|------------|-------------|-------------|
| H | 6.27398900 | -1.33772800 | 1.70243700  |
| H | 3.40645800 | -4.50148400 | -2.16900700 |
| H | 1.72760700 | -3.95141100 | -2.03359600 |

**Me-S-TS2**

|   |             |             |            |
|---|-------------|-------------|------------|
| C | 0.10756800  | -3.12939400 | 4.47378000 |
| C | -0.82865300 | -2.11356000 | 4.20931200 |
| H | 1.84473000  | -4.18257800 | 3.77399300 |
| C | 1.11169000  | -3.41124300 | 3.55250800 |
| C | -0.76001600 | -1.39668900 | 3.00467600 |
| C | 0.20593600  | -1.77913200 | 2.05369200 |
| C | 1.18446900  | -2.74778100 | 2.31905500 |
| C | -1.61525400 | -0.20734400 | 2.71139500 |
| C | -1.54329500 | 0.97041600  | 3.49460500 |
| C | -2.36103600 | -0.19387600 | 1.52682400 |
| C | -0.57614100 | 1.05576600  | 4.66071600 |
| C | -2.28502100 | 2.09792200  | 3.10200800 |
| C | -3.09019300 | 0.92922300  | 1.10557000 |
| C | -0.18190600 | 2.49533300  | 4.99856000 |
| H | 0.31485300  | 0.46244500  | 4.43275600 |
| C | -2.18948800 | 3.42513900  | 3.83543600 |
| C | -3.05560700 | 2.05006500  | 1.93561700 |
| C | -1.44074900 | 3.34634300  | 5.16745600 |
| H | 0.42541900  | 2.50421500  | 5.91098800 |
| H | -1.66145500 | 4.13343900  | 3.17968700 |
| H | -3.61299200 | 2.93563700  | 1.63744300 |
| H | -2.08389600 | 2.89095100  | 5.93370200 |
| H | -3.19627900 | 3.83798900  | 3.98028700 |
| H | -1.19658600 | 4.35667200  | 5.51587300 |
| H | 0.43999800  | 2.90717700  | 4.19288800 |

|   |             |             |             |
|---|-------------|-------------|-------------|
| H | -1.02511200 | 0.59748000  | 5.55225700  |
| C | -1.91158300 | -1.92447900 | 5.24133600  |
| H | -1.48432000 | -1.49673300 | 6.16018500  |
| H | -2.67233700 | -1.22294600 | 4.88922500  |
| C | -2.55485000 | -3.28707900 | 5.57894100  |
| H | -3.12775400 | -3.61365200 | 4.70447400  |
| H | -3.27506200 | -3.15261200 | 6.39381600  |
| C | -1.50570600 | -4.37128500 | 5.95090000  |
| H | -1.65241100 | -5.25297900 | 5.31796200  |
| H | -1.64431600 | -4.70276600 | 6.98622500  |
| C | -0.05193100 | -3.87703600 | 5.77254100  |
| H | 0.64656900  | -4.71897700 | 5.82598700  |
| H | 0.19917500  | -3.21005200 | 6.61080400  |
| C | 2.30945900  | -2.98822100 | 1.37943800  |
| C | 2.10228200  | -3.16397000 | 0.00584300  |
| C | 3.62280600  | -2.98880100 | 1.87459800  |
| C | 3.18273300  | -3.30882300 | -0.86969300 |
| H | 1.09405800  | -3.17398700 | -0.39380700 |
| C | 4.71780100  | -3.15665400 | 1.02284000  |
| H | 3.79011500  | -2.82878000 | 2.93720600  |
| C | 4.48091000  | -3.31085200 | -0.34838400 |
| H | 5.32660900  | -3.41784700 | -1.02541400 |
| C | -3.74566000 | 0.95870300  | -0.22457200 |
| C | -3.53146700 | 2.04712800  | -1.08071700 |
| C | -4.52373300 | -0.11271500 | -0.67830400 |
| C | -4.06779600 | 2.06851200  | -2.37057900 |
| H | -2.88815200 | 2.85858900  | -0.75383400 |
| C | -5.07374300 | -0.11687300 | -1.96226600 |
| H | -4.67994000 | -0.96628500 | -0.02764100 |
| C | -4.83623300 | 0.97964100  | -2.79756300 |

|   |             |             |             |
|---|-------------|-------------|-------------|
| H | -5.25465200 | 0.98383500  | -3.80235800 |
| C | -5.90139700 | -1.28912700 | -2.43095800 |
| C | -3.78227900 | 3.22022400  | -3.30579300 |
| C | 6.12447800  | -3.17373700 | 1.57191700  |
| C | 2.93190100  | -3.39663800 | -2.35545300 |
| O | 0.26630100  | -1.07941200 | 0.86371700  |
| O | -2.25177600 | -1.28663900 | 0.68143600  |
| P | -0.92897200 | -1.20651000 | -0.31997300 |
| O | -0.85485400 | -2.46442700 | -1.11271500 |
| O | -0.84436400 | 0.15099000  | -0.96711800 |
| H | 0.13245400  | 1.65213600  | -1.34635200 |
| C | 0.86492900  | 2.13234600  | -1.98790300 |
| S | 0.36008900  | 0.75241200  | -3.69692500 |
| O | 1.48297800  | -0.21408700 | -3.84344200 |
| C | -1.24603700 | -0.09585100 | -3.72986200 |
| H | -1.12460400 | -0.99688800 | -3.12559100 |
| H | -2.00049900 | 0.54654800  | -3.27274700 |
| H | -1.46674200 | -0.32609100 | -4.77612700 |
| C | 0.24876300  | 1.77638800  | -5.18994300 |
| H | 0.23632800  | 1.10441300  | -6.05133000 |
| H | -0.66498700 | 2.37451900  | -5.14418500 |
| H | 1.12101300  | 2.43009800  | -5.21052300 |
| C | 2.58224100  | 3.07830100  | 1.57051600  |
| C | 2.08475100  | 1.75654800  | 1.78292100  |
| C | 2.87702300  | 0.72910000  | 2.30630500  |
| C | 4.19918600  | 1.03177300  | 2.59772500  |
| C | 4.72056100  | 2.32767600  | 2.38497200  |
| C | 3.92692400  | 3.34917200  | 1.88267800  |
| C | 1.49382300  | 3.84339600  | 1.03174900  |
| C | 0.41450400  | 2.99065600  | 0.92893200  |

|   |             |             |             |
|---|-------------|-------------|-------------|
| H | 2.47956800  | -0.26908700 | 2.44824800  |
| H | 4.84708300  | 0.25246300  | 2.98943600  |
| H | 5.76158400  | 2.52590400  | 2.62511800  |
| H | 4.33791700  | 4.34318100  | 1.72649800  |
| H | 1.50489400  | 4.89275800  | 0.76986400  |
| H | -0.58915600 | 3.16653900  | 0.57564300  |
| N | 0.76575300  | 1.74411200  | 1.38806300  |
| H | 0.22513200  | 0.89899400  | 1.24091100  |
| C | 0.47666900  | 3.48308600  | -2.50752500 |
| O | 1.05979900  | 4.11399100  | -3.36939000 |
| O | -0.64903700 | 3.91780200  | -1.91317500 |
| C | -1.05397100 | 5.25383900  | -2.26441600 |
| H | -1.25585600 | 5.32392600  | -3.33532400 |
| H | -1.95849400 | 5.44084600  | -1.68808800 |
| H | -0.26745500 | 5.96344900  | -1.99746400 |
| C | 2.24719300  | 1.79176500  | -1.74959300 |
| C | 2.49965200  | 0.58354900  | -1.06162300 |
| C | 3.33593900  | 2.60313400  | -2.14666700 |
| C | 3.80060500  | 0.20629400  | -0.75587300 |
| H | 1.66819100  | -0.03753400 | -0.76036300 |
| C | 4.62749000  | 2.22593800  | -1.81924000 |
| H | 3.15082800  | 3.52659700  | -2.67973800 |
| C | 4.86129600  | 1.03165600  | -1.12257000 |
| H | 3.97737400  | -0.71459600 | -0.21544800 |
| H | 5.46151800  | 2.86291500  | -2.09823400 |
| H | 5.87752700  | 0.75004300  | -0.86233600 |
| H | -5.35878700 | -2.23203200 | -2.29784800 |
| H | -2.73141700 | 3.22329000  | -3.62644400 |
| H | 2.65614700  | -2.41427900 | -2.75961400 |
| H | 6.20955800  | -2.55427600 | 2.47142300  |

|   |             |             |             |
|---|-------------|-------------|-------------|
| H | -6.16506400 | -1.19556100 | -3.48926200 |
| H | -6.83533500 | -1.37096000 | -1.86107600 |
| H | -4.40401400 | 3.16891800  | -4.20507100 |
| H | -3.96833100 | 4.18742500  | -2.82495700 |
| H | 2.10033100  | -4.07409200 | -2.57621400 |
| H | 3.81851000  | -3.74742400 | -2.89406000 |
| H | 6.84595500  | -2.80350800 | 0.83560500  |
| H | 6.43433400  | -4.19075700 | 1.84700200  |

### **S-Cy-cat**

|   |             |             |             |
|---|-------------|-------------|-------------|
| C | -2.27105800 | -1.48945000 | 1.32870400  |
| C | -3.03549600 | -0.31332700 | 1.42078200  |
| H | -0.95205100 | -2.66936800 | 0.11176300  |
| C | -1.55604400 | -1.76811300 | 0.16960600  |
| C | -3.08326000 | 0.57913200  | 0.33165500  |
| C | -2.43356100 | 0.20039300  | -0.86062600 |
| C | -1.63770200 | -0.94736200 | -0.96251600 |
| C | -3.79766200 | 1.89064000  | 0.40189000  |
| C | -3.48749200 | 2.89456100  | 1.34122000  |
| C | -4.76138400 | 2.18818600  | -0.56931200 |
| C | -2.38037100 | 2.80213400  | 2.36319000  |
| C | -4.17442900 | 4.12310600  | 1.30094400  |
| C | -5.42260200 | 3.41825200  | -0.66508000 |
| C | -2.83026400 | 3.26388900  | 3.76988800  |
| H | -1.56904100 | 3.46476600  | 2.02747200  |
| C | -3.81142100 | 5.15170900  | 2.34276200  |
| C | -5.12866000 | 4.36949500  | 0.31812800  |
| C | -3.76472200 | 4.50086600  | 3.73663400  |
| H | -3.34488600 | 2.43938000  | 4.27249700  |
| H | -2.82525400 | 5.58244500  | 2.11181700  |

|   |             |             |             |
|---|-------------|-------------|-------------|
| H | -5.63514500 | 5.33061300  | 0.28886200  |
| H | -4.78457500 | 4.19878200  | 4.00050700  |
| H | -4.52576500 | 5.98187100  | 2.32762600  |
| H | -3.45302800 | 5.23938600  | 4.48323000  |
| H | -1.93380200 | 3.47531500  | 4.36336600  |
| H | -1.94965800 | 1.80099700  | 2.40617700  |
| C | -3.84837600 | -0.15314700 | 2.68451700  |
| H | -4.31625900 | 0.83120500  | 2.74206300  |
| H | -4.67699900 | -0.87417500 | 2.62448000  |
| C | -3.04609800 | -0.45122700 | 3.97563500  |
| H | -3.76005100 | -0.70647800 | 4.76676100  |
| H | -2.53454700 | 0.45743700  | 4.30661400  |
| C | -2.00407100 | -1.58416600 | 3.80417600  |
| H | -2.00308400 | -2.24033900 | 4.68149100  |
| H | -0.99904100 | -1.15224400 | 3.73311600  |
| C | -2.25257300 | -2.40443500 | 2.52705600  |
| H | -3.21625500 | -2.92915500 | 2.61372400  |
| H | -1.48571300 | -3.17719500 | 2.40668700  |
| C | -0.86791000 | -1.29563800 | -2.18422300 |
| C | -1.48113500 | -1.38793800 | -3.43786200 |
| C | 0.50254700  | -1.56776400 | -2.07782200 |
| C | -0.74429400 | -1.71970400 | -4.57678600 |
| H | -2.54456000 | -1.20739100 | -3.53663000 |
| C | 1.26229500  | -1.91102800 | -3.19937100 |
| H | 0.98765600  | -1.48837500 | -1.10783900 |
| C | 0.62404000  | -1.97758800 | -4.44295100 |
| H | 1.20569900  | -2.23298200 | -5.32493000 |
| C | -6.23734700 | 3.74202200  | -1.86105800 |
| C | -5.98979100 | 4.94100200  | -2.54673200 |
| C | -7.13770300 | 2.82473900  | -2.41799900 |

|   |             |            |             |
|---|-------------|------------|-------------|
| C | -6.58835500 | 5.20950100 | -3.78053700 |
| H | -5.26953300 | 5.64529900 | -2.13951500 |
| C | -7.73564200 | 3.05482900 | -3.66026400 |
| H | -7.33965000 | 1.89382800 | -1.90082700 |
| C | -7.44482500 | 4.24761000 | -4.33209200 |
| H | -7.88133600 | 4.42709900 | -5.30985600 |
| O | -2.52590600 | 1.03904800 | -1.98499300 |
| O | -5.00737200 | 1.22300200 | -1.55322000 |
| P | -3.93692400 | 1.14620700 | -2.76952600 |
| O | -4.32624700 | 0.10323200 | -3.73885900 |
| O | -3.73615800 | 2.63340700 | -3.34193100 |
| H | -4.51727700 | 2.92972000 | -3.84227400 |
| C | -6.25035100 | 6.47868400 | -4.53578300 |
| C | -5.41983200 | 6.17545200 | -5.80145600 |
| C | -7.49815600 | 7.30857900 | -4.89790900 |
| H | -5.62475700 | 7.09937300 | -3.87774600 |
| C | -5.04950900 | 7.45609800 | -6.55929300 |
| H | -6.00244300 | 5.51603500 | -6.46030000 |
| H | -4.51666600 | 5.61879800 | -5.52106400 |
| C | -7.12295900 | 8.59038200 | -5.65273300 |
| H | -8.16640600 | 6.70317900 | -5.52579800 |
| H | -8.05873600 | 7.54620700 | -3.98575500 |
| C | -6.29625900 | 8.27955500 | -6.90730100 |
| H | -4.48922900 | 7.20605000 | -7.46855100 |
| H | -4.37852400 | 8.06313300 | -5.93425500 |
| H | -8.02930100 | 9.14743000 | -5.92029700 |
| H | -6.53845500 | 9.24303800 | -4.98788100 |
| H | -6.00976700 | 9.20873800 | -7.41499700 |
| H | -6.91691600 | 7.71186000 | -7.61608300 |
| C | -8.57790800 | 1.96618700 | -4.29308200 |



|   |              |             |             |
|---|--------------|-------------|-------------|
| C | -9.87395900  | 2.47376300  | -4.95016100 |
| C | -7.73374300  | 1.16271000  | -5.30970500 |
| H | -8.86792100  | 1.26945400  | -3.49317000 |
| C | -10.67994600 | 1.31791700  | -5.55743200 |
| H | -9.62807700  | 3.18881200  | -5.74744600 |
| H | -10.47497200 | 3.02066100  | -4.21325200 |
| C | -8.54004200  | 0.01701800  | -5.93300100 |
| H | -7.39602600  | 1.84836000  | -6.10113600 |
| H | -6.83195900  | 0.77479200  | -4.82102300 |
| C | -9.84158800  | 0.52356900  | -6.56776500 |
| H | -11.58944000 | 1.70398100  | -6.03433500 |
| H | -11.00910000 | 0.64506000  | -4.75218400 |
| H | -7.92893200  | -0.50839900 | -6.67690200 |
| H | -8.78058700  | -0.71785700 | -5.15121600 |
| H | -10.42343000 | -0.31577500 | -6.96846700 |
| H | -9.59776400  | 1.17340700  | -7.42128700 |
| C | -1.43262400  | -1.77315700 | -5.92532900 |
| C | -0.90523100  | -0.67934800 | -6.87716800 |
| C | -1.32711800  | -3.15975100 | -6.59080900 |
| H | -2.49847800  | -1.56699200 | -5.75575000 |
| C | -1.62673500  | -0.71269200 | -8.23013900 |
| H | 0.17295700   | -0.82743800 | -7.03440100 |
| H | -1.02052500  | 0.30203700  | -6.40187300 |
| C | -2.04962800  | -3.19200100 | -7.94363600 |
| H | -0.26719400  | -3.41077300 | -6.74019100 |
| H | -1.73615600  | -3.92217100 | -5.91677300 |
| C | -1.52719400  | -2.09742400 | -8.88344700 |
| H | -1.21447000  | 0.05503800  | -8.89718900 |
| H | -2.68624800  | -0.46099300 | -8.07753900 |
| H | -1.93793000  | -4.17988900 | -8.40821500 |

|   |             |             |             |
|---|-------------|-------------|-------------|
| H | -3.12652100 | -3.04179900 | -7.77920800 |
| H | -2.07926200 | -2.11321300 | -9.83163900 |
| H | -0.47491800 | -2.30534900 | -9.12833500 |
| C | 2.74575600  | -2.19095500 | -3.06726800 |
| C | 3.10365800  | -3.63446600 | -3.47707000 |
| C | 3.60084900  | -1.18152000 | -3.86095000 |
| H | 3.01188600  | -2.07846300 | -2.00563400 |
| C | 4.60398500  | -3.91364100 | -3.32218100 |
| H | 2.81094100  | -3.79285300 | -4.52442600 |
| H | 2.51476700  | -4.34129000 | -2.87996100 |
| C | 5.10088300  | -1.46188300 | -3.70574000 |
| H | 3.32864300  | -1.23936500 | -4.92410000 |
| H | 3.36114800  | -0.16258200 | -3.53399000 |
| C | 5.44580800  | -2.90121600 | -4.10969600 |
| H | 4.83268100  | -4.93629700 | -3.64738500 |
| H | 4.87379100  | -3.85553900 | -2.25736400 |
| H | 5.68156200  | -0.74758200 | -4.30276700 |
| H | 5.39124600  | -1.30261400 | -2.65678600 |
| H | 6.51524900  | -3.09452600 | -3.95901200 |
| H | 5.25084600  | -3.02990900 | -5.18461300 |

### **Cy-R-TS2**

|   |             |             |            |
|---|-------------|-------------|------------|
| C | -0.72580000 | -3.22361800 | 4.30056100 |
| C | -1.48565300 | -2.08297700 | 3.98808800 |
| H | 1.05586900  | -4.33382700 | 3.93438100 |
| C | 0.48158400  | -3.45611800 | 3.65635500 |
| C | -0.98810000 | -1.15650000 | 3.05781700 |
| C | 0.21987100  | -1.44616000 | 2.39258800 |
| C | 0.97702100  | -2.60464400 | 2.65198800 |
| C | -1.73569200 | 0.08560600  | 2.70180700 |

|   |             |             |            |
|---|-------------|-------------|------------|
| C | -2.06839400 | 1.07399600  | 3.65712000 |
| C | -2.09923200 | 0.28788100  | 1.36453200 |
| C | -1.55352900 | 0.96273700  | 5.08156000 |
| C | -2.83002600 | 2.18694900  | 3.25860000 |
| C | -2.87535700 | 1.37472400  | 0.95553200 |
| C | -1.54484400 | 2.30417400  | 5.81926000 |
| H | -0.55224000 | 0.51940600  | 5.07044400 |
| C | -3.18285000 | 3.31011400  | 4.21907700 |
| C | -3.24168500 | 2.30392900  | 1.92626100 |
| C | -2.91343600 | 2.97342800  | 5.68739900 |
| H | -1.28404700 | 2.14314900  | 6.87180900 |
| H | -2.59234000 | 4.19723000  | 3.94582700 |
| H | -3.84131700 | 3.16079200  | 1.62788800 |
| H | -3.68606400 | 2.28746400  | 6.06250600 |
| H | -4.23293400 | 3.59530100  | 4.07601200 |
| H | -2.97283400 | 3.88340800  | 6.29573800 |
| H | -0.77364100 | 2.96106600  | 5.39407400 |
| H | -2.18267600 | 0.26700700  | 5.65118100 |
| C | -2.85827000 | -2.01532900 | 4.61147000 |
| H | -2.78050700 | -1.81932200 | 5.69090100 |
| H | -3.44637100 | -1.20083500 | 4.18215500 |
| C | -3.57822500 | -3.36410400 | 4.40158800 |
| H | -3.75008700 | -3.48535900 | 3.32591400 |
| H | -4.56561100 | -3.32895000 | 4.87548100 |
| C | -2.75844600 | -4.56729000 | 4.93984800 |
| H | -2.72661900 | -5.35631000 | 4.18056600 |
| H | -3.24538300 | -5.00109500 | 5.82055300 |
| C | -1.30898200 | -4.17476600 | 5.31367500 |
| H | -0.68484800 | -5.06902400 | 5.41490700 |
| H | -1.32073900 | -3.69045200 | 6.30084900 |

|   |             |             |             |
|---|-------------|-------------|-------------|
| C | 2.19678300  | -2.98673300 | 1.88963900  |
| C | 2.56440900  | -4.34369600 | 1.79434300  |
| C | 3.00719200  | -2.05292900 | 1.23254600  |
| C | 3.69160100  | -4.75891000 | 1.08742300  |
| H | 1.94987100  | -5.10258200 | 2.26862600  |
| C | 4.11112300  | -2.44173800 | 0.46474800  |
| H | 2.76761800  | -1.00101100 | 1.29577100  |
| C | 4.45493400  | -3.79386300 | 0.41247100  |
| H | 5.31479200  | -4.11053900 | -0.16885200 |
| C | -3.27660000 | 1.52262700  | -0.47096900 |
| C | -2.58103100 | 2.38350000  | -1.31903600 |
| C | -4.34335400 | 0.77248100  | -0.98546600 |
| C | -2.93762800 | 2.51669100  | -2.66879300 |
| H | -1.71215900 | 2.90928200  | -0.93510600 |
| C | -4.73214400 | 0.89418900  | -2.31997100 |
| H | -4.86903000 | 0.08118100  | -0.33168500 |
| C | -4.02572200 | 1.78169700  | -3.14519400 |
| H | -4.30751100 | 1.86451500  | -4.18933300 |
| O | 0.64964500  | -0.52467500 | 1.45135000  |
| O | -1.65889000 | -0.61211500 | 0.40637900  |
| P | -0.05334300 | -0.50955800 | -0.04074700 |
| O | 0.18805800  | -1.78906300 | -0.79207400 |
| O | 0.27798900  | 0.82300200  | -0.64988300 |
| H | -0.48401400 | -2.30215000 | -2.59369000 |
| C | -1.04897400 | -2.87276300 | -3.32345300 |
| S | 0.35628600  | -4.79476900 | -2.14017700 |
| O | 0.53288200  | -6.21067300 | -2.63515300 |
| C | 1.96165200  | -3.99062400 | -1.95476300 |
| H | 2.36318800  | -3.85835400 | -2.95934600 |
| H | 1.77900300  | -3.02544700 | -1.48026200 |

|   |             |             |             |
|---|-------------|-------------|-------------|
| H | 2.60530100  | -4.61877100 | -1.34270900 |
| C | -0.20520800 | -4.81799000 | -0.41548100 |
| H | 0.48493200  | -5.43811600 | 0.16059300  |
| H | -0.20467400 | -3.78527300 | -0.06043800 |
| H | -1.21049100 | -5.24424600 | -0.40713800 |
| C | -0.59976200 | -0.25683800 | -5.39301900 |
| C | 0.25403000  | 0.45797300  | -4.50545100 |
| C | 1.45198400  | 1.03124100  | -4.92333400 |
| C | 1.79460600  | 0.88537600  | -6.26673600 |
| C | 0.96224900  | 0.19091500  | -7.16468800 |
| C | -0.23206600 | -0.38280200 | -6.74049300 |
| C | -1.71011600 | -0.72146300 | -4.60758000 |
| C | -1.51266700 | -0.21575200 | -3.31183000 |
| H | 2.08934800  | 1.57002000  | -4.22949200 |
| H | 2.72155500  | 1.32022900  | -6.62831700 |
| H | 1.25868000  | 0.10707500  | -8.20604700 |
| H | -0.87508700 | -0.91009500 | -7.43972200 |
| H | -2.60590600 | -1.20623600 | -4.96244200 |
| H | -2.13657600 | -0.30824600 | -2.43671500 |
| N | -0.34987500 | 0.46448300  | -3.25504200 |
| H | 0.04806600  | 0.77138500  | -2.34429300 |
| C | -0.27982200 | -3.14474500 | -4.56734600 |
| O | 0.90691900  | -2.89662600 | -4.65805300 |
| O | -0.99537400 | -3.70091000 | -5.56522100 |
| C | -0.22551000 | -4.05480300 | -6.73055600 |
| H | -0.95084600 | -4.43429600 | -7.45001700 |
| H | 0.29395400  | -3.17773700 | -7.11914100 |
| H | 0.50406400  | -4.82670300 | -6.47368000 |
| C | -2.37819700 | -3.29849800 | -2.93885500 |
| C | -3.22357900 | -4.10814000 | -3.72827700 |

|   |             |             |             |
|---|-------------|-------------|-------------|
| C | -2.83589600 | -2.87129600 | -1.66967500 |
| C | -4.48244300 | -4.46638300 | -3.25995100 |
| H | -2.88323700 | -4.44820900 | -4.69644300 |
| C | -4.09869100 | -3.22834400 | -1.21629600 |
| H | -2.18962300 | -2.26273000 | -1.04888500 |
| C | -4.92739900 | -4.02723400 | -2.00903300 |
| H | -5.12492500 | -5.08908400 | -3.87505400 |
| H | -4.43224200 | -2.88108800 | -0.24310700 |
| H | -5.91562100 | -4.30757100 | -1.65590100 |
| C | -2.09428000 | 3.41070400  | -3.55855300 |
| C | -2.20742400 | 3.11246900  | -5.06137600 |
| C | -2.36988900 | 4.90755500  | -3.30068800 |
| H | -1.04704700 | 3.22735600  | -3.27447400 |
| C | -1.22896600 | 3.97533900  | -5.86649400 |
| H | -3.23099800 | 3.32709000  | -5.40160100 |
| H | -2.02394500 | 2.05076500  | -5.25297900 |
| C | -1.41370700 | 5.79465500  | -4.10929500 |
| H | -3.41130000 | 5.12700100  | -3.57751200 |
| H | -2.27777600 | 5.12428500  | -2.22975200 |
| C | -1.46680300 | 5.46927500  | -5.60834600 |
| H | -1.32399900 | 3.75252100  | -6.93639700 |
| H | -0.20102000 | 3.70773800  | -5.58365000 |
| H | -1.64687200 | 6.85349000  | -3.94062300 |
| H | -0.38887000 | 5.63653600  | -3.74299900 |
| H | -0.73232300 | 6.07460100  | -6.15429700 |
| H | -2.45642100 | 5.74638800  | -6.00083200 |
| C | -5.86914300 | 0.05683200  | -2.86912500 |
| C | -7.04364900 | 0.91883900  | -3.37401400 |
| C | -5.39427800 | -0.90382000 | -3.97800500 |
| H | -6.24825800 | -0.56616300 | -2.04554200 |

|   |             |             |             |
|---|-------------|-------------|-------------|
| C | -8.19164600 | 0.05422200  | -3.91068500 |
| H | -6.68353100 | 1.58189200  | -4.17313100 |
| H | -7.39574300 | 1.56984200  | -2.56474400 |
| C | -6.54238900 | -1.76703300 | -4.51143600 |
| H | -4.96683100 | -0.31627600 | -4.80275500 |
| H | -4.59134700 | -1.53737800 | -3.58990900 |
| C | -7.70827900 | -0.90320100 | -5.00809500 |
| H | -8.99935100 | 0.69287600  | -4.28926100 |
| H | -8.61767400 | -0.53256100 | -3.08352300 |
| H | -6.17843800 | -2.42361300 | -5.31181500 |
| H | -6.89608800 | -2.42668100 | -3.70613200 |
| H | -8.53503000 | -1.53679700 | -5.35280600 |
| H | -7.37725400 | -0.31659400 | -5.87774800 |
| C | 4.82159400  | -1.36706900 | -0.33970200 |
| C | 6.25619300  | -1.71142600 | -0.76586300 |
| C | 3.97911000  | -0.99069900 | -1.58297100 |
| H | 4.87371500  | -0.46852900 | 0.29404800  |
| C | 6.89919200  | -0.55145400 | -1.53824500 |
| H | 6.24260700  | -2.59828300 | -1.41537000 |
| H | 6.85937900  | -1.97247700 | 0.11278400  |
| C | 4.61612200  | 0.15352600  | -2.37907500 |
| H | 3.89445000  | -1.87814700 | -2.22527300 |
| H | 2.96011600  | -0.72420000 | -1.28194700 |
| C | 6.06445400  | -0.16933300 | -2.76813000 |
| H | 7.91981100  | -0.81956100 | -1.83880000 |
| H | 6.98610900  | 0.32049400  | -0.87375300 |
| H | 4.01693500  | 0.35677900  | -3.27558200 |
| H | 4.59769000  | 1.06929700  | -1.77051400 |
| H | 6.52113300  | 0.68207400  | -3.28846800 |
| H | 6.06659800  | -1.00999000 | -3.47752200 |

|   |            |             |             |
|---|------------|-------------|-------------|
| C | 4.06021500 | -6.23061300 | 1.03560600  |
| C | 3.91319700 | -6.83634700 | -0.37733000 |
| C | 5.48037800 | -6.48506900 | 1.58240800  |
| H | 3.35900600 | -6.76841000 | 1.69118900  |
| C | 4.28821400 | -8.32364200 | -0.40292500 |
| H | 4.56286500 | -6.28535500 | -1.07252300 |
| H | 2.88675700 | -6.71076600 | -0.74245700 |
| C | 5.84481500 | -7.97457000 | 1.55782000  |
| H | 6.20519800 | -5.92698200 | 0.97367700  |
| H | 5.55610000 | -6.08405500 | 2.60035800  |
| C | 5.69945400 | -8.56041500 | 0.14773300  |
| H | 4.20288200 | -8.71110700 | -1.42531300 |
| H | 3.56486500 | -8.88589900 | 0.20562200  |
| H | 6.86730500 | -8.11723100 | 1.92921200  |
| H | 5.18224900 | -8.52065100 | 2.24539200  |
| H | 5.93244900 | -9.63249700 | 0.15311000  |
| H | 6.43235800 | -8.08193700 | -0.51856000 |

### Cy-S-TS2

|   |             |             |            |
|---|-------------|-------------|------------|
| C | 0.39471500  | -3.64077800 | 3.50117000 |
| C | -0.66634600 | -2.71688300 | 3.45657700 |
| H | 2.29351000  | -4.23035000 | 2.69248200 |
| C | 1.48789200  | -3.50204200 | 2.65027800 |
| C | -0.59429300 | -1.61727400 | 2.57916300 |
| C | 0.51773100  | -1.52404000 | 1.72735200 |
| C | 1.56587800  | -2.45723100 | 1.71997500 |
| C | -1.65671300 | -0.57108100 | 2.47997800 |
| C | -2.03262400 | 0.20028200  | 3.60588600 |
| C | -2.26654600 | -0.31543500 | 1.23822800 |
| C | -1.24575600 | 0.10237800  | 4.90163700 |



|   |             |             |            |
|---|-------------|-------------|------------|
| C | -3.10123900 | 1.10523200  | 3.49338400 |
| C | -3.35229100 | 0.56650500  | 1.11534100 |
| C | -1.41740300 | 1.33360300  | 5.79545900 |
| H | -0.18837900 | -0.06541200 | 4.67149200 |
| C | -3.53352600 | 2.00001300  | 4.64274300 |
| C | -3.75814200 | 1.24114800  | 2.26924800 |
| C | -2.90622000 | 1.62466100  | 5.98708800 |
| H | -0.92205400 | 1.16006600  | 6.75787800 |
| H | -3.25311100 | 3.03518800  | 4.39840700 |
| H | -4.58395900 | 1.94399400  | 2.19078400 |
| H | -3.39698600 | 0.72909100  | 6.39365800 |
| H | -4.62878900 | 1.99708200  | 4.71421900 |
| H | -3.06563700 | 2.43164500  | 6.71156000 |
| H | -0.92965200 | 2.20368900  | 5.33497600 |
| H | -1.57123100 | -0.77447100 | 5.47443900 |
| C | -1.85940800 | -3.04506100 | 4.32149200 |
| H | -1.60966200 | -2.88150900 | 5.37981300 |
| H | -2.70273200 | -2.38874500 | 4.09240400 |
| C | -2.27187300 | -4.52186500 | 4.14467100 |
| H | -2.70677700 | -4.63658800 | 3.14621400 |
| H | -3.07160500 | -4.75732400 | 4.85516200 |
| C | -1.08639100 | -5.51002900 | 4.30962900 |
| H | -1.02782100 | -6.16442500 | 3.43213800 |
| H | -1.24921100 | -6.16622300 | 5.17161900 |
| C | 0.26664900  | -4.78423800 | 4.47531100 |
| H | 1.09509300  | -5.49060200 | 4.35626700 |
| H | 0.33422100  | -4.39611800 | 5.50218900 |
| C | 2.63497300  | -2.40104100 | 0.69460900 |
| C | 3.07773500  | -3.57831300 | 0.07575800 |
| C | 3.17282300  | -1.18337800 | 0.26547700 |

|   |             |             |             |
|---|-------------|-------------|-------------|
| C | 4.02168600  | -3.55026300 | -0.95357600 |
| H | 2.65391200  | -4.53268600 | 0.37916400  |
| C | 4.07719000  | -1.11653000 | -0.79652300 |
| H | 2.84886600  | -0.26394200 | 0.73712300  |
| C | 4.50137100  | -2.30882500 | -1.39163700 |
| H | 5.21286500  | -2.27297800 | -2.20800800 |
| C | -4.07788700 | 0.79496200  | -0.16109200 |
| C | -3.40495200 | 1.08971000  | -1.35453000 |
| C | -5.48098700 | 0.77688200  | -0.16511200 |
| C | -4.11282600 | 1.37903900  | -2.52565100 |
| H | -2.32052800 | 1.11349700  | -1.37080100 |
| C | -6.21212900 | 1.05994800  | -1.32270500 |
| H | -6.01085000 | 0.52760500  | 0.75117900  |
| C | -5.51169200 | 1.36802700  | -2.49424100 |
| H | -6.06721300 | 1.59525100  | -3.40003900 |
| O | 0.51401700  | -0.49661600 | 0.79713500  |
| O | -1.86411300 | -1.02178400 | 0.11808100  |
| P | -0.34683700 | -0.83795300 | -0.56933300 |
| O | -0.01041300 | -2.20626900 | -1.09305200 |
| O | -0.26351500 | 0.36600900  | -1.46215700 |
| H | -1.20322000 | -2.97066400 | -2.36023200 |
| C | -1.67970600 | -3.70600700 | -3.00421000 |
| S | -2.36409800 | -4.87585500 | -0.78139400 |
| O | -2.93766000 | -6.26684600 | -0.82133800 |
| C | -0.81984000 | -4.86737800 | 0.16291000  |
| H | -0.14045100 | -5.55238600 | -0.34918300 |
| H | -0.41557300 | -3.85196200 | 0.13172800  |
| H | -1.01766100 | -5.21223900 | 1.17988000  |
| C | -3.38579400 | -3.80160700 | 0.26197900  |
| H | -3.44000100 | -4.22853900 | 1.26574000  |

|   |             |             |             |
|---|-------------|-------------|-------------|
| H | -2.92952900 | -2.80926000 | 0.26133400  |
| H | -4.37882800 | -3.76861100 | -0.18894700 |
| C | 0.11508700  | -2.51839000 | -5.50809400 |
| C | 0.99516000  | -1.78766800 | -4.65521800 |
| C | 2.37583300  | -1.98211000 | -4.67449200 |
| C | 2.87674100  | -2.91573000 | -5.57908600 |
| C | 2.02587900  | -3.64899300 | -6.42853700 |
| C | 0.64937000  | -3.46173400 | -6.39883800 |
| C | -1.21801200 | -2.12267500 | -5.16168300 |
| C | -1.09609500 | -1.16554400 | -4.15277500 |
| H | 3.03056900  | -1.45009300 | -3.99363100 |
| H | 3.94824200  | -3.08621300 | -5.62340600 |
| H | 2.45525500  | -4.37686900 | -7.11056900 |
| H | -0.00533900 | -4.04294800 | -7.04118600 |
| H | -2.13634100 | -2.43605500 | -5.63595800 |
| H | -1.85485800 | -0.64835600 | -3.58900900 |
| N | 0.21241500  | -0.95190000 | -3.87155700 |
| H | 0.47501500  | -0.40628900 | -3.04542400 |
| C | -3.11664800 | -3.47527900 | -3.31673000 |
| O | -3.81114500 | -4.10826800 | -4.08789100 |
| O | -3.56202700 | -2.43660800 | -2.58060400 |
| C | -4.96056400 | -2.12090500 | -2.69783200 |
| H | -5.15087500 | -1.37866400 | -1.92678500 |
| H | -5.17211200 | -1.70353600 | -3.68458500 |
| H | -5.56295500 | -3.02102000 | -2.55065900 |
| C | -0.85722100 | -4.75712600 | -3.51540400 |
| C | 0.50762000  | -4.73826300 | -3.13372500 |
| C | -1.33838000 | -5.80162700 | -4.33740600 |
| C | 1.36046900  | -5.74258000 | -3.56833600 |
| H | 0.86497700  | -3.93069800 | -2.50175700 |

|   |             |             |             |
|---|-------------|-------------|-------------|
| C | -0.47098200 | -6.79914800 | -4.76080200 |
| H | -2.38305800 | -5.80848600 | -4.62031700 |
| C | 0.87405200  | -6.77383900 | -4.37641500 |
| H | 2.40427000  | -5.72295000 | -3.28326500 |
| H | -0.84153200 | -7.60481800 | -5.38737700 |
| H | 1.54684600  | -7.55848000 | -4.71152800 |
| C | -3.35741200 | 1.73212400  | -3.79146800 |
| C | -3.79334800 | 0.89646400  | -5.01158500 |
| C | -3.46206500 | 3.23575800  | -4.12225300 |
| H | -2.29521600 | 1.52247700  | -3.60490400 |
| C | -2.96125700 | 1.24157700  | -6.25222300 |
| H | -4.85426500 | 1.08815400  | -5.22426300 |
| H | -3.71388500 | -0.17301200 | -4.78312400 |
| C | -2.63884000 | 3.59344700  | -5.36633600 |
| H | -4.51833800 | 3.49212600  | -4.28955700 |
| H | -3.12957400 | 3.82267100  | -3.25803400 |
| C | -3.04392900 | 2.73935600  | -6.57511500 |
| H | -3.29782600 | 0.64594900  | -7.11004400 |
| H | -1.91396700 | 0.96272600  | -6.07001500 |
| H | -2.74980600 | 4.65997100  | -5.59872900 |
| H | -1.57379700 | 3.42824800  | -5.14880300 |
| H | -2.41145700 | 2.97771600  | -7.43918000 |
| H | -4.07632600 | 2.98839700  | -6.86228800 |
| C | -7.72644600 | 1.00494900  | -1.31032900 |
| C | -8.36768100 | 2.35068900  | -1.70546400 |
| C | -8.26560500 | -0.12953400 | -2.20753700 |
| H | -8.04298800 | 0.78287500  | -0.28044300 |
| C | -9.89965300 | 2.27948400  | -1.67763800 |
| H | -8.03693500 | 2.62451800  | -2.71695100 |
| H | -8.00405800 | 3.13923700  | -1.03572800 |

|   |              |             |             |
|---|--------------|-------------|-------------|
| C | -9.79769300  | -0.19760000 | -2.18488500 |
| H | -7.92264100  | 0.03726200  | -3.23845200 |
| H | -7.83496400  | -1.08638700 | -1.88584600 |
| C | -10.42304400 | 1.14857900  | -2.57245500 |
| H | -10.32670400 | 3.24116700  | -1.98792600 |
| H | -10.23473400 | 2.10634000  | -0.64442400 |
| H | -10.14943600 | -0.99090300 | -2.85612000 |
| H | -10.13094400 | -0.47190300 | -1.17329200 |
| H | -11.51700200 | 1.09101700  | -2.51504300 |
| H | -10.17398900 | 1.37342700  | -3.61999300 |
| C | 4.49288700   | 0.25895400  | -1.28930500 |
| C | 5.72857500   | 0.27884000  | -2.20088400 |
| C | 3.30736400   | 0.95946500  | -1.99558600 |
| H | 4.73298300   | 0.86300300  | -0.40026000 |
| C | 6.09641900   | 1.71114500  | -2.61105900 |
| H | 5.52121200   | -0.30380700 | -3.11045900 |
| H | 6.57582600   | -0.20819500 | -1.70174300 |
| C | 3.66432500   | 2.38896900  | -2.41725400 |
| H | 3.04340700   | 0.37662400  | -2.88972600 |
| H | 2.41932900   | 0.95426200  | -1.35558400 |
| C | 4.91956600   | 2.41629000  | -3.29860500 |
| H | 6.97288100   | 1.69963200  | -3.27100500 |
| H | 6.38568200   | 2.27928300  | -1.71497900 |
| H | 2.81630500   | 2.84594500  | -2.94159000 |
| H | 3.83985100   | 2.99559200  | -1.51684300 |
| H | 5.18978300   | 3.44935000  | -3.55071600 |
| H | 4.70231400   | 1.90688600  | -4.24917200 |
| C | 4.51917000   | -4.86102300 | -1.53363600 |
| C | 4.92945000   | -4.79136800 | -3.01375900 |
| C | 5.68468800   | -5.43345100 | -0.69659400 |

|   |            |             |             |
|---|------------|-------------|-------------|
| H | 3.69166600 | -5.58355400 | -1.45527200 |
| C | 5.35095000 | -6.16858200 | -3.54108900 |
| H | 5.77816600 | -4.10302400 | -3.12615400 |
| H | 4.11154600 | -4.37645200 | -3.61219800 |
| C | 6.13396800 | -6.80476300 | -1.21765200 |
| H | 6.52353400 | -4.72387500 | -0.73545700 |
| H | 5.38231100 | -5.50170800 | 0.35522800  |
| C | 6.49898100 | -6.75279300 | -2.70720400 |
| H | 5.64282600 | -6.09535200 | -4.59613900 |
| H | 4.49111100 | -6.85463500 | -3.50187900 |
| H | 6.98425000 | -7.17228500 | -0.62983500 |
| H | 5.31724500 | -7.52731500 | -1.07260600 |
| H | 6.76522200 | -7.75334700 | -3.06983300 |
| H | 7.39080200 | -6.12269300 | -2.83774900 |

**S<sup>j</sup>Pr-cat**

|   |             |             |             |
|---|-------------|-------------|-------------|
| C | -2.02160000 | -1.12093200 | 1.37932700  |
| C | -2.87640200 | -0.00512700 | 1.39772500  |
| H | -0.60992400 | -2.26777500 | 0.23741500  |
| C | -1.28302500 | -1.41494100 | 0.23901900  |
| C | -2.98971700 | 0.80988900  | 0.25430400  |
| C | -2.30768000 | 0.40973800  | -0.91238700 |
| C | -1.42358800 | -0.67556600 | -0.94262300 |
| C | -3.80665100 | 2.06167800  | 0.24236700  |
| C | -3.57935400 | 3.14567000  | 1.11368000  |
| C | -4.79148000 | 2.21628900  | -0.74065200 |
| C | -2.46828600 | 3.20881000  | 2.13354700  |
| C | -4.36453300 | 4.30883200  | 0.99867900  |
| C | -5.55481100 | 3.37695100  | -0.90813000 |
| C | -2.95394800 | 3.72259500  | 3.50991600  |

|   |             |             |             |
|---|-------------|-------------|-------------|
| H | -1.71306000 | 3.91147200  | 1.75154200  |
| C | -4.08568100 | 5.42895400  | 1.96957400  |
| C | -5.33886100 | 4.41078700  | 0.00998500  |
| C | -3.98454400 | 4.87621900  | 3.40248600  |
| H | -3.40093600 | 2.89345000  | 4.06665800  |
| H | -3.13823000 | 5.92253700  | 1.70483200  |
| H | -5.92643300 | 5.32111000  | -0.07465600 |
| H | -4.97649100 | 4.51170800  | 3.69257100  |
| H | -4.86537000 | 6.19555000  | 1.90540400  |
| H | -3.73177100 | 5.68461600  | 4.09713300  |
| H | -2.07742500 | 4.04259300  | 4.08422300  |
| H | -1.95839600 | 2.25029800  | 2.23865600  |
| C | -3.70446400 | 0.17061600  | 2.64942400  |
| H | -4.24833700 | 1.11687200  | 2.64479900  |
| H | -4.47369500 | -0.61562700 | 2.63585200  |
| C | -2.88665200 | 0.01875400  | 3.95611900  |
| H | -3.58133200 | -0.24338000 | 4.76200000  |
| H | -2.45117200 | 0.98442700  | 4.22954500  |
| C | -1.75639400 | -1.03508700 | 3.85513000  |
| H | -1.70500000 | -1.63142900 | 4.77270800  |
| H | -0.78919700 | -0.52908200 | 3.75412200  |
| C | -1.93430500 | -1.95308500 | 2.63375300  |
| H | -2.85319300 | -2.54662300 | 2.75565900  |
| H | -1.10769300 | -2.66810100 | 2.56186300  |
| C | -0.61785700 | -1.03766200 | -2.13715400 |
| C | -1.20885300 | -1.25399500 | -3.38899500 |
| C | 0.76500300  | -1.20037000 | -2.00079300 |
| C | -0.43690200 | -1.60758200 | -4.49513300 |
| H | -2.28139200 | -1.15640700 | -3.50647600 |
| C | 1.56225800  | -1.56209000 | -3.09321600 |

|   |              |             |             |
|---|--------------|-------------|-------------|
| H | 1.22264600   | -1.02042300 | -1.03171500 |
| C | 0.94641100   | -1.75776800 | -4.33074700 |
| H | 1.56289800   | -2.03221600 | -5.18415300 |
| C | -6.41582400  | 3.55132400  | -2.10304200 |
| C | -6.30462600  | 4.72754300  | -2.85665000 |
| C | -7.24989400  | 2.52634300  | -2.57334800 |
| C | -6.98904800  | 4.88003600  | -4.06815000 |
| H | -5.63488100  | 5.50932200  | -2.51108400 |
| C | -7.92531800  | 2.63971900  | -3.78944500 |
| H | -7.34304200  | 1.61046300  | -2.00099700 |
| C | -7.78261500  | 3.82360300  | -4.52524200 |
| H | -8.28967800  | 3.92841800  | -5.48069900 |
| O | -2.46037800  | 1.16774100  | -2.08599000 |
| O | -4.95320800  | 1.17638400  | -1.66410800 |
| P | -3.87311200  | 1.12050300  | -2.87339400 |
| O | -4.17221500  | 0.00046200  | -3.78664300 |
| O | -3.79106200  | 2.58937200  | -3.51907800 |
| H | -4.59667600  | 2.80212400  | -4.02251600 |
| C | -6.83244200  | 6.14558100  | -4.89453900 |
| H | -7.48827900  | 6.04546000  | -5.76947500 |
| C | -8.70070100  | 1.44715600  | -4.32346400 |
| H | -8.93601800  | 0.80655700  | -3.46325100 |
| C | -10.02552800 | 1.82817700  | -4.99763100 |
| H | -9.86058600  | 2.40191600  | -5.91690700 |
| H | -10.58318500 | 0.92646700  | -5.27371500 |
| H | -10.65387900 | 2.43026900  | -4.33242400 |
| C | -7.80349400  | 0.63255200  | -5.27606400 |
| H | -7.53537900  | 1.23204500  | -6.15487700 |
| H | -6.87540800  | 0.32138200  | -4.78429600 |
| H | -8.32495500  | -0.26560800 | -5.62733200 |



|   |             |             |             |
|---|-------------|-------------|-------------|
| C | -7.27972500 | 7.39349700  | -4.11607500 |
| H | -7.21508200 | 8.28686700  | -4.74770300 |
| H | -8.31297000 | 7.29164500  | -3.76793300 |
| H | -6.64524900 | 7.55999800  | -3.23784200 |
| C | -5.39023600 | 6.30036400  | -5.40745000 |
| H | -4.68501100 | 6.40611200  | -4.57502600 |
| H | -5.08496100 | 5.42750100  | -5.99503500 |
| H | -5.29600300 | 7.18921800  | -6.04182800 |
| C | -1.10151500 | -1.81569200 | -5.84565500 |
| H | -2.17576700 | -1.64464100 | -5.70390000 |
| C | 3.06523300  | -1.72618700 | -2.93998100 |
| H | 3.46107800  | -2.02211300 | -3.92074800 |
| C | 3.74031700  | -0.40180500 | -2.54590600 |
| H | 3.39249800  | -0.05999800 | -1.56411200 |
| H | 4.82907800  | -0.52046200 | -2.49295000 |
| H | 3.51360800  | 0.38585900  | -3.27206500 |
| C | 3.41438200  | -2.84224700 | -1.94142900 |
| H | 3.05607600  | -2.59620300 | -0.93495300 |
| H | 2.95520600  | -3.79175200 | -2.23636300 |
| H | 4.49964200  | -2.98691500 | -1.88319000 |
| C | -0.60109000 | -0.79107300 | -6.87747500 |
| H | -1.12710300 | -0.91374500 | -7.83165000 |
| H | -0.76518800 | 0.23191400  | -6.52303100 |
| H | 0.47191000  | -0.91254100 | -7.06858300 |
| C | -0.91371000 | -3.25341900 | -6.35658500 |
| H | -1.44466000 | -3.40056200 | -7.30449900 |
| H | 0.14580700  | -3.47744600 | -6.52912700 |
| H | -1.29569100 | -3.98097300 | -5.63252700 |

|   |             |             |            |
|---|-------------|-------------|------------|
| C | -0.38157900 | -3.40251000 | 3.94141300 |
| C | -1.24587200 | -2.33232100 | 3.65381600 |
| H | 1.47729300  | -4.35413000 | 3.52403200 |
| C | 0.82115500  | -3.53131500 | 3.26025500 |
| C | -0.86044200 | -1.37145100 | 2.70562200 |
| C | 0.33763100  | -1.56780200 | 1.99166600 |
| C | 1.20361500  | -2.65269500 | 2.22991400 |
| C | -1.71611100 | -0.19109300 | 2.38661900 |
| C | -2.08459500 | 0.75945000  | 3.36726200 |
| C | -2.15768900 | -0.01223100 | 1.06947100 |
| C | -1.49427400 | 0.68187400  | 4.76470000 |
| C | -2.96190300 | 1.80193400  | 3.02040100 |
| C | -3.04509600 | 1.00702100  | 0.71272400 |
| C | -1.57287600 | 2.01083000  | 5.52057300 |
| H | -0.45821200 | 0.33299500  | 4.70092700 |
| C | -3.36654600 | 2.88076800  | 4.01065000 |
| C | -3.44722200 | 1.89073700  | 1.71078400 |
| C | -3.00074700 | 2.55481400  | 5.46040800 |
| H | -1.25005800 | 1.86325500  | 6.55777200 |
| H | -2.86938800 | 3.81918300  | 3.72328500 |
| H | -4.13438500 | 2.69276000  | 1.45125400 |
| H | -3.69047500 | 1.79789600  | 5.85987500 |
| H | -4.44307500 | 3.07361800  | 3.91910400 |
| H | -3.11343100 | 3.44931900  | 6.08392900 |
| H | -0.88456200 | 2.73946600  | 5.07069600 |
| H | -2.02894500 | -0.07472700 | 5.35301000 |
| C | -2.60285900 | -2.38605900 | 4.31143700 |
| H | -2.51750600 | -2.19411000 | 5.39091100 |
| H | -3.26889800 | -1.62184100 | 3.90411000 |
| C | -3.20592200 | -3.79150600 | 4.10294300 |

|   |             |             |             |
|---|-------------|-------------|-------------|
| H | -3.38655000 | -3.92041000 | 3.02892200  |
| H | -4.18324100 | -3.84794700 | 4.59520600  |
| C | -2.27179200 | -4.92107800 | 4.61442200  |
| H | -2.18496000 | -5.69852900 | 3.84754200  |
| H | -2.70073400 | -5.40256000 | 5.50041800  |
| C | -0.85530200 | -4.40358200 | 4.96327900  |
| H | -0.15316300 | -5.23984300 | 5.04705700  |
| H | -0.89024400 | -3.92579300 | 5.95295100  |
| C | 2.41449900  | -2.94471000 | 1.41382100  |
| C | 2.89965300  | -4.26325500 | 1.33474100  |
| C | 3.08678700  | -1.95895200 | 0.67594200  |
| C | 4.00427100  | -4.60091000 | 0.55114900  |
| H | 2.38832800  | -5.05198000 | 1.87440200  |
| C | 4.16694300  | -2.27329100 | -0.15186800 |
| H | 2.74518500  | -0.93641900 | 0.72755500  |
| C | 4.62321400  | -3.59285200 | -0.19636300 |
| H | 5.46591500  | -3.84583100 | -0.83728800 |
| C | -3.51539100 | 1.12785100  | -0.69581300 |
| C | -2.80064200 | 1.91875700  | -1.60406200 |
| C | -4.63566800 | 0.41698500  | -1.13002200 |
| C | -3.18870200 | 1.99916400  | -2.94217800 |
| H | -1.90636700 | 2.41979900  | -1.25576600 |
| C | -5.05031100 | 0.47897300  | -2.46701900 |
| H | -5.17161900 | -0.20436200 | -0.41813400 |
| C | -4.31798400 | 1.27365200  | -3.35041400 |
| H | -4.61500600 | 1.30603900  | -4.39711800 |
| C | -6.26001700 | -0.30362000 | -2.94948500 |
| C | -7.56105400 | 0.28651800  | -2.37866200 |
| H | -8.43645000 | -0.24885300 | -2.76525800 |
| H | -7.57458100 | 0.21009300  | -1.28505200 |

|   |             |             |             |
|---|-------------|-------------|-------------|
| H | -7.66042900 | 1.34522400  | -2.64023800 |
| C | -6.15136600 | -1.80199100 | -2.62451100 |
| H | -6.99979700 | -2.35211700 | -3.04788000 |
| H | -5.22989400 | -2.23703700 | -3.02295800 |
| H | -6.14981300 | -1.97740000 | -1.54376900 |
| C | -2.41725900 | 2.81067600  | -3.97374900 |
| C | -1.03609300 | 3.27449600  | -3.49726600 |
| H | -0.43925300 | 2.45226400  | -3.09279400 |
| H | -0.48612300 | 3.72553300  | -4.33039900 |
| H | -1.12259400 | 4.03411300  | -2.71117500 |
| C | -3.25168300 | 4.01636400  | -4.44550700 |
| H | -4.22342100 | 3.70391400  | -4.84184800 |
| H | -3.43621400 | 4.70257400  | -3.61049000 |
| H | -2.72442600 | 4.56969700  | -5.23147000 |
| C | 4.78969200  | -1.19735700 | -1.02553200 |
| C | 3.78219500  | -0.70481300 | -2.08244200 |
| H | 2.90959300  | -0.23203900 | -1.61796800 |
| H | 4.25175400  | 0.03113100  | -2.74653200 |
| H | 3.41818000  | -1.53613300 | -2.69581500 |
| C | 5.33621200  | -0.02415800 | -0.19632300 |
| H | 4.52970500  | 0.49218200  | 0.33594900  |
| H | 6.06331200  | -0.36928400 | 0.54680800  |
| H | 5.82825700  | 0.70961500  | -0.84527200 |
| C | 4.53907600  | -6.02535300 | 0.51705600  |
| C | 5.27426900  | -6.35165600 | 1.82969100  |
| H | 4.58093500  | -6.31984400 | 2.67867900  |
| H | 5.71789900  | -7.35364900 | 1.79208000  |
| H | 6.07189400  | -5.62699600 | 2.02408600  |
| C | 3.45819000  | -7.08012700 | 0.22682100  |
| H | 2.70385600  | -7.10764200 | 1.02228500  |

|   |             |             |             |
|---|-------------|-------------|-------------|
| H | 2.93998700  | -6.90089500 | -0.72111600 |
| H | 3.90751000  | -8.07841200 | 0.17533700  |
| O | 0.62517600  | -0.63908700 | 1.00087300  |
| O | -1.72948800 | -0.89016800 | 0.08898000  |
| P | -0.14657300 | -0.81290200 | -0.44648900 |
| O | 0.08188500  | -2.17338400 | -1.04272200 |
| O | 0.11337000  | 0.43829700  | -1.23665500 |
| H | -0.85718300 | -2.89099100 | -2.61832300 |
| C | -1.49882200 | -3.53621900 | -3.20931800 |
| S | 0.30751100  | -5.26859200 | -2.14537900 |
| O | 0.54544600  | -6.70572600 | -2.55035500 |
| C | 1.85713800  | -4.33820800 | -2.25852100 |
| H | 2.09089500  | -4.25768400 | -3.32084400 |
| H | 1.67676400  | -3.35243000 | -1.82557900 |
| H | 2.63472200  | -4.87548700 | -1.71666100 |
| C | -0.00269700 | -5.19163900 | -0.35877900 |
| H | 0.78618500  | -5.74665600 | 0.15040400  |
| H | -0.00677500 | -4.13920600 | -0.06991200 |
| H | -0.97569200 | -5.65475900 | -0.18129500 |
| C | -1.72644800 | -1.18191400 | -5.59022300 |
| C | -0.71109900 | -0.37972300 | -4.99479800 |
| C | 0.33110200  | 0.17174100  | -5.73509300 |
| C | 0.34754700  | -0.08864200 | -7.10352000 |
| C | -0.64672900 | -0.87706700 | -7.71513200 |
| C | -1.68350200 | -1.42866500 | -6.97083500 |
| C | -2.59062700 | -1.60287900 | -4.52541800 |
| C | -2.10796400 | -0.98836400 | -3.35721200 |
| H | 1.09814100  | 0.77600500  | -5.26164900 |
| H | 1.14504300  | 0.32618000  | -7.71270200 |
| H | -0.60130400 | -1.05104300 | -8.78614300 |

|   |             |             |             |
|---|-------------|-------------|-------------|
| H | -2.45073400 | -2.03354600 | -7.44607800 |
| H | -3.51643200 | -2.15056000 | -4.61121500 |
| H | -2.51260700 | -1.00070400 | -2.35679100 |
| N | -0.99213800 | -0.28540600 | -3.63841600 |
| H | -0.41767000 | 0.13229300  | -2.88377900 |
| C | -0.91005100 | -3.86460400 | -4.53384100 |
| O | 0.21260400  | -3.51217700 | -4.84051800 |
| O | -1.70577400 | -4.58816600 | -5.34561000 |
| C | -1.09249300 | -4.98625600 | -6.58738700 |
| H | -1.87104200 | -5.51688000 | -7.13521300 |
| H | -0.75265700 | -4.10735300 | -7.13719900 |
| H | -0.24367900 | -5.64476600 | -6.38784700 |
| C | -2.68730600 | -4.04336500 | -2.56127000 |
| C | -3.60466300 | -4.94242700 | -3.14746900 |
| C | -2.92104600 | -3.59675100 | -1.23813400 |
| C | -4.71480600 | -5.37142800 | -2.42938800 |
| H | -3.43374000 | -5.29491200 | -4.15540700 |
| C | -4.03215800 | -4.03380700 | -0.53056500 |
| H | -2.22040900 | -2.90873100 | -0.78073600 |
| C | -4.93417300 | -4.92197500 | -1.12325800 |
| H | -5.41428200 | -6.06383200 | -2.88830400 |
| H | -4.19545300 | -3.67547800 | 0.48184400  |
| H | -5.80578700 | -5.26299300 | -0.57191100 |
| H | -2.26544300 | 2.15236200  | -4.84100000 |
| H | -6.29775800 | -0.20027200 | -4.04242200 |
| H | 5.63608600  | -1.65529400 | -1.55548600 |
| H | 5.27508600  | -6.07386900 | -0.29663800 |

***i*Pr-S-TS2**

|   |             |             |            |
|---|-------------|-------------|------------|
| C | -0.09685000 | -3.41914300 | 3.81226600 |
|---|-------------|-------------|------------|

|   |             |             |            |
|---|-------------|-------------|------------|
| C | -1.04697800 | -2.40393300 | 3.60228900 |
| H | 1.78466600  | -4.24920300 | 3.25157800 |
| C | 1.07023800  | -3.45507900 | 3.05980400 |
| C | -0.77483000 | -1.39221000 | 2.66394400 |
| C | 0.40353500  | -1.48108900 | 1.90035000 |
| C | 1.34035800  | -2.52210200 | 2.04273300 |
| C | -1.73867000 | -0.28282000 | 2.39745900 |
| C | -2.17014500 | 0.58486500  | 3.42875600 |
| C | -2.25021300 | -0.10929600 | 1.10120200 |
| C | -1.47316800 | 0.57214400  | 4.77870600 |
| C | -3.21067200 | 1.49342700  | 3.17337600 |
| C | -3.30549900 | 0.77356900  | 0.83629200 |
| C | -1.68600100 | 1.86710900  | 5.56750400 |
| H | -0.40540100 | 0.37829900  | 4.63125800 |
| C | -3.70174800 | 2.47887900  | 4.21988800 |
| C | -3.78610000 | 1.53718800  | 1.90053700 |
| C | -3.17921400 | 2.19146300  | 5.62929300 |
| H | -1.26396200 | 1.75782300  | 6.57330500 |
| H | -3.38051700 | 3.48810200  | 3.92265400 |
| H | -4.60022900 | 2.23262400  | 1.71015900 |
| H | -3.71494000 | 1.33402400  | 6.06054800 |
| H | -4.79909800 | 2.50111200  | 4.21232500 |
| H | -3.37452800 | 3.05013800  | 6.28201600 |
| H | -1.15096400 | 2.69514900  | 5.08263300 |
| H | -1.84717800 | -0.25843900 | 5.38927400 |
| C | -2.34041500 | -2.54884400 | 4.36632600 |
| H | -2.16209600 | -2.35002300 | 5.43302400 |
| H | -3.08281000 | -1.82146200 | 4.03084000 |
| C | -2.90301500 | -3.98118300 | 4.22831800 |
| H | -3.31193600 | -4.09287900 | 3.21866800 |

|   |             |             |             |
|---|-------------|-------------|-------------|
| H | -3.74755600 | -4.09376100 | 4.91698000  |
| C | -1.83777100 | -5.08108100 | 4.48982300  |
| H | -1.73870900 | -5.71794700 | 3.60294600  |
| H | -2.15312800 | -5.73742400 | 5.30833400  |
| C | -0.44987100 | -4.48704700 | 4.81535500  |
| H | 0.30977100  | -5.27595600 | 4.82862400  |
| H | -0.47403200 | -4.05711000 | 5.82727500  |
| C | 2.47616400  | -2.74236200 | 1.10556900  |
| C | 2.94878100  | -4.04904300 | 0.89697700  |
| C | 3.04803500  | -1.71334500 | 0.33935500  |
| C | 3.92274400  | -4.34391200 | -0.05775400 |
| H | 2.52001400  | -4.87408100 | 1.45571000  |
| C | 3.98419000  | -1.98279800 | -0.66007200 |
| H | 2.72133100  | -0.69861600 | 0.49998100  |
| C | 4.41246800  | -3.30183500 | -0.84985500 |
| H | 5.14484800  | -3.51242900 | -1.62724700 |
| C | -3.91779400 | 0.90992300  | -0.51259000 |
| C | -3.16049400 | 1.36974600  | -1.60017100 |
| C | -5.28268800 | 0.66323700  | -0.68072100 |
| C | -3.75094000 | 1.59809600  | -2.84823800 |
| H | -2.10819100 | 1.56523100  | -1.44019500 |
| C | -5.89896000 | 0.85678500  | -1.92384900 |
| H | -5.86476600 | 0.32521400  | 0.17266200  |
| C | -5.11932400 | 1.31105400  | -2.98907700 |
| H | -5.60700400 | 1.47037700  | -3.94622600 |
| O | 0.58492500  | -0.49601100 | 0.94026700  |
| O | -1.76768100 | -0.88783100 | 0.06326200  |
| P | -0.20545400 | -0.71751700 | -0.48846300 |
| O | 0.12067200  | -2.05261800 | -1.09401100 |
| O | -0.01909700 | 0.55131900  | -1.27824200 |



|   |             |             |             |
|---|-------------|-------------|-------------|
| H | -0.94392700 | -2.79076300 | -2.48826200 |
| C | -1.23637600 | -3.49246400 | -3.26331200 |
| S | -1.59063700 | -5.08746100 | -0.97750400 |
| O | -2.16497700 | -6.48375900 | -0.92055900 |
| C | 0.12770300  | -5.11482600 | -0.40302400 |
| H | 0.70835700  | -5.69919200 | -1.11928300 |
| H | 0.48187700  | -4.08312800 | -0.37446800 |
| H | 0.15990700  | -5.58169100 | 0.58462600  |
| C | -2.29163400 | -4.08996600 | 0.37016500  |
| H | -2.04408500 | -4.55715200 | 1.32629000  |
| H | -1.88485400 | -3.08051600 | 0.30202400  |
| H | -3.37333900 | -4.07074600 | 0.22327200  |
| C | 0.02314200  | -1.77734600 | -5.60377200 |
| C | 0.78360700  | -0.92906700 | -4.75152100 |
| C | 2.15744600  | -0.75701500 | -4.90086600 |
| C | 2.77778800  | -1.46818300 | -5.92665700 |
| C | 2.04759900  | -2.32128300 | -6.77517000 |
| C | 0.67422700  | -2.48265600 | -6.62535400 |
| C | -1.32041400 | -1.76584300 | -5.10013800 |
| C | -1.32402700 | -0.88417500 | -4.00358600 |
| H | 2.71867600  | -0.10710400 | -4.23809300 |
| H | 3.84917800  | -1.36388400 | -6.07109000 |
| H | 2.56916700  | -2.86570900 | -7.55654200 |
| H | 0.11862500  | -3.15208600 | -7.27453300 |
| H | -2.18888300 | -2.21540800 | -5.55801100 |
| H | -2.13135200 | -0.62156600 | -3.33476400 |
| N | -0.08600200 | -0.38843500 | -3.80909200 |
| H | 0.15551800  | 0.09979600  | -2.92514500 |
| C | -2.69889600 | -3.66486300 | -3.45284700 |
| O | -3.26213500 | -4.40673100 | -4.23347900 |

|   |             |             |             |
|---|-------------|-------------|-------------|
| O | -3.33747900 | -2.81656600 | -2.61831200 |
| C | -4.77089200 | -2.81220600 | -2.67604000 |
| H | -5.07714300 | -2.03659900 | -1.97654300 |
| H | -5.11056000 | -2.57387500 | -3.68761400 |
| H | -5.16594700 | -3.78945200 | -2.38571000 |
| C | -0.18915500 | -4.27019900 | -3.84388000 |
| C | 1.13251300  | -3.92761400 | -3.46435000 |
| C | -0.39966100 | -5.31945600 | -4.76766800 |
| C | 2.21118400  | -4.61122500 | -4.00625300 |
| H | 1.27885400  | -3.13352100 | -2.73945900 |
| C | 0.68950000  | -6.01050100 | -5.28070200 |
| H | -1.41353400 | -5.57457400 | -5.05070400 |
| C | 1.99219300  | -5.65845200 | -4.90532700 |
| H | 3.21875400  | -4.33444600 | -3.71692700 |
| H | 0.52924500  | -6.82716000 | -5.97825400 |
| H | 2.83740500  | -6.20268200 | -5.31748600 |
| C | -7.39511400 | 0.64515000  | -2.09828100 |
| H | -7.63223300 | 0.85286400  | -3.15026600 |
| C | -2.94663900 | 2.15826500  | -4.02481400 |
| H | -2.69227900 | 1.31434700  | -4.68554600 |
| C | -3.76111200 | 3.15730600  | -4.86636400 |
| H | -3.14034300 | 3.55841200  | -5.67502700 |
| H | -4.64288400 | 2.70275200  | -5.32722300 |
| H | -4.09879500 | 3.99747400  | -4.24842200 |
| C | -1.62749500 | 2.81771600  | -3.59641200 |
| H | -1.82174100 | 3.67925700  | -2.94630900 |
| H | -0.96635500 | 2.13915500  | -3.05505900 |
| H | -1.08917700 | 3.17630800  | -4.48044500 |
| C | -8.19246500 | 1.64104500  | -1.23781400 |
| H | -7.90332900 | 2.67276800  | -1.46339300 |

|   |             |             |             |
|---|-------------|-------------|-------------|
| H | -9.26883900 | 1.53611100  | -1.41748000 |
| H | -8.01212500 | 1.46943200  | -0.17026700 |
| C | -7.82799700 | -0.79963400 | -1.80231200 |
| H | -7.33644300 | -1.50687100 | -2.47827800 |
| H | -7.57983400 | -1.08631300 | -0.77377500 |
| H | -8.91113900 | -0.91228900 | -1.92696600 |
| C | 4.55315700  | -0.88301100 | -1.54740400 |
| H | 4.56485300  | -1.28459500 | -2.57208600 |
| C | 4.43109100  | -5.76863600 | -0.21044700 |
| H | 3.85087700  | -6.39422300 | 0.48112600  |
| C | 4.21648800  | -6.32692100 | -1.62500700 |
| H | 4.54118500  | -7.37248000 | -1.68074900 |
| H | 3.16321500  | -6.27739600 | -1.91713500 |
| H | 4.79482500  | -5.76149500 | -2.36543400 |
| C | 6.00954400  | -0.57142900 | -1.15552600 |
| H | 6.63557100  | -1.46926600 | -1.19306600 |
| H | 6.44411900  | 0.17876300  | -1.82692800 |
| H | 6.05107700  | -0.17810400 | -0.13303500 |
| C | 3.71581800  | 0.40191000  | -1.56309700 |
| H | 2.65698600  | 0.20862400  | -1.75988600 |
| H | 3.77394500  | 0.92924100  | -0.60411900 |
| H | 4.09491100  | 1.08744000  | -2.33012500 |
| C | 5.91018500  | -5.86953800 | 0.20061000  |
| H | 6.54162300  | -5.26757400 | -0.46341300 |
| H | 6.05963700  | -5.50515900 | 1.22233300  |
| H | 6.26008000  | -6.90734000 | 0.14859400  |

**S-Me<sub>2</sub>Ph-cat**

|   |             |             |            |
|---|-------------|-------------|------------|
| C | -2.63317100 | -2.19181100 | 1.69496800 |
| C | -3.19207500 | -0.91155400 | 1.86246400 |

|   |             |             |             |
|---|-------------|-------------|-------------|
| H | -1.42216800 | -3.46726500 | 0.46422900  |
| C | -1.86915000 | -2.48276600 | 0.57083300  |
| C | -2.96422900 | 0.08230700  | 0.89245600  |
| C | -2.23325800 | -0.27418300 | -0.25623500 |
| C | -1.67212000 | -1.54091900 | -0.44917200 |
| C | -3.51424200 | 1.46704200  | 1.00398500  |
| C | -3.21342800 | 2.34138400  | 2.06513000  |
| C | -4.30207900 | 1.96017000  | -0.04578000 |
| C | -2.26326200 | 2.02162900  | 3.19354500  |
| C | -3.74427000 | 3.64559400  | 2.06525300  |
| C | -4.78813000 | 3.27213500  | -0.10314900 |
| C | -2.82717100 | 2.41437000  | 4.58049500  |
| H | -1.34518500 | 2.60225300  | 3.02042500  |
| C | -3.41906500 | 4.52151400  | 3.24957400  |
| C | -4.52018700 | 4.09233700  | 1.00010000  |
| C | -3.63474700 | 3.73738000  | 4.55654300  |
| H | -3.46716000 | 1.60848600  | 4.95320700  |
| H | -2.37065800 | 4.85217400  | 3.19430000  |
| H | -4.90432700 | 5.10901900  | 1.00535200  |
| H | -4.70497900 | 3.51701500  | 4.64159700  |
| H | -4.03353700 | 5.42817700  | 3.23651400  |
| H | -3.37326700 | 4.36287200  | 5.41701000  |
| H | -1.98816700 | 2.49033000  | 5.28113100  |
| H | -1.95973000 | 0.97386700  | 3.18287400  |
| C | -4.09570400 | -0.74160400 | 3.06035800  |
| H | -4.41382100 | 0.29477400  | 3.18469900  |
| H | -5.01275000 | -1.31396400 | 2.85693700  |
| C | -3.47221700 | -1.28270700 | 4.37006900  |
| H | -4.28390000 | -1.46756500 | 5.08264200  |
| H | -2.84012000 | -0.50990700 | 4.81868800  |

|   |             |             |             |
|---|-------------|-------------|-------------|
| C | -2.63305400 | -2.56872100 | 4.16042400  |
| H | -2.83876500 | -3.29493700 | 4.95441600  |
| H | -1.56602600 | -2.32642300 | 4.22466300  |
| C | -2.88723000 | -3.20544900 | 2.78238600  |
| H | -3.92927500 | -3.55610700 | 2.73109700  |
| H | -2.25359300 | -4.08721900 | 2.63963600  |
| C | -0.94280900 | -1.91186900 | -1.68509600 |
| C | -1.16219100 | -3.16384200 | -2.25755200 |
| C | -0.01262200 | -1.04272300 | -2.28255400 |
| C | -0.47456600 | -3.57096900 | -3.40867400 |
| H | -1.88091400 | -3.83756000 | -1.80212300 |
| C | 0.67229000  | -1.41476500 | -3.43349800 |
| H | 0.16375600  | -0.07852400 | -1.82738500 |
| C | 0.43153300  | -2.68541700 | -3.98349000 |
| H | 0.98884200  | -2.97575800 | -4.86637700 |
| C | -5.38542900 | 3.80025600  | -1.35357200 |
| C | -4.93358500 | 5.03386200  | -1.84933100 |
| C | -6.28279600 | 3.04338300  | -2.12087100 |
| C | -5.32690900 | 5.48769100  | -3.10949700 |
| H | -4.23348900 | 5.60674900  | -1.25285800 |
| C | -6.66699300 | 3.45999800  | -3.39757300 |
| H | -6.65014100 | 2.10932900  | -1.72089600 |
| C | -6.16058500 | 4.67037200  | -3.87980900 |
| H | -6.46393700 | 5.01169400  | -4.86336300 |
| O | -2.07877100 | 0.68194200  | -1.27562900 |
| O | -4.54949200 | 1.10827800  | -1.12785200 |
| P | -3.36332200 | 0.94441400  | -2.22736800 |
| O | -3.73663500 | -0.02914600 | -3.26729900 |
| O | -2.94766300 | 2.42127500  | -2.71036900 |
| H | -3.64172000 | 2.81557600  | -3.26792300 |

|   |             |             |             |
|---|-------------|-------------|-------------|
| C | -4.85657300 | 6.82004700  | -3.71262600 |
| C | -7.55389200 | 2.59890200  | -4.30974000 |
| C | -6.60508700 | 1.77940900  | -5.21309200 |
| H | -5.92834600 | 1.17742300  | -4.59765700 |
| H | -7.16445900 | 1.09344400  | -5.85877000 |
| H | -5.99716100 | 2.43256600  | -5.84819800 |
| C | -8.42578100 | 1.60612300  | -3.50976700 |
| H | -7.81306500 | 0.85498400  | -3.00101900 |
| H | -9.03911900 | 2.11998700  | -2.76295800 |
| H | -9.09779400 | 1.08013700  | -4.19491700 |
| C | -4.22486700 | 7.75387200  | -2.65929500 |
| H | -3.97494600 | 8.71246200  | -3.12444500 |
| H | -4.91086500 | 7.95118500  | -1.83000200 |
| H | -3.30199600 | 7.32828900  | -2.25047400 |
| C | -3.78032300 | 6.49978700  | -4.77116800 |
| H | -2.95578000 | 5.95634500  | -4.29827500 |
| H | -4.17868900 | 5.87302700  | -5.57496700 |
| H | -3.37031900 | 7.41396400  | -5.21439800 |
| C | -0.77241000 | -4.96025400 | -3.99008100 |
| C | 1.65369900  | -0.47841200 | -4.15266700 |
| C | 0.96406400  | -0.00126900 | -5.44920300 |
| H | 0.00978900  | 0.47151600  | -5.19766000 |
| H | 1.57761000  | 0.73456100  | -5.98101300 |
| H | 0.75540500  | -0.83490400 | -6.12670400 |
| C | 1.99740600  | 0.77249700  | -3.31573100 |
| H | 1.11020000  | 1.39118400  | -3.14327700 |
| H | 2.42731200  | 0.50442000  | -2.34572700 |
| H | 2.73404300  | 1.37818300  | -3.85296300 |
| C | -2.18506500 | -4.91524800 | -4.61001200 |
| H | -2.43548900 | -5.86182600 | -5.10193900 |

|   |              |             |             |
|---|--------------|-------------|-------------|
| H | -2.95114700  | -4.69856700 | -3.85963400 |
| H | -2.22533400  | -4.12209500 | -5.36265800 |
| C | 0.22179400   | -5.35902500 | -5.10153400 |
| H | 0.00279700   | -6.37735200 | -5.43776300 |
| H | 0.13825400   | -4.69259300 | -5.96688500 |
| H | 1.25681900   | -5.33640700 | -4.74735600 |
| C | -6.08253000  | 7.52873400  | -4.31141400 |
| C | -7.20619800  | 7.73985400  | -3.49666300 |
| C | -6.14236300  | 7.96403600  | -5.63775500 |
| C | -8.34866000  | 8.36107500  | -3.98986300 |
| H | -7.19002700  | 7.38628500  | -2.46945800 |
| C | -7.29075300  | 8.58400600  | -6.13963900 |
| H | -5.29741100  | 7.81398700  | -6.30046900 |
| C | -8.39785900  | 8.78439100  | -5.32027700 |
| H | -9.20666600  | 8.50615900  | -3.33886500 |
| H | -7.31547800  | 8.90318400  | -7.17799900 |
| H | -9.29254300  | 9.25971500  | -5.71220200 |
| C | -8.48969600  | 3.51678900  | -5.11007200 |
| C | -9.26498800  | 4.46410800  | -4.42237900 |
| C | -8.60632100  | 3.46008800  | -6.50161800 |
| C | -10.11515200 | 5.33128300  | -5.10018800 |
| H | -9.17172700  | 4.54235200  | -3.34294400 |
| C | -9.46256700  | 4.32706100  | -7.18738800 |
| H | -8.02131100  | 2.74485900  | -7.06880900 |
| C | -10.21667500 | 5.26815600  | -6.49179400 |
| H | -10.68747400 | 6.06809900  | -4.54408300 |
| H | -9.52908200  | 4.26691400  | -8.27045100 |
| H | -10.87264700 | 5.95015300  | -7.02537800 |
| C | -0.65382800  | -5.99822600 | -2.86340300 |
| C | 0.50521500   | -6.00884700 | -2.07089700 |

|   |             |             |             |
|---|-------------|-------------|-------------|
| C | -1.63861800 | -6.95447300 | -2.59986900 |
| C | 0.67474400  | -6.94296000 | -1.05351000 |
| H | 1.27321500  | -5.26100300 | -2.24813900 |
| C | -1.47411000 | -7.89336400 | -1.57692100 |
| H | -2.54972000 | -6.97429400 | -3.18742100 |
| C | -0.31844700 | -7.89292200 | -0.80015000 |
| H | 1.58085500  | -6.92775000 | -0.45354900 |
| H | -2.25713800 | -8.62344600 | -1.38975200 |
| H | -0.19107300 | -8.62120700 | -0.00401600 |
| C | 2.96242200  | -1.23546800 | -4.42269500 |
| C | 3.58322400  | -1.91704600 | -3.36389100 |
| C | 3.58679400  | -1.25757000 | -5.67314600 |
| C | 4.78528400  | -2.59371700 | -3.54697700 |
| H | 3.10299200  | -1.92736500 | -2.38936700 |
| C | 4.79315800  | -1.93829600 | -5.86308100 |
| H | 3.13539900  | -0.74662500 | -6.51636300 |
| C | 5.39800900  | -2.60820200 | -4.80274900 |
| H | 5.24294600  | -3.11567200 | -2.71073300 |
| H | 5.25535700  | -1.94394100 | -6.84669400 |
| H | 6.33398300  | -3.13960100 | -4.95067300 |

**Me<sub>2</sub>Ph-R-TS2**

|   |             |             |            |
|---|-------------|-------------|------------|
| C | -0.29297800 | -3.60440500 | 3.80932500 |
| C | -1.18182900 | -2.54546700 | 3.55761700 |
| H | 1.56778200  | -4.51426200 | 3.36292800 |
| C | 0.91112400  | -3.68560800 | 3.12483100 |
| C | -0.81181000 | -1.54587800 | 2.64639500 |
| C | 0.39279800  | -1.69208800 | 1.92700000 |
| C | 1.28213800  | -2.77207800 | 2.11807600 |
| C | -1.69015500 | -0.36955600 | 2.36995100 |



|   |             |             |            |
|---|-------------|-------------|------------|
| C | -2.07375000 | 0.54133500  | 3.38135000 |
| C | -2.13221100 | -0.14864100 | 1.05946600 |
| C | -1.49308900 | 0.41920900  | 4.77938500 |
| C | -2.95697200 | 1.58908000  | 3.06434300 |
| C | -3.01787700 | 0.87781000  | 0.72739300 |
| C | -1.58917600 | 1.71931000  | 5.58195000 |
| H | -0.45357500 | 0.08179500  | 4.71092700 |
| C | -3.37832600 | 2.62819000  | 4.08967200 |
| C | -3.43071600 | 1.72393900  | 1.75466300 |
| C | -3.02112500 | 2.25321900  | 5.52965700 |
| H | -1.27342900 | 1.53699800  | 6.61573100 |
| H | -2.88668800 | 3.58015400  | 3.83998700 |
| H | -4.11823200 | 2.53299800  | 1.51871800 |
| H | -3.70762100 | 1.47689700  | 5.89601400 |
| H | -4.45569400 | 2.81536000  | 3.99643900 |
| H | -3.14634100 | 3.12382500  | 6.18376700 |
| H | -0.90348900 | 2.46925700  | 5.16433900 |
| H | -2.02568600 | -0.36299000 | 5.33532700 |
| C | -2.53903600 | -2.65379300 | 4.20684300 |
| H | -2.46041400 | -2.50183000 | 5.29310400 |
| H | -3.22011600 | -1.88857200 | 3.82708500 |
| C | -3.11178200 | -4.06268800 | 3.94144500 |
| H | -3.29946600 | -4.14855900 | 2.86467000 |
| H | -4.08338800 | -4.16163000 | 4.43818300 |
| C | -2.14905800 | -5.19265600 | 4.39767700 |
| H | -2.03357800 | -5.92282400 | 3.58910700 |
| H | -2.57033800 | -5.73565800 | 5.25105200 |
| C | -0.75034000 | -4.65630400 | 4.78637300 |
| H | -0.02884400 | -5.47821600 | 4.84427200 |
| H | -0.80810000 | -4.22025000 | 5.79400800 |

|   |             |             |             |
|---|-------------|-------------|-------------|
| C | 2.46875600  | -3.05040800 | 1.25384400  |
| C | 3.09727100  | -4.31330000 | 1.29789300  |
| C | 2.95779900  | -2.12162000 | 0.32019900  |
| C | 4.13109200  | -4.64986200 | 0.42553000  |
| H | 2.77118600  | -5.05185200 | 2.01642800  |
| C | 3.91965200  | -2.46726300 | -0.62959700 |
| H | 2.56360000  | -1.12314800 | 0.32077600  |
| C | 4.48943000  | -3.73781200 | -0.57163000 |
| H | 5.27037000  | -4.00329500 | -1.27573200 |
| C | -3.48350500 | 1.06982300  | -0.67649600 |
| C | -2.82461800 | 1.98071300  | -1.51132800 |
| C | -4.61107400 | 0.38505500  | -1.14555400 |
| C | -3.29235900 | 2.22337000  | -2.80581200 |
| H | -1.94792900 | 2.48634500  | -1.12780000 |
| C | -5.09240700 | 0.60274200  | -2.44149400 |
| H | -5.11897400 | -0.29667700 | -0.47326400 |
| C | -4.40905800 | 1.51118300  | -3.25222200 |
| H | -4.80451400 | 1.72607000  | -4.23918700 |
| C | -6.34036200 | -0.09363800 | -3.00608100 |
| C | -7.21518700 | -0.71563300 | -1.89702000 |
| H | -8.12558800 | -1.13058900 | -2.34112300 |
| H | -6.69055200 | -1.52842000 | -1.38509000 |
| H | -7.51231100 | 0.03223100  | -1.15529400 |
| C | -2.71428900 | 3.30909900  | -3.72816200 |
| C | -1.53861400 | 4.06300400  | -3.07500600 |
| H | -0.71805400 | 3.37651500  | -2.83942000 |
| H | -1.16320200 | 4.82437500  | -3.76607700 |
| H | -1.83576200 | 4.56939900  | -2.15234200 |
| C | 4.28712000  | -1.51623400 | -1.77897500 |
| C | 3.99245600  | -0.03688000 | -1.43930600 |

|   |             |             |             |
|---|-------------|-------------|-------------|
| H | 4.49287500  | 0.27109700  | -0.51550900 |
| H | 4.36572000  | 0.59816800  | -2.24960000 |
| H | 2.91903800  | 0.15170600  | -1.33467700 |
| C | 4.91779900  | -5.96928700 | 0.50939900  |
| C | 4.60846800  | -6.76464100 | 1.79443700  |
| H | 4.80116100  | -6.17377500 | 2.69471700  |
| H | 3.56388800  | -7.09579500 | 1.81554300  |
| H | 5.24294300  | -7.65559400 | 1.83503100  |
| O | 0.65418100  | -0.70785200 | 0.98508600  |
| O | -1.68254700 | -0.98381800 | 0.05166400  |
| P | -0.10731500 | -0.81306300 | -0.47670600 |
| O | 0.16763200  | -2.11584300 | -1.17141700 |
| O | 0.11550700  | 0.50587000  | -1.16209500 |
| H | -1.00608100 | -2.78136900 | -2.56972100 |
| C | -1.62080100 | -3.42437000 | -3.19296100 |
| S | -0.42177100 | -5.25033700 | -1.70920200 |
| O | -0.68160700 | -6.71308700 | -1.97204900 |
| C | 1.35325100  | -4.91309900 | -1.70555800 |
| H | 1.71043500  | -5.07365200 | -2.72279900 |
| H | 1.48056200  | -3.86951300 | -1.41663600 |
| H | 1.83750700  | -5.58892900 | -1.00083400 |
| C | -0.82448900 | -4.85863000 | 0.01732700  |
| H | -0.23939700 | -5.50849800 | 0.67235400  |
| H | -0.58268500 | -3.80802300 | 0.17940500  |
| H | -1.89252700 | -5.04192200 | 0.14958800  |
| C | -1.07680200 | -1.24972000 | -5.62433900 |
| C | -0.14262300 | -0.47427500 | -4.88356400 |
| C | 1.10423300  | -0.12017600 | -5.39197500 |
| C | 1.41309000  | -0.55261000 | -6.67977600 |
| C | 0.49917700  | -1.30924000 | -7.43757700 |

|   |             |             |             |
|---|-------------|-------------|-------------|
| C | -0.74428900 | -1.66190800 | -6.92263200 |
| C | -2.20610700 | -1.46485100 | -4.75965300 |
| C | -1.93959000 | -0.75249700 | -3.57897000 |
| H | 1.80526700  | 0.46289800  | -4.80379100 |
| H | 2.37742400  | -0.29763500 | -7.10885900 |
| H | 0.77132100  | -1.61767900 | -8.44278100 |
| H | -1.44769700 | -2.24162100 | -7.51362400 |
| H | -3.14499700 | -1.93139600 | -5.01370400 |
| H | -2.54421000 | -0.64037800 | -2.69205200 |
| N | -0.72071000 | -0.17913700 | -3.65532900 |
| H | -0.26260700 | 0.24166600  | -2.82398300 |
| C | -0.86813000 | -3.94832400 | -4.36829000 |
| O | 0.33743500  | -3.83089400 | -4.46304800 |
| O | -1.62454700 | -4.57427800 | -5.29130400 |
| C | -0.88099900 | -5.18039400 | -6.36668600 |
| H | -1.63303300 | -5.57917300 | -7.04722600 |
| H | -0.25781700 | -4.43377100 | -6.86022600 |
| H | -0.25100700 | -5.98302300 | -5.97524900 |
| C | -2.95909300 | -3.74327600 | -2.73890000 |
| C | -3.83706300 | -4.63432500 | -3.39195200 |
| C | -3.37122000 | -3.15330500 | -1.52113500 |
| C | -5.08230200 | -4.91747400 | -2.84093100 |
| H | -3.53111600 | -5.09993800 | -4.31824600 |
| C | -4.61219700 | -3.45235500 | -0.97491300 |
| H | -2.70602700 | -2.46889700 | -1.00700500 |
| C | -5.47459200 | -4.33425100 | -1.63325700 |
| H | -5.74903400 | -5.60514100 | -3.35241200 |
| H | -4.90608100 | -2.99443100 | -0.03498900 |
| H | -6.44738000 | -4.56457300 | -1.20864600 |
| C | -7.19453800 | 0.94638400  | -3.75031100 |

|   |             |             |             |
|---|-------------|-------------|-------------|
| C | -7.73533200 | 0.71463600  | -5.01830600 |
| C | -7.45670100 | 2.18266600  | -3.13869100 |
| C | -8.50474100 | 1.68878300  | -5.66148600 |
| H | -7.55300700 | -0.22608000 | -5.52605300 |
| C | -8.21600200 | 3.15753100  | -3.77707100 |
| H | -7.02403400 | 2.39609800  | -2.16599900 |
| C | -8.74417300 | 2.91503200  | -5.04705000 |
| H | -8.90655300 | 1.48596900  | -6.65075300 |
| H | -8.37560200 | 4.11587300  | -3.29256700 |
| H | -9.32898500 | 3.67826900  | -5.55268800 |
| C | -3.86203100 | 4.30113300  | -3.99819800 |
| C | -4.32389600 | 4.60523400  | -5.28166600 |
| C | -4.50687500 | 4.90614000  | -2.90736200 |
| C | -5.39421500 | 5.48422800  | -5.47265600 |
| H | -3.86052000 | 4.15043900  | -6.14975900 |
| C | -5.56675300 | 5.78800400  | -3.09223000 |
| H | -4.18559100 | 4.66046900  | -1.89904800 |
| C | -6.01880000 | 6.08127300  | -4.38150100 |
| H | -5.73898000 | 5.69515600  | -6.48135600 |
| H | -6.04700200 | 6.24162300  | -2.22903800 |
| H | -6.85156400 | 6.76313200  | -4.52986300 |
| C | 6.41320600  | -5.60296800 | 0.51731100  |
| C | 7.33352200  | -6.11707400 | -0.39967500 |
| C | 6.87894000  | -4.68885600 | 1.47601500  |
| C | 8.67638200  | -5.72883000 | -0.36574200 |
| H | 7.01209800  | -6.81712700 | -1.16259700 |
| C | 8.21524600  | -4.30535700 | 1.51873900  |
| H | 6.17414900  | -4.25338000 | 2.17873600  |
| C | 9.12370900  | -4.82372000 | 0.59218000  |
| H | 9.36864300  | -6.13462600 | -1.09844000 |

|   |             |             |             |
|---|-------------|-------------|-------------|
| H | 8.54731000  | -3.59265900 | 2.26907100  |
| H | 10.16612600 | -4.51861600 | 0.61550900  |
| C | 5.78524300  | -1.64549700 | -2.08674600 |
| C | 6.28207100  | -1.83577600 | -3.37941100 |
| C | 6.70931400  | -1.56832200 | -1.03226100 |
| C | 7.65565600  | -1.95232400 | -3.61304500 |
| H | 5.59901300  | -1.90676100 | -4.21862400 |
| C | 8.07637200  | -1.69111000 | -1.25792200 |
| H | 6.34432700  | -1.44755000 | -0.01654600 |
| C | 8.55807700  | -1.88496800 | -2.55467200 |
| H | 8.01485500  | -2.10621600 | -4.62738900 |
| H | 8.76494000  | -1.65422800 | -0.41889300 |
| H | 9.62465600  | -1.98891900 | -2.73402900 |
| C | 3.39303000  | -1.91118300 | -2.97718300 |
| H | 2.34021900  | -1.86445700 | -2.68500000 |
| H | 3.53822900  | -1.23186800 | -3.82456500 |
| H | 3.60202900  | -2.93093600 | -3.31659700 |
| C | 4.53747200  | -6.85512800 | -0.69396200 |
| H | 5.08528900  | -7.80368700 | -0.67888500 |
| H | 3.46949500  | -7.09129100 | -0.65468400 |
| H | 4.73516100  | -6.35532100 | -1.64681500 |
| C | -5.85995500 | -1.23033100 | -3.93345000 |
| H | -5.30693300 | -0.83333600 | -4.79043800 |
| H | -5.19790400 | -1.89930100 | -3.37861300 |
| H | -6.69883500 | -1.82814300 | -4.30621700 |
| C | -2.18533000 | 2.65841000  | -5.02147400 |
| H | -1.80254300 | 3.41815300  | -5.71130700 |
| H | -1.36538800 | 1.97955400  | -4.78195900 |
| H | -2.95447200 | 2.07925500  | -5.54050500 |

**Me<sub>2</sub>Ph-S-TS2**

|   |             |             |            |
|---|-------------|-------------|------------|
| C | 0.46994500  | -3.13018300 | 4.10403900 |
| C | -0.55623500 | -2.19536400 | 3.87238700 |
| H | 2.37102400  | -3.89158100 | 3.48938600 |
| C | 1.58947100  | -3.16710500 | 3.27955000 |
| C | -0.42602600 | -1.27418600 | 2.81870100 |
| C | 0.70201100  | -1.37283300 | 1.98156500 |
| C | 1.72844000  | -2.31589400 | 2.17094300 |
| C | -1.43467400 | -0.21245400 | 2.51837200 |
| C | -1.76779600 | 0.79283200  | 3.45827900 |
| C | -1.98963100 | -0.14207700 | 1.23034900 |
| C | -1.05292700 | 0.86057000  | 4.79685200 |
| C | -2.71078500 | 1.77735100  | 3.11185400 |
| C | -2.89856200 | 0.85090800  | 0.86089600 |
| C | -1.11026000 | 2.25159600  | 5.43320400 |
| H | -0.01499600 | 0.53569800  | 4.66956200 |
| C | -3.09048700 | 2.90757000  | 4.05461600 |
| C | -3.26626200 | 1.78222600  | 1.82874400 |
| C | -2.56069000 | 2.73260500  | 5.47958000 |
| H | -0.67454100 | 2.21352700  | 6.43842100 |
| H | -2.69399200 | 3.84674400  | 3.64176000 |
| H | -3.96595300 | 2.56857200  | 1.55514400 |
| H | -3.16677900 | 1.98991900  | 6.01737100 |
| H | -4.18200100 | 3.02299600  | 4.06221400 |
| H | -2.65211200 | 3.67628000  | 6.02973600 |
| H | -0.50675300 | 2.95813300  | 4.84714200 |
| H | -1.50651900 | 0.15145400  | 5.50033400 |
| C | -1.76701600 | -2.30765900 | 4.76533300 |
| H | -1.50388600 | -1.96404500 | 5.77590800 |
| H | -2.57478700 | -1.66075700 | 4.41441700 |

|   |             |             |             |
|---|-------------|-------------|-------------|
| C | -2.26493600 | -3.76783500 | 4.86830400  |
| H | -2.81553300 | -4.01310700 | 3.95406600  |
| H | -2.98991500 | -3.82946900 | 5.68728800  |
| C | -1.11747300 | -4.79248700 | 5.08232500  |
| H | -1.06629500 | -5.47678000 | 4.22681500  |
| H | -1.31542200 | -5.41436900 | 5.96218100  |
| C | 0.25798200  | -4.10884300 | 5.23085300  |
| H | 1.05682400  | -4.85798600 | 5.25079300  |
| H | 0.29465800  | -3.58441600 | 6.19703500  |
| C | 2.83516600  | -2.49726600 | 1.19393400  |
| C | 3.40950600  | -3.76030700 | 1.00374400  |
| C | 3.27737100  | -1.44387500 | 0.37746600  |
| C | 4.38677600  | -3.98531600 | 0.02667000  |
| H | 3.06454300  | -4.60142700 | 1.59526000  |
| C | 4.17458500  | -1.65549000 | -0.66568200 |
| H | 2.87576000  | -0.45614500 | 0.52769300  |
| C | 4.73745200  | -2.93127900 | -0.82007200 |
| H | 5.44912500  | -3.10366000 | -1.61710100 |
| C | -3.35237700 | 0.97914700  | -0.55329500 |
| C | -2.59931400 | 1.76670300  | -1.42009500 |
| C | -4.52436800 | 0.36576600  | -1.01589400 |
| C | -2.99848300 | 1.97294500  | -2.74706700 |
| H | -1.69406200 | 2.23169800  | -1.05098300 |
| C | -4.94149900 | 0.54045900  | -2.33618800 |
| H | -5.10421800 | -0.23200300 | -0.32190100 |
| C | -4.16208500 | 1.34255500  | -3.18737400 |
| H | -4.50790300 | 1.49524400  | -4.20324000 |
| O | 0.74493000  | -0.51283700 | 0.89379400  |
| O | -1.62897000 | -1.07867100 | 0.27324200  |
| P | -0.11742500 | -0.99483800 | -0.42301900 |



|   |             |             |             |
|---|-------------|-------------|-------------|
| O | 0.18035200  | -2.41896900 | -0.79916200 |
| O | -0.01542000 | 0.10274300  | -1.44574100 |
| H | -1.25609700 | -3.39501100 | -1.83236200 |
| C | -1.49697100 | -4.23607700 | -2.47052300 |
| S | -1.22613200 | -5.43444200 | -0.09753100 |
| O | -1.71386600 | -6.82844600 | 0.20571800  |
| C | 0.49492100  | -5.23092200 | 0.40954300  |
| H | 1.09229500  | -5.93937200 | -0.15852600 |
| H | 0.77194100  | -4.20134900 | 0.17641400  |
| H | 0.56506800  | -5.43459000 | 1.48081900  |
| C | -1.98884800 | -4.26116600 | 1.05815700  |
| H | -1.68310500 | -4.53301300 | 2.07029100  |
| H | -1.65681400 | -3.25359700 | 0.80452900  |
| H | -3.06959500 | -4.34646300 | 0.94403100  |
| C | -1.44277000 | -2.50370100 | -5.46046900 |
| C | -0.47745200 | -1.62259400 | -4.88120300 |
| C | 0.72513800  | -1.31078400 | -5.51732600 |
| C | 0.97360600  | -1.92288200 | -6.74050900 |
| C | 0.04491400  | -2.81348900 | -7.32400800 |
| C | -1.15710900 | -3.10686300 | -6.69940200 |
| C | -2.53232400 | -2.57280900 | -4.54357600 |
| C | -2.20462300 | -1.74722700 | -3.46364600 |
| H | 1.43965800  | -0.63227300 | -5.06313700 |
| H | 1.90233500  | -1.70909600 | -7.26176800 |
| H | 0.28039900  | -3.27112100 | -8.28036700 |
| H | -1.86804700 | -3.79100300 | -7.15357900 |
| H | -3.45461100 | -3.11979900 | -4.66921700 |
| H | -2.76889500 | -1.50436100 | -2.57453600 |
| N | -0.98363900 | -1.18868100 | -3.67080400 |
| H | -0.51424000 | -0.60102800 | -2.96219400 |

|   |             |             |             |
|---|-------------|-------------|-------------|
| C | -2.90474200 | -4.71221300 | -2.47809900 |
| O | -3.36012300 | -5.63999400 | -3.11629200 |
| O | -3.64916200 | -3.96370700 | -1.62934100 |
| C | -5.01497600 | -4.38734000 | -1.48238800 |
| H | -5.53813800 | -4.33205700 | -2.43974800 |
| H | -5.05260200 | -5.41362700 | -1.10882100 |
| H | -5.45468000 | -3.69392100 | -0.76592500 |
| C | -0.46889500 | -4.70086000 | -3.33959400 |
| C | 0.77333200  | -4.01614700 | -3.29571300 |
| C | -0.65268000 | -5.73844700 | -4.29192300 |
| C | 1.77522200  | -4.33175200 | -4.20374800 |
| H | 0.91635900  | -3.25105700 | -2.54003900 |
| C | 0.36327300  | -6.04758600 | -5.17949100 |
| H | -1.59846200 | -6.26287700 | -4.32010900 |
| C | 1.57327200  | -5.33712000 | -5.14859200 |
| H | 2.71089900  | -3.78309800 | -4.18048300 |
| H | 0.21692400  | -6.83409600 | -5.91360100 |
| H | 2.35659200  | -5.57634000 | -5.86213100 |
| C | -6.21276800 | -0.11581400 | -2.89974700 |
| C | -2.14083200 | 2.87478900  | -3.65360900 |
| C | -2.93619400 | 3.39806700  | -4.86968200 |
| H | -2.31994800 | 4.10685100  | -5.43176400 |
| H | -3.20665700 | 2.58105600  | -5.54681800 |
| H | -3.85568300 | 3.90948100  | -4.56976000 |
| C | -7.12654300 | -0.67972900 | -1.79015700 |
| H | -6.63485600 | -1.49234700 | -1.24382300 |
| H | -7.41415700 | 0.09249600  | -1.07074200 |
| H | -8.04107700 | -1.08057500 | -2.23850300 |
| C | 4.39644600  | -0.54846800 | -1.71554800 |
| C | 5.01776300  | -5.38621000 | -0.07953400 |

|   |             |             |             |
|---|-------------|-------------|-------------|
| C | 5.70933200  | -5.70195500 | 1.26359100  |
| H | 6.19050900  | -6.68605000 | 1.23768000  |
| H | 6.48028100  | -4.95018300 | 1.45879600  |
| H | 5.01131800  | -5.68204900 | 2.10498300  |
| C | 5.82107600  | -0.59228300 | -2.31159000 |
| H | 5.97221800  | -1.49815500 | -2.90713100 |
| H | 5.97548200  | 0.26736100  | -2.97141200 |
| H | 6.59409600  | -0.57348200 | -1.53841200 |
| C | -0.95770900 | 2.04191400  | -4.18612000 |
| H | -0.35047200 | 1.64700100  | -3.36798400 |
| H | -1.33818800 | 1.19643400  | -4.76448400 |
| H | -0.32182400 | 2.64356200  | -4.84564900 |
| C | -5.77833000 | -1.29692800 | -3.79141500 |
| H | -5.15413300 | -0.96813700 | -4.62695500 |
| H | -5.18760600 | -1.99683900 | -3.19387800 |
| H | -6.64317700 | -1.83954400 | -4.18991800 |
| C | 3.40043800  | -0.84638800 | -2.86478000 |
| H | 3.65439400  | -1.80681400 | -3.32564600 |
| H | 2.37197000  | -0.91401500 | -2.50257800 |
| H | 3.45360600  | -0.06893900 | -3.63650000 |
| C | 6.10582900  | -5.46341400 | -1.17155500 |
| H | 5.71238600  | -5.24738200 | -2.16851100 |
| H | 6.91838100  | -4.75896600 | -0.96354000 |
| H | 6.52640700  | -6.47366900 | -1.19501700 |
| C | -1.66480600 | 4.08362400  | -2.83271900 |
| C | -0.31351600 | 4.37424200  | -2.61967600 |
| C | -2.61930100 | 4.93221400  | -2.25073600 |
| C | 0.07441200  | 5.47765600  | -1.85339900 |
| H | 0.45596400  | 3.73528000  | -3.03656300 |
| C | -2.23872400 | 6.03459200  | -1.49112500 |

|   |             |             |             |
|---|-------------|-------------|-------------|
| H | -3.67496500 | 4.70883200  | -2.37814500 |
| C | -0.88482200 | 6.31379300  | -1.28781300 |
| H | 1.13235100  | 5.67319500  | -1.69951400 |
| H | -2.99935500 | 6.67370500  | -1.05032000 |
| H | -0.58461300 | 7.17040200  | -0.69075100 |
| C | -7.01991000 | 0.93820400  | -3.67255200 |
| C | -7.48437100 | 0.74032900  | -4.97574100 |
| C | -7.32916200 | 2.15244600  | -3.03930000 |
| C | -8.23575000 | 1.72241900  | -5.62852600 |
| H | -7.25978100 | -0.18094500 | -5.50160700 |
| C | -8.07895900 | 3.13151000  | -3.68333500 |
| H | -6.95631300 | 2.33454600  | -2.03527700 |
| C | -8.53743200 | 2.92031300  | -4.98646200 |
| H | -8.58021900 | 1.54563600  | -6.64393100 |
| H | -8.30128700 | 4.06392700  | -3.17133100 |
| H | -9.11867600 | 3.68479100  | -5.49426800 |
| C | 3.91744300  | -6.40316600 | -0.42702700 |
| C | 3.23171200  | -6.27446500 | -1.64504800 |
| C | 3.56144900  | -7.46359000 | 0.41305000  |
| C | 2.24125800  | -7.17848300 | -2.01986000 |
| H | 3.45741600  | -5.43741300 | -2.29713800 |
| C | 2.55815000  | -8.36728400 | 0.04891300  |
| H | 4.06208500  | -7.59576500 | 1.36566500  |
| C | 1.89692900  | -8.23327900 | -1.16962400 |
| H | 1.72302700  | -7.04696100 | -2.96359500 |
| H | 2.29299800  | -9.17426800 | 0.72632900  |
| H | 1.10878100  | -8.92673900 | -1.44681900 |
| C | 4.13201400  | 0.83622500  | -1.10198200 |
| C | 2.90166900  | 1.48981200  | -1.25204600 |
| C | 5.11049800  | 1.45692600  | -0.31130400 |

|   |            |            |             |
|---|------------|------------|-------------|
| C | 2.65915200 | 2.72174600 | -0.64105700 |
| H | 2.09104600 | 1.02752500 | -1.79894900 |
| C | 4.87729800 | 2.69255800 | 0.29006200  |
| H | 6.06499500 | 0.96656700 | -0.14812700 |
| C | 3.64824900 | 3.33398900 | 0.12570600  |
| H | 1.68414500 | 3.18641200 | -0.75715100 |
| H | 5.65584900 | 3.15026600 | 0.89497700  |
| H | 3.46144600 | 4.29273000 | 0.60222500  |

### IX. The Stereochemistry of Product

The absolute stereochemistry of the **3ai** and (*R*)-**HA-10** were determined by X-ray crystallography. The suitable crystals were selected and mounted on a suitable support on a Bruker D8 VENTURE diffractometer.

The single crystal of compound **3ai** was obtained by slow evaporation of its solution in hexanes/DCM/EtOAc (20:1:1) at 0 °C. X-ray crystal structure was determined at 170 K with the ellipsoid contour at 50% probability levels. The X-ray data have been deposited at the Cambridge Crystallographic Data Center (CCDC: 2307251)

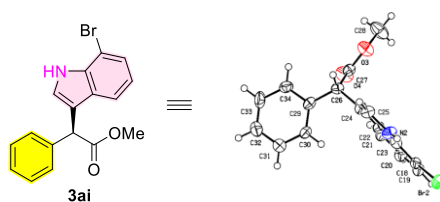

**Table S6 Crystal Data and Structure Refinement for 3ai.**

|                     |                                                   |
|---------------------|---------------------------------------------------|
| Identification code | <b>3ai</b>                                        |
| Empirical formula   | C <sub>17</sub> H <sub>14</sub> BrNO <sub>2</sub> |
| Formula weight      | 344.20                                            |
| Temperature/K       | 170                                               |
| Crystal system      | monoclinic                                        |
| Space group         | P21                                               |
| a/Å                 | 8.1154(11)                                        |

|                                                |                                                               |
|------------------------------------------------|---------------------------------------------------------------|
| b/Å                                            | 10.5749(13)                                                   |
| c/Å                                            | 17.941(2)                                                     |
| $\alpha/^\circ$                                | 90                                                            |
| $\beta/^\circ$                                 | 92.885(4)                                                     |
| $\gamma/^\circ$                                | 90                                                            |
| Volume/Å <sup>3</sup>                          | 1537.8(3)                                                     |
| Z                                              | 4                                                             |
| $\rho_{\text{calc}}/\text{cm}^3$               | 1.487                                                         |
| $\mu/\text{mm}^{-1}$                           | 2.676                                                         |
| F(000)                                         | 696.0                                                         |
| Crystal size/mm <sup>3</sup>                   | 0.15 × 0.08 × 0.05                                            |
| Radiation                                      | MoK $\alpha$ ( $\lambda = 0.71073$ )                          |
| 2 $\Theta$ range for data collection/ $^\circ$ | 4.472 to 52.93                                                |
| Index ranges                                   | -8 ≤ h ≤ 10, -13 ≤ k ≤ 12, -22 ≤ l ≤ 22                       |
| Reflections collected                          | 15202                                                         |
| Independent reflections                        | 5800 [R <sub>int</sub> = 0.0707, R <sub>sigma</sub> = 0.1025] |
| Data/restraints/parameters                     | 5800/1/381                                                    |
| Goodness-of-fit on F <sup>2</sup>              | 0.990                                                         |
| Final R indexes [ $I \geq 2\sigma(I)$ ]        | R <sub>1</sub> = 0.0479, wR <sub>2</sub> = 0.0874             |
| Final R indexes [all data]                     | R <sub>1</sub> = 0.0986, wR <sub>2</sub> = 0.1056             |
| Largest diff. peak/hole / e Å <sup>-3</sup>    | 0.29/-0.57                                                    |
| Flack parameter                                | 0.024(11)                                                     |

The single crystal of compound (*R*)-**HA-10** was obtained by slow evaporation of its solution in DCM/CH<sub>3</sub>CN (1:3) at 0 °C. X-ray crystal structure was determined at 100 K with the ellipsoid contour at 50% probability levels. The X-ray data have been deposited at the Cambridge Crystallographic Data Center (CCDC: 2330415).

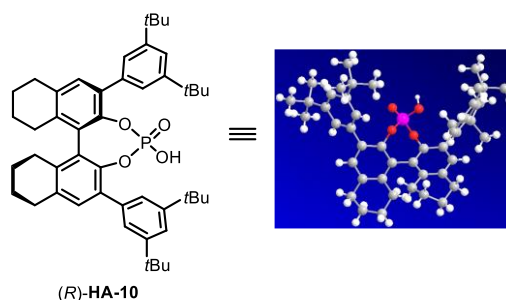

**Table S7 Crystal Data and Structure Refinement for (R)-HA-10.**

|                                             |                                                               |
|---------------------------------------------|---------------------------------------------------------------|
| Identification code                         | (R)-HA-10                                                     |
| Empirical formula                           | C <sub>48</sub> H <sub>61</sub> O <sub>4</sub> P              |
| Formula weight                              | 732.93                                                        |
| Temperature/K                               | 100.00                                                        |
| Crystal system                              | monoclinic                                                    |
| Space group                                 | C2                                                            |
| a/Å                                         | 22.3569(8)                                                    |
| b/Å                                         | 15.3432(8)                                                    |
| c/Å                                         | 13.0072(5)                                                    |
| α/°                                         | 90                                                            |
| β/°                                         | 101.568(2)                                                    |
| γ/°                                         | 90                                                            |
| Volume/Å <sup>3</sup>                       | 4371.2(3)                                                     |
| Z                                           | 4                                                             |
| ρ <sub>calc</sub> /cm <sup>3</sup>          | 1.114                                                         |
| μ/mm <sup>-1</sup>                          | 0.103                                                         |
| F(000)                                      | 1584.0                                                        |
| Crystal size/mm <sup>3</sup>                | 0.12 × 0.08 × 0.05                                            |
| Radiation                                   | MoKα (λ = 0.71073)                                            |
| 2θ range for data collection/°              | 4.282 to 52.812                                               |
| Index ranges                                | -27 ≤ h ≤ 27, -19 ≤ k ≤ 19, -16 ≤ l ≤ 16                      |
| Reflections collected                       | 25471                                                         |
| Independent reflections                     | 8593 [R <sub>int</sub> = 0.0712, R <sub>sigma</sub> = 0.0732] |
| Data/restraints/parameters                  | 8593/1/510                                                    |
| Goodness-of-fit on F <sup>2</sup>           | 1.035                                                         |
| Final R indexes [I ≥ 2σ (I)]                | R <sub>1</sub> = 0.0527, wR <sub>2</sub> = 0.1193             |
| Final R indexes [all data]                  | R <sub>1</sub> = 0.0707, wR <sub>2</sub> = 0.1320             |
| Largest diff. peak/hole / e Å <sup>-3</sup> | 0.27/-0.31                                                    |
| Flack parameter                             | 0.09(7)                                                       |

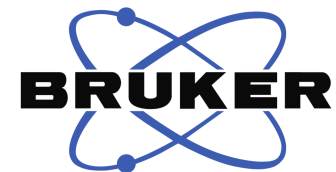

Current Data Parameters  
NAME HNMR-YX-5-p27  
EXPNO 1055  
PROCNO 1

F2 - Acquisition Parameters  
Date\_ 20230711  
Time 20.49  
INSTRUM spect  
PROBHD 5 mm PABBO BB-  
PULPROG zg30  
TD 65536  
SOLVENT CDCl3  
NS 16  
DS 2  
SWH 6009.615 Hz  
FIDRES 0.091699 Hz  
AQ 5.4525952 sec  
RG 128  
DW 83.200 usec  
DE 6.50 usec  
TE 300.1 K  
D1 1.00000000 sec  
TD0 1

==== CHANNEL f1 =====  
SFO1 300.1318534 MHz  
NUC1 1H  
P1 10.00 usec  
PLW1 14.00000000 W

F2 - Processing parameters  
SI 65536  
SF 300.1300436 MHz  
WDW EM  
SSB 0  
LB 0.30 Hz  
GB 0  
PC 1.00

8.028  
7.371  
7.344  
7.316  
7.240  
7.219  
7.193  
7.158  
7.135  
7.100  
7.076  
7.050  
7.020  
7.015  
6.998  
6.972  
6.948  
5.181

— 3.649

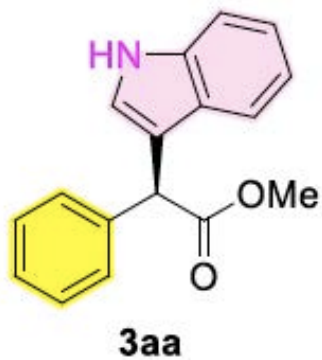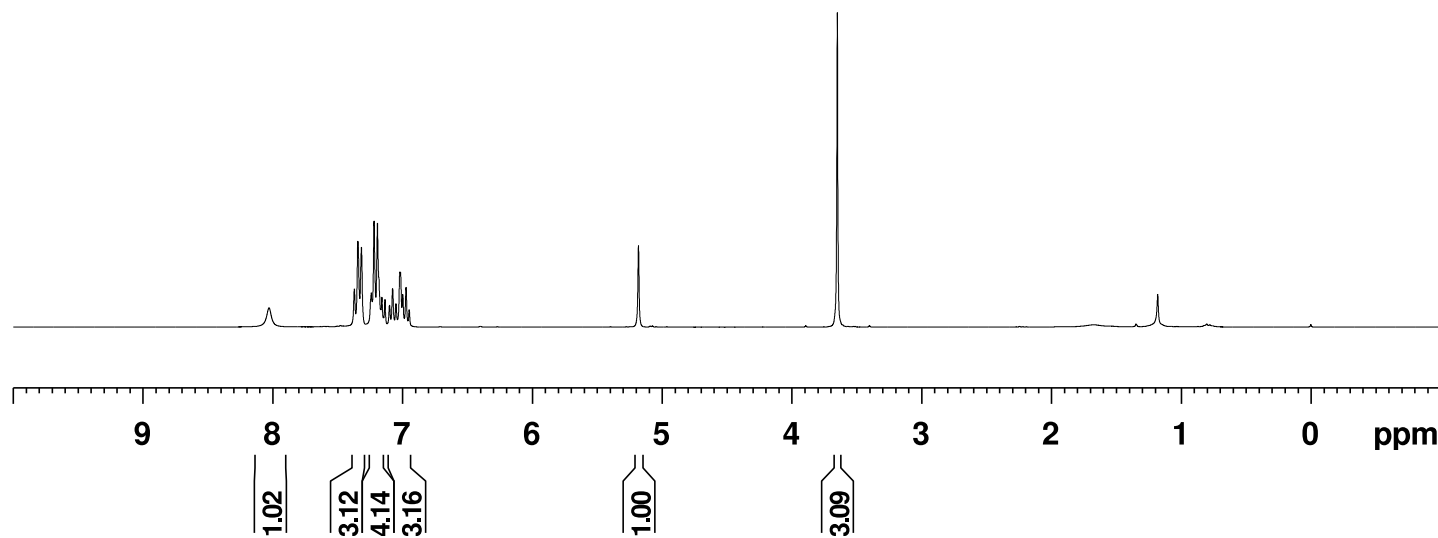



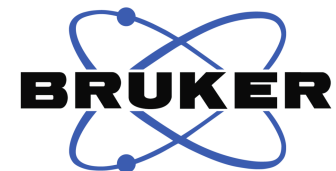

Current Data Parameters  
NAME CNMR-YX-5-p27  
EXPNO 1061  
PROCNO 1

F2 - Acquisition Parameters  
Date\_ 20230712  
Time 1.46  
INSTRUM spect  
PROBHD 5 mm PABBO BB-  
PULPROG zgpg30  
TD 65536  
SOLVENT CDCl3  
NS 100  
DS 4  
SWH 18028.846 Hz  
FIDRES 0.275098 Hz  
AQ 1.8175317 sec  
RG 203  
DW 27.733 usec  
DE 6.50 usec  
TE 300.7 K  
D1 2.00000000 sec  
D11 0.03000000 sec  
TD0 1

==== CHANNEL f1 =====  
SFO1 75.4752949 MHz  
NUC1 13C  
P1 9.50 usec  
PLW1 34.20000076 W

==== CHANNEL f2 =====  
SFO2 300.1312005 MHz  
NUC2 1H  
CPDPRG[2] waltz16  
PCPD2 90.00 usec  
PLW2 14.00000000 W  
PLW12 0.17284000 W  
PLW13 0.14000000 W

F2 - Processing parameters  
SI 32768  
SF 75.4677485 MHz  
WDW EM  
SSB 0  
LB 1.00 Hz  
GB 0  
PC 1.40

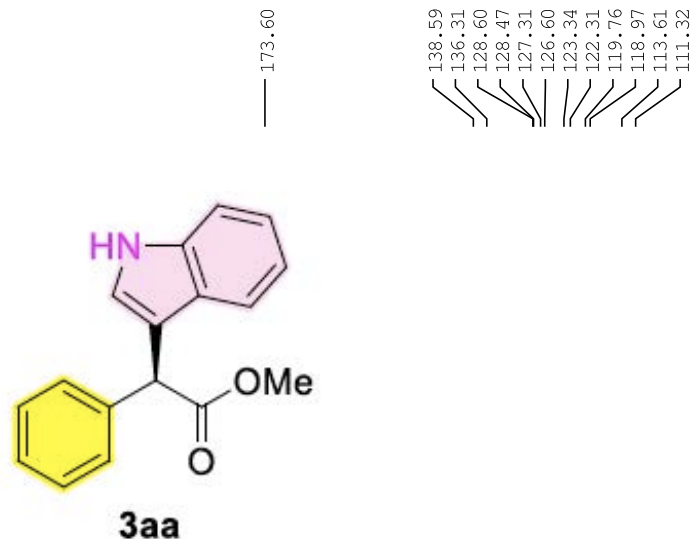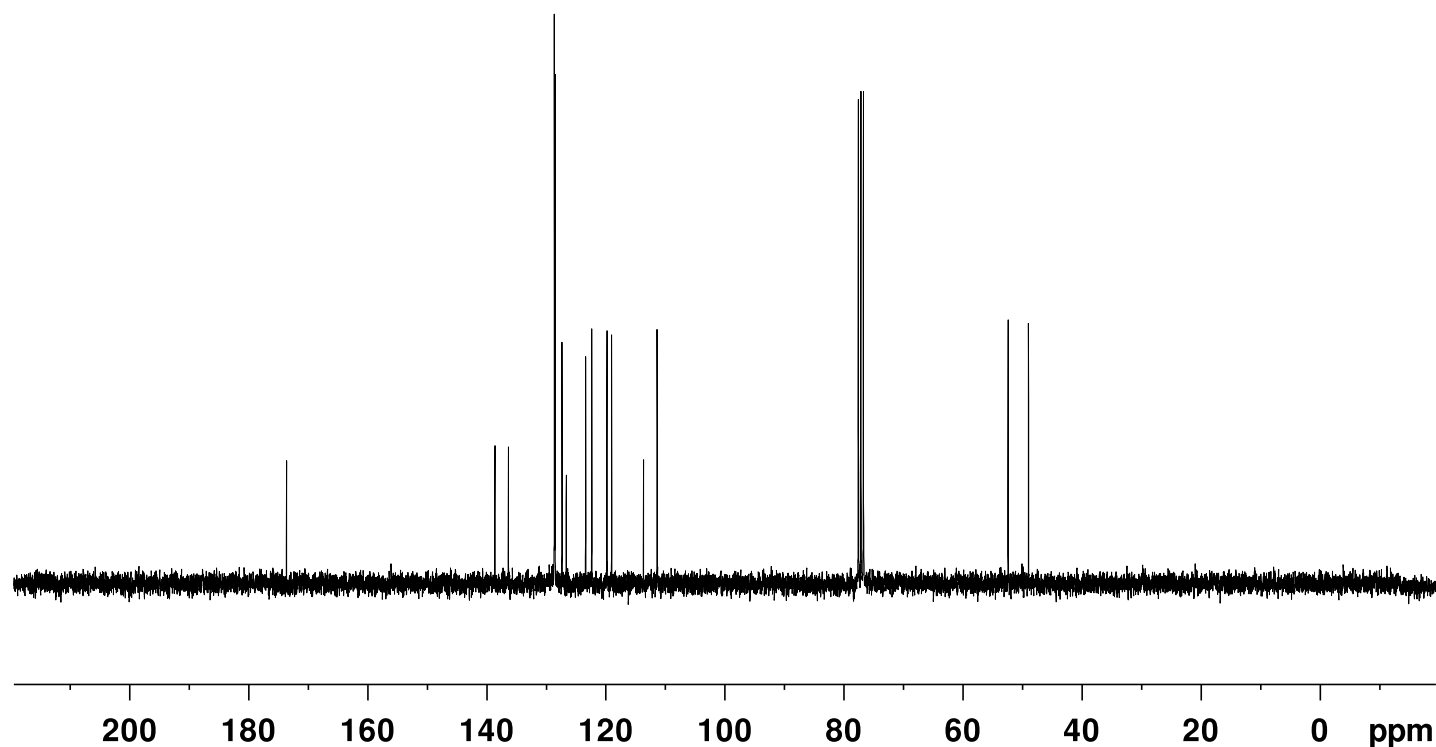



Current Data Parameters  
NAME HNMR-YX-6-p51  
EXPNO 1  
PROCNO 1

F2 - Acquisition Parameters  
Date\_ 20231019  
Time 2.45 h  
INSTRUM Avance  
PROBHD Z116098\_0833 (  
PULPROG zg30  
TD 65536  
SOLVENT CDCl3  
NS 16  
DS 2  
SWH 8196.722 Hz  
FIDRES 0.250144 Hz  
AQ 3.9976959 sec  
RG 101  
DW 61.000 usec  
DE 13.54 usec  
TE 293.6 K  
D1 1.00000000 sec  
TD0 1  
SF01 400.1324708 MHz  
NUC1 1H  
P0 3.33 usec  
P1 10.00 usec  
PLW1 20.73200035 W

F2 - Processing parameters  
SI 65536  
SF 400.1300175 MHz  
WDW EM  
SSB 0  
LB 0.30 Hz  
GB 0  
PC 1.00

7.353  
7.342  
7.323  
7.313  
7.305  
7.292  
7.284  
7.280  
7.241  
7.229  
7.220  
7.210  
7.135  
7.114  
6.948  
6.937  
6.917  
6.898  
6.753  
6.747  
5.943  
— 3.750

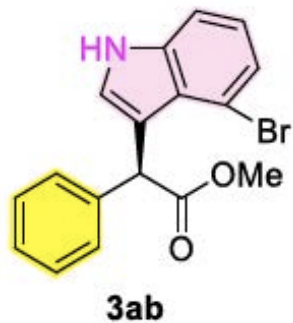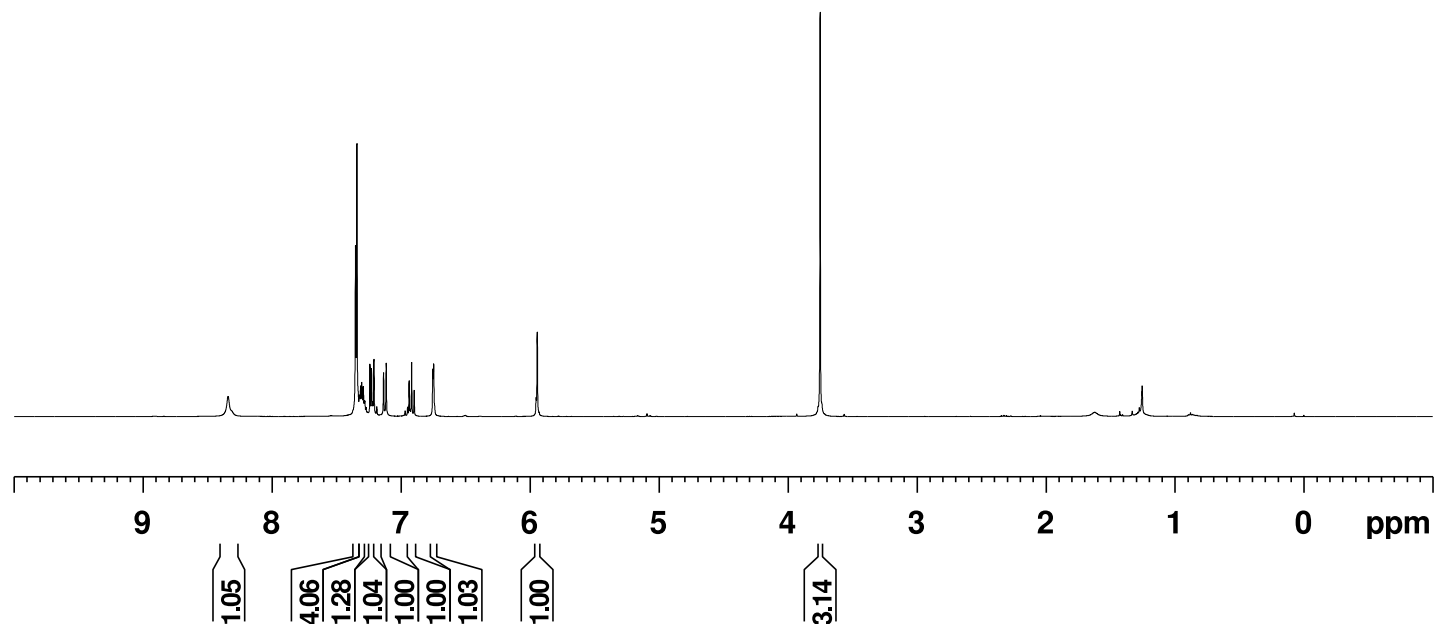



Current Data Parameters  
NAME CNMR-YX-6-p51  
EXPNO 2  
PROCNO 1

F2 - Acquisition Parameters  
Date\_ 20231019  
Time 2.52 h  
INSTRUM Avance  
PROBHD Z116098\_0833 (  
PULPROG zgpg30  
TD 65536  
SOLVENT CDCl3  
NS 100  
DS 4  
SWH 23809.523 Hz  
FIDRES 0.726609 Hz  
AQ 1.3762560 sec  
RG 46.0295  
DW 21.000 usec  
DE 6.50 usec  
TE 294.3 K  
D1 2.00000000 sec  
D11 0.03000000 sec  
TD0 1  
SFO1 100.6228298 MHz  
NUC1 13C  
P0 3.33 usec  
P1 10.00 usec  
PLW1 87.89900208 W  
SFO2 400.1316005 MHz  
NUC2 1H  
CPDPRG[2] waltz65  
PCPD2 90.00 usec  
PLW2 20.73200035 W  
PLW12 0.25595000 W  
PLW13 0.12874000 W

F2 - Processing parameters  
SI 32768  
SF 100.6127685 MHz  
WDW EM  
SSB 0  
LB 1.00 Hz  
GB 0  
PC 1.40

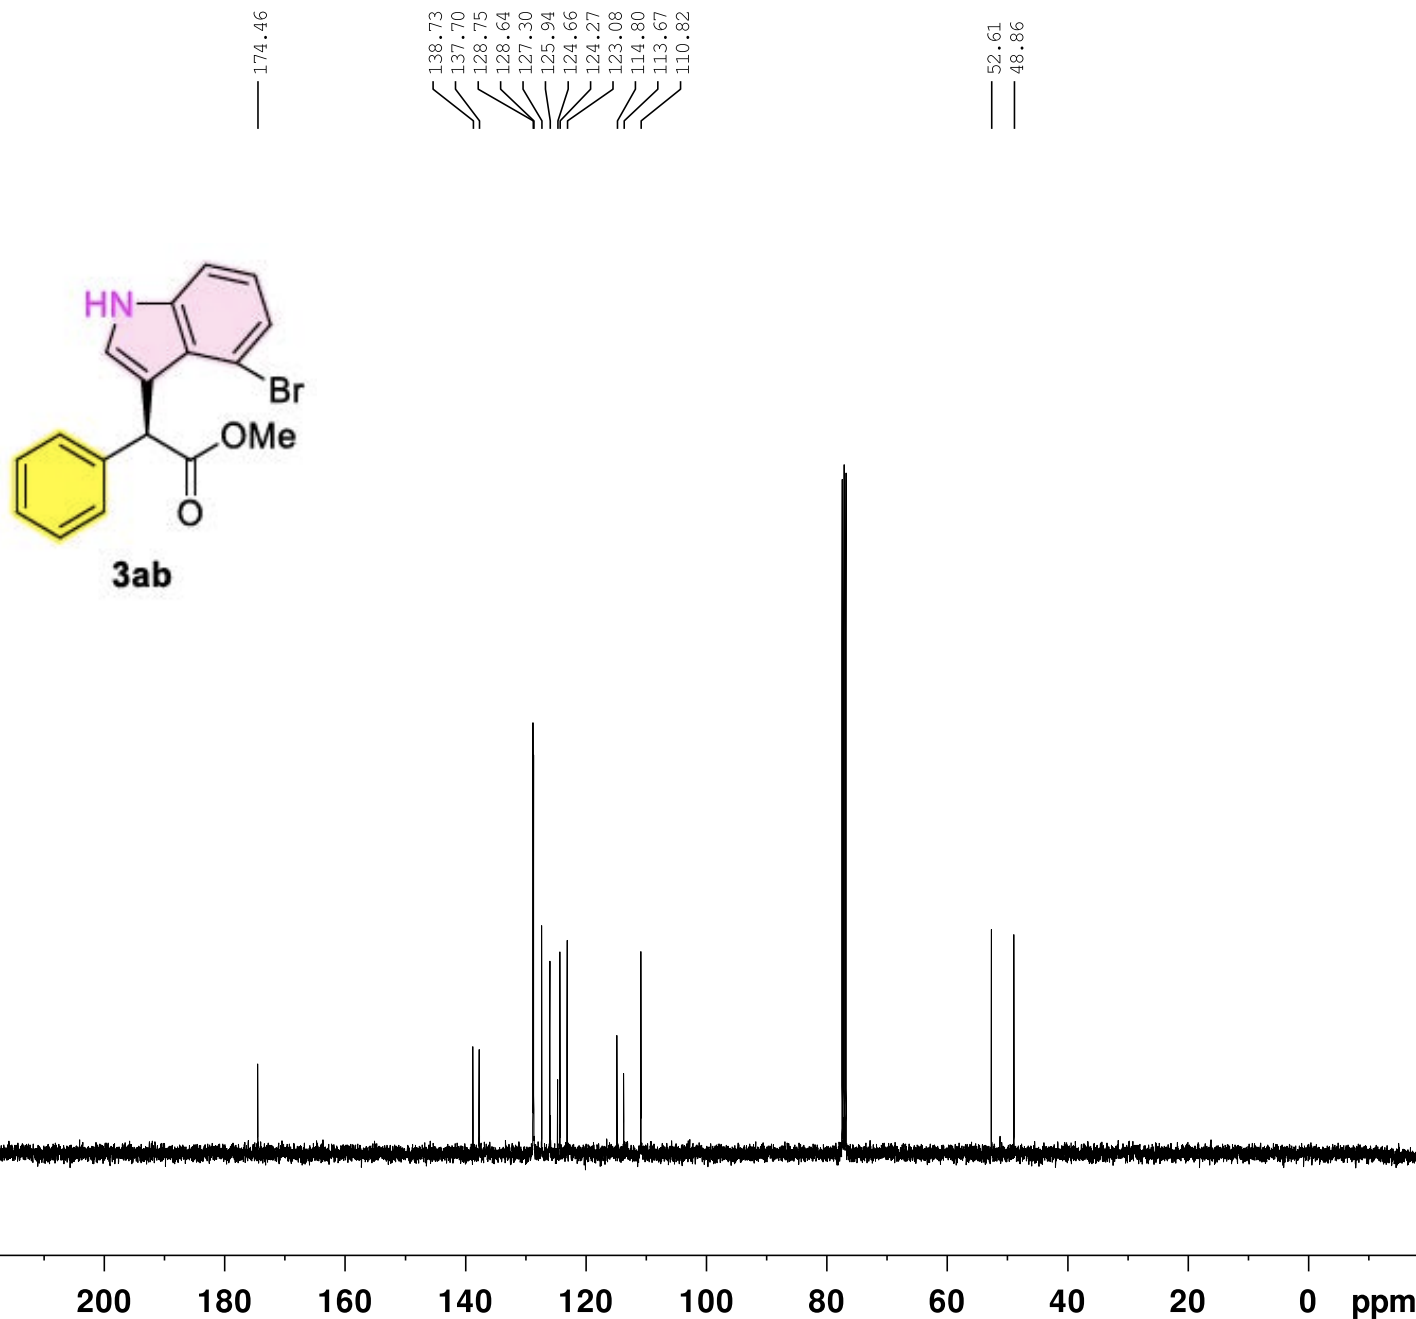

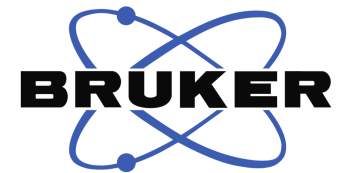

Current Data Parameters  
NAME NMR-YX-6-p52  
EXPNO 1  
PROCNO 1

F2 - Acquisition Parameters  
Date\_ 20231107  
Time 11.21 h  
INSTRUM Avance  
PROBHD z116098\_0833 (  
PULPROG zg30  
TD 65536  
SOLVENT CDCl3  
NS 16  
DS 2  
SWH 8196.722 Hz  
FIDRES 0.250144 Hz  
AQ 3.9976959 sec  
RG 100.806  
DW 61.000 usec  
DE 13.54 usec  
TE 294.0 K  
D1 1.00000000 sec  
TD0 1  
SFO1 400.1324708 MHz  
NUC1 1H  
P0 3.33 usec  
P1 10.00 usec  
PLW1 20.73200035 W

F2 - Processing parameters  
SI 65536  
SF 400.1300169 MHz  
WDW EM  
SSB 0  
LB 0.30 Hz  
GB 0  
PC 1.00

7.390  
7.373  
7.371  
7.340  
7.336  
7.331  
7.319  
7.315  
7.300  
7.287  
7.283  
7.280  
7.272  
7.266  
7.245  
7.242  
7.224  
7.220  
7.175  
7.169  
7.147  
7.137  
7.132  
5.184  
3.746

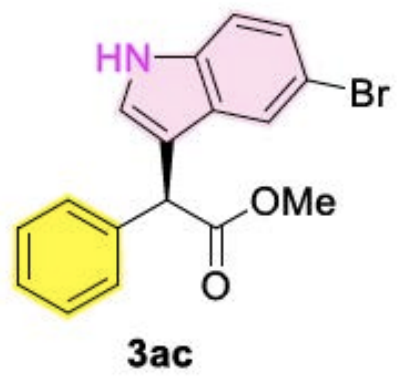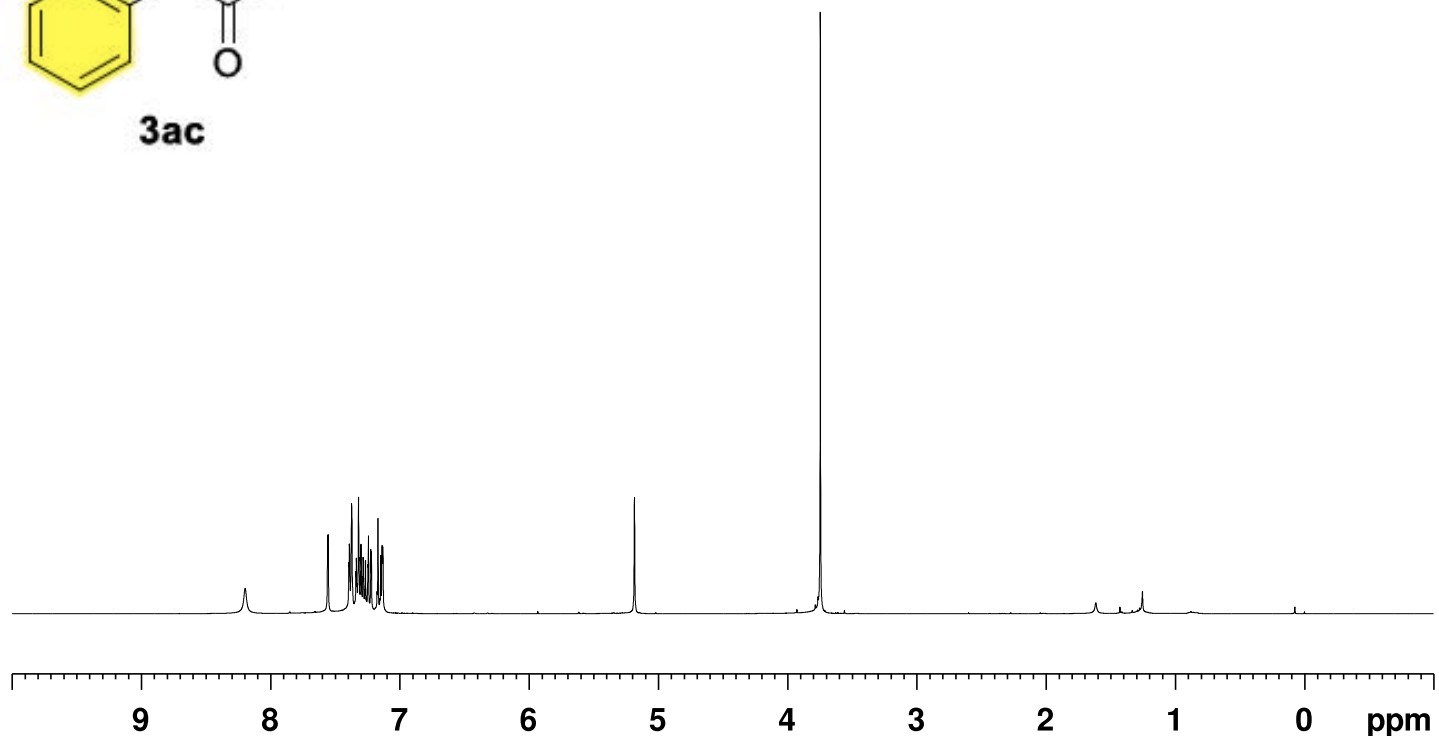

1.06  
1.04  
2.10  
2.27  
1.09  
1.42  
2.20

1.00

3.04

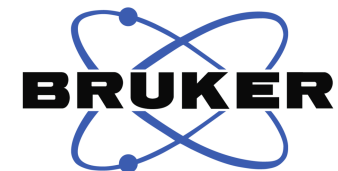

Current Data Parameters  
NAME NMR-YX-6-p52  
EXPNO 2  
PROCNO 1

F2 - Acquisition Parameters  
Date\_ 20231107  
Time 11.28 h  
INSTRUM Avance  
PROBHD z116098\_0833 (  
PULPROG zgpg30  
TD 65536  
SOLVENT CDC13  
NS 100  
DS 4  
SWH 23809.523 Hz  
FIDRES 0.726609 Hz  
AQ 1.3762560 sec  
RG 47.4244  
DW 21.000 usec  
DE 6.50 usec  
TE 294.1 K  
D1 2.00000000 sec  
D11 0.03000000 sec  
TD0 1  
SFO1 100.6228298 MHz  
NUC1 13C  
P0 3.33 usec  
P1 10.00 usec  
PLW1 87.8990208 W  
SFO2 400.1316005 MHz  
NUC2 1H  
CPDPRG[2] waltz65  
PCPD2 90.00 usec  
PLW2 20.73200035 W  
PLW12 0.25595000 W  
PLW13 0.12874000 W

F2 - Processing parameters  
SI 32768  
SF 100.6127685 MHz  
WDW EM  
SSB 0  
LB 1.00 Hz  
GB 0  
PC 1.40

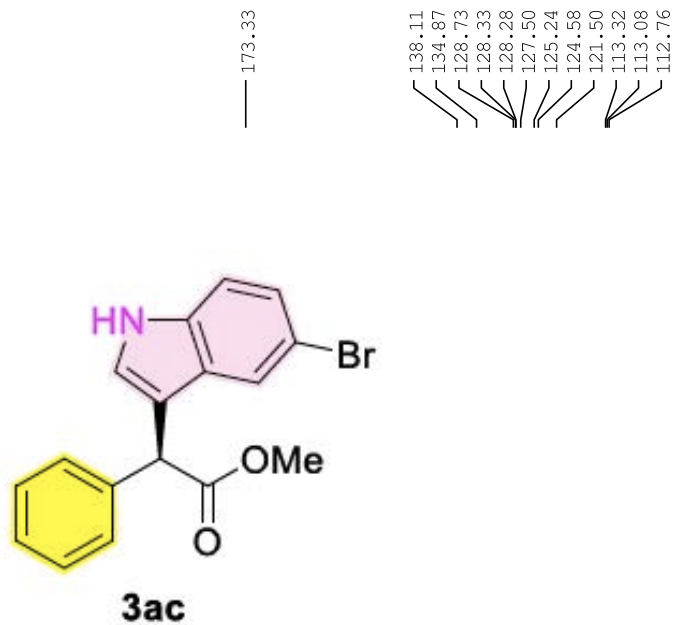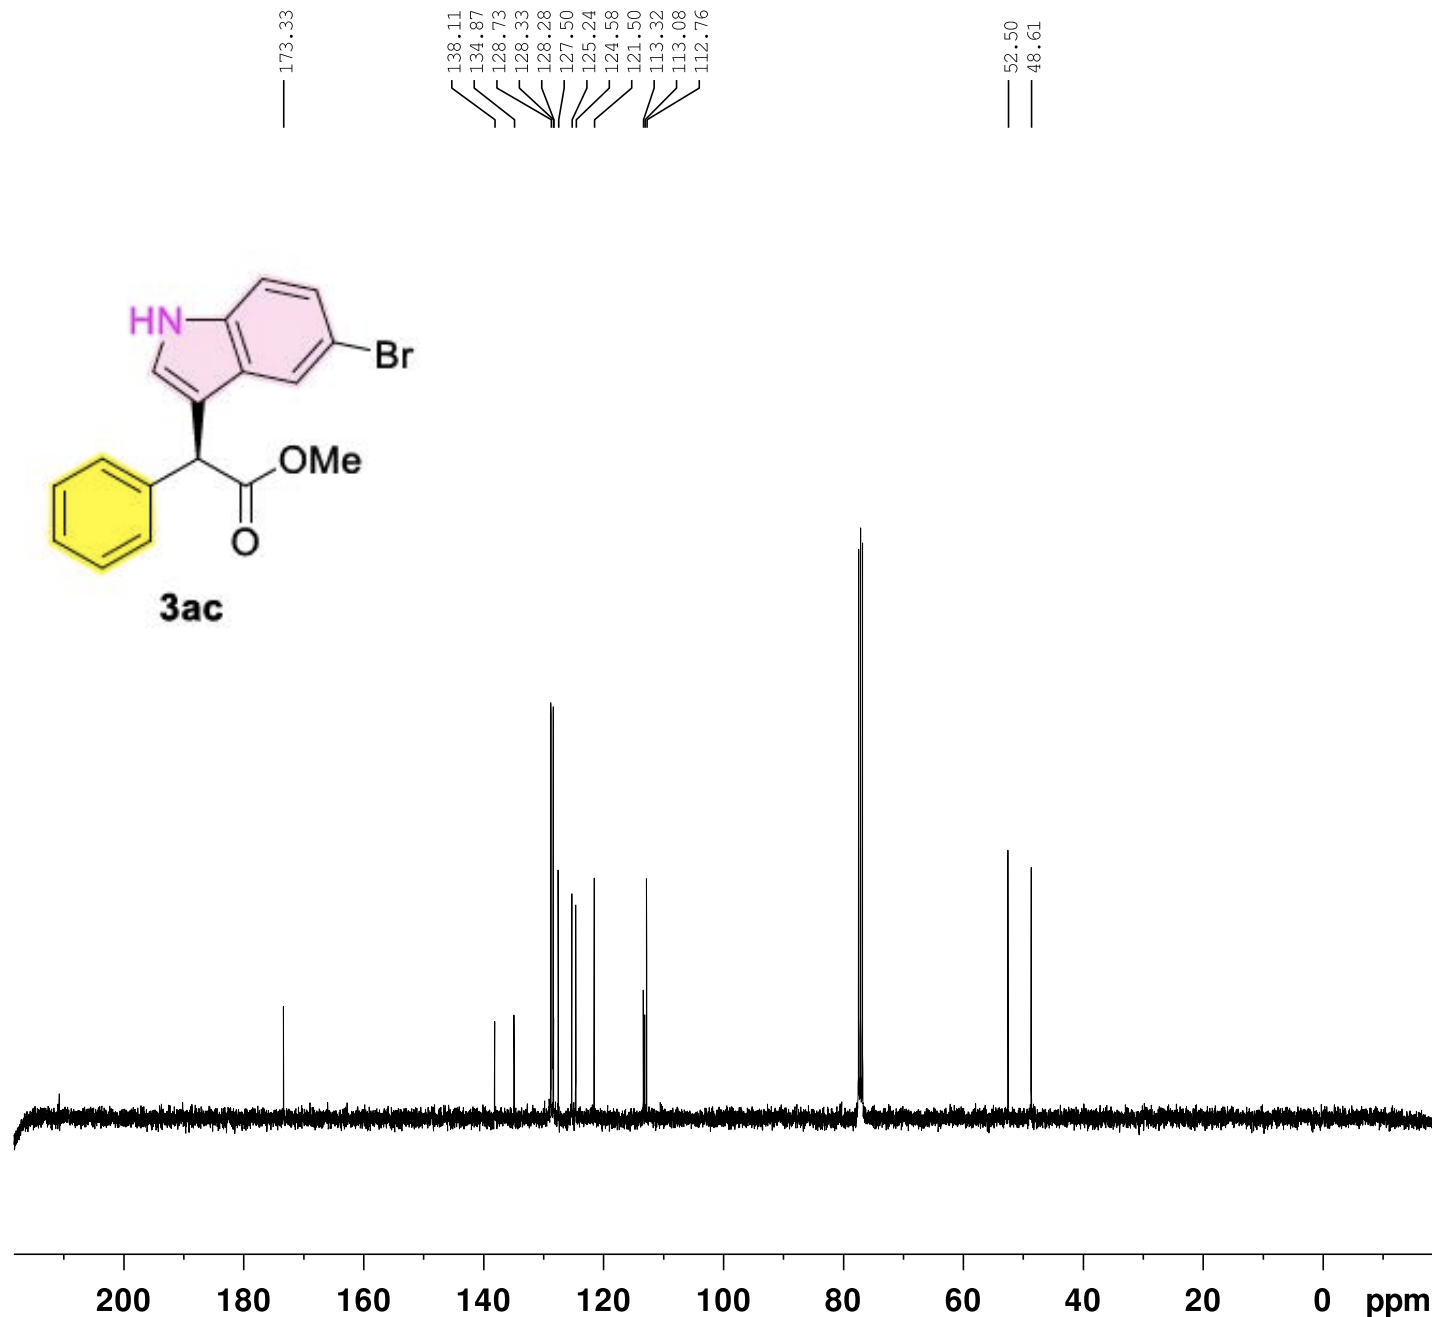



Current Data Parameters  
NAME HNMR-YX-6-p54  
EXPNO 1  
PROCNO 1

F2 - Acquisition Parameters  
Date\_ 20231027  
Time 14.13  
INSTRUM spect  
PROBHD 5 mm PADUL 13C  
PULPROG zg30  
TD 65536  
SOLVENT CDCl3  
NS 4  
DS 2  
SWH 8223.685 Hz  
FIDRES 0.125483 Hz  
AQ 3.9845889 sec  
RG 90.23  
DW 60.800 usec  
DE 6.50 usec  
TE 291.9 K  
D1 1.00000000 sec  
TD0 1

=====  
CHANNEL f1  
NUC1 1H  
P1 9.90 usec  
PLW1 23.00000000 W  
SFO1 400.1924713 MHz

F2 - Processing parameters  
SI 65536  
SF 400.1900263 MHz  
WDW EM  
SSB 0  
LB 0.30 Hz  
GB 0  
PC 1.00

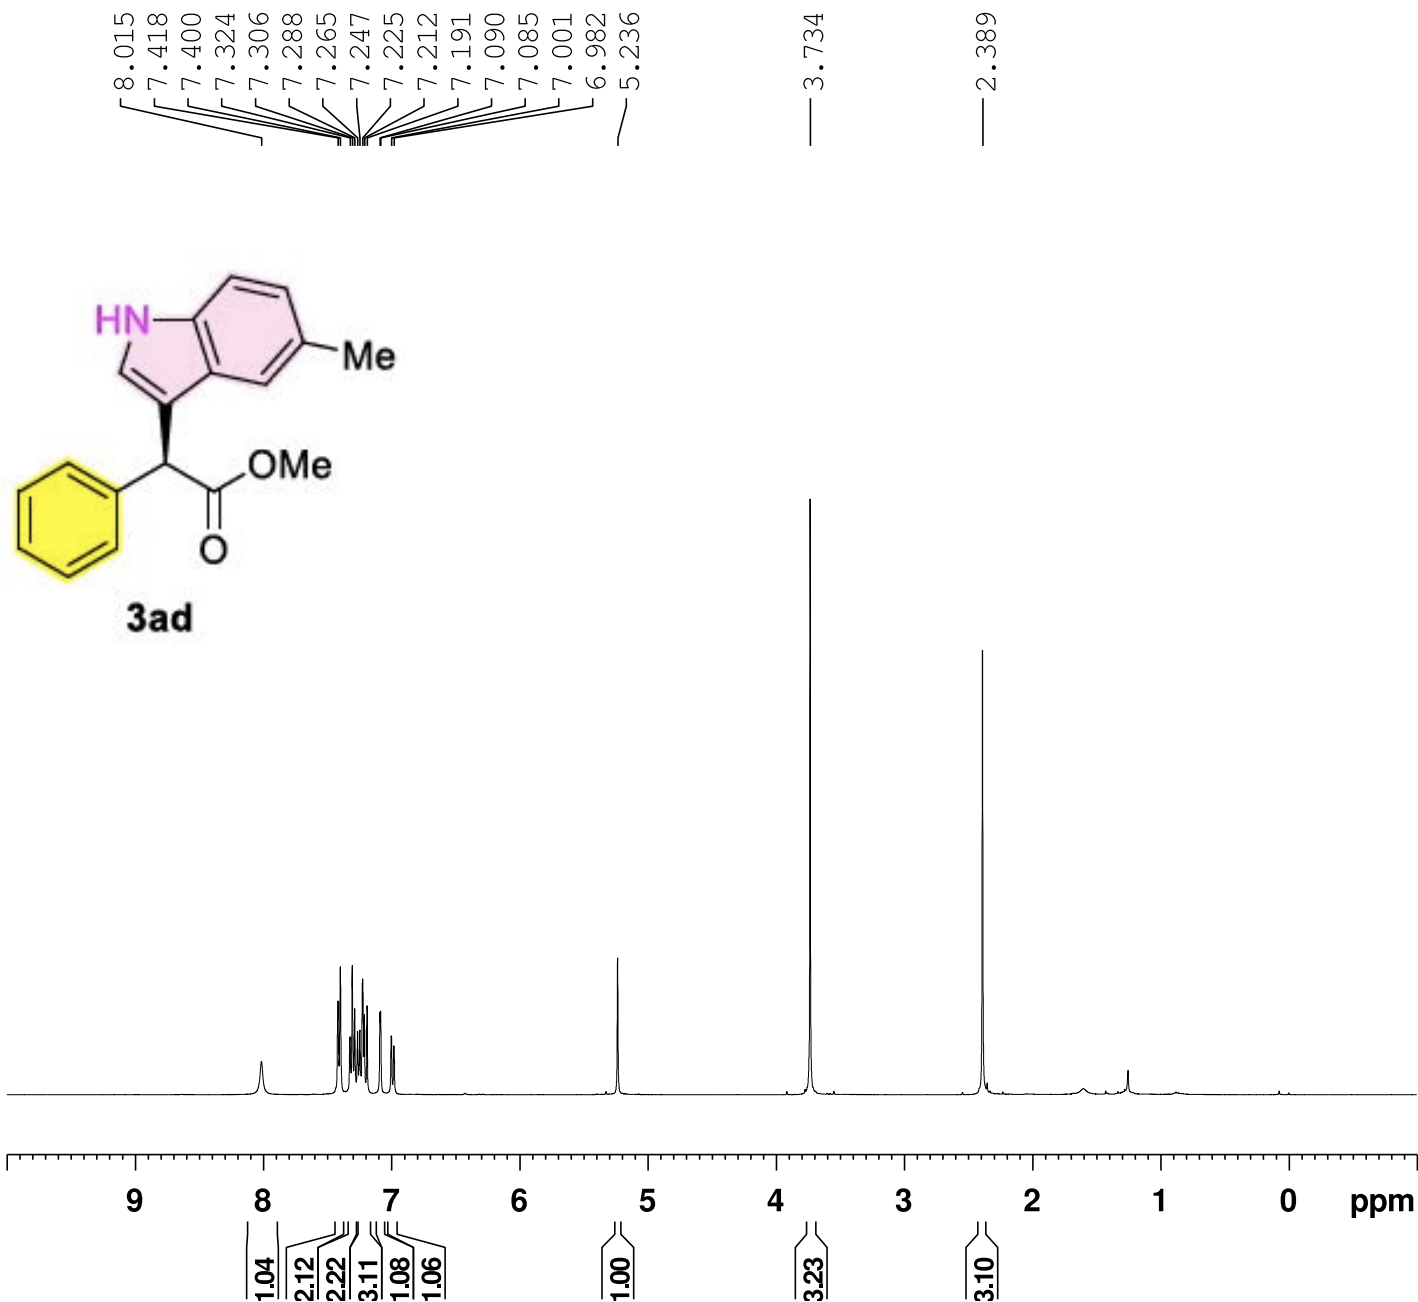

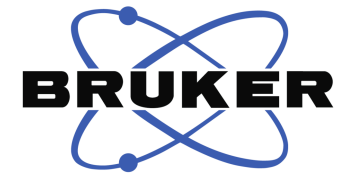

Current Data Parameters  
NAME CNMR-YX-6-p54  
EXPNO 2  
PROCNO 1

F2 - Acquisition Parameters  
Date\_ 20231027  
Time 14.20  
INSTRUM spect  
PROBHD 5 mm PADUL 13C  
PULPROG zgpg30  
TD 65536  
SOLVENT CDC13  
NS 100  
DS 4  
SWH 24038.461 Hz  
FIDRES 0.366798 Hz  
AQ 1.3631488 sec  
RG 35.06  
DW 20.800 usec  
DE 6.50 usec  
TE 292.5 K  
D1 2.00000000 sec  
D11 0.03000000 sec  
TD0 1

==== CHANNEL f1 =====  
NUC1 13C  
P1 9.80 usec  
PLW1 47.40000153 W  
SFO1 100.6379178 MHz

==== CHANNEL f2 =====  
CPDPRG[2] waltz16  
NUC2 1H  
PCPD2 90.00 usec  
PLW2 23.00000000 W  
PLW12 0.30712000 W  
PLW13 0.24877000 W  
SFO2 400.1916008 MHz

F2 - Processing parameters  
SI 32768  
SF 100.6278560 MHz  
WDW EM  
SSB 0  
LB 1.00 Hz  
GB 0  
PC 1.40

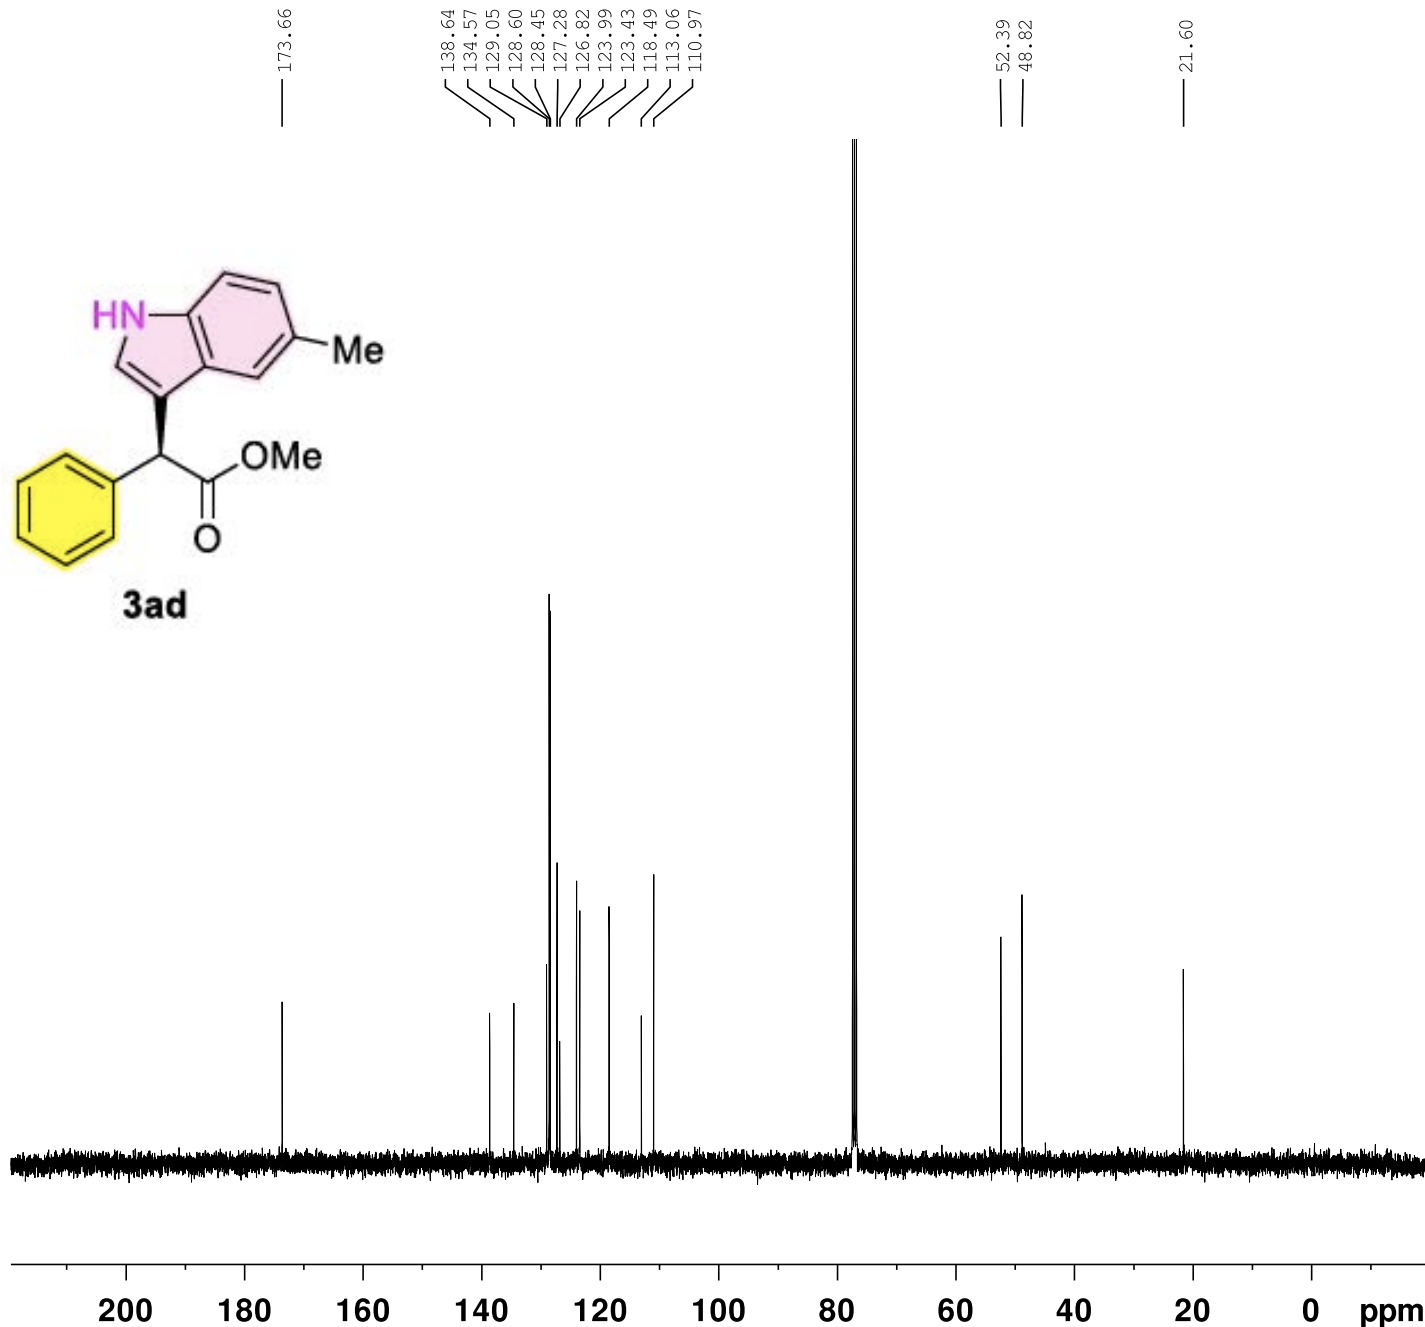



Current Data Parameters  
NAME HNMR-YX-6-p55  
EXPNO 1  
PROCNO 1

F2 - Acquisition Parameters  
Date\_ 20231019  
Time 6.48 h  
INSTRUM Avance  
PROBHD Z116098\_0833 (  
PULPROG zg30  
TD 65536  
SOLVENT CDCl3  
NS 16  
DS 2  
SWH 8196.722 Hz  
FIDRES 0.250144 Hz  
AQ 3.9976959 sec  
RG 101  
DW 61.000 usec  
DE 13.54 usec  
TE 294.0 K  
D1 1.00000000 sec  
TD0 1  
SF01 400.1324708 MHz  
NUC1 1H  
P0 3.33 usec  
P1 10.00 usec  
PLW1 20.73200035 W

F2 - Processing parameters  
SI 65536  
SF 400.1300160 MHz  
WDW EM  
SSB 0  
LB 0.30 Hz  
GB 0  
PC 1.00

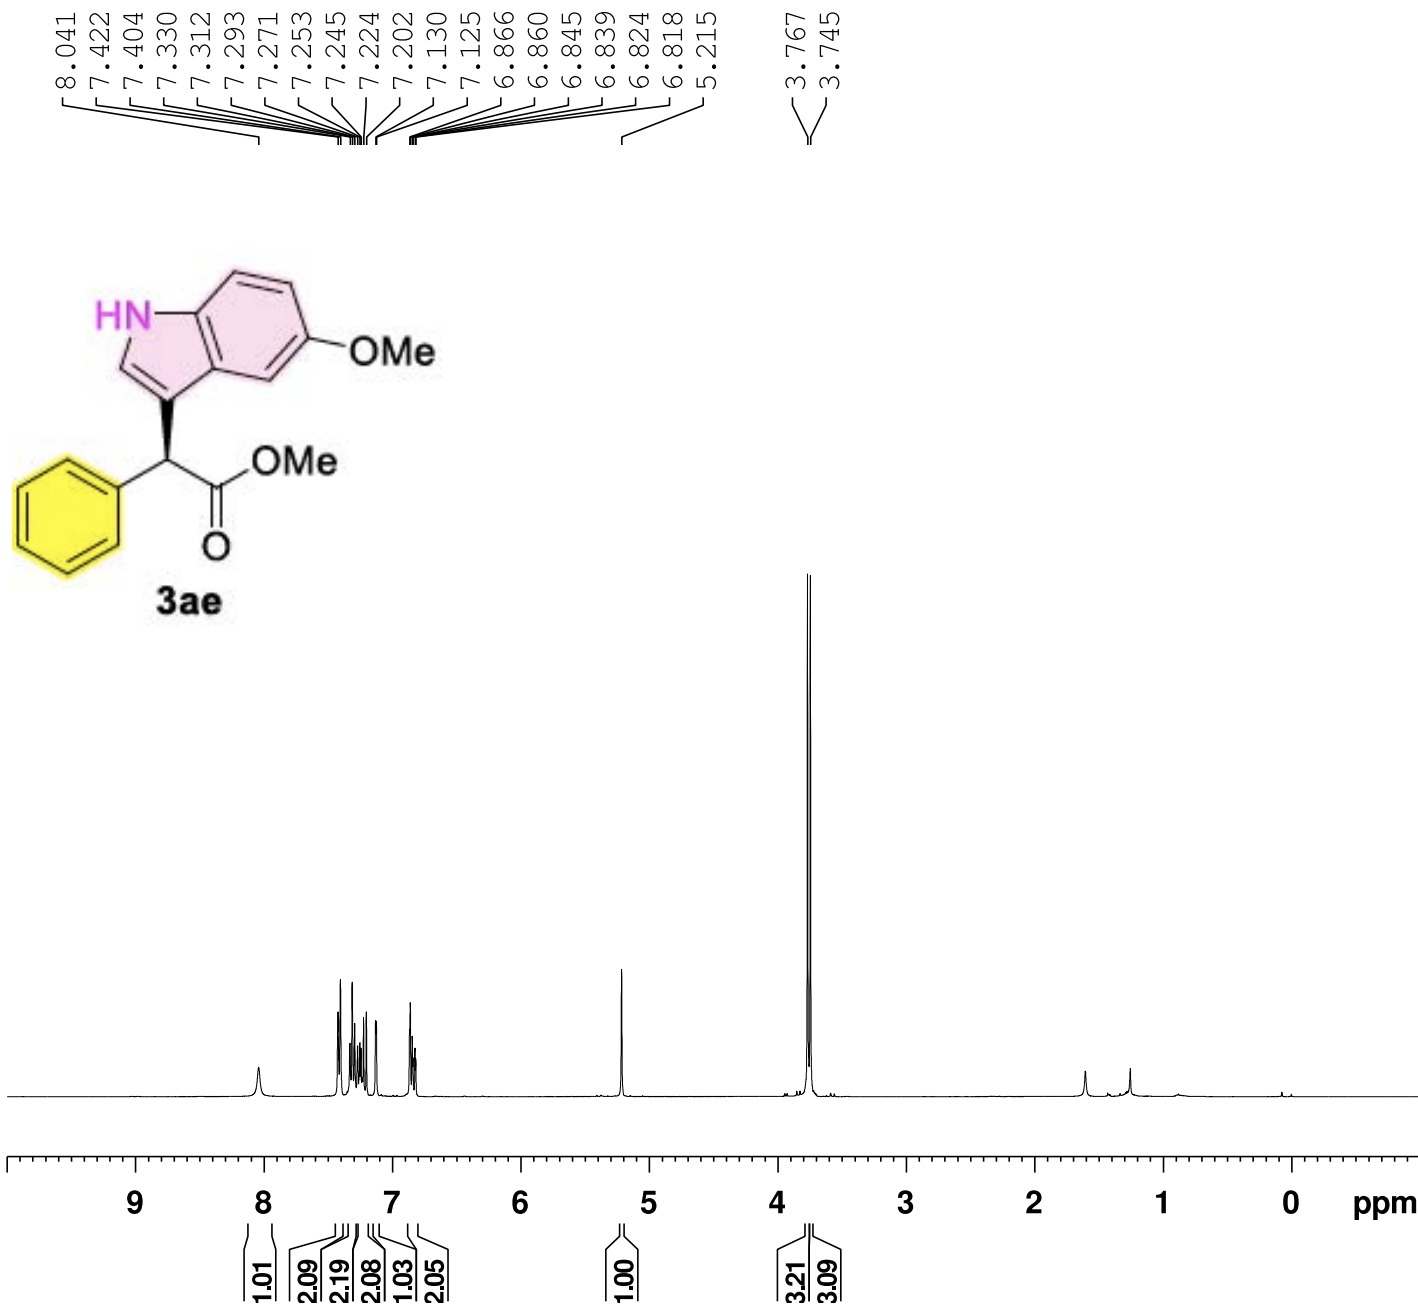





Current Data Parameters  
NAME CNMR-YX-6-p55  
EXPNO 2  
PROCNO 1

F2 - Acquisition Parameters  
Date\_ 20231019  
Time 6.55 h  
INSTRUM Avance  
PROBHD Z116098\_0833 (  
PULPROG zgpg30  
TD 65536  
SOLVENT CDC13  
NS 100  
DS 4  
SWH 23809.523 Hz  
FIDRES 0.726609 Hz  
AQ 1.3762560 sec  
RG 46.0295  
DW 21.000 usec  
DE 6.50 usec  
TE 293.9 K  
D1 2.00000000 sec  
D11 0.03000000 sec  
TD0 1  
SFO1 100.6228298 MHz  
NUC1 13C  
P0 3.33 usec  
P1 10.00 usec  
PLW1 87.89900208 W  
SFO2 400.1316005 MHz  
NUC2 1H  
CPDPRG[2] waltz65  
PCPD2 90.00 usec  
PLW2 20.73200035 W  
PLW12 0.25595000 W  
PLW13 0.12874000 W

F2 - Processing parameters  
SI 32768  
SF 100.6127685 MHz  
WDW EM  
SSB 0  
LB 1.00 Hz  
GB 0  
PC 1.40

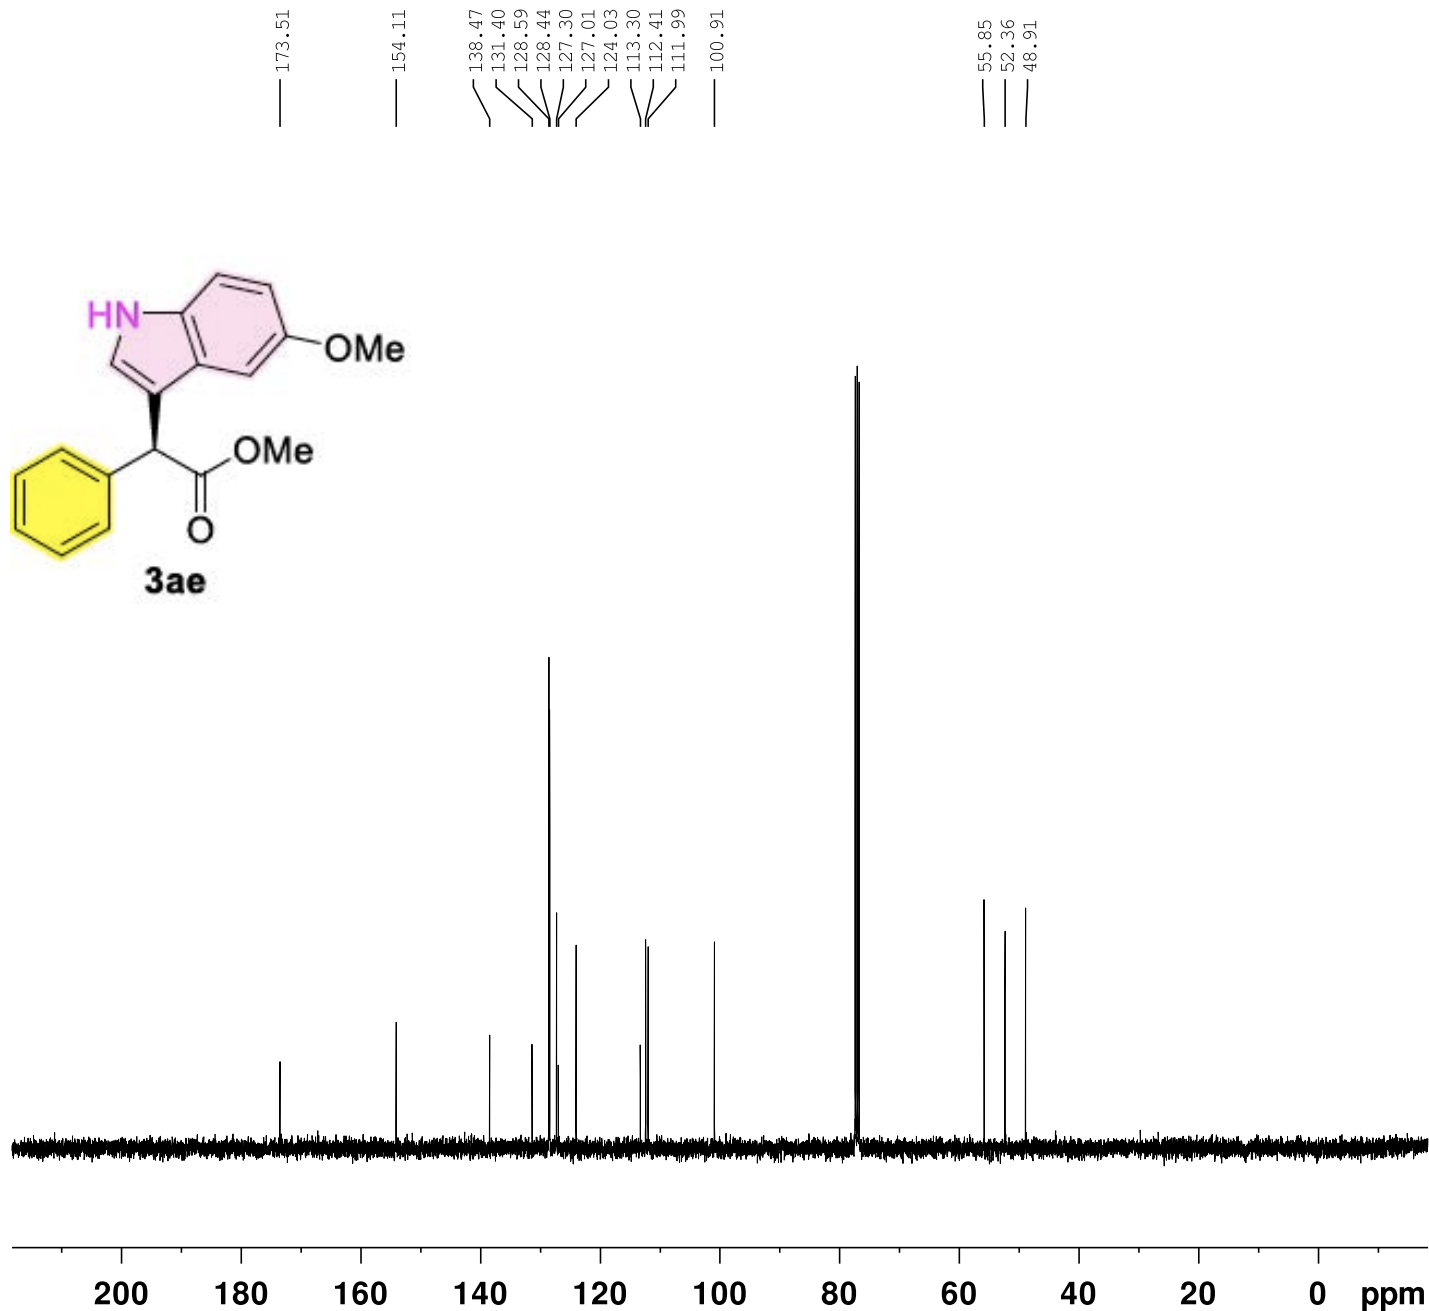



Current Data Parameters  
NAME HNMR-YX-6-p53  
EXPNO 1  
PROCNO 1

F2 - Acquisition Parameters  
Date\_ 20231019  
Time 6.37 h  
INSTRUM Avance  
PROBHD Z116098\_0833 (  
PULPROG zg30  
TD 65536  
SOLVENT CDCl3  
NS 16  
DS 2  
SWH 8196.722 Hz  
FIDRES 0.250144 Hz  
AQ 3.9976959 sec  
RG 101  
DW 61.000 usec  
DE 13.54 usec  
TE 293.4 K  
D1 1.00000000 sec  
TD0 1  
SF01 400.1324708 MHz  
NUC1 1H  
P0 3.33 usec  
P1 10.00 usec  
PLW1 20.73200035 W

F2 - Processing parameters  
SI 65536  
SF 400.1300156 MHz  
WDW EM  
SSB 0  
LB 0.30 Hz  
GB 0  
PC 1.00

7.389  
7.385  
7.367  
7.365  
7.333  
7.329  
7.312  
7.308  
7.297  
7.293  
7.277  
7.259  
7.256  
7.245  
7.157  
7.152  
7.135  
7.131  
7.115  
7.113  
7.109  
7.107  
5.211  
3.745

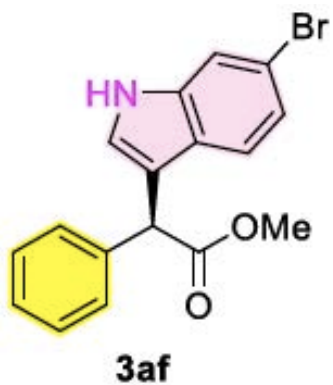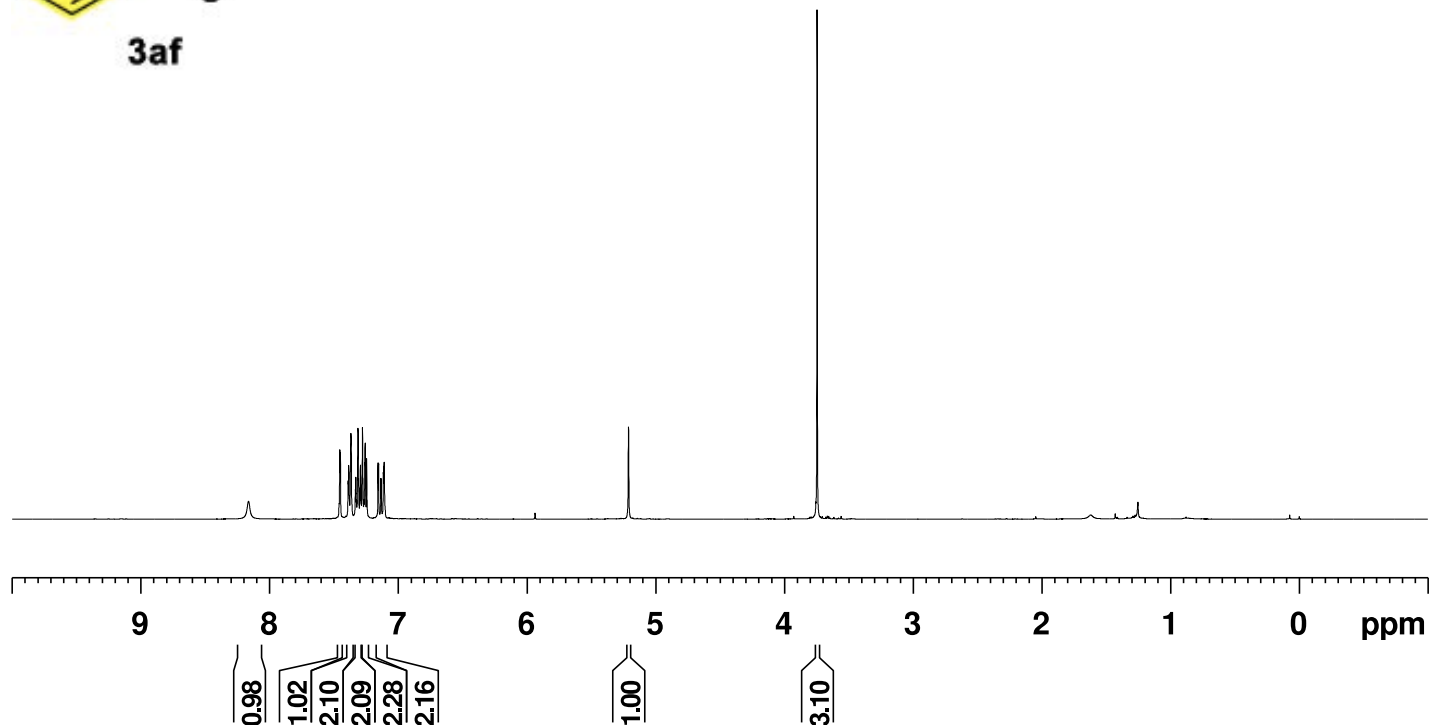



Current Data Parameters  
NAME CNMR-YX-6-p53  
EXPNO 2  
PROCNO 1

F2 - Acquisition Parameters

Date\_ 20231019  
Time 6.44 h  
INSTRUM Avance  
PROBHD Z116098\_0833 (  
PULPROG zgpg30  
TD 65536  
SOLVENT CDC13  
NS 100  
DS 4  
SWH 23809.523 Hz  
FIDRES 0.726609 Hz  
AQ 1.3762560 sec  
RG 47.2408  
DW 21.000 usec  
DE 6.50 usec  
TE 294.1 K  
D1 2.00000000 sec  
D11 0.03000000 sec  
TD0 1  
SFO1 100.6228298 MHz  
NUC1 13C  
P0 3.33 usec  
P1 10.00 usec  
PLW1 87.89900208 W  
SFO2 400.1316005 MHz  
NUC2 1H  
CPDPRG[2] waltz65  
PCPD2 90.00 usec  
PLW2 20.73200035 W  
PLW12 0.25595000 W  
PLW13 0.12874000 W

F2 - Processing parameters

SI 32768  
SF 100.6127685 MHz  
WDW EM  
SSB 0  
LB 1.00 Hz  
GB 0  
PC 1.40

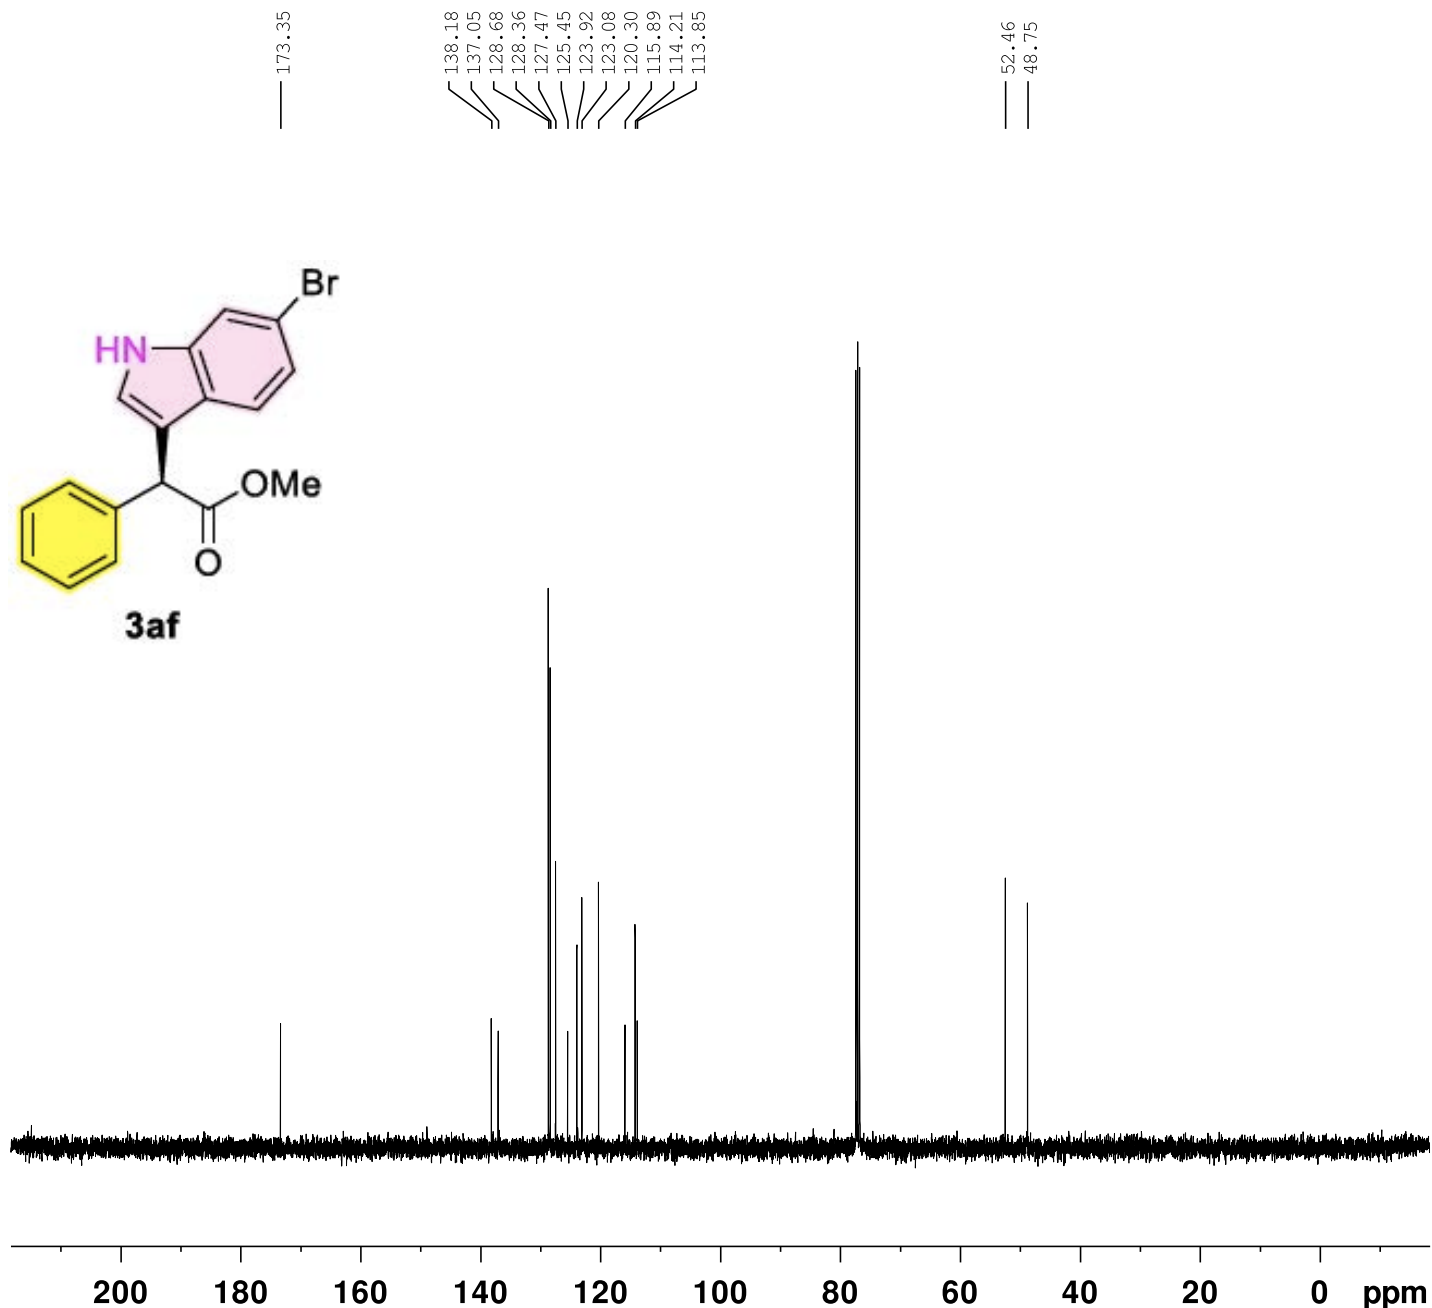



Current Data Parameters  
NAME HNMR-YX-5-p26  
EXPNO 1053  
PROCNO 1

F2 - Acquisition Parameters  
Date\_ 20230711  
Time 20.43  
INSTRUM spect  
PROBHD 5 mm PABBO BB-  
PULPROG zg30  
TD 65536  
SOLVENT CDCl3  
NS 16  
DS 2  
SWH 6009.615 Hz  
FIDRES 0.091699 Hz  
AQ 5.4525952 sec  
RG 144  
DW 83.200 usec  
DE 6.50 usec  
TE 300.1 K  
D1 1.00000000 sec  
TD0 1

==== CHANNEL f1 =====  
SFO1 300.1318534 MHz  
NUC1 1H  
P1 10.00 usec  
PLW1 14.00000000 W

F2 - Processing parameters  
SI 65536  
SF 300.1300398 MHz  
WDW EM  
SSB 0  
LB 0.30 Hz  
GB 0  
PC 1.00

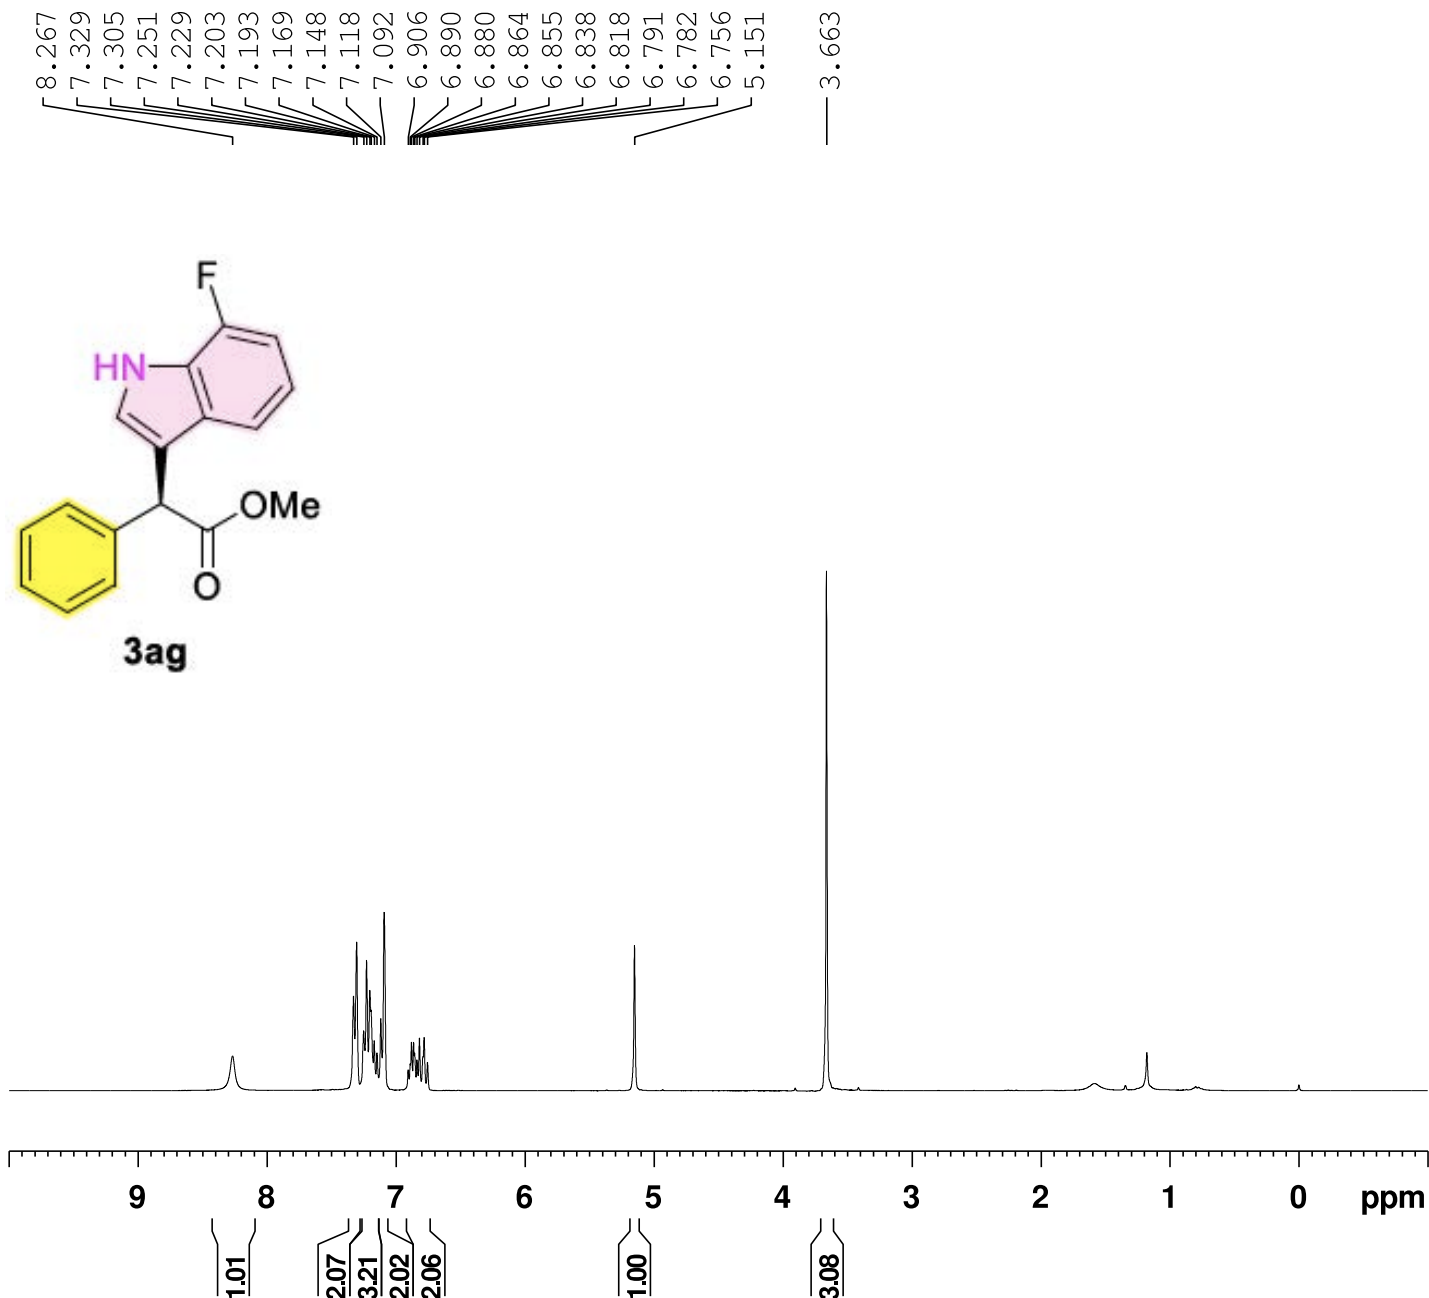

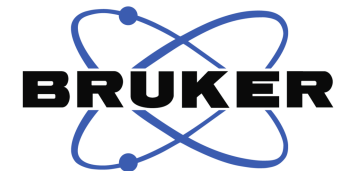

Current Data Parameters  
NAME CNMR-YX-5-p26  
EXPNO 1060  
PROCNO 1

F2 - Acquisition Parameters  
Date\_ 20230712  
Time 1.36  
INSTRUM spect  
PROBHD 5 mm PABBO BB-  
PULPROG zgpg30  
TD 65536  
SOLVENT CDCl3  
NS 100  
DS 4  
SWH 18028.846 Hz  
FIDRES 0.275098 Hz  
AQ 1.8175317 sec  
RG 203  
DW 27.733 usec  
DE 6.50 usec  
TE 300.7 K  
D1 2.00000000 sec  
D11 0.03000000 sec  
TD0 1

==== CHANNEL f1 =====  
SFO1 75.4752949 MHz  
NUC1 13C  
P1 9.50 usec  
PLW1 34.20000076 W

==== CHANNEL f2 =====  
SFO2 300.1312005 MHz  
NUC2 1H  
CPDPRG[2] waltz16  
PCPD2 90.00 usec  
PLW2 14.00000000 W  
PLW12 0.17284000 W  
PLW13 0.14000000 W

F2 - Processing parameters  
SI 32768  
SF 75.4677485 MHz  
WDW EM  
SSB 0  
LB 1.00 Hz  
GB 0  
PC 1.40

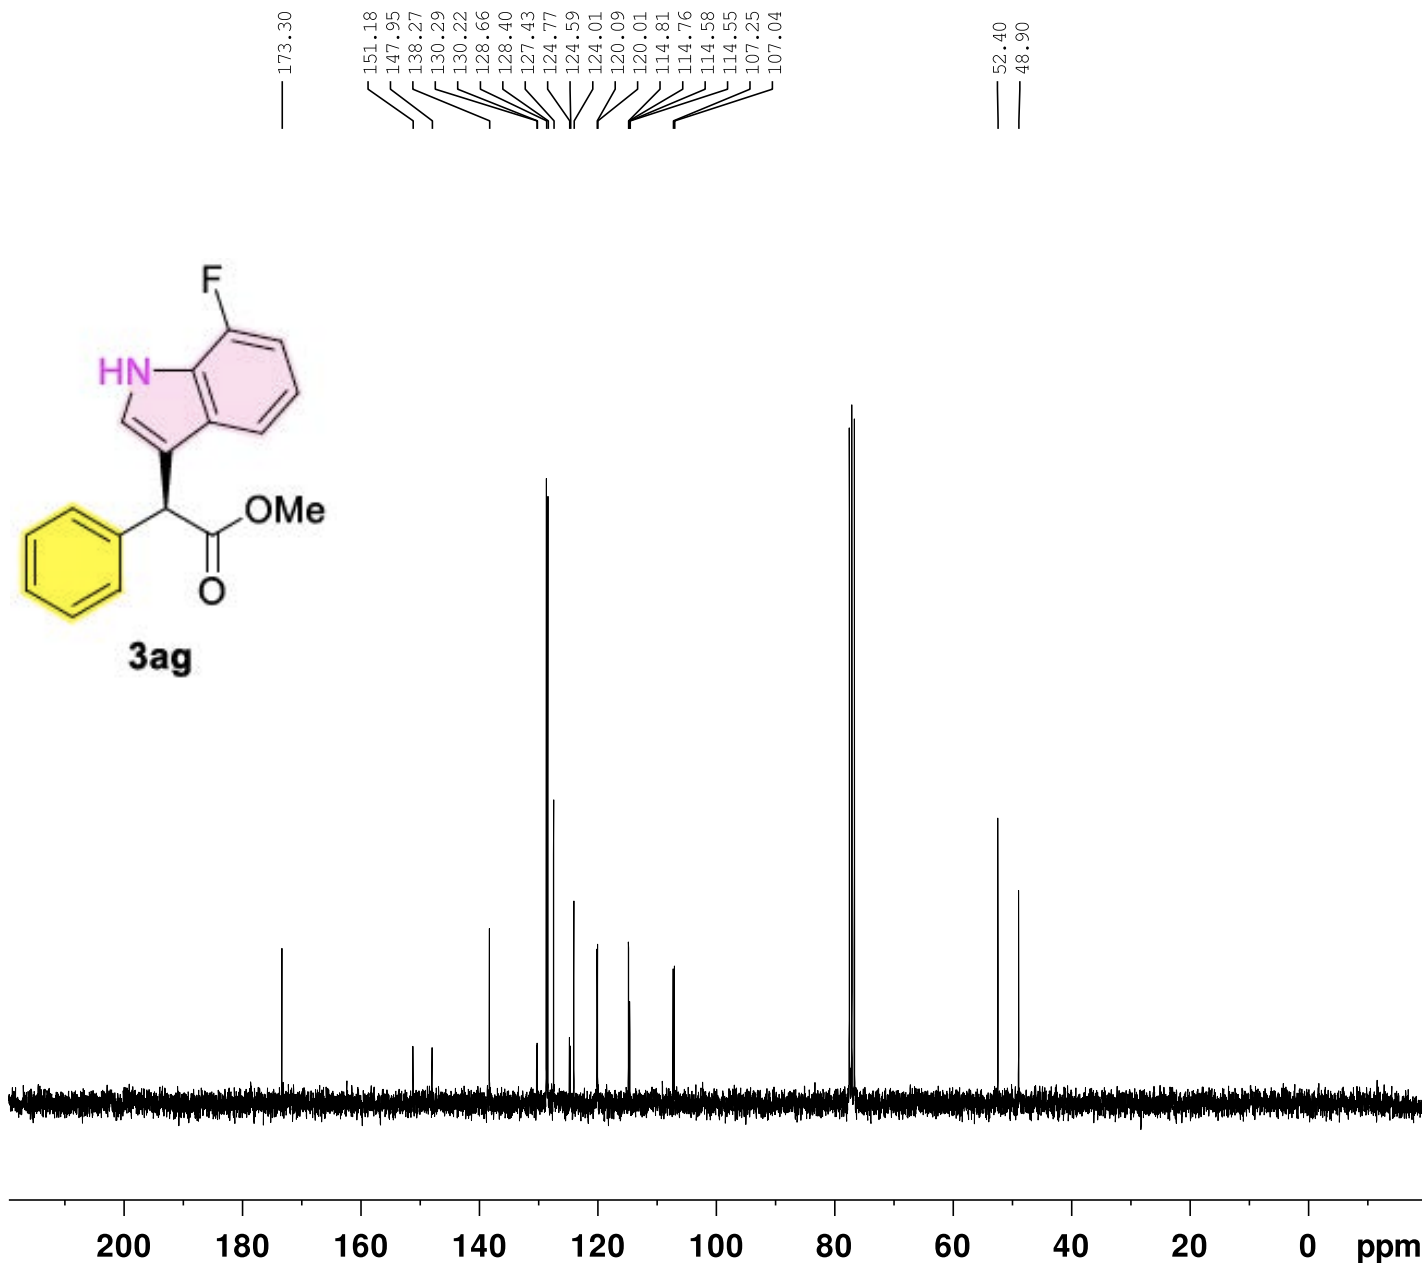

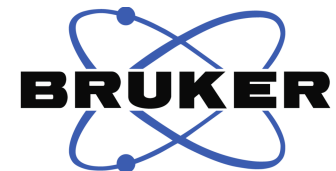

Current Data Parameters  
NAME FNMN-YX-5-p26  
EXPNO 1054  
PROCNO 1

F2 - Acquisition Parameters  
Date\_ 20230711  
Time 20.45  
INSTRUM spect  
PROBHD 5 mm PABBO BB-  
PULPROG zgfhigqn.2  
TD 131072  
SOLVENT CDCl3  
NS 16  
DS 4  
SWH 66964.289 Hz  
FIDRES 0.510897 Hz  
AQ 0.9786710 sec  
RG 203  
DW 7.467 usec  
DE 6.50 usec  
TE 300.2 K  
D1 1.00000000 sec  
D11 0.03000000 sec  
D12 0.00002000 sec  
TD0 1

==== CHANNEL f1 =====  
SFO1 282.3761148 MHz  
NUC1 19F  
P1 14.50 usec  
PLW1 10.39999962 W

==== CHANNEL f2 =====  
SFO2 300.1312005 MHz  
NUC2 1H  
CPDPRG[2] waltz16  
PCPD2 90.00 usec  
PLW2 14.00000000 W  
PLW12 0.17284000 W

F2 - Processing parameters  
SI 65536  
SF 282.4043552 MHz  
WDW EM  
SSB 0  
LB 0.30 Hz  
GB 0  
PC 1.00

-135.27

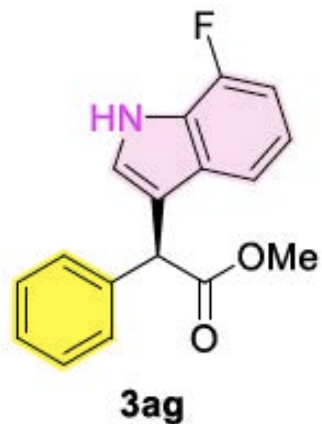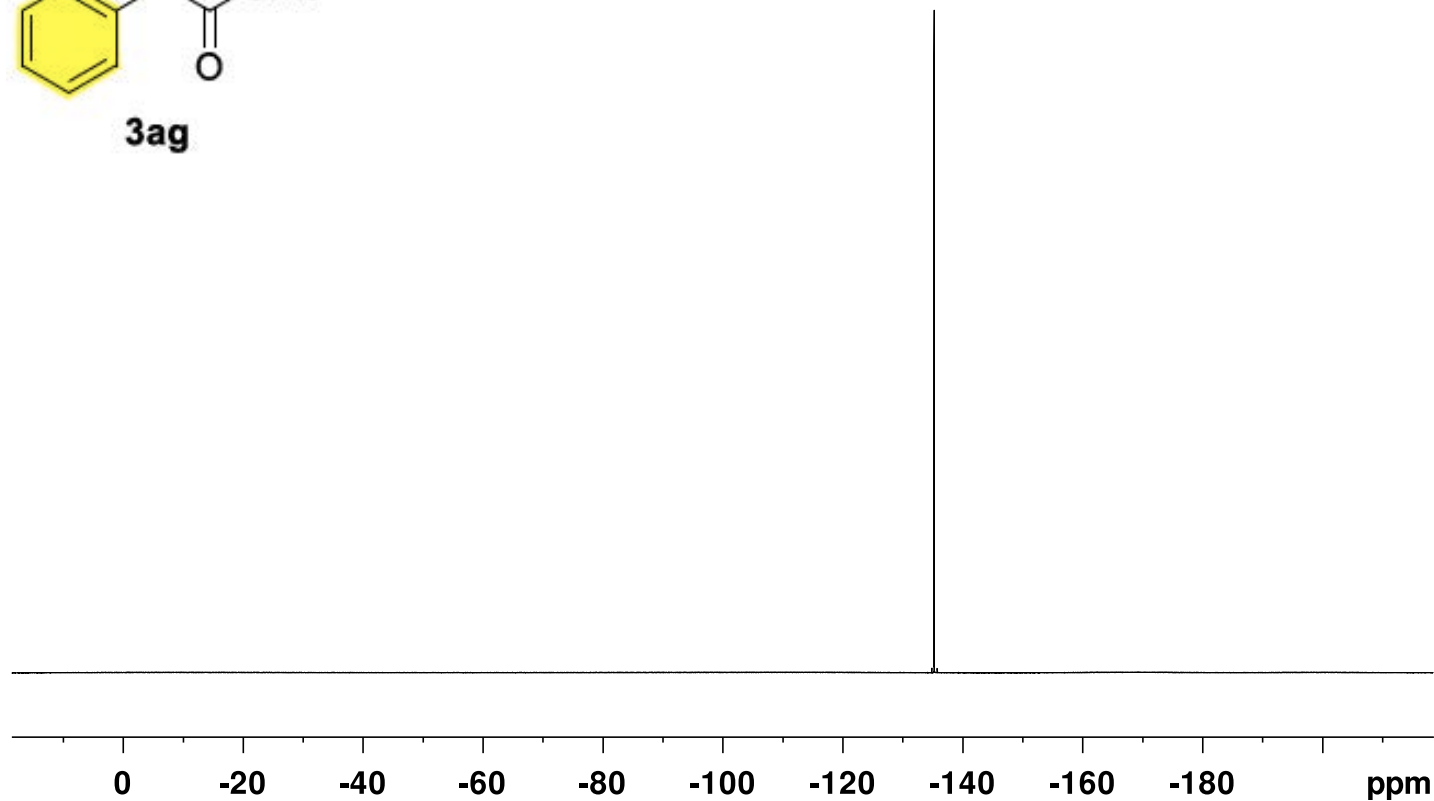



Current Data Parameters  
NAME HNMR-YX-5-p14  
EXPNO 1025  
PROCNO 1

F2 - Acquisition Parameters  
Date\_ 20230705  
Time 21.08  
INSTRUM spect  
PROBHD 5 mm PABBO BB-  
PULPROG zg30  
TD 65536  
SOLVENT CDCl3  
NS 16  
DS 2  
SWH 6009.615 Hz  
FIDRES 0.091699 Hz  
AQ 5.4525952 sec  
RG 128  
DW 83.200 usec  
DE 6.50 usec  
TE 297.6 K  
D1 1.00000000 sec  
TD0 1

==== CHANNEL f1 =====  
SFO1 300.1318534 MHz  
NUC1 1H  
P1 10.00 usec  
PLW1 14.00000000 W

F2 - Processing parameters  
SI 65536  
SF 300.1300428 MHz  
WDW EM  
SSB 0  
LB 0.30 Hz  
GB 0  
PC 1.00

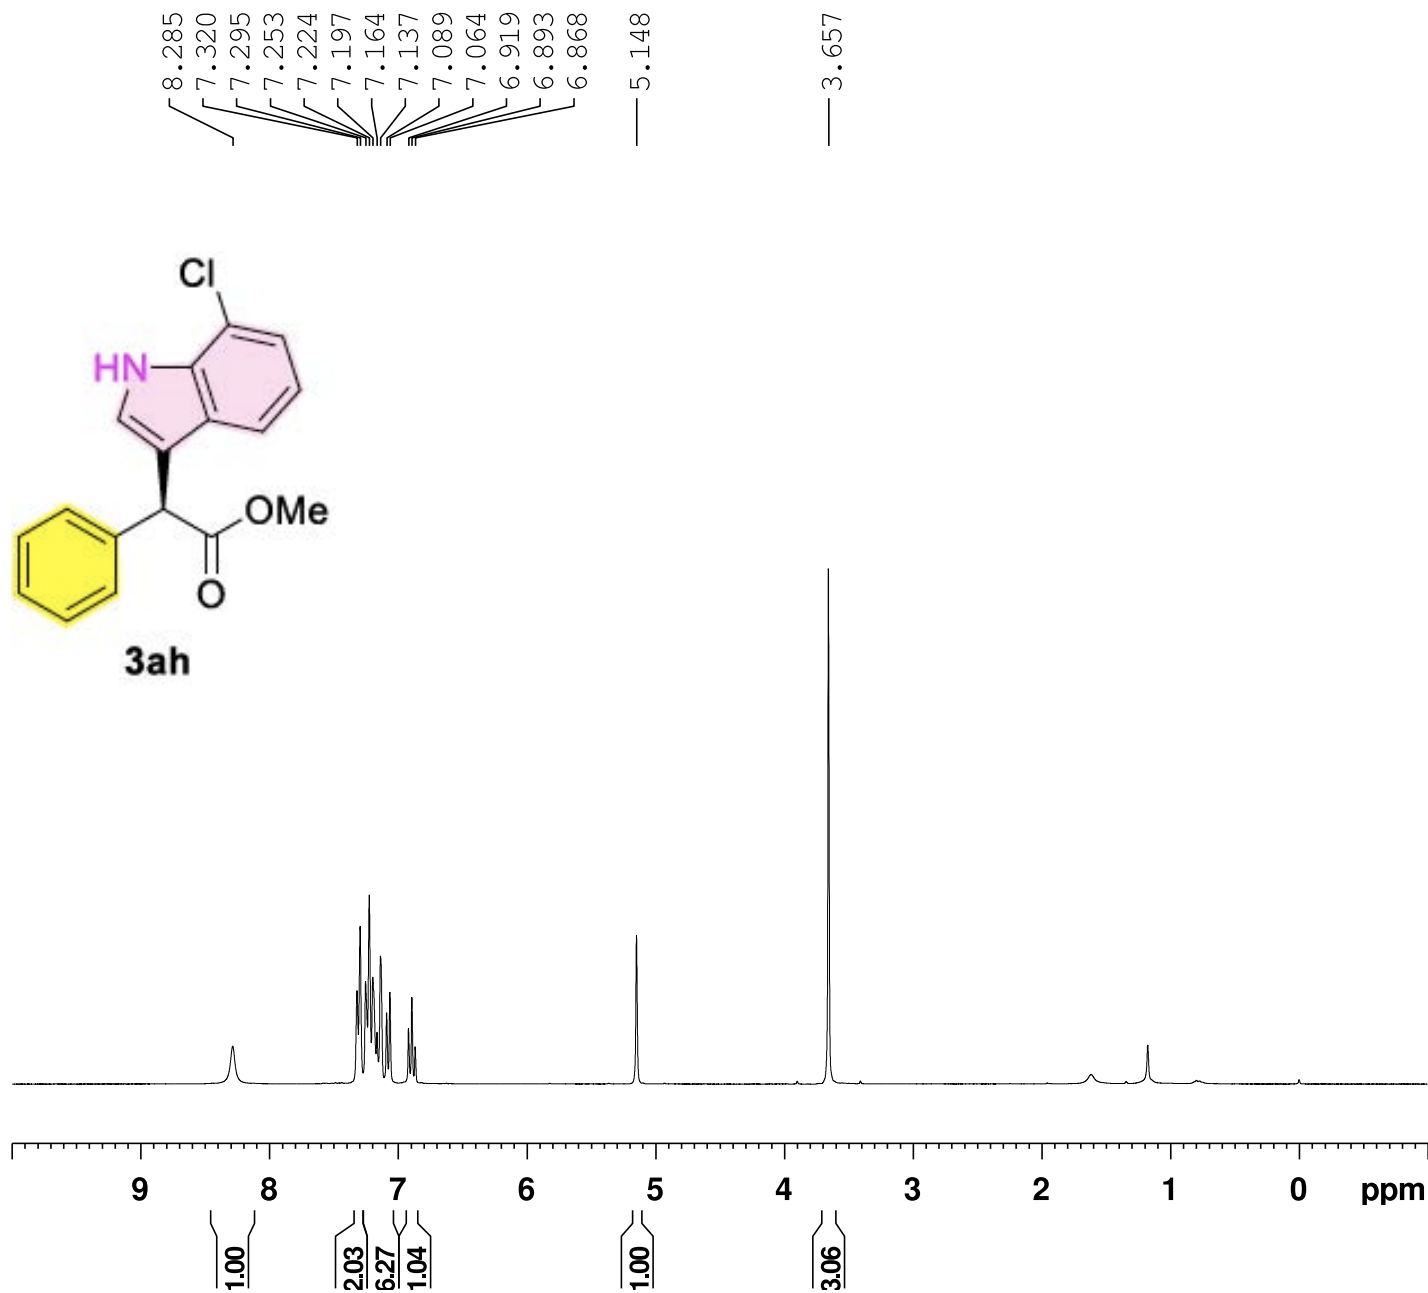



Current Data Parameters  
NAME CNMR-YX-5-p14  
EXPNO 1030  
PROCNO 1

F2 - Acquisition Parameters  
Date\_ 20230706  
Time 1.29  
INSTRUM spect  
PROBHD 5 mm PABBO BB-  
PULPROG zgpg30  
TD 65536  
SOLVENT CDC13  
NS 100  
DS 4  
SWH 18028.846 Hz  
FIDRES 0.275098 Hz  
AQ 1.8175317 sec  
RG 203  
DW 27.733 usec  
DE 6.50 usec  
TE 298.2 K  
D1 2.00000000 sec  
D11 0.03000000 sec  
TD0 1

==== CHANNEL f1 =====  
SFO1 75.4752949 MHz  
NUC1 13C  
P1 9.50 usec  
PLW1 34.20000076 W

==== CHANNEL f2 =====  
SFO2 300.1312005 MHz  
NUC2 1H  
CPDPRG[2] waltz16  
PCPD2 90.00 usec  
PLW2 14.00000000 W  
PLW12 0.17284000 W  
PLW13 0.14000000 W

F2 - Processing parameters  
SI 32768  
SF 75.4677485 MHz  
WDW EM  
SSB 0  
LB 1.00 Hz  
GB 0  
PC 1.40

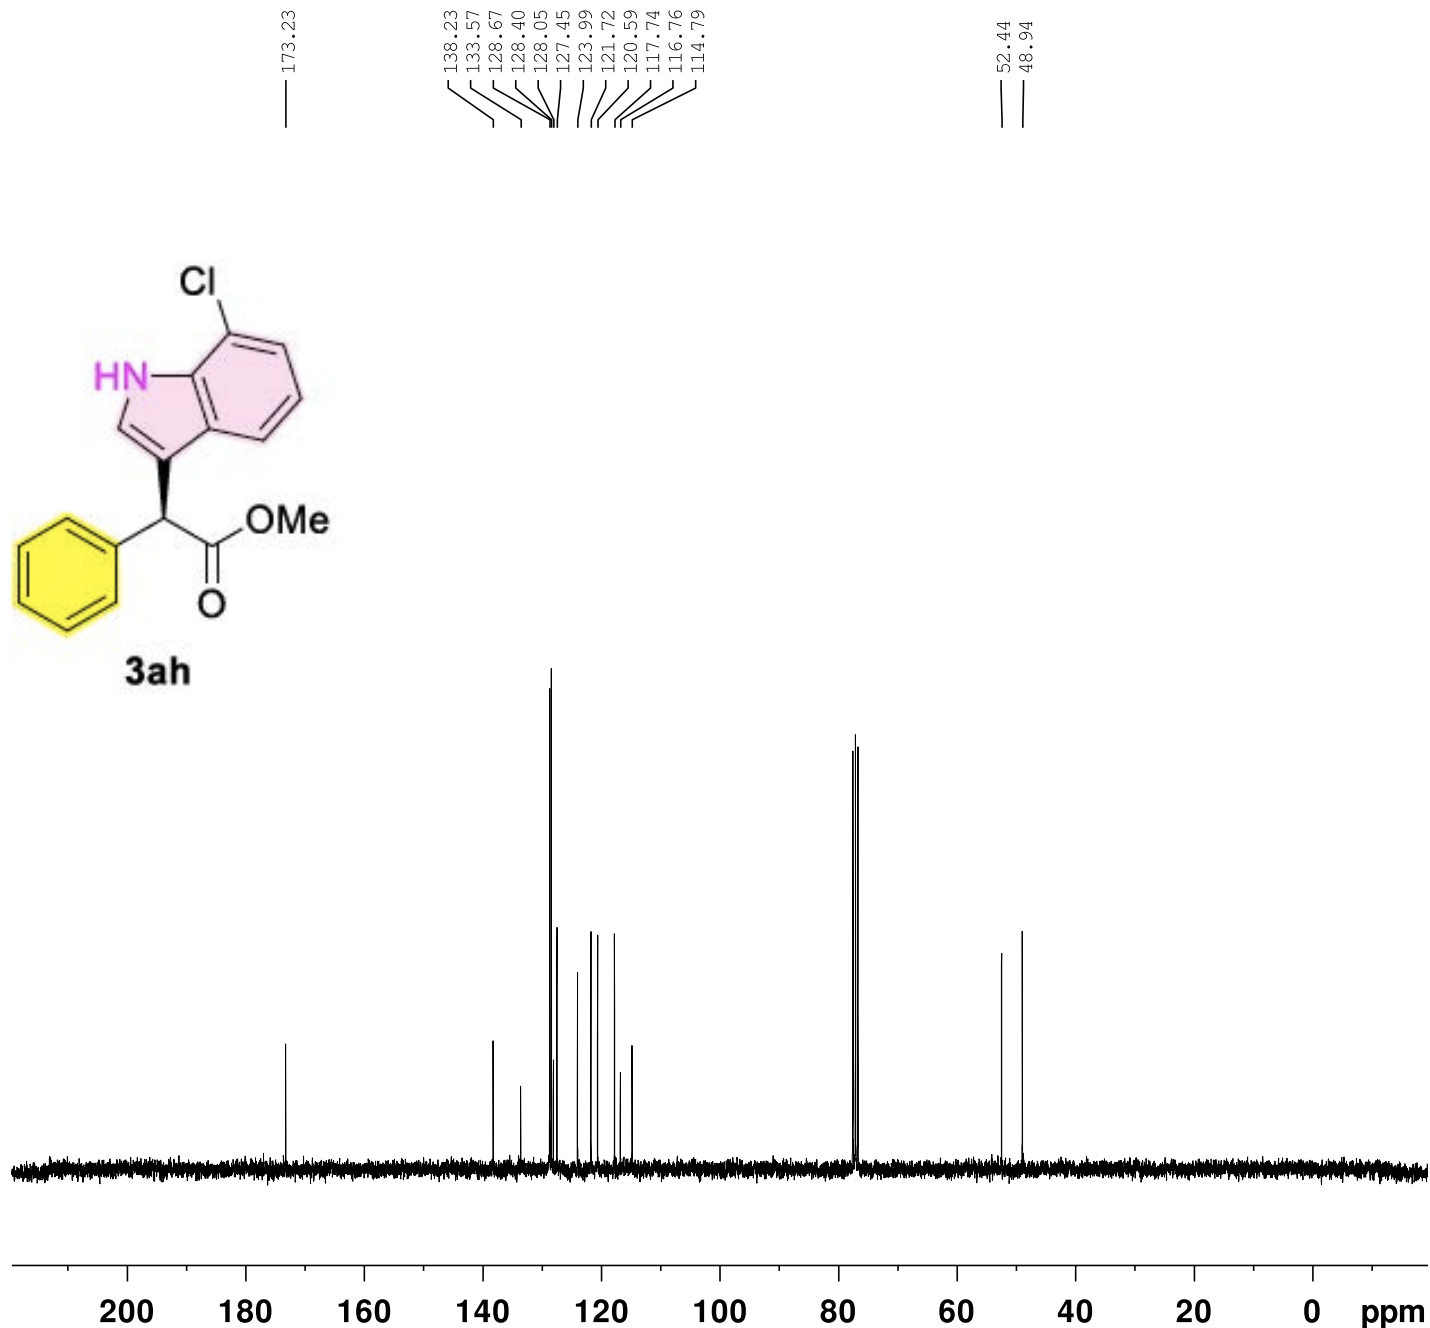





Current Data Parameters  
NAME HNMR-YX-4-p62 (NEW)  
EXPNO 387  
PROCNO 1

F2 - Acquisition Parameters  
Date\_ 20230525  
Time 16.35  
INSTRUM spect  
PROBHD 5 mm PABBO BB-  
PULPROG zg30  
TD 65536  
SOLVENT CDCl3  
NS 16  
DS 2  
SWH 6009.615 Hz  
FIDRES 0.091699 Hz  
AQ 5.4525952 sec  
RG 161  
DW 83.200 usec  
DE 6.50 usec  
TE 293.6 K  
D1 1.00000000 sec  
TD0 1

==== CHANNEL f1 =====  
SFO1 300.1318534 MHz  
NUC1 1H  
P1 10.00 usec  
PLW1 14.00000000 W

F2 - Processing parameters  
SI 65536  
SF 300.1300127 MHz  
WDW EM  
SSB 0  
LB 0.30 Hz  
GB 0  
PC 1.00

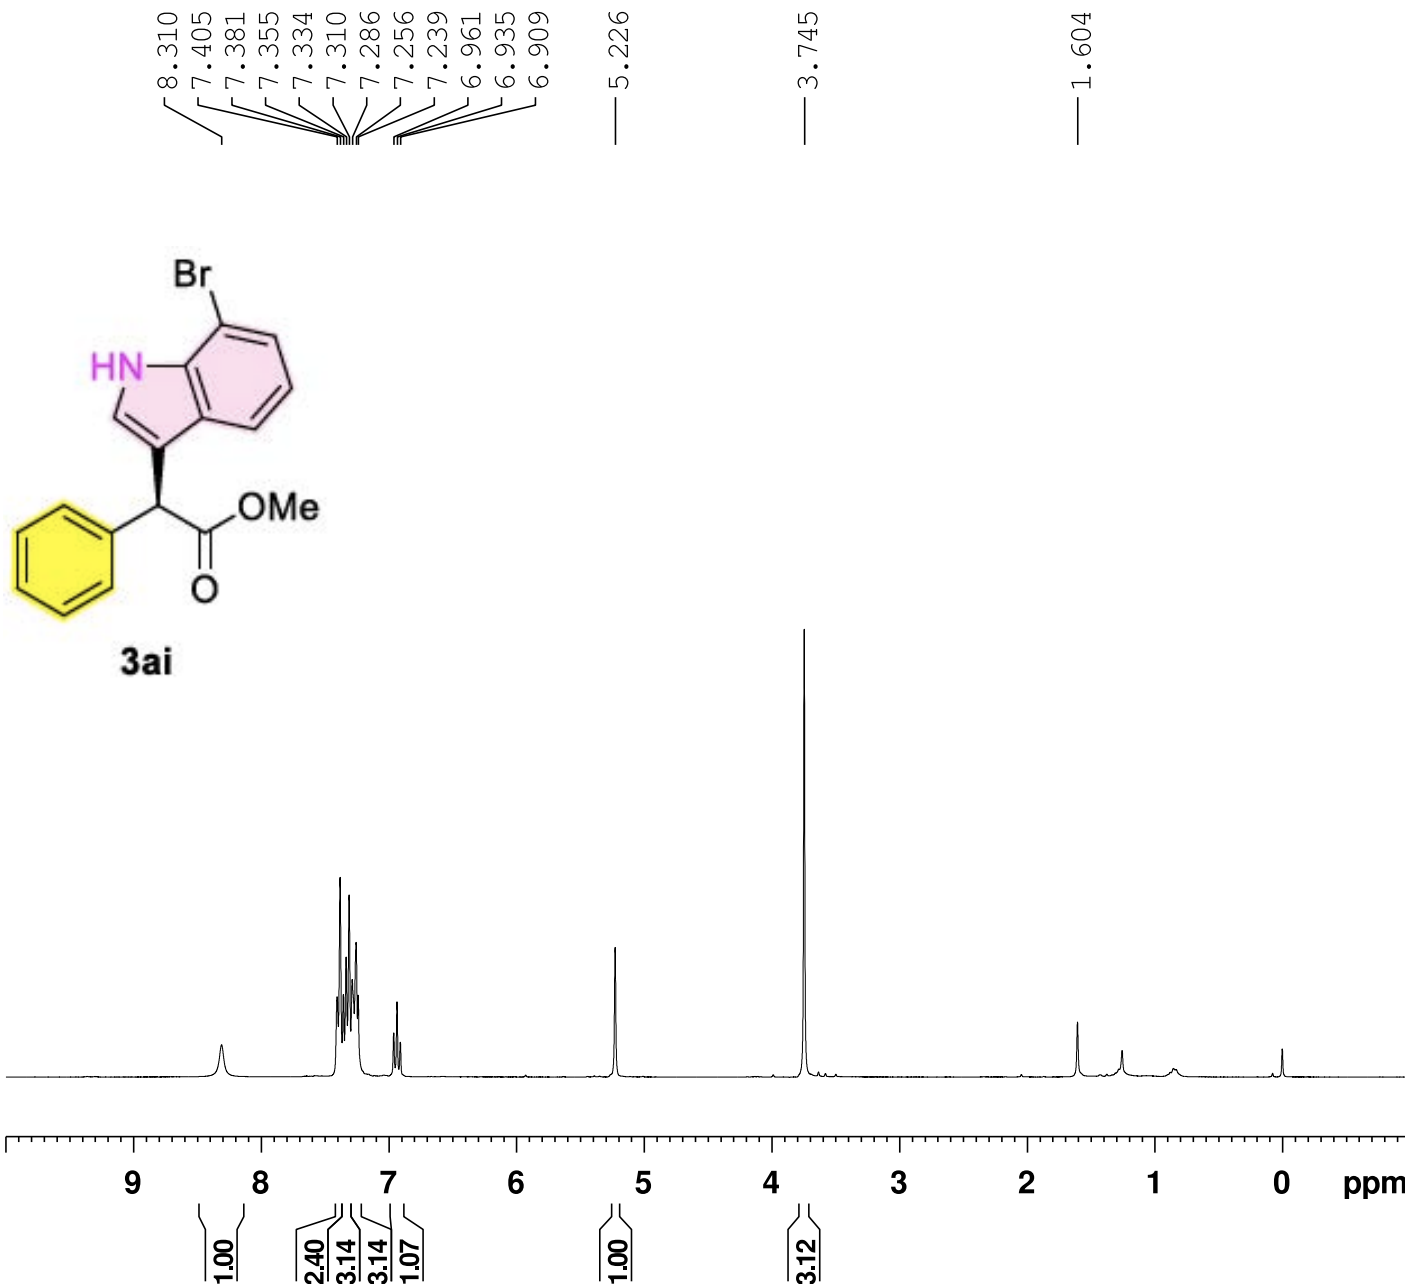



Current Data Parameters  
NAME CNMR-YX-4-p62  
EXPNO 32  
PROCNO 1

F2 - Acquisition Parameters  
Date\_ 20230525  
Time 21.40  
INSTRUM spect  
PROBHD 5 mm PABBO BB-  
PULPROG zgpg30  
TD 65536  
SOLVENT CDC13  
NS 100  
DS 4  
SWH 24038.461 Hz  
FIDRES 0.366798 Hz  
AQ 1.3631488 sec  
RG 193.13  
DW 20.800 usec  
DE 6.50 usec  
TE 291.0 K  
D1 2.00000000 sec  
D11 0.03000000 sec  
TD0 1

==== CHANNEL f1 =====  
NUC1 13C  
P1 12.00 usec  
PLW1 53.00000000 W  
SFO1 100.6379178 MHz

==== CHANNEL f2 =====  
CPDPRG[2] waltz16  
NUC2 1H  
PCPD2 90.00 usec  
PLW2 14.00000000 W  
PLW12 0.37246999 W  
PLW13 0.30170000 W  
SFO2 400.1916008 MHz

F2 - Processing parameters  
SI 32768  
SF 100.6278560 MHz  
WDW EM  
SSB 0  
LB 1.00 Hz  
GB 0  
PC 1.40

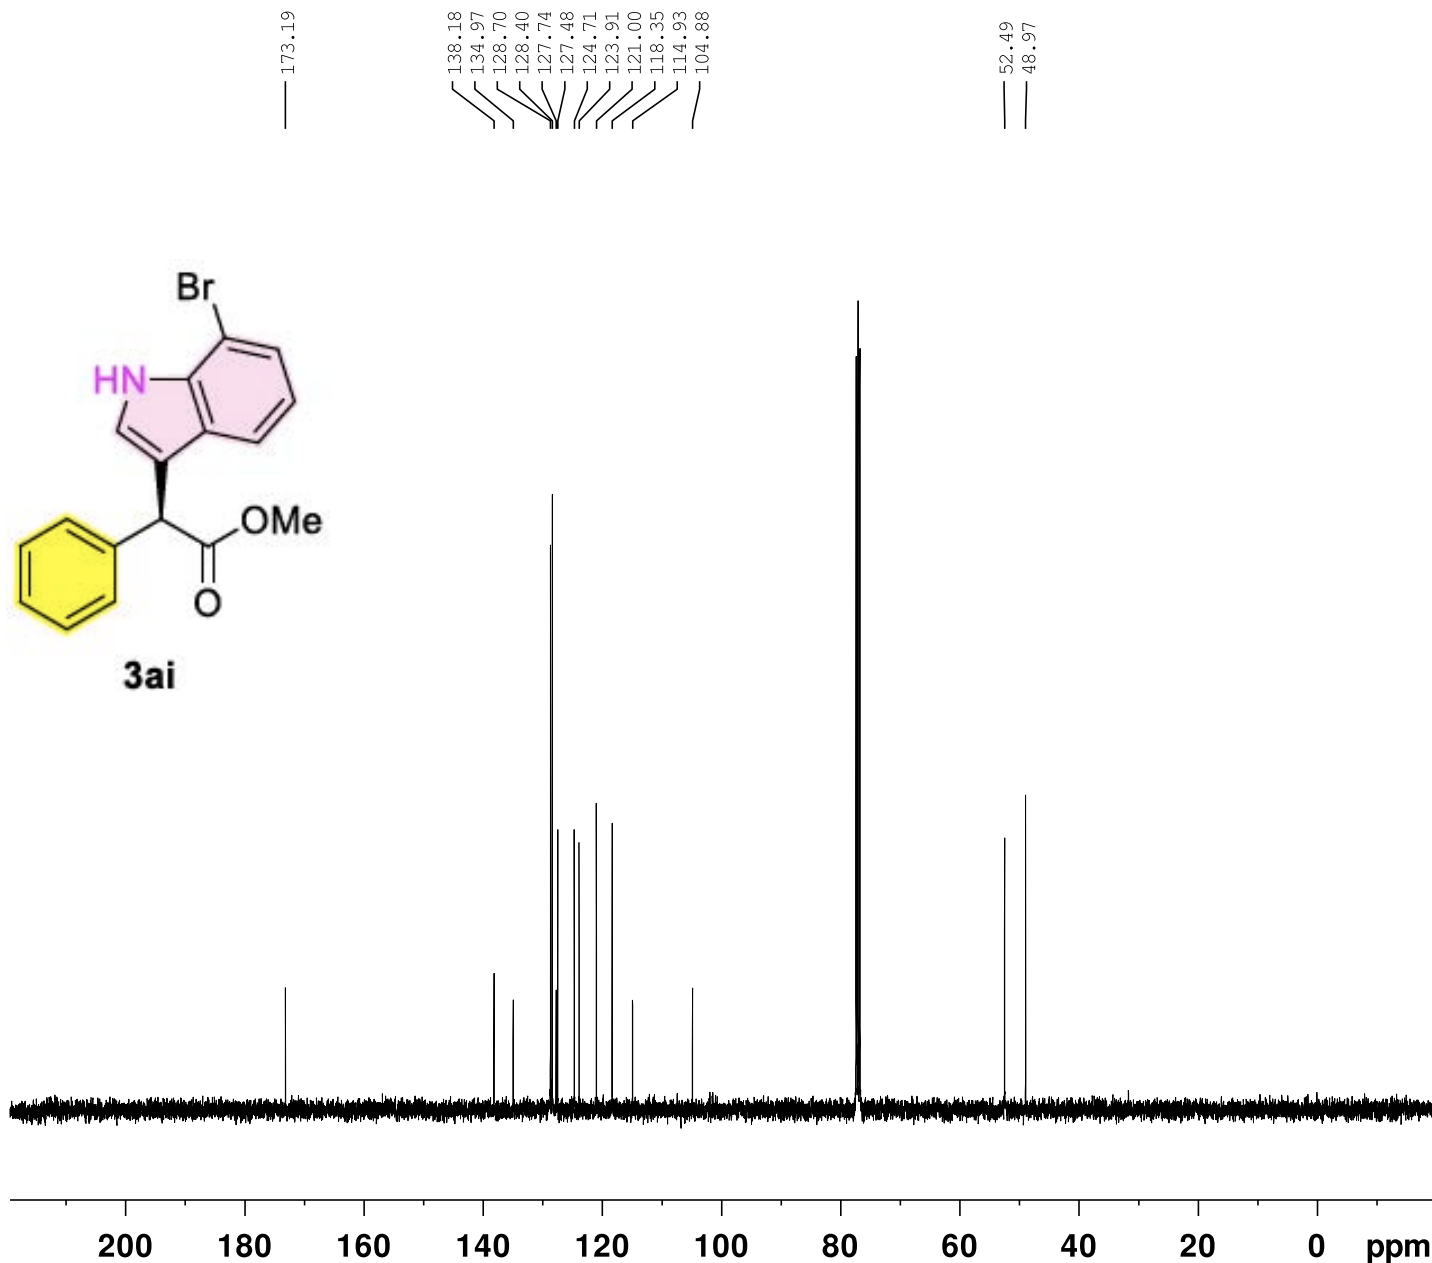



Current Data Parameters  
NAME HNMR-YX-5-p5  
EXPNO 1  
PROCNO 1

F2 - Acquisition Parameters  
Date\_ 20230628  
Time 22.31 h  
INSTRUM Avance  
PROBHD z116098\_0833 (  
PULPROG zg30  
TD 65536  
SOLVENT CDCl3  
NS 16  
DS 2  
SWH 8196.722 Hz  
FIDRES 0.250144 Hz  
AQ 3.9976959 sec  
RG 72.338  
DW 61.000 usec  
DE 13.54 usec  
TE 294.6 K  
D1 1.00000000 sec  
TD0 1  
SFO1 400.1324708 MHz  
NUC1 1H  
P0 3.33 usec  
P1 10.00 usec  
PLW1 20.73200035 W

F2 - Processing parameters  
SI 65536  
SF 400.1300634 MHz  
WDW EM  
SSB 0  
LB 0.30 Hz  
GB 0  
PC 1.00

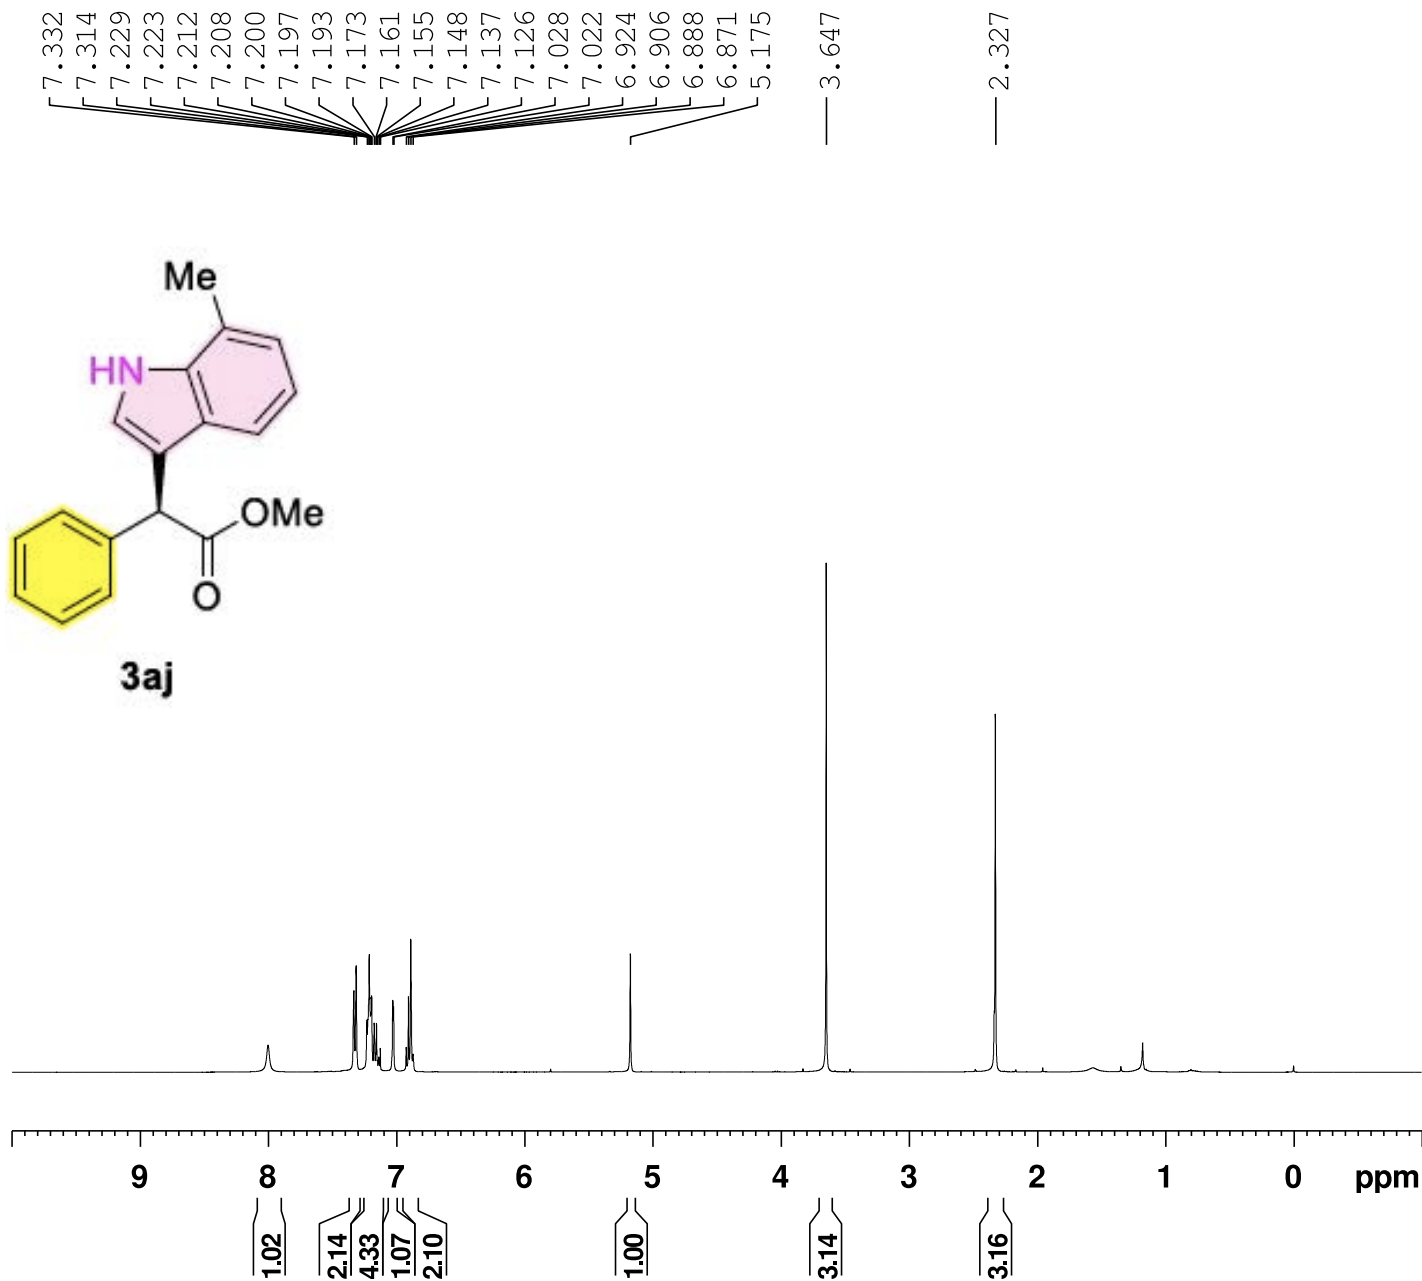



Current Data Parameters  
NAME CNMR-YX-5-p5  
EXPNO 2  
PROCNO 1

F2 - Acquisition Parameters  
Date\_ 20230628  
Time 22.44 h  
INSTRUM Avance  
PROBHD z116098\_0833 (  
PULPROG zgpg30  
TD 65536  
SOLVENT CDC13  
NS 200  
DS 4  
SWH 23809.523 Hz  
FIDRES 0.726609 Hz  
AQ 1.3762560 sec  
RG 51.55  
DW 21.000 usec  
DE 6.50 usec  
TE 295.1 K  
D1 2.00000000 sec  
D11 0.03000000 sec  
TD0 1  
SFO1 100.6228298 MHz  
NUC1 13C  
P0 3.33 usec  
P1 10.00 usec  
PLW1 87.89900208 W  
SFO2 400.1316005 MHz  
NUC2 1H  
CPDPRG[2] waltz65  
PCPD2 90.00 usec  
PLW2 20.73200035 W  
PLW12 0.25595000 W  
PLW13 0.12874000 W

F2 - Processing parameters  
SI 32768  
SF 100.6127685 MHz  
WDW EM  
SSB 0  
LB 1.00 Hz  
GB 0  
PC 1.40

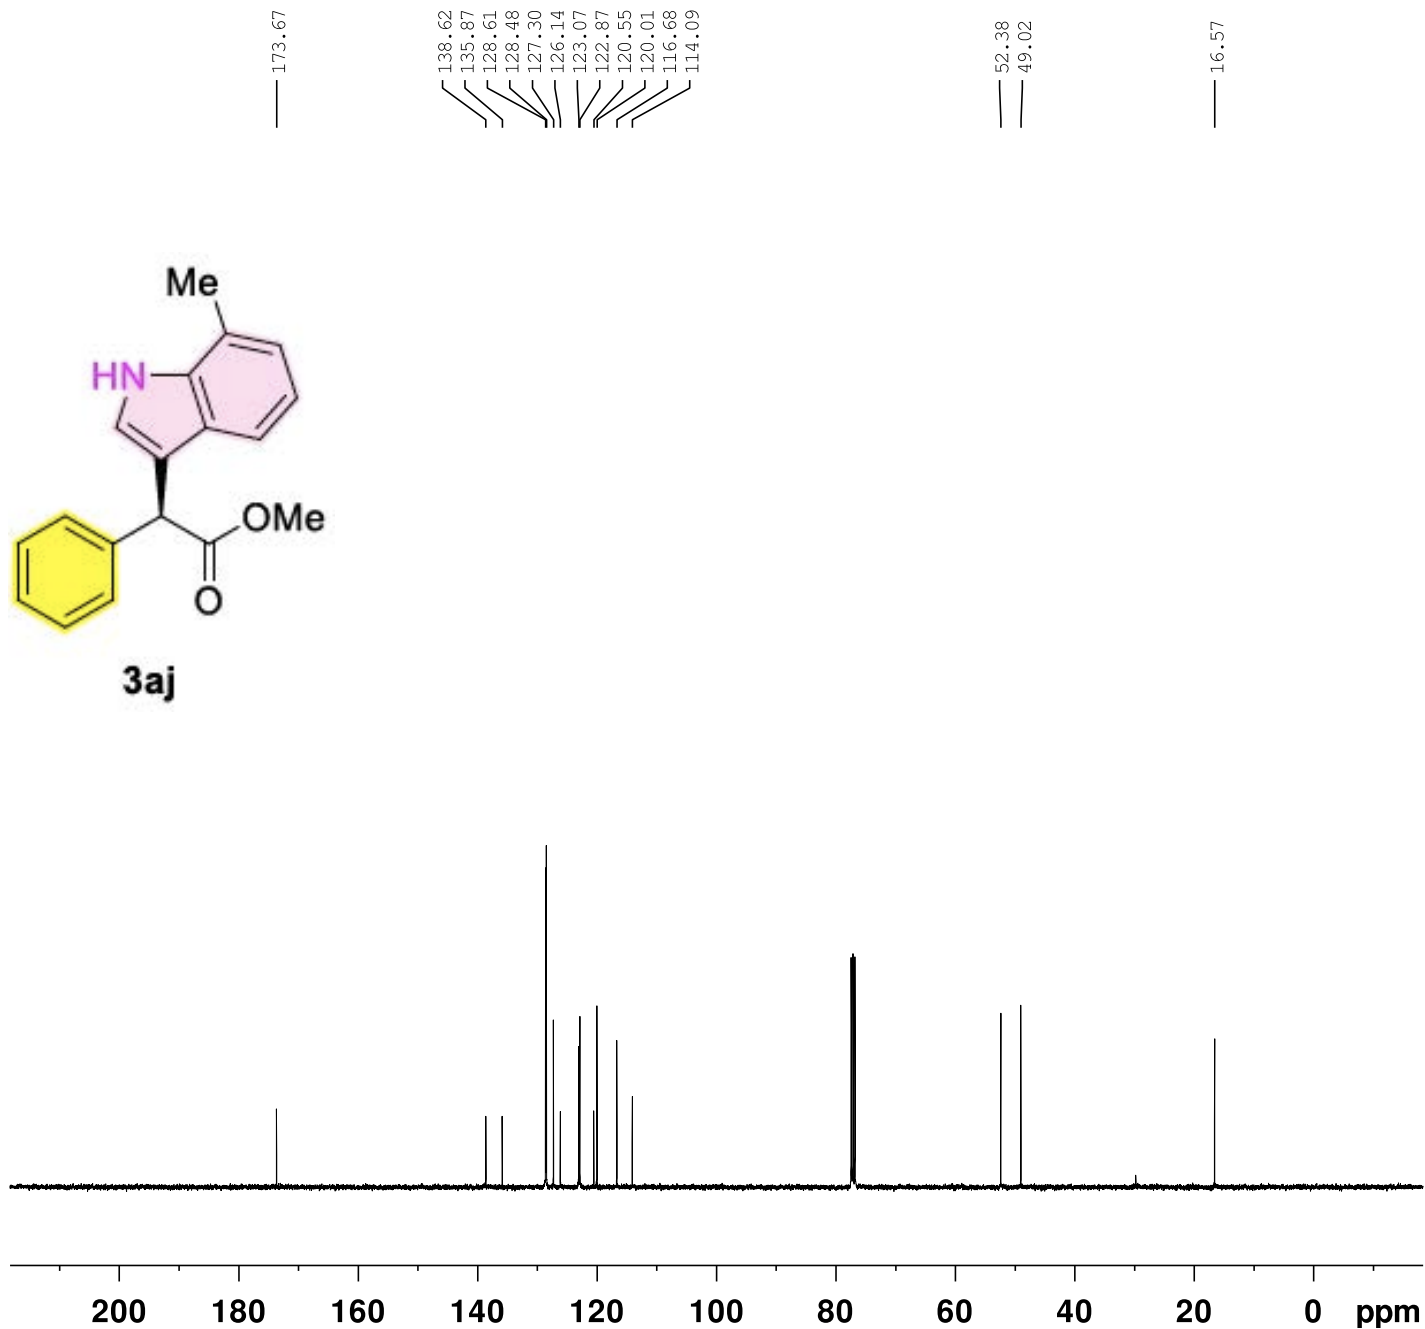



Current Data Parameters  
NAME HNMR-YX-4-p84  
EXPNO 423  
PROCNO 1

F2 - Acquisition Parameters  
Date\_ 20230606  
Time 15.46  
INSTRUM spect  
PROBHD 5 mm PABBO BB-  
PULPROG zg30  
TD 65536  
SOLVENT CDCl3  
NS 16  
DS 2  
SWH 6009.615 Hz  
FIDRES 0.091699 Hz  
AQ 5.4525952 sec  
RG 161  
DW 83.200 usec  
DE 6.50 usec  
TE 296.0 K  
D1 1.00000000 sec  
TD0 1

==== CHANNEL f1 =====  
SFO1 300.1318534 MHz  
NUC1 1H  
P1 10.00 usec  
PLW1 14.00000000 W

F2 - Processing parameters  
SI 65536  
SF 300.1300376 MHz  
WDW EM  
SSB 0  
LB 0.30 Hz  
GB 0  
PC 1.00

7.529  
7.503  
7.434  
7.409  
7.372  
7.347  
7.331  
7.305  
7.279  
7.263  
7.239  
7.214  
7.199  
7.174  
7.156  
7.133  
7.110  
7.095  
7.069  
7.045  
5.212

3.667

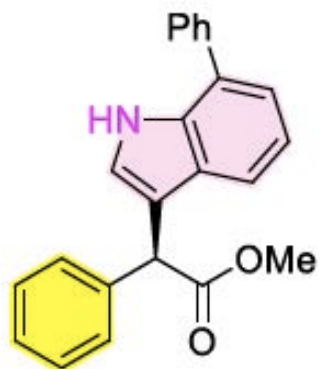

3ak

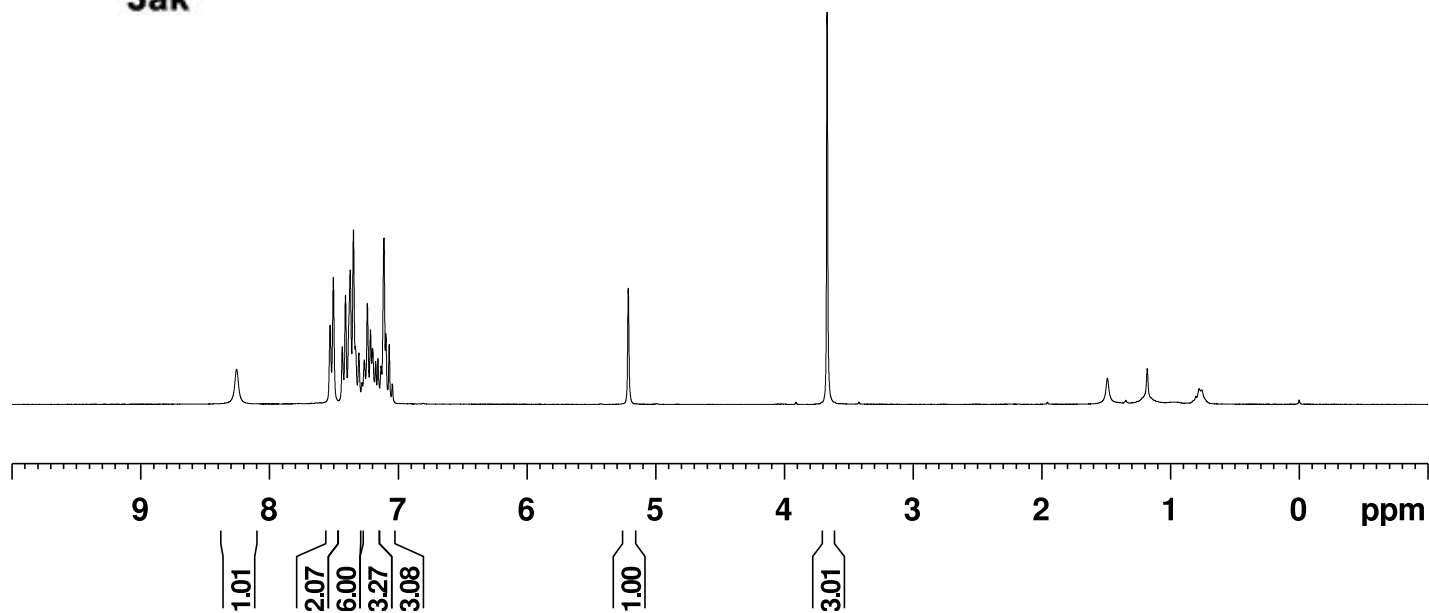



Current Data Parameters  
NAME CNMR-YX-4-p84  
EXPNO 424  
PROCNO 1

F2 - Acquisition Parameters

Date\_ 20230606  
Time 16.01  
INSTRUM spect  
PROBHD 5 mm PABBO BB-  
PULPROG zgpg30  
TD 65536  
SOLVENT CDCl3  
NS 200  
DS 4  
SWH 18028.846 Hz  
FIDRES 0.275098 Hz  
AQ 1.8175317 sec  
RG 203  
DW 27.733 usec  
DE 6.50 usec  
TE 296.7 K  
D1 2.00000000 sec  
D11 0.03000000 sec  
TD0 1

==== CHANNEL f1 =====

SFO1 75.4752949 MHz  
NUC1 13C  
P1 9.50 usec  
PLW1 34.20000076 W

==== CHANNEL f2 =====

SFO2 300.1312005 MHz  
NUC2 1H  
CPDPRG[2] waltz16  
PCPD2 90.00 usec  
PLW2 14.00000000 W  
PLW12 0.17284000 W  
PLW13 0.14000000 W

F2 - Processing parameters

SI 32768  
SF 75.4677485 MHz  
WDW EM  
SSB 0  
LB 1.00 Hz  
GB 0  
PC 1.40

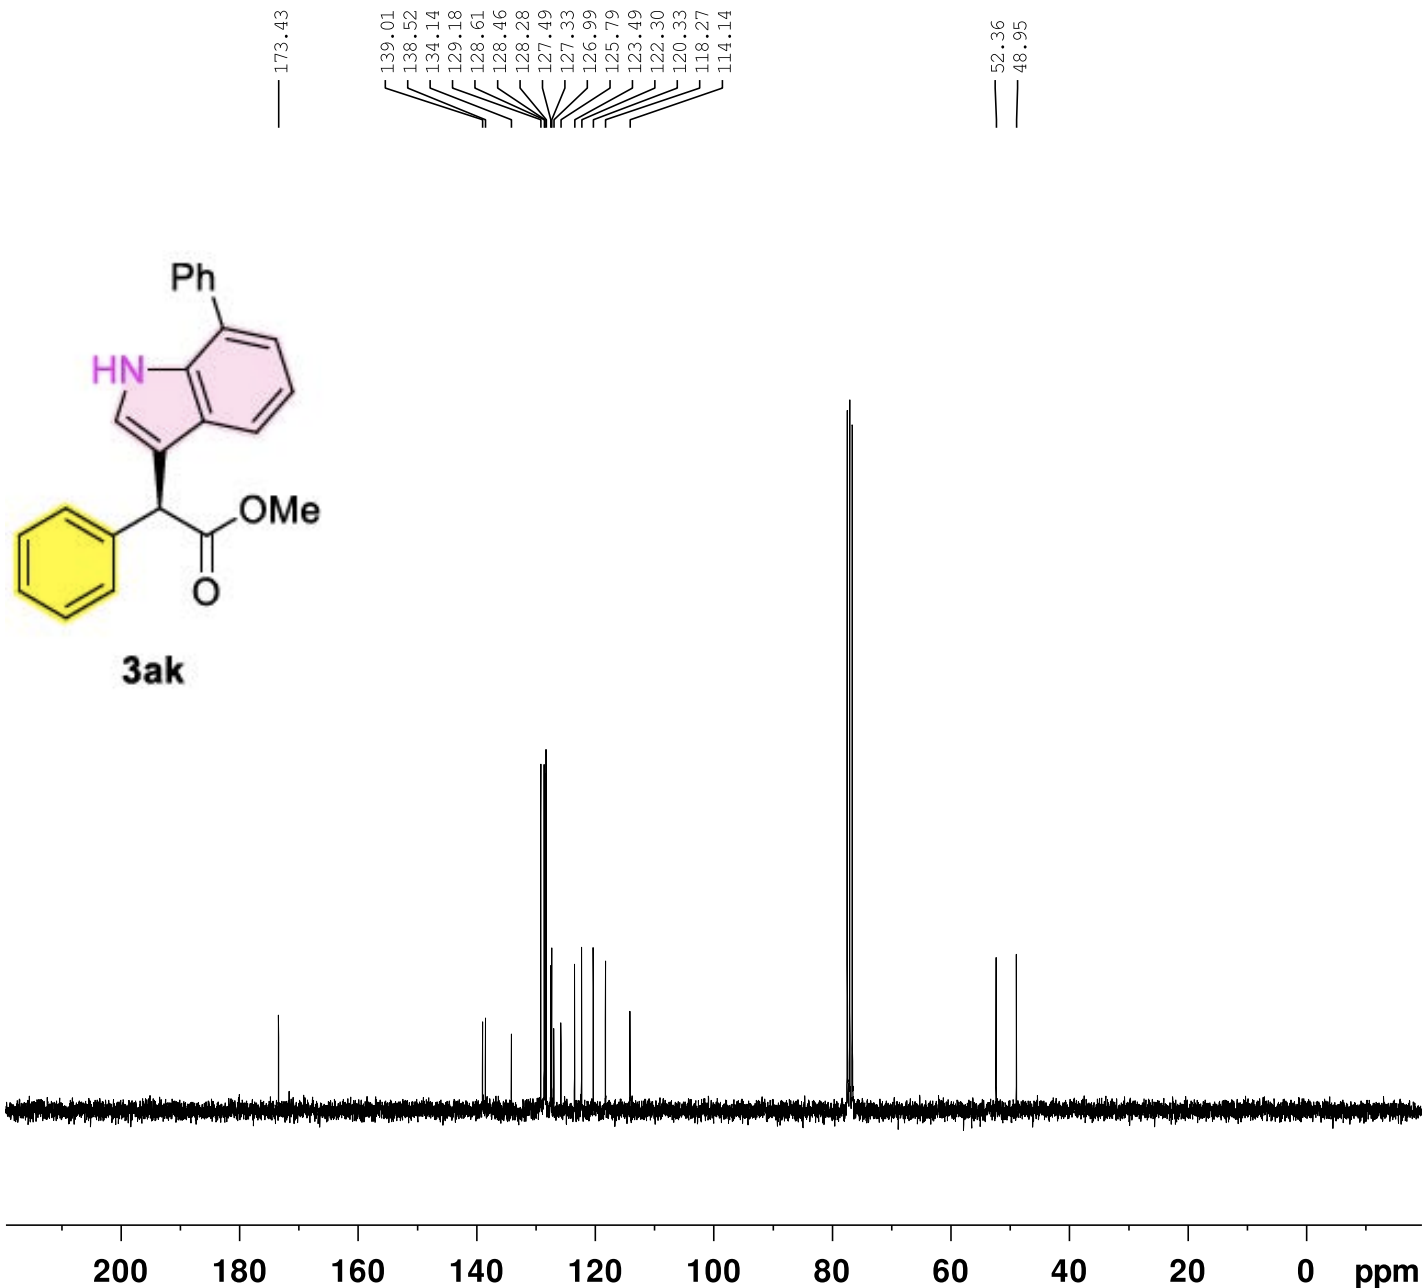



Current Data Parameters  
NAME HNMR-YX-5-p8  
EXPNO 993  
PROCNO 1

F2 - Acquisition Parameters  
Date\_ 20230703  
Time 15.52  
INSTRUM spect  
PROBHD 5 mm PABBO BB-  
PULPROG zg30  
TD 65536  
SOLVENT CDCl3  
NS 16  
DS 2  
SWH 6009.615 Hz  
FIDRES 0.091699 Hz  
AQ 5.4525952 sec  
RG 114  
DW 83.200 usec  
DE 6.50 usec  
TE 298.8 K  
D1 1.00000000 sec  
TD0 1

==== CHANNEL f1 =====  
SFO1 300.1318534 MHz  
NUC1 1H  
P1 10.00 usec  
PLW1 14.00000000 W

F2 - Processing parameters  
SI 65536  
SF 300.1300412 MHz  
WDW EM  
SSB 0  
LB 0.30 Hz  
GB 0  
PC 1.00

8.309  
7.408  
7.331  
7.289  
7.263  
7.229  
7.203  
7.175  
7.140  
7.134

5.067

3.661

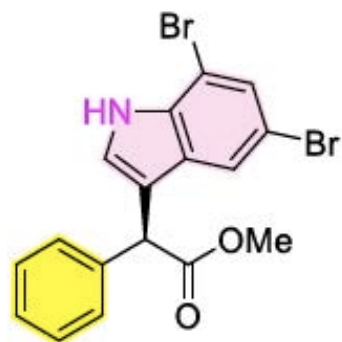

3al

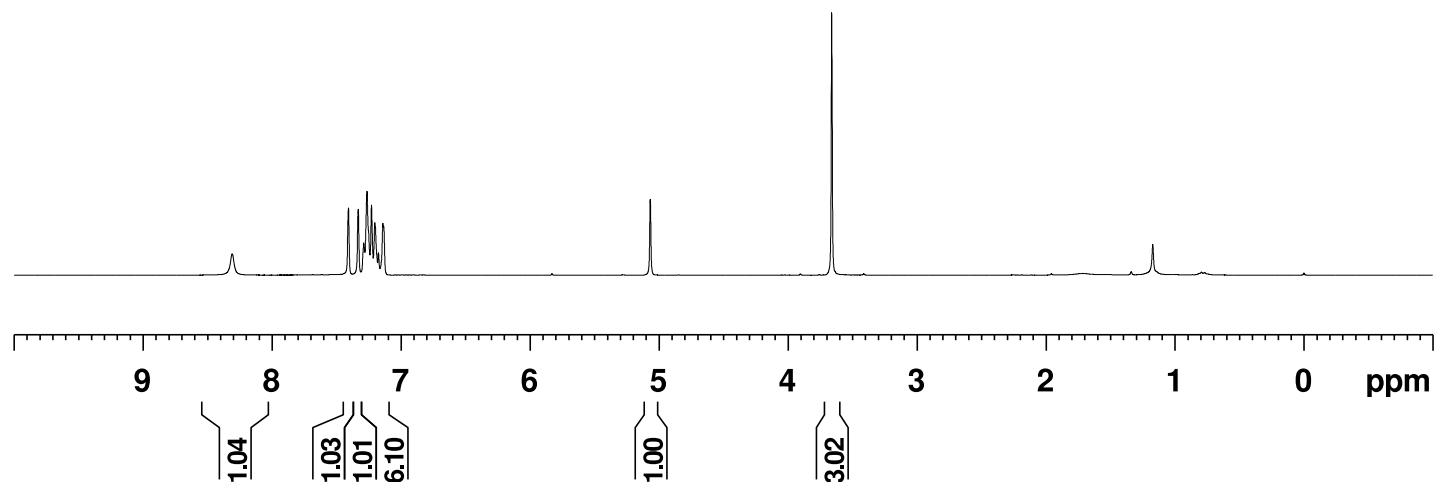



Current Data Parameters  
NAME CNMR-YX-5-p8  
EXPNO 997  
PROCNO 1

F2 - Acquisition Parameters

Date\_ 20230703  
Time 17.16  
INSTRUM spect  
PROBHD 5 mm PABBO BB-  
PULPROG zgpg30  
TD 65536  
SOLVENT CDC13  
NS 150  
DS 4  
SWH 18028.846 Hz  
FIDRES 0.275098 Hz  
AQ 1.8175317 sec  
RG 203  
DW 27.733 usec  
DE 6.50 usec  
TE 299.3 K  
D1 2.00000000 sec  
D11 0.03000000 sec  
TD0 1

==== CHANNEL f1 =====

SFO1 75.4752949 MHz  
NUC1 13C  
P1 9.50 usec  
PLW1 34.20000076 W

==== CHANNEL f2 =====

SFO2 300.1312005 MHz  
NUC2 1H  
CPDPRG[2] waltz16  
PCPD2 90.00 usec  
PLW2 14.00000000 W  
PLW12 0.17284000 W  
PLW13 0.14000000 W

F2 - Processing parameters

SI 32768  
SF 75.4677485 MHz  
WDW EM  
SSB 0  
LB 1.00 Hz  
GB 0  
PC 1.40

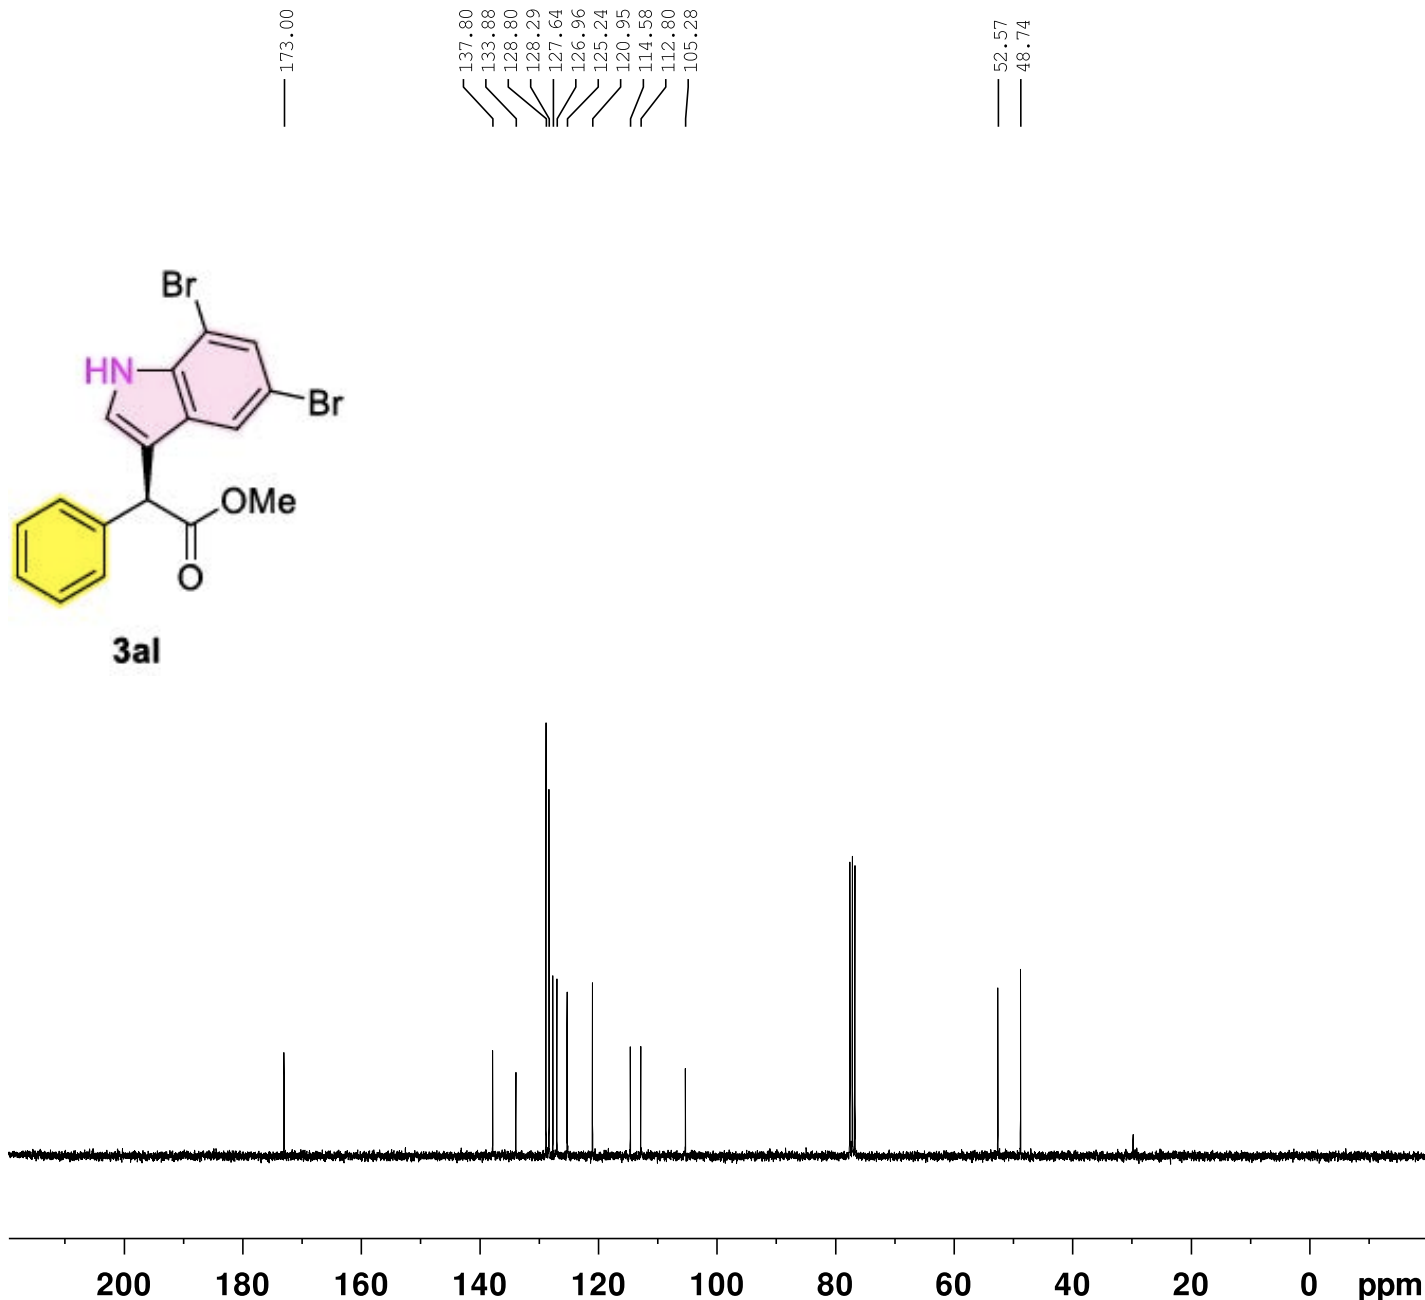





Current Data Parameters  
NAME HNMR-YX-5-p60  
EXPNO 1181  
PROCNO 1

F2 - Acquisition Parameters

Date\_ 20230803  
Time 21.31  
INSTRUM spect  
PROBHD 5 mm PABBO BB-  
PULPROG zg30  
TD 65536  
SOLVENT CDCl3  
NS 16  
DS 2  
SWH 6009.615 Hz  
FIDRES 0.091699 Hz  
AQ 5.4525952 sec  
RG 114  
DW 83.200 usec  
DE 6.50 usec  
TE 298.1 K  
D1 1.00000000 sec  
TD0 1

==== CHANNEL f1 =====  
SFO1 300.1318534 MHz  
NUC1 1H  
P1 10.00 usec  
PLW1 14.00000000 W

F2 - Processing parameters  
SI 65536  
SF 300.1300456 MHz  
WDW EM  
SSB 0  
LB 0.30 Hz  
GB 0  
PC 1.00

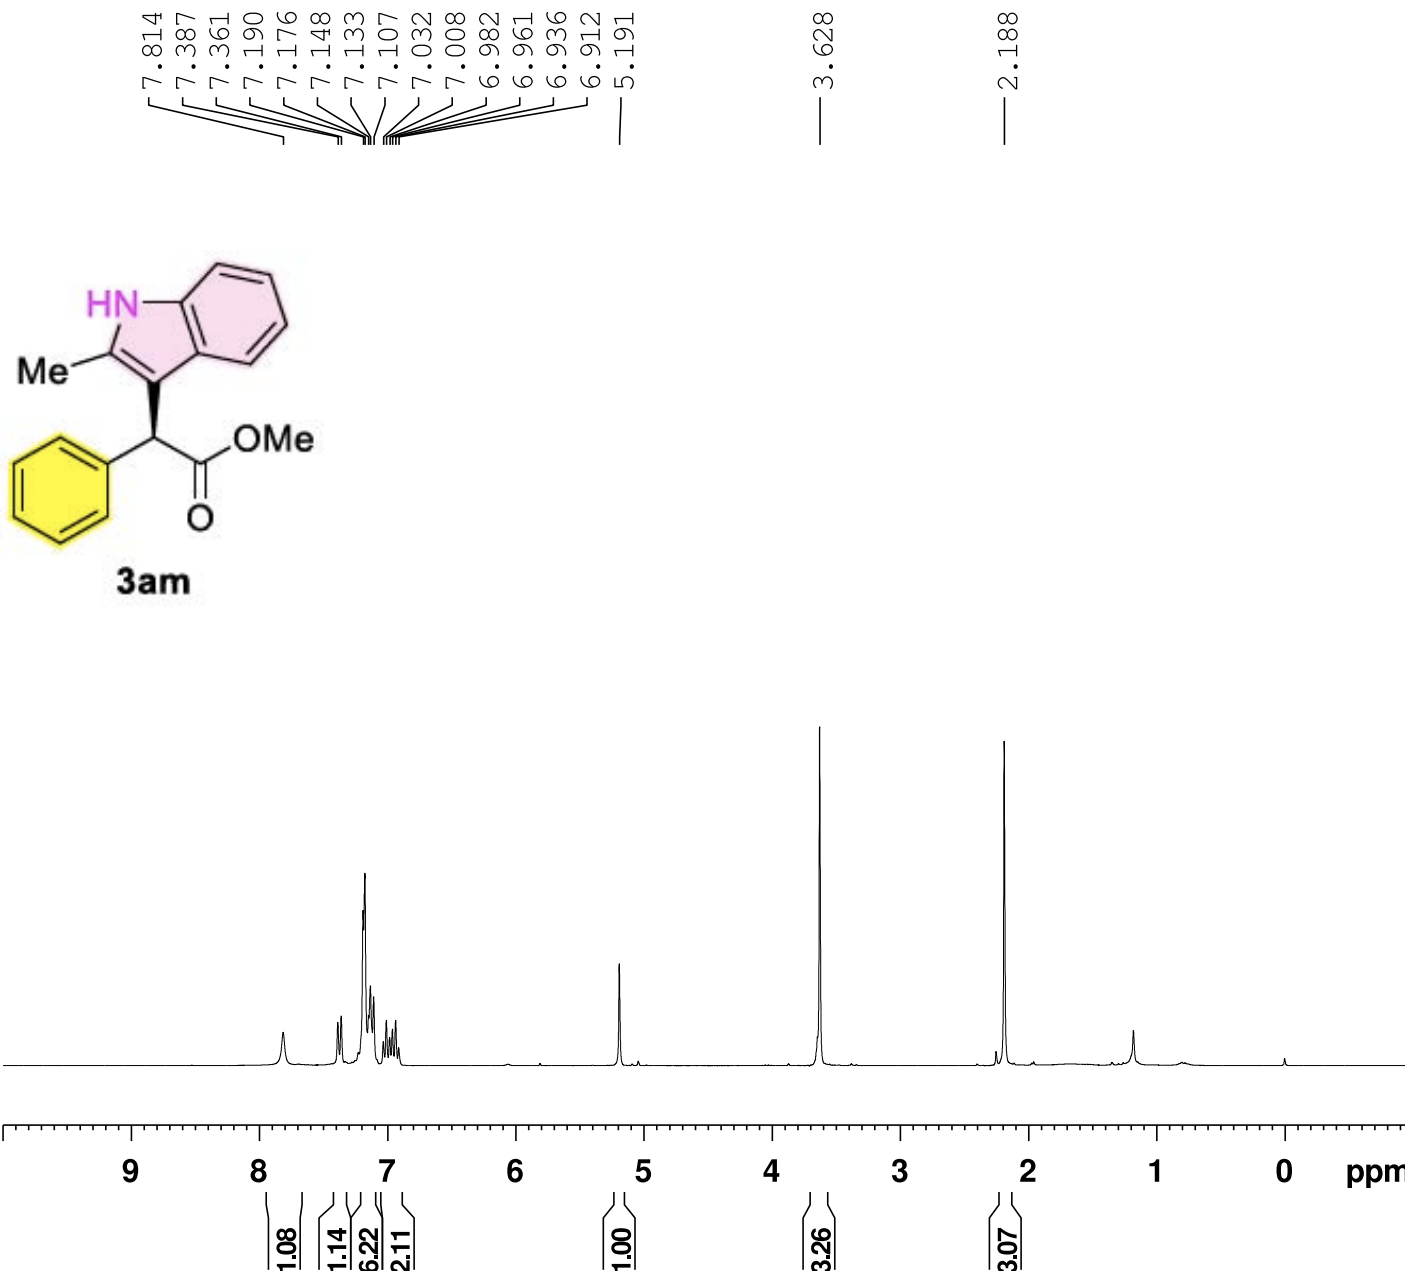



Current Data Parameters  
NAME CNMR-YX-5-p60  
EXPNO 2003  
PROCNO 1

F2 - Acquisition Parameters

Date\_ 20230804  
Time 16.05  
INSTRUM spect  
PROBHD 5 mm PABBO BB-  
PULPROG zgpg30  
TD 65536  
SOLVENT CDCl3  
NS 50  
DS 4  
SWH 18028.846 Hz  
FIDRES 0.275098 Hz  
AQ 1.8175317 sec  
RG 203  
DW 27.733 usec  
DE 6.50 usec  
TE 298.3 K  
D1 2.00000000 sec  
D11 0.03000000 sec  
TD0 1

==== CHANNEL f1 =====  
SFO1 75.4752949 MHz  
NUC1 13C  
P1 9.50 usec  
PLW1 34.20000076 W

==== CHANNEL f2 =====  
SFO2 300.1312005 MHz  
NUC2 1H  
CPDPRG[2] waltz16  
PCPD2 90.00 usec  
PLW2 14.00000000 W  
PLW12 0.17284000 W  
PLW13 0.14000000 W

F2 - Processing parameters  
SI 32768  
SF 75.4677485 MHz  
WDW EM  
SSB 0  
LB 1.00 Hz  
GB 0  
PC 1.40

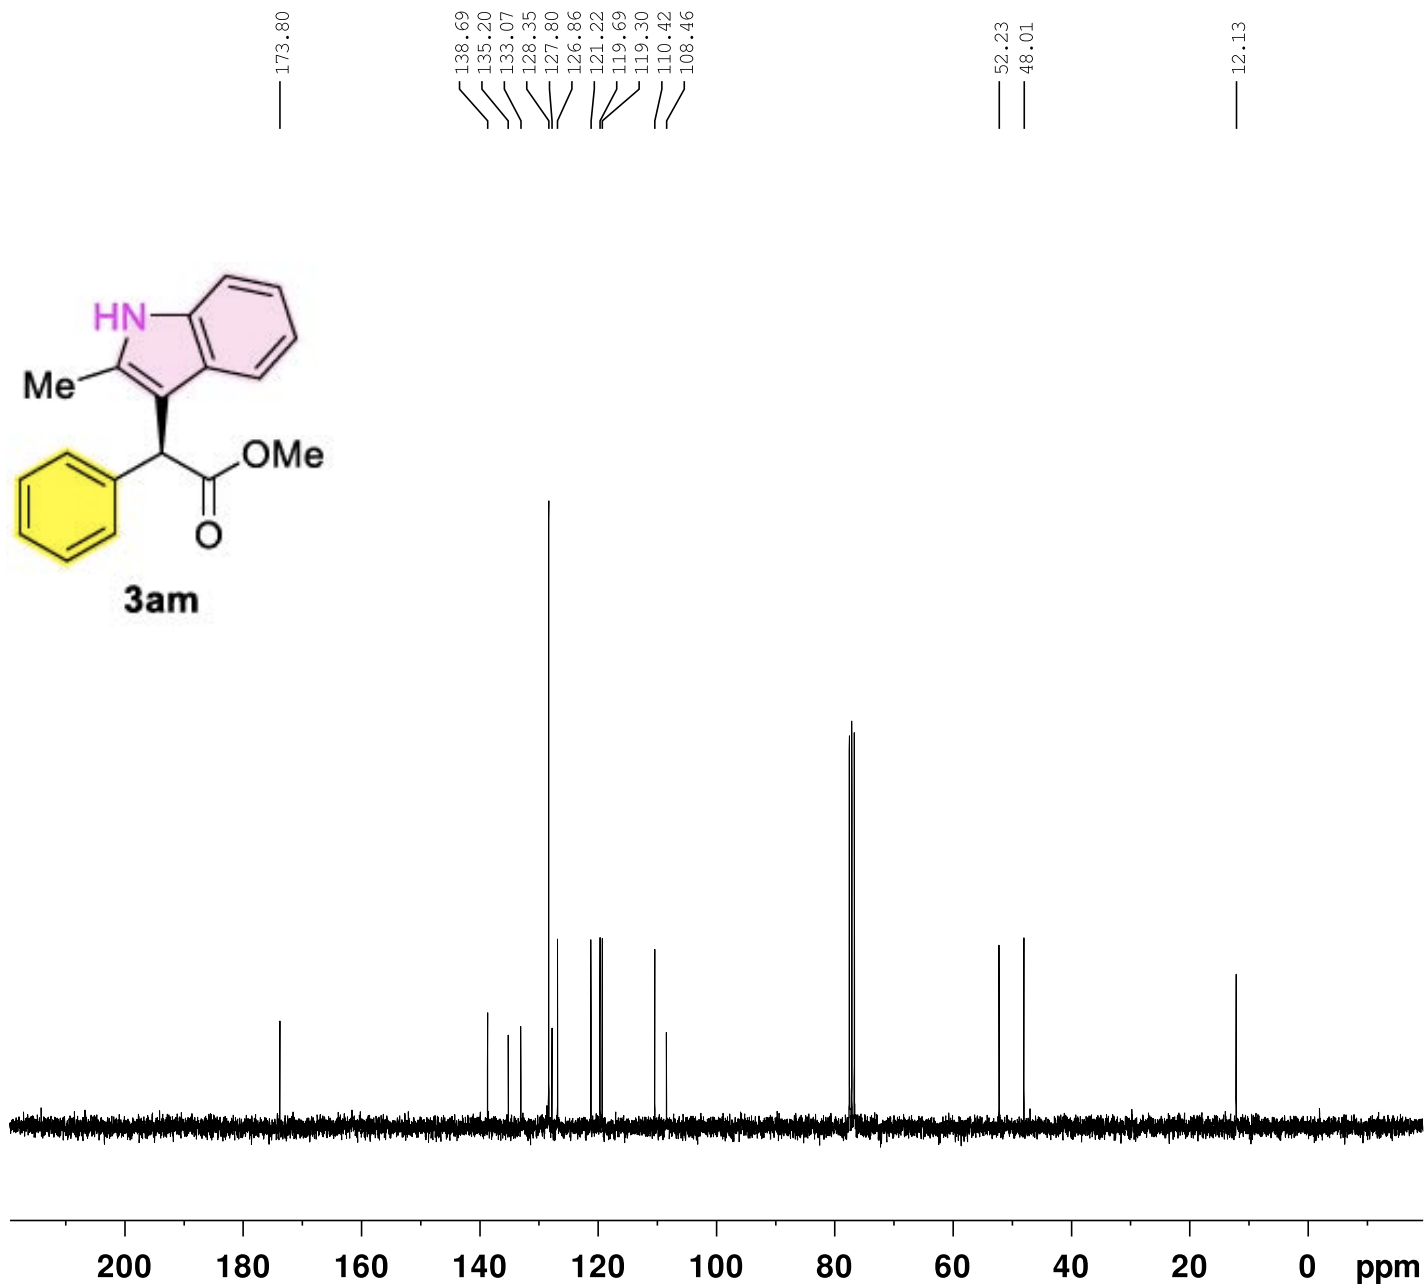



Current Data Parameters  
NAME HNMR-YX-7-p14  
EXPNO 17  
PROCNO 1

F2 - Acquisition Parameters  
Date\_ 20231101  
Time 15.07  
INSTRUM spect  
PROBHD 5 mm PADUL 13C  
PULPROG zg30  
TD 65536  
SOLVENT CDCl3  
NS 4  
DS 2  
SWH 8223.685 Hz  
FIDRES 0.125483 Hz  
AQ 3.9845889 sec  
RG 75.43  
DW 60.800 usec  
DE 6.50 usec  
TE 291.4 K  
D1 1.00000000 sec  
TD0 1

=====  
CHANNEL f1  
NUC1 1H  
P1 9.90 usec  
PLW1 23.00000000 W  
SFO1 400.1924713 MHz

F2 - Processing parameters  
SI 65536  
SF 400.1900255 MHz  
WDW EM  
SSB 0  
LB 0.30 Hz  
GB 0  
PC 1.00

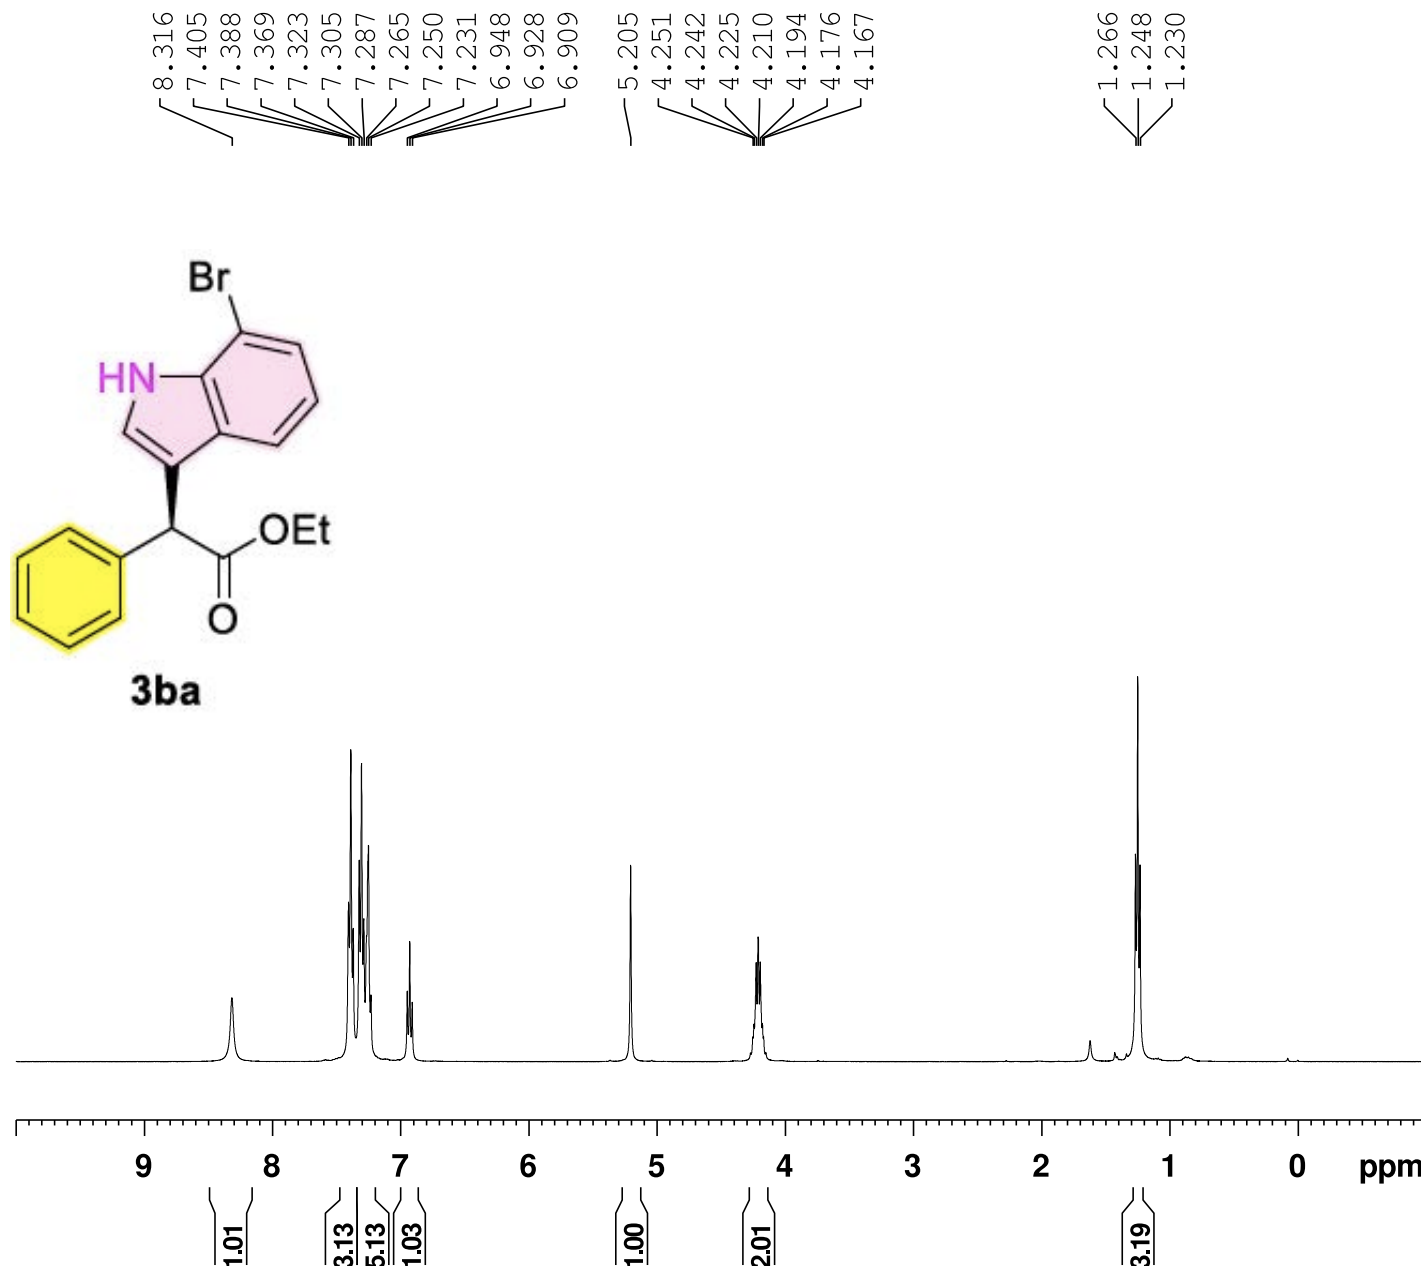



Current Data Parameters  
NAME CNMR-YX-7-p14  
EXPNO 18  
PROCNO 1

F2 - Acquisition Parameters

Date\_ 20231101  
Time 15.14  
INSTRUM spect  
PROBHD 5 mm PADUL 13C  
PULPROG zgpg30  
TD 65536  
SOLVENT CDC13  
NS 100  
DS 4  
SWH 24038.461 Hz  
FIDRES 0.366798 Hz  
AQ 1.3631488 sec  
RG 29.75  
DW 20.800 usec  
DE 6.50 usec  
TE 291.9 K  
D1 2.00000000 sec  
D11 0.03000000 sec  
TD0 1

==== CHANNEL f1 =====

NUC1 13C  
P1 9.80 usec  
PLW1 47.40000153 W  
SFO1 100.6379178 MHz

==== CHANNEL f2 =====

CPDPRG[2] waltz16  
NUC2 1H  
PCPD2 90.00 usec  
PLW2 23.00000000 W  
PLW12 0.30712000 W  
PLW13 0.24877000 W  
SFO2 400.1916008 MHz

F2 - Processing parameters

SI 32768  
SF 100.6278560 MHz  
WDW EM  
SSB 0  
LB 1.00 Hz  
GB 0  
PC 1.40

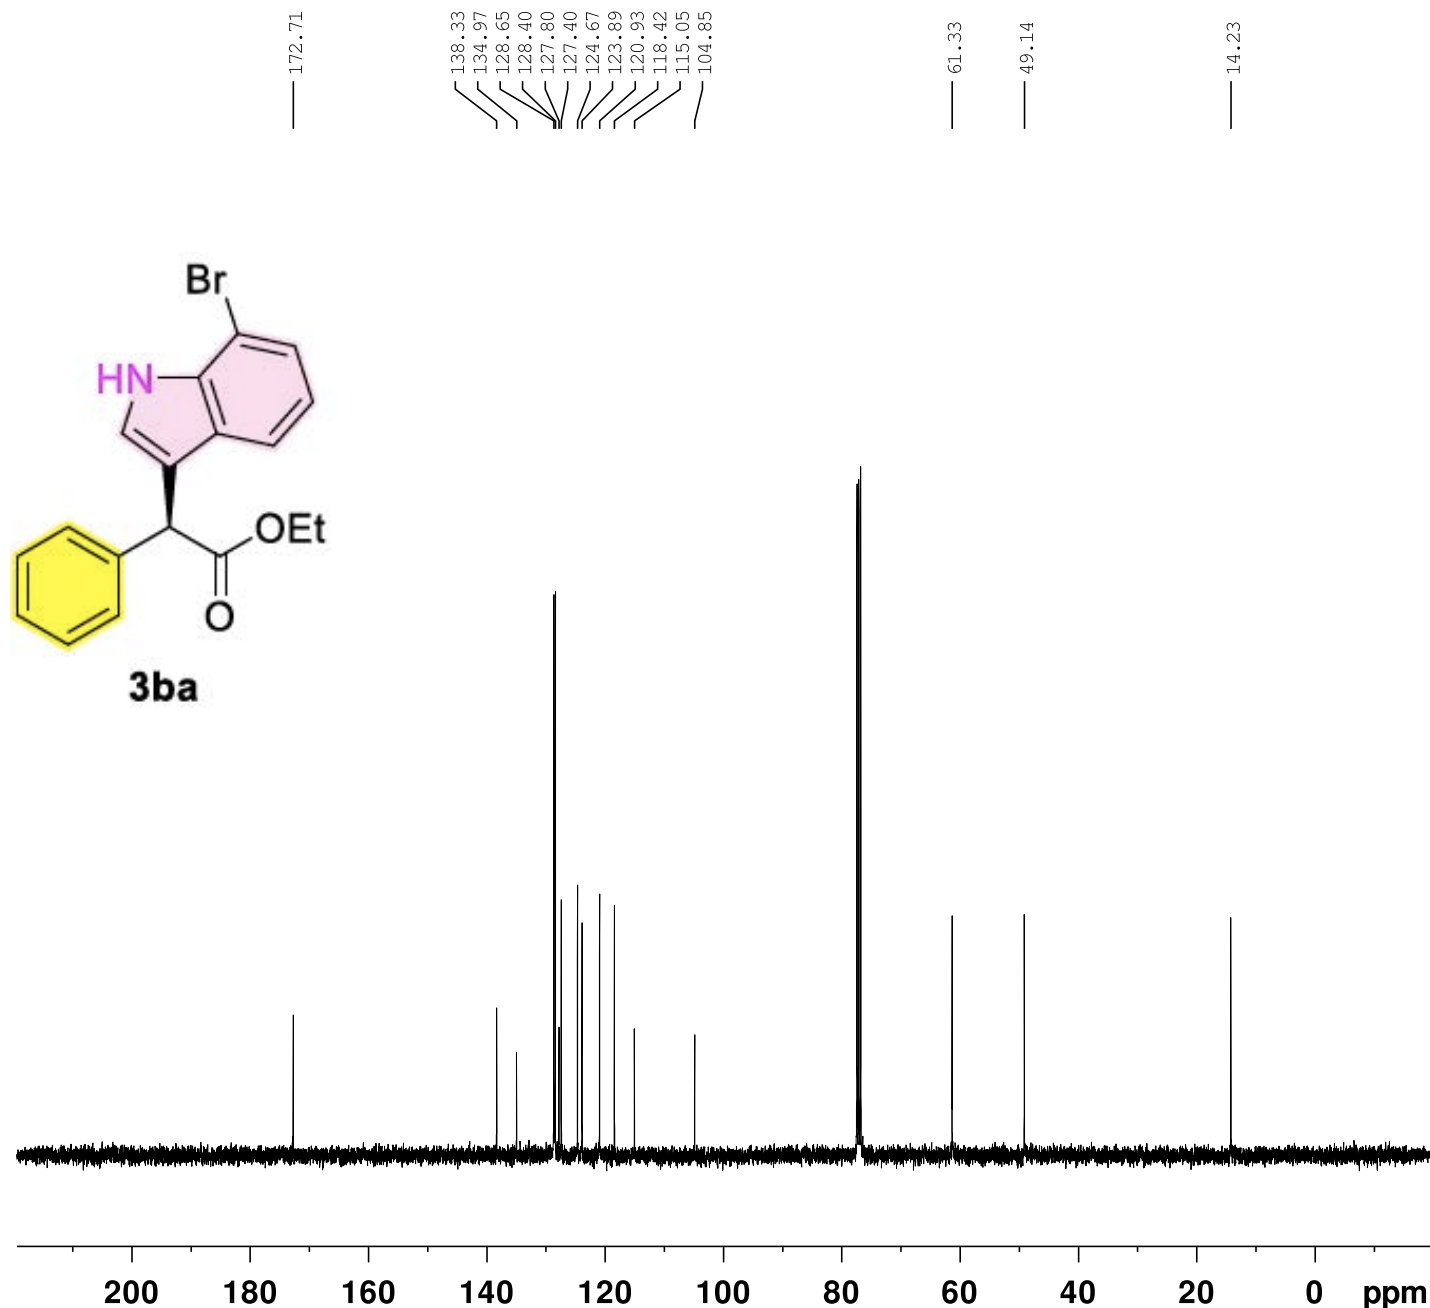



Current Data Parameters  
NAME HNMR-YX-7-p15  
EXPNO 36  
PROCNO 1

F2 - Acquisition Parameters  
Date\_ 20231109  
Time 15.57  
INSTRUM spect  
PROBHD 5 mm PADUL 13C  
PULPROG zg30  
TD 65536  
SOLVENT CDCl3  
NS 4  
DS 2  
SWH 8223.685 Hz  
FIDRES 0.125483 Hz  
AQ 3.9845889 sec  
RG 68.24  
DW 60.800 usec  
DE 6.50 usec  
TE 294.0 K  
D1 1.00000000 sec  
TD0 1

=====  
CHANNEL f1  
NUC1 1H  
P1 9.90 usec  
PLW1 23.00000000 W  
SFO1 400.1924713 MHz

F2 - Processing parameters  
SI 65536  
SF 400.1900332 MHz  
WDW EM  
SSB 0  
LB 0.30 Hz  
GB 0  
PC 1.00

8.265  
7.386  
7.368  
7.318  
7.304  
7.300  
7.287  
7.267  
7.258  
7.247  
7.242  
7.212  
7.199  
7.194  
6.902  
6.883  
6.863  
5.261  
5.223  
5.192  
5.169  
5.138

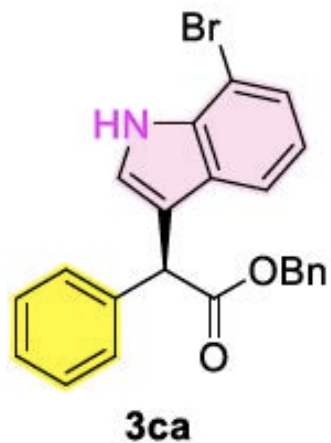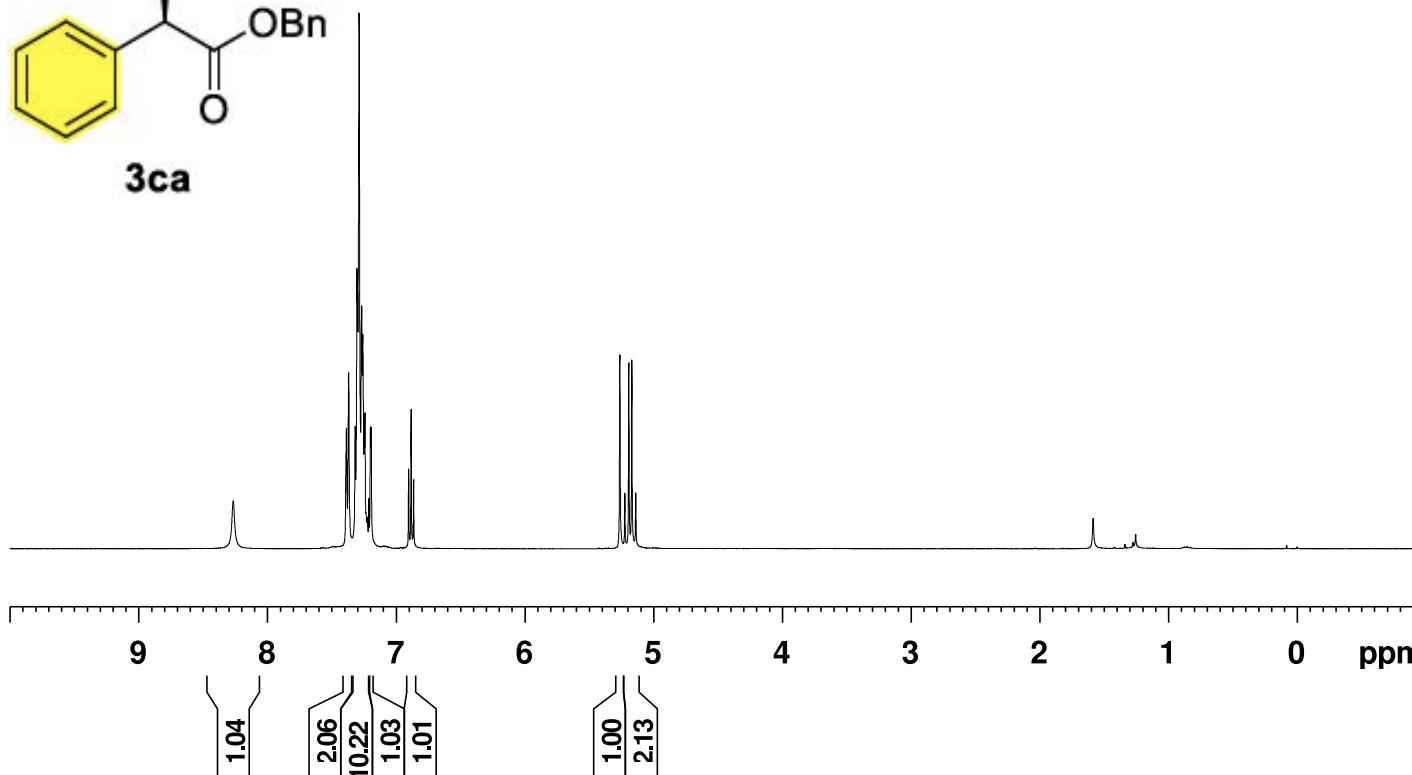



Current Data Parameters  
NAME CNMR-YX-7-p15  
EXPNO 37  
PROCNO 1

F2 - Acquisition Parameters  
Date\_ 20231109  
Time 16.09  
INSTRUM spect  
PROBHD 5 mm PADUL 13C  
PULPROG zgpg30  
TD 65536  
SOLVENT CDCl3  
NS 188  
DS 4  
SWH 24038.461 Hz  
FIDRES 0.366798 Hz  
AQ 1.3631488 sec  
RG 37.77  
DW 20.800 usec  
DE 6.50 usec  
TE 294.2 K  
D1 2.00000000 sec  
D11 0.03000000 sec  
TD0 1

==== CHANNEL f1 =====  
NUC1 13C  
P1 9.80 usec  
PLW1 47.40000153 W  
SFO1 100.6379178 MHz

==== CHANNEL f2 =====  
CPDPRG[2] waltz16  
NUC2 1H  
PCPD2 90.00 usec  
PLW2 23.00000000 W  
PLW12 0.30712000 W  
PLW13 0.24877000 W  
SFO2 400.1916008 MHz

F2 - Processing parameters  
SI 32768  
SF 100.6278560 MHz  
WDW EM  
SSB 0  
LB 1.00 Hz  
GB 0  
PC 1.40

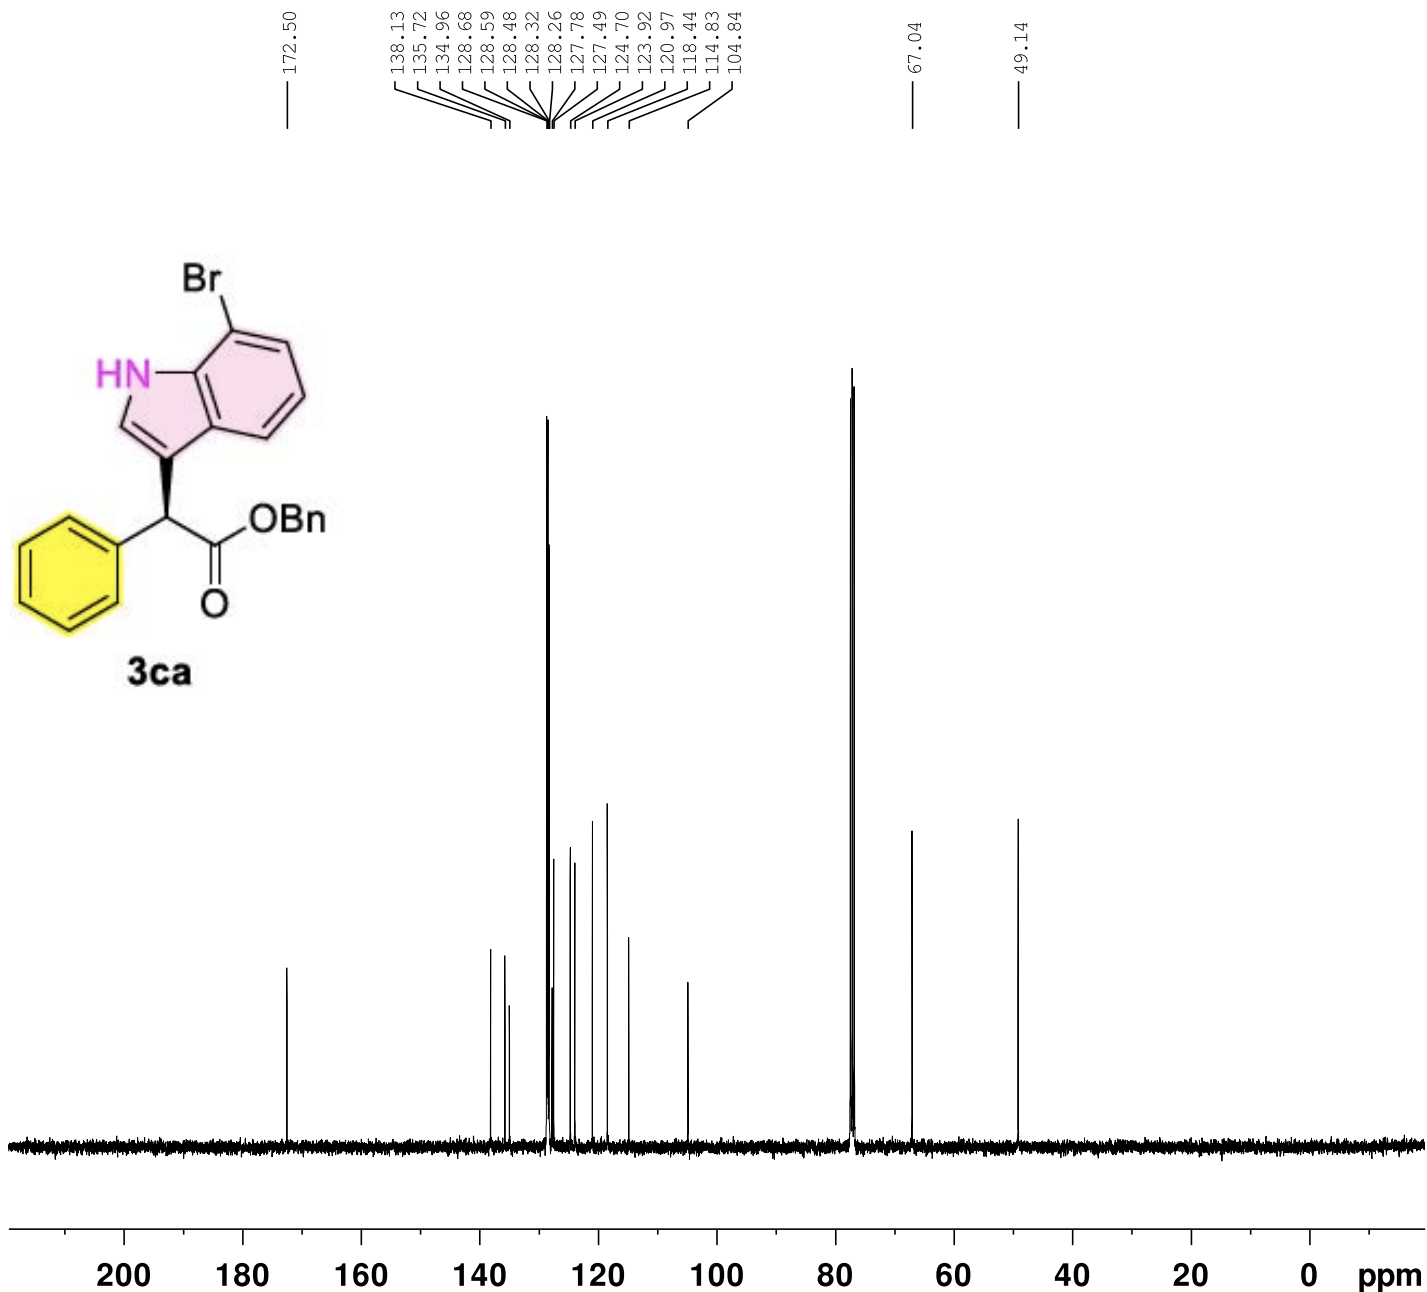



Current Data Parameters  
NAME HNMR-YX-5-p25  
EXPNO 1051  
PROCNO 1

F2 - Acquisition Parameters  
Date\_ 20230711  
Time 20.34  
INSTRUM spect  
PROBHD 5 mm PABBO BB-  
PULPROG zg30  
TD 65536  
SOLVENT CDCl3  
NS 16  
DS 2  
SWH 6009.615 Hz  
FIDRES 0.091699 Hz  
AQ 5.4525952 sec  
RG 114  
DW 83.200 usec  
DE 6.50 usec  
TE 300.1 K  
D1 1.00000000 sec  
TD0 1

==== CHANNEL f1 =====  
SFO1 300.1318534 MHz  
NUC1 1H  
P1 10.00 usec  
PLW1 14.00000000 W

F2 - Processing parameters  
SI 65536  
SF 300.1300408 MHz  
WDW EM  
SSB 0  
LB 0.30 Hz  
GB 0  
PC 1.00

8.267  
7.284  
7.257  
7.234  
7.149  
6.927  
6.899  
6.871  
6.848  
6.822

5.118

3.661

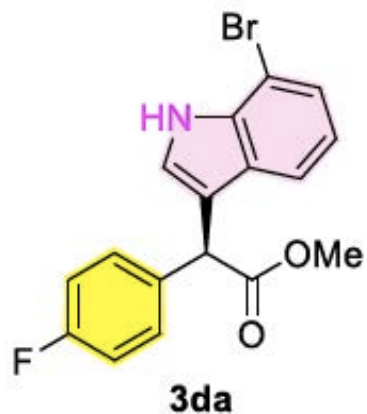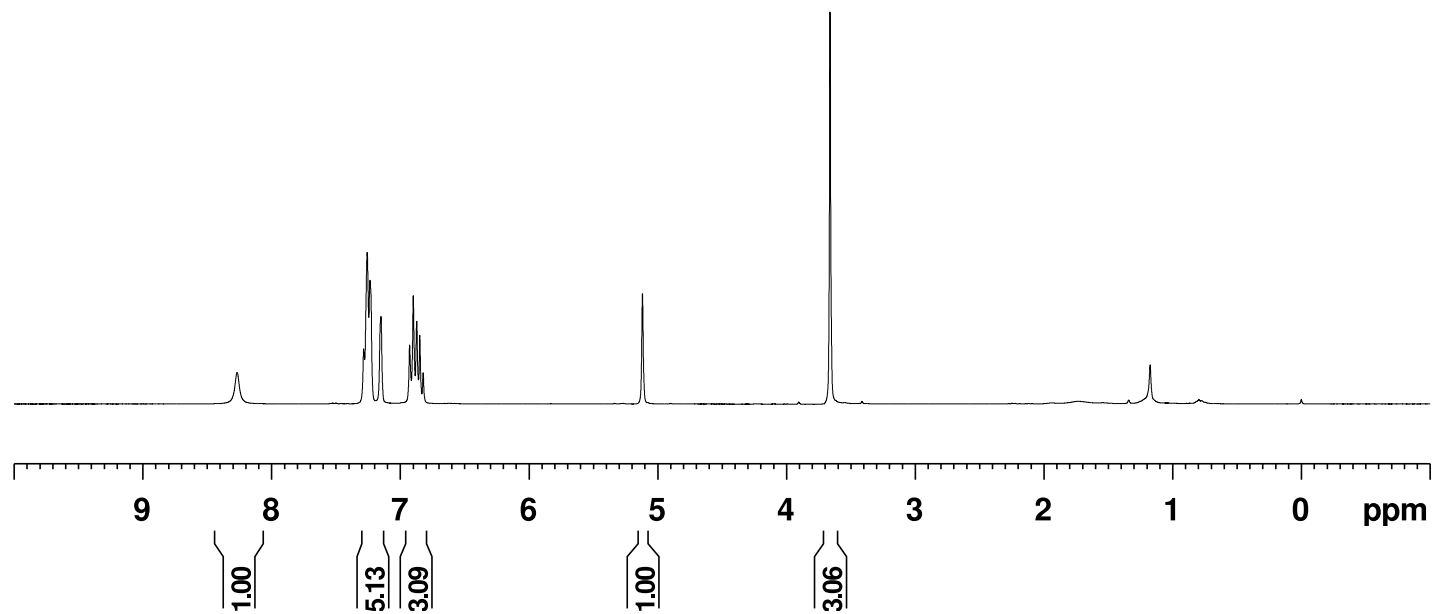



Current Data Parameters  
NAME CNMR-YX-5-p25  
EXPNO 1059  
PROCNO 1

F2 - Acquisition Parameters

Date\_ 20230712  
Time 1.26  
INSTRUM spect  
PROBHD 5 mm PABBO BB-  
PULPROG zgpg30  
TD 65536  
SOLVENT CDC13  
NS 100  
DS 4  
SWH 18028.846 Hz  
FIDRES 0.275098 Hz  
AQ 1.8175317 sec  
RG 203  
DW 27.733 usec  
DE 6.50 usec  
TE 300.7 K  
D1 2.00000000 sec  
D11 0.03000000 sec  
TD0 1

==== CHANNEL f1 =====

SFO1 75.4752949 MHz  
NUC1 13C  
P1 9.50 usec  
PLW1 34.20000076 W

==== CHANNEL f2 =====

SFO2 300.1312005 MHz  
NUC2 1H  
CPDPRG[2] waltz16  
PCPD2 90.00 usec  
PLW2 14.00000000 W  
PLW12 0.17284000 W  
PLW13 0.14000000 W

F2 - Processing parameters

SI 32768  
SF 75.4677485 MHz  
WDW EM  
SSB 0  
LB 1.00 Hz  
GB 0  
PC 1.40

173.04  
163.78  
160.52  
135.03  
133.98  
133.94  
130.05  
129.95  
127.60  
124.81  
123.82  
121.06  
118.28  
115.65  
115.36  
114.73  
104.92  
52.49  
48.21

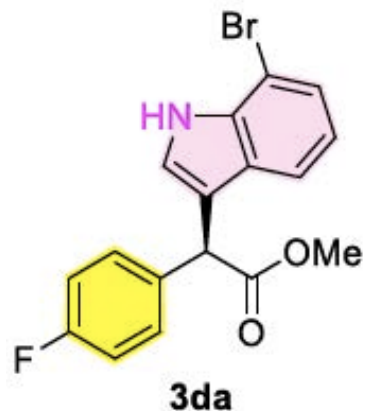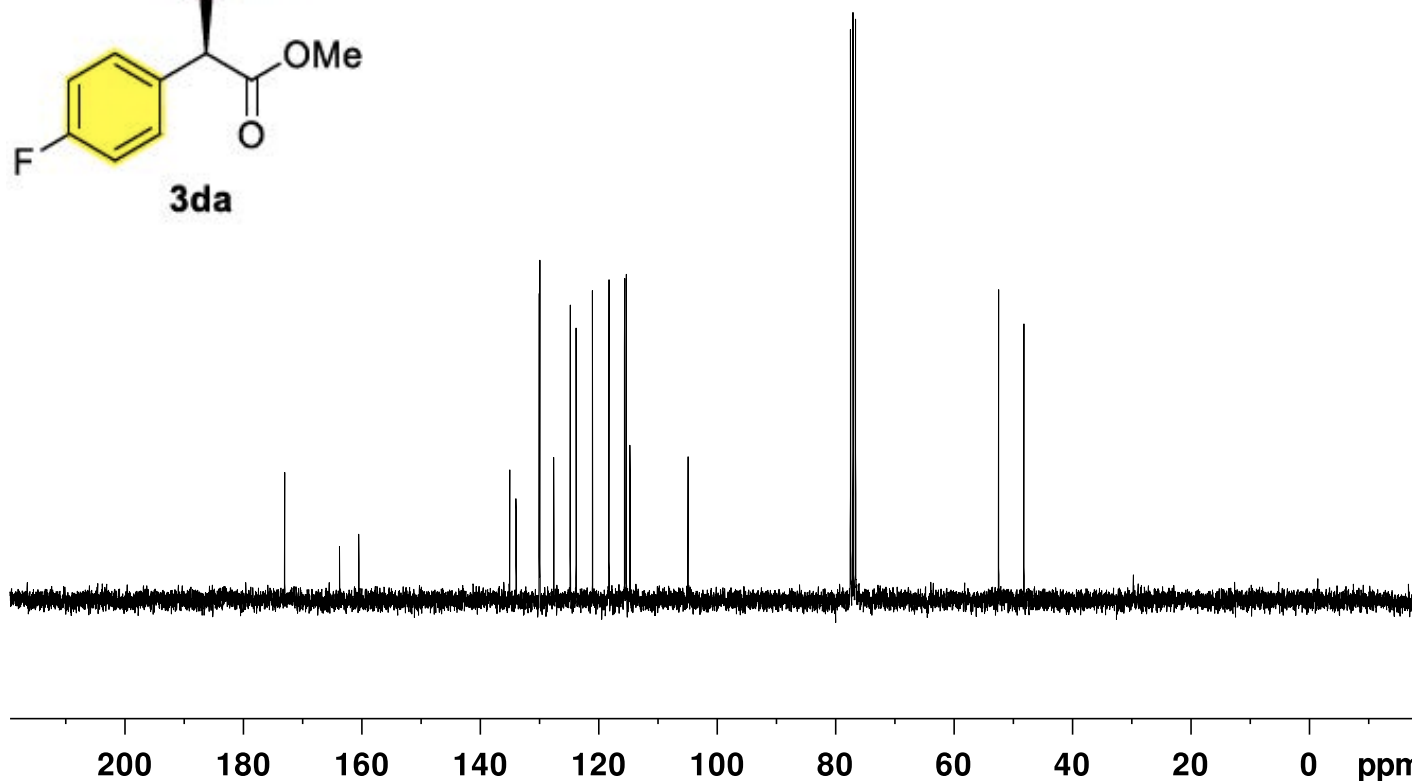





Current Data Parameters  
NAME FNMR-YX-5-p25  
EXPNO 1052  
PROCNO 1

F2 - Acquisition Parameters  
Date\_ 20230711  
Time 20.38  
INSTRUM spect  
PROBHD 5 mm PABBO BB-  
PULPROG zgfhigqn.2  
TD 131072  
SOLVENT CDCl3  
NS 16  
DS 4  
SWH 66964.289 Hz  
FIDRES 0.510897 Hz  
AQ 0.9786710 sec  
RG 203  
DW 7.467 usec  
DE 6.50 usec  
TE 300.2 K  
D1 1.00000000 sec  
D11 0.03000000 sec  
D12 0.00002000 sec  
TD0 1

==== CHANNEL f1 =====  
SFO1 282.3761148 MHz  
NUC1 19F  
P1 14.50 usec  
PLW1 10.39999962 W

==== CHANNEL f2 =====  
SFO2 300.1312005 MHz  
NUC2 1H  
CPDPRG[2] waltz16  
PCPD2 90.00 usec  
PLW2 14.00000000 W  
PLW12 0.17284000 W

F2 - Processing parameters  
SI 65536  
SF 282.4043552 MHz  
WDW EM  
SSB 0  
LB 0.30 Hz  
GB 0  
PC 1.00

-115.14

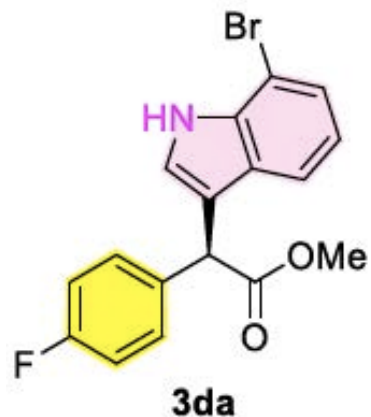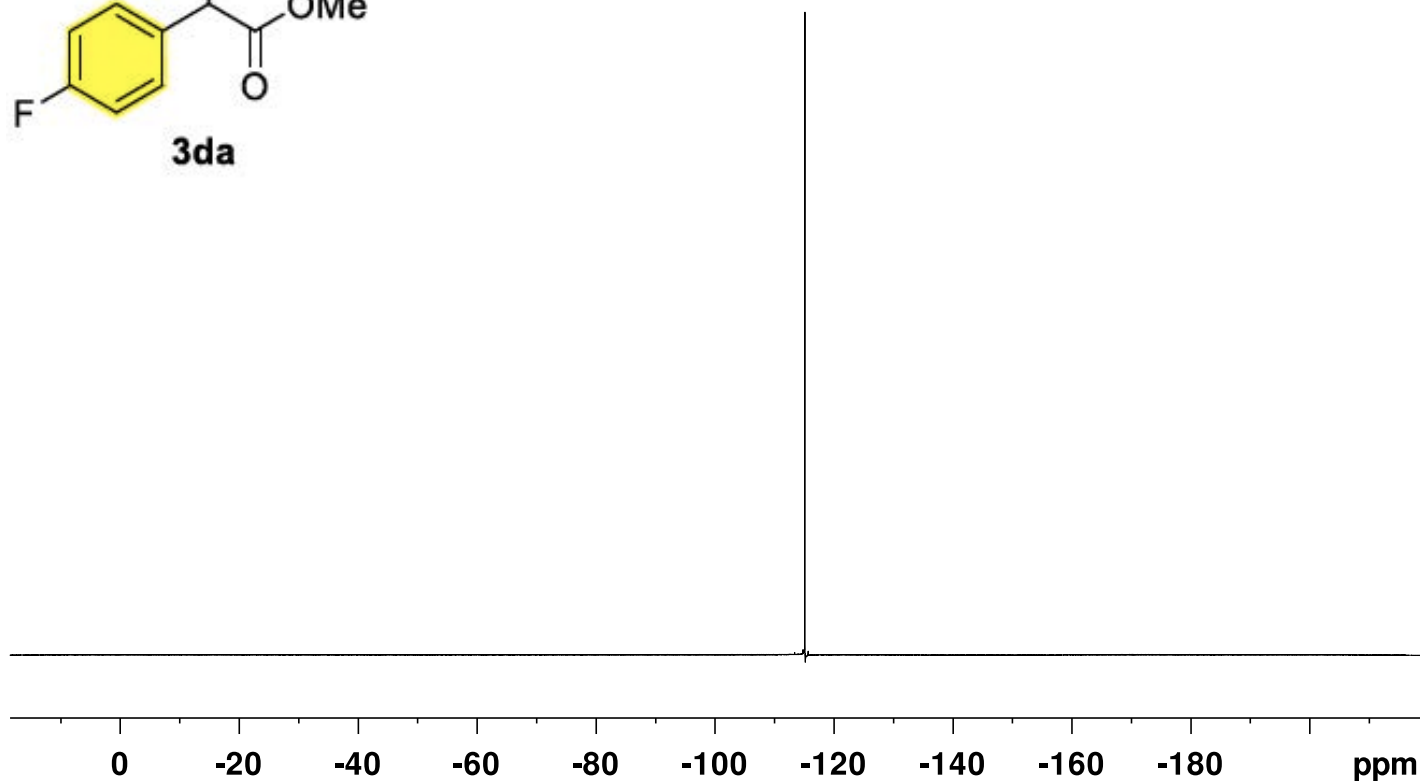



Current Data Parameters  
NAME HNMR-YX-4-p98  
EXPNO 757  
PROCNO 1

F2 - Acquisition Parameters  
Date\_ 20230619  
Time 22.11  
INSTRUM spect  
PROBHD 5 mm PABBO BB-  
PULPROG zg30  
TD 65536  
SOLVENT CDCl3  
NS 16  
DS 2  
SWH 6009.615 Hz  
FIDRES 0.091699 Hz  
AQ 5.4525952 sec  
RG 144  
DW 83.200 usec  
DE 6.50 usec  
TE 296.7 K  
D1 1.00000000 sec  
TD0 1

==== CHANNEL f1 =====  
SFO1 300.1318534 MHz  
NUC1 1H  
P1 10.00 usec  
PLW1 14.00000000 W

F2 - Processing parameters  
SI 65536  
SF 300.1300381 MHz  
WDW EM  
SSB 0  
LB 0.30 Hz  
GB 0  
PC 1.00

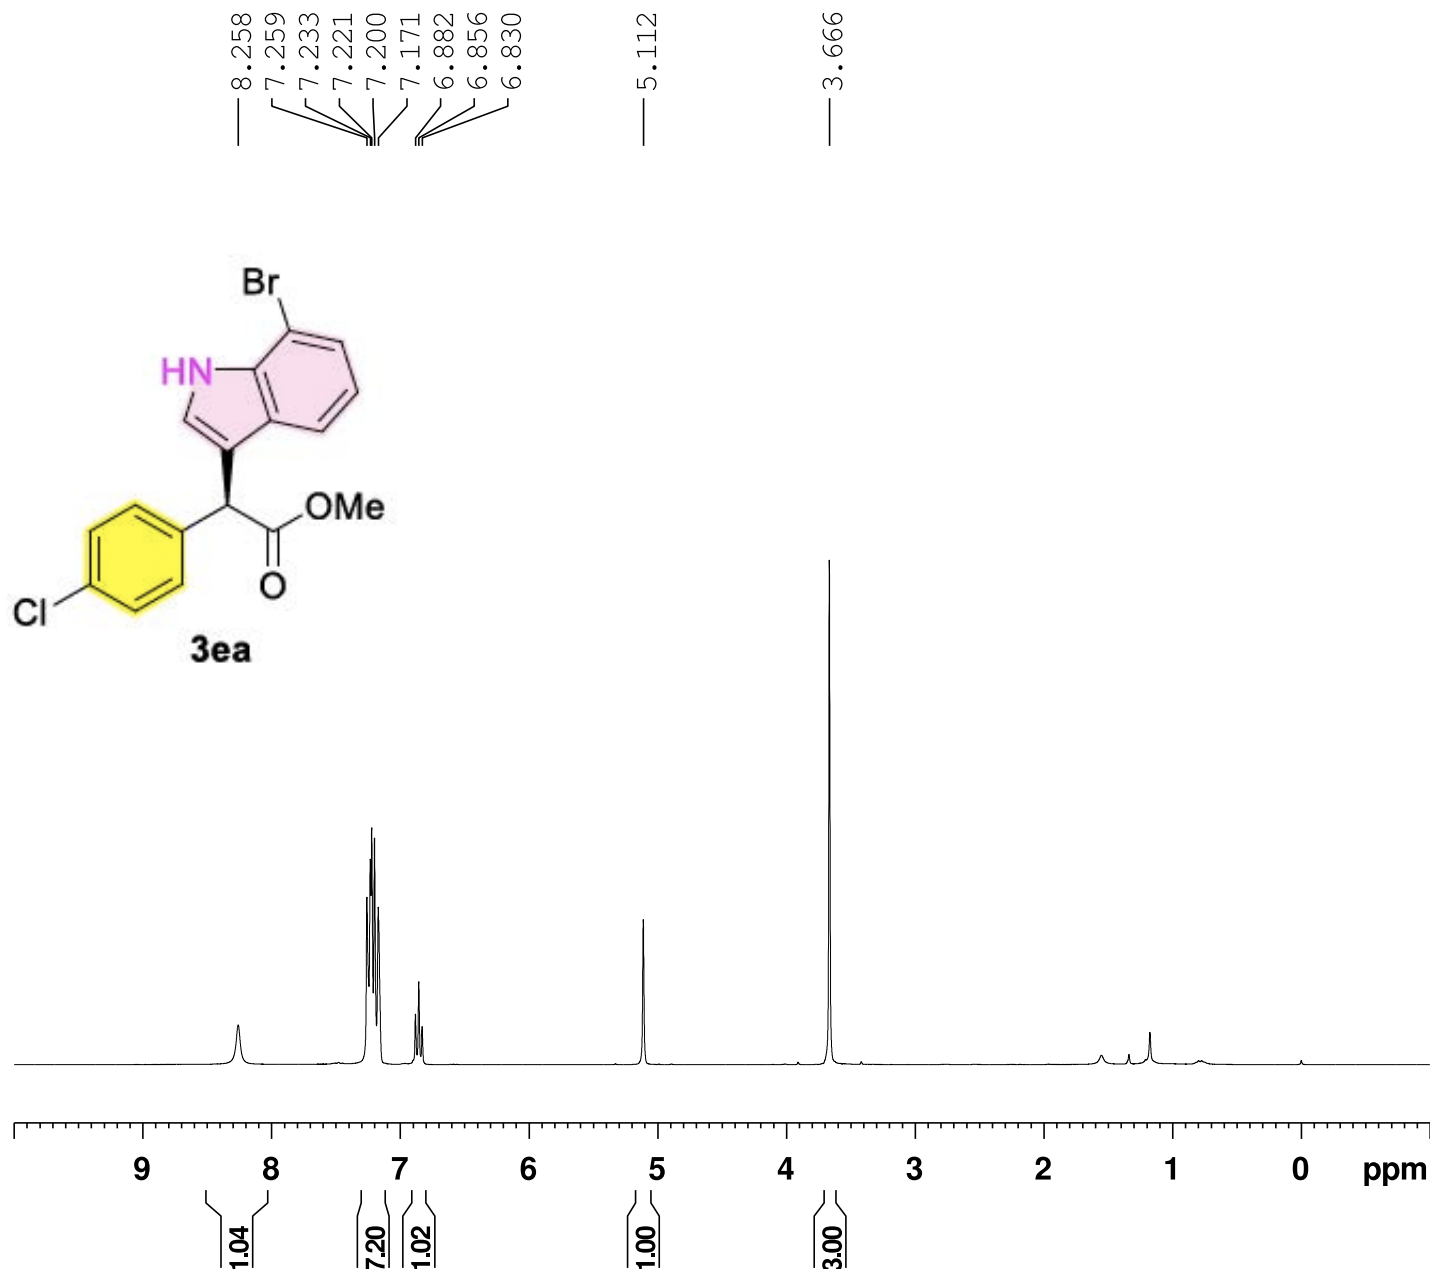



Current Data Parameters  
NAME CNMR-YX-4-p98  
EXPNO 758  
PROCNO 1

F2 - Acquisition Parameters

Date\_ 20230619  
Time 22.29  
INSTRUM spect  
PROBHD 5 mm PABBO BB-  
PULPROG zgpg30  
TD 65536  
SOLVENT CDC13  
NS 250  
DS 4  
SWH 18028.846 Hz  
FIDRES 0.275098 Hz  
AQ 1.8175317 sec  
RG 203  
DW 27.733 usec  
DE 6.50 usec  
TE 297.3 K  
D1 2.00000000 sec  
D11 0.03000000 sec  
TD0 1

==== CHANNEL f1 =====  
SFO1 75.4752949 MHz  
NUC1 13C  
P1 9.50 usec  
PLW1 34.20000076 W

==== CHANNEL f2 =====  
SFO2 300.1312005 MHz  
NUC2 1H  
CPDPRG[2] waltz16  
PCPD2 90.00 usec  
PLW2 14.00000000 W  
PLW12 0.17284000 W  
PLW13 0.14000000 W

F2 - Processing parameters  
SI 32768  
SF 75.4677485 MHz  
WDW EM  
SSB 0  
LB 1.00 Hz  
GB 0  
PC 1.40

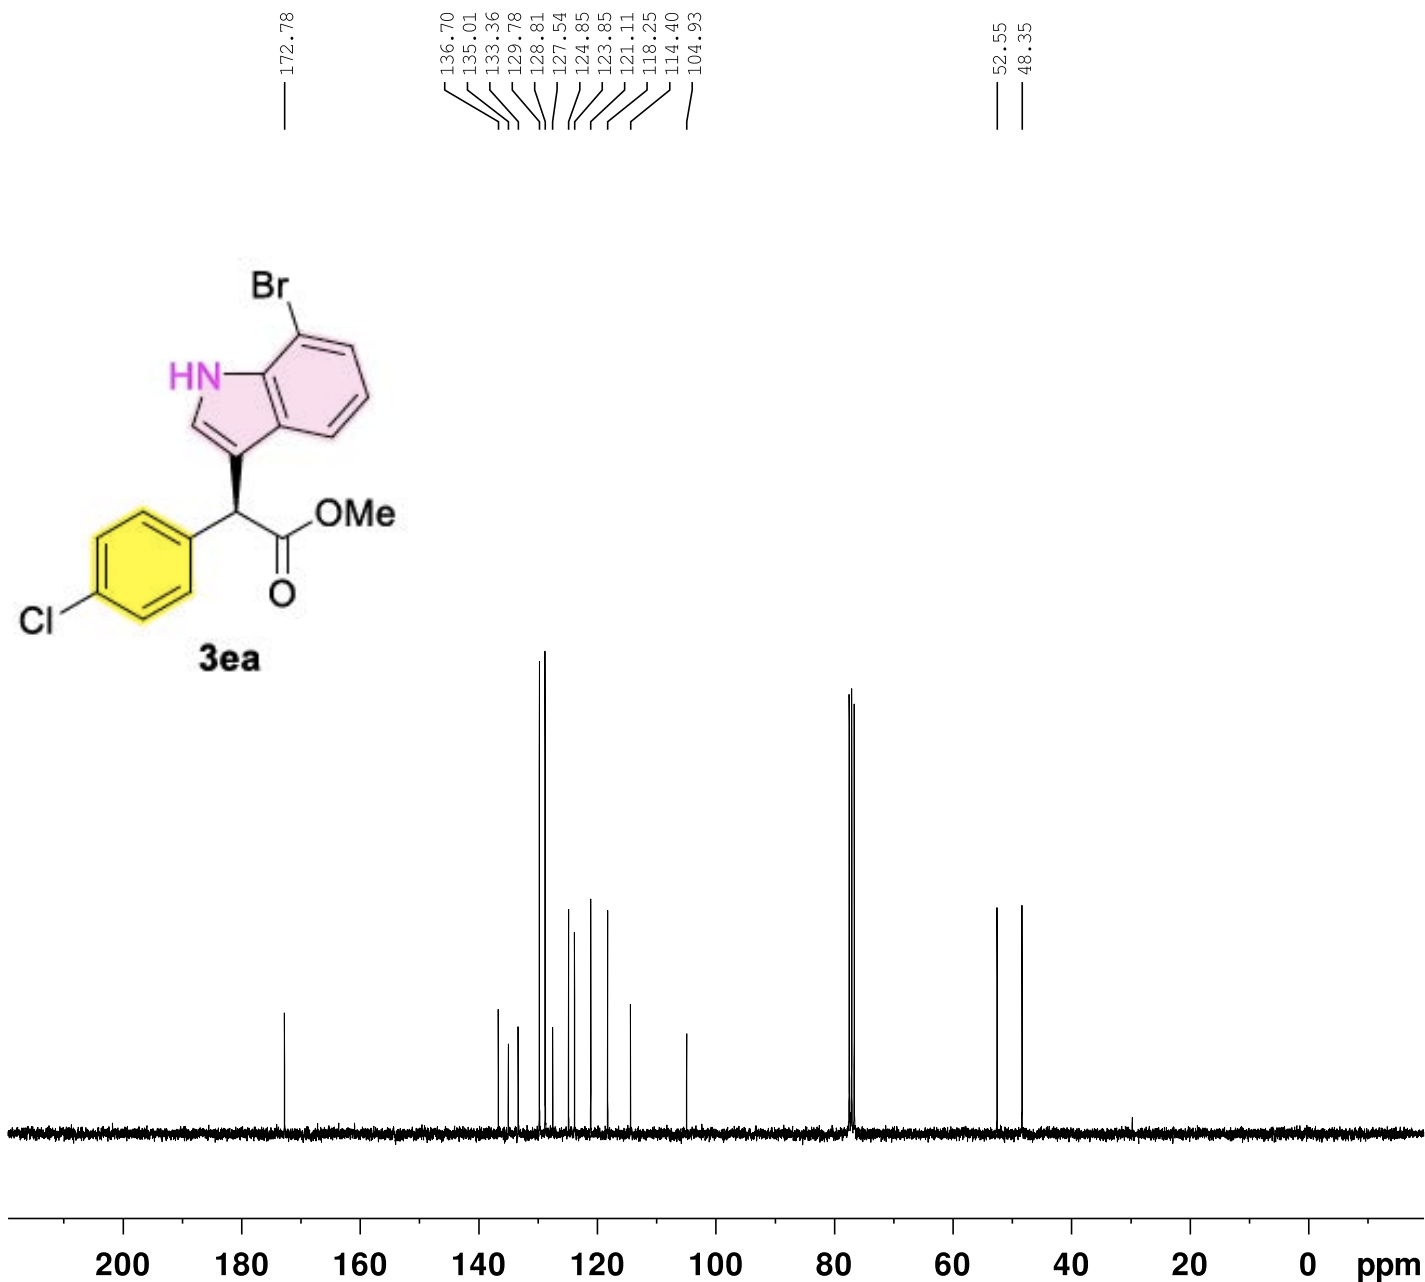

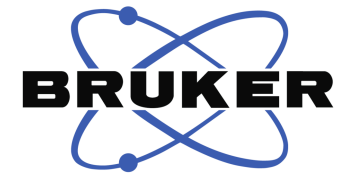

Current Data Parameters  
NAME HNMR-YX-4-p95  
EXPNO 722  
PROCNO 1

F2 - Acquisition Parameters  
Date\_ 20230616  
Time 14.41  
INSTRUM spect  
PROBHD 5 mm PABBO BB-  
PULPROG zg30  
TD 65536  
SOLVENT CDCl3  
NS 16  
DS 2  
SWH 6009.615 Hz  
FIDRES 0.091699 Hz  
AQ 5.4525952 sec  
RG 114  
DW 83.200 usec  
DE 6.50 usec  
TE 296.7 K  
D1 1.00000000 sec  
TD0 1

==== CHANNEL f1 =====  
SFO1 300.1318534 MHz  
NUC1 1H  
P1 10.00 usec  
PLW1 14.00000000 W

F2 - Processing parameters  
SI 65536  
SF 300.1300417 MHz  
WDW EM  
SSB 0  
LB 0.30 Hz  
GB 0  
PC 1.00

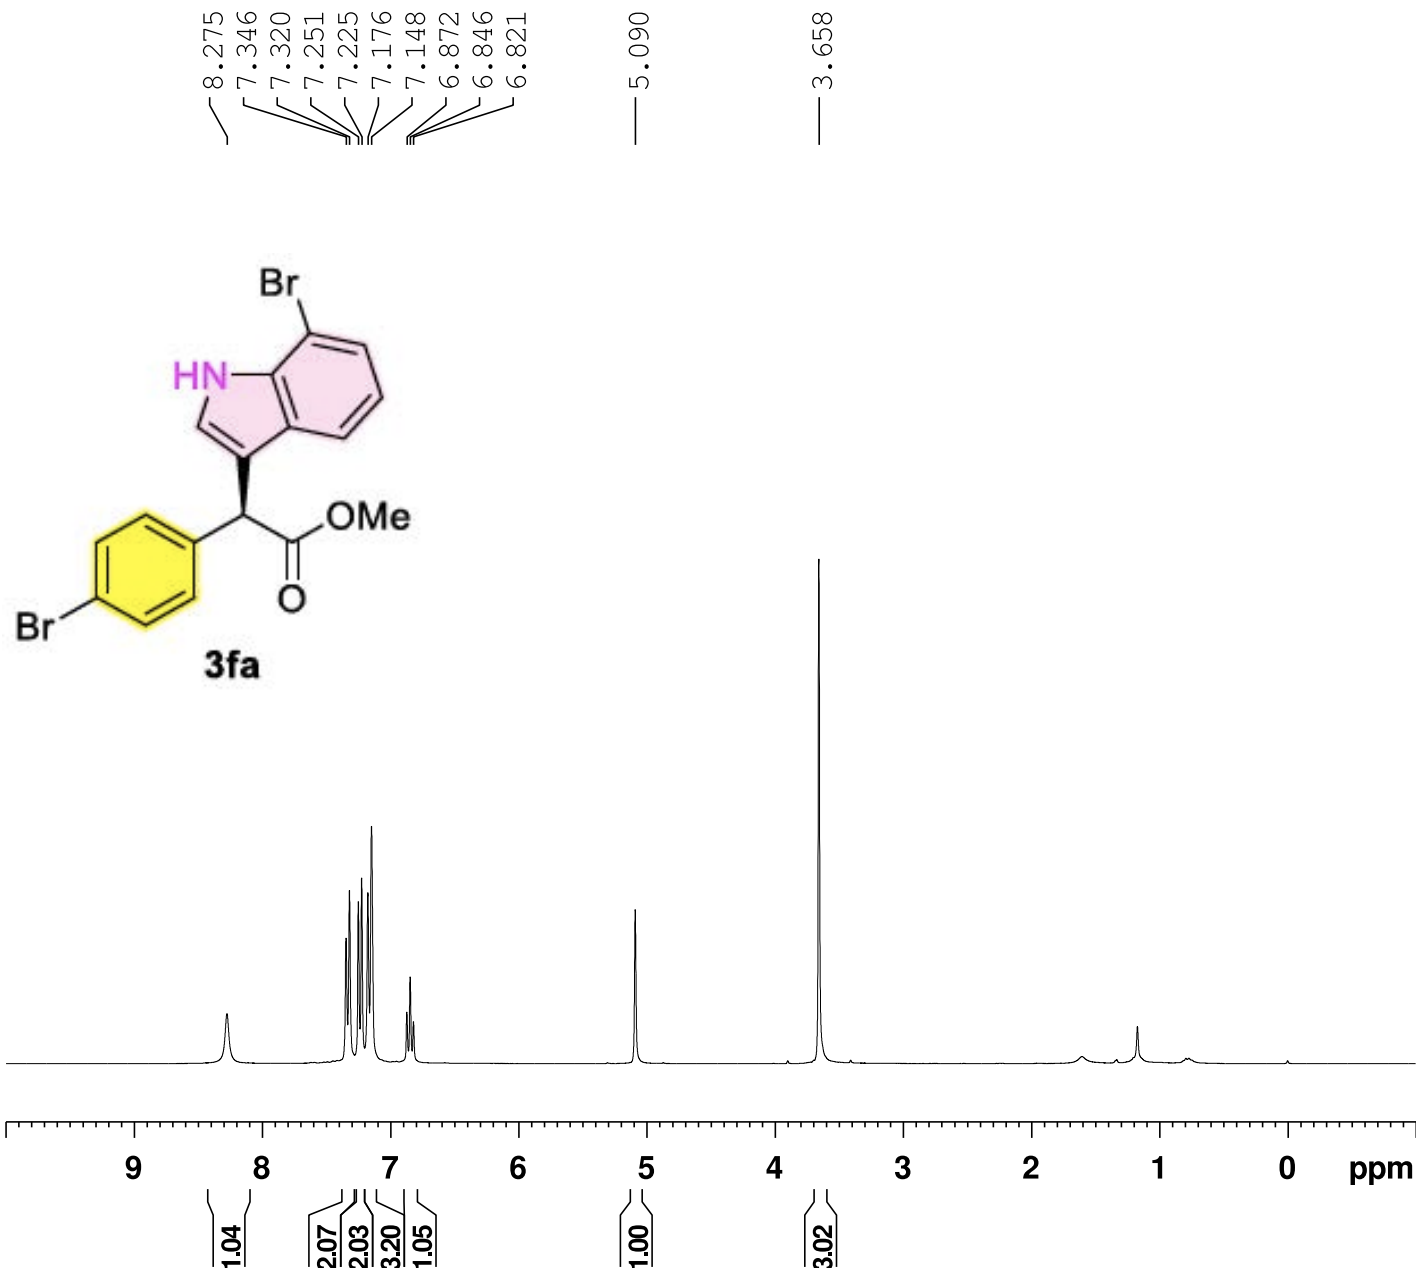



Current Data Parameters  
NAME CNMR-YX-4-p95  
EXPNO 730  
PROCNO 1

F2 - Acquisition Parameters

Date\_ 20230616  
Time 16.11  
INSTRUM spect  
PROBHD 5 mm PABBO BB-  
PULPROG zgpg30  
TD 65536  
SOLVENT CDCl3  
NS 200  
DS 4  
SWH 18028.846 Hz  
FIDRES 0.275098 Hz  
AQ 1.8175317 sec  
RG 203  
DW 27.733 usec  
DE 6.50 usec  
TE 296.9 K  
D1 2.00000000 sec  
D11 0.03000000 sec  
TD0 1

==== CHANNEL f1 =====  
SFO1 75.4752949 MHz  
NUC1 13C  
P1 9.50 usec  
PLW1 34.20000076 W

==== CHANNEL f2 =====  
SFO2 300.1312005 MHz  
NUC2 1H  
CPDPRG[2] waltz16  
PCPD2 90.00 usec  
PLW2 14.00000000 W  
PLW12 0.17284000 W  
PLW13 0.14000000 W

F2 - Processing parameters

SI 32768  
SF 75.4677485 MHz  
WDW EM  
SSB 0  
LB 1.00 Hz  
GB 0  
PC 1.40

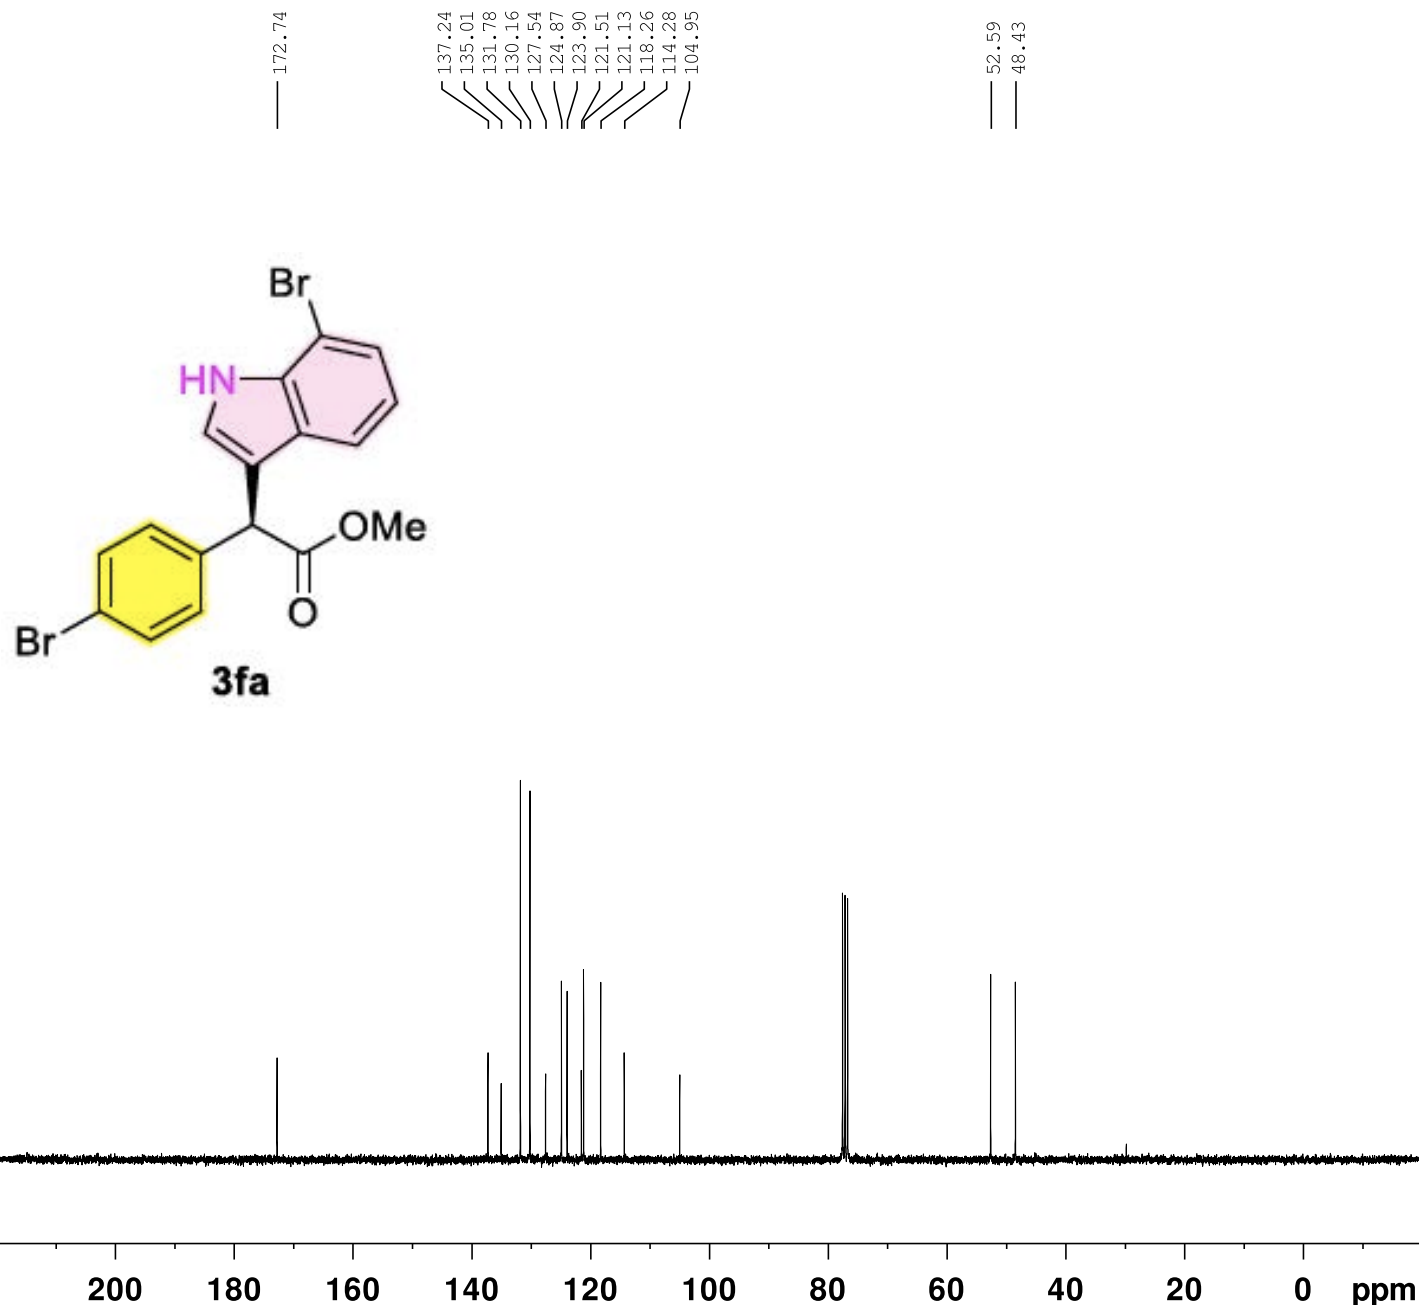



Current Data Parameters  
NAME HNMR-YX-5-p50  
EXPNO 1  
PROCNO 1

F2 - Acquisition Parameters  
Date\_ 20230728  
Time 20.14 h  
INSTRUM Avance  
PROBHD z116098\_0833 (  
PULPROG zg30  
TD 65536  
SOLVENT CDCl3  
NS 16  
DS 2  
SWH 8196.722 Hz  
FIDRES 0.250144 Hz  
AQ 3.9976959 sec  
RG 93.006  
DW 61.000 usec  
DE 13.54 usec  
TE 294.7 K  
D1 1.00000000 sec  
TD0 1  
SFO1 400.1324708 MHz  
NUC1 1H  
P0 3.33 usec  
P1 10.00 usec  
PLW1 20.73200035 W

F2 - Processing parameters  
SI 65536  
SF 400.1300518 MHz  
WDW EM  
SSB 0  
LB 0.30 Hz  
GB 0  
PC 1.00

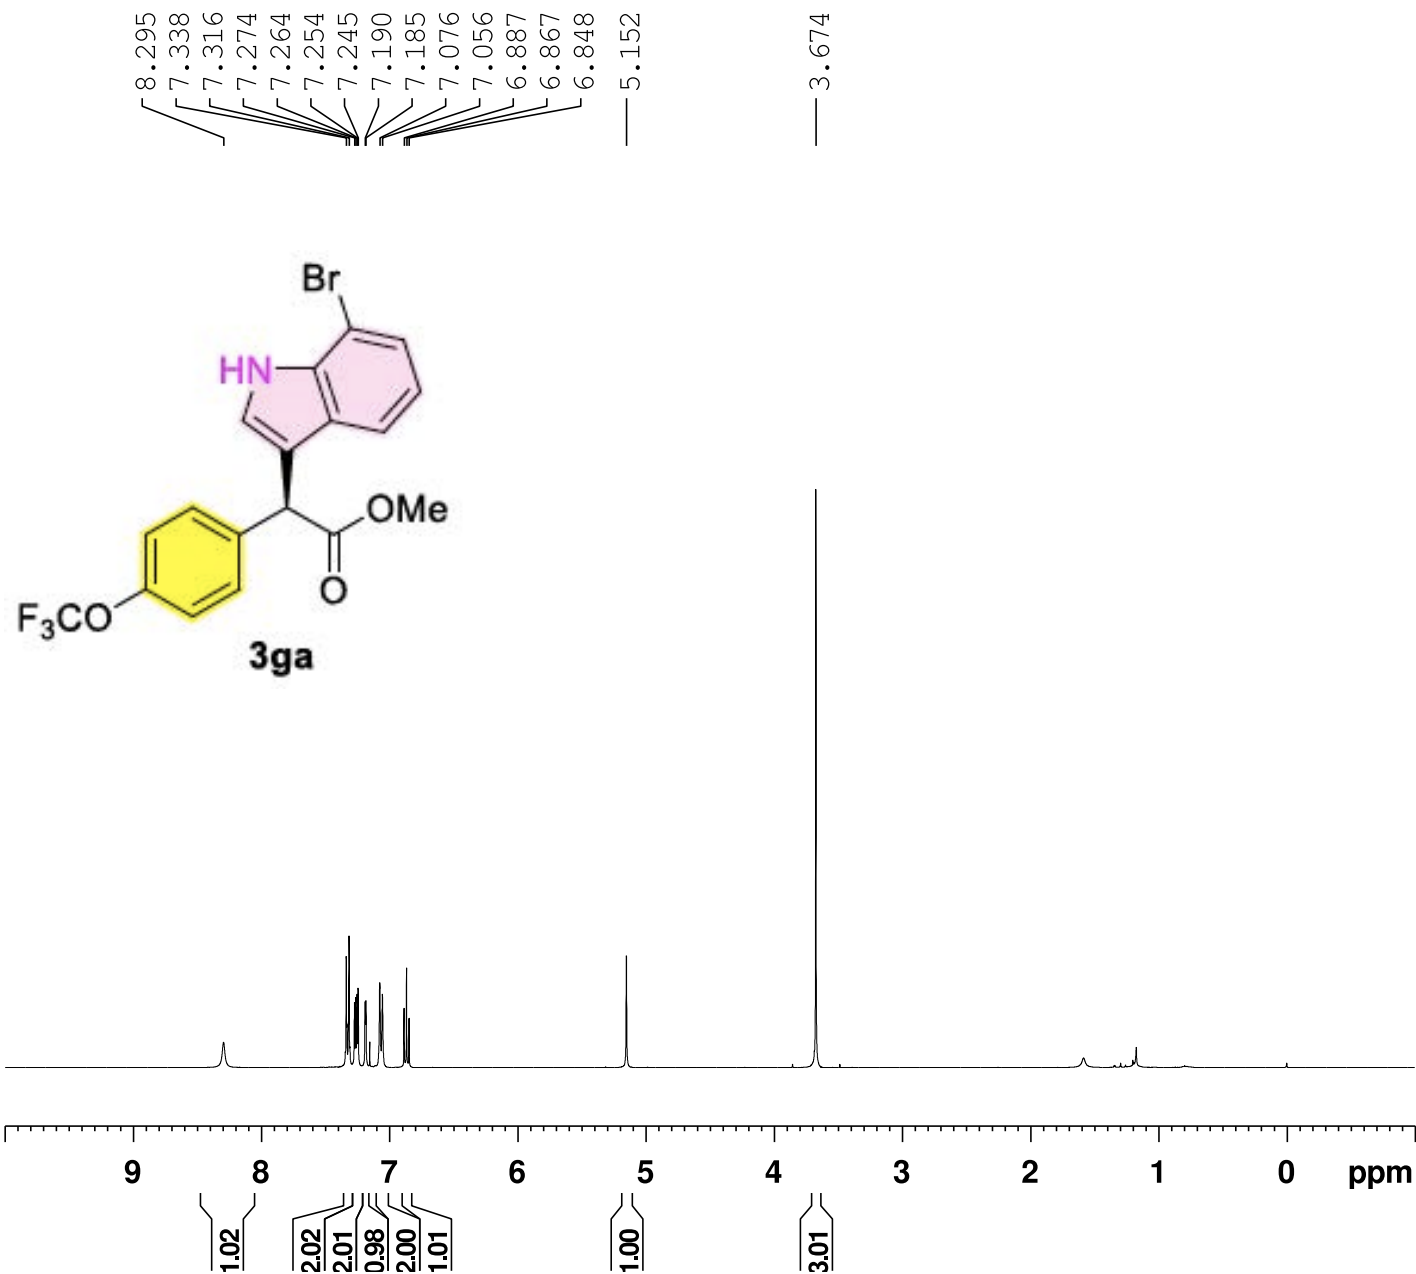



Current Data Parameters  
NAME CNMR-YX-5-p50  
EXPNO 2  
PROCNO 1

F2 - Acquisition Parameters

Date\_ 20230729  
Time 6.41 h  
INSTRUM Avance  
PROBHD Z116098\_0833 (  
PULPROG zgpg30  
TD 65536  
SOLVENT CDC13  
NS 200  
DS 4  
SWH 23809.523 Hz  
FIDRES 0.726609 Hz  
AQ 1.3762560 sec  
RG 46.0295  
DW 21.000 usec  
DE 6.50 usec  
TE 294.7 K  
D1 2.00000000 sec  
D11 0.03000000 sec  
TD0 1  
SFO1 100.6228298 MHz  
NUC1 13C  
P0 3.33 usec  
P1 10.00 usec  
PLW1 87.89900208 W  
SFO2 400.1316005 MHz  
NUC2 1H  
CPDPRG[2] waltz65  
PCPD2 90.00 usec  
PLW2 20.73200035 W  
PLW12 0.25595000 W  
PLW13 0.12874000 W

F2 - Processing parameters

SI 32768  
SF 100.6127685 MHz  
WDW EM  
SSB 0  
LB 1.00 Hz  
GB 0  
PC 1.40

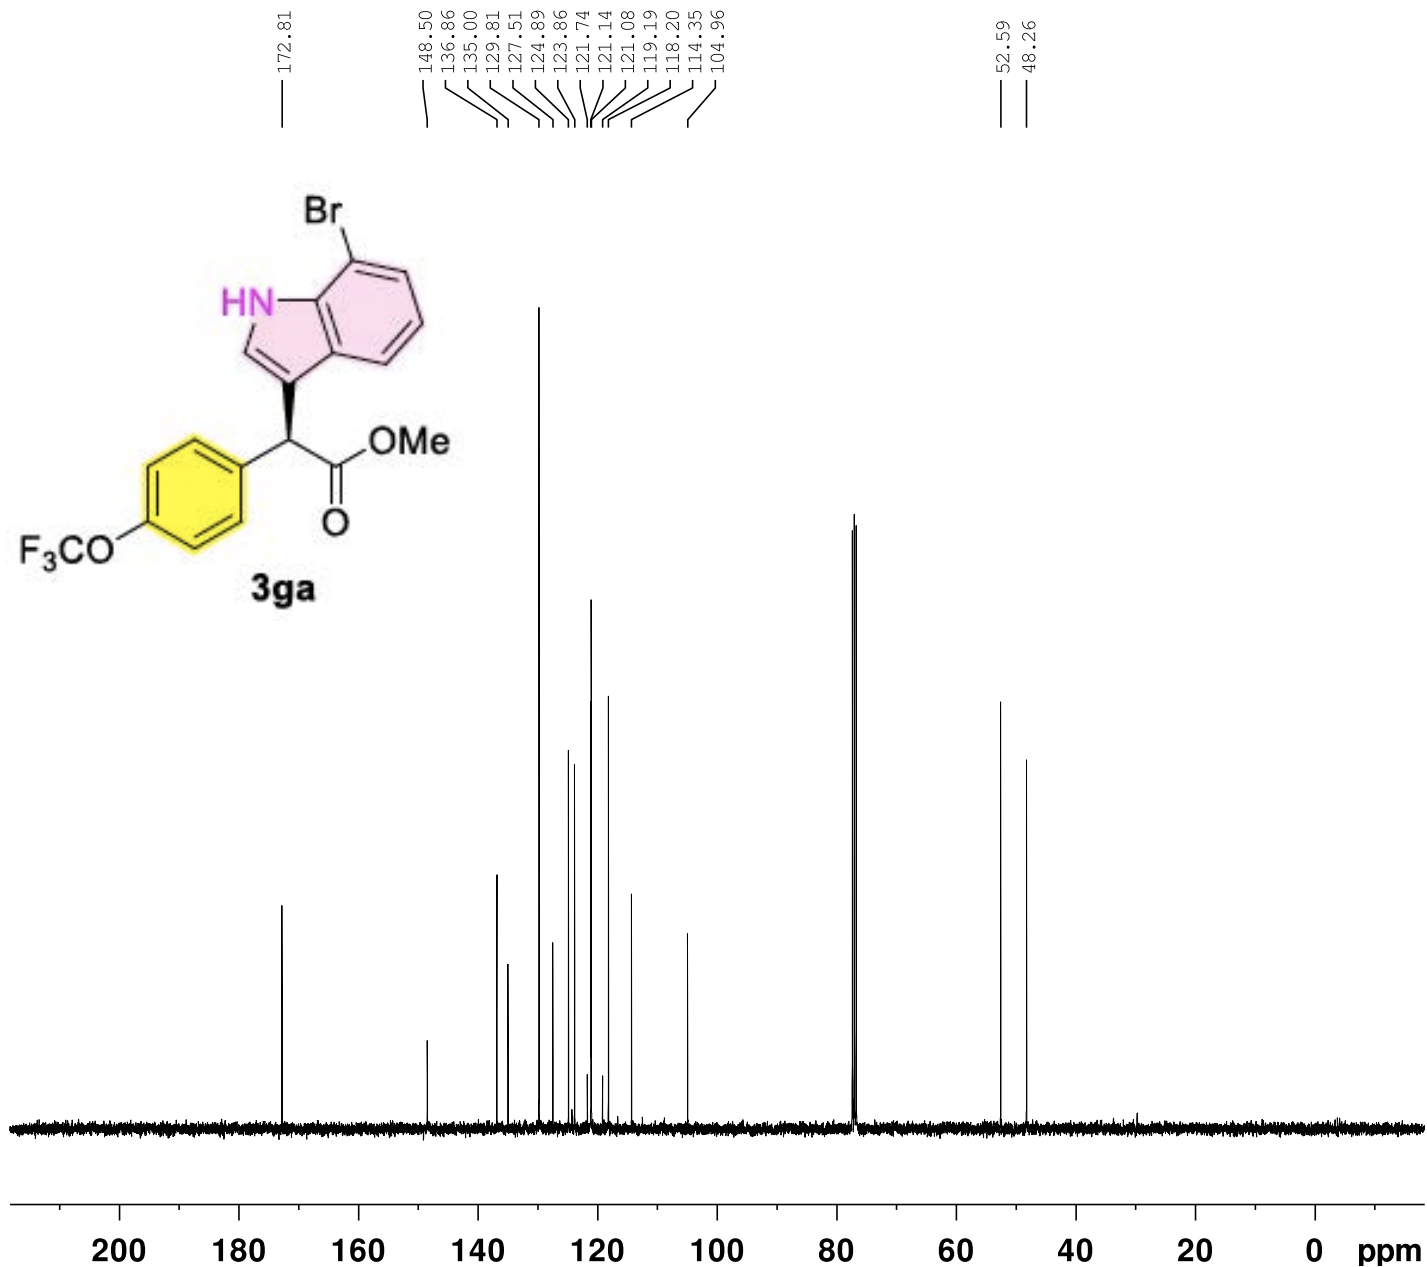

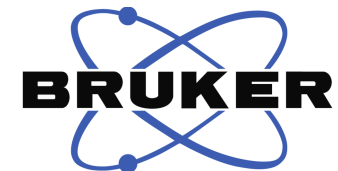

Current Data Parameters  
NAME FNMR-YX-5-p50  
EXPNO 3  
PROCNO 1

F2 - Acquisition Parameters

Date\_ 20230729  
Time 7.01 h  
INSTRUM Avance  
PROBHD Z116098\_0833 (  
PULPROG zgig  
TD 131072  
SOLVENT CDCl3  
NS 16  
DS 4  
SWH 90909.094 Hz  
FIDRES 1.387163 Hz  
AQ 0.7208960 sec  
RG 101  
DW 5.500 usec  
DE 6.50 usec  
TE 294.7 K  
D1 1.00000000 sec  
D11 0.03000000 sec  
TD0 1  
SFO1 376.4607164 MHz  
NUC1 19F  
P1 18.00 usec  
PLW1 16.73100090 W  
SFO2 400.1316005 MHz  
NUC2 1H  
CPDPRG[2] waltz16  
PCPD2 90.00 usec  
PLW2 20.73200035 W  
PLW12 0.25595000 W

F2 - Processing parameters

SI 65536  
SF 376.4983662 MHz  
WDW EM  
SSB 0  
LB 0.30 Hz  
GB 0  
PC 1.00

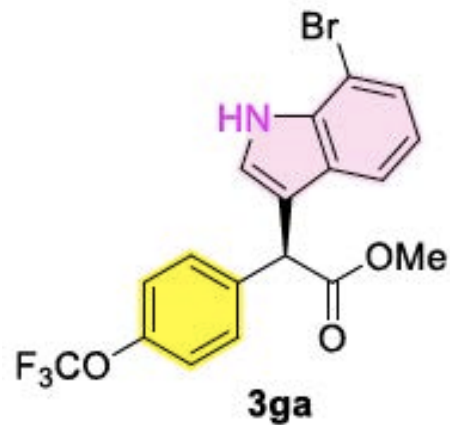

-57.80

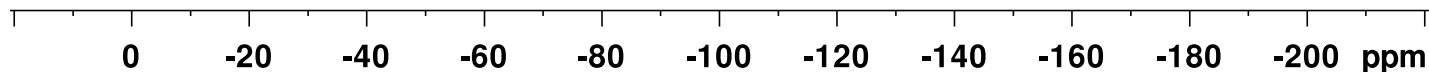





Current Data Parameters  
NAME HNMR-YX-4-p93  
EXPNO 532  
PROCNO 1

F2 - Acquisition Parameters  
Date\_ 20230612  
Time 15.59  
INSTRUM spect  
PROBHD 5 mm PABBO BB-  
PULPROG zg30  
TD 65536  
SOLVENT CDCl3  
NS 16  
DS 2  
SWH 6009.615 Hz  
FIDRES 0.091699 Hz  
AQ 5.4525952 sec  
RG 144  
DW 83.200 usec  
DE 6.50 usec  
TE 296.5 K  
D1 1.00000000 sec  
TD0 1

==== CHANNEL f1 =====  
SFO1 300.1318534 MHz  
NUC1 1H  
P1 10.00 usec  
PLW1 14.00000000 W

F2 - Processing parameters  
SI 65536  
SF 300.1300359 MHz  
WDW EM  
SSB 0  
LB 0.30 Hz  
GB 0  
PC 1.00

8.285  
7.499  
7.472  
7.436  
7.408  
7.273  
7.247  
7.215  
6.897  
6.871  
6.845

5.205

3.683

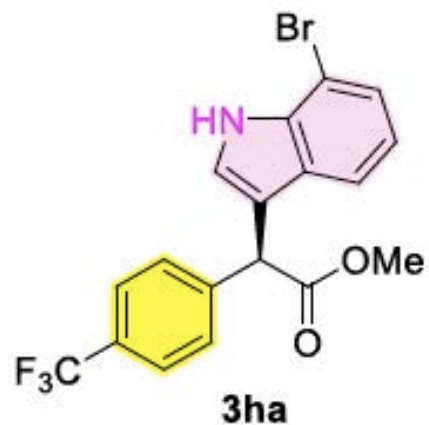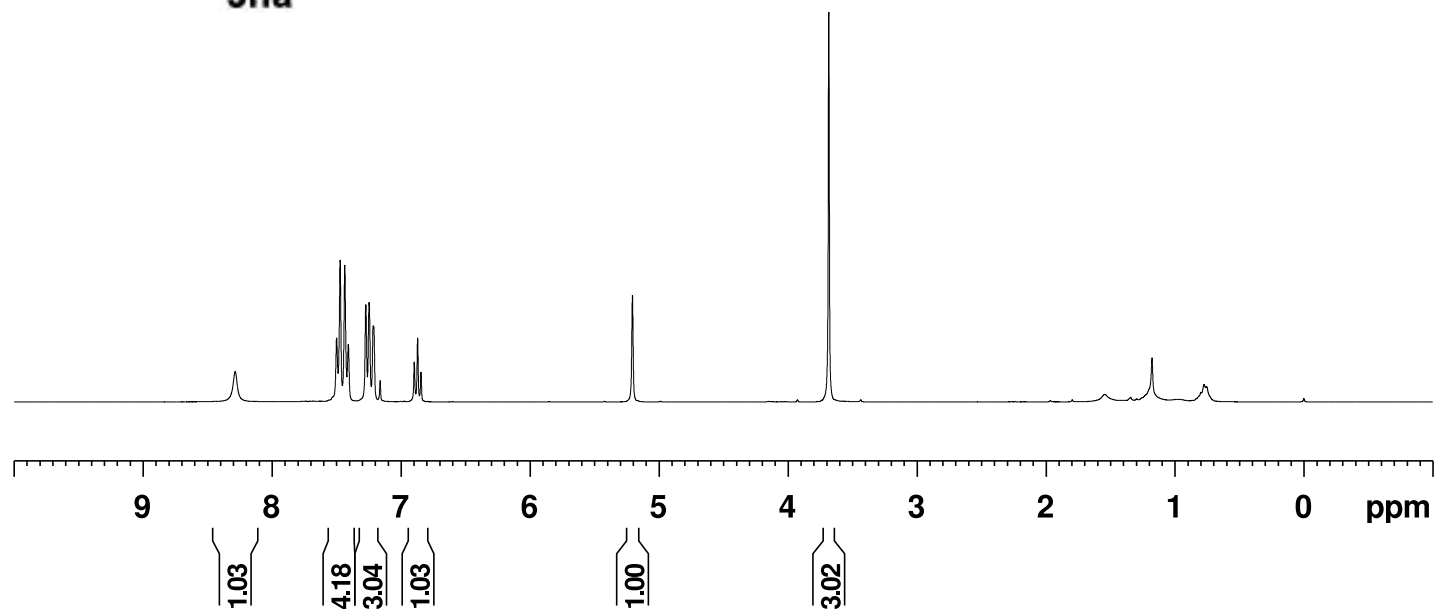



Current Data Parameters  
NAME CNMR-YX-4-p93  
EXPNO 609  
PROCNO 1

F2 - Acquisition Parameters  
Date\_ 20230614  
Time 15.57  
INSTRUM spect  
PROBHD 5 mm PABBO BB-  
PULPROG zgpg30  
TD 65536  
SOLVENT CDCl3  
NS 81  
DS 4  
SWH 18028.846 Hz  
FIDRES 0.275098 Hz  
AQ 1.8175317 sec  
RG 203  
DW 27.733 usec  
DE 6.50 usec  
TE 297.5 K  
D1 2.00000000 sec  
D11 0.03000000 sec  
TD0 1

==== CHANNEL f1 =====  
SFO1 75.4752949 MHz  
NUC1 13C  
P1 9.50 usec  
PLW1 34.20000076 W

==== CHANNEL f2 =====  
SFO2 300.1312005 MHz  
NUC2 1H  
CPDPRG[2] waltz16  
PCPD2 90.00 usec  
PLW2 14.00000000 W  
PLW12 0.17284000 W  
PLW13 0.14000000 W

F2 - Processing parameters  
SI 32768  
SF 75.4677485 MHz  
WDW EM  
SSB 0  
LB 1.00 Hz  
GB 0  
PC 1.40

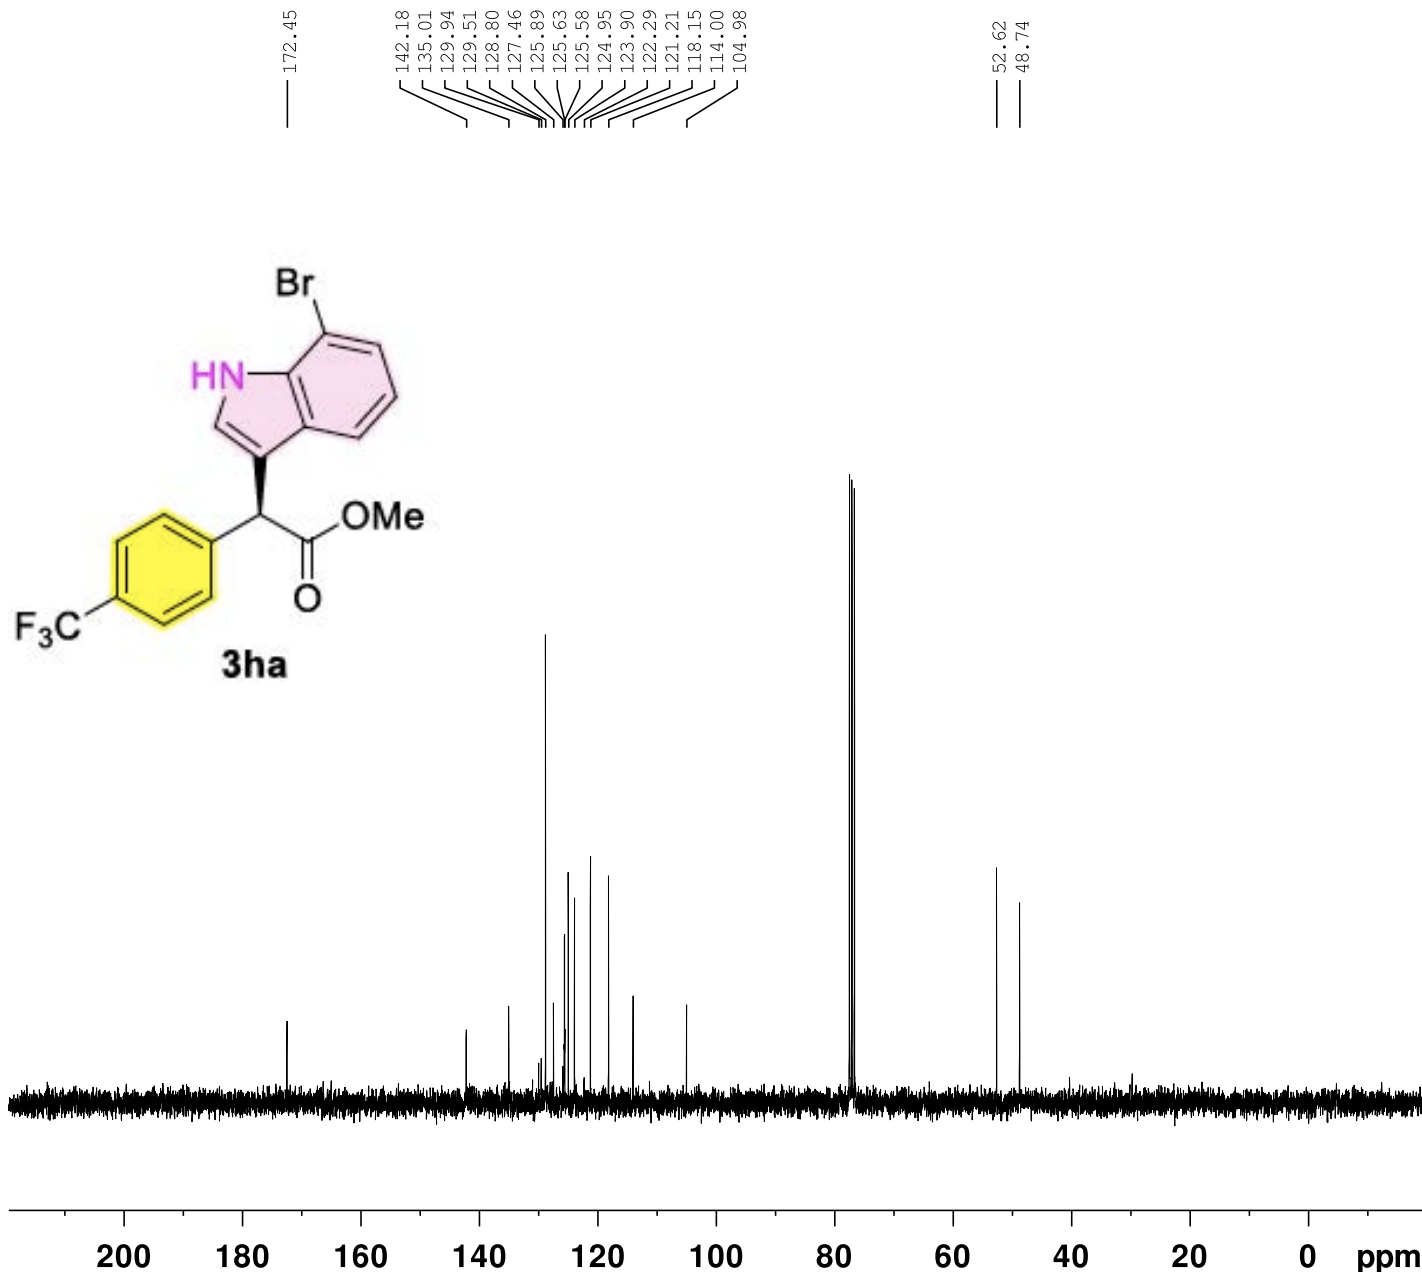



Current Data Parameters  
NAME FNMN-YX-4-p93  
EXPNO 608  
PROCNO 1

F2 - Acquisition Parameters  
Date\_ 20230614  
Time 15.50  
INSTRUM spect  
PROBHD 5 mm PABBO BB-  
PULPROG zgfhigqn.2  
TD 131072  
SOLVENT CDCl3  
NS 16  
DS 4  
SWH 66964.289 Hz  
FIDRES 0.510897 Hz  
AQ 0.9786710 sec  
RG 203  
DW 7.467 usec  
DE 6.50 usec  
TE 297.1 K  
D1 1.00000000 sec  
D11 0.03000000 sec  
D12 0.00002000 sec  
TD0 1

==== CHANNEL f1 =====  
SFO1 282.3761148 MHz  
NUC1 19F  
P1 14.50 usec  
PLW1 10.39999962 W

==== CHANNEL f2 =====  
SFO2 300.1312005 MHz  
NUC2 1H  
CPDPRG[2] waltz16  
PCPD2 90.00 usec  
PLW2 14.00000000 W  
PLW12 0.17284000 W

F2 - Processing parameters  
SI 65536  
SF 282.4043552 MHz  
WDW EM  
SSB 0  
LB 0.30 Hz  
GB 0  
PC 1.00

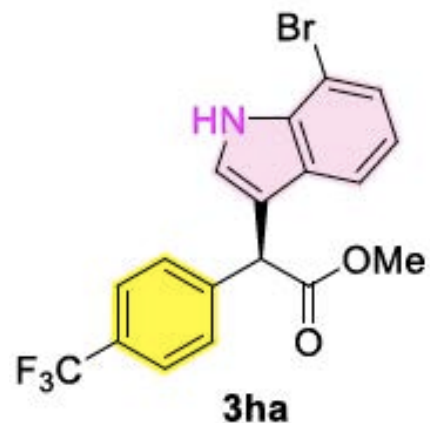

-62.51

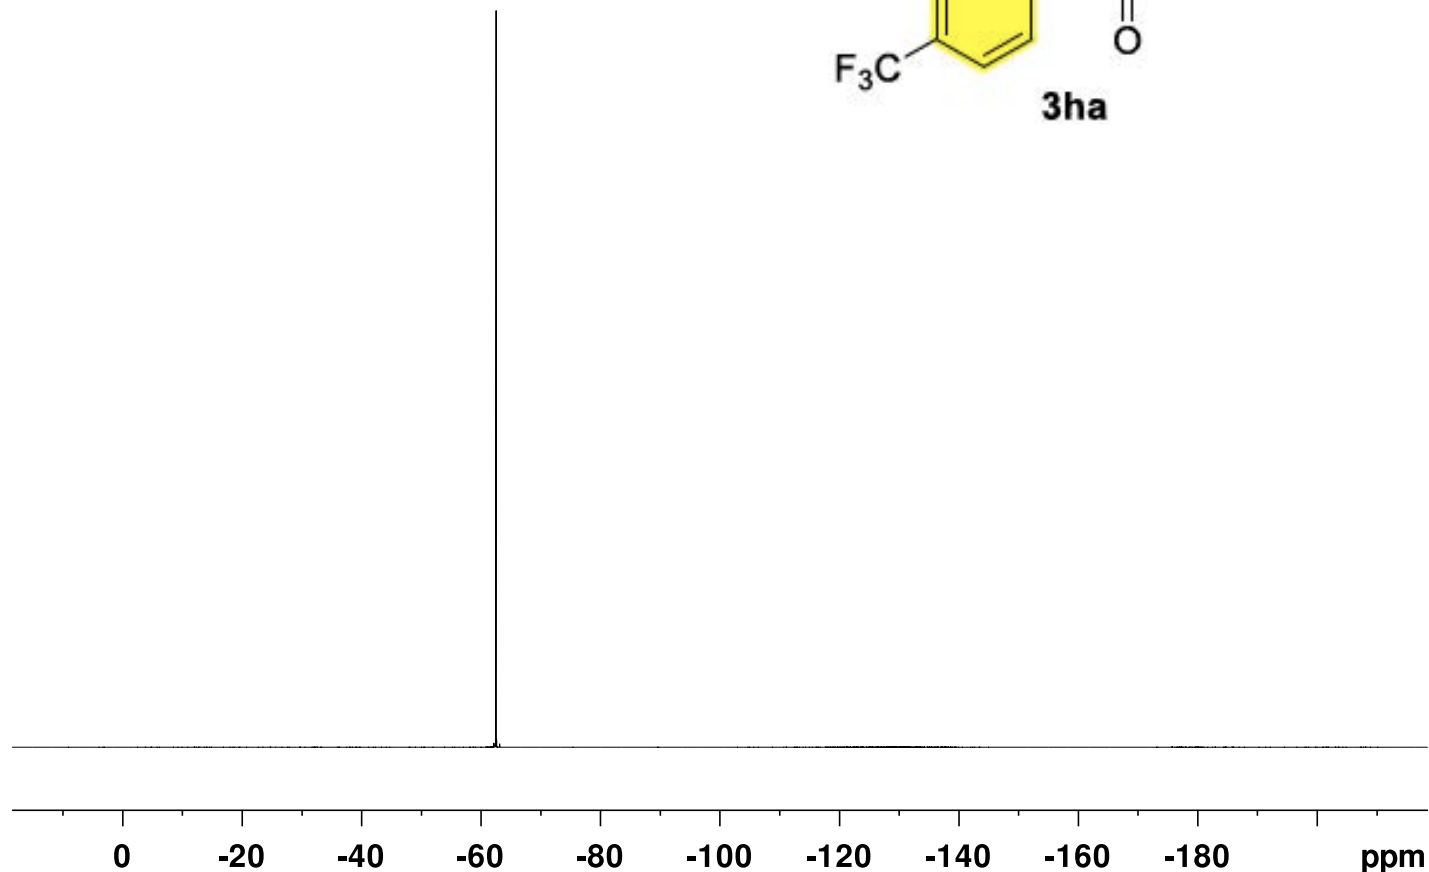



Current Data Parameters  
NAME HNMR-YX-4-p97  
EXPNO 805  
PROCNO 1

F2 - Acquisition Parameters  
Date\_ 20230620  
Time 15.41  
INSTRUM spect  
PROBHD 5 mm PABBO BB-  
PULPROG zg30  
TD 65536  
SOLVENT CDCl3  
NS 16  
DS 2  
SWH 6009.615 Hz  
FIDRES 0.091699 Hz  
AQ 5.4525952 sec  
RG 161  
DW 83.200 usec  
DE 6.50 usec  
TE 296.7 K  
D1 1.00000000 sec  
TD0 1

==== CHANNEL f1 =====  
SFO1 300.1318534 MHz  
NUC1 1H  
P1 10.00 usec  
PLW1 14.00000000 W

F2 - Processing parameters  
SI 65536  
SF 300.1300332 MHz  
WDW EM  
SSB 0  
LB 0.30 Hz  
GB 0  
PC 1.00

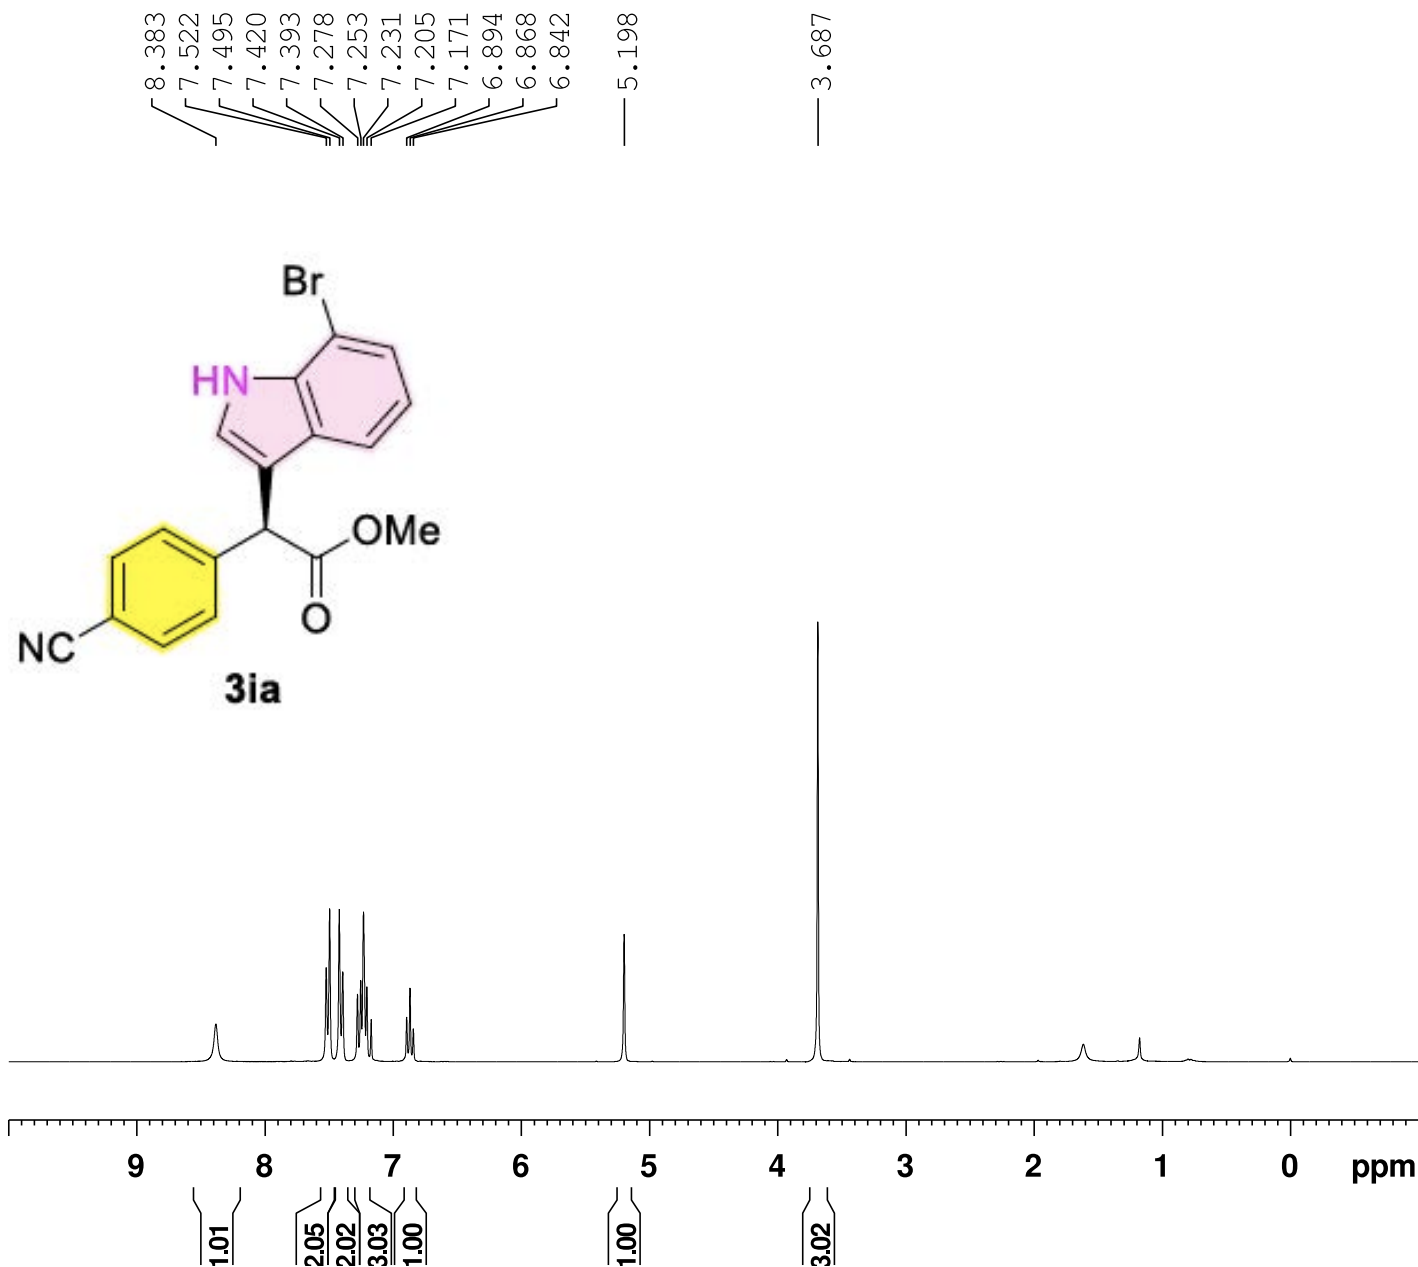

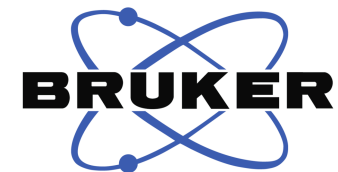

Current Data Parameters  
NAME CNMR-YX-4-p97  
EXPNO 806  
PROCNO 1

F2 - Acquisition Parameters

Date\_ 20230620  
Time 16.01  
INSTRUM spect  
PROBHD 5 mm PABBO BB-  
PULPROG zgpg30  
TD 65536  
SOLVENT CDC13  
NS 300  
DS 4  
SWH 18028.846 Hz  
FIDRES 0.275098 Hz  
AQ 1.8175317 sec  
RG 203  
DW 27.733 usec  
DE 6.50 usec  
TE 297.4 K  
D1 2.00000000 sec  
D11 0.03000000 sec  
TD0 1

==== CHANNEL f1 =====

SFO1 75.4752949 MHz  
NUC1 13C  
P1 9.50 usec  
PLW1 34.20000076 W

==== CHANNEL f2 =====

SFO2 300.1312005 MHz  
NUC2 1H  
CPDPRG[2] waltz16  
PCPD2 90.00 usec  
PLW2 14.00000000 W  
PLW12 0.17284000 W  
PLW13 0.14000000 W

F2 - Processing parameters

SI 32768  
SF 75.4677485 MHz  
WDW EM  
SSB 0  
LB 1.00 Hz  
GB 0  
PC 1.40

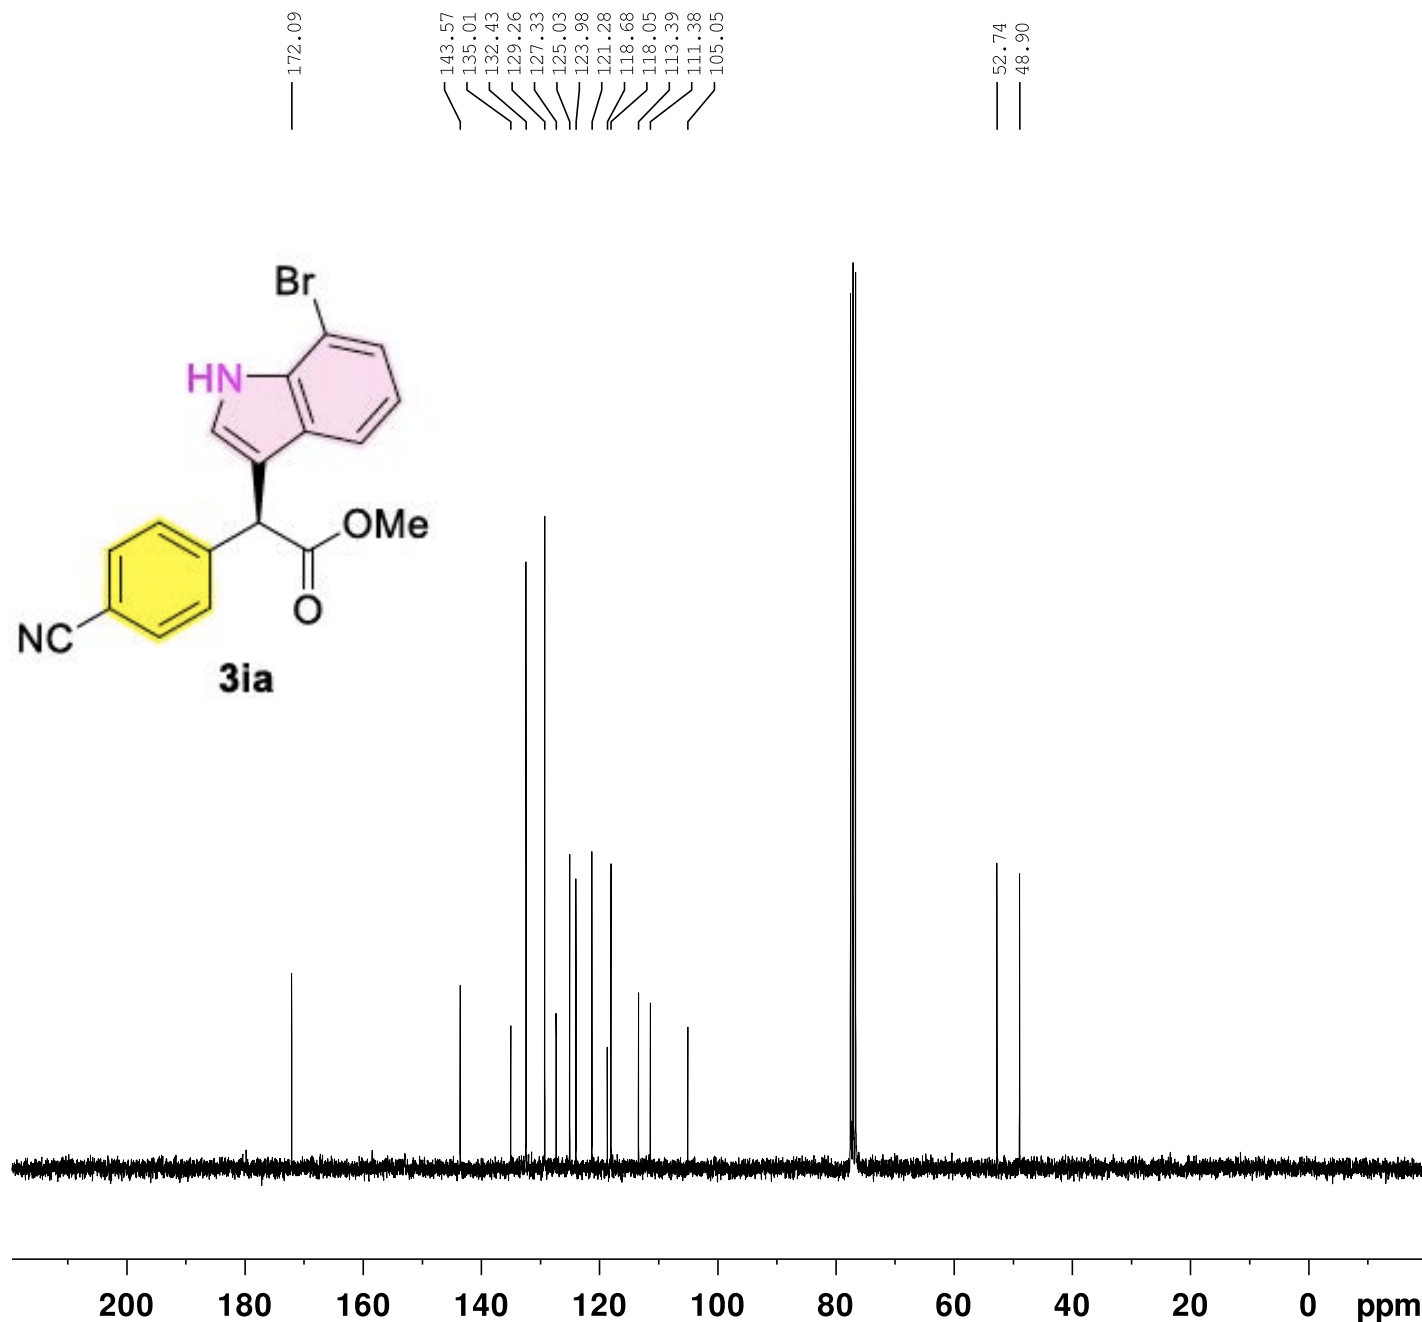



Current Data Parameters  
NAME HNMR-YX-4-p92  
EXPNO 755  
PROCNO 1

F2 - Acquisition Parameters  
Date\_ 20230619  
Time 21.48  
INSTRUM spect  
PROBHD 5 mm PABBO BB-  
PULPROG zg30  
TD 65536  
SOLVENT CDCl3  
NS 16  
DS 2  
SWH 6009.615 Hz  
FIDRES 0.091699 Hz  
AQ 5.4525952 sec  
RG 144  
DW 83.200 usec  
DE 6.50 usec  
TE 296.5 K  
D1 1.00000000 sec  
TD0 1

==== CHANNEL f1 =====  
SFO1 300.1318534 MHz  
NUC1 1H  
P1 10.00 usec  
PLW1 14.00000000 W

F2 - Processing parameters  
SI 65536  
SF 300.1300107 MHz  
WDW EM  
SSB 0  
LB 0.30 Hz  
GB 0  
PC 1.00

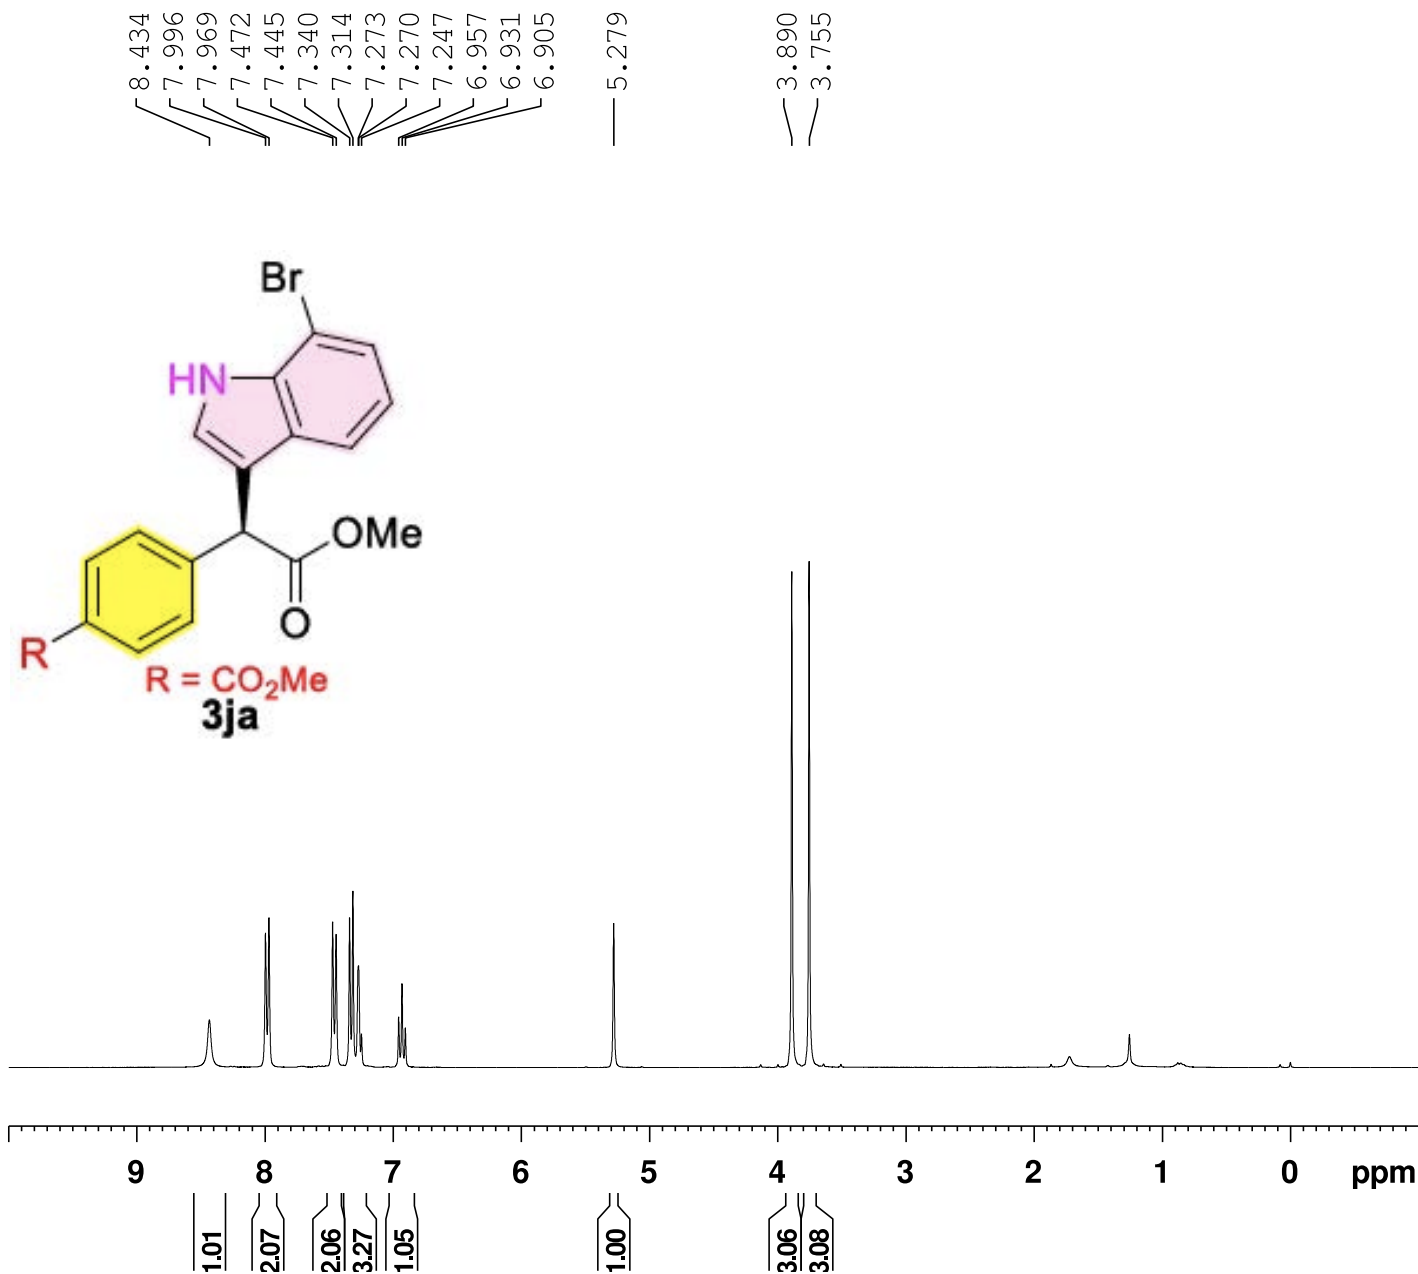



Current Data Parameters  
NAME CNMR-YX-4-p92  
EXPNO 756  
PROCNO 1

F2 - Acquisition Parameters

Date\_ 20230619  
Time 22.05  
INSTRUM spect  
PROBHD 5 mm PABBO BB-  
PULPROG zgpg30  
TD 65536  
SOLVENT CDC13  
NS 250  
DS 4  
SWH 18028.846 Hz  
FIDRES 0.275098 Hz  
AQ 1.8175317 sec  
RG 203  
DW 27.733 usec  
DE 6.50 usec  
TE 297.3 K  
D1 2.00000000 sec  
D11 0.03000000 sec  
TD0 1

==== CHANNEL f1 =====  
SFO1 75.4752949 MHz  
NUC1 13C  
P1 9.50 usec  
PLW1 34.20000076 W

==== CHANNEL f2 =====  
SFO2 300.1312005 MHz  
NUC2 1H  
CPDPRG[2] waltz16  
PCPD2 90.00 usec  
PLW2 14.00000000 W  
PLW12 0.17284000 W  
PLW13 0.14000000 W

F2 - Processing parameters  
SI 32768  
SF 75.4677485 MHz  
WDW EM  
SSB 0  
LB 1.00 Hz  
GB 0  
PC 1.40

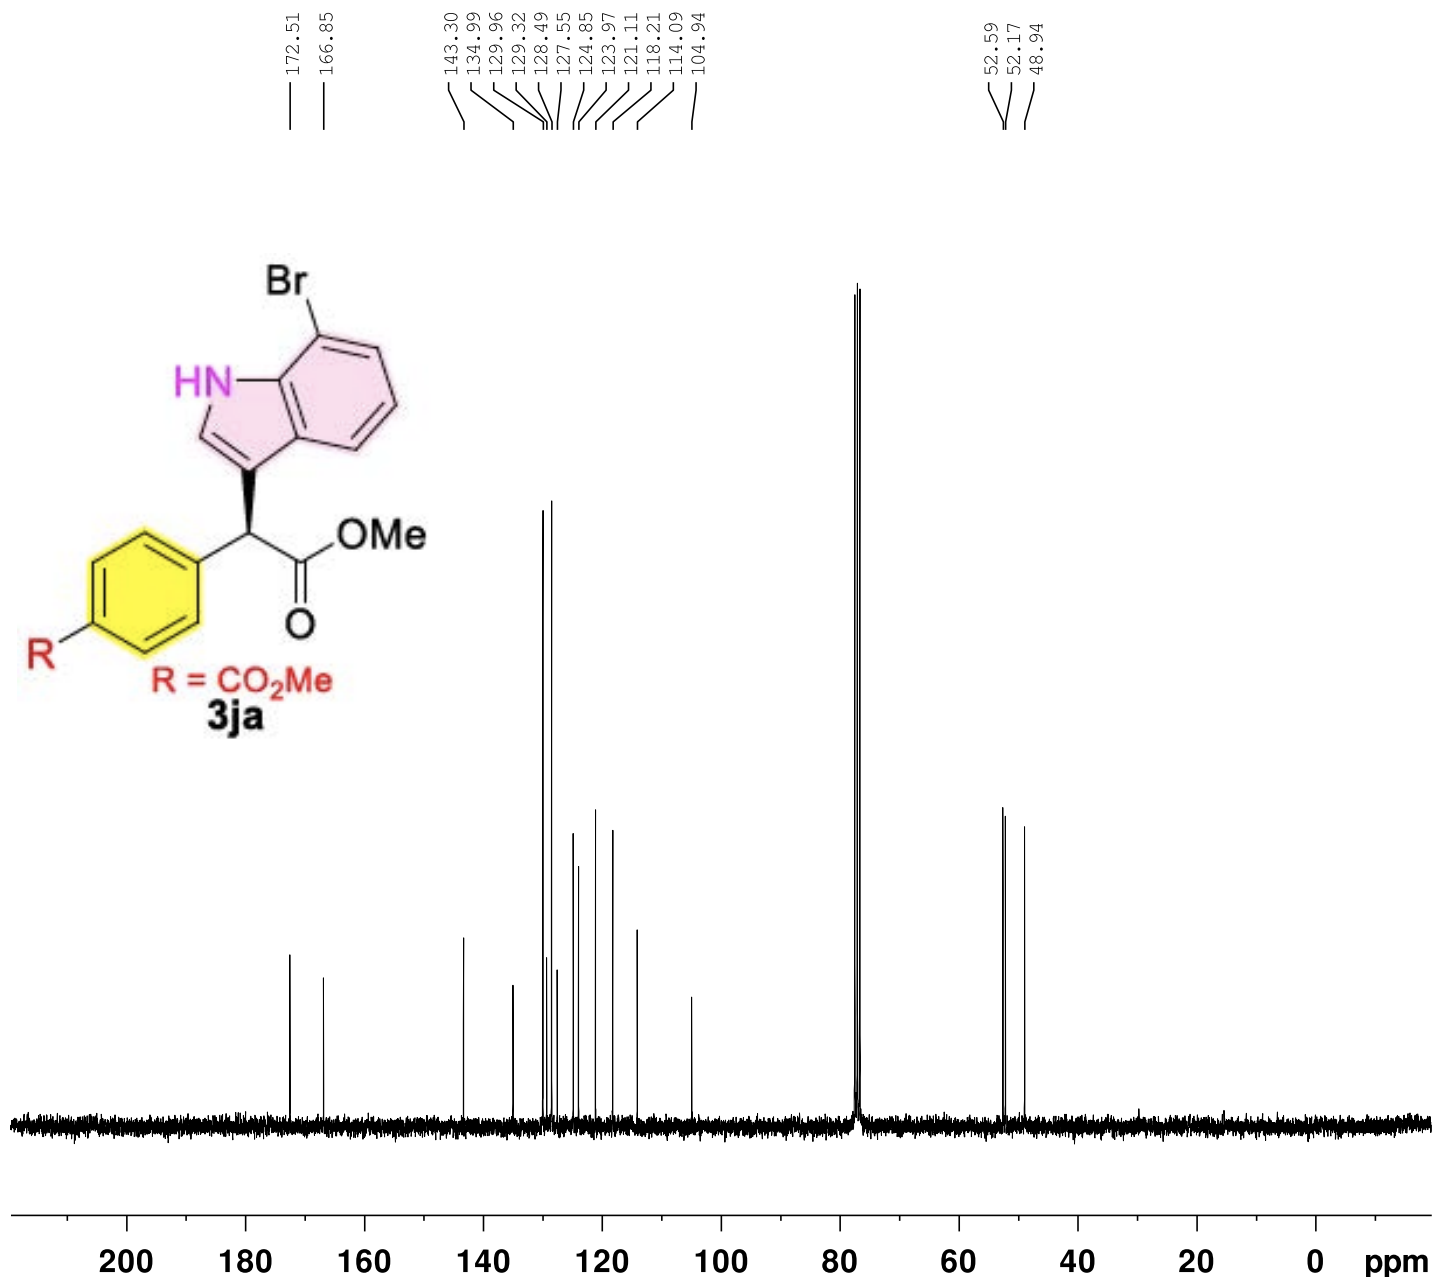



Current Data Parameters  
NAME HNMR-YX-4-p99  
EXPNO 725  
PROCNO 1

F2 - Acquisition Parameters

Date\_ 20230616  
Time 14.56  
INSTRUM spect  
PROBHD 5 mm PABBO BB-  
PULPROG zg30  
TD 65536  
SOLVENT CDCl3  
NS 16  
DS 2  
SWH 6009.615 Hz  
FIDRES 0.091699 Hz  
AQ 5.4525952 sec  
RG 128  
DW 83.200 usec  
DE 6.50 usec  
TE 296.6 K  
D1 1.00000000 sec  
TD0 1

==== CHANNEL f1 =====  
SFO1 300.1318534 MHz  
NUC1 1H  
P1 10.00 usec  
PLW1 14.00000000 W

F2 - Processing parameters

SI 65536  
SF 300.1300347 MHz  
WDW EM  
SSB 0  
LB 0.30 Hz  
GB 0  
PC 1.00

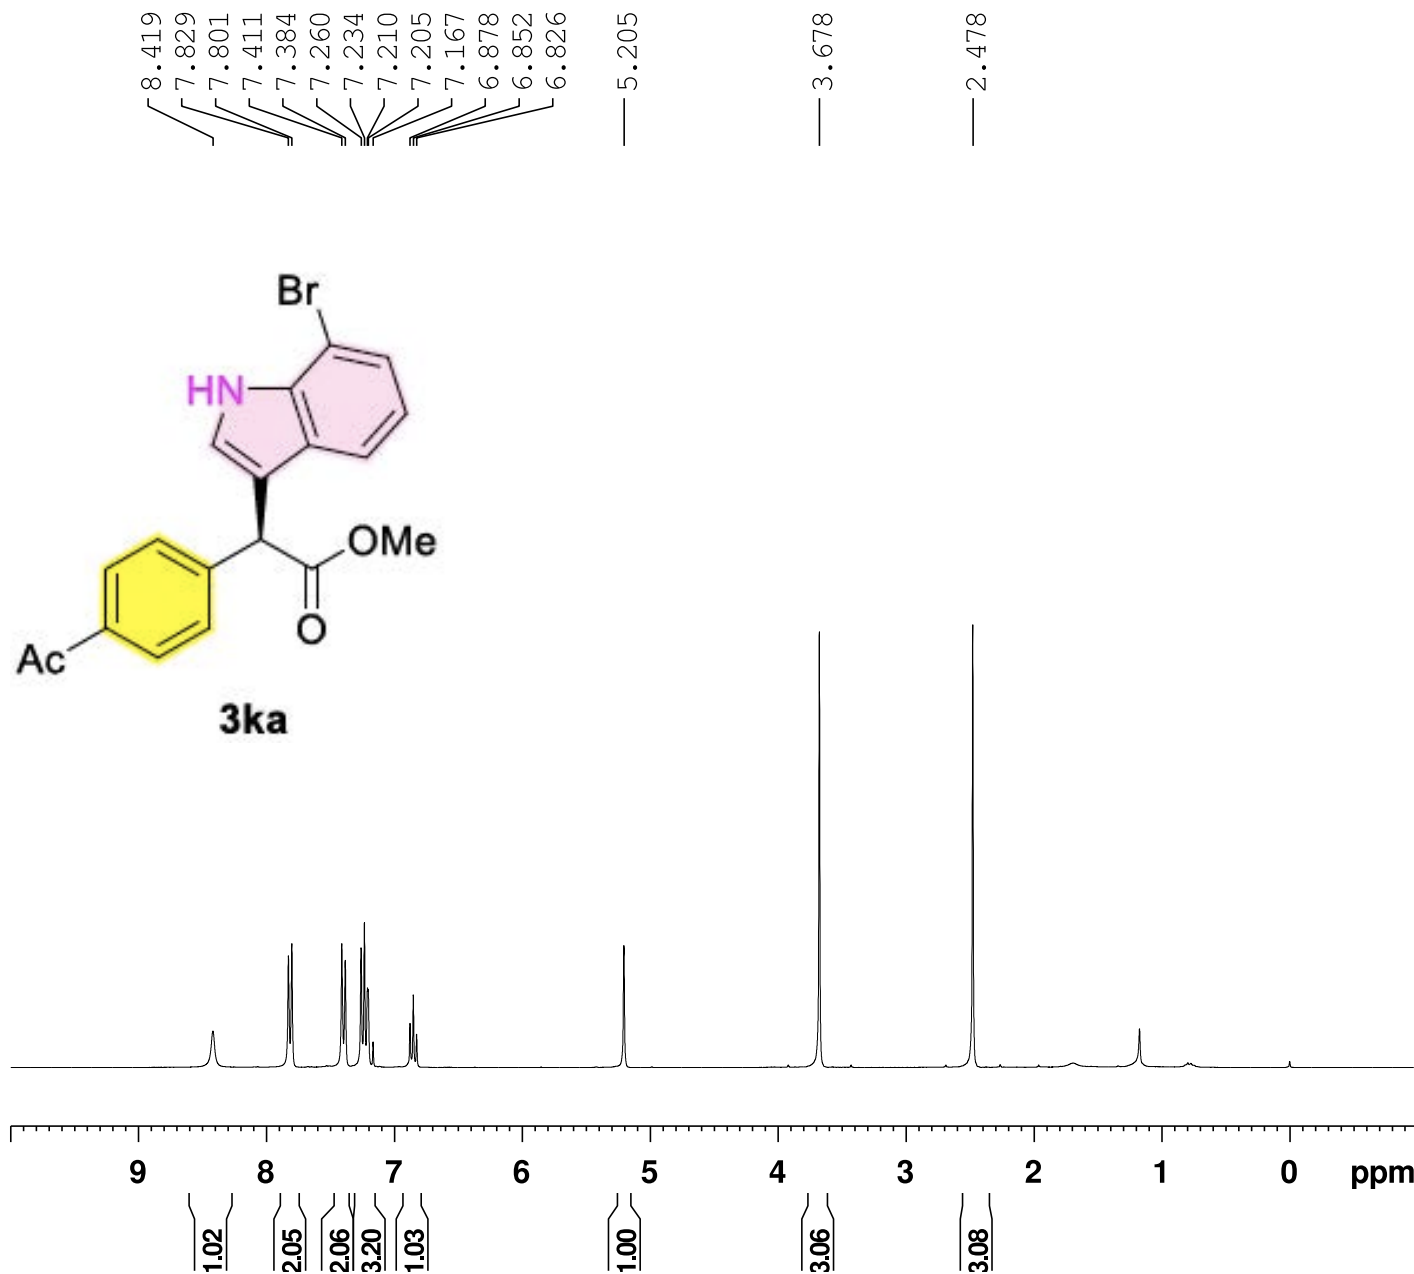





Current Data Parameters  
NAME CNMR-YX-4-p99  
EXPNO 759  
PROCNO 1

F2 - Acquisition Parameters

Date\_ 20230619  
Time 22.49  
INSTRUM spect  
PROBHD 5 mm PABBO BB-  
PULPROG zgpg30  
TD 65536  
SOLVENT CDC13  
NS 250  
DS 4  
SWH 18028.846 Hz  
FIDRES 0.275098 Hz  
AQ 1.8175317 sec  
RG 203  
DW 27.733 usec  
DE 6.50 usec  
TE 297.4 K  
D1 2.00000000 sec  
D11 0.03000000 sec  
TD0 1

==== CHANNEL f1 =====  
SFO1 75.4752949 MHz  
NUC1 13C  
P1 9.50 usec  
PLW1 34.20000076 W

==== CHANNEL f2 =====  
SFO2 300.1312005 MHz  
NUC2 1H  
CPDPRG[2] waltz16  
PCPD2 90.00 usec  
PLW2 14.00000000 W  
PLW12 0.17284000 W  
PLW13 0.14000000 W

F2 - Processing parameters  
SI 32768  
SF 75.4677485 MHz  
WDW EM  
SSB 0  
LB 1.00 Hz  
GB 0  
PC 1.40

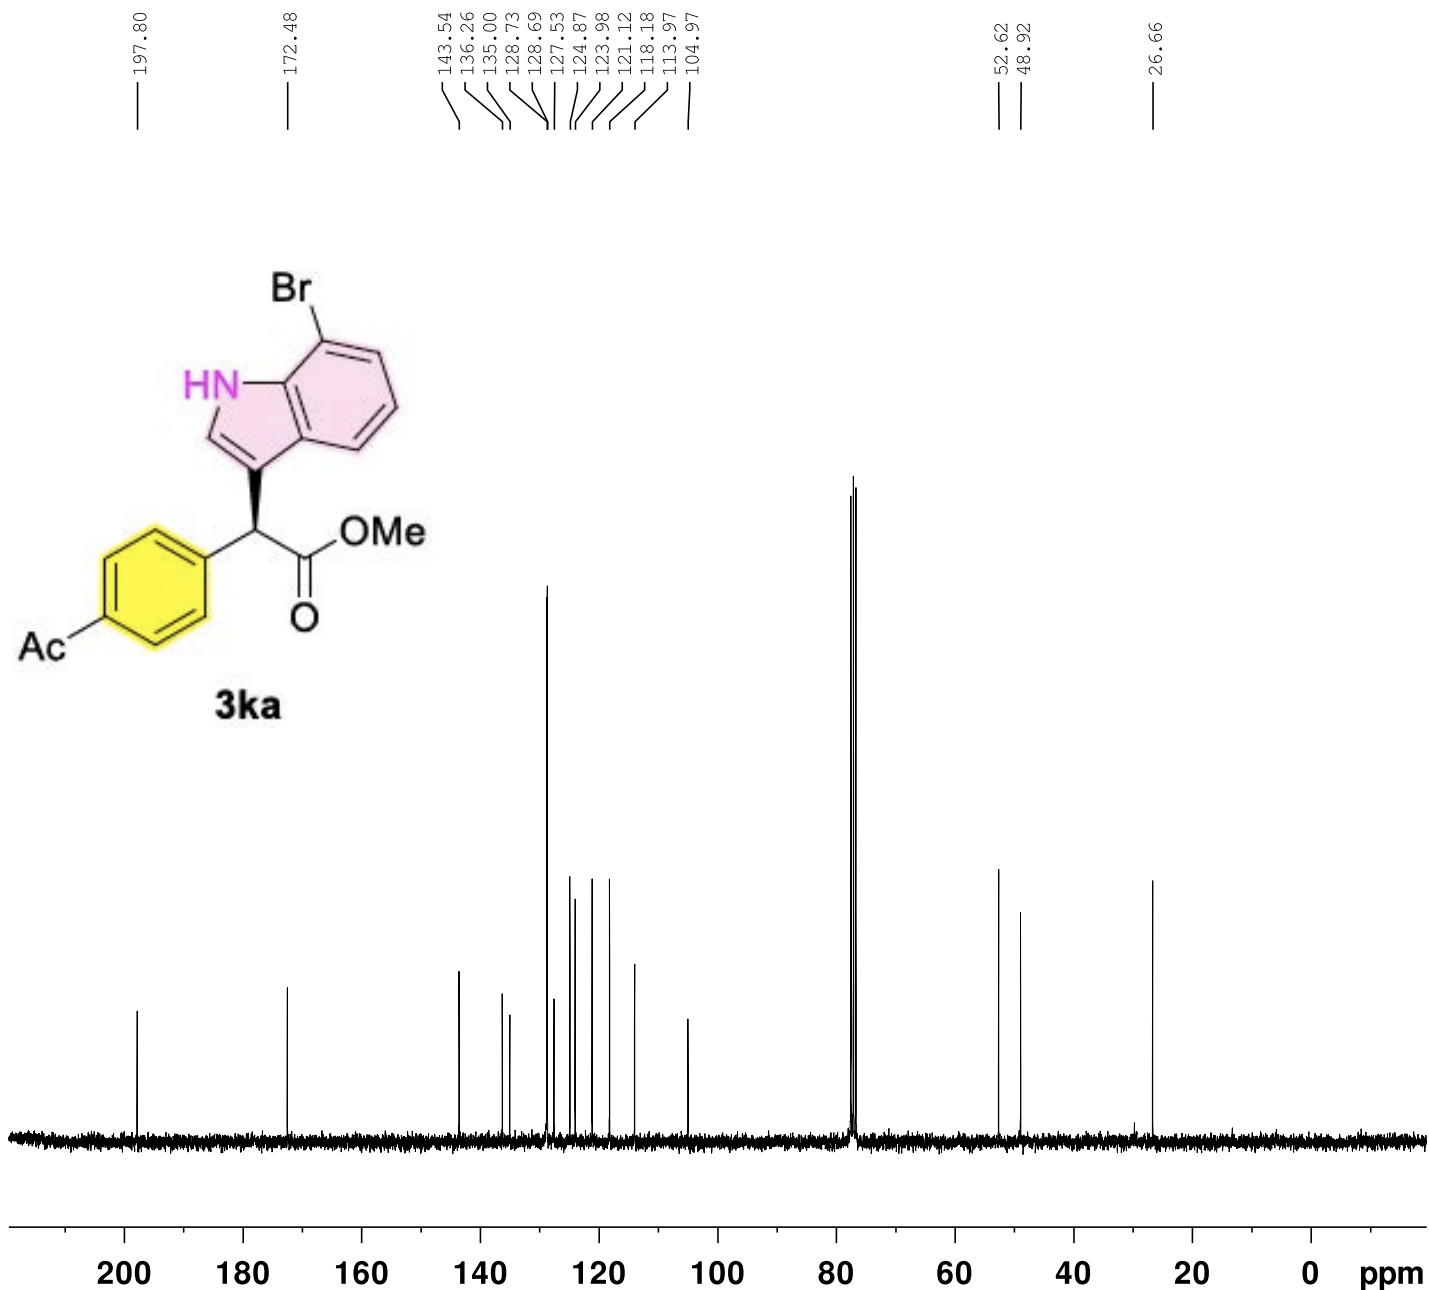



Current Data Parameters  
NAME HNMR-YX-4-p100  
EXPNO 701  
PROCNO 1

F2 - Acquisition Parameters

Date\_ 20230615  
Time 14.09  
INSTRUM spect  
PROBHD 5 mm PABBO BB-  
PULPROG zg30  
TD 65536  
SOLVENT CDCl3  
NS 16  
DS 2  
SWH 6009.615 Hz  
FIDRES 0.091699 Hz  
AQ 5.4525952 sec  
RG 90.5  
DW 83.200 usec  
DE 6.50 usec  
TE 296.8 K  
D1 1.00000000 sec  
TD0 1

==== CHANNEL f1 =====

SFO1 300.1318534 MHz  
NUC1 1H  
P1 10.00 usec  
PLW1 14.00000000 W

F2 - Processing parameters

SI 65536  
SF 300.1300413 MHz  
WDW EM  
SSB 0  
LB 0.30 Hz  
GB 0  
PC 1.00

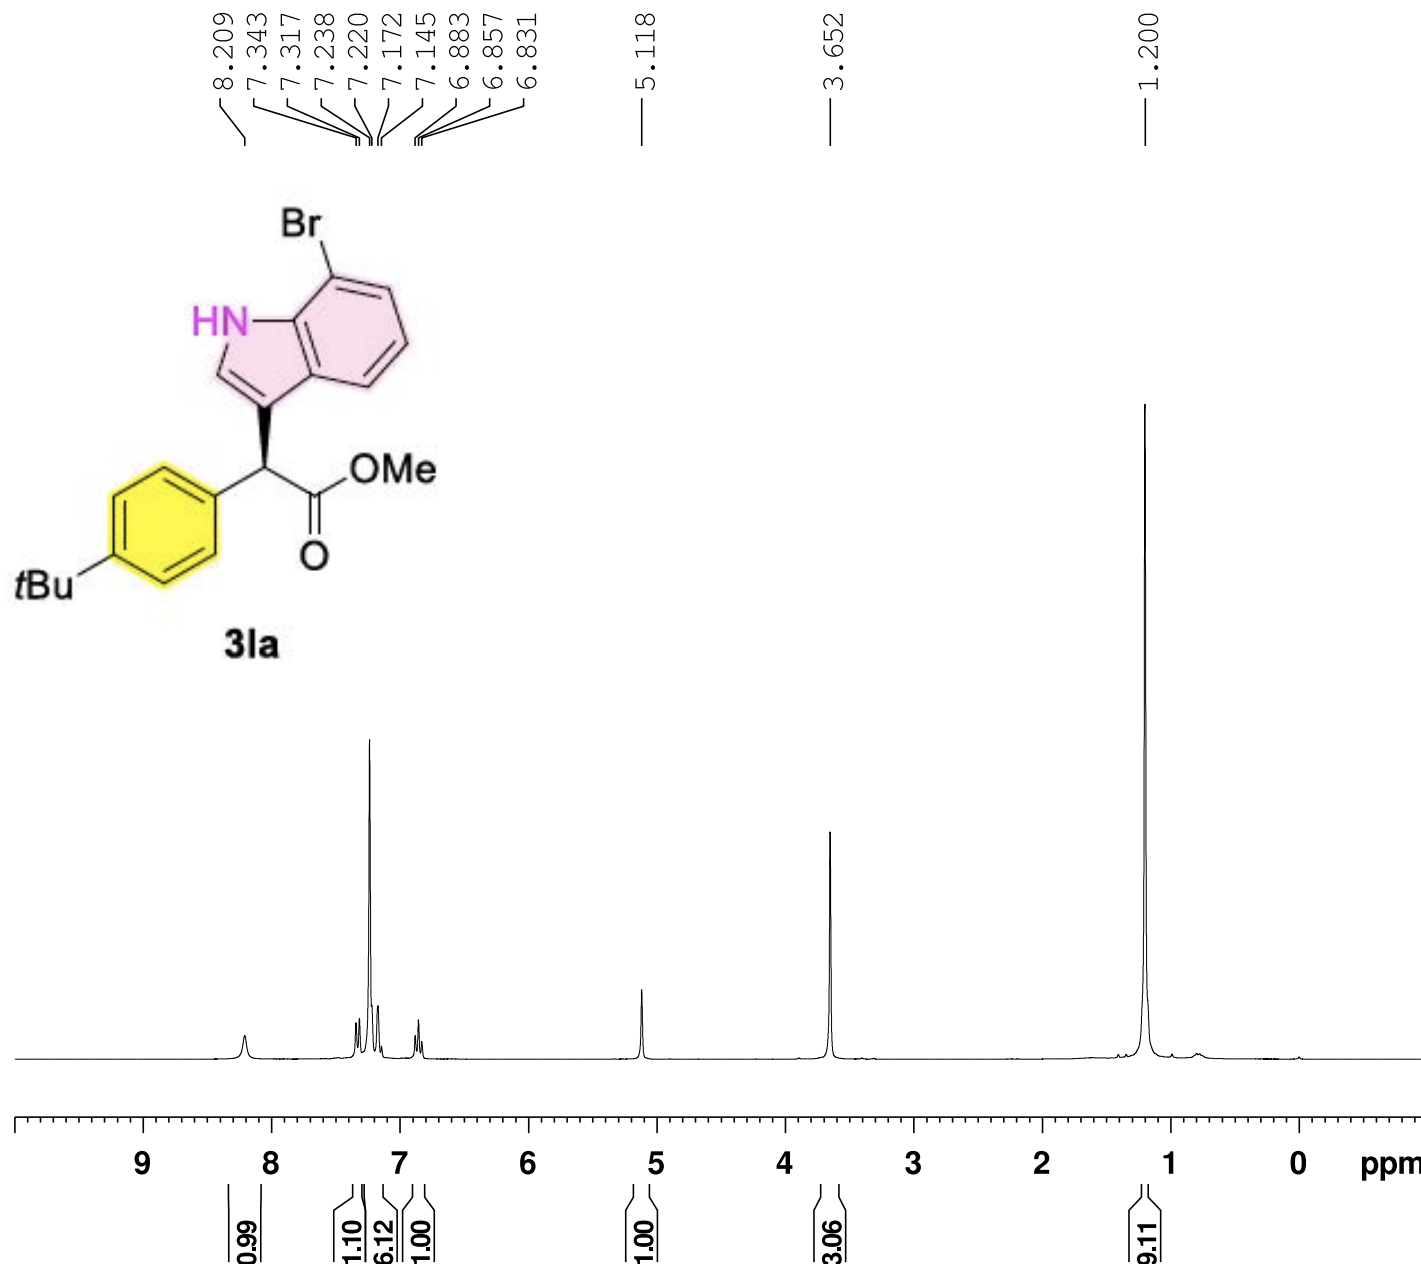



Current Data Parameters  
NAME CNMR-YX-4-p100  
EXPNO 707  
PROCNO 1

F2 - Acquisition Parameters  
Date\_ 20230615  
Time 15.20  
INSTRUM spect  
PROBHD 5 mm PABBO BB-  
PULPROG zgpg30  
TD 65536  
SOLVENT CDC13  
NS 200  
DS 4  
SWH 18028.846 Hz  
FIDRES 0.275098 Hz  
AQ 1.8175317 sec  
RG 203  
DW 27.733 usec  
DE 6.50 usec  
TE 297.5 K  
D1 2.00000000 sec  
D11 0.03000000 sec  
TD0 1

==== CHANNEL f1 =====  
SFO1 75.4752949 MHz  
NUC1 13C  
P1 9.50 usec  
PLW1 34.20000076 W  
  
==== CHANNEL f2 =====  
SFO2 300.1312005 MHz  
NUC2 1H  
CPDPRG[2] waltz16  
PCPD2 90.00 usec  
PLW2 14.00000000 W  
PLW12 0.17284000 W  
PLW13 0.14000000 W

F2 - Processing parameters  
SI 32768  
SF 75.4677485 MHz  
WDW EM  
SSB 0  
LB 1.00 Hz  
GB 0  
PC 1.40

173.36  
150.24  
135.14  
134.95  
127.96  
127.83  
125.60  
124.64  
123.88  
120.93  
118.38  
115.16  
104.85

52.38  
48.48  
34.49  
31.36

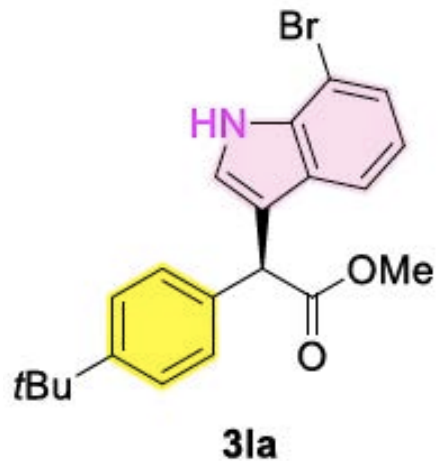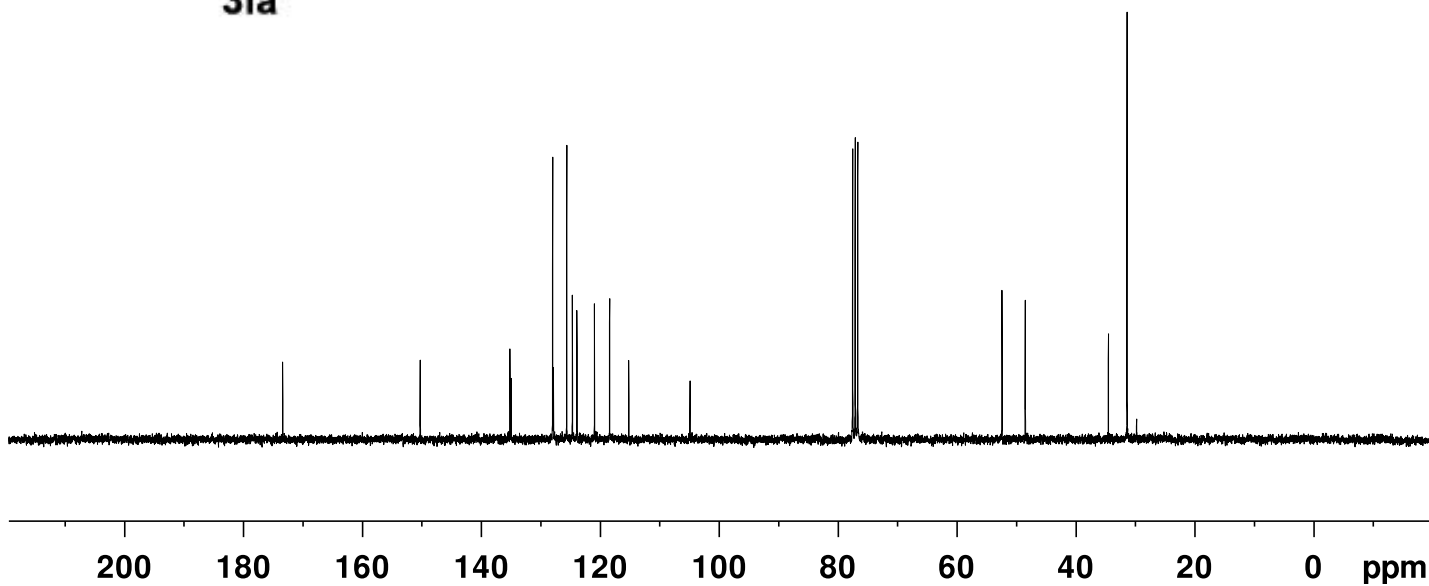



Current Data Parameters  
NAME HNMR-YX-4-p96  
EXPNO 723  
PROCNO 1

F2 - Acquisition Parameters  
Date\_ 20230616  
Time 14.45  
INSTRUM spect  
PROBHD 5 mm PABBO BB-  
PULPROG zg30  
TD 65536  
SOLVENT CDCl3  
NS 16  
DS 2  
SWH 6009.615 Hz  
FIDRES 0.091699 Hz  
AQ 5.4525952 sec  
RG 101  
DW 83.200 usec  
DE 6.50 usec  
TE 296.8 K  
D1 1.00000000 sec  
TD0 1

==== CHANNEL f1 =====  
SFO1 300.1318534 MHz  
NUC1 1H  
P1 10.00 usec  
PLW1 14.00000000 W

F2 - Processing parameters  
SI 65536  
SF 300.1300439 MHz  
WDW EM  
SSB 0  
LB 0.30 Hz  
GB 0  
PC 1.00

8.213  
7.319  
7.293  
7.237  
7.211  
7.155  
6.918  
6.875  
6.849  
6.806

5.065

3.652

2.179

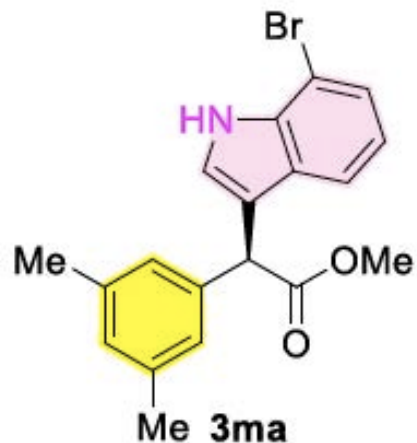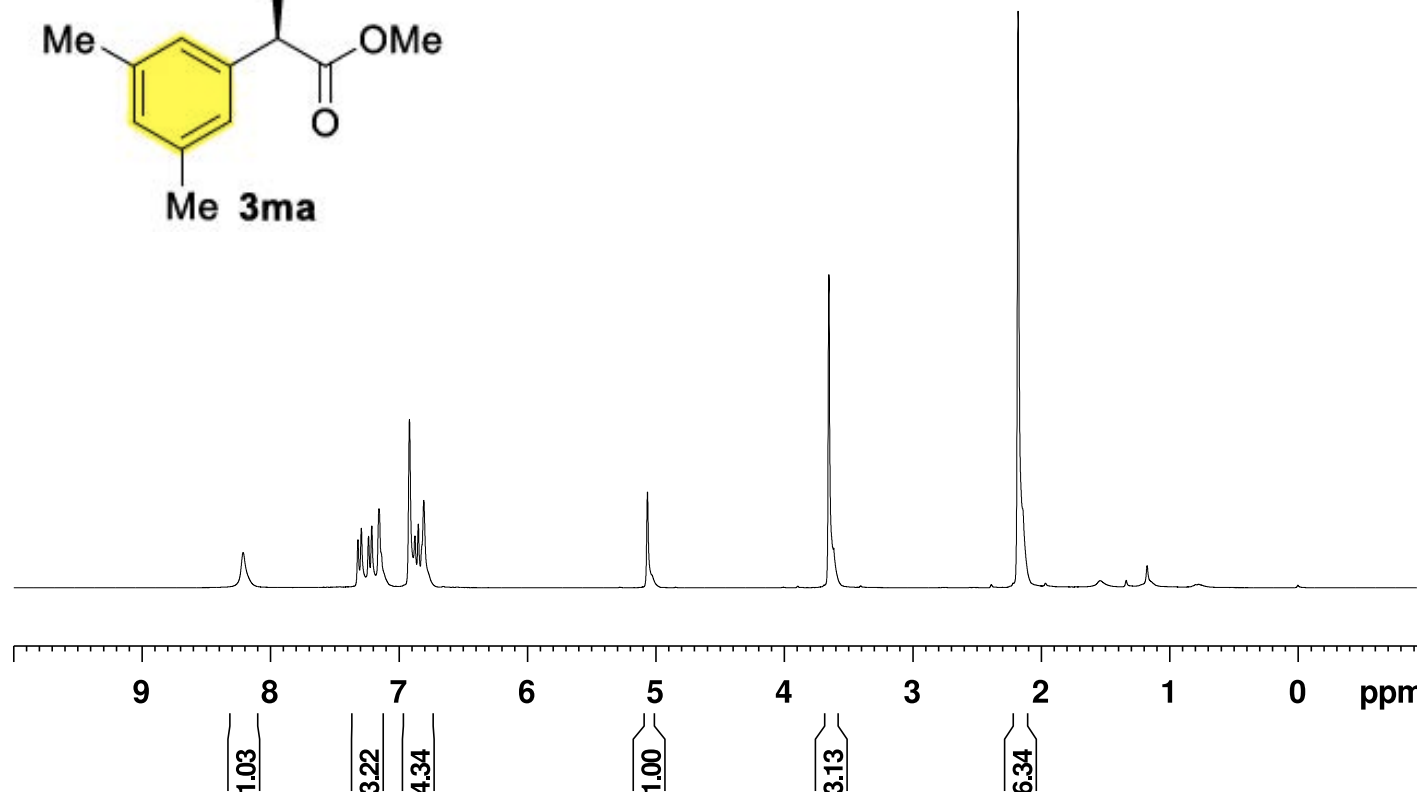



Current Data Parameters  
NAME CNMR-YX-4-p96  
EXPNO 731  
PROCNO 1

F2 - Acquisition Parameters

Date\_ 20230616  
Time 16.28  
INSTRUM spect  
PROBHD 5 mm PABBO BB-  
PULPROG zgpg30  
TD 65536  
SOLVENT CDCl3  
NS 200  
DS 4  
SWH 18028.846 Hz  
FIDRES 0.275098 Hz  
AQ 1.8175317 sec  
RG 203  
DW 27.733 usec  
DE 6.50 usec  
TE 297.1 K  
D1 2.00000000 sec  
D11 0.03000000 sec  
TD0 1

===== CHANNEL f1 =====

SFO1 75.4752949 MHz  
NUC1 13C  
P1 9.50 usec  
PLW1 34.20000076 W

===== CHANNEL f2 =====

SFO2 300.1312005 MHz  
NUC2 1H  
CPDPRG[2] waltz16  
PCPD2 90.00 usec  
PLW2 14.00000000 W  
PLW12 0.17284000 W  
PLW13 0.14000000 W

F2 - Processing parameters

SI 32768  
SF 75.4677485 MHz  
WDW EM  
SSB 0  
LB 1.00 Hz  
GB 0  
PC 1.40

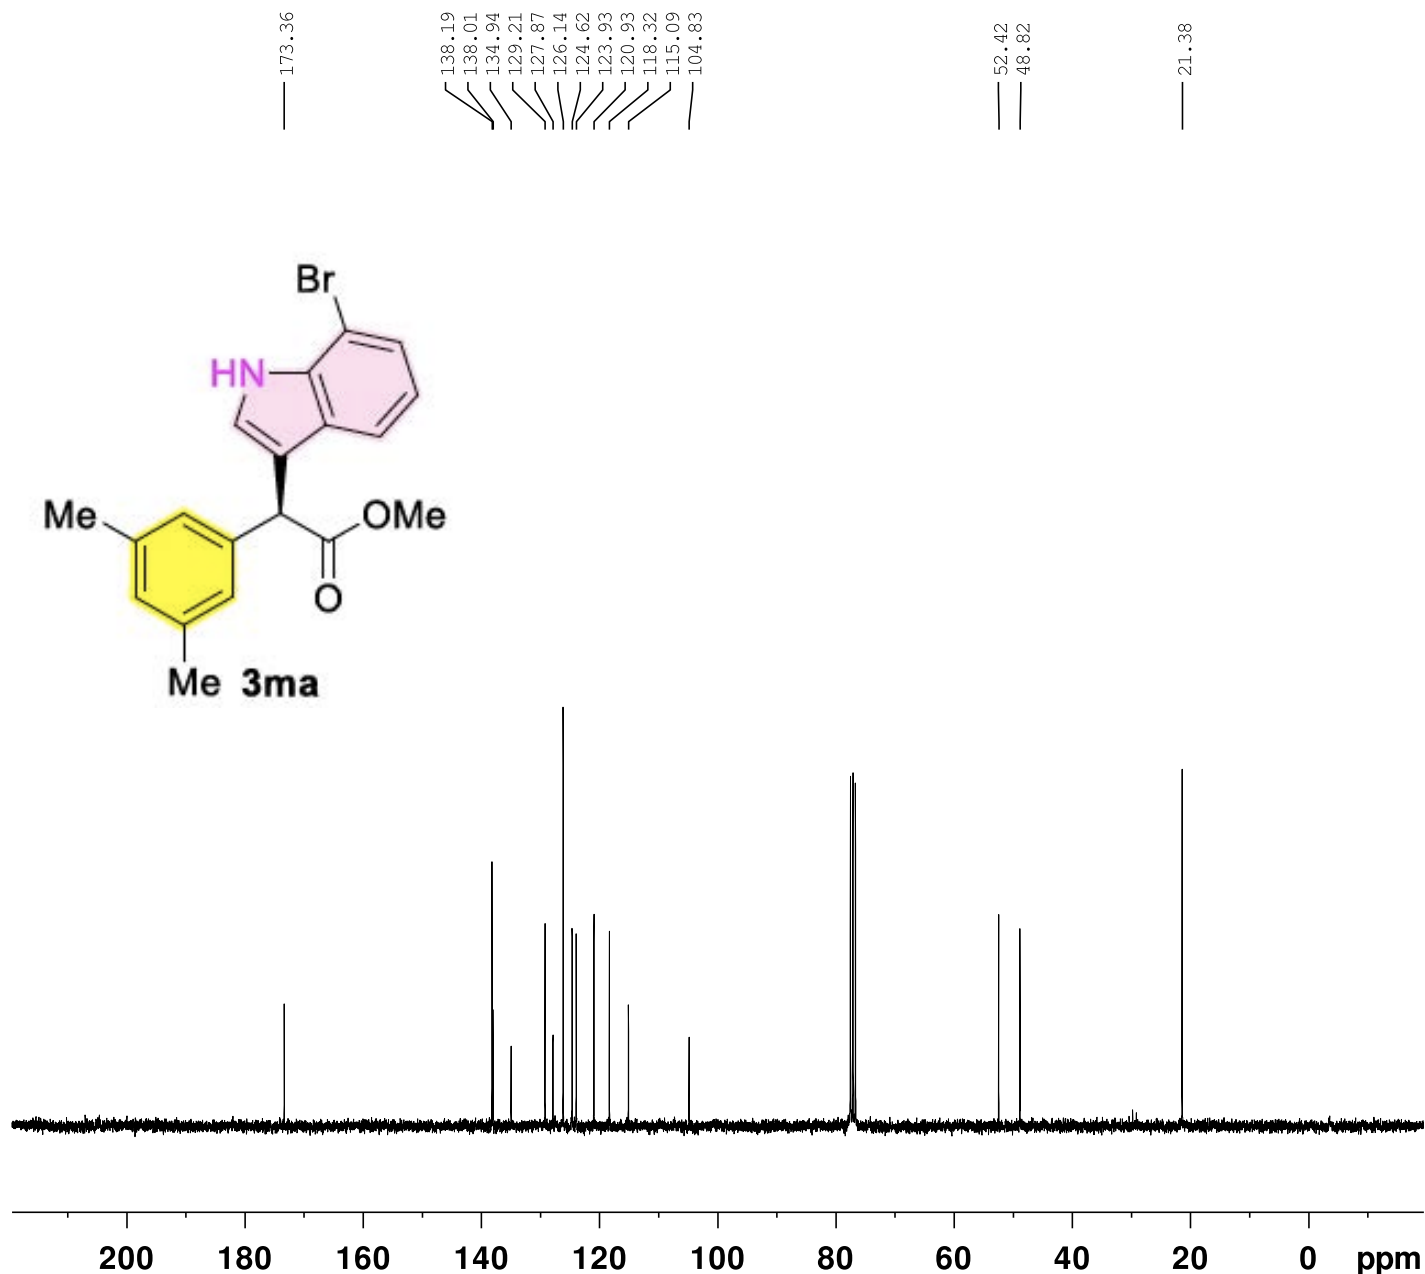



Current Data Parameters  
NAME HNMR-YX-4-p91  
EXPNO 533  
PROCNO 1

F2 - Acquisition Parameters  
Date\_ 20230612  
Time 16.04  
INSTRUM spect  
PROBHD 5 mm PABBO BB-  
PULPROG zg30  
TD 65536  
SOLVENT CDCl3  
NS 16  
DS 2  
SWH 6009.615 Hz  
FIDRES 0.091699 Hz  
AQ 5.4525952 sec  
RG 128  
DW 83.200 usec  
DE 6.50 usec  
TE 296.5 K  
D1 1.00000000 sec  
TD0 1

==== CHANNEL f1 =====  
SFO1 300.1318534 MHz  
NUC1 1H  
P1 10.00 usec  
PLW1 14.00000000 W

F2 - Processing parameters  
SI 65536  
SF 300.1300434 MHz  
WDW EM  
SSB 0  
LB 0.30 Hz  
GB 0  
PC 1.00

8.232  
7.747  
7.704  
7.678  
7.439  
7.411  
7.369  
7.359  
7.349  
7.339  
7.312  
7.285  
7.237  
7.212  
7.185  
7.137  
6.849  
6.823  
6.797  
5.303

3.673

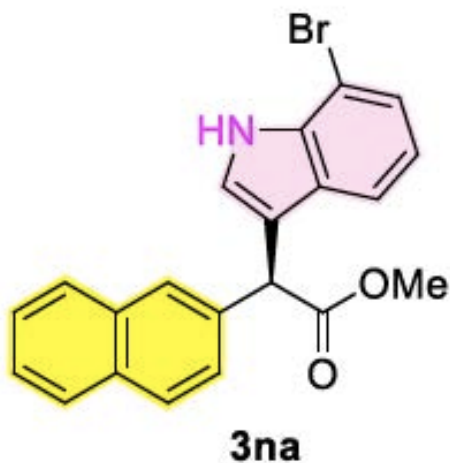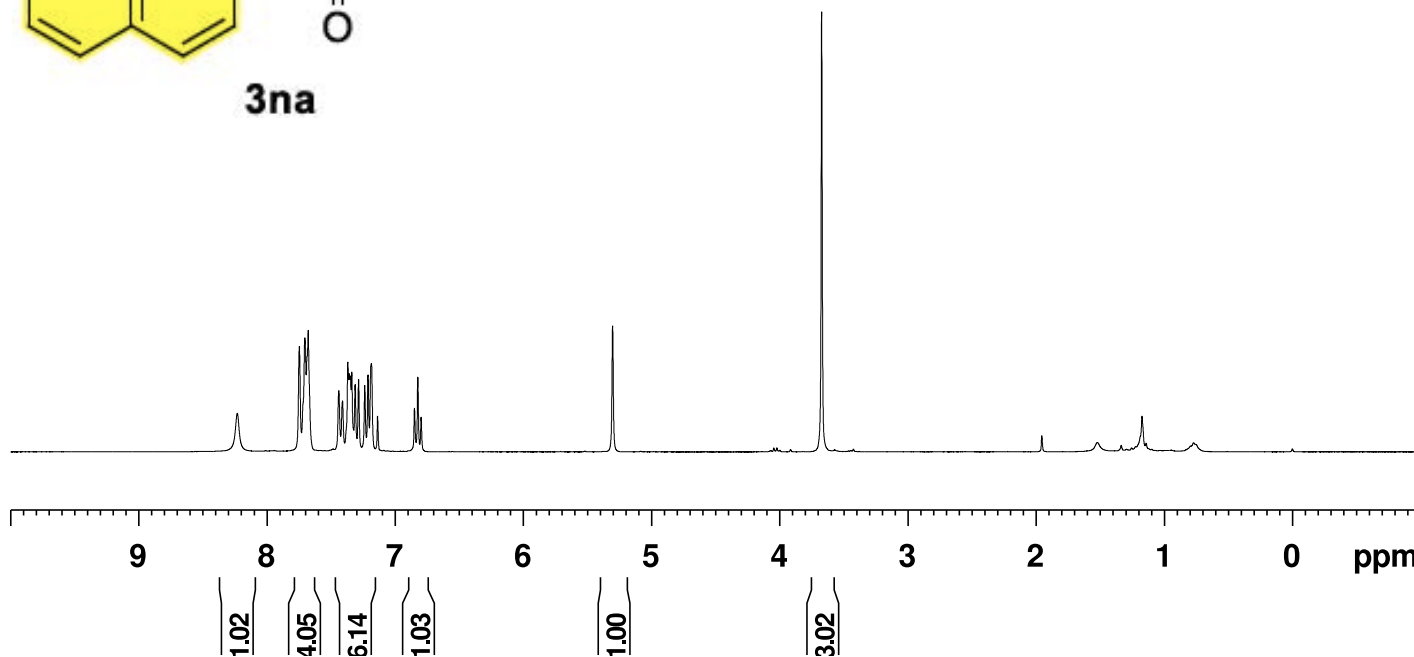



Current Data Parameters  
NAME CNMR-YX-4-p91  
EXPNO 534  
PROCNO 1

F2 - Acquisition Parameters

Date\_ 20230612  
Time 16.11  
INSTRUM spect  
PROBHD 5 mm PABBO BB-  
PULPROG zgpg30  
TD 65536  
SOLVENT CDC13  
NS 100  
DS 4  
SWH 18028.846 Hz  
FIDRES 0.275098 Hz  
AQ 1.8175317 sec  
RG 203  
DW 27.733 usec  
DE 6.50 usec  
TE 297.2 K  
D1 2.00000000 sec  
D11 0.03000000 sec  
TD0 1

==== CHANNEL f1 =====

SFO1 75.4752949 MHz  
NUC1 13C  
P1 9.50 usec  
PLW1 34.20000076 W

==== CHANNEL f2 =====

SFO2 300.1312005 MHz  
NUC2 1H  
CPDPRG[2] waltz16  
PCPD2 90.00 usec  
PLW2 14.00000000 W  
PLW12 0.17284000 W  
PLW13 0.14000000 W

F2 - Processing parameters

SI 32768  
SF 75.4677485 MHz  
WDW EM  
SSB 0  
LB 1.00 Hz  
GB 0  
PC 1.40

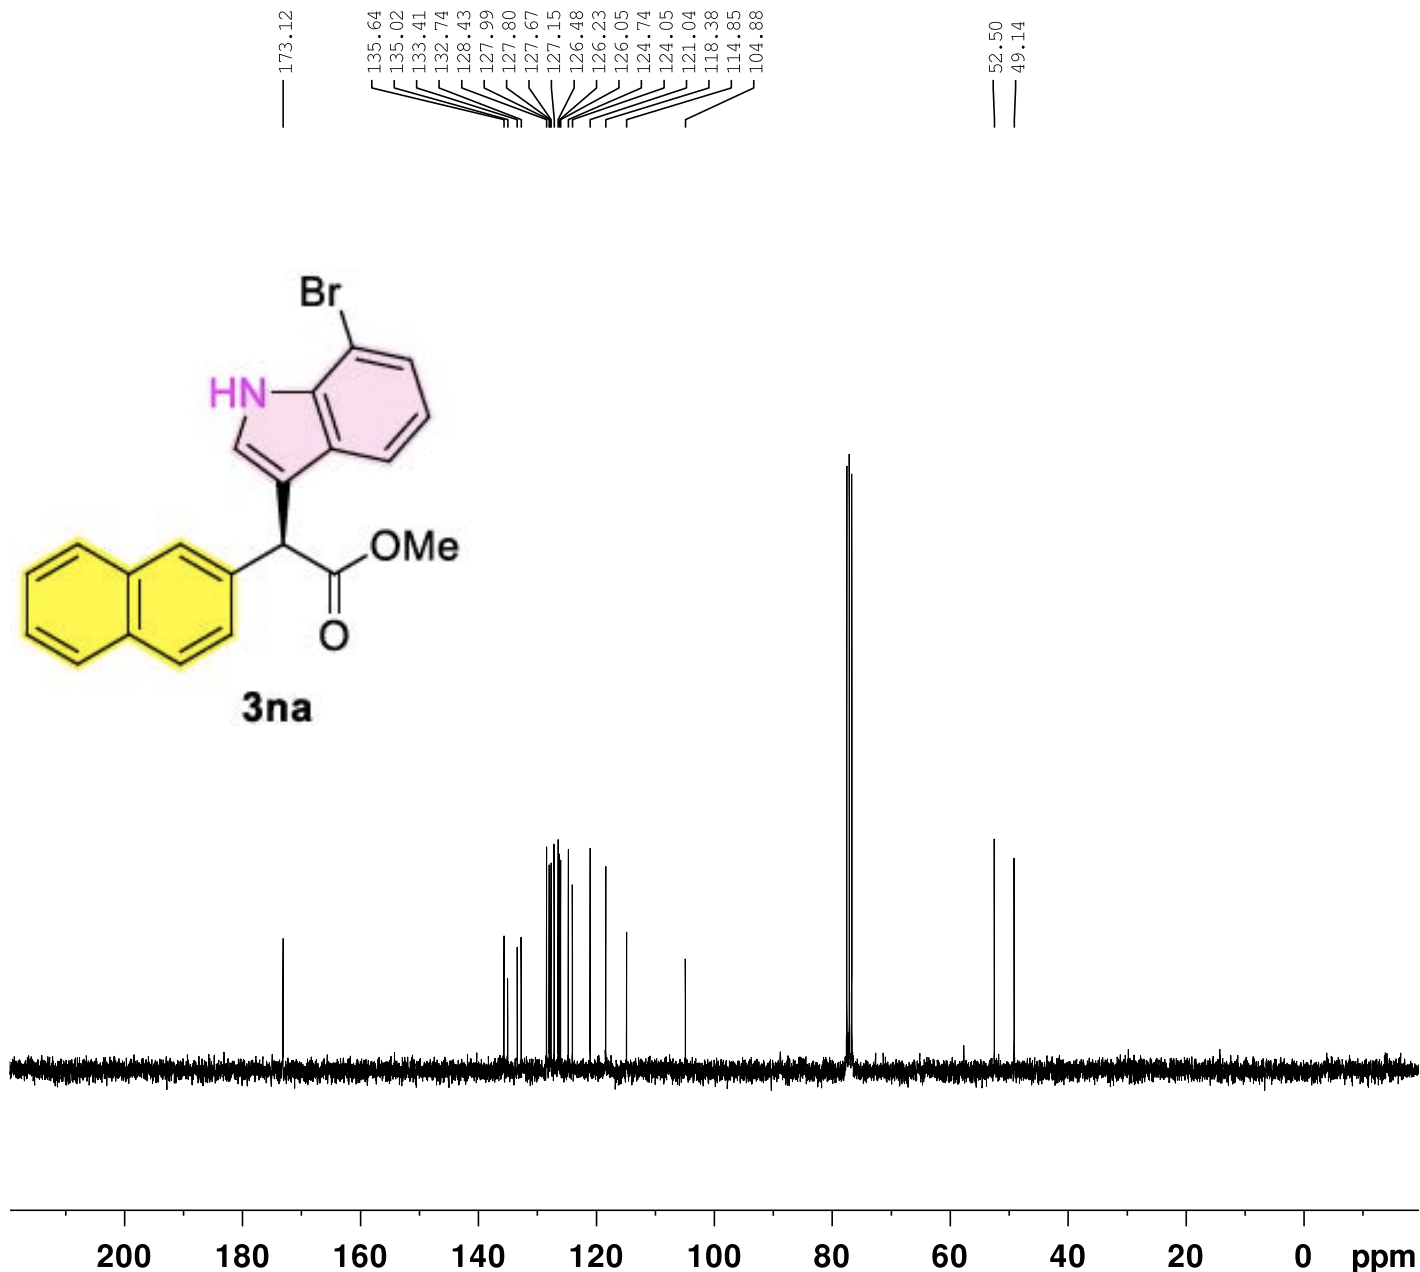



Current Data Parameters  
NAME HNMR-YX-5-p49  
EXPNO 1  
PROCNO 1

F2 - Acquisition Parameters  
Date\_ 20230729  
Time 8.14 h  
INSTRUM Avance  
PROBHD z116098\_0833 (  
PULPROG zg30  
TD 65536  
SOLVENT CDCl3  
NS 16  
DS 2  
SWH 8196.722 Hz  
FIDRES 0.250144 Hz  
AQ 3.9976959 sec  
RG 101  
DW 61.000 usec  
DE 13.54 usec  
TE 294.4 K  
D1 1.00000000 sec  
TD0 1  
SFO1 400.1324708 MHz  
NUC1 1H  
P0 3.33 usec  
P1 10.00 usec  
PLW1 20.73200035 W

F2 - Processing parameters  
SI 65536  
SF 400.1300498 MHz  
WDW EM  
SSB 0  
LB 0.30 Hz  
GB 0  
PC 1.00

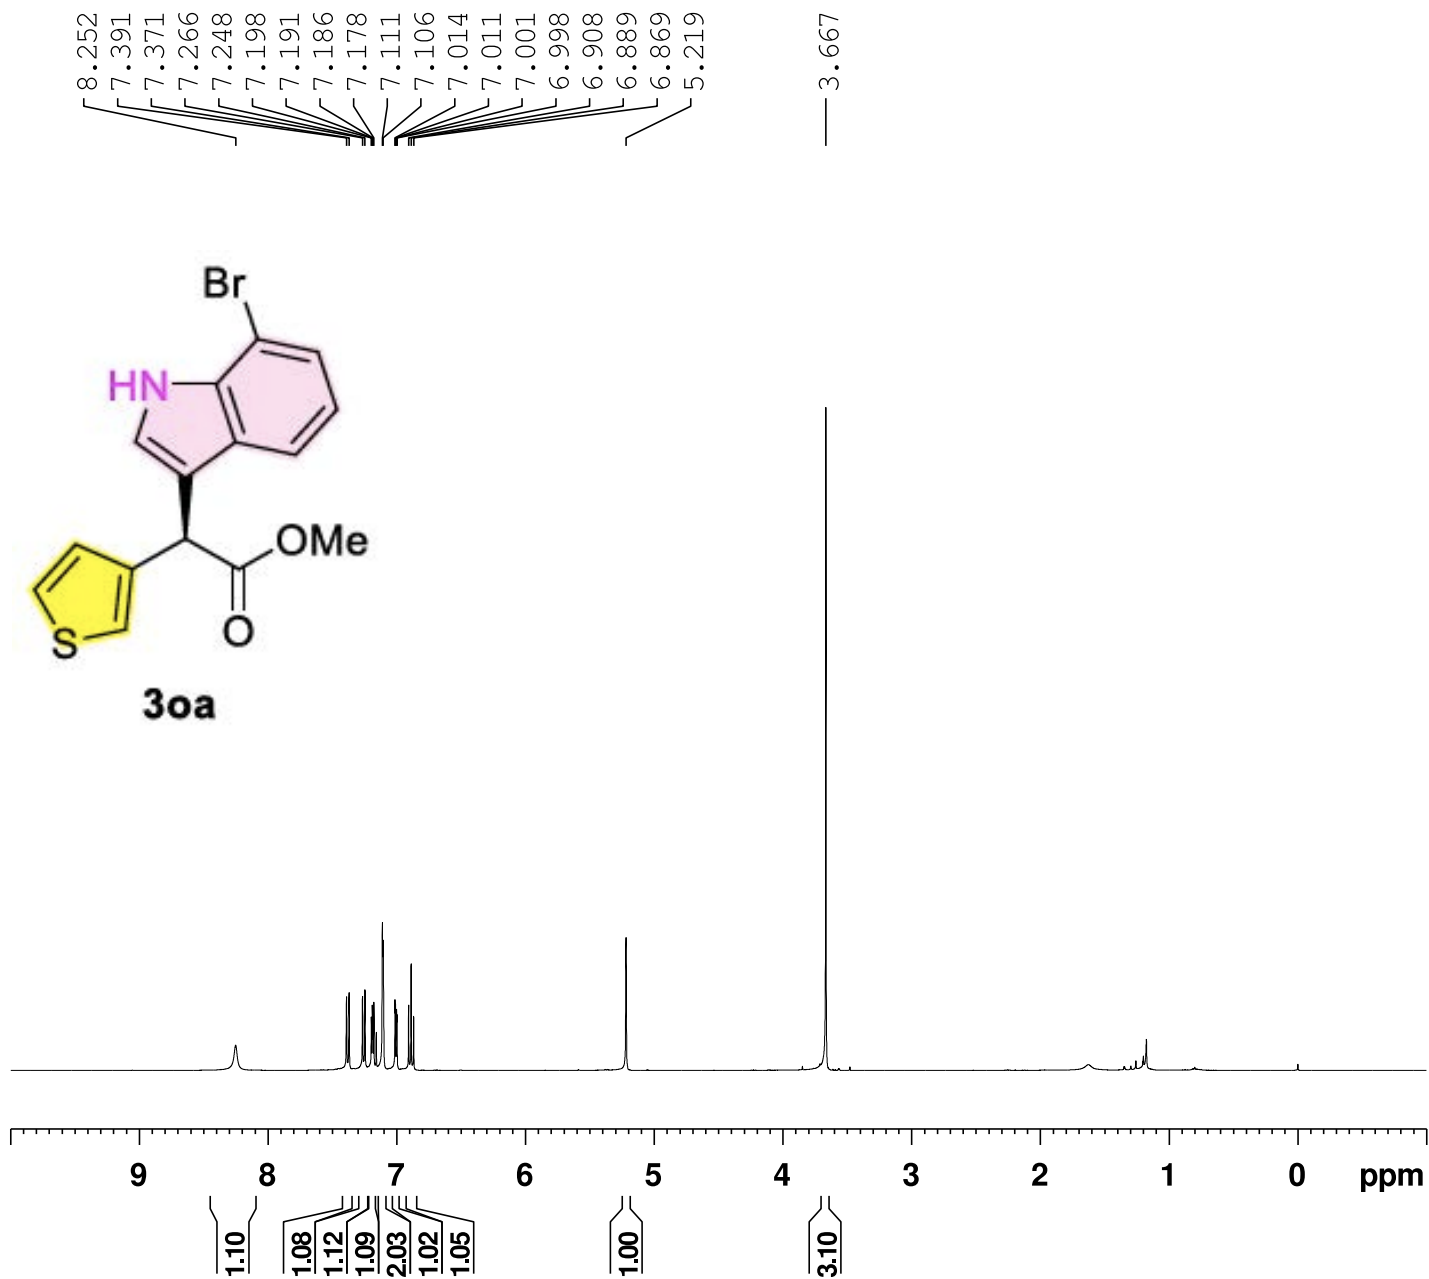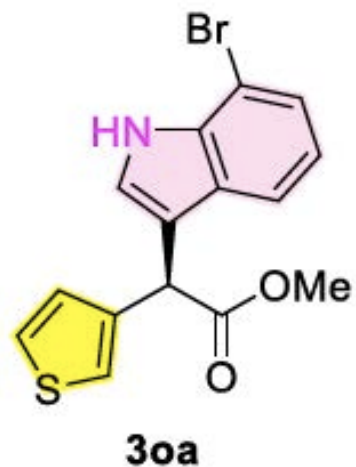





Current Data Parameters  
NAME CNMR-YX-5-p49  
EXPNO 2  
PROCNO 1

F2 - Acquisition Parameters  
Date\_ 20230729  
Time 8.27 h  
INSTRUM Avance  
PROBHD z116098\_0833 (  
PULPROG zgpg30  
TD 65536  
SOLVENT CDC13  
NS 200  
DS 4  
SWH 23809.523 Hz  
FIDRES 0.726609 Hz  
AQ 1.3762560 sec  
RG 44.8788  
DW 21.000 usec  
DE 6.50 usec  
TE 294.7 K  
D1 2.00000000 sec  
D11 0.03000000 sec  
TD0 1  
SFO1 100.6228298 MHz  
NUC1 13C  
P0 3.33 usec  
P1 10.00 usec  
PLW1 87.89900208 W  
SFO2 400.1316005 MHz  
NUC2 1H  
CPDPRG[2] waltz65  
PCPD2 90.00 usec  
PLW2 20.73200035 W  
PLW12 0.25595000 W  
PLW13 0.12874000 W

F2 - Processing parameters  
SI 32768  
SF 100.6127685 MHz  
WDW EM  
SSB 0  
LB 1.00 Hz  
GB 0  
PC 1.40

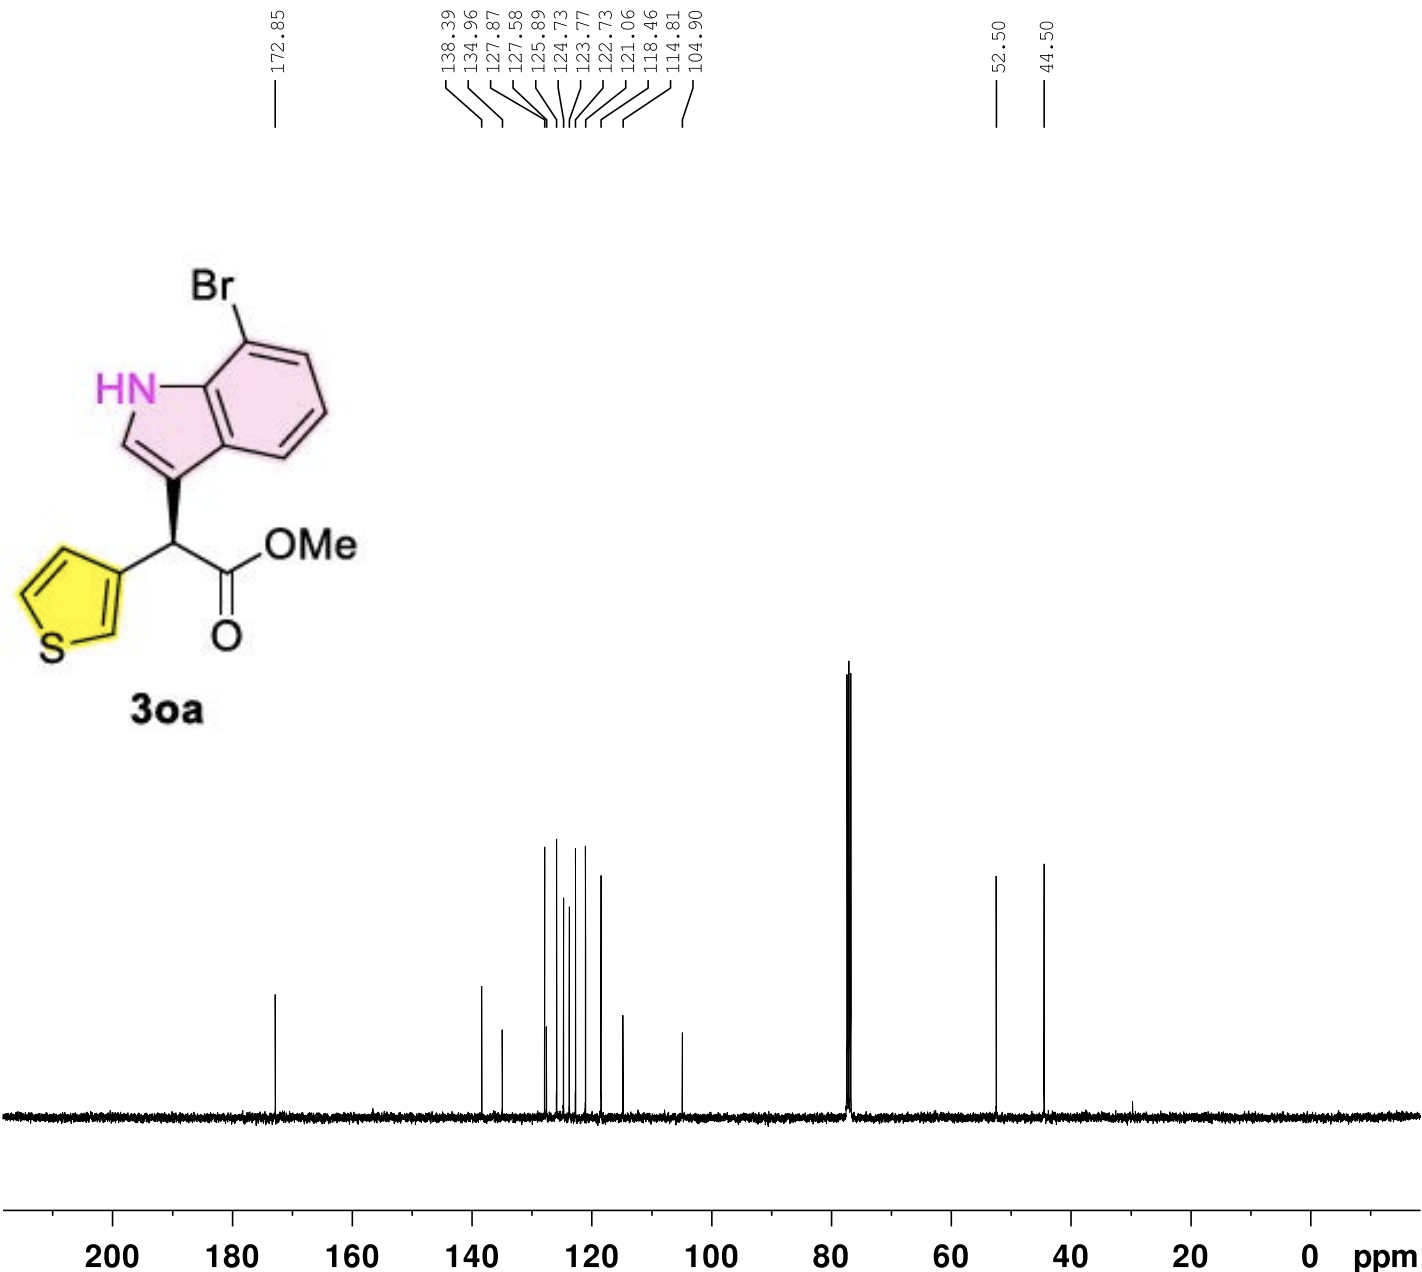

7.798  
7.568  
7.566  
7.551  
7.549  
7.531  
7.528  
7.504  
7.502  
7.484  
7.467  
7.450  
7.430  
7.342  
7.331  
7.323  
7.310  
7.039  
7.034  
6.998  
6.980  
6.977  
6.961  
6.955  
6.942  
6.374

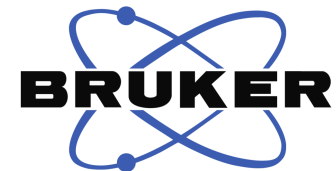

Current Data Parameters  
 NAME NMR-YX-5-p96  
 EXPNO 1  
 PROCNO 1

F2 - Acquisition Parameters

Date\_ 20231107  
 Time 10.56 h  
 INSTRUM Avance  
 PROBHD z116098\_0833 (  
 PULPROG zg30  
 TD 65536  
 SOLVENT CDCl3  
 NS 16  
 DS 2  
 SWH 8196.722 Hz  
 FIDRES 0.250144 Hz  
 AQ 3.9976959 sec  
 RG 58.8235  
 DW 61.000 usec  
 DE 13.54 usec  
 TE 294.0 K  
 D1 1.00000000 sec  
 TD0 1  
 SFO1 400.1324708 MHz  
 NUC1 1H  
 P0 3.33 usec  
 P1 10.00 usec  
 PLW1 20.73200035 W

F2 - Processing parameters

SI 65536  
 SF 400.1300283 MHz  
 WDW EM  
 SSB 0  
 LB 0.30 Hz  
 GB 0  
 PC 1.00

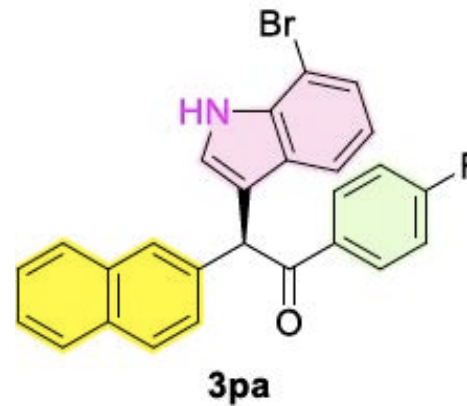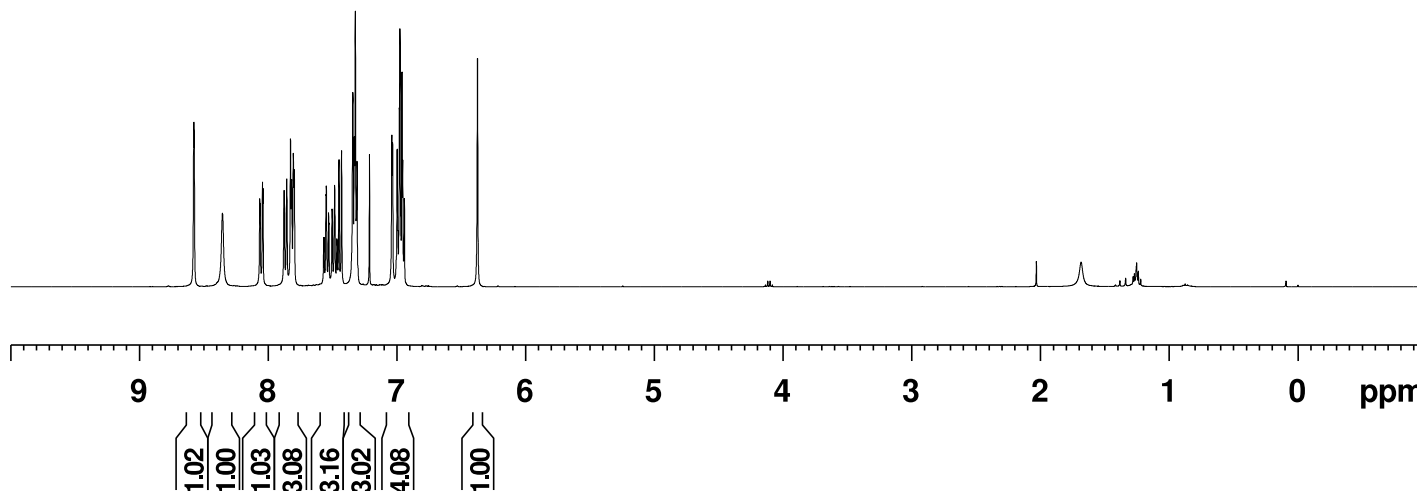



Current Data Parameters  
NAME NMR-YX-5-p96  
EXPNO 2  
PROCNO 1

F2 - Acquisition Parameters

Date\_ 20231107  
Time 11.16 h  
INSTRUM Avance  
PROBHD z116098\_0833 (  
PULPROG zgpg30  
TD 65536  
SOLVENT CDC13  
NS 100  
DS 4  
SWH 23809.523 Hz  
FIDRES 0.726609 Hz  
AQ 1.3762560 sec  
RG 46.0295  
DW 21.000 usec  
DE 6.50 usec  
TE 293.9 K  
D1 2.00000000 sec  
D11 0.03000000 sec  
TD0 1  
SFO1 100.6228298 MHz  
NUC1 13C  
P0 3.33 usec  
P1 10.00 usec  
PLW1 87.89900208 W  
SFO2 400.1316005 MHz  
NUC2 1H  
CPDPRG[2] waltz65  
PCPD2 90.00 usec  
PLW2 20.73200035 W  
PLW12 0.25595000 W  
PLW13 0.12874000 W

F2 - Processing parameters

SI 32768  
SF 100.6127685 MHz  
WDW EM  
SSB 0  
LB 1.00 Hz  
GB 0  
PC 1.40

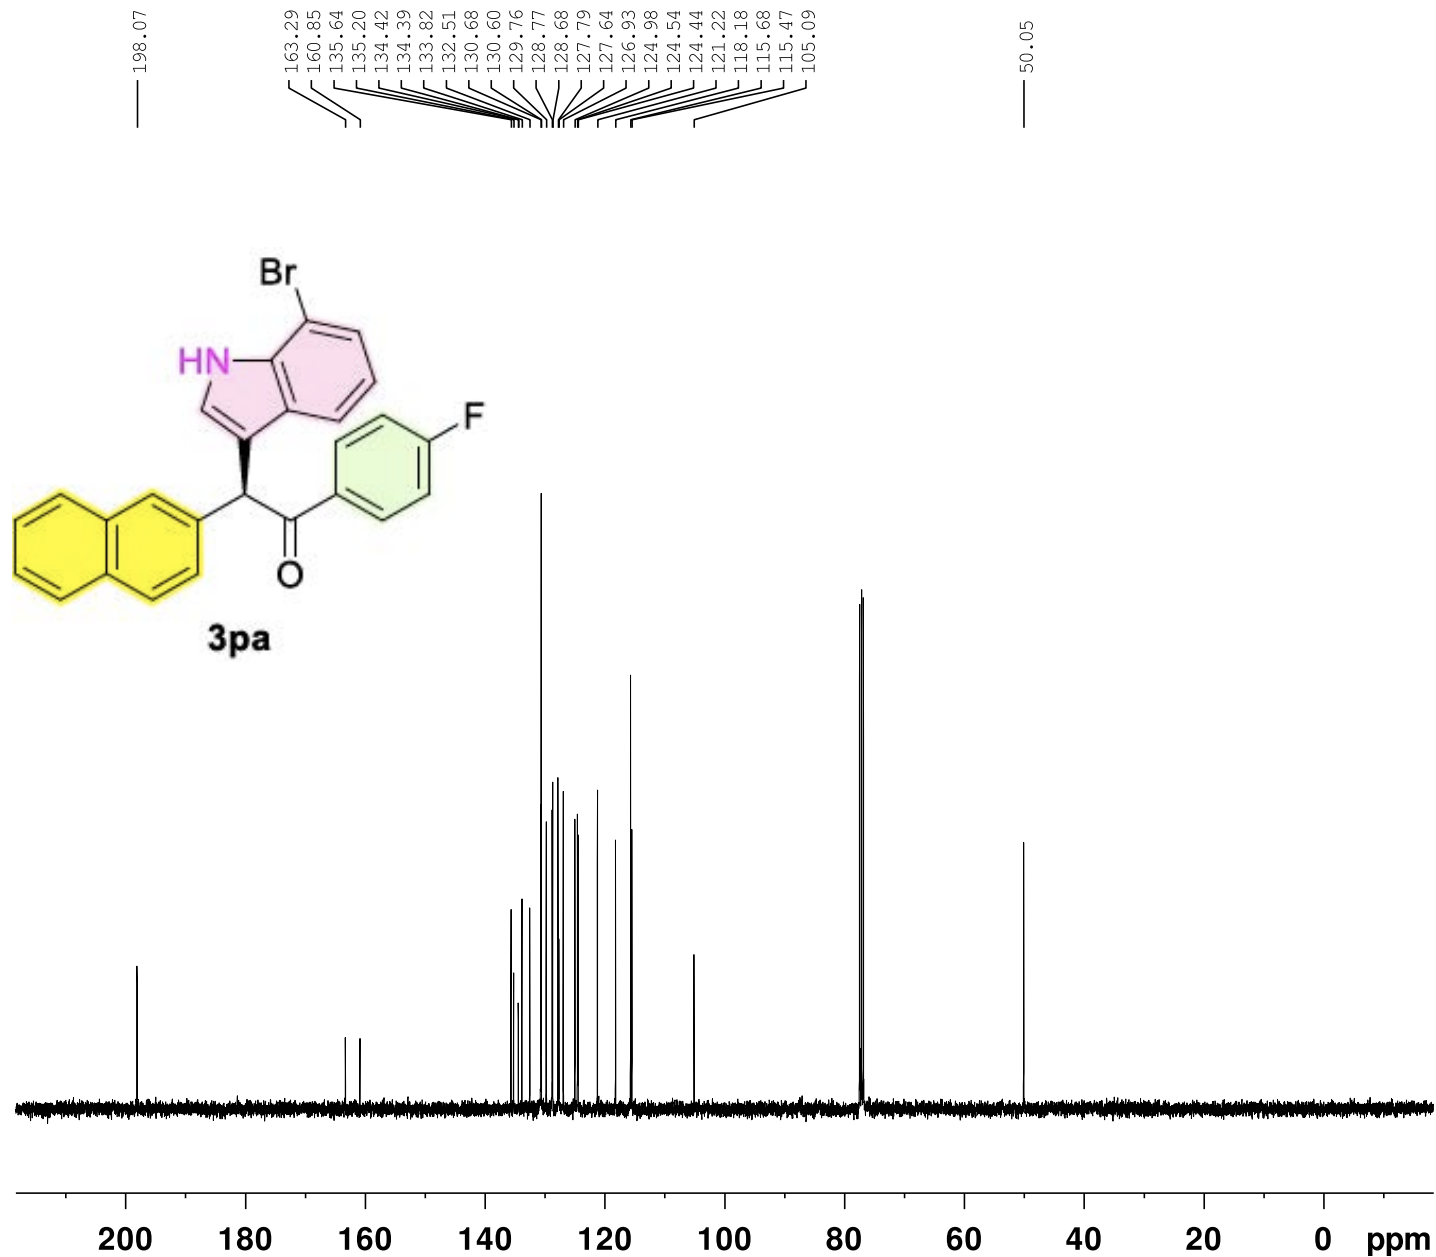



Current Data Parameters  
NAME FNMR-YX-5-p96  
EXPNO 1  
PROCNO 1

F2 - Acquisition Parameters  
Date\_ 20231109  
Time 16.50 h  
INSTRUM Avance  
PROBHD Z116098\_0833 (  
PULPROG zgig  
TD 131072  
SOLVENT CDCl3  
NS 16  
DS 4  
SWH 90909.094 Hz  
FIDRES 1.387163 Hz  
AQ 0.7208960 sec  
RG 101  
DW 5.500 usec  
DE 6.50 usec  
TE 293.5 K  
D1 1.00000000 sec  
D11 0.03000000 sec  
TD0 1  
SFO1 376.4607164 MHz  
NUC1 19F  
P1 18.00 usec  
PLW1 16.73100090 W  
SFO2 400.1316005 MHz  
NUC2 1H  
CPDPRG[2] waltz16  
PCPD2 90.00 usec  
PLW2 20.73200035 W  
PLW12 0.25595000 W

F2 - Processing parameters  
SI 65536  
SF 376.4983662 MHz  
WDW EM  
SSB 0  
LB 0.30 Hz  
GB 0  
PC 1.00

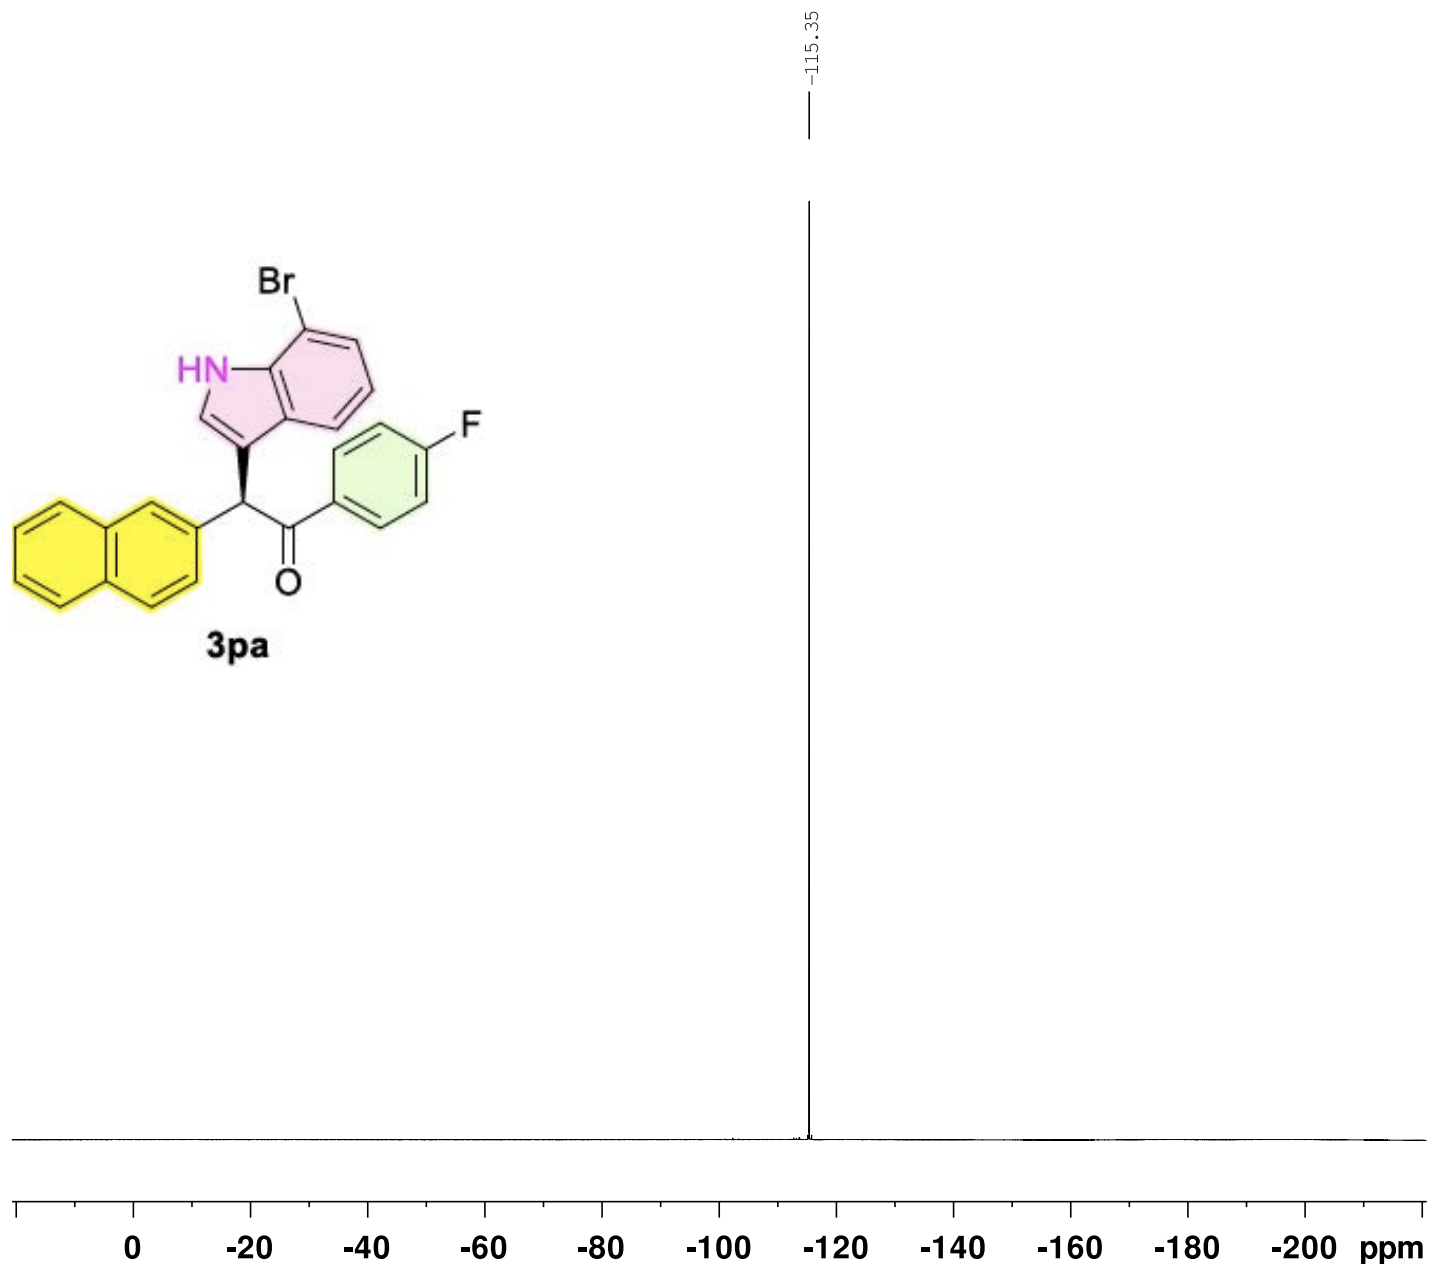



Current Data Parameters  
NAME HNMR-YX-5-p59  
EXPNO 2000  
PROCNO 1

F2 - Acquisition Parameters  
Date\_ 20230804  
Time 15.47  
INSTRUM spect  
PROBHD 5 mm PABBO BB-  
PULPROG zg30  
TD 65536  
SOLVENT CDCl3  
NS 16  
DS 2  
SWH 6009.615 Hz  
FIDRES 0.091699 Hz  
AQ 5.4525952 sec  
RG 181  
DW 83.200 usec  
DE 6.50 usec  
TE 297.6 K  
D1 1.00000000 sec  
TD0 1

==== CHANNEL f1 =====  
SFO1 300.1318534 MHz  
NUC1 1H  
P1 10.00 usec  
PLW1 14.00000000 W

F2 - Processing parameters  
SI 65536  
SF 300.1300312 MHz  
WDW EM  
SSB 0  
LB 0.30 Hz  
GB 0  
PC 1.00

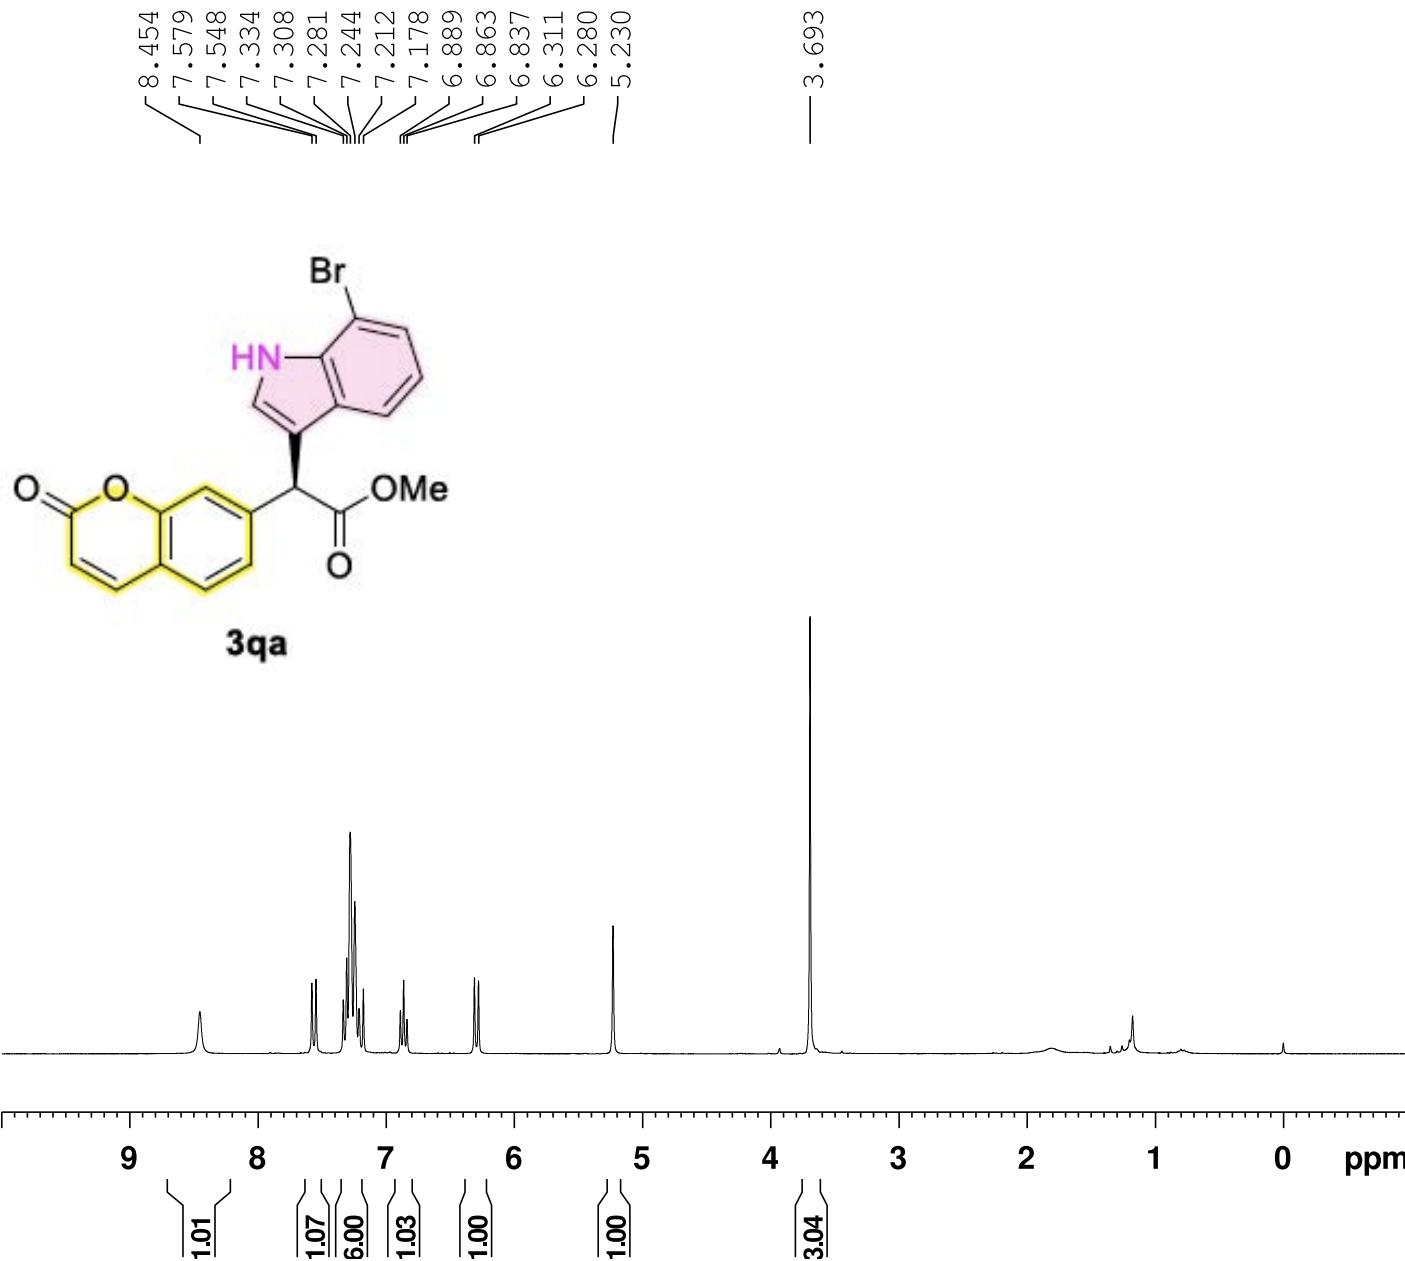



Current Data Parameters  
NAME CNMR-YX-5-p59  
EXPNO 2007  
PROCNO 1

F2 - Acquisition Parameters

Date\_ 20230804  
Time 16.34  
INSTRUM spect  
PROBHD 5 mm PABBO BB-  
PULPROG zgpg30  
TD 65536  
SOLVENT CDCl3  
NS 100  
DS 4  
SWH 18115.941 Hz  
FIDRES 0.276427 Hz  
AQ 1.8087935 sec  
RG 203  
DW 27.600 usec  
DE 6.50 usec  
TE 298.4 K  
D1 2.00000000 sec  
D11 0.03000000 sec  
TD0 1

==== CHANNEL f1 =====  
SFO1 75.4760500 MHz  
NUC1 13C  
P1 9.50 usec  
PLW1 34.20000076 W

==== CHANNEL f2 =====  
SFO2 300.1312005 MHz  
NUC2 1H  
CPDPRG[2] waltz16  
PCPD2 90.00 usec  
PLW2 14.00000000 W  
PLW12 0.17284000 W  
PLW13 0.14000000 W

F2 - Processing parameters

SI 32768  
SF 75.4677485 MHz  
WDW EM  
SSB 0  
LB 1.00 Hz  
GB 0  
PC 1.40

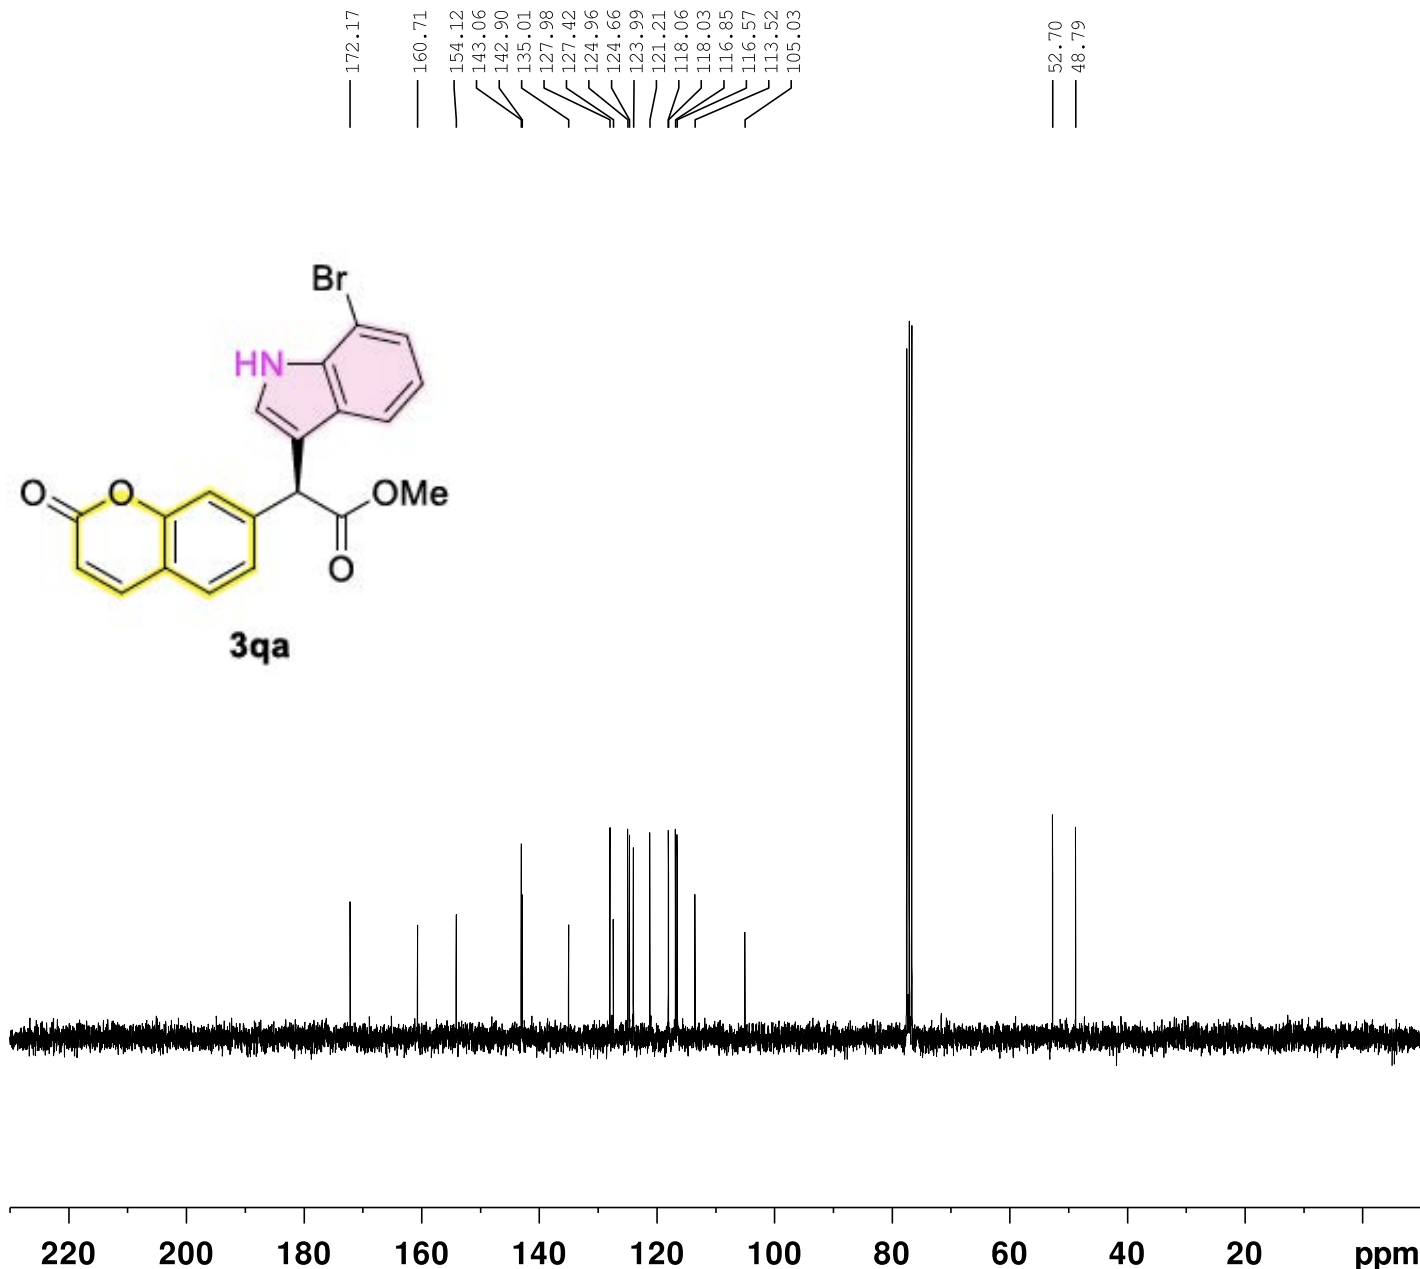



Current Data Parameters  
NAME HNMR-YX-6-p18  
EXPNO 149  
PROCNO 1

F2 - Acquisition Parameters

Date\_ 20231008  
Time 15.10  
INSTRUM spect  
PROBHD 5 mm PADUL 13C  
PULPROG zg30  
TD 65536  
SOLVENT CDCl3  
NS 4  
DS 2  
SWH 8223.685 Hz  
FIDRES 0.125483 Hz  
AQ 3.9845889 sec  
RG 61.19  
DW 60.800 usec  
DE 6.50 usec  
TE 294.0 K  
D1 1.00000000 sec  
TD0 1

==== CHANNEL f1 =====

NUC1 1H  
P1 9.90 usec  
PLW1 23.00000000 W  
SFO1 400.1924713 MHz

F2 - Processing parameters

SI 65536  
SF 400.1900197 MHz  
WDW EM  
SSB 0  
LB 0.30 Hz  
GB 0  
PC 1.00

8.394  
7.423  
7.403  
7.324  
7.305  
7.296  
7.291  
7.245  
7.232  
7.212  
7.182  
7.162  
7.112  
6.961  
6.942  
6.923  
5.166  
3.739  
2.867  
2.852  
2.843  
2.504  
2.478  
2.457  
2.360  
2.153  
2.130  
2.035  
2.000  
1.963  
1.953  
1.929  
1.601  
1.572  
1.545  
1.518  
1.505  
1.486  
1.461  
1.420  
0.882

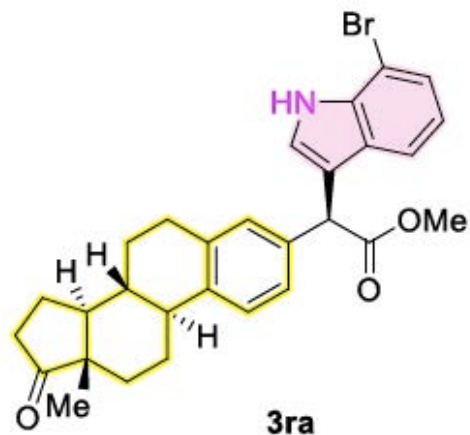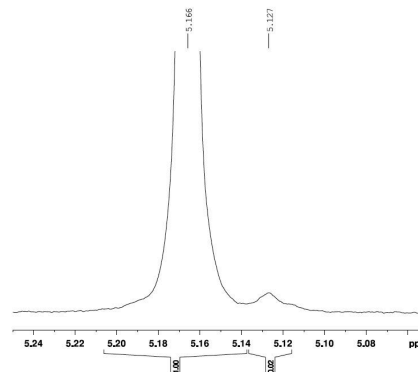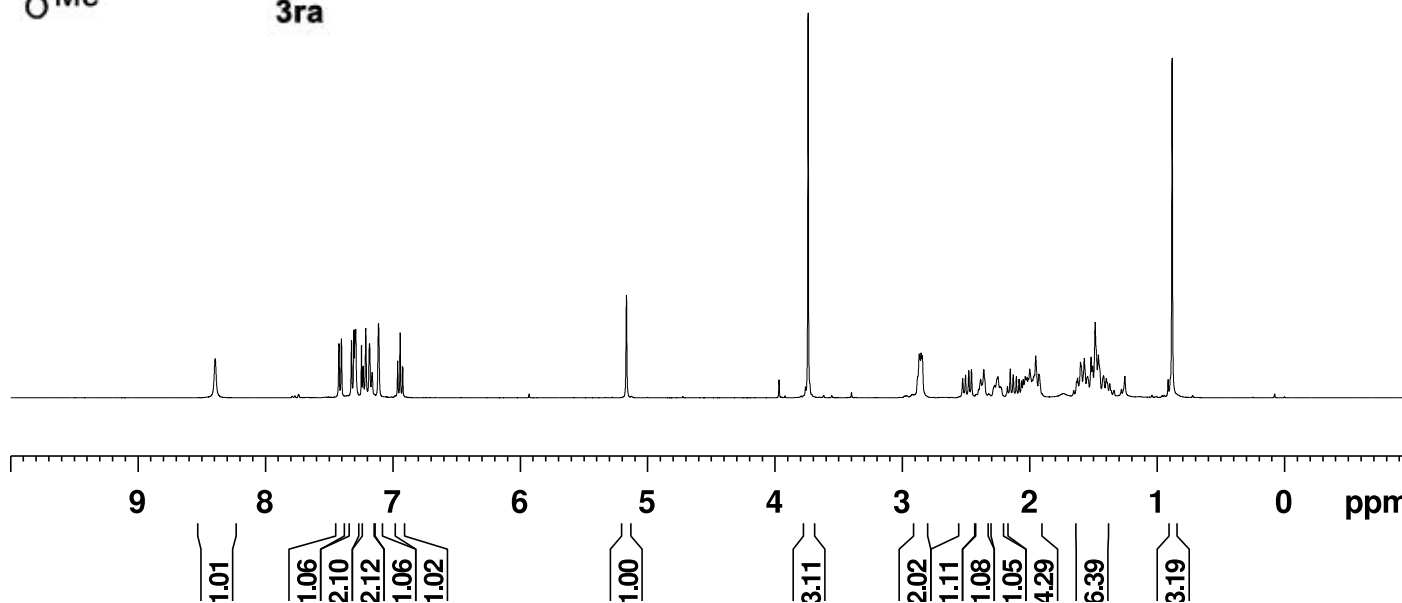



Current Data Parameters  
NAME CNMR-YX-6-p18  
EXPNO 160  
PROCNO 1

F2 - Acquisition Parameters

Date\_ 20231010  
Time 22.16  
INSTRUM spect  
PROBHD 5 mm PADUL 13C  
PULPROG zgpg30  
TD 65536  
SOLVENT CDCl3  
NS 1024  
DS 4  
SWH 24038.461 Hz  
FIDRES 0.366798 Hz  
AQ 1.3631488 sec  
RG 37.77  
DW 20.800 usec  
DE 6.50 usec  
TE 292.5 K  
D1 2.00000000 sec  
D11 0.03000000 sec  
TD0 1

==== CHANNEL f1 =====  
NUC1 13C  
P1 9.80 usec  
PLW1 47.4000153 W  
SFO1 100.6389251 MHz

==== CHANNEL f2 =====  
CPDPRG[2] waltz16  
NUC2 1H  
PCPD2 90.00 usec  
PLW2 23.0000000 W  
PLW12 0.30712000 W  
PLW13 0.24877000 W  
SFO2 400.1916008 MHz

F2 - Processing parameters  
SI 32768  
SF 100.6278560 MHz  
WDW EM  
SSB 0  
LB 1.00 Hz  
GB 0  
PC 1.40

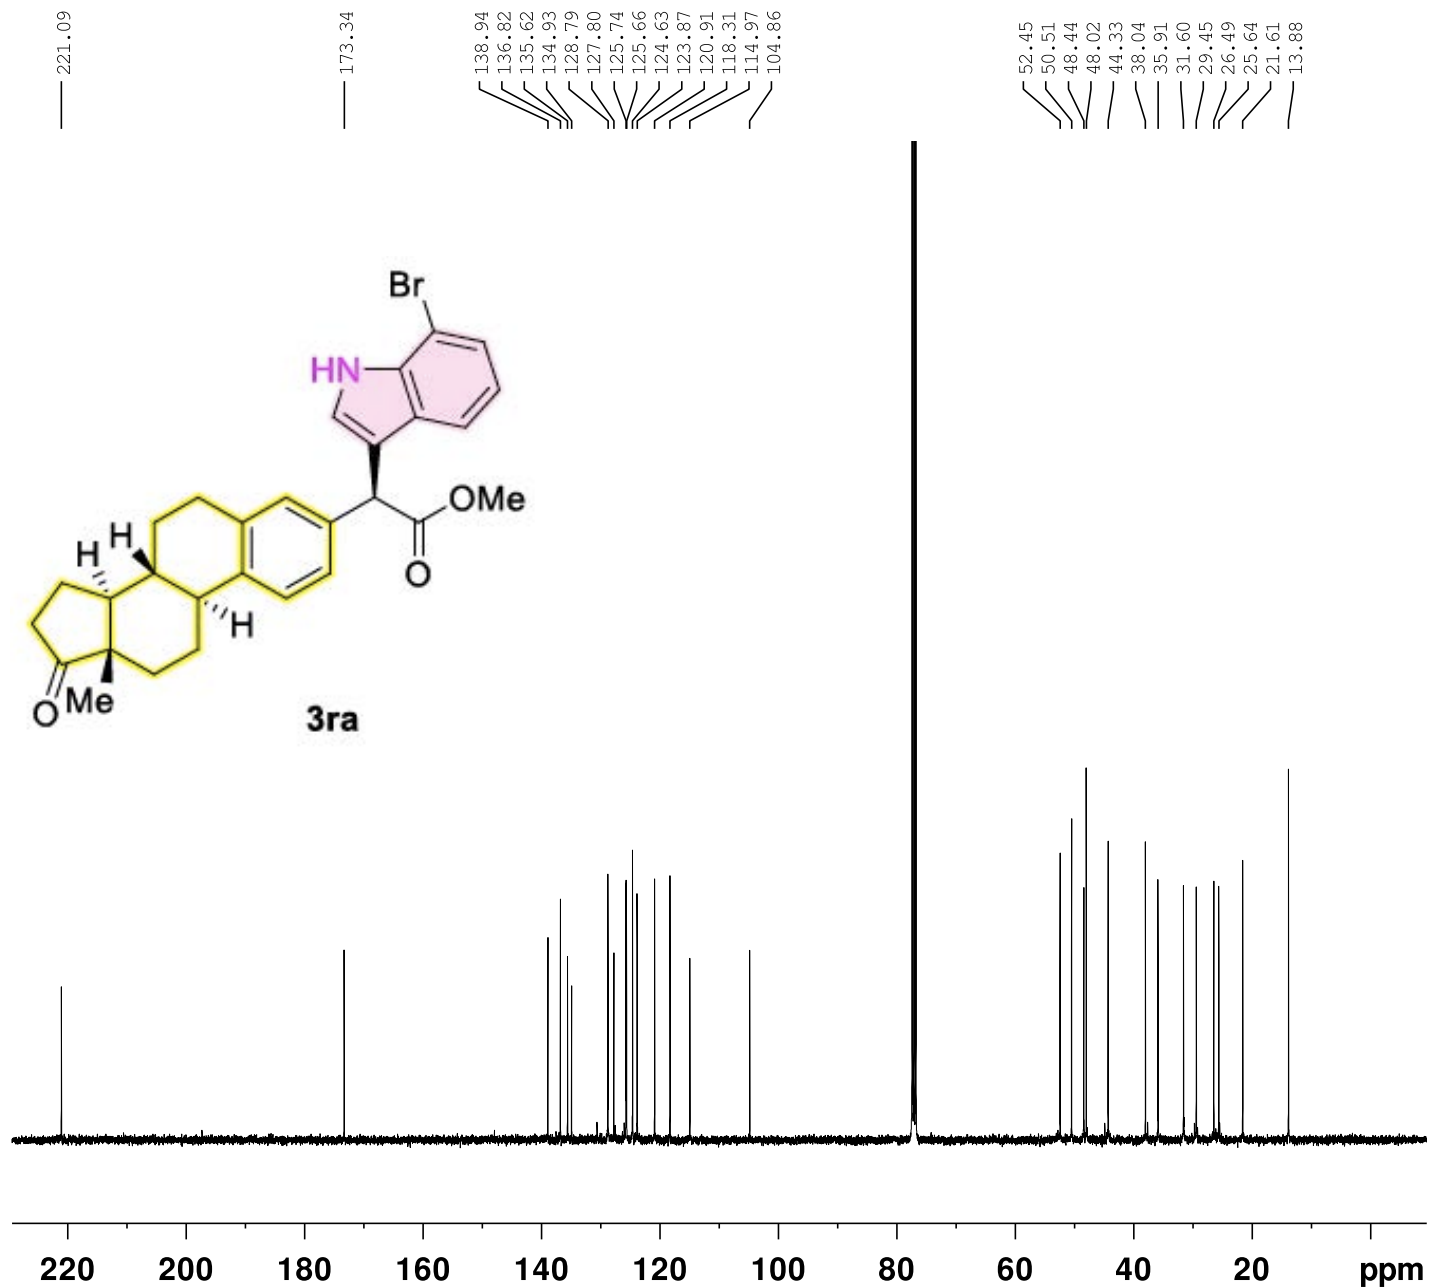





Current Data Parameters  
NAME HNMR-YX-5-p52  
EXPNO 1  
PROCNO 1

F2 - Acquisition Parameters  
Date\_ 20230729  
Time 9.49 h  
INSTRUM Avance  
PROBHD Z116098\_0833 (  
PULPROG zg30  
TD 65536  
SOLVENT CDCl3  
NS 16  
DS 2  
SWH 8196.722 Hz  
FIDRES 0.250144 Hz  
AQ 3.9976959 sec  
RG 54.0541  
DW 61.000 usec  
DE 13.54 usec  
TE 294.6 K  
D1 1.00000000 sec  
TD0 1  
SFO1 400.1324708 MHz  
NUC1 1H  
P0 3.33 usec  
P1 10.00 usec  
PLW1 20.73200035 W

F2 - Processing parameters  
SI 65536  
SF 400.1300626 MHz  
WDW EM  
SSB 0  
LB 0.30 Hz  
GB 0  
PC 1.00

7.364  
7.266  
7.248  
7.237  
7.234  
7.227  
7.221  
7.206  
7.199  
7.194  
7.191  
7.185  
7.183  
7.178  
7.127  
7.107  
7.089  
7.070  
6.367  
6.360  
6.359  
6.352  
6.012  
6.005  
5.999  
5.009  
3.669

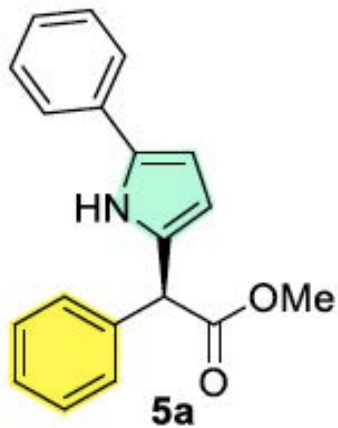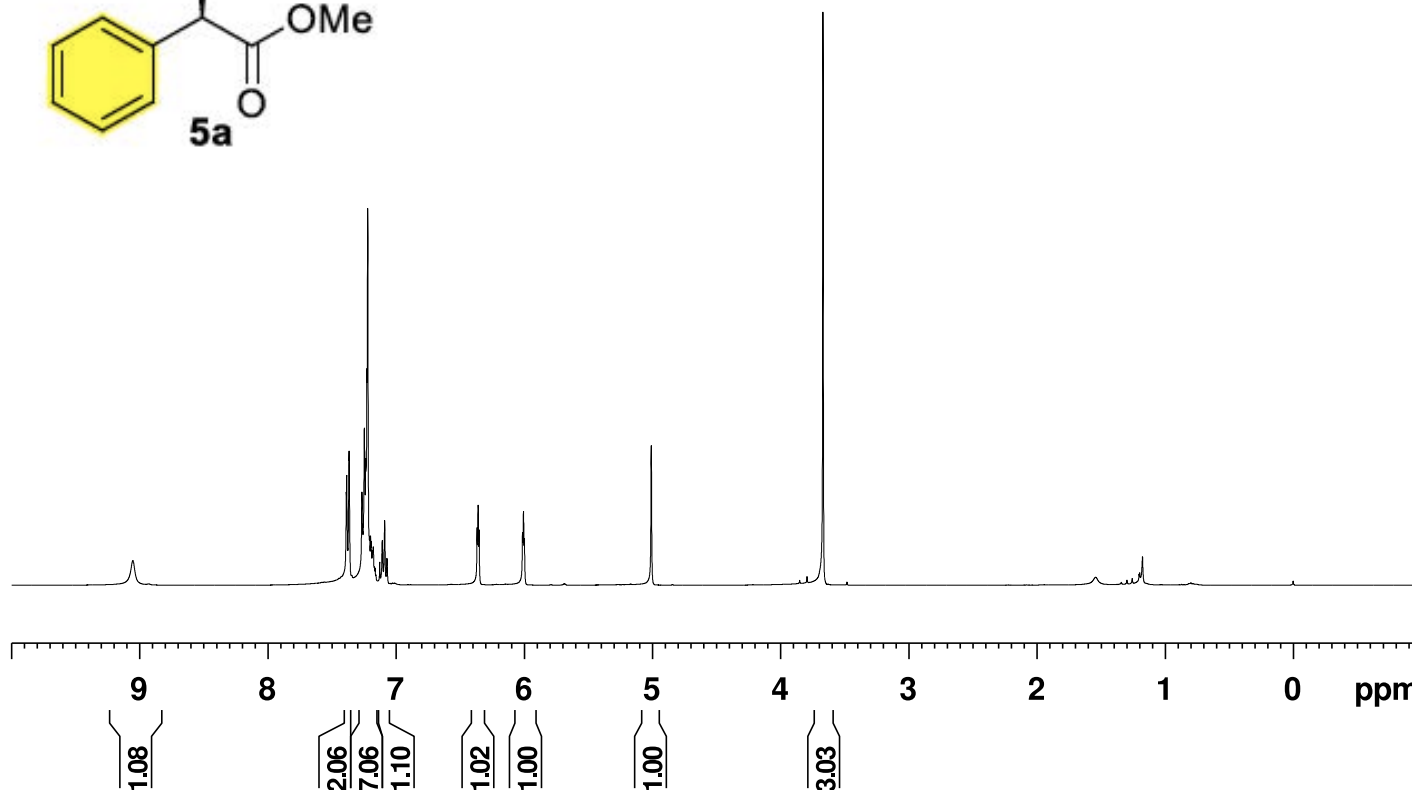



Current Data Parameters  
NAME CNMR-YX-5-p52  
EXPNO 2  
PROCNO 1

F2 - Acquisition Parameters  
Date\_ 20230729  
Time 12.22 h  
INSTRUM Avance  
PROBHD Z116098\_0833 (  
PULPROG zgpg30  
TD 65536  
SOLVENT CDC13  
NS 200  
DS 4  
SWH 23809.523 Hz  
FIDRES 0.726609 Hz  
AQ 1.3762560 sec  
RG 44.7144  
DW 21.000 usec  
DE 6.50 usec  
TE 294.9 K  
D1 2.00000000 sec  
D11 0.03000000 sec  
TD0 1  
SFO1 100.6228298 MHz  
NUC1 13C  
P0 3.33 usec  
P1 10.00 usec  
PLW1 87.89900208 W  
SFO2 400.1316005 MHz  
NUC2 1H  
CPDPRG[2] waltz65  
PCPD2 90.00 usec  
PLW2 20.73200035 W  
PLW12 0.25595000 W  
PLW13 0.12874000 W

F2 - Processing parameters  
SI 32768  
SF 100.6127685 MHz  
WDW EM  
SSB 0  
LB 1.00 Hz  
GB 0  
PC 1.40

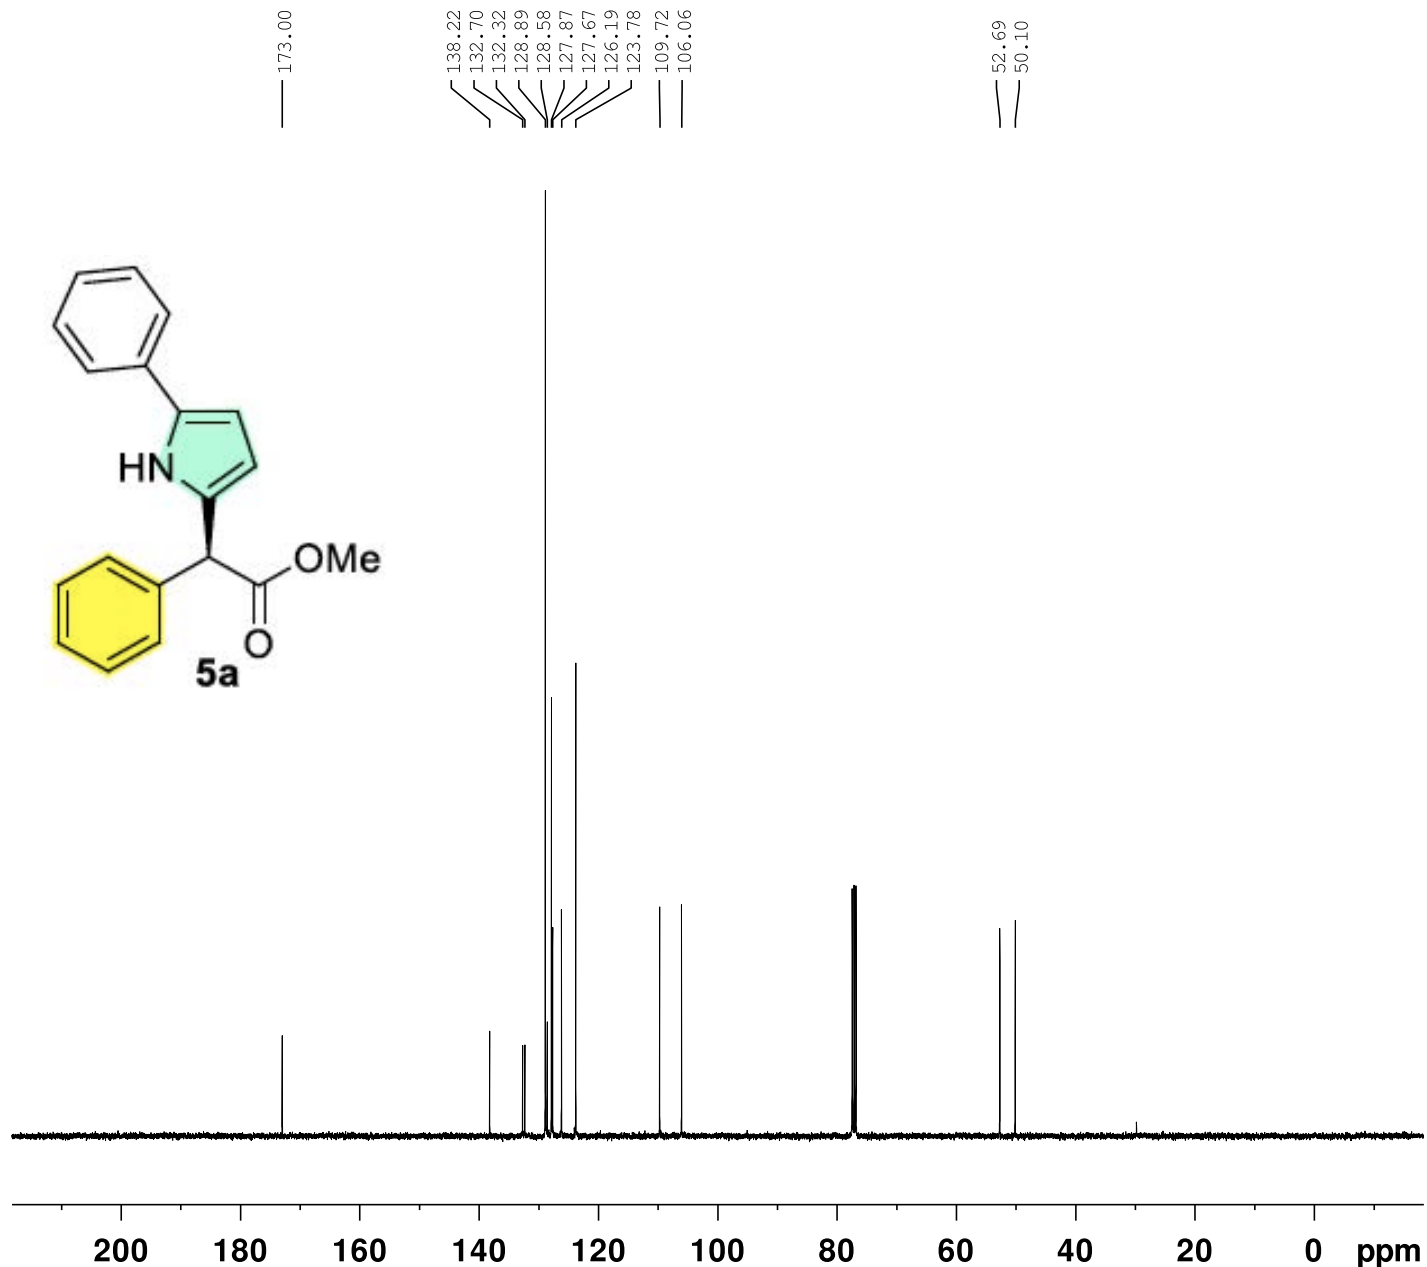



Current Data Parameters  
NAME HNMR-YX-5-p80  
EXPNO 2126  
PROCNO 1

F2 - Acquisition Parameters  
Date\_ 20230908  
Time 14.37  
INSTRUM spect  
PROBHD 5 mm PABBO BB-  
PULPROG zg30  
TD 65536  
SOLVENT CDCl3  
NS 16  
DS 2  
SWH 6009.615 Hz  
FIDRES 0.091699 Hz  
AQ 5.4525952 sec  
RG 101  
DW 83.200 usec  
DE 6.50 usec  
TE 295.9 K  
D1 1.00000000 sec  
TD0 1

==== CHANNEL f1 =====  
SFO1 300.1318534 MHz  
NUC1 1H  
P1 10.00 usec  
PLW1 14.00000000 W

F2 - Processing parameters  
SI 65536  
SF 300.1300220 MHz  
WDW EM  
SSB 0  
LB 0.30 Hz  
GB 0  
PC 1.00

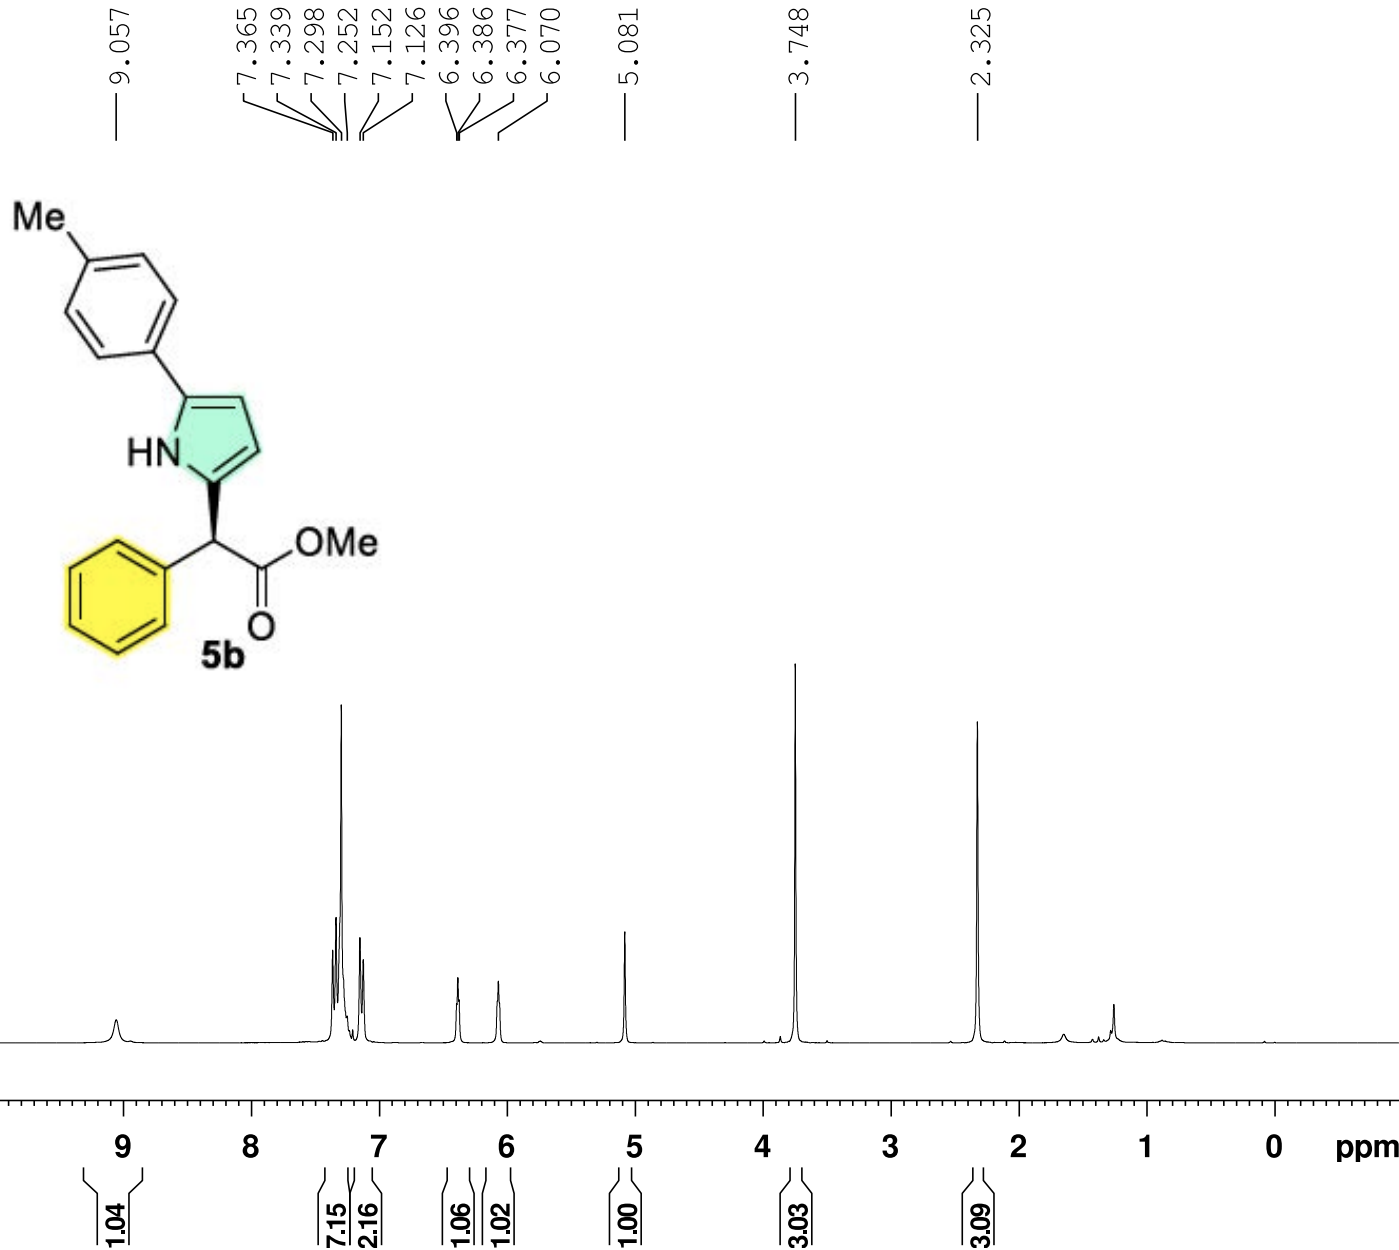



Current Data Parameters  
NAME CNMR-YX-5-p80  
EXPNO 2130  
PROCNO 1

F2 - Acquisition Parameters

Date\_ 20230908  
Time 15.23  
INSTRUM spect  
PROBHD 5 mm PABBO BB-  
PULPROG zgpg30  
TD 65536  
SOLVENT CDC13  
NS 70  
DS 4  
SWH 18028.846 Hz  
FIDRES 0.275098 Hz  
AQ 1.8175317 sec  
RG 203  
DW 27.733 usec  
DE 6.50 usec  
TE 296.5 K  
D1 2.00000000 sec  
D11 0.03000000 sec  
TD0 1

==== CHANNEL f1 =====

SFO1 75.4752949 MHz  
NUC1 13C  
P1 9.50 usec  
PLW1 34.20000076 W

==== CHANNEL f2 =====

SFO2 300.1312005 MHz  
NUC2 1H  
CPDPRG[2] waltz16  
PCPD2 90.00 usec  
PLW2 14.00000000 W  
PLW12 0.17284000 W  
PLW13 0.14000000 W

F2 - Processing parameters

SI 32768  
SF 75.4677485 MHz  
WDW EM  
SSB 0  
LB 1.00 Hz  
GB 0  
PC 1.40

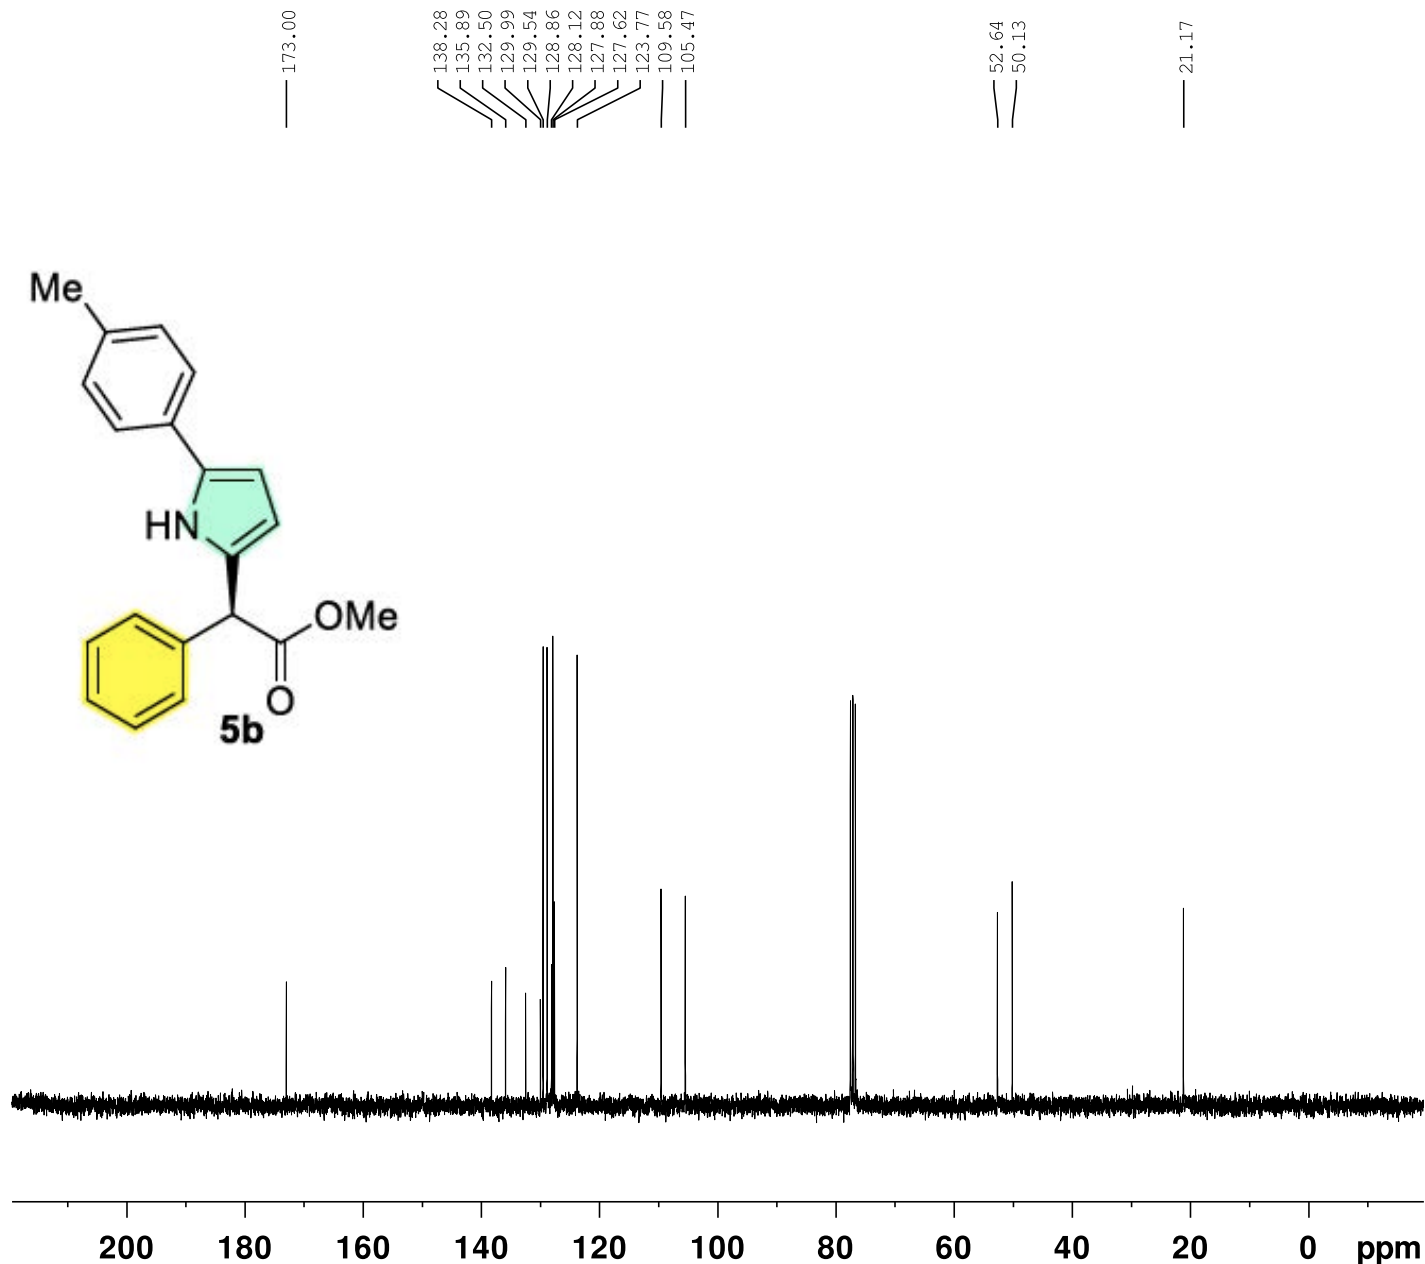



Current Data Parameters  
NAME NMR-YX-6-p31  
EXPNO 1  
PROCNO 1

F2 - Acquisition Parameters  
Date\_ 20231107  
Time 10.44 h  
INSTRUM Avance  
PROBHD Z116098\_0833 (  
PULPROG zg30  
TD 65536  
SOLVENT CDCl3  
NS 16  
DS 2  
SWH 8196.722 Hz  
FIDRES 0.250144 Hz  
AQ 3.9976959 sec  
RG 50  
DW 61.000 usec  
DE 13.54 usec  
TE 294.0 K  
D1 1.00000000 sec  
TD0 1  
SFO1 400.1324708 MHz  
NUC1 1H  
P0 3.33 usec  
P1 10.00 usec  
PLW1 20.73200035 W

F2 - Processing parameters  
SI 65536  
SF 400.1300352 MHz  
WDW EM  
SSB 0  
LB 0.30 Hz  
GB 0  
PC 1.00

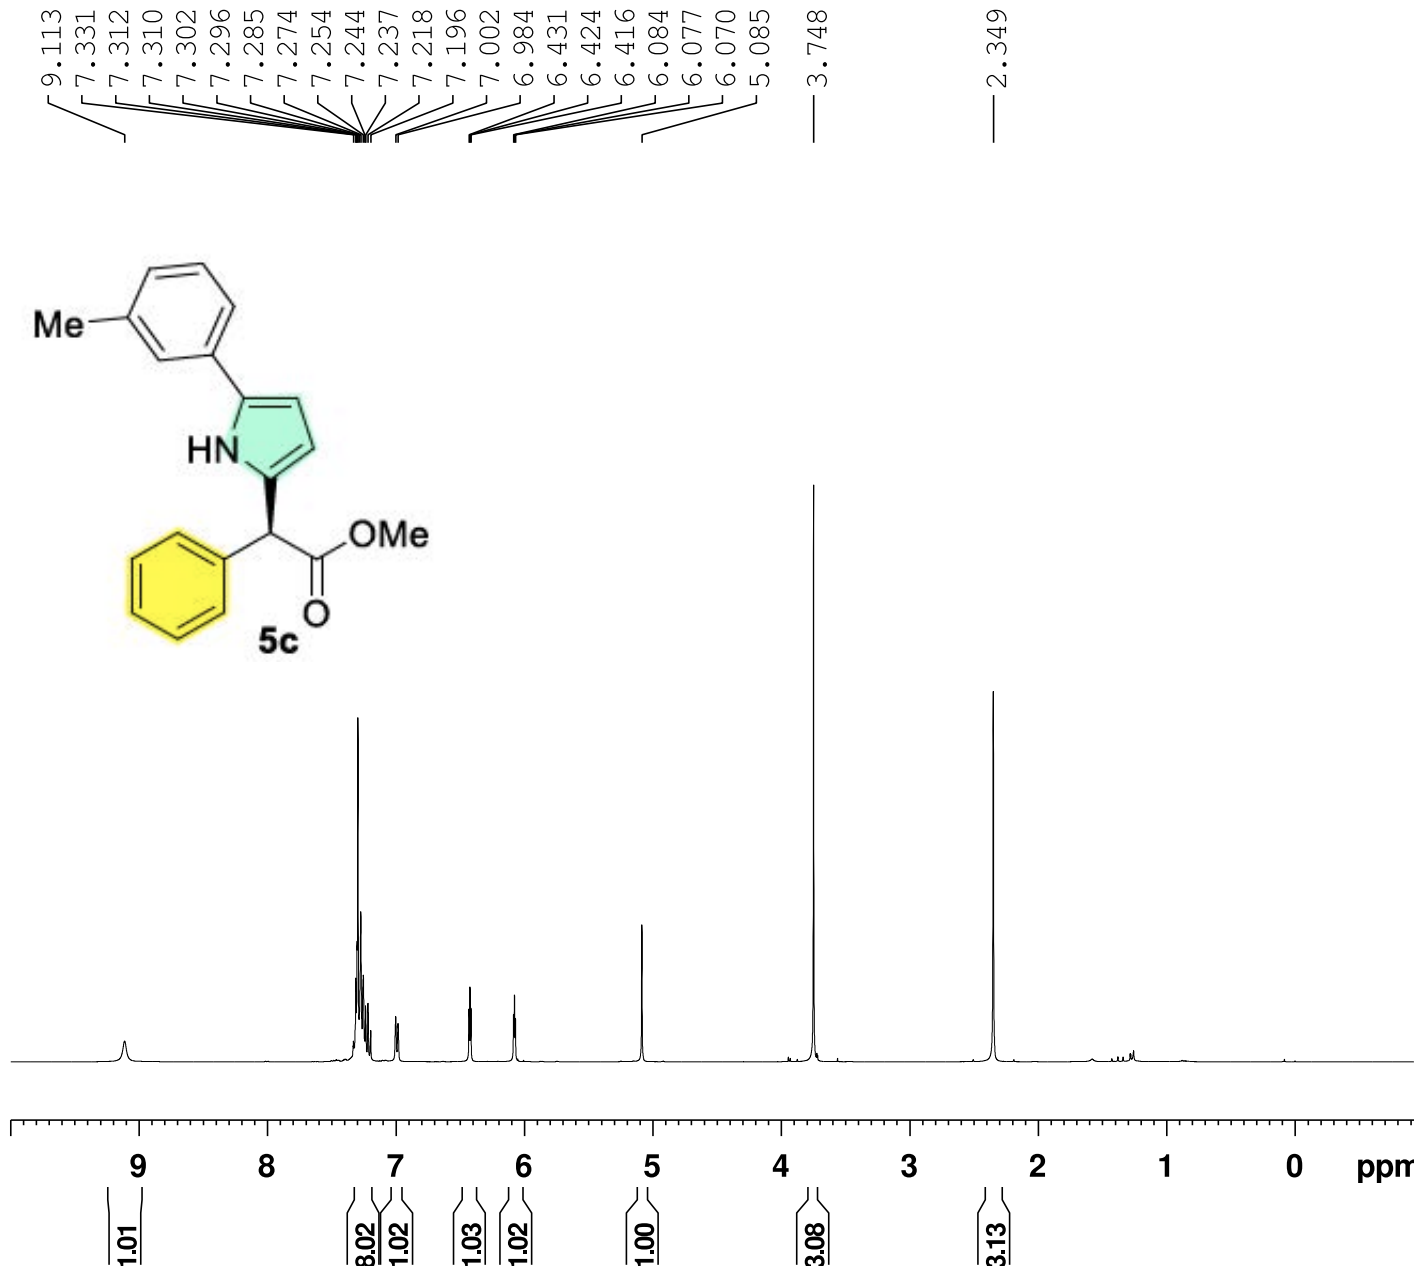



Current Data Parameters  
NAME NMR-YX-6-p31  
EXPNO 2  
PROCNO 1

F2 - Acquisition Parameters

Date\_ 20231107  
Time 10.51 h  
INSTRUM Avance  
PROBHD z116098\_0833 (  
PULPROG zgpg30  
TD 65536  
SOLVENT CDC13  
NS 100  
DS 4  
SWH 23809.523 Hz  
FIDRES 0.726609 Hz  
AQ 1.3762560 sec  
RG 43.5965  
DW 21.000 usec  
DE 6.50 usec  
TE 294.0 K  
D1 2.00000000 sec  
D11 0.03000000 sec  
TD0 1  
SFO1 100.6228298 MHz  
NUC1 13C  
P0 3.33 usec  
P1 10.00 usec  
PLW1 87.89900208 W  
SFO2 400.1316005 MHz  
NUC2 1H  
CPDPRG[2] waltz65  
PCPD2 90.00 usec  
PLW2 20.73200035 W  
PLW12 0.25595000 W  
PLW13 0.12874000 W

F2 - Processing parameters

SI 32768  
SF 100.6127685 MHz  
WDW EM  
SSB 0  
LB 1.00 Hz  
GB 0  
PC 1.40

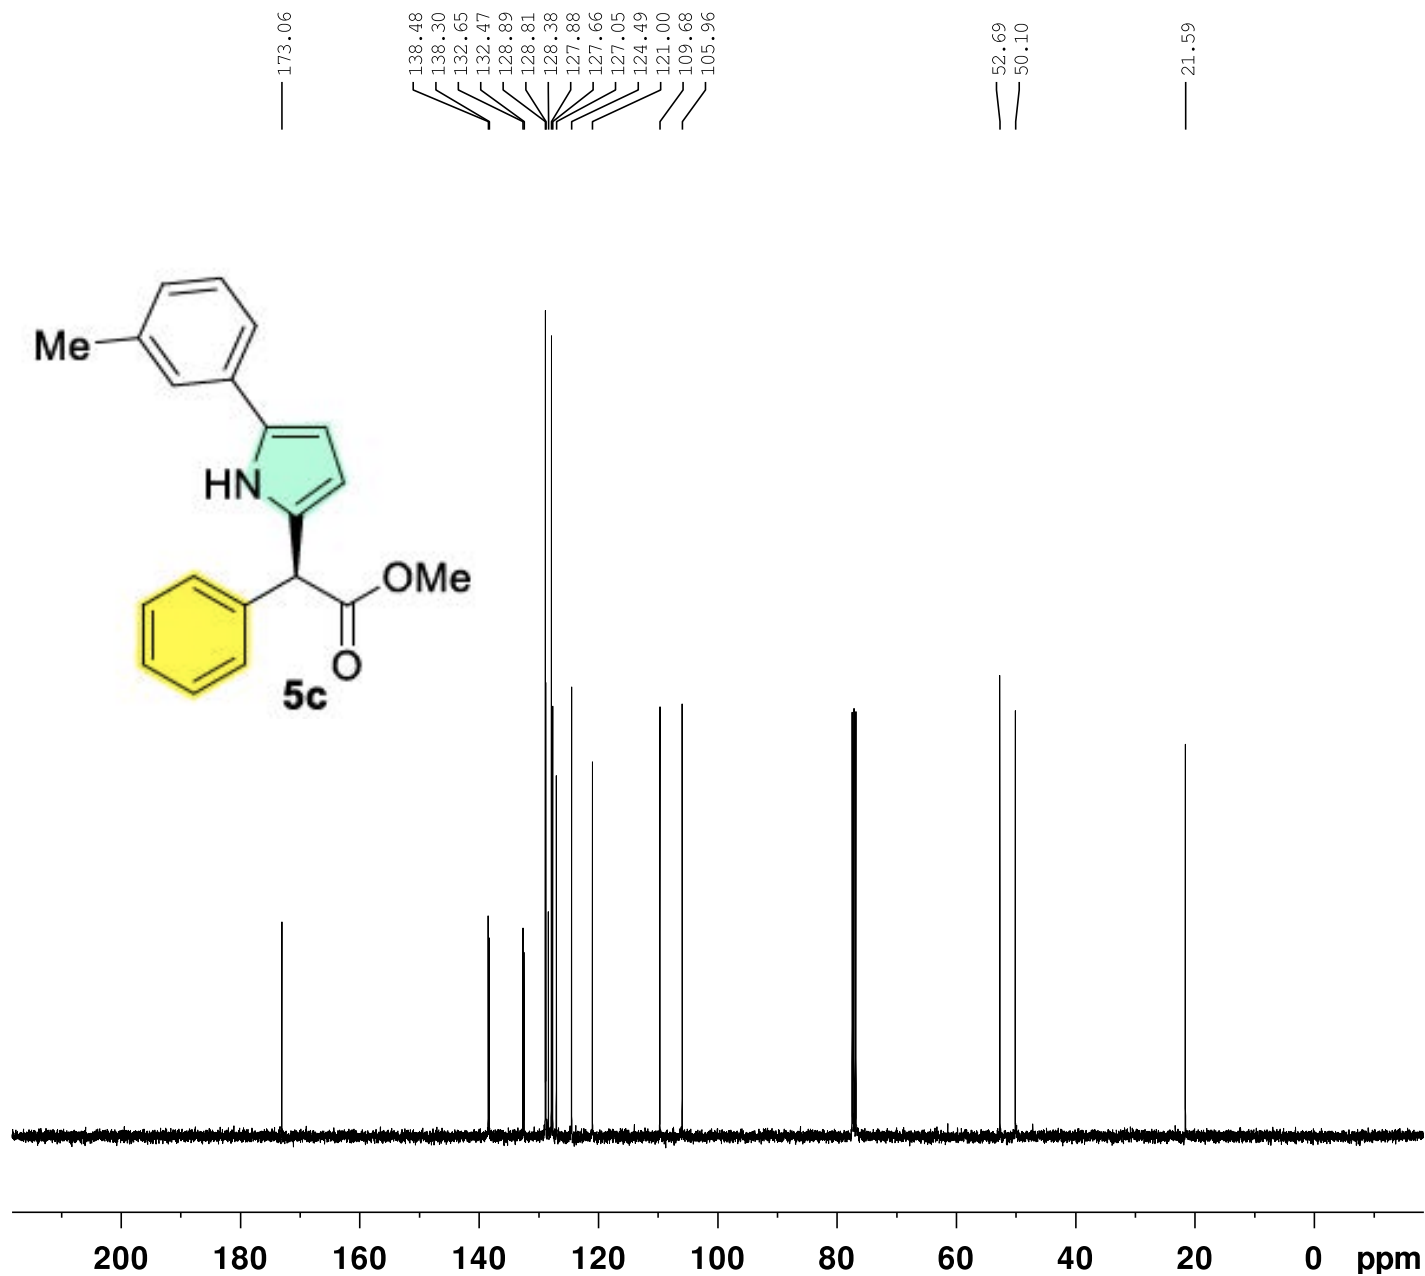



Current Data Parameters  
NAME HNMR-YX-5-p81  
EXPNO 2127  
PROCNO 1

F2 - Acquisition Parameters  
Date\_ 20230908  
Time 14.43  
INSTRUM spect  
PROBHD 5 mm PABBO BB-  
PULPROG zg30  
TD 65536  
SOLVENT CDCl3  
NS 16  
DS 2  
SWH 6009.615 Hz  
FIDRES 0.091699 Hz  
AQ 5.4525952 sec  
RG 101  
DW 83.200 usec  
DE 6.50 usec  
TE 295.8 K  
D1 1.00000000 sec  
TD0 1

==== CHANNEL f1 =====  
SFO1 300.1318534 MHz  
NUC1 1H  
P1 10.00 usec  
PLW1 14.00000000 W

F2 - Processing parameters  
SI 65536  
SF 300.1300199 MHz  
WDW EM  
SSB 0  
LB 0.30 Hz  
GB 0  
PC 1.00

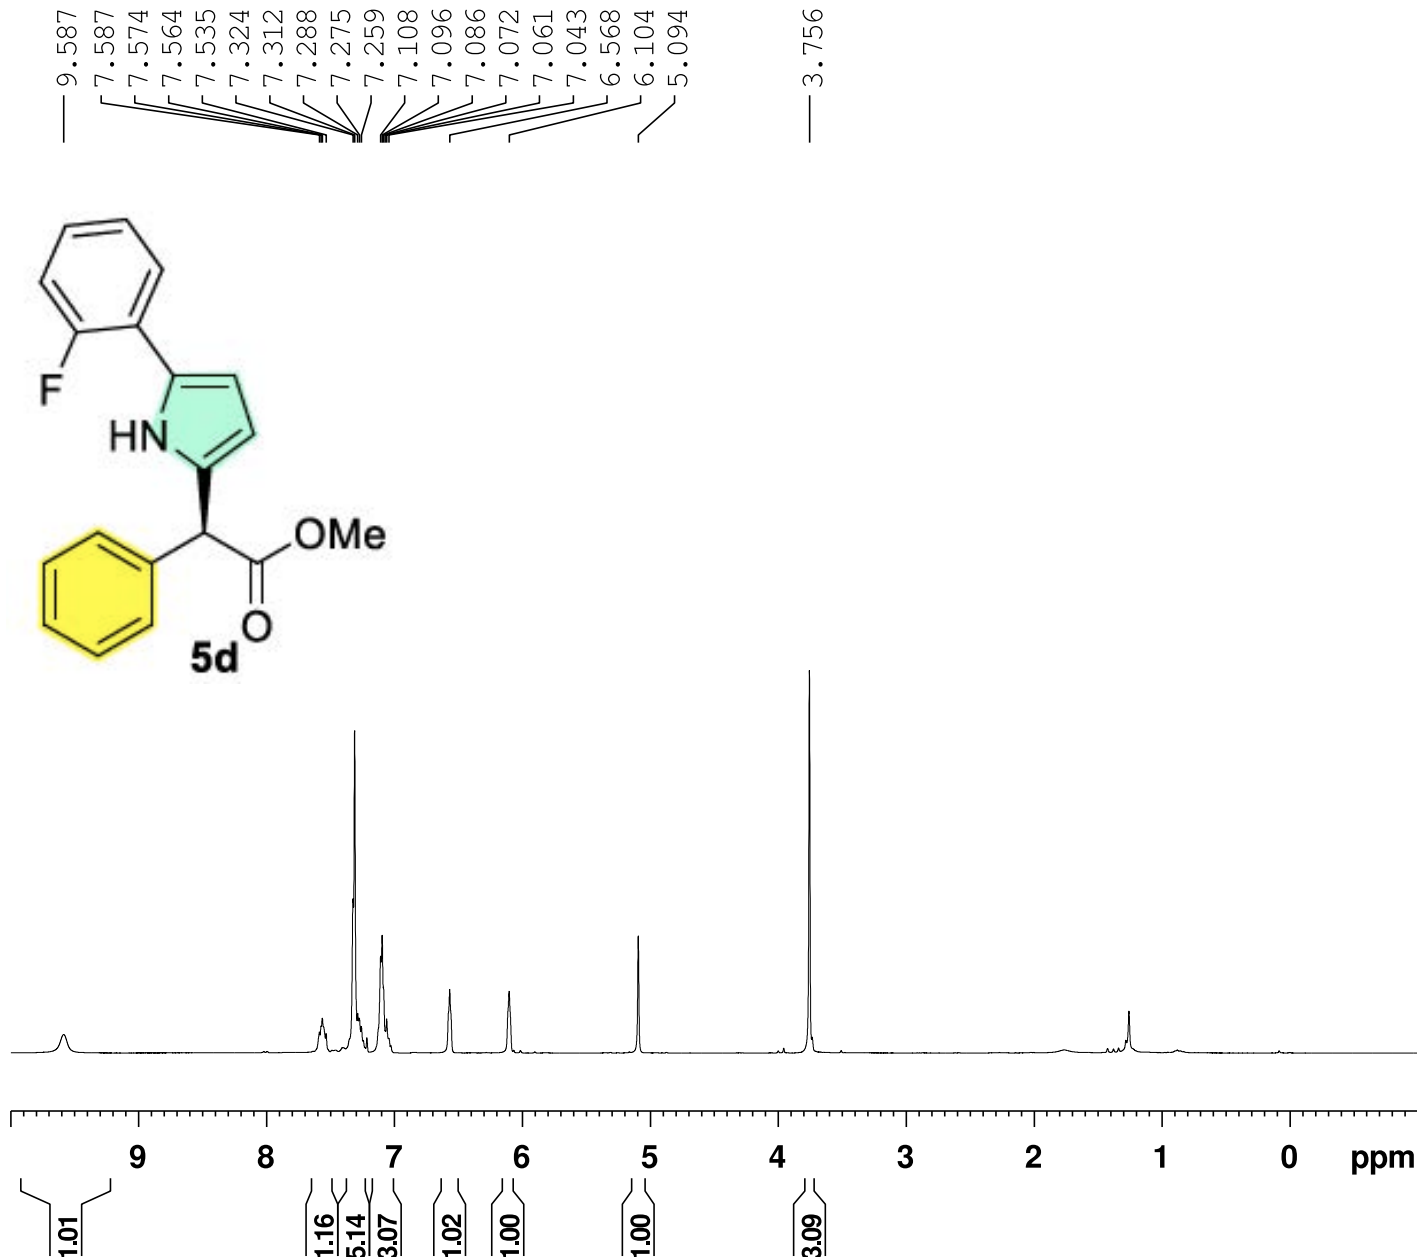



Current Data Parameters  
NAME CNMR-YX-5-p81  
EXPNO 2132  
PROCNO 1

F2 - Acquisition Parameters  
Date\_ 20230908  
Time 15.34  
INSTRUM spect  
PROBHD 5 mm PABBO BB-  
PULPROG zgpg30  
TD 65536  
SOLVENT CDCl3  
NS 70  
DS 4  
SWH 18028.846 Hz  
FIDRES 0.275098 Hz  
AQ 1.8175317 sec  
RG 203  
DW 27.733 usec  
DE 6.50 usec  
TE 296.5 K  
D1 2.00000000 sec  
D11 0.03000000 sec  
TD0 1

==== CHANNEL f1 =====  
SFO1 75.4752949 MHz  
NUC1 13C  
P1 9.50 usec  
PLW1 34.20000076 W

==== CHANNEL f2 =====  
SFO2 300.1312005 MHz  
NUC2 1H  
CPDPRG[2] waltz16  
PCPD2 90.00 usec  
PLW2 14.00000000 W  
PLW12 0.17284000 W  
PLW13 0.14000000 W

F2 - Processing parameters  
SI 32768  
SF 75.4677485 MHz  
WDW EM  
SSB 0  
LB 1.00 Hz  
GB 0  
PC 1.40

172.62  
160.13  
156.89  
138.04  
129.01  
128.97  
128.88  
127.91  
127.67  
127.02  
126.91  
126.83  
126.80  
126.40  
126.34  
124.62  
124.58  
120.35  
120.19  
116.43  
116.12  
109.06  
107.96

52.66  
50.21

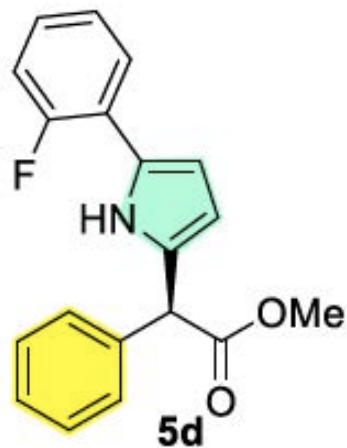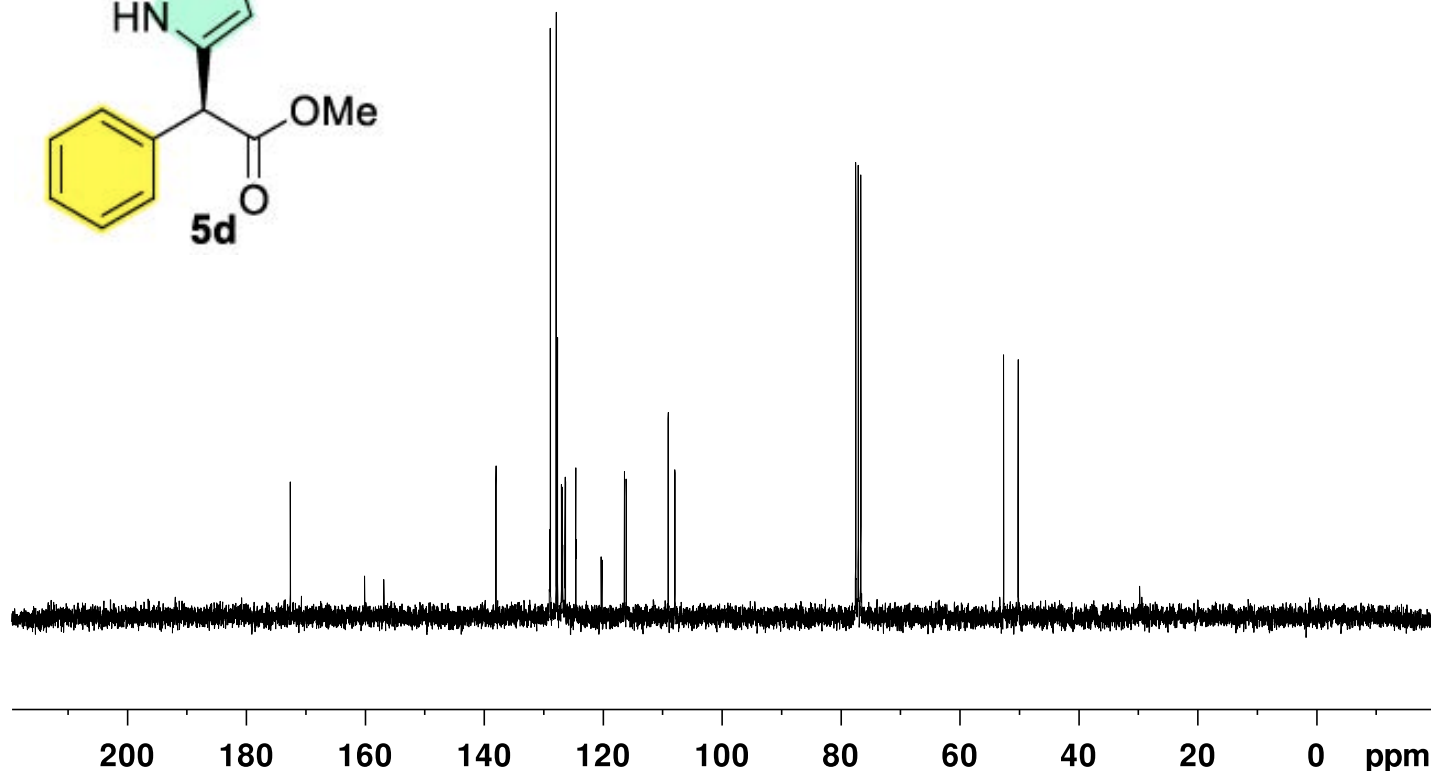



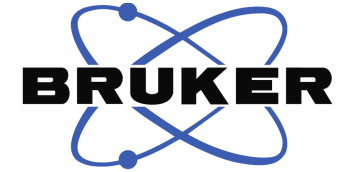

Current Data Parameters  
NAME FNMN-YX-5-p81  
EXPNO 2131  
PROCNO 1

F2 - Acquisition Parameters  
Date\_ 20230908  
Time 15.28  
INSTRUM spect  
PROBHD 5 mm PABBO BB-  
PULPROG zgfhigqn.2  
TD 131072  
SOLVENT CDCl3  
NS 16  
DS 4  
SWH 66964.289 Hz  
FIDRES 0.510897 Hz  
AQ 0.9786710 sec  
RG 203  
DW 7.467 usec  
DE 6.50 usec  
TE 296.1 K  
D1 1.00000000 sec  
D11 0.03000000 sec  
D12 0.00002000 sec  
TD0 1

==== CHANNEL f1 =====  
SFO1 282.3761148 MHz  
NUC1 19F  
P1 14.50 usec  
PLW1 10.39999962 W

==== CHANNEL f2 =====  
SFO2 300.1312005 MHz  
NUC2 1H  
CPDPRG[2] waltz16  
PCPD2 90.00 usec  
PLW2 14.00000000 W  
PLW12 0.17284000 W

F2 - Processing parameters  
SI 65536  
SF 282.4043552 MHz  
WDW EM  
SSB 0  
LB 0.30 Hz  
GB 0  
PC 1.00

-118.61

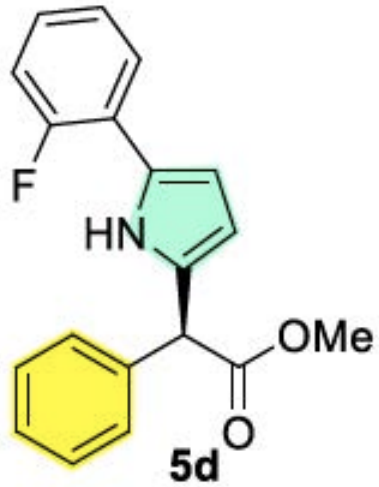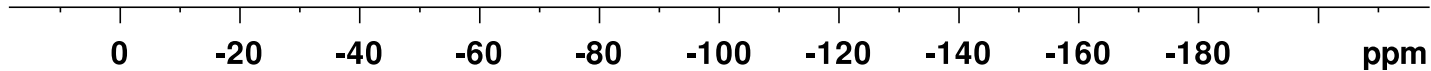



Current Data Parameters  
NAME HNMR-YX-7-p11  
EXPNO 23  
PROCNO 1

F2 - Acquisition Parameters  
Date\_ 20231103  
Time 9.34  
INSTRUM spect  
PROBHD 5 mm PADUL 13C  
PULPROG zg30  
TD 65536  
SOLVENT CDCl3  
NS 4  
DS 2  
SWH 8223.685 Hz  
FIDRES 0.125483 Hz  
AQ 3.9845889 sec  
RG 53.3  
DW 60.800 usec  
DE 6.50 usec  
TE 291.9 K  
D1 1.00000000 sec  
TD0 1

=====  
CHANNEL f1  
NUC1 1H  
P1 9.90 usec  
PLW1 23.00000000 W  
SFO1 400.1924713 MHz

F2 - Processing parameters  
SI 65536  
SF 400.1900228 MHz  
WDW EM  
SSB 0  
LB 0.30 Hz  
GB 0  
PC 1.00

7.999  
7.978  
7.508  
7.487  
7.345  
7.341  
7.327  
7.323  
7.309  
7.303  
7.291  
7.287  
7.270  
7.261  
7.254  
6.580  
6.572  
6.565  
6.124  
6.117  
6.110  
5.101  
3.887  
3.763

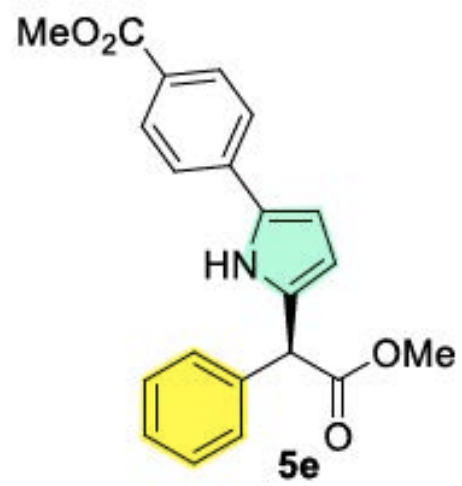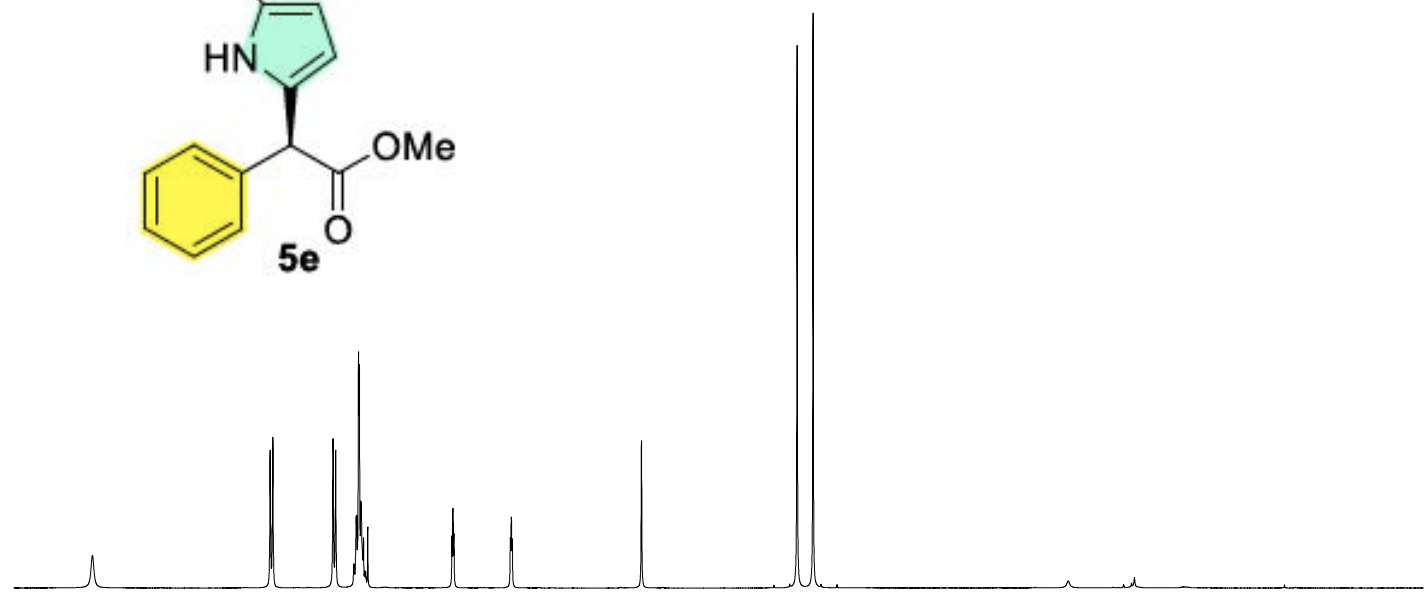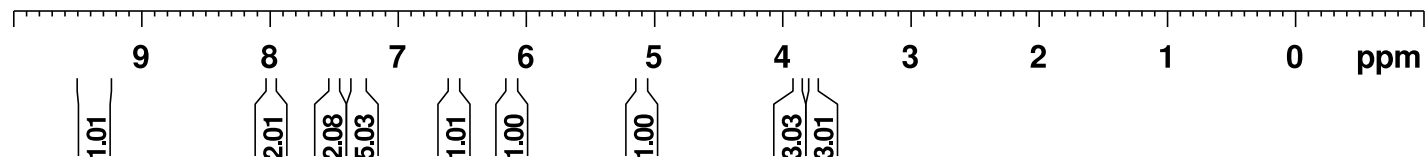



Current Data Parameters  
NAME CNMR-YX-7-p11  
EXPNO 24  
PROCNO 1

F2 - Acquisition Parameters  
Date\_ 20231103  
Time 9.42  
INSTRUM spect  
PROBHD 5 mm PADUL 13C  
PULPROG zgpg30  
TD 65536  
SOLVENT CDC13  
NS 100  
DS 4  
SWH 24038.461 Hz  
FIDRES 0.366798 Hz  
AQ 1.3631488 sec  
RG 37.77  
DW 20.800 usec  
DE 6.50 usec  
TE 292.5 K  
D1 2.00000000 sec  
D11 0.03000000 sec  
TD0 1

==== CHANNEL f1 =====  
NUC1 13C  
P1 9.80 usec  
PLW1 47.4000153 W  
SFO1 100.6379178 MHz

==== CHANNEL f2 =====  
CPDPRG[2] waltz16  
NUC2 1H  
PCPD2 90.00 usec  
PLW2 23.00000000 W  
PLW12 0.30712000 W  
PLW13 0.24877000 W  
SFO2 400.1916008 MHz

F2 - Processing parameters  
SI 32768  
SF 100.6278560 MHz  
WDW EM  
SSB 0  
LB 1.00 Hz  
GB 0  
PC 1.40

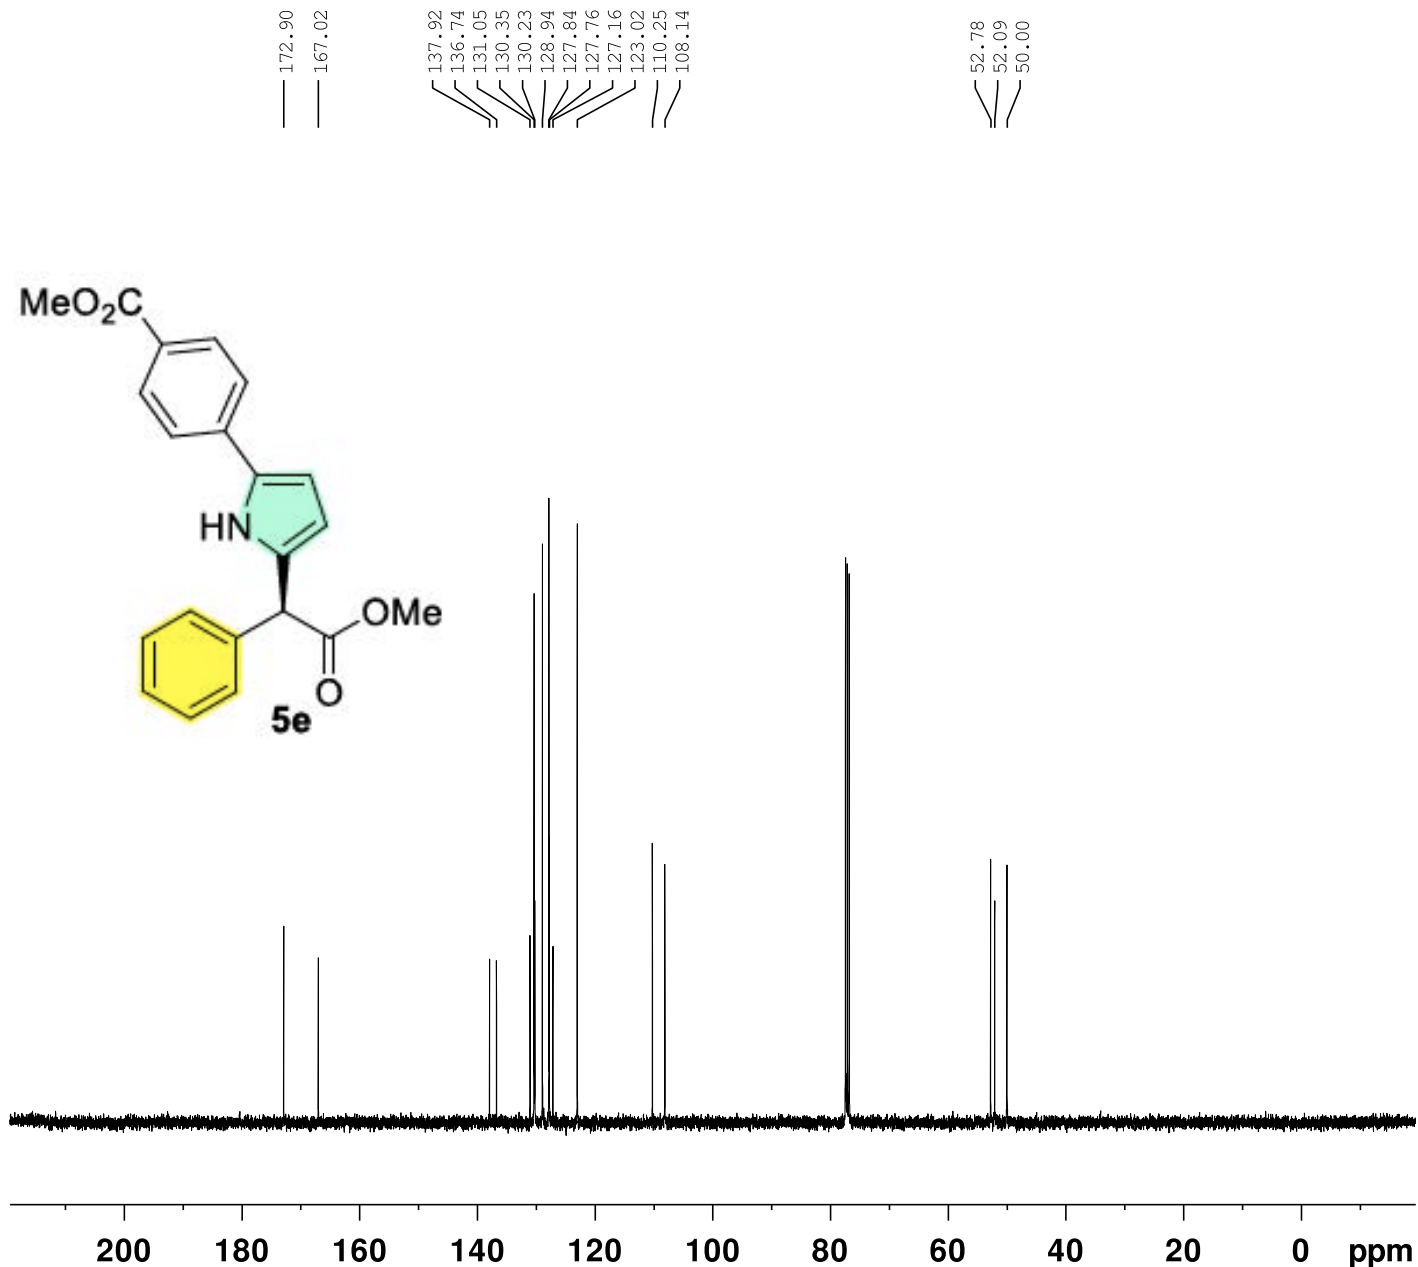



Current Data Parameters  
NAME HNMR-YX-7-p12  
EXPNO 20  
PROCNO 1

F2 - Acquisition Parameters  
Date\_ 20231101  
Time 15.17  
INSTRUM spect  
PROBHD 5 mm PADUL 13C  
PULPROG zg30  
TD 65536  
SOLVENT CDCl3  
NS 4  
DS 2  
SWH 8223.685 Hz  
FIDRES 0.125483 Hz  
AQ 3.9845889 sec  
RG 75.43  
DW 60.800 usec  
DE 6.50 usec  
TE 291.4 K  
D1 1.00000000 sec  
TD0 1

=====  
CHANNEL f1  
NUC1 1H  
P1 9.90 usec  
PLW1 23.00000000 W  
SFO1 400.1924713 MHz

F2 - Processing parameters  
SI 65536  
SF 400.1900190 MHz  
WDW EM  
SSB 0  
LB 0.30 Hz  
GB 0  
PC 1.00

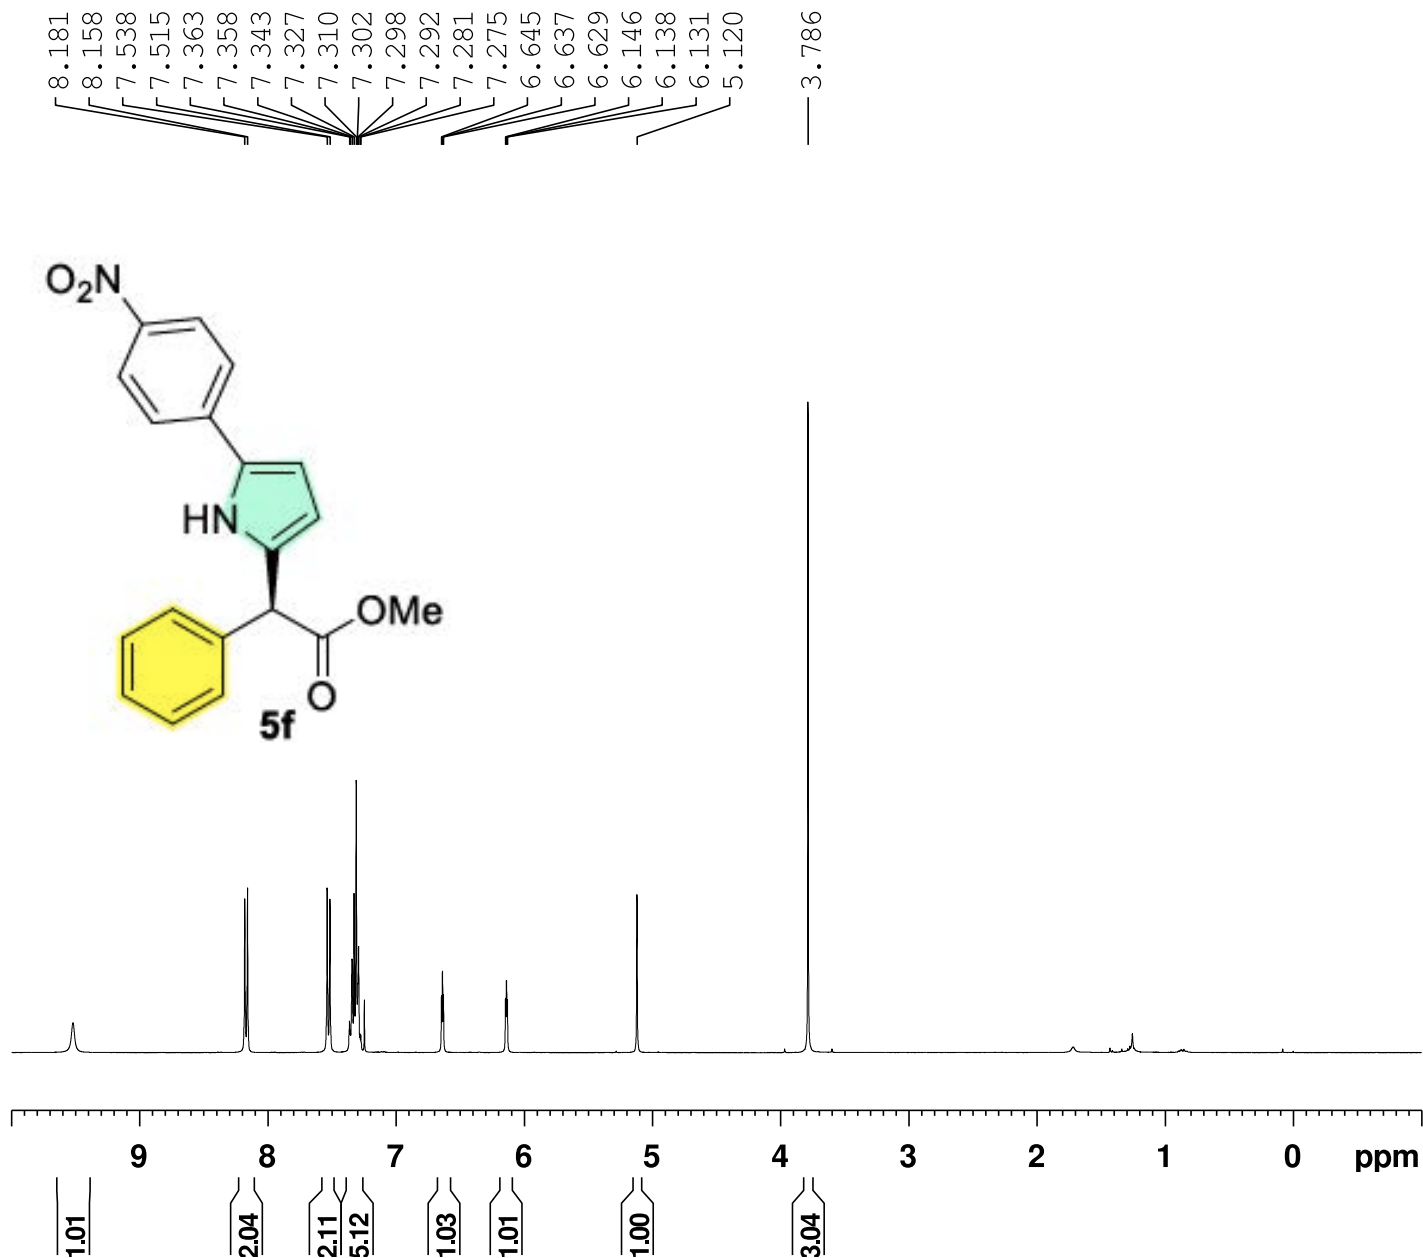



Current Data Parameters  
NAME CNMR-YX-7-p12  
EXPNO 21  
PROCNO 1

F2 - Acquisition Parameters  
Date\_ 20231101  
Time 15.24  
INSTRUM spect  
PROBHD 5 mm PADUL 13C  
PULPROG zgpg30  
TD 65536  
SOLVENT CDCl3  
NS 100  
DS 4  
SWH 24038.461 Hz  
FIDRES 0.366798 Hz  
AQ 1.3631488 sec  
RG 50.16  
DW 20.800 usec  
DE 6.50 usec  
TE 292.1 K  
D1 2.00000000 sec  
D11 0.03000000 sec  
TD0 1

==== CHANNEL f1 =====  
NUC1 13C  
P1 9.80 usec  
PLW1 47.4000153 W  
SFO1 100.6379178 MHz

==== CHANNEL f2 =====  
CPDPRG[2] waltz16  
NUC2 1H  
PCPD2 90.00 usec  
PLW2 23.00000000 W  
PLW12 0.30712000 W  
PLW13 0.24877000 W  
SFO2 400.1916008 MHz

F2 - Processing parameters  
SI 32768  
SF 100.6278560 MHz  
WDW EM  
SSB 0  
LB 1.00 Hz  
GB 0  
PC 1.40

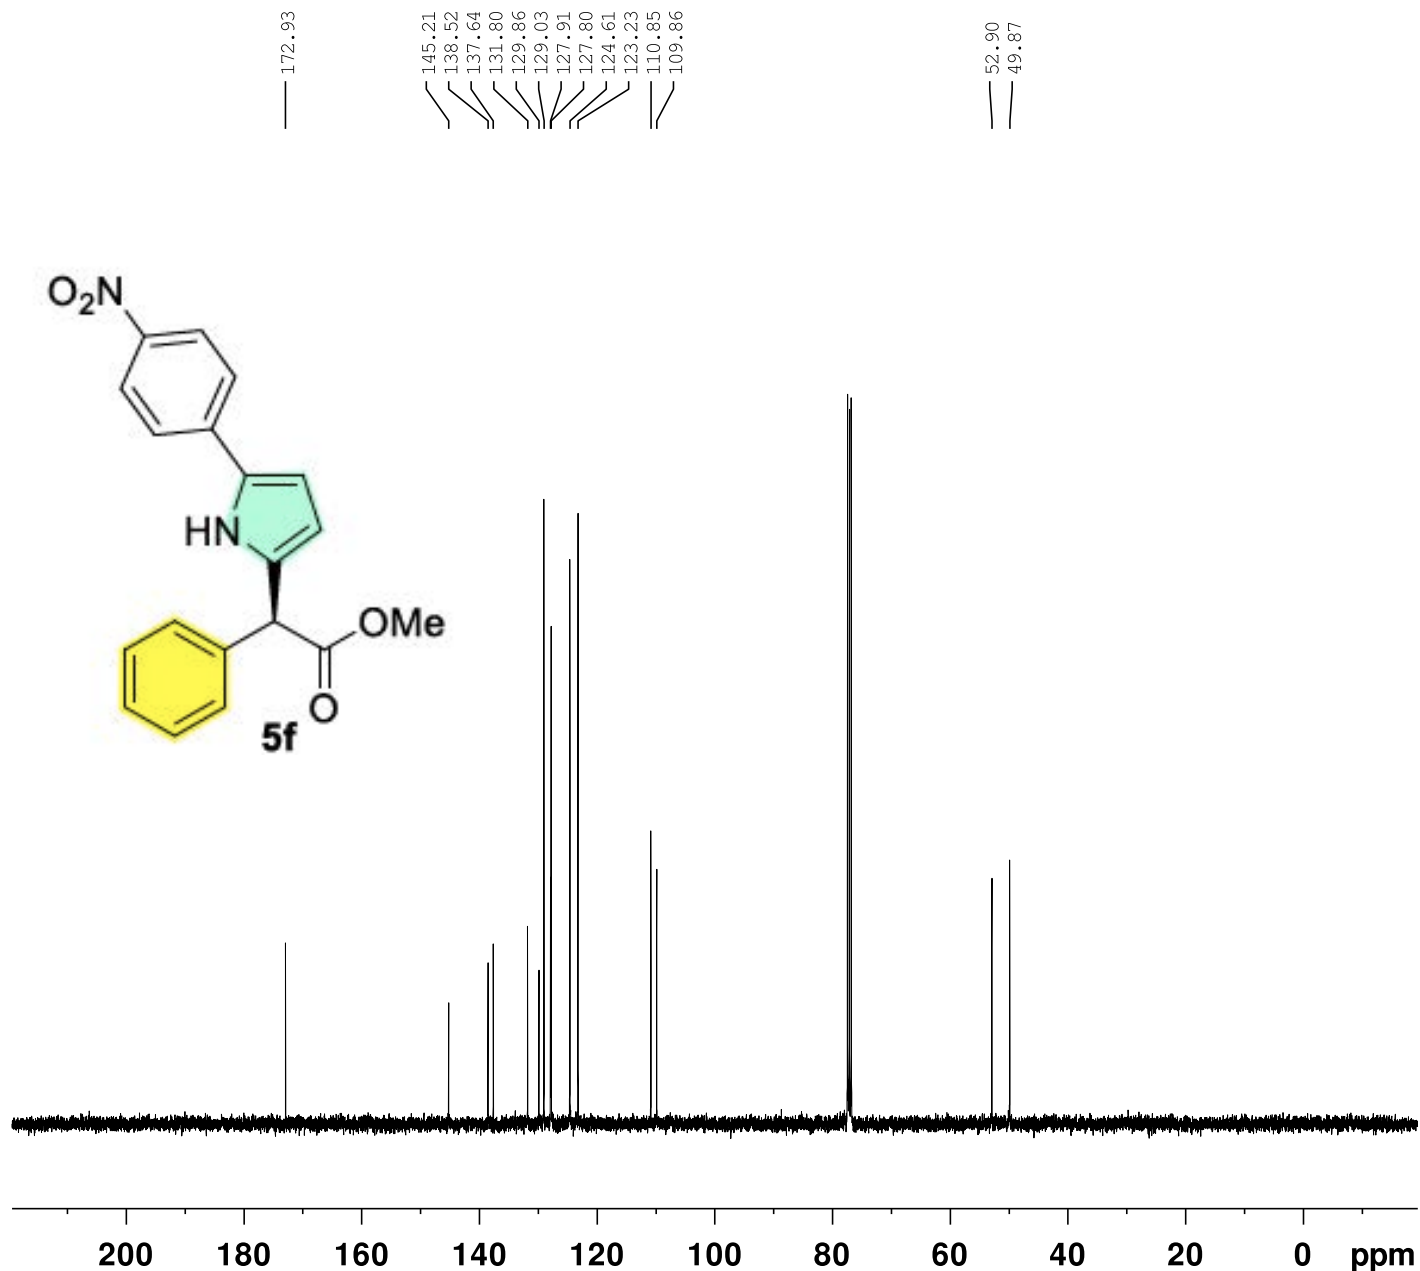



Current Data Parameters  
NAME NMR-YX-6-p33  
EXPNO 1  
PROCNO 1

F2 - Acquisition Parameters  
Date\_ 20231107  
Time 11.52 h  
INSTRUM Avance  
PROBHD Z116098\_0833 (  
PULPROG zg30  
TD 65536  
SOLVENT CDCl3  
NS 16  
DS 2  
SWH 8196.722 Hz  
FIDRES 0.250144 Hz  
AQ 3.9976959 sec  
RG 48.7805  
DW 61.000 usec  
DE 13.54 usec  
TE 294.0 K  
D1 1.00000000 sec  
TD0 1  
SF01 400.1324708 MHz  
NUC1 1H  
P0 3.33 usec  
P1 10.00 usec  
PLW1 20.73200035 W

F2 - Processing parameters  
SI 65536  
SF 400.1300394 MHz  
WDW EM  
SSB 0  
LB 0.30 Hz  
GB 0  
PC 1.00

7.480  
7.472  
7.463  
7.456  
7.443  
7.425  
7.364  
7.358  
7.342  
7.338  
7.326  
7.310  
7.306  
7.296  
7.285  
7.280  
7.272  
7.264  
7.256  
7.248  
7.243  
6.442  
6.434  
6.427  
6.201  
6.194  
6.186  
5.136  
3.736

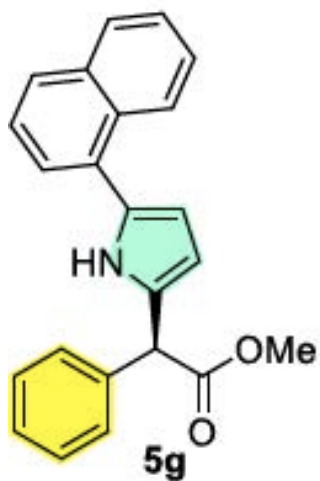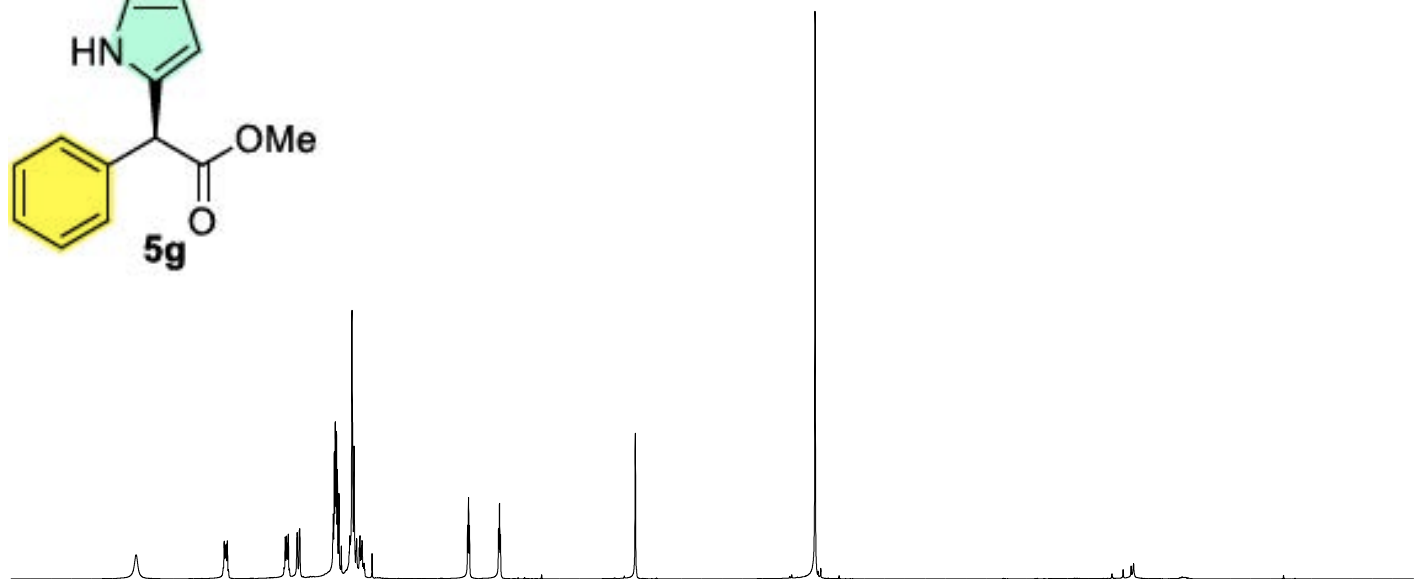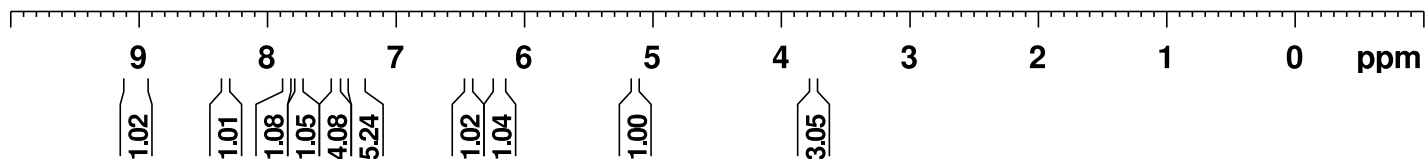



Current Data Parameters  
NAME NMR-YX-6-p33  
EXPNO 2  
PROCNO 1

F2 - Acquisition Parameters  
Date\_ 20231107  
Time 11.59 h  
INSTRUM Avance  
PROBHD Z116098\_0833 (  
PULPROG zgpg30  
TD 65536  
SOLVENT CDCl3  
NS 100  
DS 4  
SWH 23809.523 Hz  
FIDRES 0.726609 Hz  
AQ 1.3762560 sec  
RG 44.8788  
DW 21.000 usec  
DE 6.50 usec  
TE 294.0 K  
D1 2.00000000 sec  
D11 0.03000000 sec  
TD0 1  
SFO1 100.6228298 MHz  
NUC1 13C  
P0 3.33 usec  
P1 10.00 usec  
PLW1 87.89900208 W  
SFO2 400.1316005 MHz  
NUC2 1H  
CPDPRG[2] waltz65  
PCPD2 90.00 usec  
PLW2 20.73200035 W  
PLW12 0.25595000 W  
PLW13 0.12874000 W

F2 - Processing parameters  
SI 32768  
SF 100.6127685 MHz  
WDW EM  
SSB 0  
LB 1.00 Hz  
GB 0  
PC 1.40

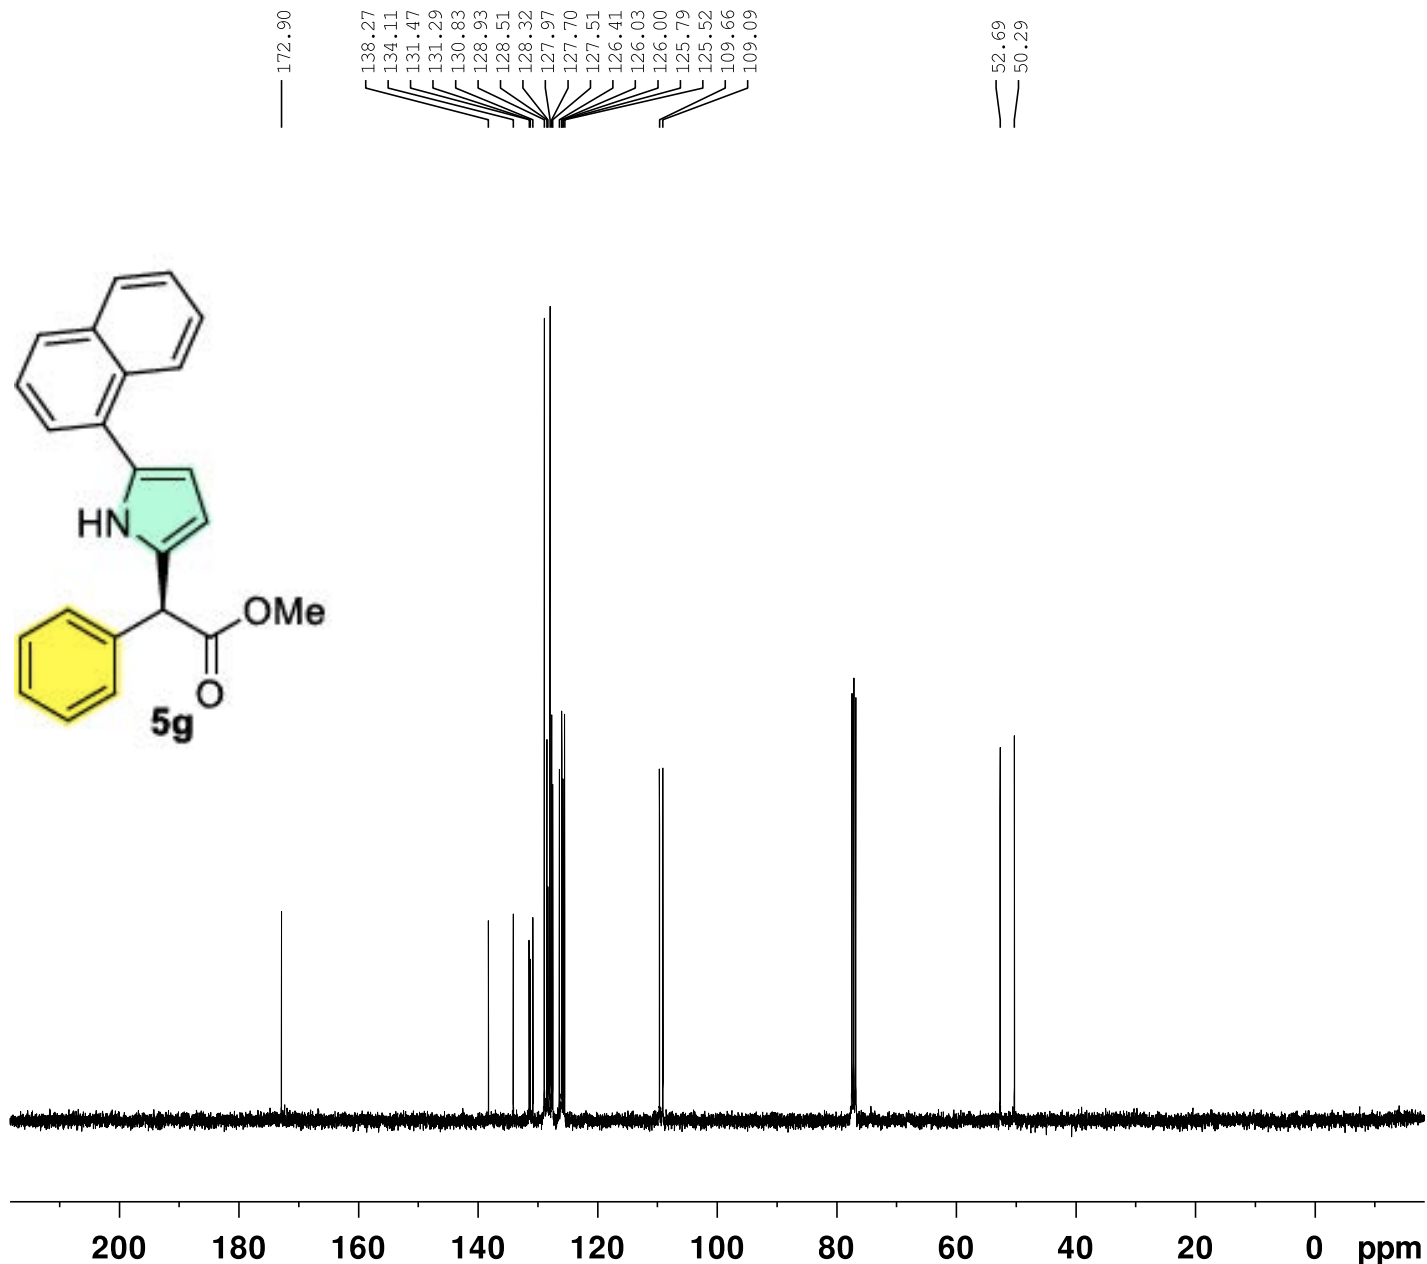



Current Data Parameters  
NAME NMR-YX-6-p32  
EXPNO 1  
PROCNO 1

F2 - Acquisition Parameters  
Date\_ 20231107  
Time 11.40 h  
INSTRUM Avance  
PROBHD Z116098\_0833 (  
PULPROG zg30  
TD 65536  
SOLVENT CDCl3  
NS 16  
DS 2  
SWH 8196.722 Hz  
FIDRES 0.250144 Hz  
AQ 3.9976959 sec  
RG 44.4444  
DW 61.000 usec  
DE 13.54 usec  
TE 294.0 K  
D1 1.00000000 sec  
TD0 1  
SF01 400.1324708 MHz  
NUC1 1H  
P0 3.33 usec  
P1 10.00 usec  
PLW1 20.73200035 W

F2 - Processing parameters  
SI 65536  
SF 400.1300464 MHz  
WDW EM  
SSB 0  
LB 0.30 Hz  
GB 0  
PC 1.00

7.613  
7.439  
7.422  
7.405  
7.402  
7.388  
7.386  
7.368  
7.349  
7.324  
7.315  
7.312  
7.297  
7.290  
7.275  
7.268  
7.259  
7.254  
7.247  
6.572  
6.564  
6.556  
6.135  
6.128  
6.121  
5.112  
3.743

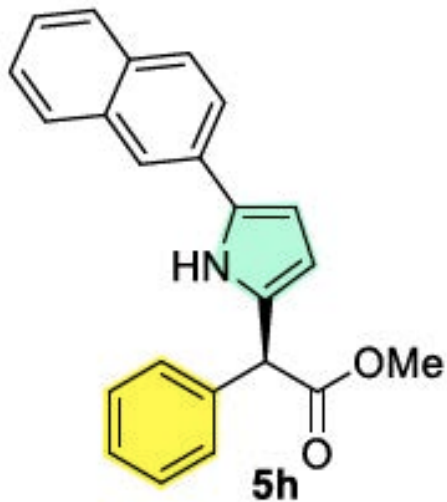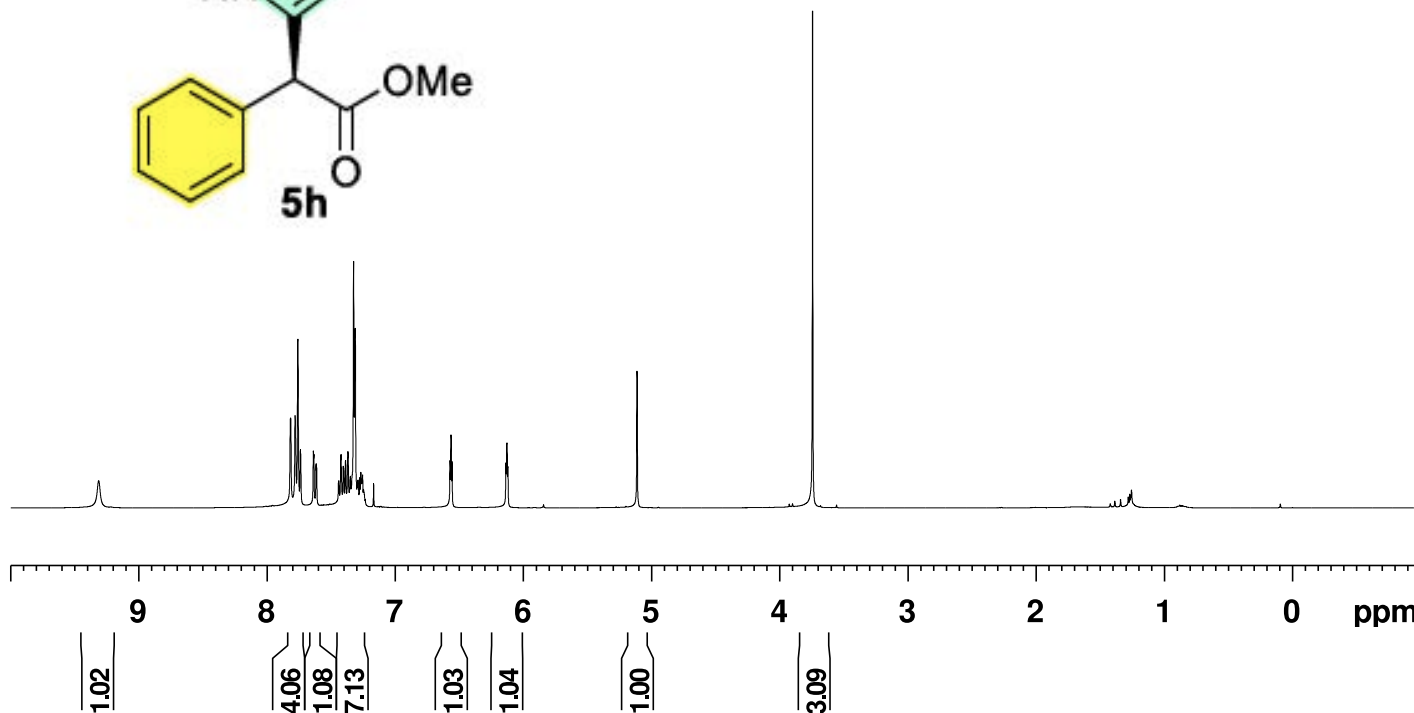





Current Data Parameters  
NAME NMR-YX-6-p32  
EXPNO 2  
PROCNO 1

F2 - Acquisition Parameters  
Date\_ 20231107  
Time 11.47 h  
INSTRUM Avance  
PROBHD Z116098\_0833 (  
PULPROG zgpg30  
TD 65536  
SOLVENT CDC13  
NS 100  
DS 4  
SWH 23809.523 Hz  
FIDRES 0.726609 Hz  
AQ 1.3762560 sec  
RG 47.4244  
DW 21.000 usec  
DE 6.50 usec  
TE 294.2 K  
D1 2.00000000 sec  
D11 0.03000000 sec  
TD0 1  
SFO1 100.6228298 MHz  
NUC1 13C  
P0 3.33 usec  
P1 10.00 usec  
PLW1 87.89900208 W  
SFO2 400.1316005 MHz  
NUC2 1H  
CPDPRG[2] waltz65  
PCPD2 90.00 usec  
PLW2 20.73200035 W  
PLW12 0.25595000 W  
PLW13 0.12874000 W

F2 - Processing parameters  
SI 32768  
SF 100.6127685 MHz  
WDW EM  
SSB 0  
LB 1.00 Hz  
GB 0  
PC 1.40

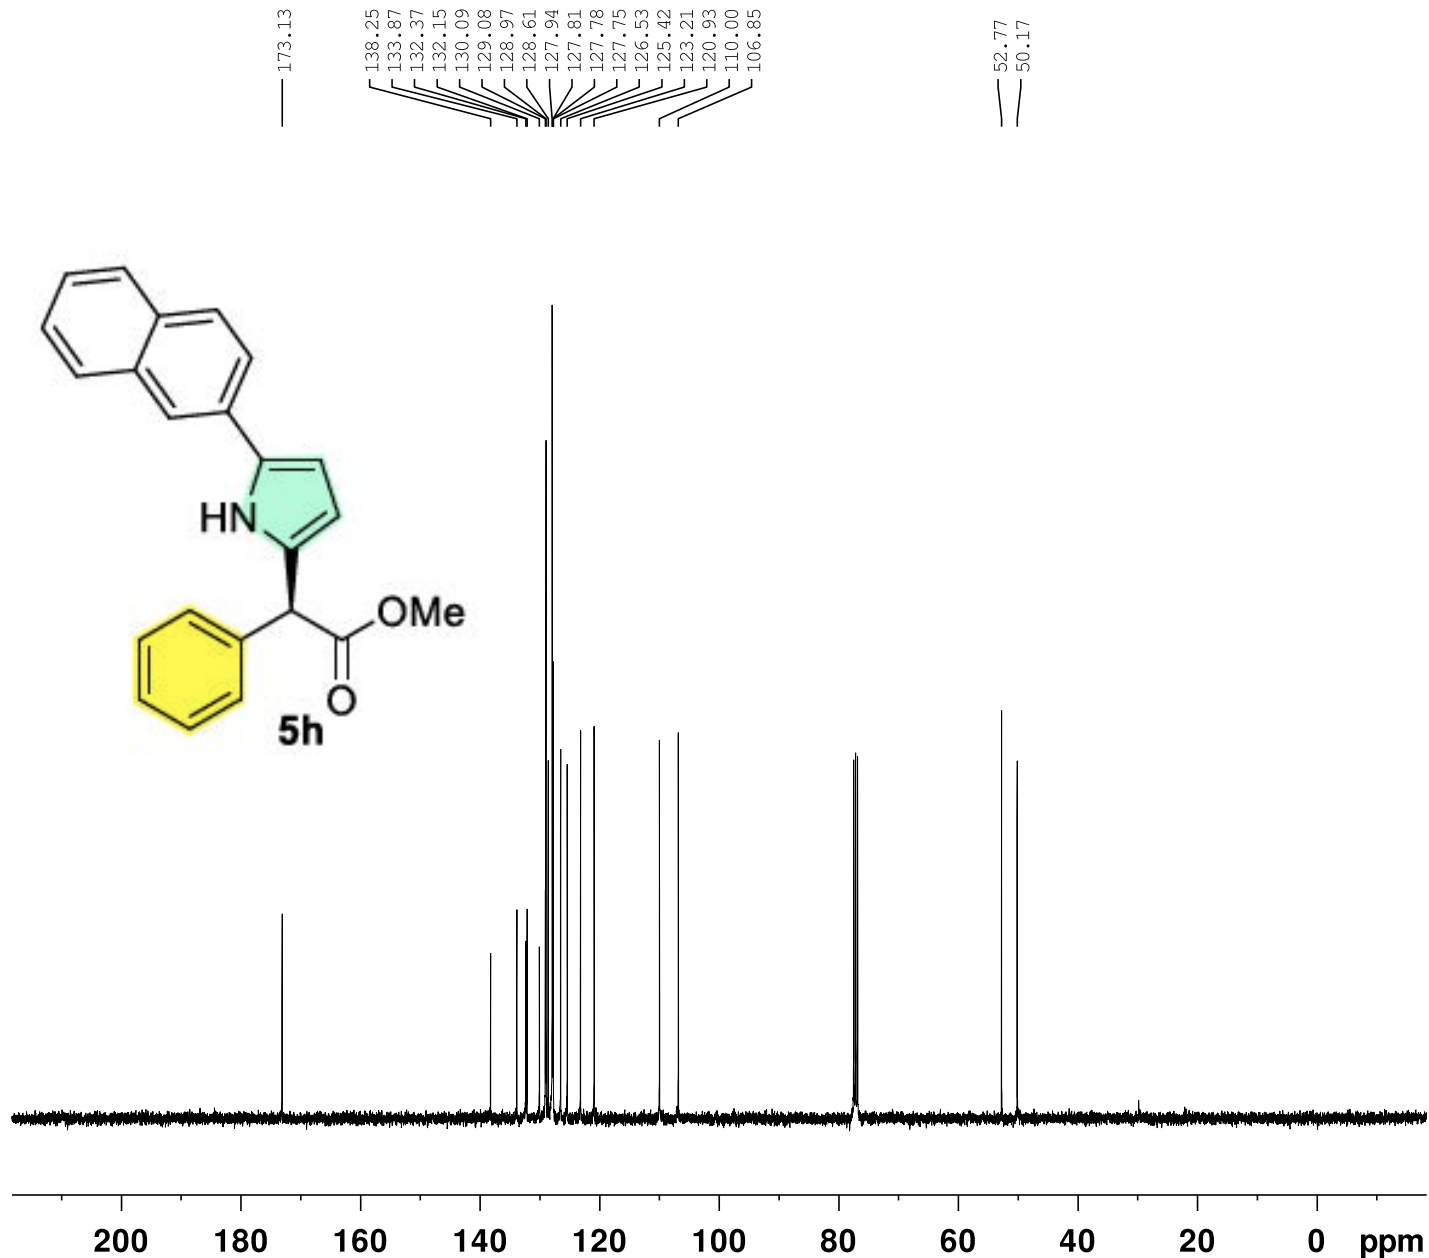



Current Data Parameters  
NAME HNMR-YX-5-p70  
EXPNO 2060  
PROCNO 1

F2 - Acquisition Parameters  
Date\_ 20230809  
Time 20.29  
INSTRUM spect  
PROBHD 5 mm PABBO BB-  
PULPROG zg30  
TD 65536  
SOLVENT CDCl3  
NS 16  
DS 2  
SWH 6009.615 Hz  
FIDRES 0.091699 Hz  
AQ 5.4525952 sec  
RG 101  
DW 83.200 usec  
DE 6.50 usec  
TE 297.9 K  
D1 1.00000000 sec  
TD0 1

==== CHANNEL f1 =====  
SFO1 300.1318534 MHz  
NUC1 1H  
P1 10.00 usec  
PLW1 14.00000000 W

F2 - Processing parameters  
SI 65536  
SF 300.1300192 MHz  
WDW EM  
SSB 0  
LB 0.30 Hz  
GB 0  
PC 1.00

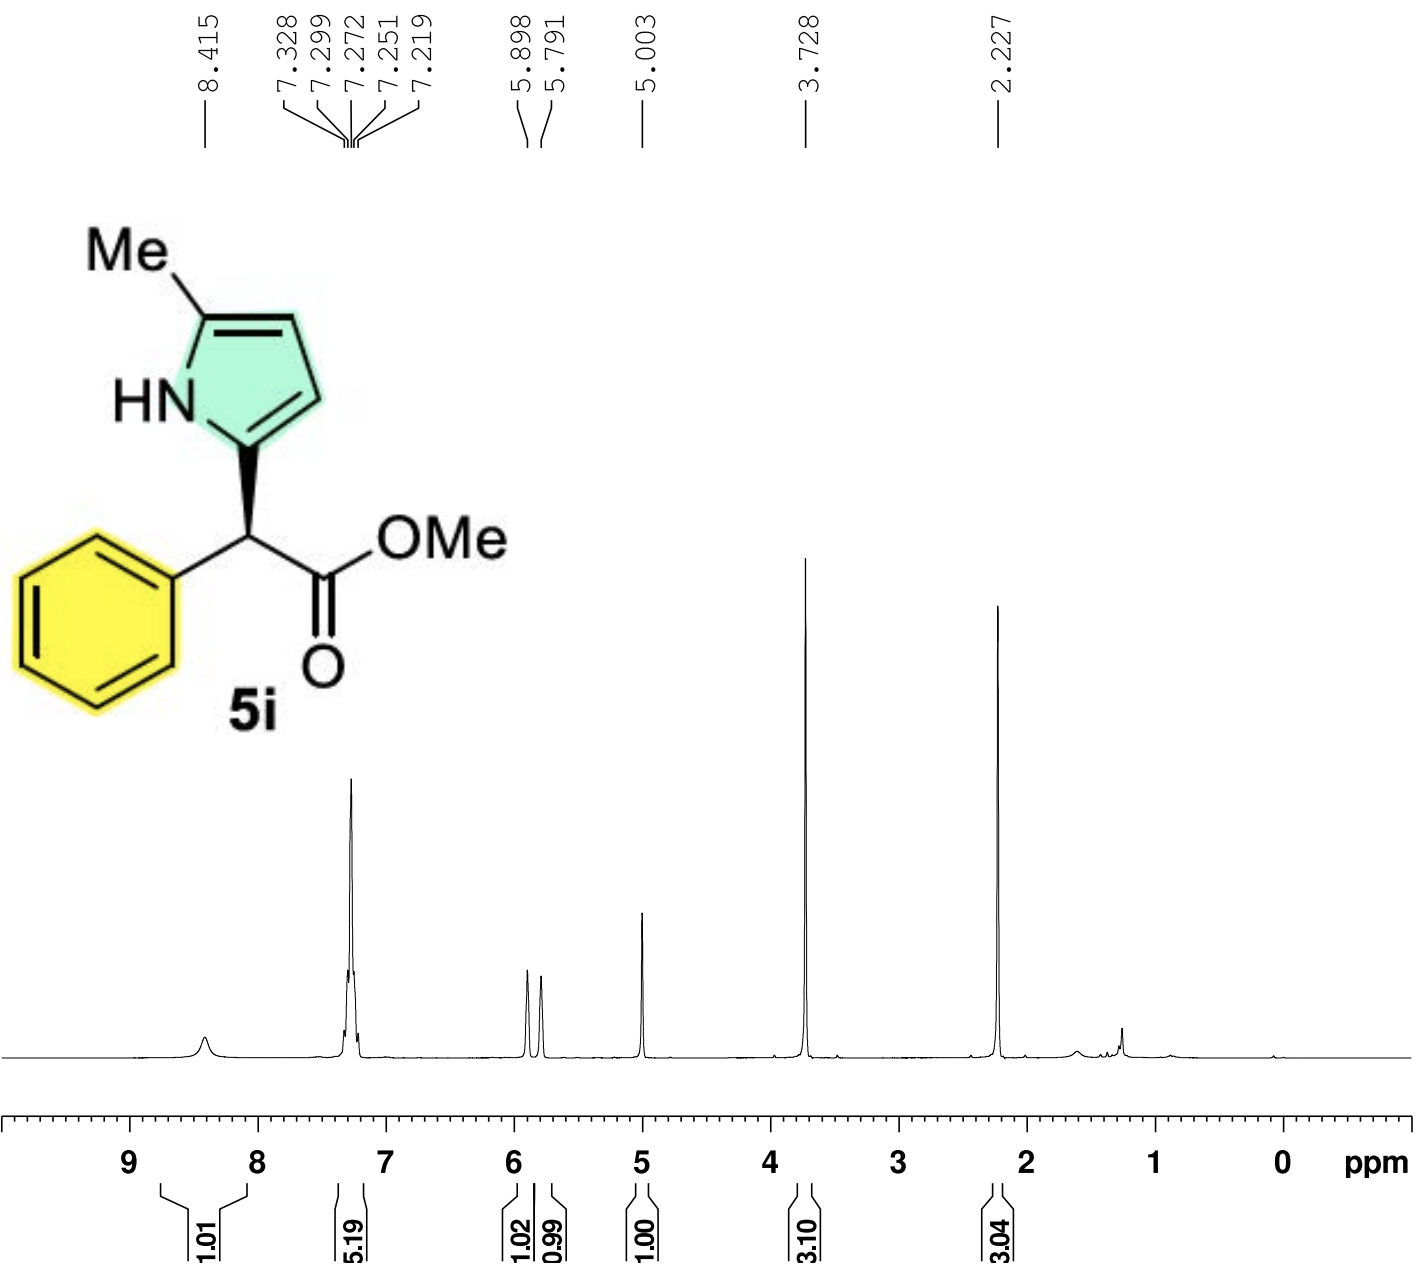



Current Data Parameters  
NAME CNMR-YX-5-p70  
EXPNO 2073  
PROCNO 1

F2 - Acquisition Parameters  
Date\_ 20230810  
Time 2.36  
INSTRUM spect  
PROBHD 5 mm PABBO BB-  
PULPROG zgpg30  
TD 65536  
SOLVENT CDCl3  
NS 150  
DS 4  
SWH 18028.846 Hz  
FIDRES 0.275098 Hz  
AQ 1.8175317 sec  
RG 203  
DW 27.733 usec  
DE 6.50 usec  
TE 298.7 K  
D1 2.00000000 sec  
D11 0.03000000 sec  
TD0 1

==== CHANNEL f1 =====  
SFO1 75.4752949 MHz  
NUC1 13C  
P1 9.50 usec  
PLW1 34.20000076 W  
  
==== CHANNEL f2 =====  
SFO2 300.1312005 MHz  
NUC2 1H  
CPDPRG[2] waltz16  
PCPD2 90.00 usec  
PLW2 14.00000000 W  
PLW12 0.17284000 W  
PLW13 0.14000000 W

F2 - Processing parameters  
SI 32768  
SF 75.4677485 MHz  
WDW EM  
SSB 0  
LB 1.00 Hz  
GB 0  
PC 1.40

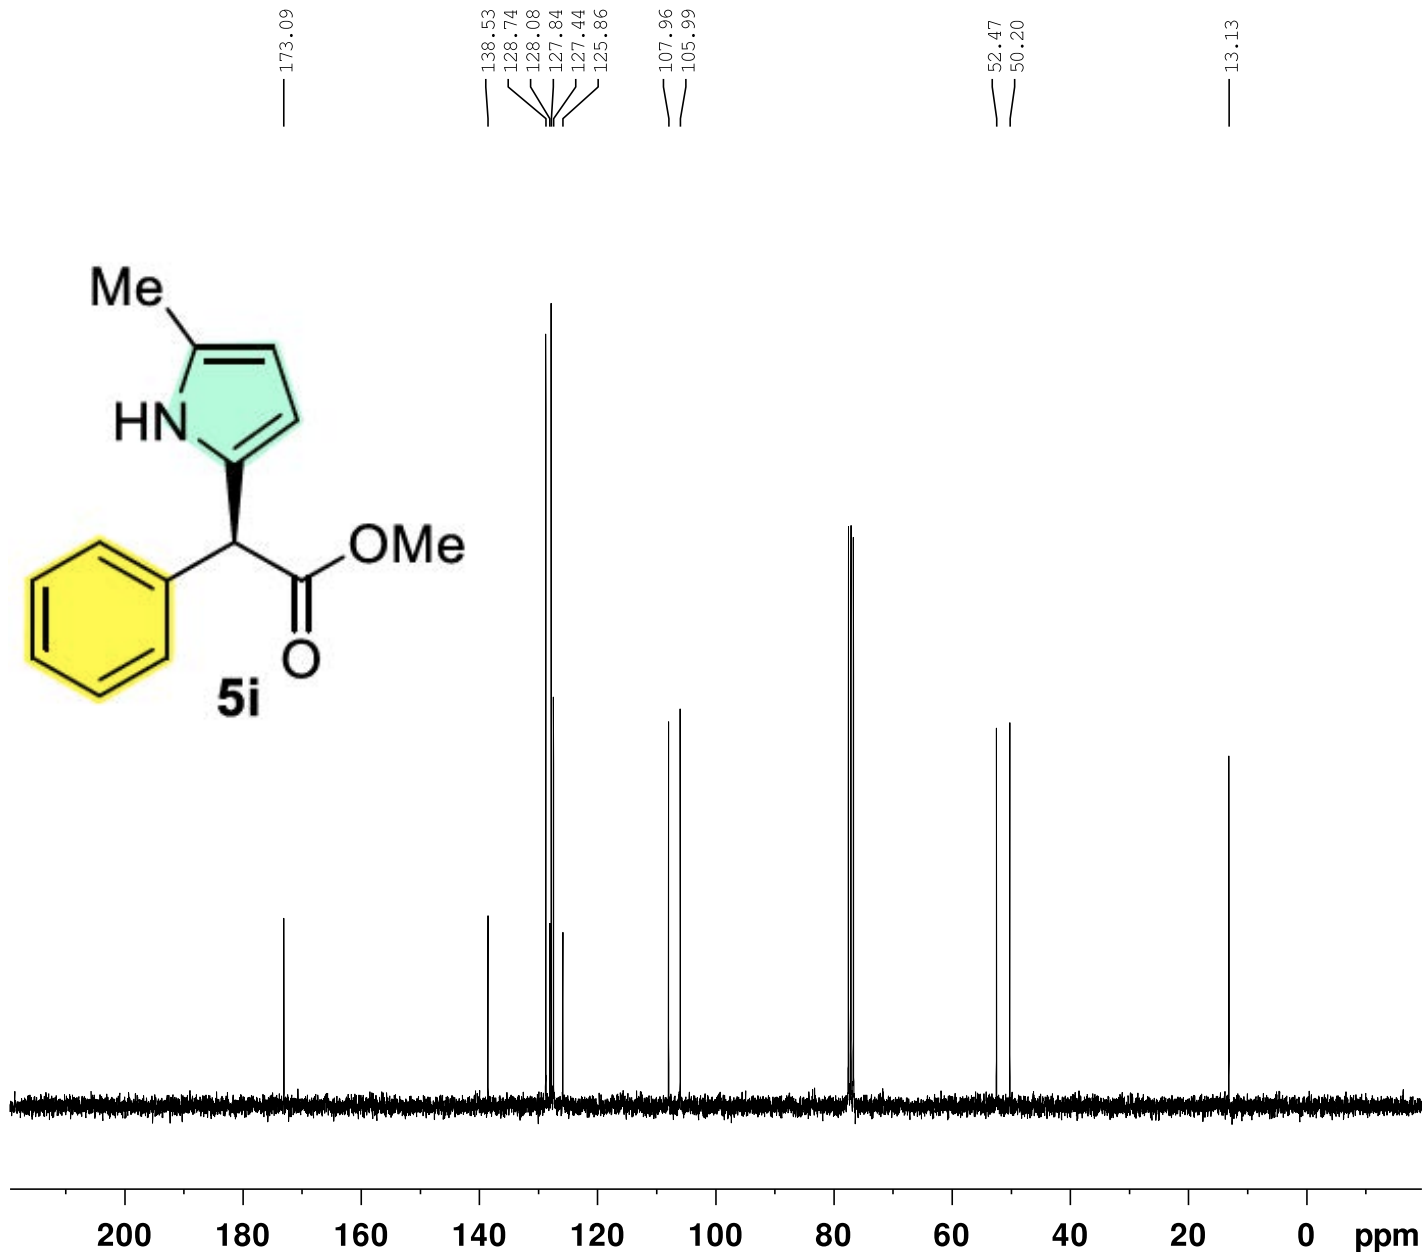



Current Data Parameters  
NAME HNMR-YX-5-p82  
EXPNO 1  
PROCNO 1

F2 - Acquisition Parameters

Date\_ 20231019  
Time 7.00 h  
INSTRUM Avance  
PROBHD z116098\_0833 (  
PULPROG zg30  
TD 65536  
SOLVENT CDC13  
NS 16  
DS 2  
SWH 8196.722 Hz  
FIDRES 0.250144 Hz  
AQ 3.9976959 sec  
RG 100.806  
DW 61.000 usec  
DE 13.54 usec  
TE 293.6 K  
D1 1.00000000 sec  
TD0 1  
SFO1 400.1324708 MHz  
NUC1 1H  
P0 3.33 usec  
P1 10.00 usec  
PLW1 20.73200035 W

F2 - Processing parameters

SI 65536  
SF 400.1300165 MHz  
WDW EM  
SSB 0  
LB 0.30 Hz  
GB 0  
PC 1.00

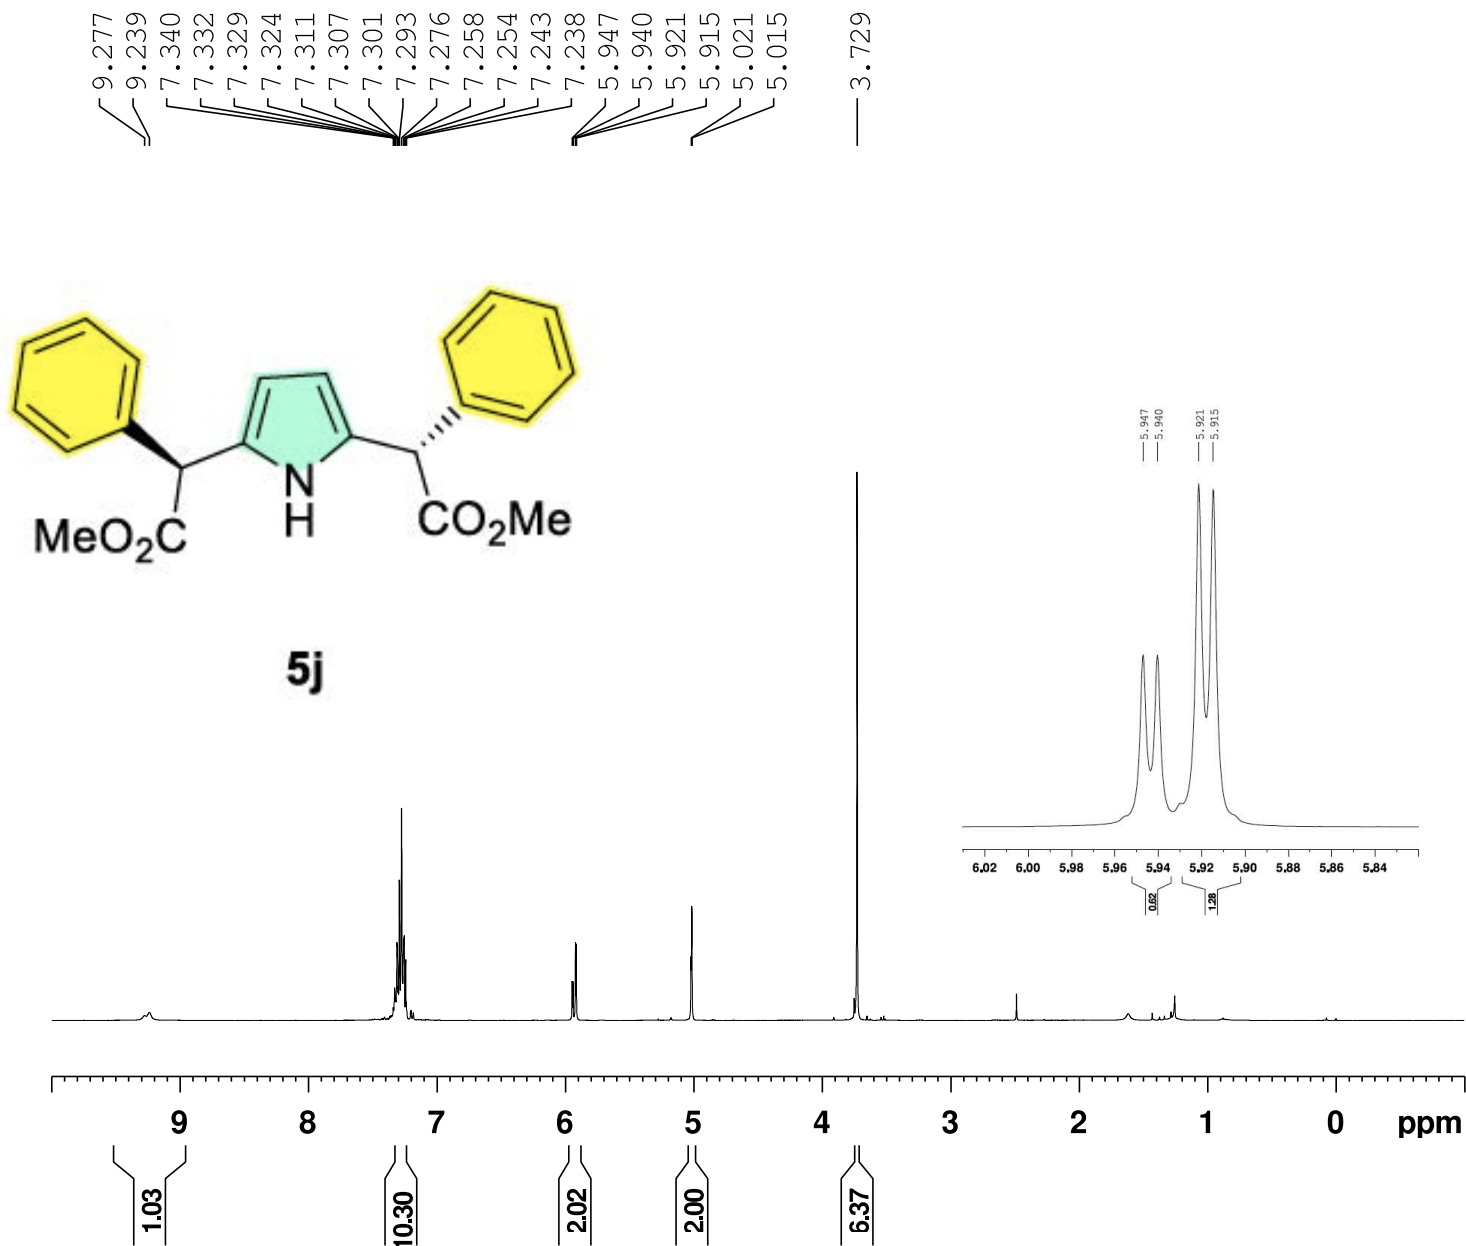



Current Data Parameters  
NAME CNMR-YX-5-p82  
EXPNO 2135  
PROCNO 1

F2 - Acquisition Parameters

Date\_ 20230911  
Time 16.52  
INSTRUM spect  
PROBHD 5 mm PABBO BB-  
PULPROG zgpg30  
TD 65536  
SOLVENT CDC13  
NS 100  
DS 4  
SWH 18028.846 Hz  
FIDRES 0.275098 Hz  
AQ 1.8175317 sec  
RG 203  
DW 27.733 usec  
DE 6.50 usec  
TE 296.8 K  
D1 2.00000000 sec  
D11 0.03000000 sec  
TD0 1

==== CHANNEL f1 =====  
SFO1 75.4752949 MHz  
NUC1 13C  
P1 9.50 usec  
PLW1 34.20000076 W

==== CHANNEL f2 =====  
SFO2 300.1312005 MHz  
NUC2 1H  
CPDPRG[2] waltz16  
PCPD2 90.00 usec  
PLW2 14.00000000 W  
PLW12 0.17284000 W  
PLW13 0.14000000 W

F2 - Processing parameters  
SI 32768  
SF 75.4677485 MHz  
WDW EM  
SSB 0  
LB 1.00 Hz  
GB 0  
PC 1.40

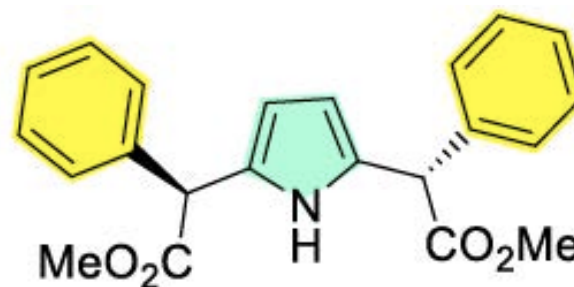

5j

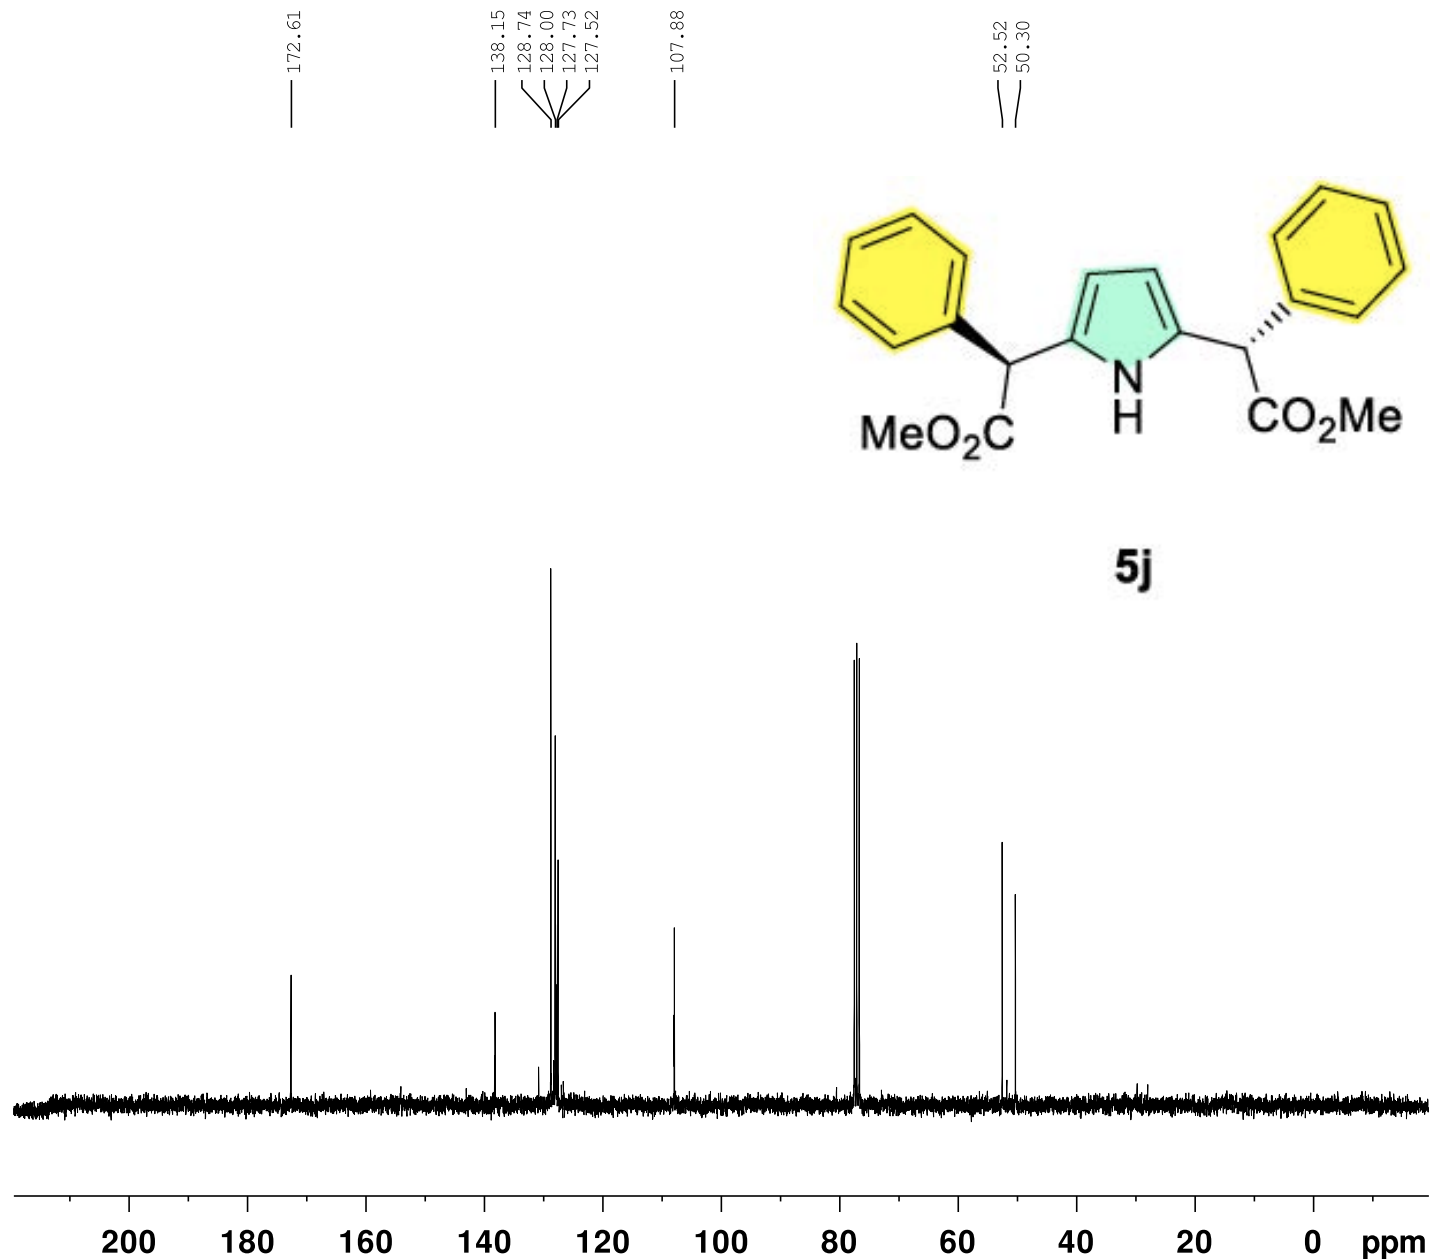



Current Data Parameters  
NAME HNMR-YX-7-p26  
EXPNO 44  
PROCNO 1

F2 - Acquisition Parameters  
Date\_ 20231110  
Time 16.06  
INSTRUM spect  
PROBHD 5 mm PADUL 13C  
PULPROG zg30  
TD 65536  
SOLVENT CDCl3  
NS 4  
DS 2  
SWH 8223.685 Hz  
FIDRES 0.125483 Hz  
AQ 3.9845889 sec  
RG 53.3  
DW 60.800 usec  
DE 6.50 usec  
TE 292.0 K  
D1 1.00000000 sec  
TD0 1

==== CHANNEL f1 =====  
NUC1 1H  
P1 9.90 usec  
PLW1 23.00000000 W  
SFO1 400.1924713 MHz

F2 - Processing parameters  
SI 65536  
SF 400.1900391 MHz  
WDW EM  
SSB 0  
LB 0.30 Hz  
GB 0  
PC 1.00

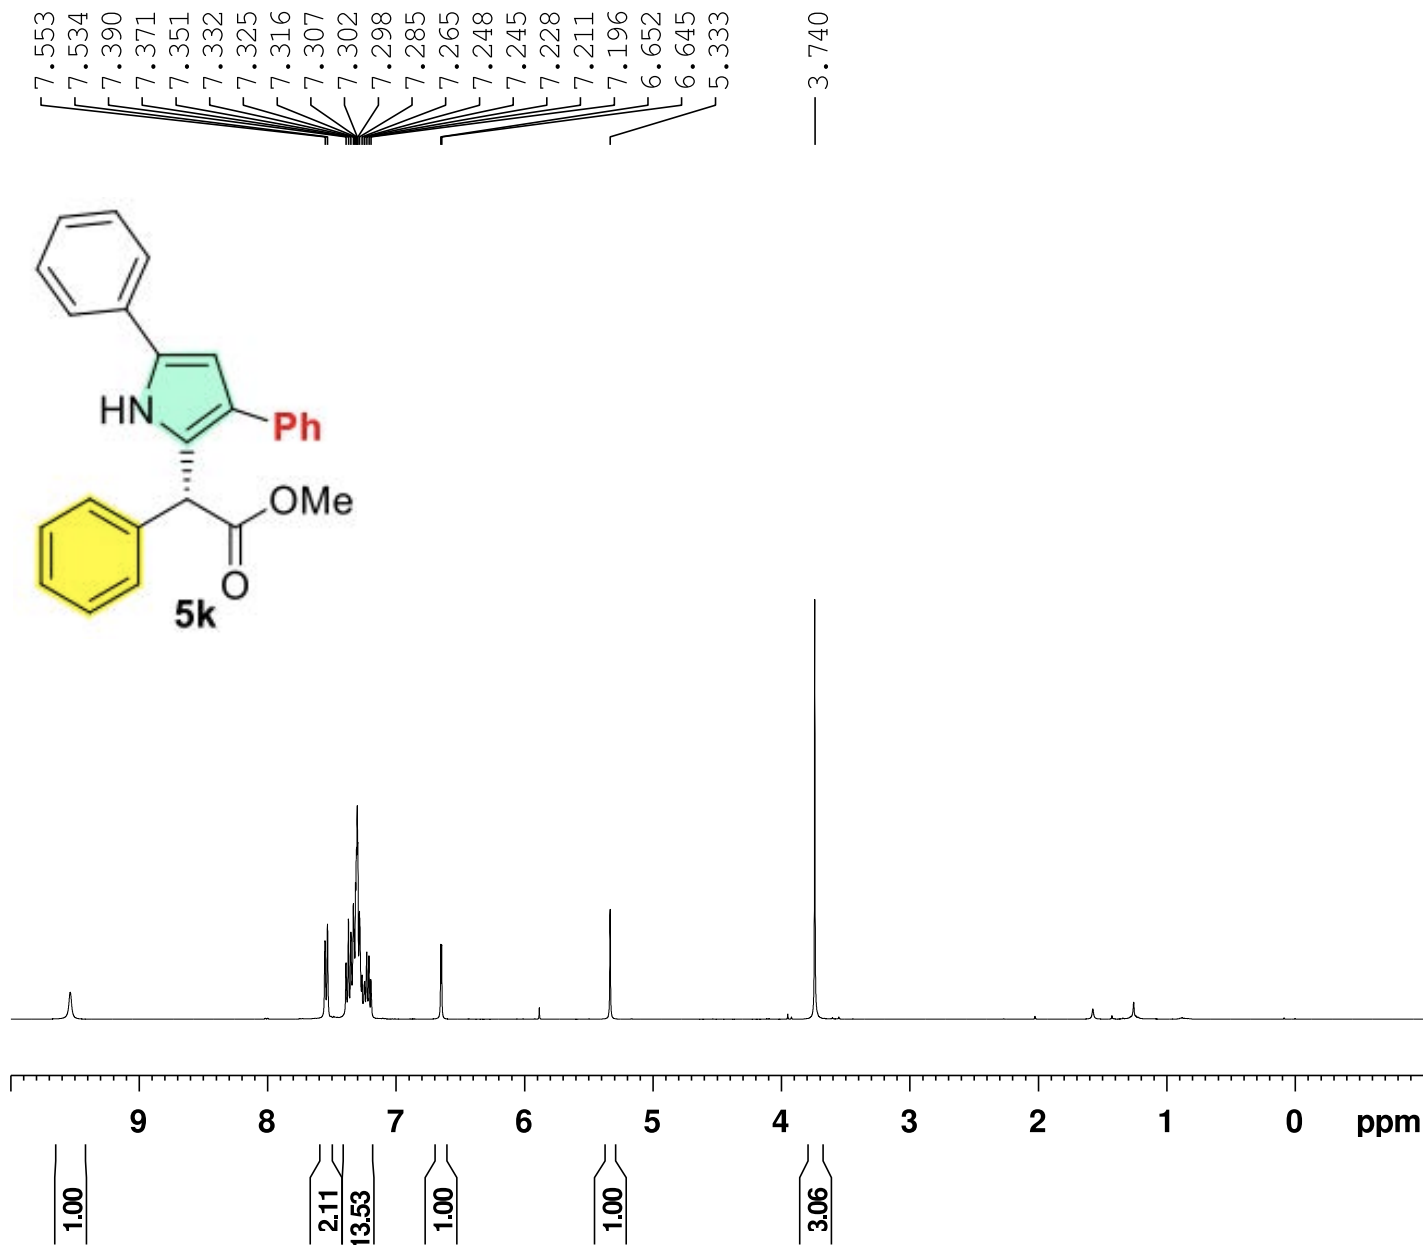



Current Data Parameters  
NAME CNMR-YX-7-p26  
EXPNO 45  
PROCNO 1

F2 - Acquisition Parameters  
Date\_ 20231110  
Time 16.14  
INSTRUM spect  
PROBHD 5 mm PADUL 13C  
PULPROG zgpg30  
TD 65536  
SOLVENT CDC13  
NS 100  
DS 4  
SWH 24038.461 Hz  
FIDRES 0.366798 Hz  
AQ 1.3631488 sec  
RG 35.06  
DW 20.800 usec  
DE 6.50 usec  
TE 292.6 K  
D1 2.00000000 sec  
D11 0.03000000 sec  
TD0 1

==== CHANNEL f1 =====  
NUC1 13C  
P1 9.80 usec  
PLW1 47.4000153 W  
SFO1 100.6379178 MHz

==== CHANNEL f2 =====  
CPDPRG[2] waltz16  
NUC2 1H  
PCPD2 90.00 usec  
PLW2 23.00000000 W  
PLW12 0.30712000 W  
PLW13 0.24877000 W  
SFO2 400.1916008 MHz

F2 - Processing parameters  
SI 32768  
SF 100.6278560 MHz  
WDW EM  
SSB 0  
LB 1.00 Hz  
GB 0  
PC 1.40

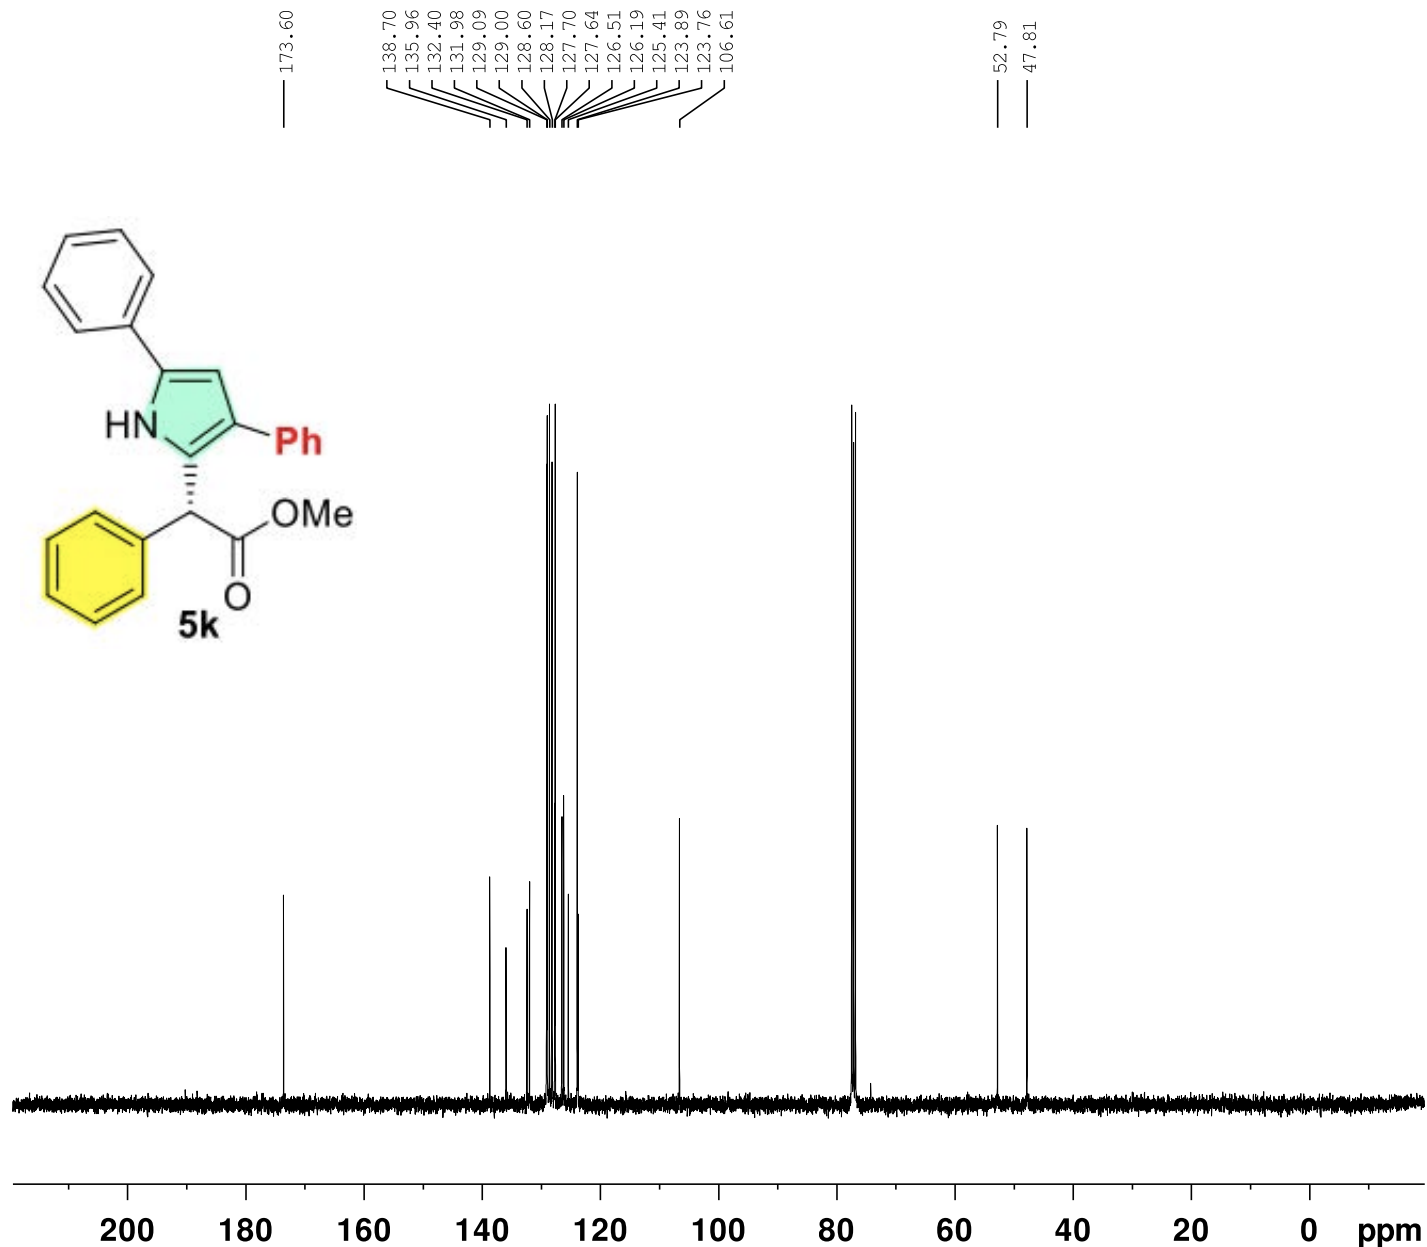



Current Data Parameters  
NAME NMR-YX-7-p67  
EXPNO 2236  
PROCNO 1

F2 - Acquisition Parameters  
Date\_ 20231227  
Time 16.42 h  
INSTRUM spect  
PROBHD Z104275\_0225 (   
PULPROG zg30  
TD 65536  
SOLVENT CDCl3  
NS 16  
DS 2  
SWH 6009.615 Hz  
FIDRES 0.183399 Hz  
AQ 5.4525952 sec  
RG 114  
DW 83.200 usec  
DE 6.50 usec  
TE 294.4 K  
D1 1.00000000 sec  
TD0 1  
SF01 300.1318533 MHz  
NUC1 1H  
P1 10.00 usec  
PLW1 14.00000000 W

F2 - Processing parameters  
SI 65536  
SF 300.1300162 MHz  
WDW EM  
SSB 0  
LB 0.30 Hz  
GB 0  
PC 1.00

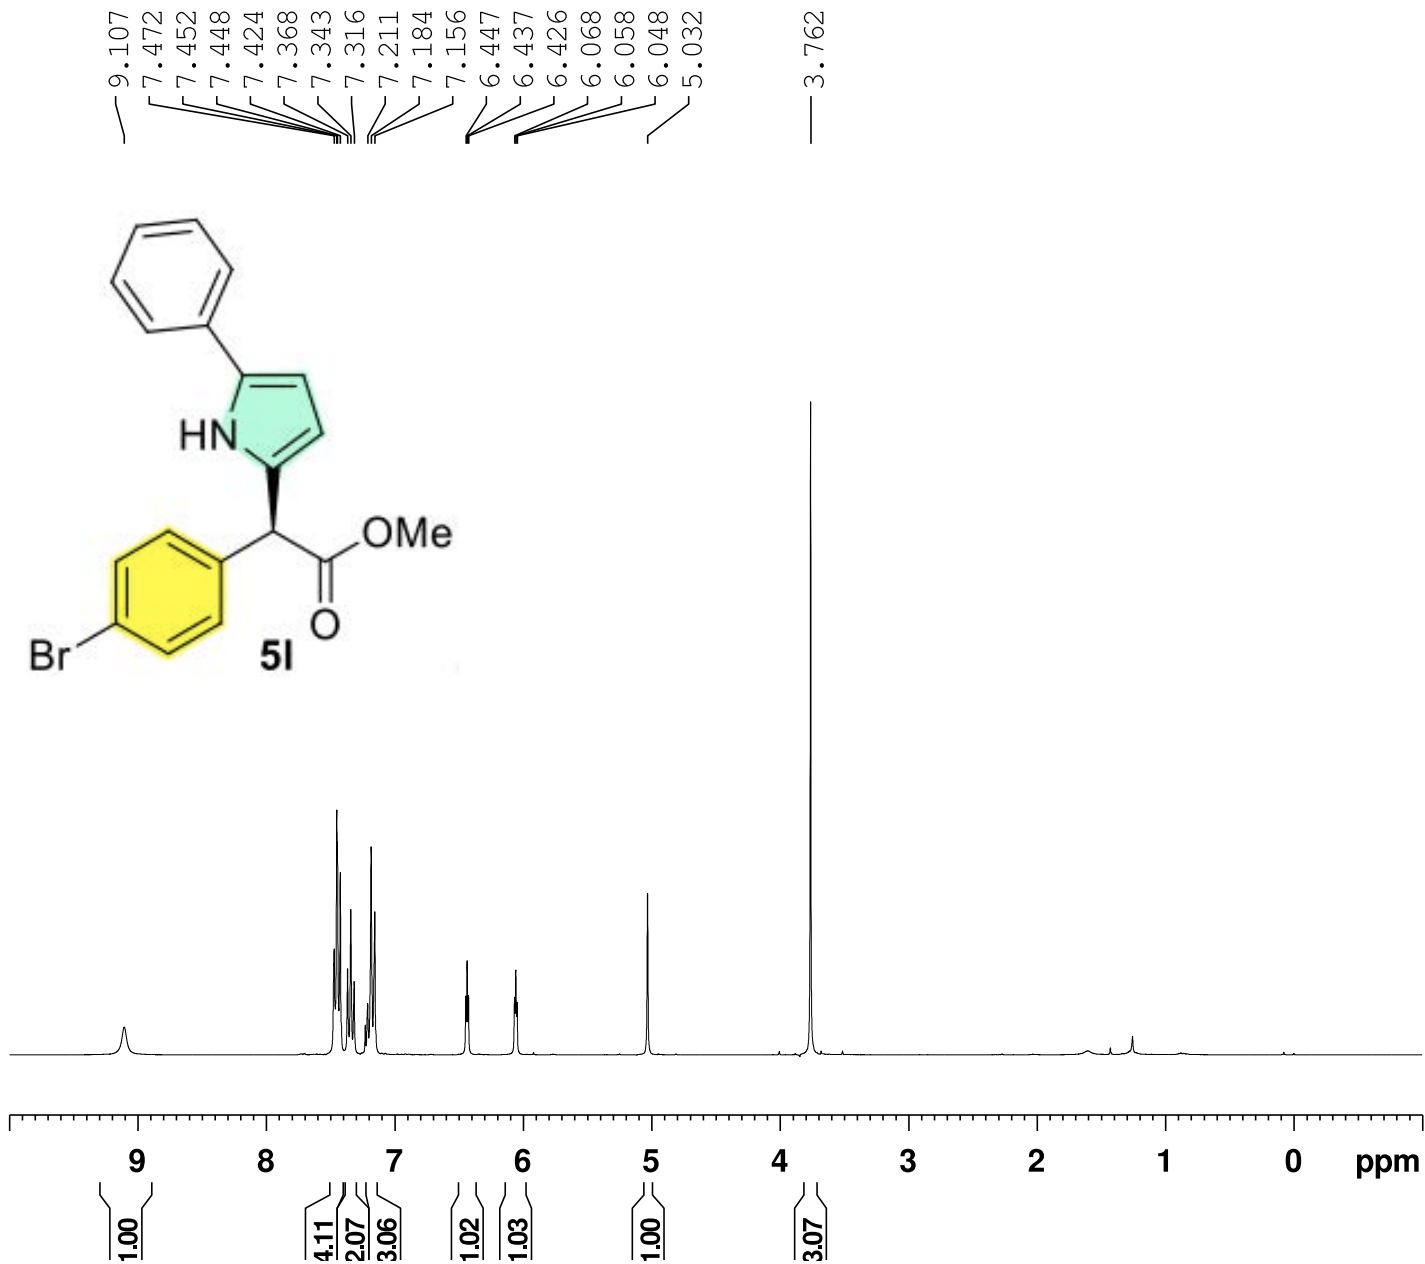





Current Data Parameters  
NAME NMR-YX-7-p67  
EXPNO 2237  
PROCNO 1

F2 - Acquisition Parameters

Date\_ 20231227  
Time 16.50 h  
INSTRUM spect  
PROBHD z104275\_0225 (  
PULPROG zgpg30  
TD 65536  
SOLVENT CDC13  
NS 100  
DS 4  
SWH 18115.941 Hz  
FIDRES 0.552855 Hz  
AQ 1.8087935 sec  
RG 203  
DW 27.600 usec  
DE 6.50 usec  
TE 294.9 K  
D1 2.00000000 sec  
D11 0.03000000 sec  
TD0 1  
SFO1 75.4752953 MHz  
NUC1 13C  
P1 9.50 usec  
PLW1 34.20000076 W  
SFO2 300.1312005 MHz  
NUC2 1H  
CPDPRG[2] waltz16  
PCPD2 90.00 usec  
PLW2 14.00000000 W  
PLW12 0.17284000 W  
PLW13 0.08693700 W

F2 - Processing parameters

SI 32768  
SF 75.4677485 MHz  
WDW EM  
SSB 0  
LB 1.00 Hz  
GB 0  
PC 1.40

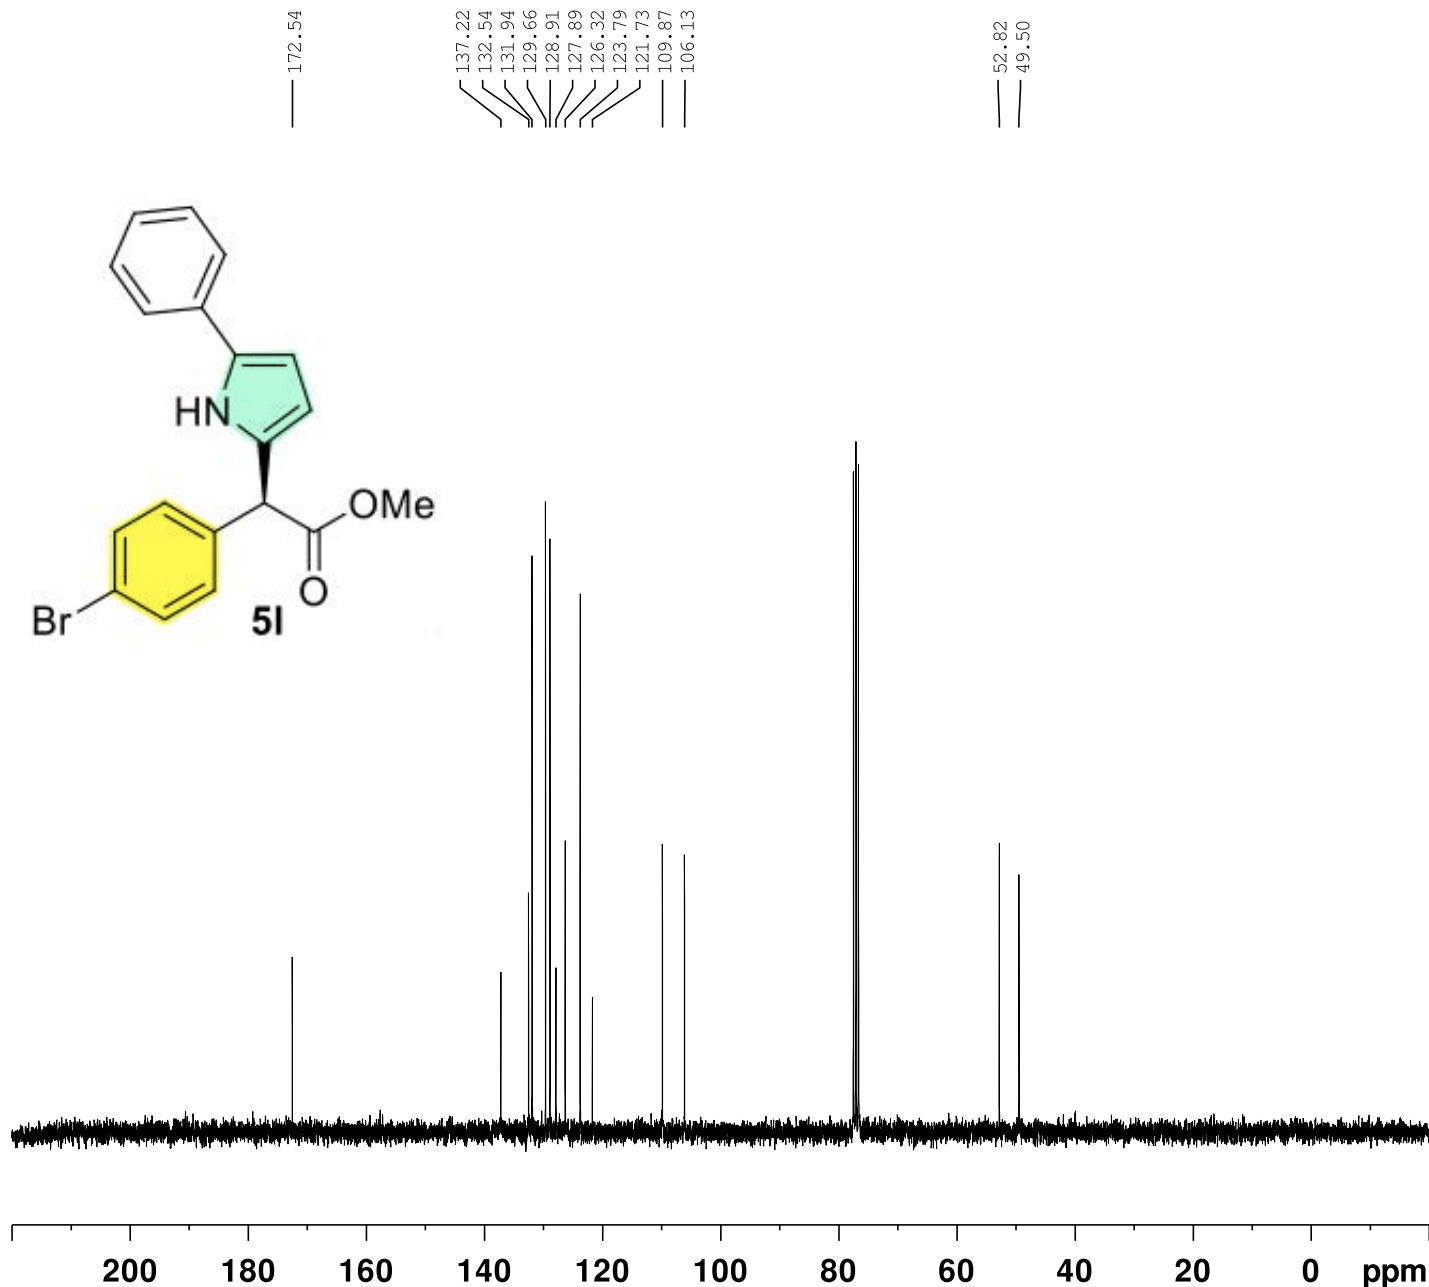



Current Data Parameters  
NAME NMR-YX-7-p68  
EXPNO 2230  
PROCNO 1

F2 - Acquisition Parameters  
Date\_ 20231227  
Time 16.03 h  
INSTRUM spect  
PROBHD Z104275\_0225 (   
PULPROG zg30  
TD 65536  
SOLVENT CDCl3  
NS 16  
DS 2  
SWH 6009.615 Hz  
FIDRES 0.183399 Hz  
AQ 5.4525952 sec  
RG 57  
DW 83.200 usec  
DE 6.50 usec  
TE 294.4 K  
D1 1.00000000 sec  
TD0 1  
SF01 300.1318533 MHz  
NUC1 1H  
P1 10.00 usec  
PLW1 14.00000000 W

F2 - Processing parameters  
SI 65536  
SF 300.1300310 MHz  
WDW EM  
SSB 0  
LB 0.30 Hz  
GB 0  
PC 1.00

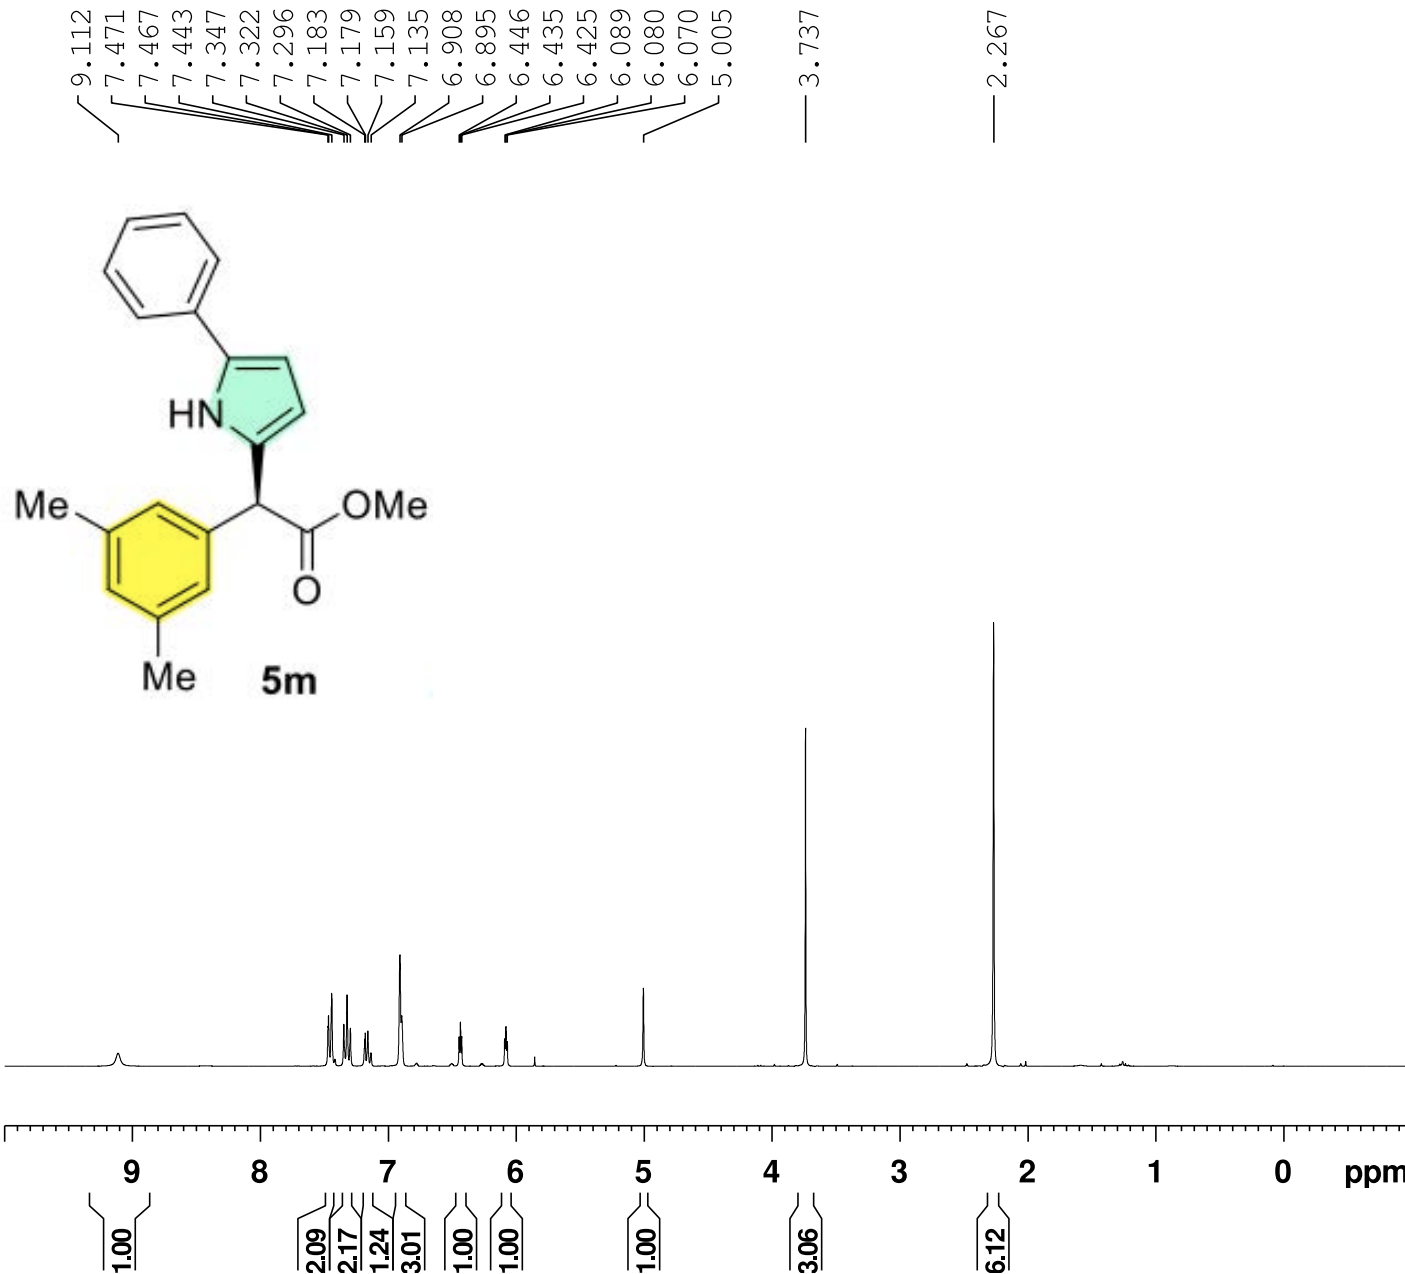



Current Data Parameters  
NAME NMR-YX-7-p68  
EXPNO 2231  
PROCNO 1

F2 - Acquisition Parameters  
Date\_ 20231227  
Time 16.11 h  
INSTRUM spect  
PROBHD z104275\_0225 (   
PULPROG zgpg30  
TD 65536  
SOLVENT CDC13  
NS 100  
DS 4  
SWH 18115.941 Hz  
FIDRES 0.552855 Hz  
AQ 1.8087935 sec  
RG 203  
DW 27.600 usec  
DE 6.50 usec  
TE 294.9 K  
D1 2.00000000 sec  
D11 0.03000000 sec  
TD0 1  
SFO1 75.4752953 MHz  
NUC1 13C  
P1 9.50 usec  
PLW1 34.20000076 W  
SFO2 300.1312005 MHz  
NUC2 1H  
CPDPRG[2] waltz16  
PCPD2 90.00 usec  
PLW2 14.00000000 W  
PLW12 0.17284000 W  
PLW13 0.08693700 W

F2 - Processing parameters  
SI 32768  
SF 75.4677485 MHz  
WDW EM  
SSB 0  
LB 1.00 Hz  
GB 0  
PC 1.40

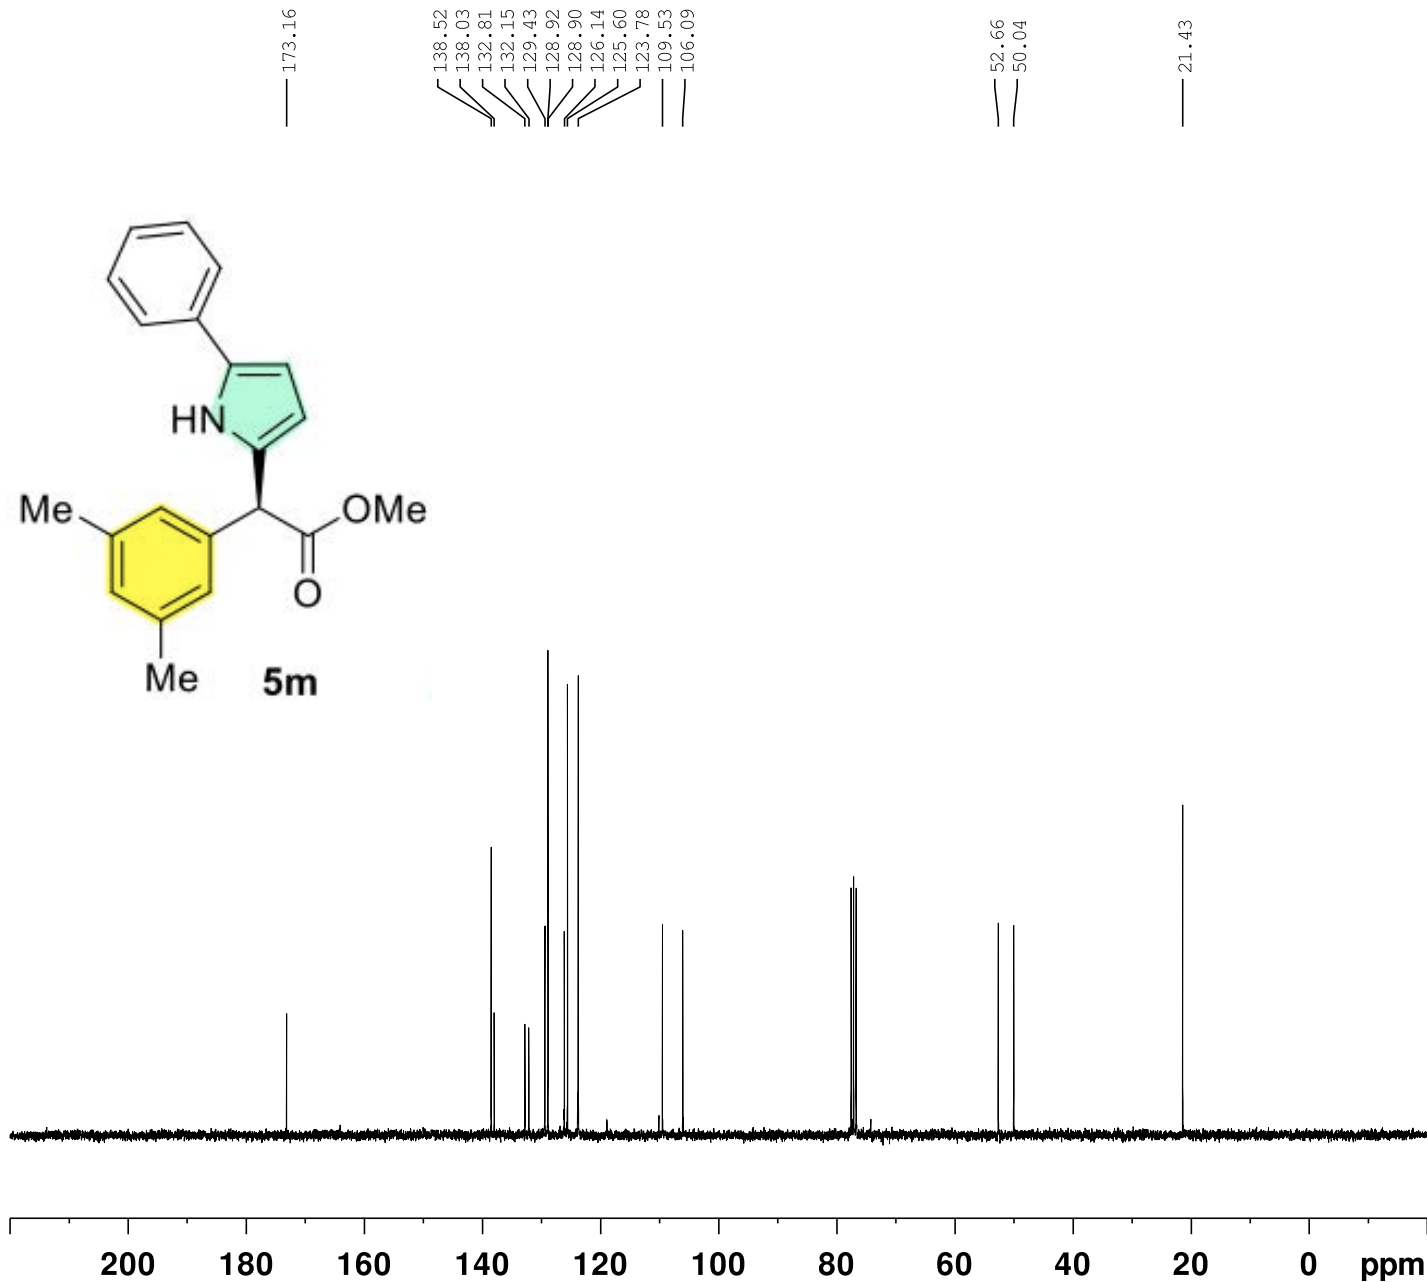



Current Data Parameters  
NAME NMR-YX-7-p66  
EXPNO 2234  
PROCNO 1

F2 - Acquisition Parameters

Date\_ 20231227  
Time 16.30 h  
INSTRUM spect  
PROBHD Z104275\_0225 (  
PULPROG zg30  
TD 65536  
SOLVENT CDCl3  
NS 16  
DS 2  
SWH 6009.615 Hz  
FIDRES 0.183399 Hz  
AQ 5.4525952 sec  
RG 71.8  
DW 83.200 usec  
DE 6.50 usec  
TE 294.4 K  
D1 1.00000000 sec  
TD0 1  
SF01 300.1318533 MHz  
NUC1 1H  
P1 10.00 usec  
PLW1 14.00000000 W

F2 - Processing parameters

SI 65536  
SF 300.1300309 MHz  
WDW EM  
SSB 0  
LB 0.30 Hz  
GB 0  
PC 1.00

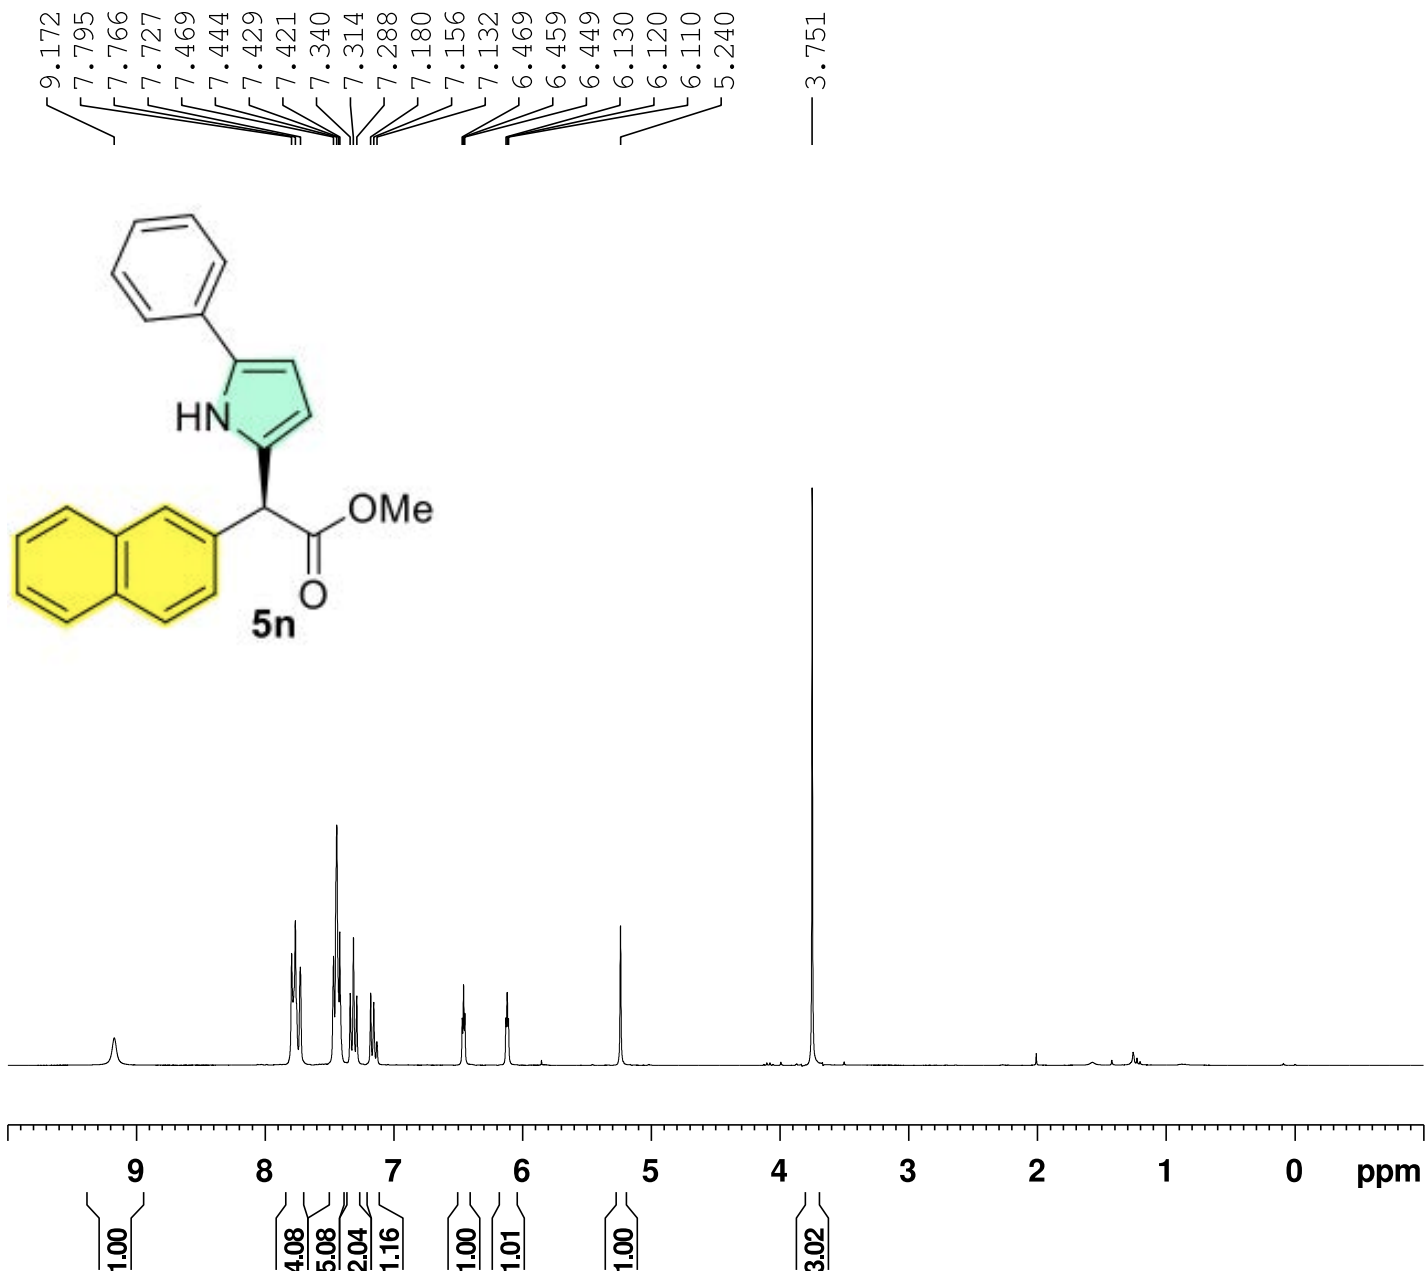



Current Data Parameters  
NAME NMR-YX-7-p66  
EXPNO 2235  
PROCNO 1

F2 - Acquisition Parameters  
Date\_ 20231227  
Time 16.38 h  
INSTRUM spect  
PROBHD z104275\_0225 (zpgg30)  
PULPROG zgpg30  
TD 65536  
SOLVENT CDC13  
NS 100  
DS 4  
SWH 18115.941 Hz  
FIDRES 0.552855 Hz  
AQ 1.8087935 sec  
RG 203  
DW 27.600 usec  
DE 6.50 usec  
TE 294.9 K  
D1 2.00000000 sec  
D11 0.03000000 sec  
TD0 1  
SFO1 75.4752953 MHz  
NUC1 13C  
P1 9.50 usec  
PLW1 34.20000076 W  
SFO2 300.1312005 MHz  
NUC2 1H  
CPDPRG[2] waltz16  
PCPD2 90.00 usec  
PLW2 14.00000000 W  
PLW12 0.17284000 W  
PLW13 0.08693700 W

F2 - Processing parameters  
SI 32768  
SF 75.4677485 MHz  
WDW EM  
SSB 0  
LB 1.00 Hz  
GB 0  
PC 1.40

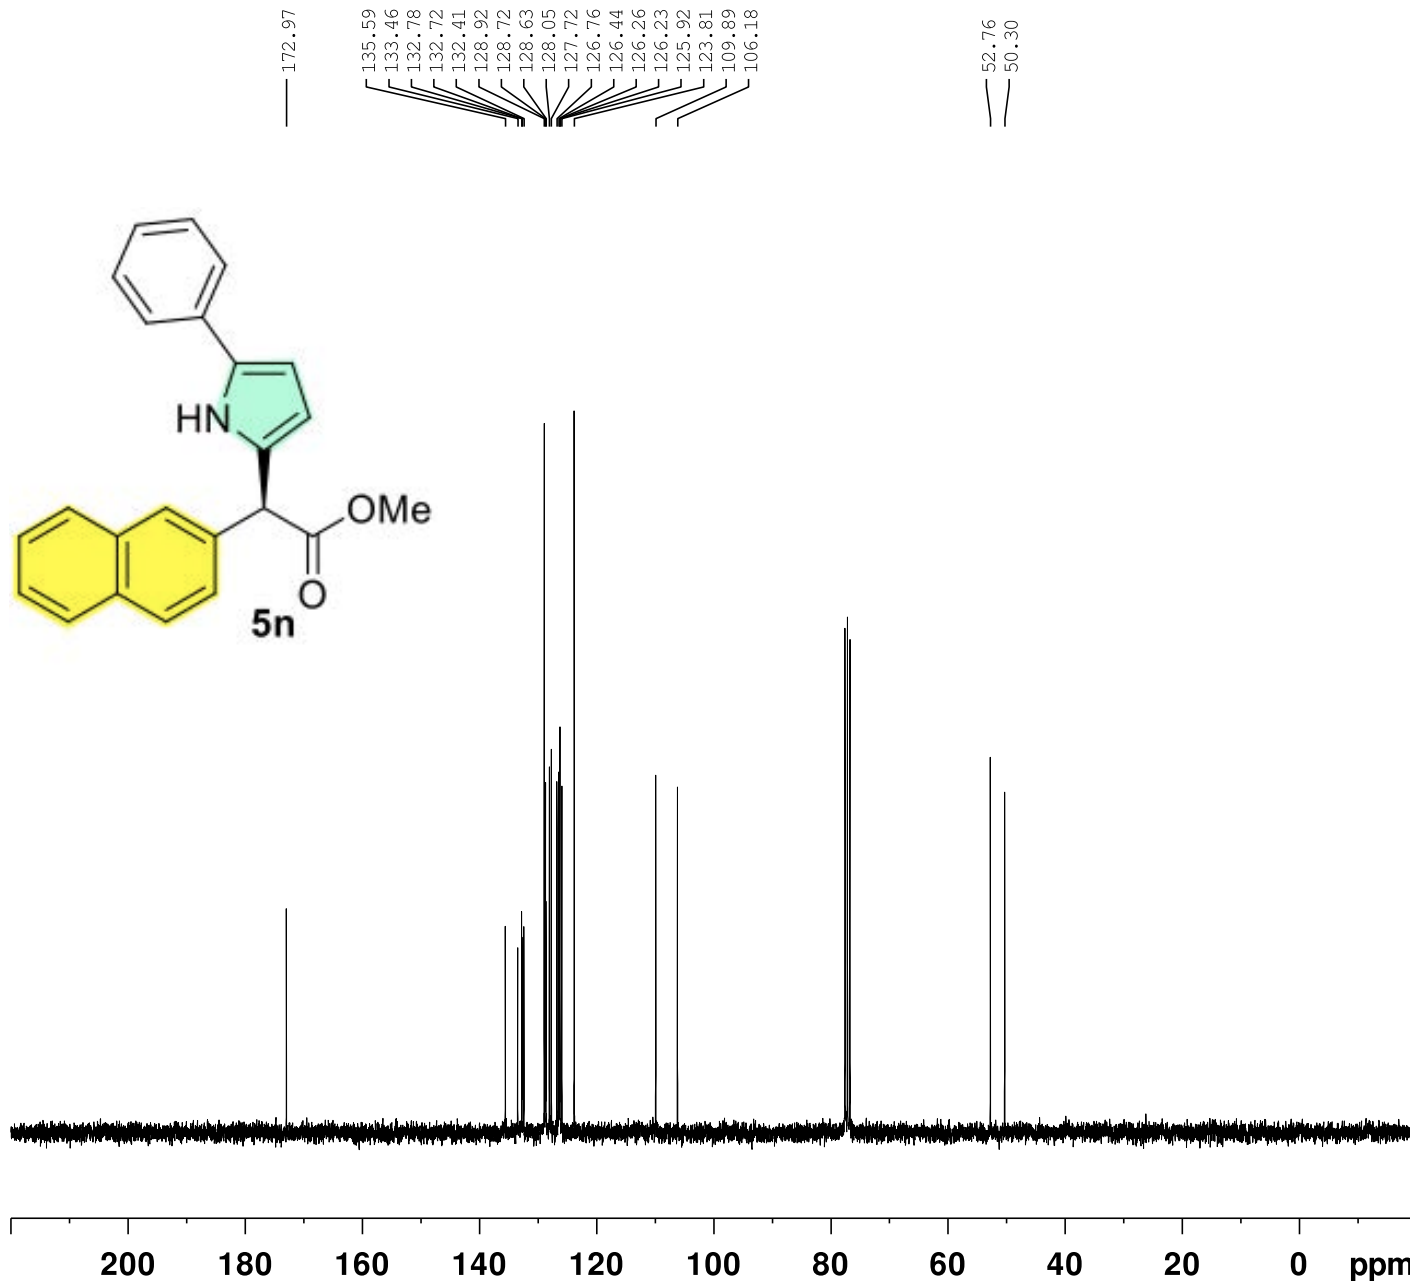

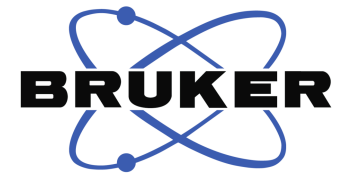

Current Data Parameters  
NAME NMR-YX-7-p62  
EXPNO 2232  
PROCNO 1

F2 - Acquisition Parameters  
Date\_ 20231227  
Time 16.16 h  
INSTRUM spect  
PROBHD Z104275\_0225 (   
PULPROG zg30  
TD 65536  
SOLVENT CDCl3  
NS 16  
DS 2  
SWH 6009.615 Hz  
FIDRES 0.183399 Hz  
AQ 5.4525952 sec  
RG 90.5  
DW 83.200 usec  
DE 6.50 usec  
TE 294.4 K  
D1 1.00000000 sec  
TD0 1  
SF01 300.1318533 MHz  
NUC1 1H  
P1 10.00 usec  
PLW1 14.00000000 W

F2 - Processing parameters  
SI 65536  
SF 300.1300000 MHz  
WDW EM  
SSB 0  
LB 0.30 Hz  
GB 0  
PC 1.00

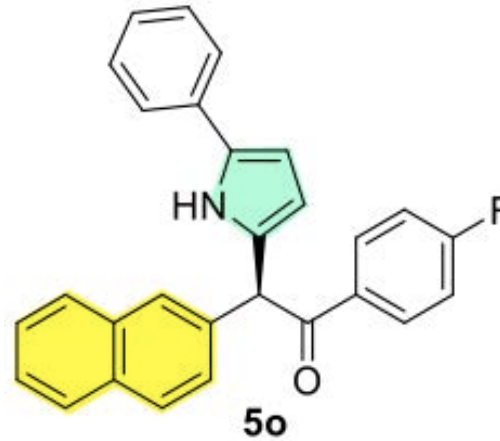

7.941  
7.914  
7.890  
7.676  
7.654  
7.623  
7.593  
7.557  
7.531  
7.422  
7.398  
7.373  
7.358  
7.283  
7.265  
7.240  
7.217  
7.077  
7.048  
7.020  
6.531  
6.351  
6.252

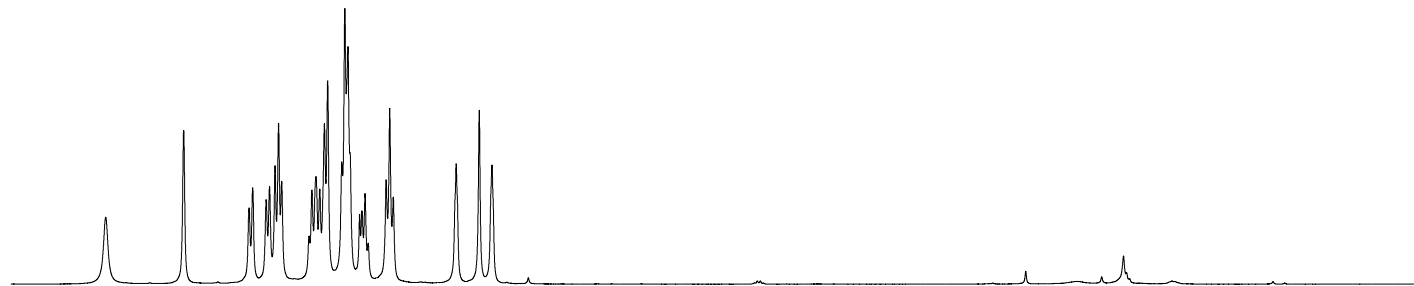

9 8 7 6 5 4 3 2 1 0 ppm

1.03  
1.02  
1.06  
3.14  
4.05  
4.09  
1.11  
2.13  
1.03  
1.03  
1.00



Current Data Parameters  
NAME NMR-YX-7-p62  
EXPNO 2233  
PROCNO 1

F2 - Acquisition Parameters  
Date\_ 20231227  
Time 16.24 h  
INSTRUM spect  
PROBHD z104275\_0225 (zgpg30)  
PULPROG zgpg30  
TD 65536  
SOLVENT CDCl3  
NS 100  
DS 4  
SWH 18115.941 Hz  
FIDRES 0.552855 Hz  
AQ 1.8087935 sec  
RG 203  
DW 27.600 usec  
DE 6.50 usec  
TE 294.9 K  
D1 2.00000000 sec  
D11 0.03000000 sec  
TD0 1  
SFO1 75.4752953 MHz  
NUC1 13C  
P1 9.50 usec  
PLW1 34.20000076 W  
SFO2 300.1312005 MHz  
NUC2 1H  
CPDPRG[2] waltz16  
PCPD2 90.00 usec  
PLW2 14.00000000 W  
PLW12 0.17284000 W  
PLW13 0.08693700 W

F2 - Processing parameters  
SI 32768  
SF 75.4677485 MHz  
WDW EM  
SSB 0  
LB 1.00 Hz  
GB 0  
PC 1.40

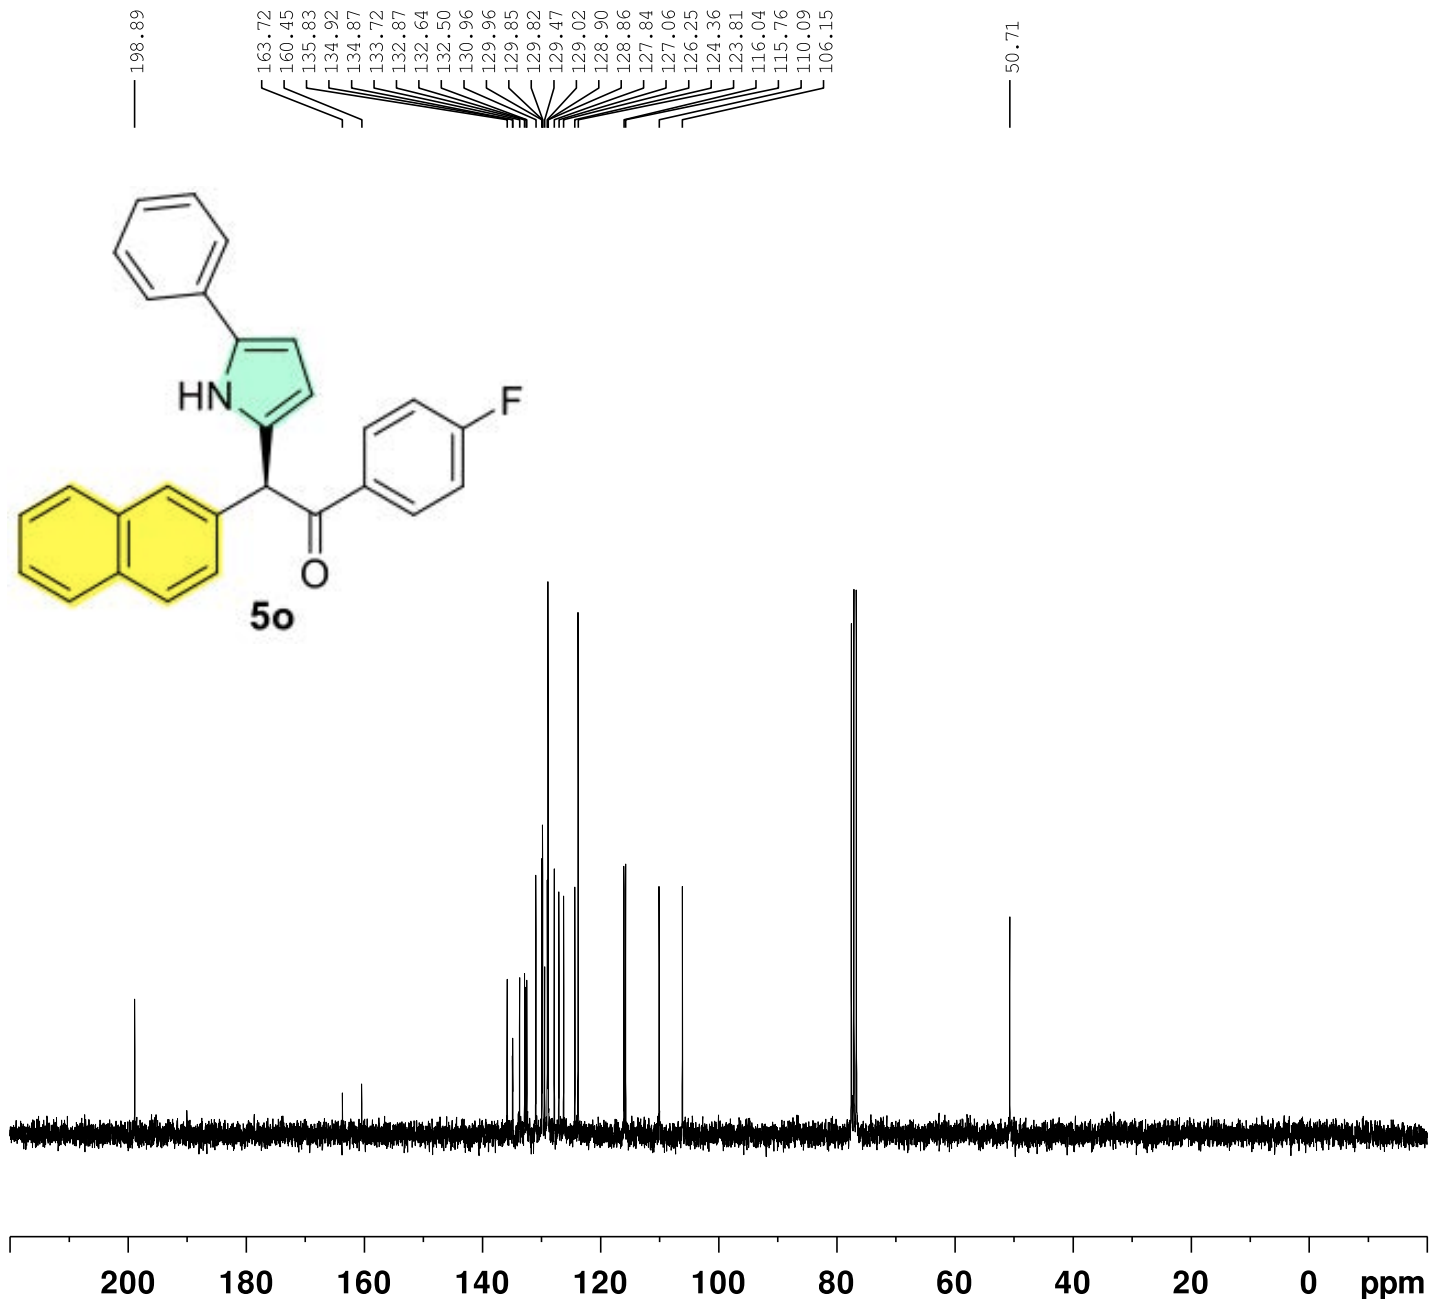



Current Data Parameters  
NAME NMR-YX-7-p62  
EXPNO 2239  
PROCNO 1

F2 - Acquisition Parameters  
Date\_ 20231227  
Time 20.22 h  
INSTRUM spect  
PROBHD z104275\_0225 (  
PULPROG zgfhigqn.2  
TD 131072  
SOLVENT CDCl3  
NS 16  
DS 4  
SWH 66964.289 Hz  
FIDRES 1.021794 Hz  
AQ 0.9786710 sec  
RG 203  
DW 7.467 usec  
DE 6.50 usec  
TE 293.7 K  
D1 1.00000000 sec  
D11 0.03000000 sec  
D12 0.00002000 sec  
TD0 1  
SFO1 282.3761148 MHz  
NUC1 19F  
P1 14.50 usec  
PLW1 10.39999962 W  
SFO2 300.1312005 MHz  
NUC2 1H  
CPDPRG[2] waltz16  
PCPD2 90.00 usec  
PLW2 14.00000000 W  
PLW12 0.17284000 W

F2 - Processing parameters  
SI 65536  
SF 282.4043552 MHz  
WDW EM  
SSB 0  
LB 0.30 Hz  
GB 0  
PC 1.00

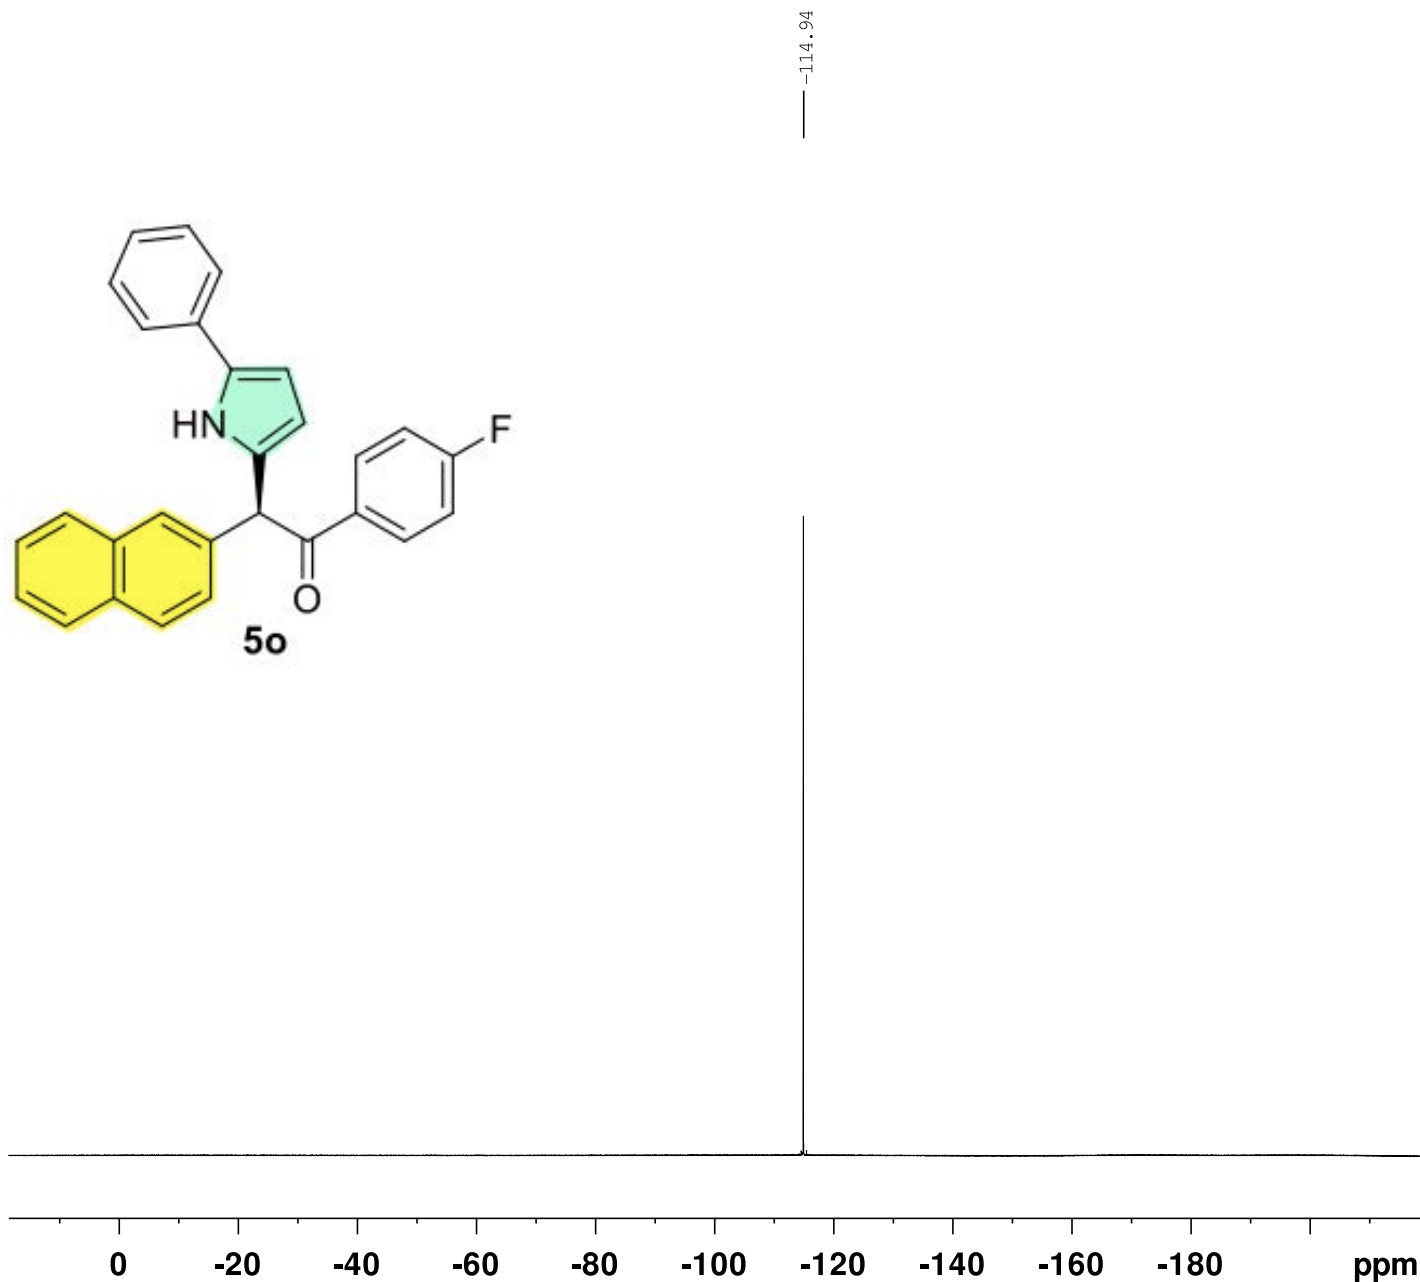





Current Data Parameters  
NAME HNMR-YX-5-p87  
EXPNO 150  
PROCNO 1

F2 - Acquisition Parameters  
Date\_ 20231008  
Time 15.14  
INSTRUM spect  
PROBHD 5 mm PADUL 13C  
PULPROG zg30  
TD 65536  
SOLVENT CDCl3  
NS 4  
DS 2  
SWH 8223.685 Hz  
FIDRES 0.125483 Hz  
AQ 3.9845889 sec  
RG 61.19  
DW 60.800 usec  
DE 6.50 usec  
TE 293.9 K  
D1 1.00000000 sec  
TD0 1

=====  
CHANNEL f1  
NUC1 1H  
P1 9.90 usec  
PLW1 23.00000000 W  
SFO1 400.1924713 MHz

F2 - Processing parameters  
SI 65536  
SF 400.1900647 MHz  
WDW EM  
SSB 0  
LB 0.30 Hz  
GB 0  
PC 1.00

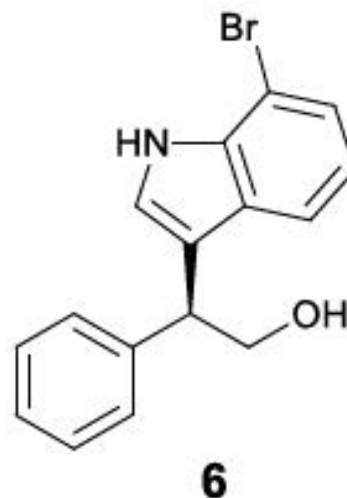

8.271  
7.256  
7.236  
7.228  
7.205  
7.194  
7.144  
7.133  
7.123  
7.111  
7.033  
7.028  
6.823  
6.803  
6.784  
4.340  
4.323  
4.306  
4.123  
4.107  
4.096  
4.080  
4.056  
4.038  
4.029  
4.011  
— 1.706

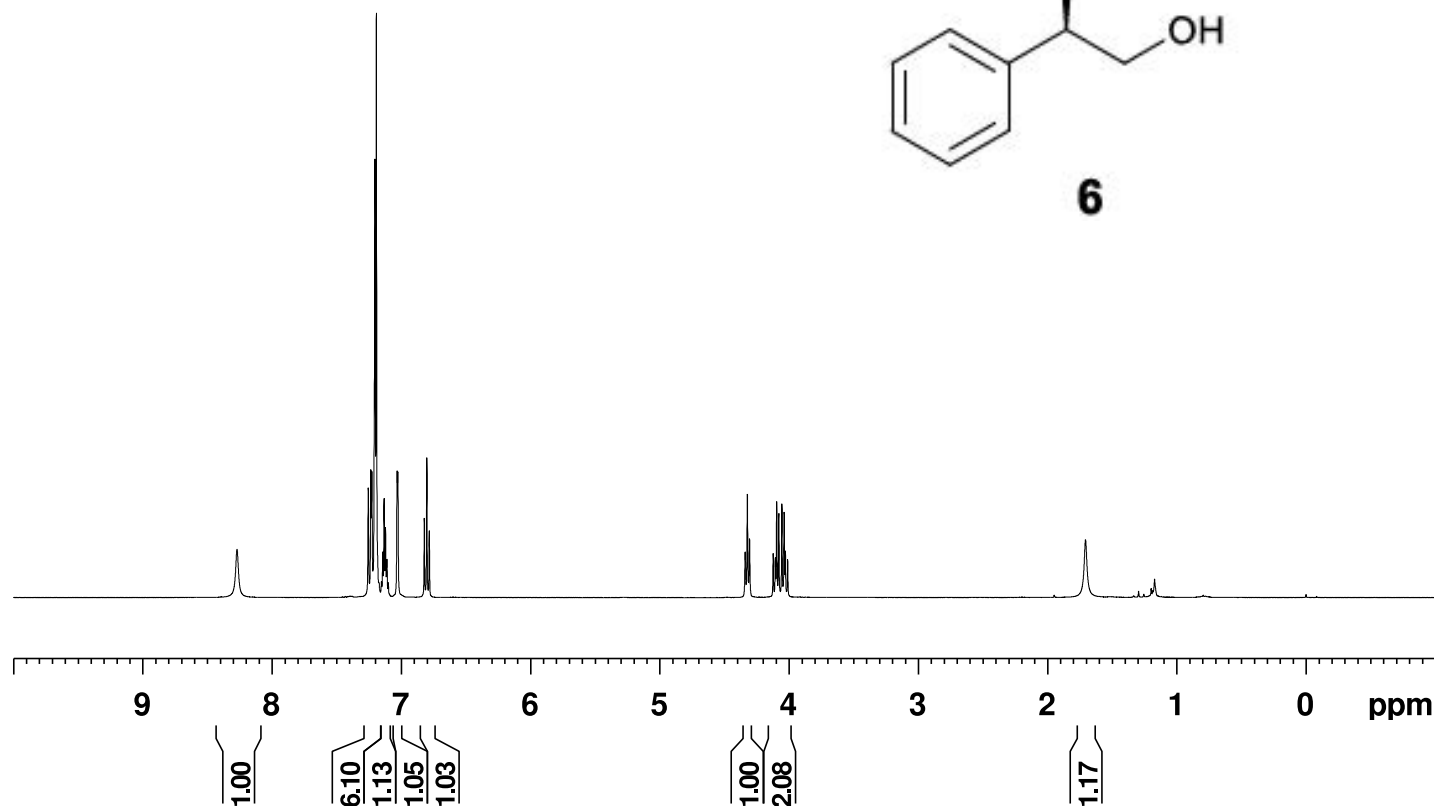



Current Data Parameters  
NAME CNMR-YX-5-p87  
EXPNO 151  
PROCNO 1

F2 - Acquisition Parameters  
Date\_ 20231008  
Time 15.21  
INSTRUM spect  
PROBHD 5 mm PADUL 13C  
PULPROG zgpg30  
TD 65536  
SOLVENT CDC13  
NS 100  
DS 4  
SWH 24038.461 Hz  
FIDRES 0.366798 Hz  
AQ 1.3631488 sec  
RG 29.75  
DW 20.800 usec  
DE 6.50 usec  
TE 294.2 K  
D1 2.00000000 sec  
D11 0.03000000 sec  
TD0 1

==== CHANNEL f1 =====  
NUC1 13C  
P1 9.80 usec  
PLW1 47.4000153 W  
SFO1 100.6379178 MHz

==== CHANNEL f2 =====  
CPDPRG[2] waltz16  
NUC2 1H  
PCPD2 90.00 usec  
PLW2 23.0000000 W  
PLW12 0.30712000 W  
PLW13 0.24877000 W  
SFO2 400.1916008 MHz

F2 - Processing parameters  
SI 32768  
SF 100.6278560 MHz  
WDW EM  
SSB 0  
LB 1.00 Hz  
GB 0  
PC 1.40

141.31  
135.15  
128.75  
128.34  
128.28  
126.96  
124.66  
122.55  
120.77  
118.71  
117.36  
104.85

66.42

45.71

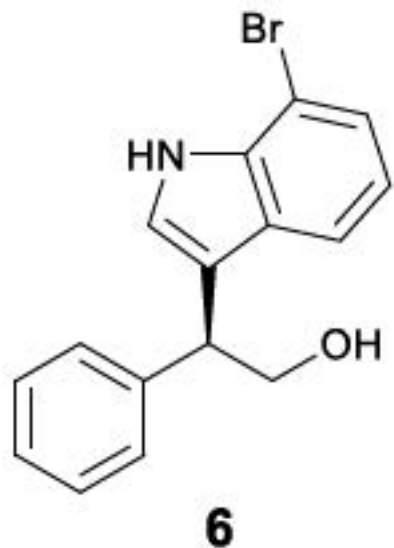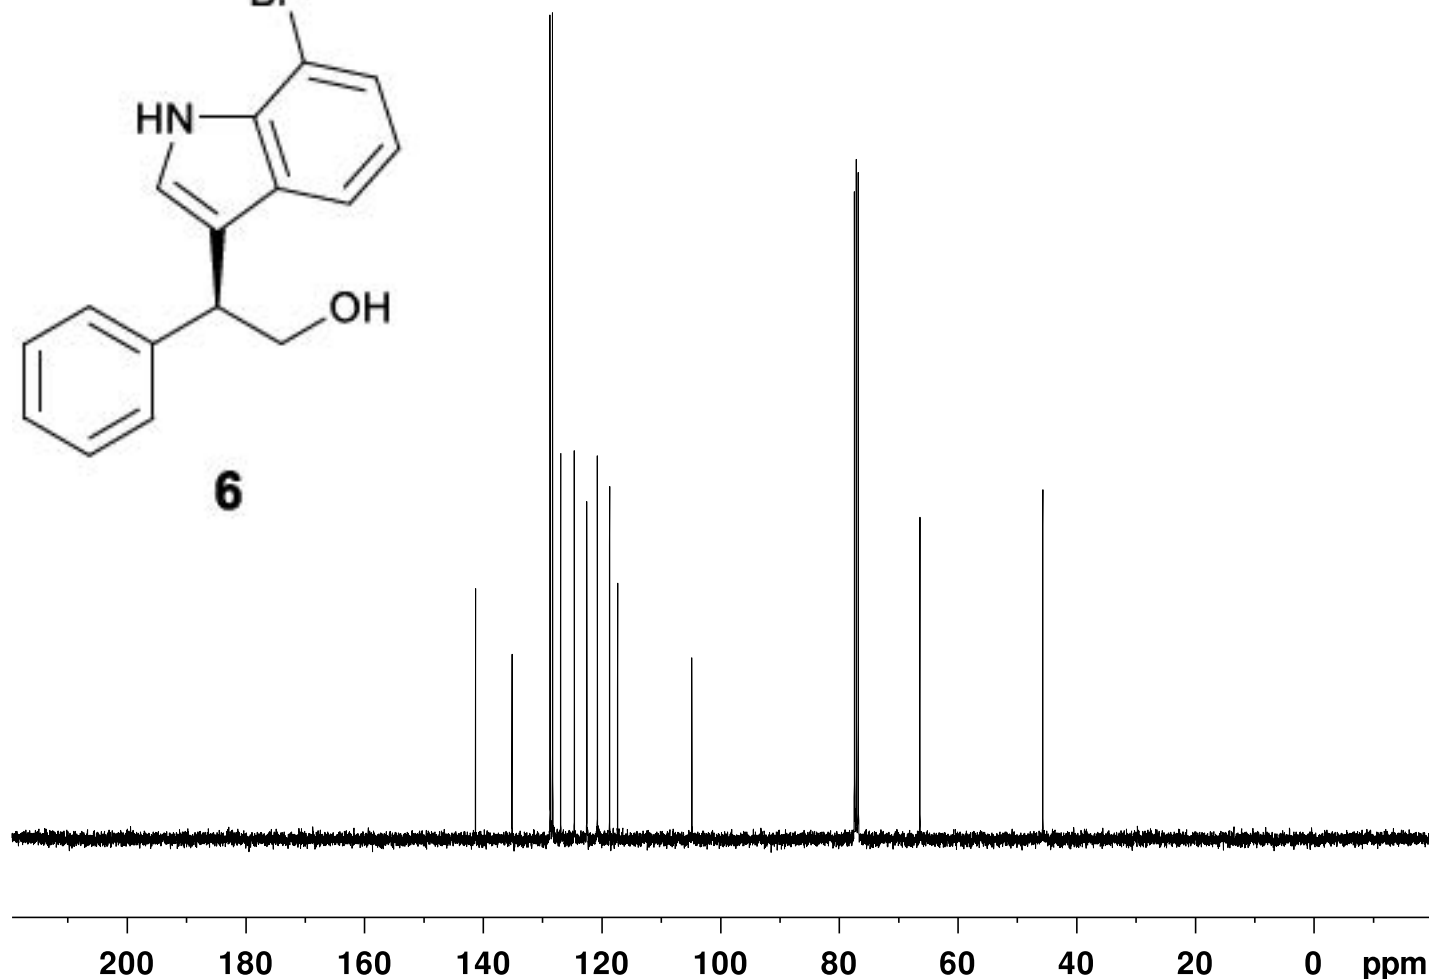



Current Data Parameters  
NAME HNMR-YX-7-p42  
EXPNO 51  
PROCNO 1

F2 - Acquisition Parameters  
Date\_ 20231114  
Time 16.00  
INSTRUM spect  
PROBHD 5 mm PADUL 13C  
PULPROG zg30  
TD 65536  
SOLVENT CD2Cl2  
NS 4  
DS 2  
SWH 8223.685 Hz  
FIDRES 0.125483 Hz  
AQ 3.9845889 sec  
RG 75.43  
DW 60.800 usec  
DE 6.50 usec  
TE 293.2 K  
D1 1.00000000 sec  
TD0 1

=====  
CHANNEL f1  
NUC1 1H  
P1 9.90 usec  
PLW1 23.00000000 W  
SFO1 400.1924713 MHz

F2 - Processing parameters  
SI 65536  
SF 400.1900326 MHz  
WDW EM  
SSB 0  
LB 0.30 Hz  
GB 0  
PC 1.00

7.574  
7.558  
7.553  
7.285  
7.265  
7.242  
7.224  
7.204  
7.183  
7.163  
7.067  
7.061  
6.859  
6.840  
6.820  
5.300  
4.578  
4.571  
4.562  
4.555  
4.539  
4.524  
4.508  
4.500  
4.491  
4.478  
4.470  
4.466  
4.459  
4.454  
4.443  
2.381

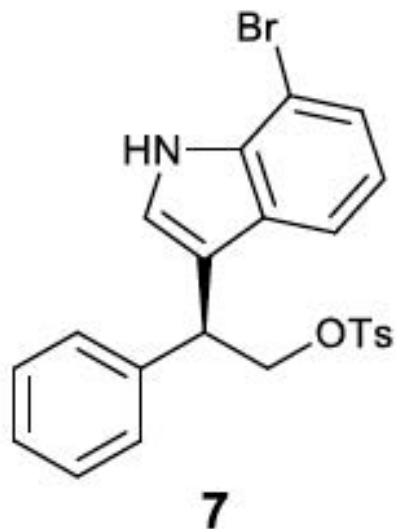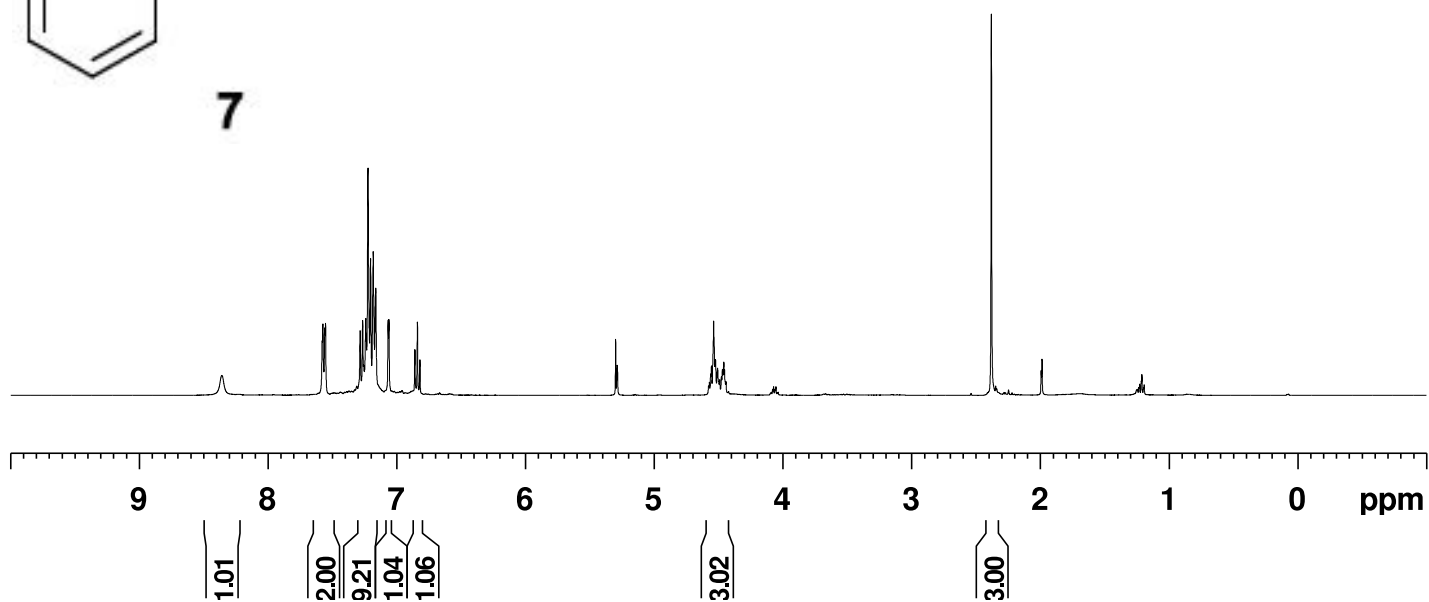



Current Data Parameters  
NAME CNMR-YX-7-p42  
EXPNO 52  
PROCNO 1

F2 - Acquisition Parameters

Date\_ 20231114  
Time 16.06  
INSTRUM spect  
PROBHD 5 mm PADUL 13C  
PULPROG zgpg30  
TD 65536  
SOLVENT CD2Cl2  
NS 83  
DS 4  
SWH 24038.461 Hz  
FIDRES 0.366798 Hz  
AQ 1.3631488 sec  
RG 29.75  
DW 20.800 usec  
DE 6.50 usec  
TE 293.6 K  
D1 2.00000000 sec  
D11 0.03000000 sec  
TD0 1

==== CHANNEL f1 =====

NUC1 13C  
P1 9.80 usec  
PLW1 47.4000153 W  
SFO1 100.6379178 MHz

==== CHANNEL f2 =====

CPDPRG[2] waltz16  
NUC2 1H  
PCPD2 90.00 usec  
PLW2 23.0000000 W  
PLW12 0.30712000 W  
PLW13 0.24877000 W  
SFO2 400.1916008 MHz

F2 - Processing parameters

SI 32768  
SF 100.6278157 MHz  
WDW EM  
SSB 0  
LB 1.00 Hz  
GB 0  
PC 1.40

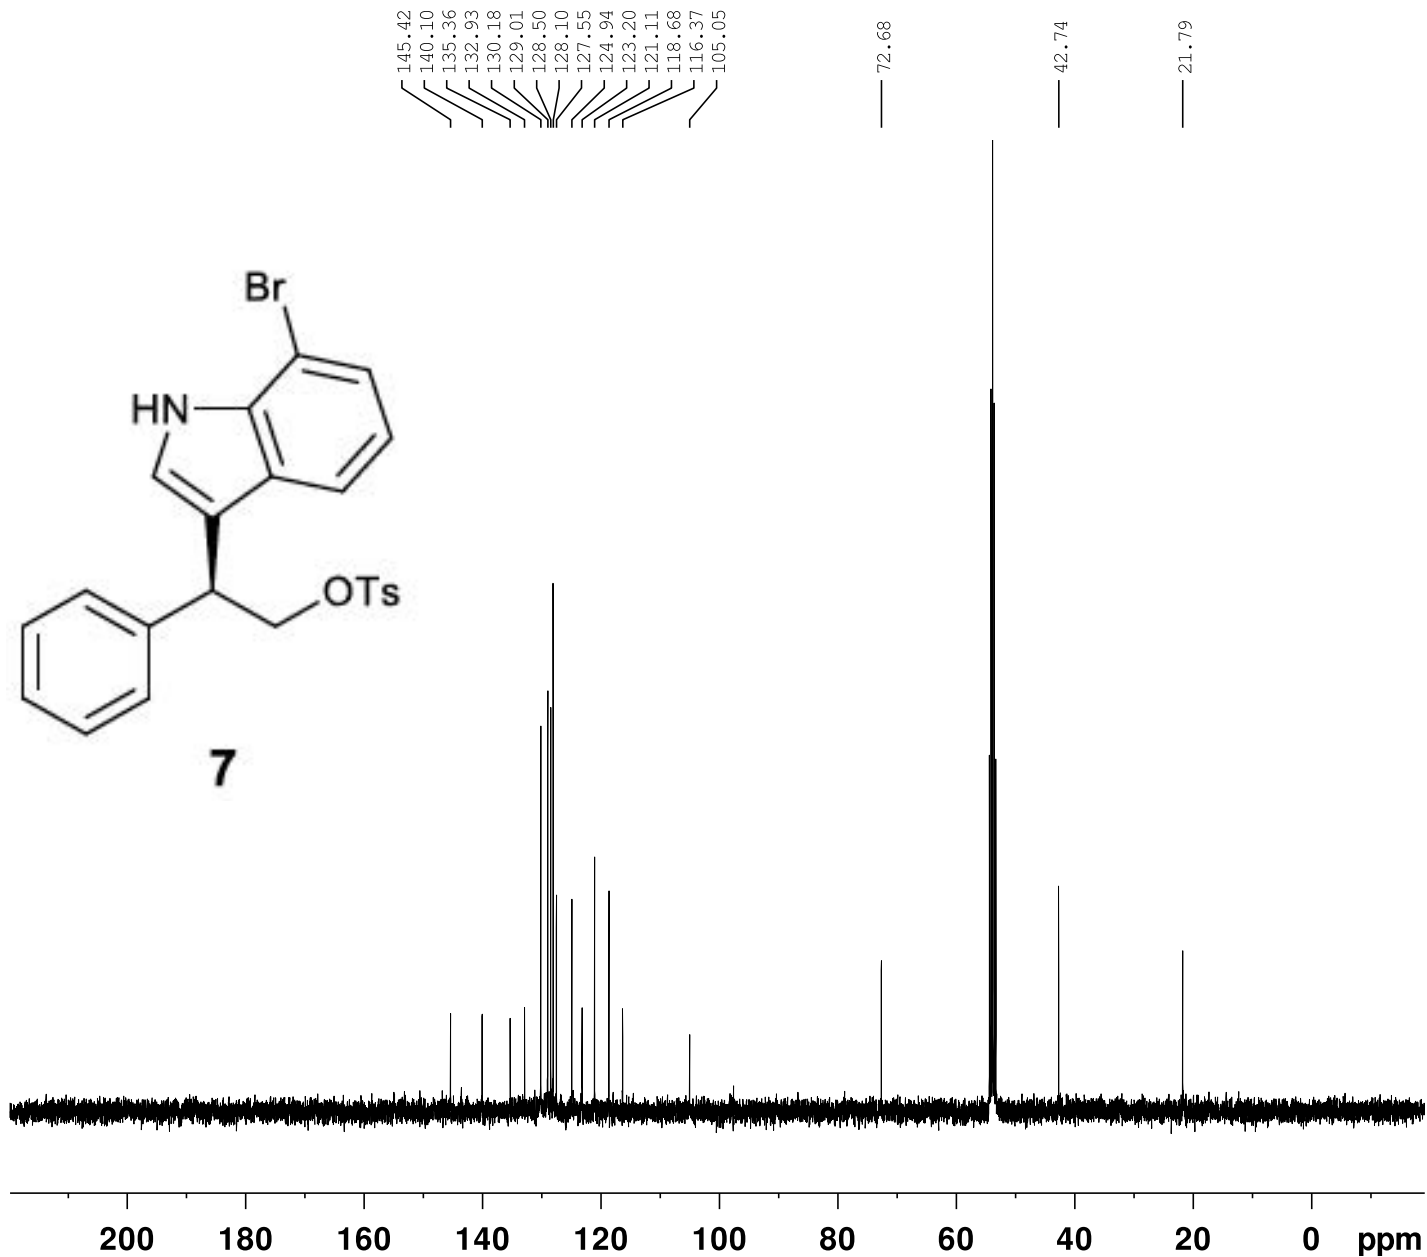



Current Data Parameters  
NAME HNMR-YX-7-p52A  
EXPNO 63  
PROCNO 1

F2 - Acquisition Parameters

Date\_ 20231125  
Time 10.54  
INSTRUM spect  
PROBHD 5 mm PADUL 13C  
PULPROG zg30  
TD 65536  
SOLVENT CDCl3  
NS 4  
DS 2  
SWH 8223.685 Hz  
FIDRES 0.125483 Hz  
AQ 3.9845889 sec  
RG 75.43  
DW 60.800 usec  
DE 6.50 usec  
TE 294.6 K  
D1 1.00000000 sec  
TD0 1

==== CHANNEL f1 =====

NUC1 1H  
P1 9.90 usec  
PLW1 23.00000000 W  
SFO1 400.1924713 MHz

F2 - Processing parameters

SI 65536  
SF 400.1900290 MHz  
WDW EM  
SSB 0  
LB 0.30 Hz  
GB 0  
PC 1.00

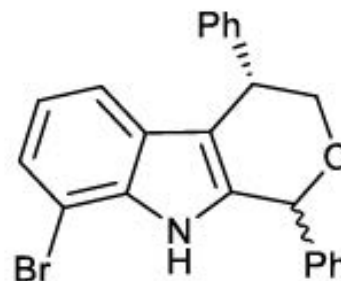

8A

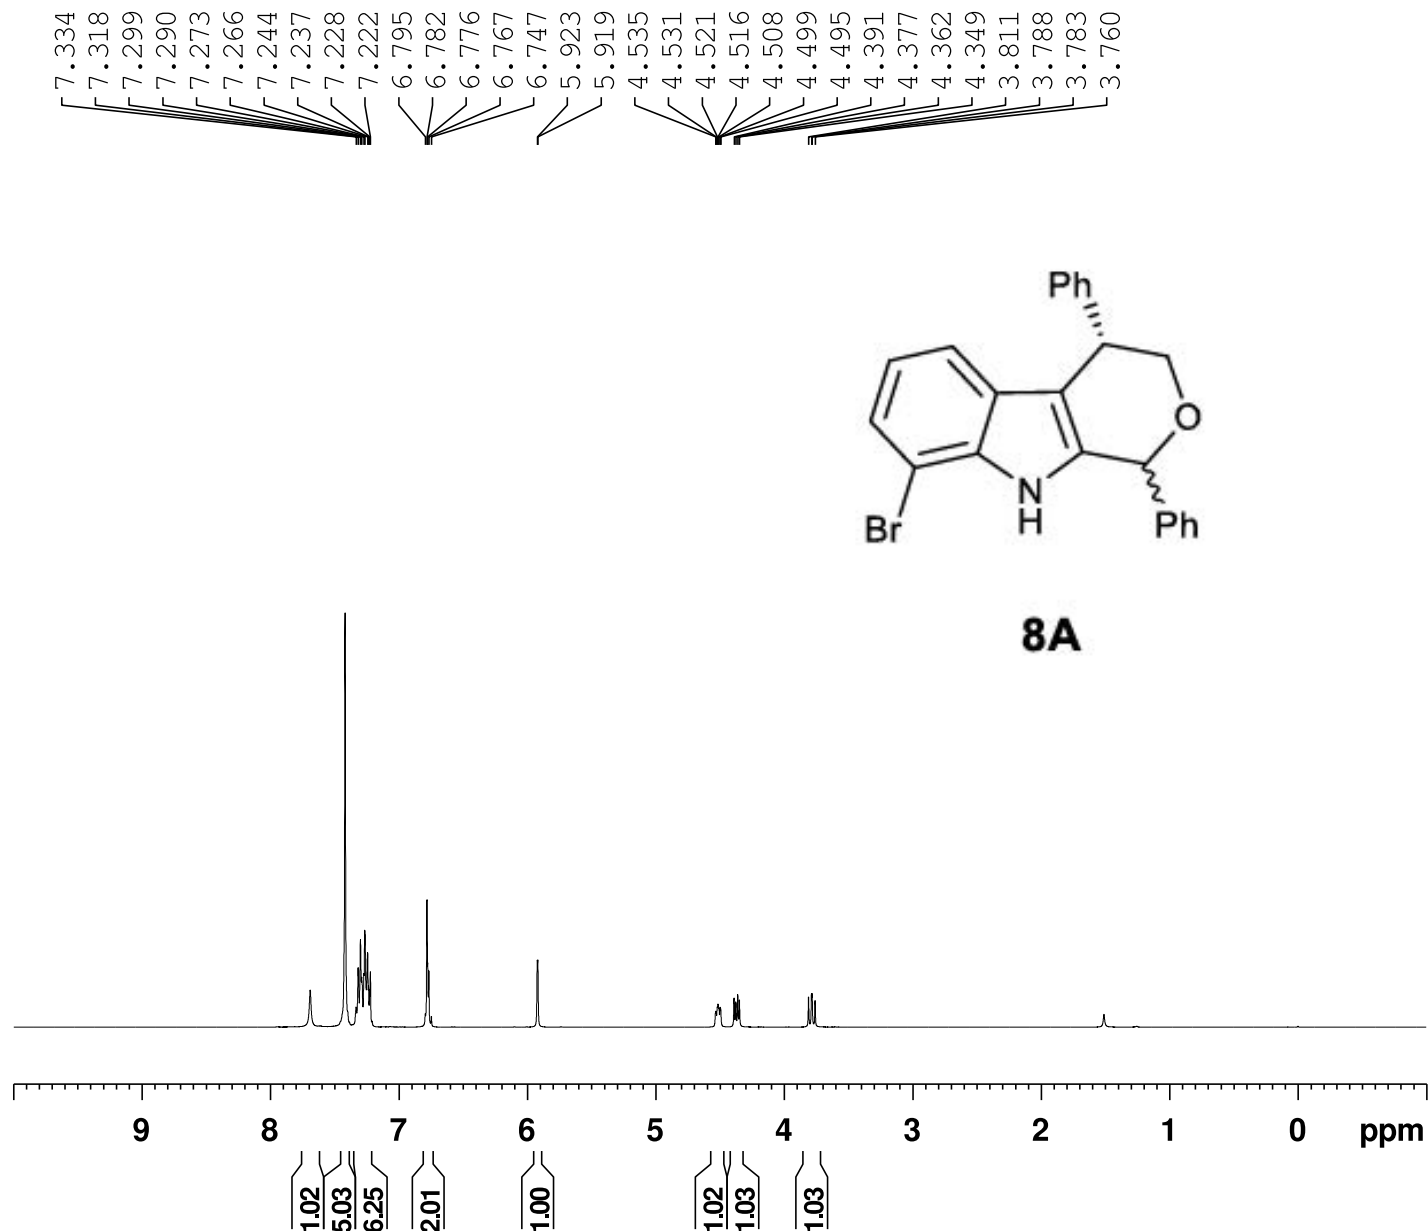



Current Data Parameters  
NAME CNMR-YX-7-p52A  
EXPNO 64  
PROCNO 1

F2 - Acquisition Parameters  
Date\_ 20231125  
Time 10.58  
INSTRUM spect  
PROBHD 5 mm PADUL 13C  
PULPROG zgpg30  
TD 65536  
SOLVENT CDCl3  
NS 50  
DS 4  
SWH 24038.461 Hz  
FIDRES 0.366798 Hz  
AQ 1.3631488 sec  
RG 35.06  
DW 20.800 usec  
DE 6.50 usec  
TE 295.1 K  
D1 2.0000000 sec  
D11 0.0300000 sec  
TD0 1

==== CHANNEL f1 =====  
NUC1 13C  
P1 9.80 usec  
PLW1 47.4000153 W  
SFO1 100.6379178 MHz

==== CHANNEL f2 =====  
CPDPRG[2] waltz16  
NUC2 1H  
PCPD2 90.00 usec  
PLW2 23.0000000 W  
PLW12 0.30712000 W  
PLW13 0.24877000 W  
SFO2 400.1916008 MHz

F2 - Processing parameters  
SI 32768  
SF 100.6278560 MHz  
WDW EM  
SSB 0  
LB 1.00 Hz  
GB 0  
PC 1.40

140.43  
138.72  
135.38  
134.91  
129.34  
129.10  
128.63  
128.55  
127.54  
127.12  
124.34  
120.88  
119.21  
113.01  
104.61

76.41  
72.56

41.27

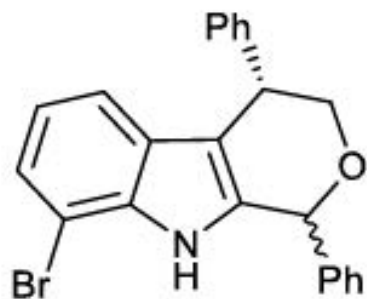

8A

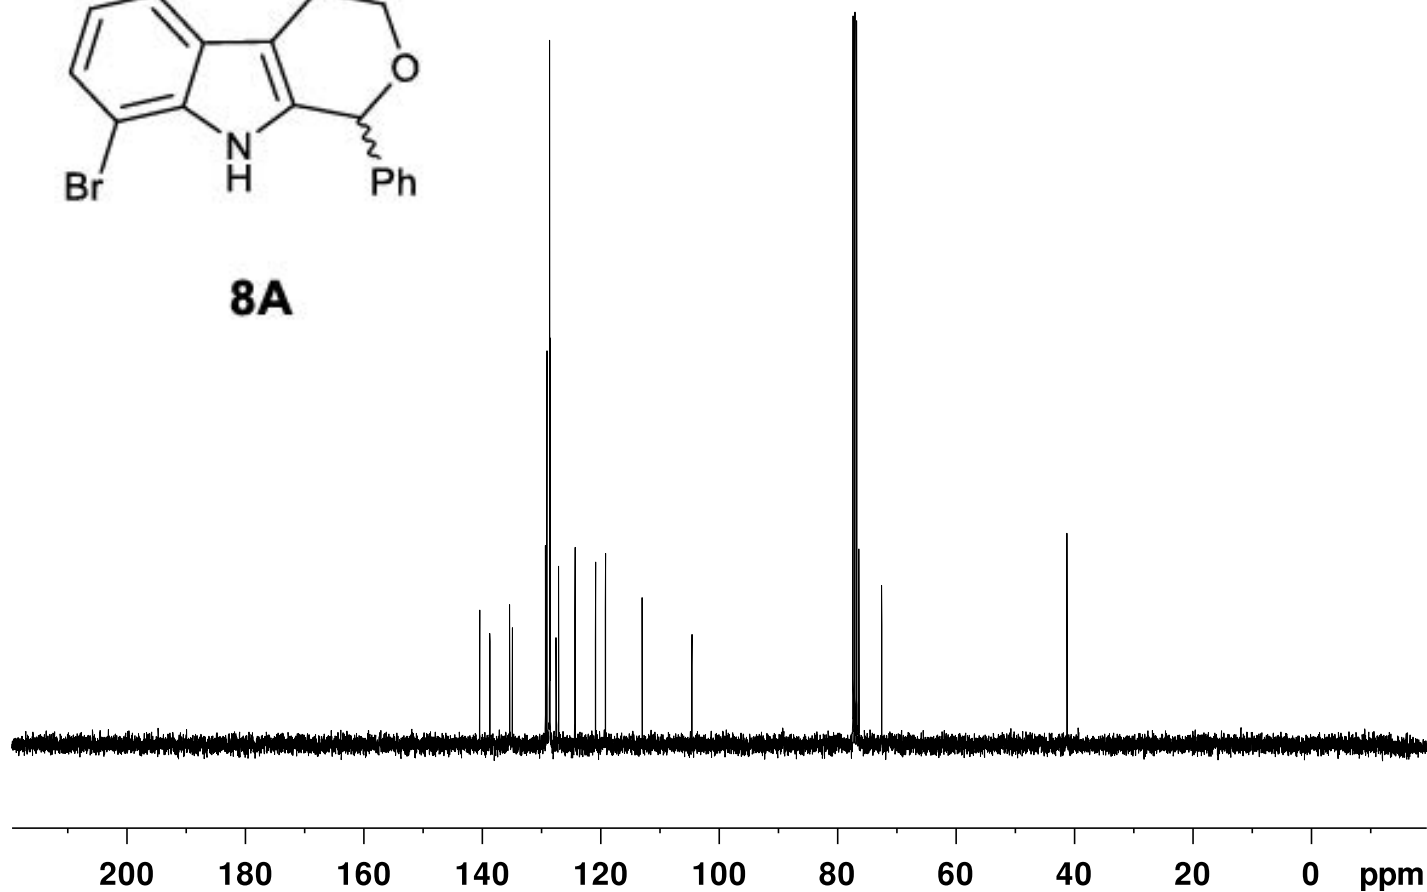



Current Data Parameters  
NAME HNMR-YX-7-p52B  
EXPNO 60  
PROCNO 1

F2 - Acquisition Parameters  
Date\_ 20231125  
Time 10.43  
INSTRUM spect  
PROBHD 5 mm PADUL 13C  
PULPROG zg30  
TD 65536  
SOLVENT CDCl3  
NS 4  
DS 2  
SWH 8223.685 Hz  
FIDRES 0.125483 Hz  
AQ 3.9845889 sec  
RG 50.16  
DW 60.800 usec  
DE 6.50 usec  
TE 294.5 K  
D1 1.00000000 sec  
TD0 1

==== CHANNEL f1 =====  
NUC1 1H  
P1 9.90 usec  
PLW1 23.00000000 W  
SFO1 400.1924713 MHz

F2 - Processing parameters  
SI 65536  
SF 400.1900414 MHz  
WDW EM  
SSB 0  
LB 0.30 Hz  
GB 0  
PC 1.00

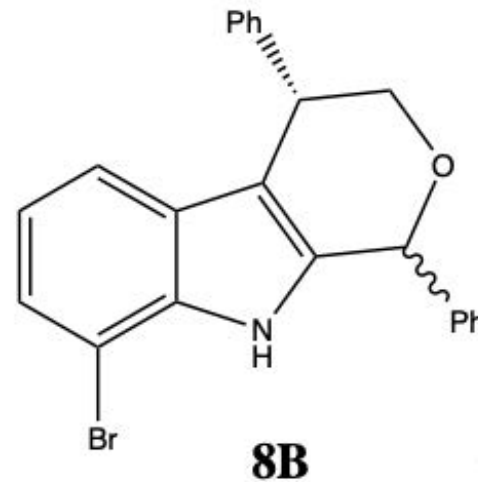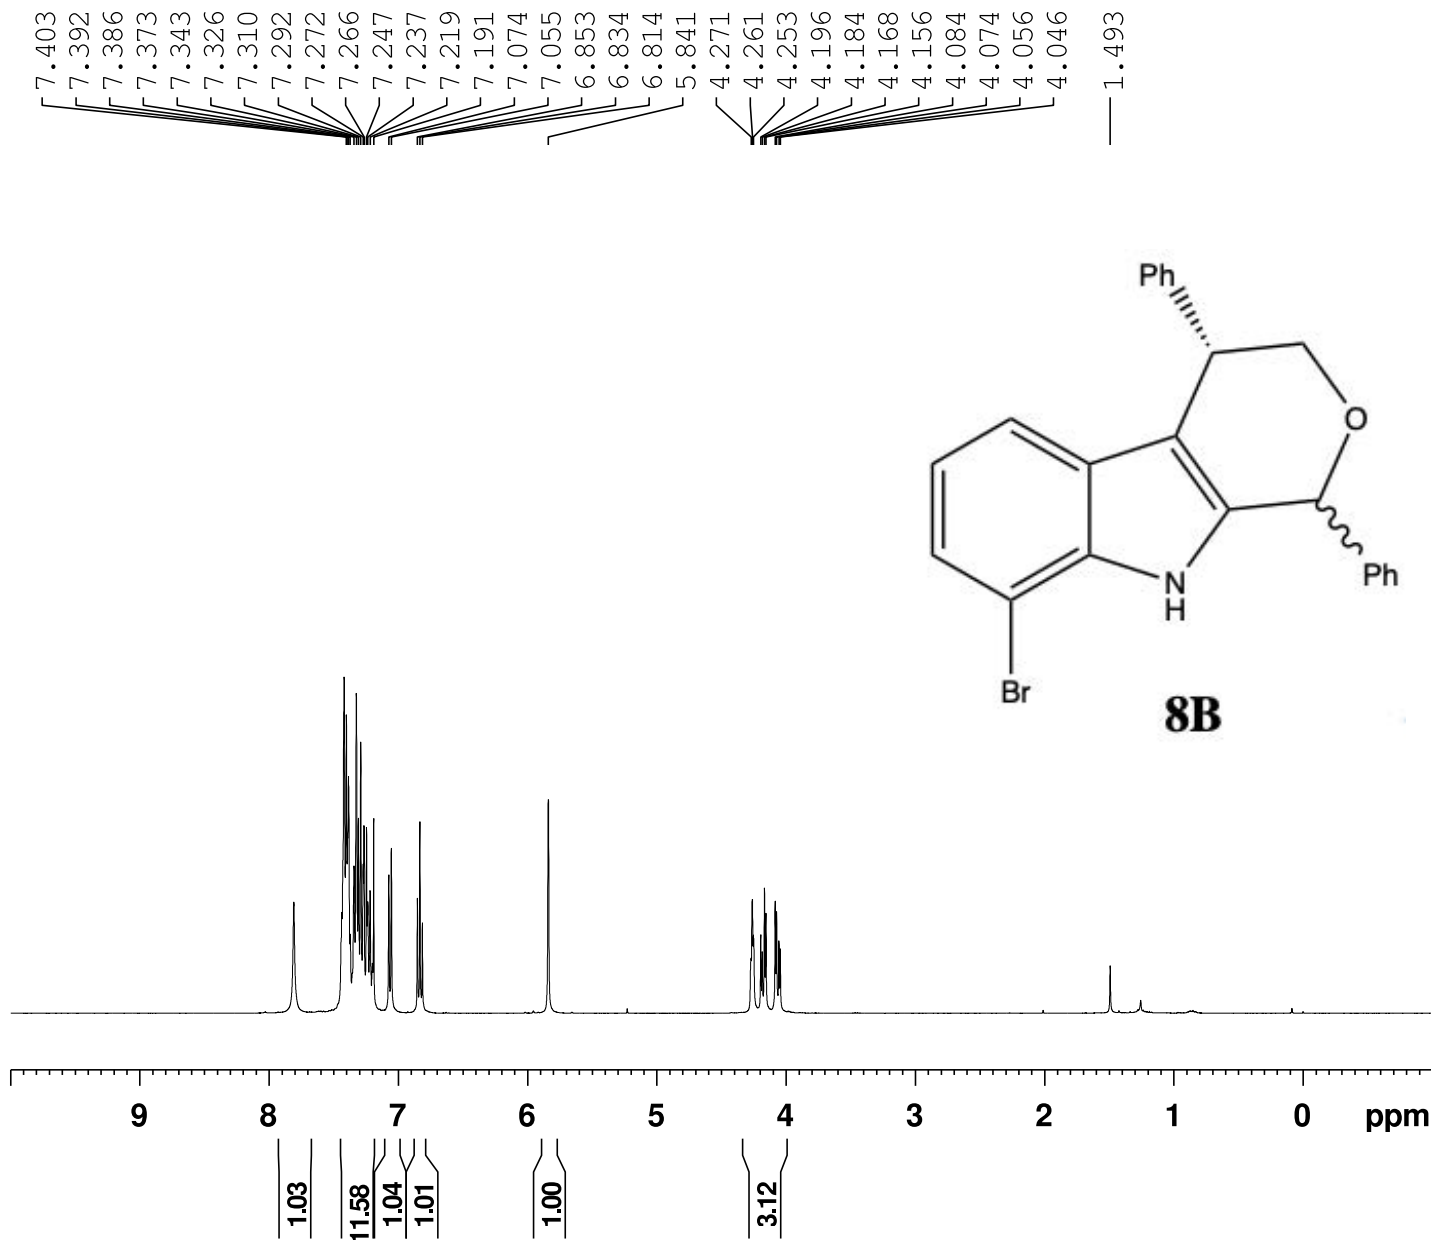



Current Data Parameters  
NAME CNMR-YX-7-p52B  
EXPNO 61  
PROCNO 1

F2 - Acquisition Parameters  
Date\_ 20231125  
Time 10.47  
INSTRUM spect  
PROBHD 5 mm PADUL 13C  
PULPROG zgpg30  
TD 65536  
SOLVENT CDCl3  
NS 50  
DS 4  
SWH 24038.461 Hz  
FIDRES 0.366798 Hz  
AQ 1.3631488 sec  
RG 37.77  
DW 20.800 usec  
DE 6.50 usec  
TE 295.0 K  
D1 2.0000000 sec  
D11 0.0300000 sec  
TD0 1

==== CHANNEL f1 =====  
NUC1 13C  
P1 9.80 usec  
PLW1 47.4000153 W  
SFO1 100.6379178 MHz

==== CHANNEL f2 =====  
CPDPRG[2] waltz16  
NUC2 1H  
PCPD2 90.00 usec  
PLW2 23.0000000 W  
PLW12 0.30712000 W  
PLW13 0.24877000 W  
SFO2 400.1916008 MHz

F2 - Processing parameters  
SI 32768  
SF 100.6278560 MHz  
WDW EM  
SSB 0  
LB 1.00 Hz  
GB 0  
PC 1.40

142.42  
138.85  
135.04  
134.85  
129.23  
129.07  
128.63  
128.58  
128.37  
127.90  
126.84  
124.58  
121.08  
118.66  
112.61  
104.67

75.72  
70.80

40.25

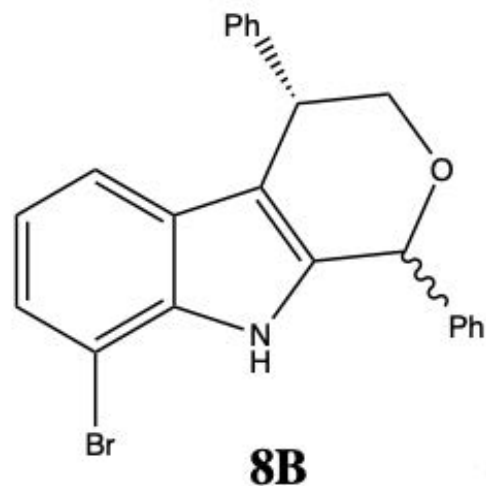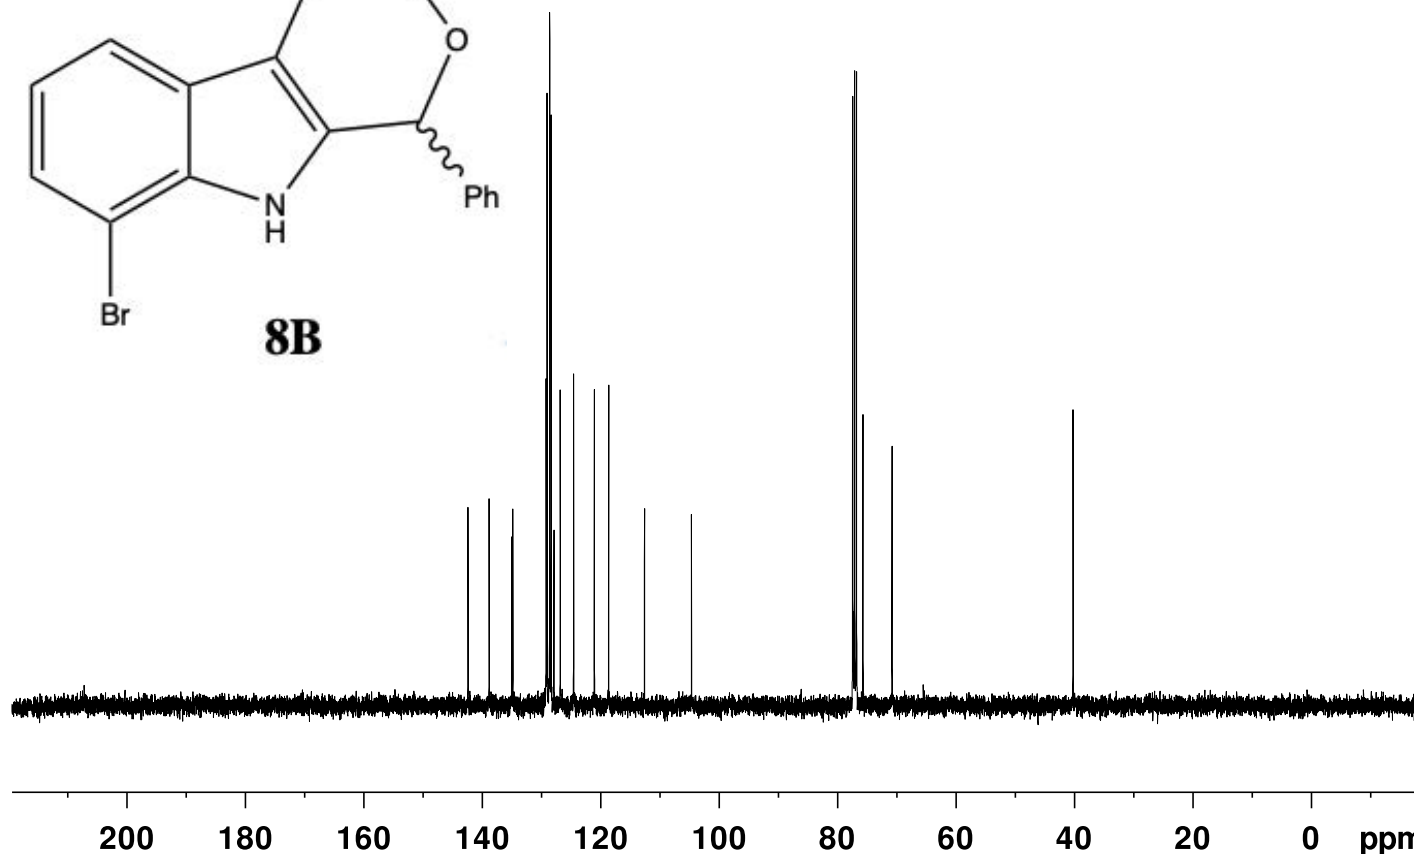





Current Data Parameters  
NAME HNMR-YX-7-p31  
EXPNO 38  
PROCNO 1

F2 - Acquisition Parameters  
Date\_ 20231109  
Time 16.13  
INSTRUM spect  
PROBHD 5 mm PADUL 13C  
PULPROG zg30  
TD 65536  
SOLVENT CDCl3  
NS 4  
DS 2  
SWH 8223.685 Hz  
FIDRES 0.125483 Hz  
AQ 3.9845889 sec  
RG 29.75  
DW 60.800 usec  
DE 6.50 usec  
TE 293.5 K  
D1 1.00000000 sec  
TD0 1

==== CHANNEL f1 =====  
NUC1 1H  
P1 9.90 usec  
PLW1 23.00000000 W  
SFO1 400.1924713 MHz

F2 - Processing parameters  
SI 65536  
SF 400.1900851 MHz  
WDW EM  
SSB 0  
LB 0.30 Hz  
GB 0  
PC 1.00

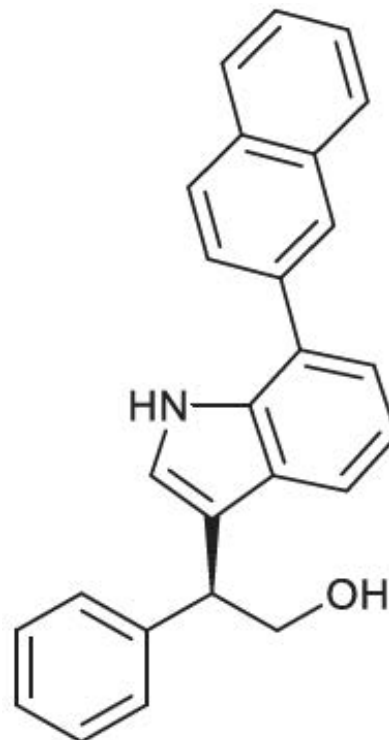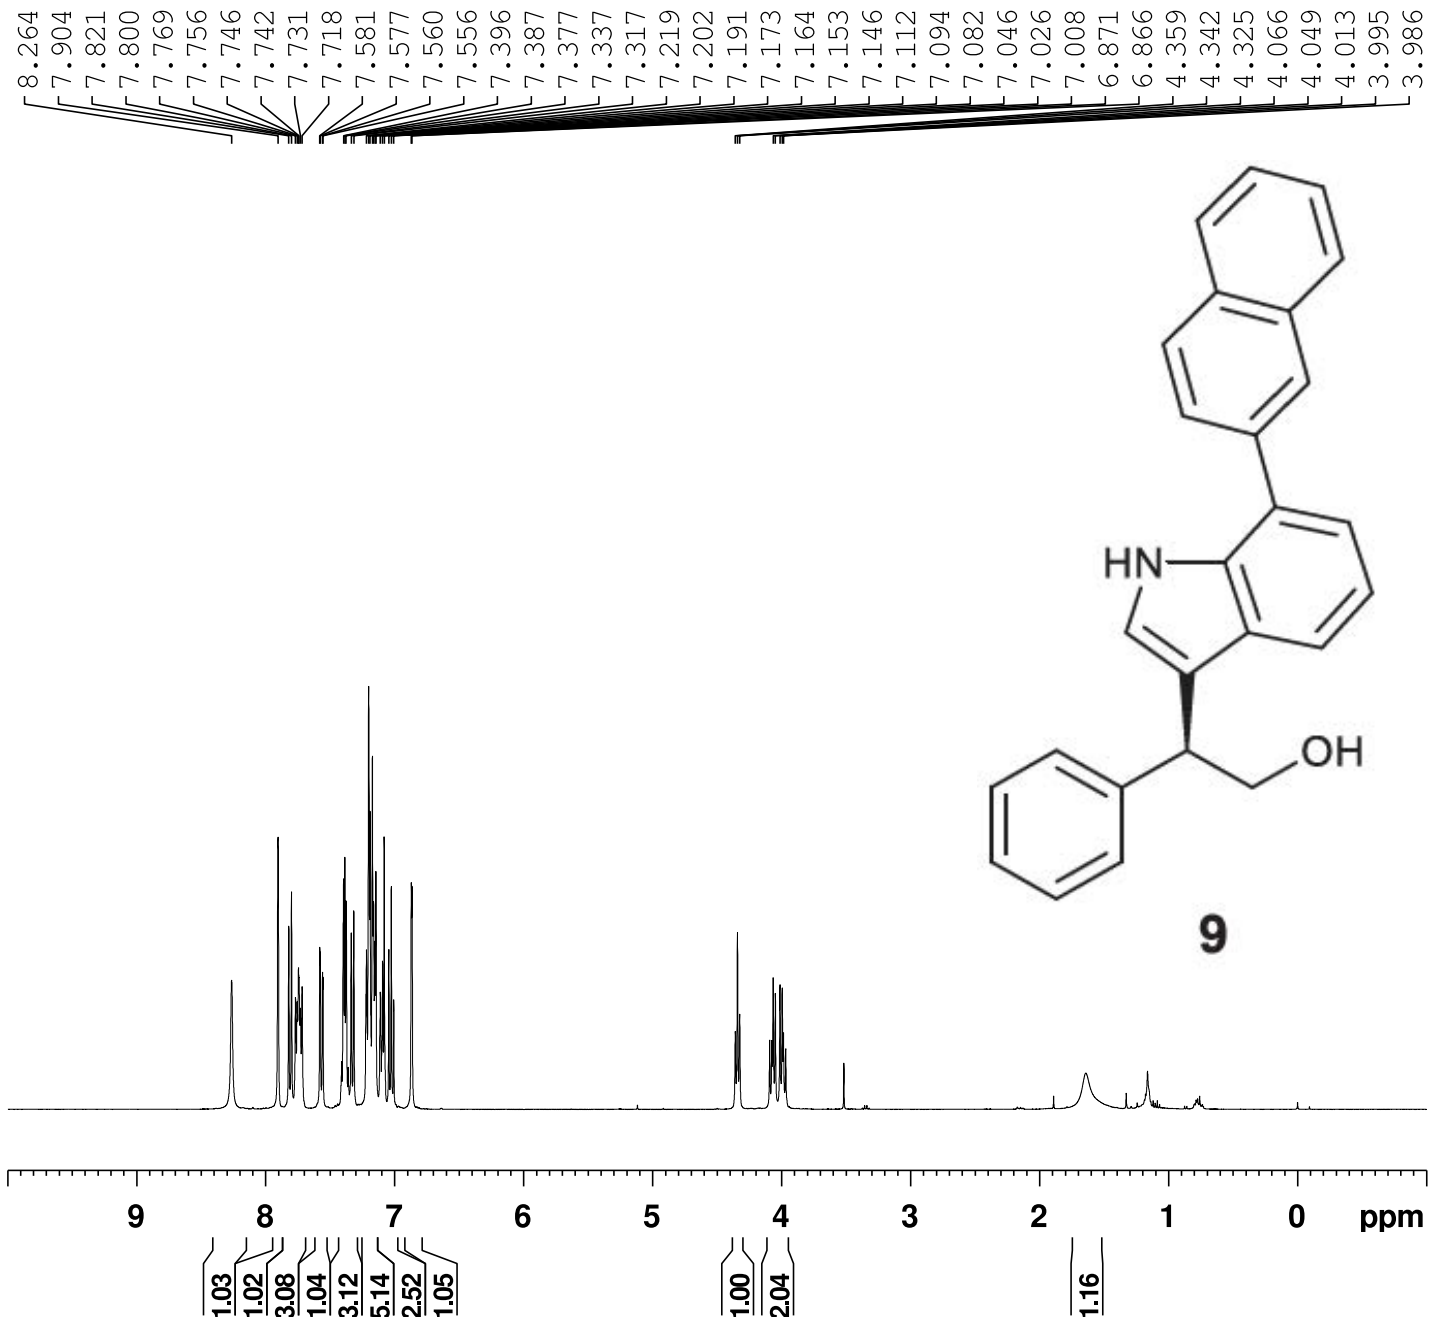



Current Data Parameters  
NAME CNMR-YX-7-p31  
EXPNO 39  
PROCNO 1

F2 - Acquisition Parameters  
Date\_ 20231109  
Time 16.16  
INSTRUM spect  
PROBHD 5 mm PADUL 13C  
PULPROG zgpg30  
TD 65536  
SOLVENT CDCl3  
NS 41  
DS 4  
SWH 24038.461 Hz  
FIDRES 0.366798 Hz  
AQ 1.3631488 sec  
RG 37.77  
DW 20.800 usec  
DE 6.50 usec  
TE 293.8 K  
D1 2.0000000 sec  
D11 0.0300000 sec  
TD0 1

==== CHANNEL f1 =====  
NUC1 13C  
P1 9.80 usec  
PLW1 47.4000153 W  
SFO1 100.6379178 MHz

==== CHANNEL f2 =====  
CPDPRG[2] waltz16  
NUC2 1H  
PCPD2 90.00 usec  
PLW2 23.0000000 W  
PLW12 0.30712000 W  
PLW13 0.24877000 W  
SFO2 400.1916008 MHz

F2 - Processing parameters  
SI 32768  
SF 100.6278560 MHz  
WDW EM  
SSB 0  
LB 1.00 Hz  
GB 0  
PC 1.40

141.70  
136.56  
134.55  
133.80  
132.71  
128.94  
128.73  
128.40  
128.08  
127.91  
127.59  
126.91  
126.86  
126.70  
126.65  
126.25  
125.70  
122.60  
122.31  
120.23  
118.83  
116.49

66.47

45.70

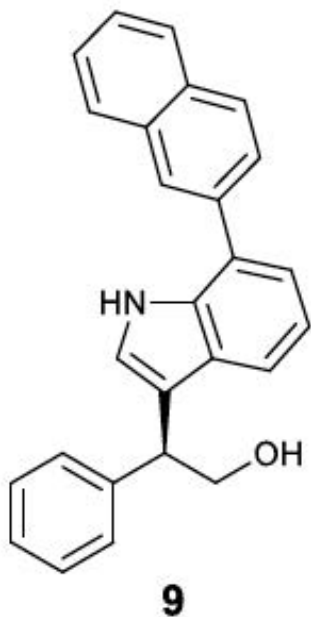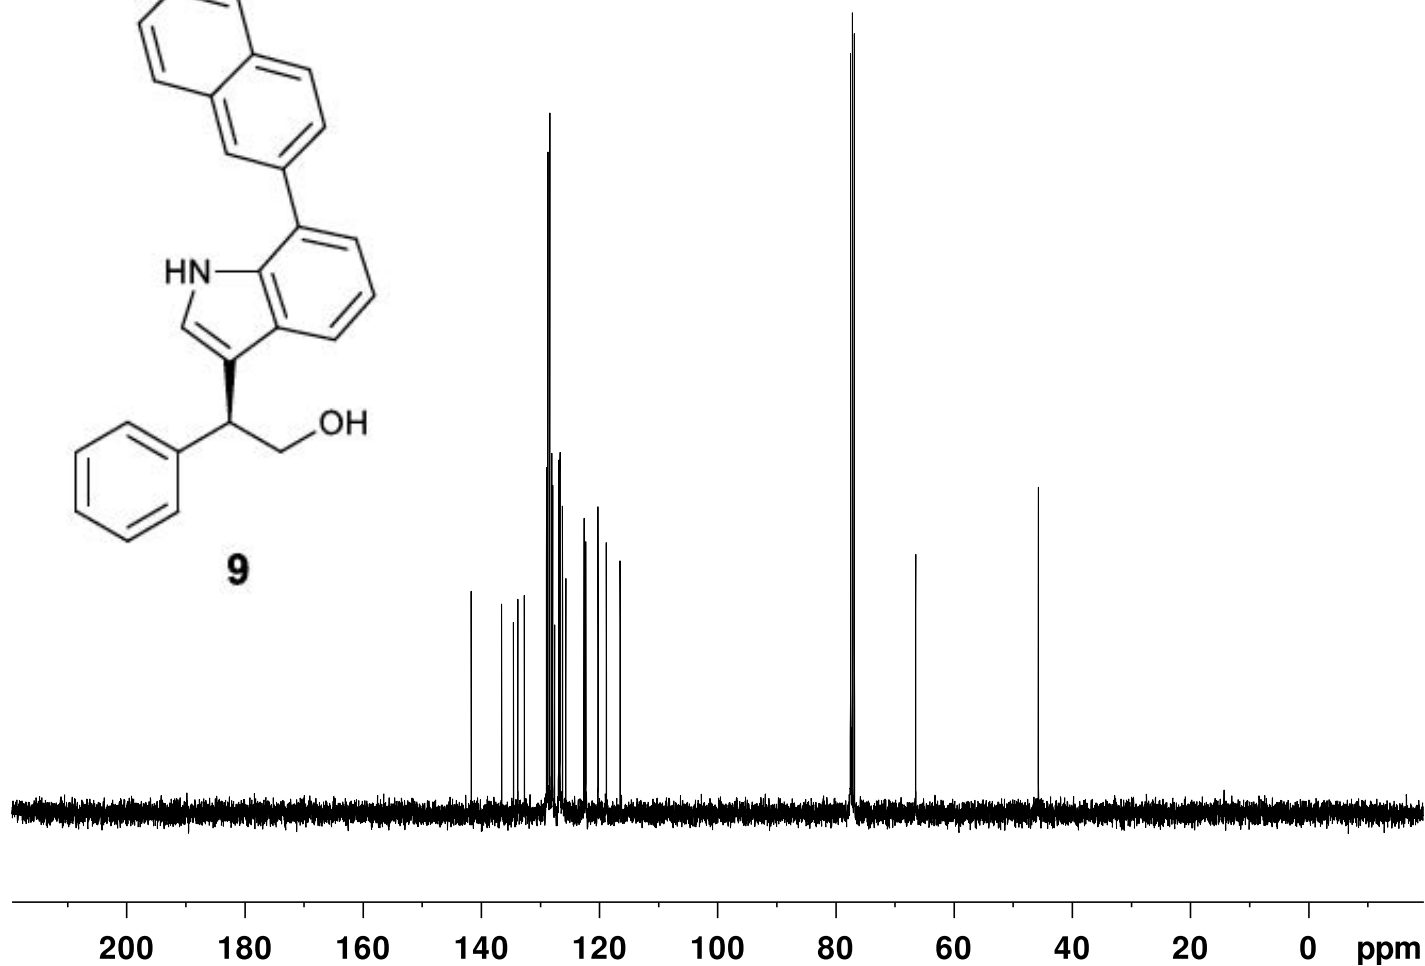

**3aa**, HPLC conditions: Daicel CHIRALPAK® IC column; 10% *i*-PrOH in *n*-hexane; 1.0 mL/min,  $\lambda = 254$  nm.

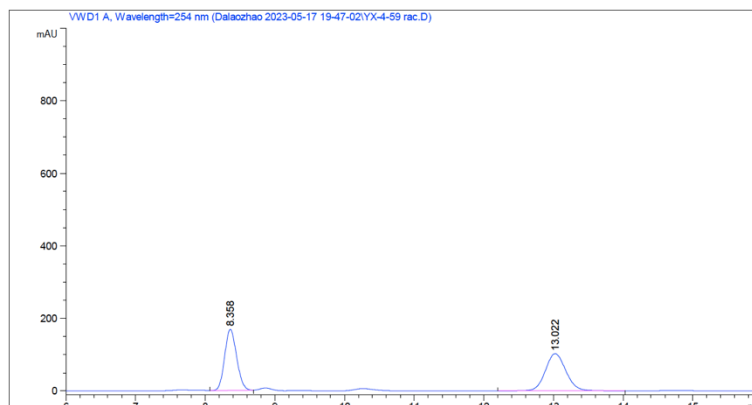

| Peak | RetTime[min] | Type | Width[min] | Area[mAu*s] | Height[mAU] | Area[%] |
|------|--------------|------|------------|-------------|-------------|---------|
| 1    | 8.358        | MM   | 0.1995     | 2015.11023  | 168.30583   | 48.9157 |
| 2    | 13.022       | BB   | 0.3181     | 2104.45068  | 102.54544   | 51.0843 |

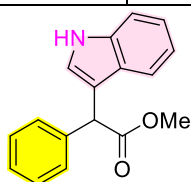

**3aa**  
racemic

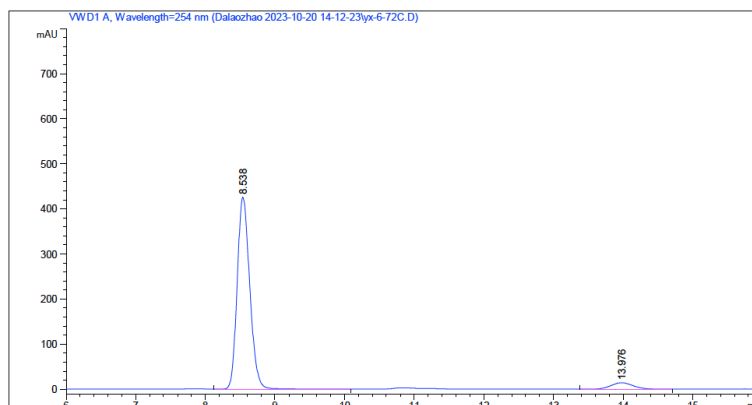

| Peak | RetTime[min] | Type | Width[min] | Area[mAu*s] | Height[mAU] | Area[%] |
|------|--------------|------|------------|-------------|-------------|---------|
| 1    | 8.538        | BV R | 0.1945     | 5344.85010  | 425.78812   | 94.4476 |
| 2    | 13.976       | BB   | 0.3453     | 314.21317   | 14.13033    | 5.5524  |

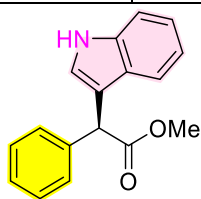

**3aa**  
enantioenriched

**3ab**, HPLC conditions: Daicel CHIRALPAK® IC column; 10% *i*-PrOH in *n*-hexane; 1.0 mL/min,  $\lambda = 254$  nm.

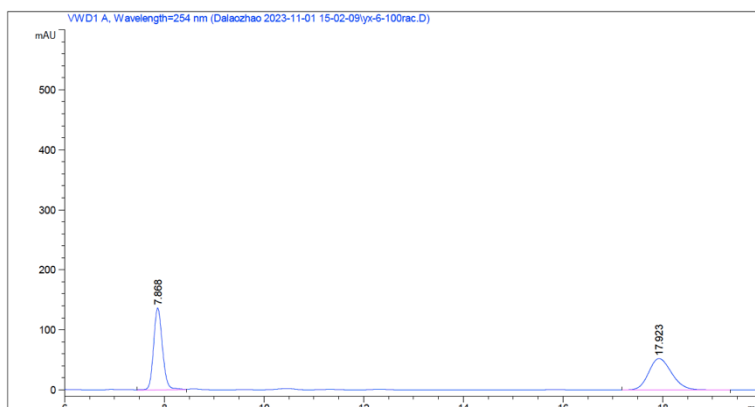

| Peak | RetTime[min] | Type | Width[min] | Area[mAu*s] | Height[mAU] | Area[%] |
|------|--------------|------|------------|-------------|-------------|---------|
| 1    | 7.868        | MM   | 0.2066     | 1690.90027  | 136.41212   | 50.4413 |
| 2    | 17.923       | BB   | 0.4955     | 1661.31531  | 52.13615    | 49.5587 |

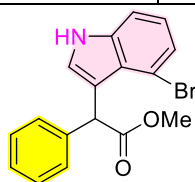

**3ab**  
racemic

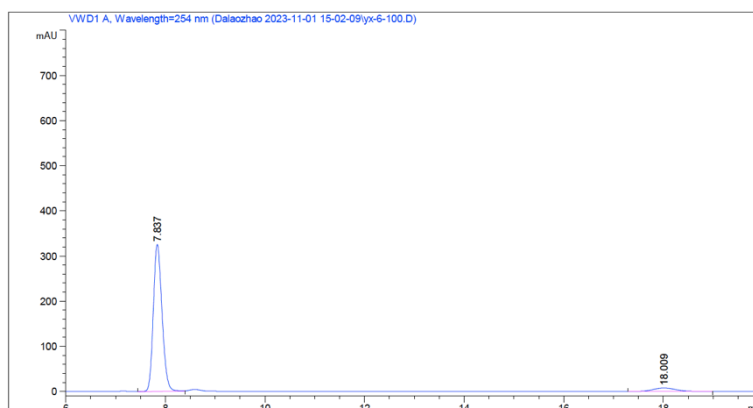

| Peak | RetTime[min] | Type | Width[min] | Area[mAu*s] | Height[mAU] | Area[%] |
|------|--------------|------|------------|-------------|-------------|---------|
| 1    | 7.837        | MM   | 0.2028     | 3966.52734  | 325.90671   | 94.1410 |
| 2    | 18.009       | BB   | 0.4892     | 246.86372   | 7.75749     | 5.8590  |

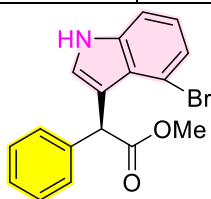

**3ab**  
enantioenriched

**3ac**, HPLC conditions: Daicel CHIRALPAK® IC column; 10% *i*-PrOH in *n*-hexane; 1.0 mL/min,  $\lambda = 254$  nm.

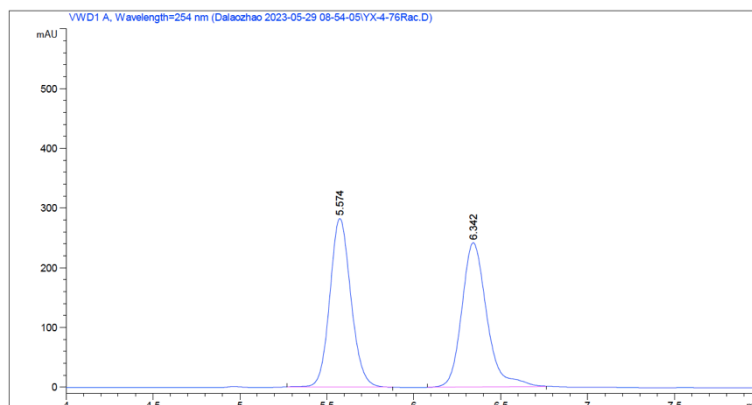

| Peak | RetTime[min] | Type | Width[min] | Area[mAu*s] | Height[mAU] | Area[%] |
|------|--------------|------|------------|-------------|-------------|---------|
| 1    | 5.574        | MM   | 0.1405     | 2380.12329  | 282.38724   | 49.6616 |
| 2    | 6.342        | MM   | 0.1665     | 2412.56396  | 241.47307   | 50.3384 |

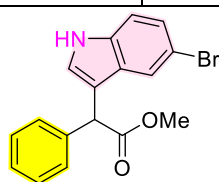

**3ac**  
racemic

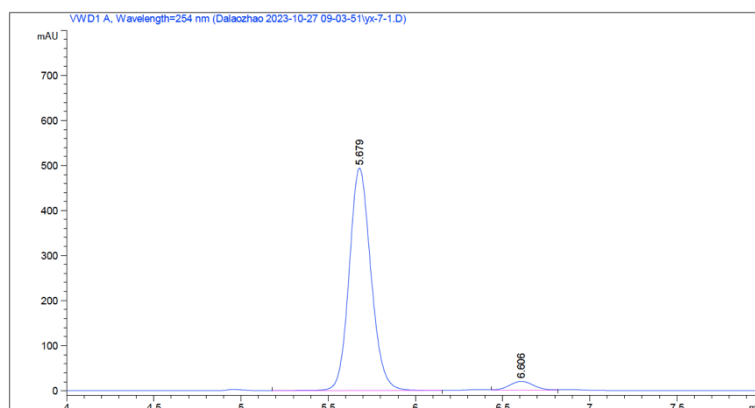

| Peak | RetTime[min] | Type | Width[min] | Area[mAu*s] | Height[mAU] | Area[%] |
|------|--------------|------|------------|-------------|-------------|---------|
| 1    | 5.679        | BB   | 0.1345     | 4277.72852  | 494.04504   | 95.9251 |
| 2    | 6.606        | MM   | 0.1567     | 181.71617   | 181.71617   | 4.0749  |

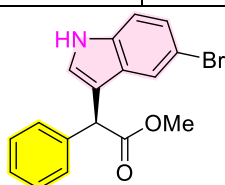

**3ac**  
enantioenriched

**3ad**, HPLC conditions: Daicel CHIRALPAK® IC column; 10% *i*-PrOH in *n*-hexane; 1.0 mL/min,  $\lambda = 254$  nm.

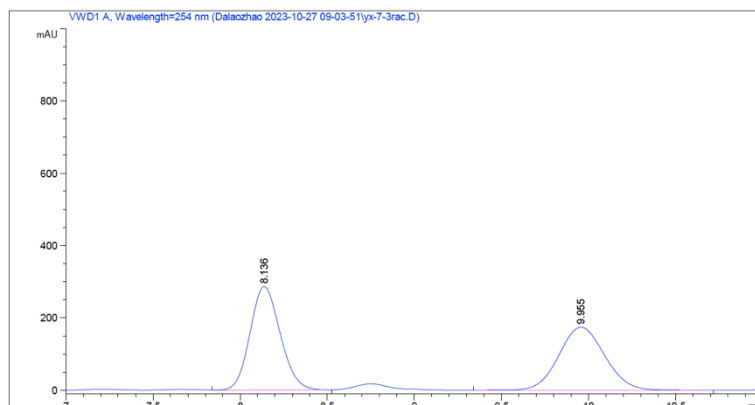

| Peak | RetTime[min] | Type | Width[min] | Area[mAu*s] | Height[mAU] | Area[%] |
|------|--------------|------|------------|-------------|-------------|---------|
| 1    | 8.136        | MM   | 0.2013     | 3455.89429  | 286.08041   | 52.0110 |
| 2    | 9.955        | BB   | 0.2852     | 3188.65625  | 173.98116   | 47.9890 |

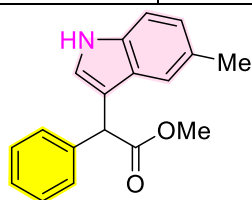

**3ad**  
racemic

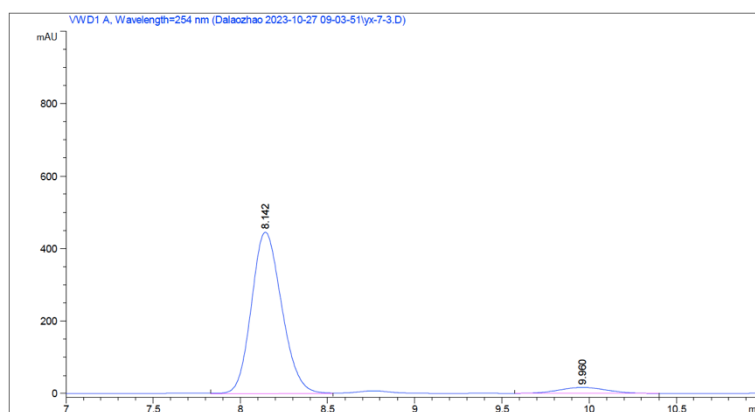

| Peak | RetTime[min] | Type | Width[min] | Area[mAu*s] | Height[mAU] | Area[%] |
|------|--------------|------|------------|-------------|-------------|---------|
| 1    | 8.142        | MM   | 0.2016     | 5397.20410  | 446.26401   | 94.2079 |
| 2    | 9.960        | MM   | 0.3286     | 331.83267   | 16.82945    | 5.7921  |

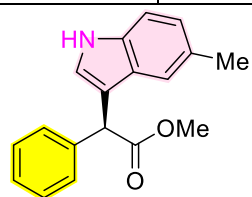

**3ad**  
enantioenriched

**3ae**, HPLC conditions: Daicel CHIRALPAK® IC column; 10% *i*-PrOH in *n*-hexane; 1.0 mL/min,  $\lambda = 254$  nm.

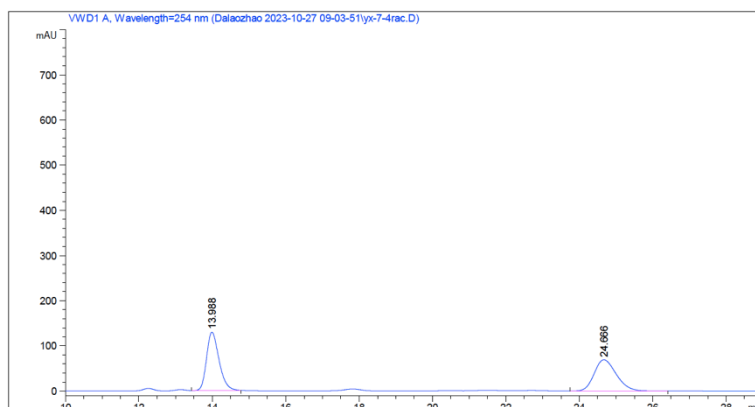

| Peak | RetTime[min] | Type | Width[min] | Area[mAu*s] | Height[mAU] | Area[%] |
|------|--------------|------|------------|-------------|-------------|---------|
| 1    | 13.988       | MM   | 0.3965     | 3084.40088  | 129.65916   | 51.7206 |
| 2    | 24.666       | BB   | 0.6432     | 2879.17822  | 69.11674    | 48.2794 |

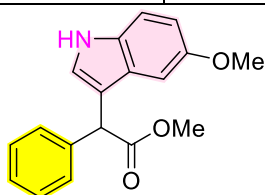

**3ae**  
racemic

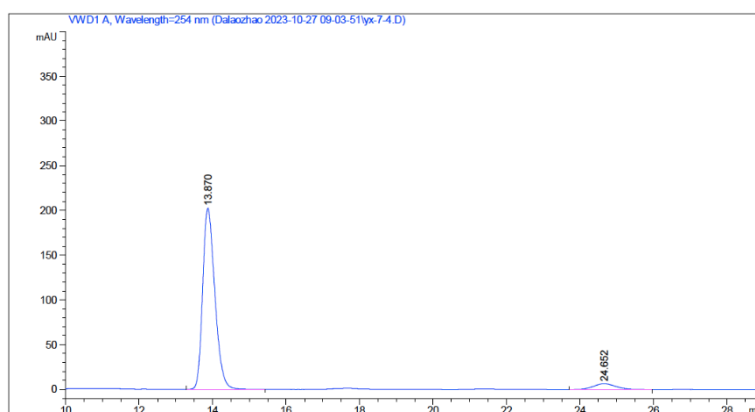

| Peak | RetTime[min] | Type | Width[min] | Area[mAu*s] | Height[mAU] | Area[%] |
|------|--------------|------|------------|-------------|-------------|---------|
| 1    | 13.870       | BB   | 0.3561     | 4663.82080  | 202.43958   | 94.6770 |
| 2    | 24.652       | BB   | 0.6285     | 262.21152   | 6.29726     | 5.3230  |

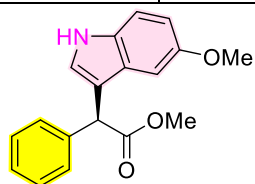

**3ae**  
enantioenriched

**3af**, HPLC conditions: Daicel CHIRALPAK® AD-H column; 10% *i*-PrOH in *n*-hexane; 1.0 mL/min,  $\lambda = 254$  nm.

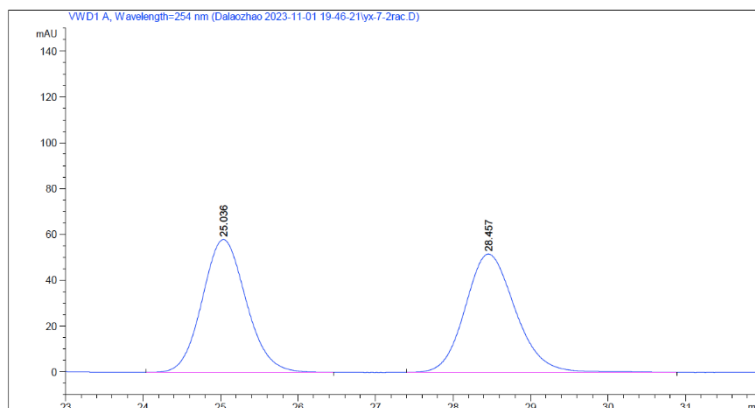

| Peak | RetTime[min] | Type | Width[min] | Area[mAu*s] | Height[mAU] | Area[%] |
|------|--------------|------|------------|-------------|-------------|---------|
| 1    | 25.036       | BB   | 0.6115     | 2276.97852  | 57.92403    | 49.5498 |
| 2    | 28.457       | BB   | 0.6860     | 2318.35132  | 51.58177    | 50.4502 |

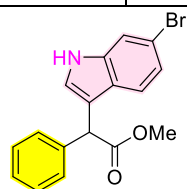

**3af**  
racemic

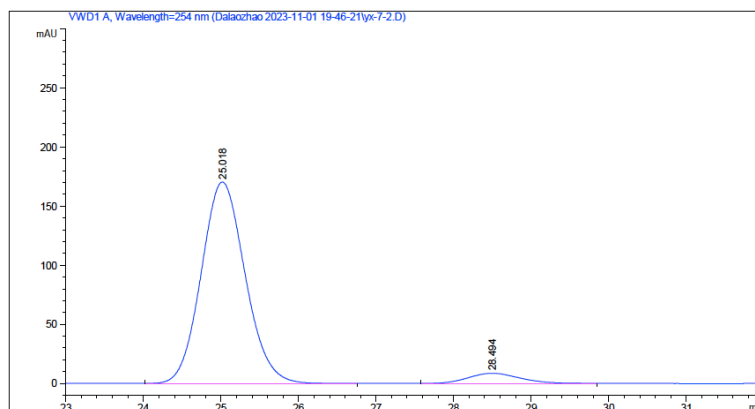

| Peak | RetTime[min] | Type | Width[min] | Area[mAu*s] | Height[mAU] | Area[%] |
|------|--------------|------|------------|-------------|-------------|---------|
| 1    | 25.018       | BB   | 0.6115     | 6696.18604  | 170.33723   | 94.4089 |
| 2    | 28.494       | BB   | 0.6744     | 396.56339   | 8.60688     | 5.5911  |

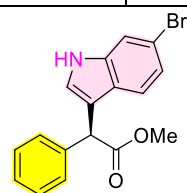

**3af**  
enantioenriched



**3ag**, HPLC conditions: Daicel CHIRALPAK® AD-H column; 10% *i*-PrOH in *n*-hexane; 1.0 mL/min,  $\lambda = 254$  nm.

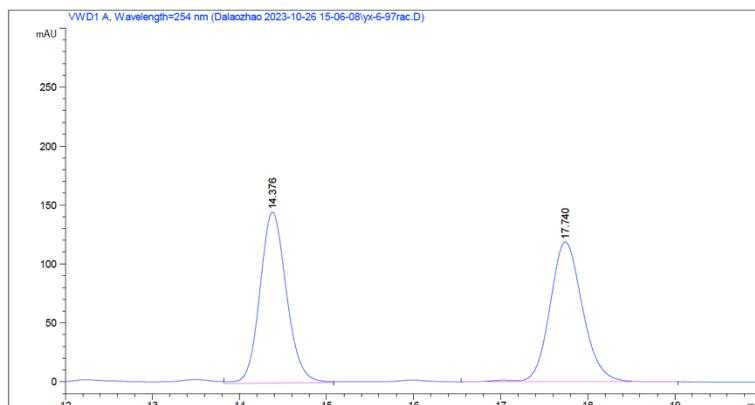

| Peak | RetTime[min] | Type | Width[min] | Area[mAu*s] | Height[mAU] | Area[%] |
|------|--------------|------|------------|-------------|-------------|---------|
| 1    | 14.376       | MM   | 0.3534     | 3078.99561  | 145.21498   | 49.8657 |
| 2    | 17.740       | VB R | 0.3987     | 3095.57861  | 118.76035   | 50.1343 |

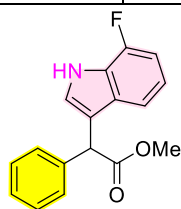

**3ag**  
racemic

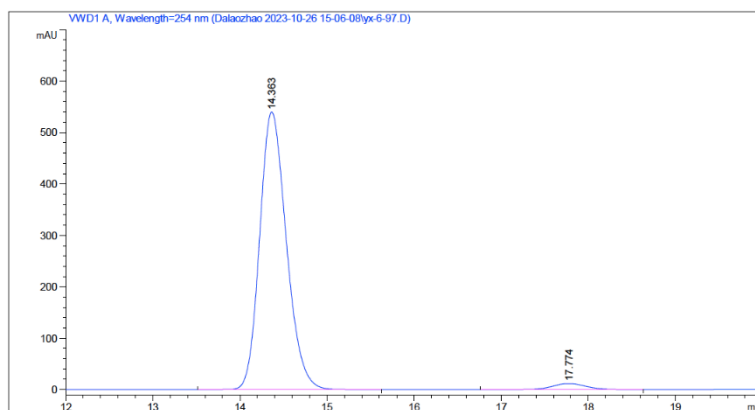

| Peak | RetTime[min] | Type | Width[min] | Area[mAu*s] | Height[mAU] | Area[%] |
|------|--------------|------|------------|-------------|-------------|---------|
| 1    | 14.363       | BB   | 0.3297     | 1.14879e4   | 540.09894   | 97.2197 |
| 2    | 17.774       | BB   | 0.4137     | 328.53394   | 12.01425    | 2.7803  |

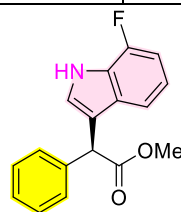

**3ag**  
enantioenriched

**3ah**, HPLC conditions: Daicel CHIRALPAK® AD-H column; 10% *i*-PrOH in *n*-hexane; 1.0 mL/min,  $\lambda = 254$  nm.

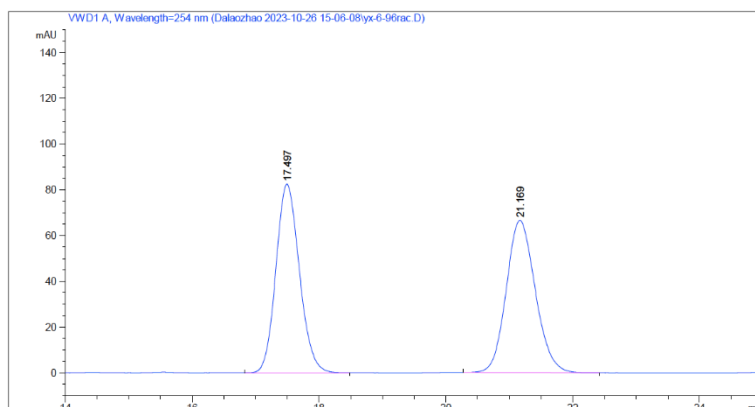

| Peak | RetTime[min] | Type | Width[min] | Area[mAu*s] | Height[mAU] | Area[%] |
|------|--------------|------|------------|-------------|-------------|---------|
| 1    | 17.497       | BB   | 0.4004     | 2121.39917  | 82.52696    | 49.9876 |
| 2    | 21.169       | BB   | 0.4959     | 2122.45435  | 66.53132    | 50.0124 |

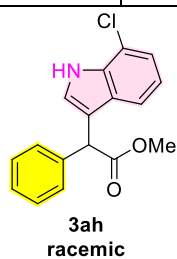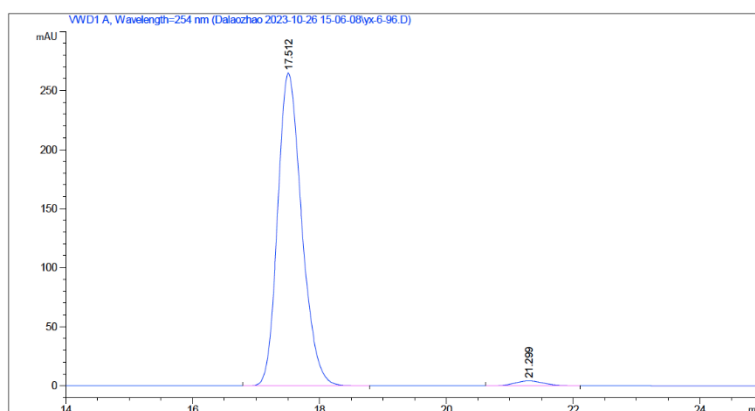

| Peak | RetTime[min] | Type | Width[min] | Area[mAu*s] | Height[mAU] | Area[%] |
|------|--------------|------|------------|-------------|-------------|---------|
| 1    | 17.512       | BB   | 0.4073     | 6964.32666  | 264.82855   | 98.2100 |
| 2    | 21.299       | BB   | 0.4704     | 126.93218   | 4.06736     | 1.7900  |

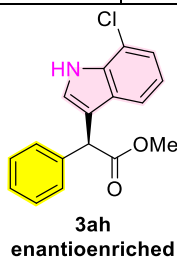

**3ai**, HPLC conditions: Daicel CHIRALPAK® IC column; 10% *i*-PrOH in *n*-hexane; 1.0 mL/min,  $\lambda = 254$  nm.

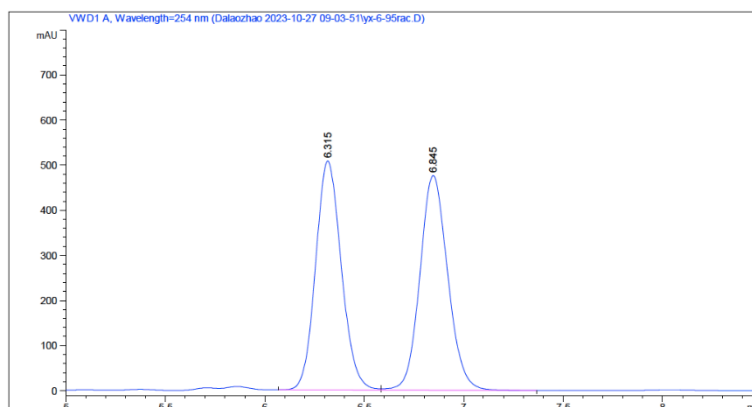

| Peak | RetTime[min] | Type | Width[min] | Area[mAu*s] | Height[mAU] | Area[%] |
|------|--------------|------|------------|-------------|-------------|---------|
| 1    | 6.315        | BV   | 0.1399     | 4565.25244  | 507.57706   | 49.6279 |
| 2    | 6.845        | VB   | 0.1515     | 4633.71777  | 475.90207   | 50.3721 |

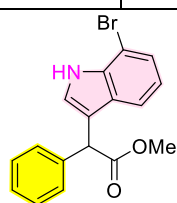

**3ai**  
racemic

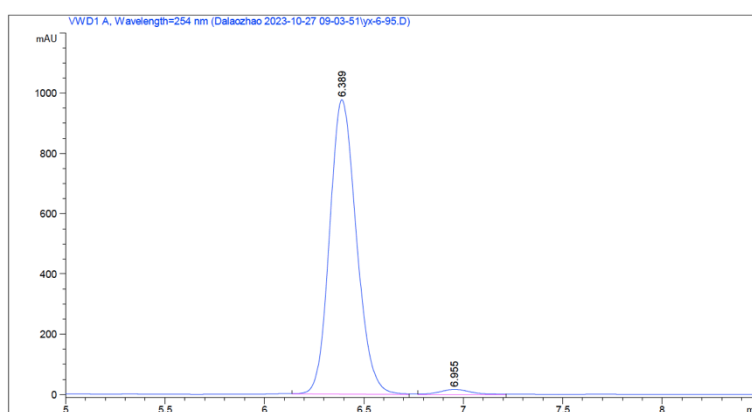

| Peak | RetTime[min] | Type | Width[min] | Area[mAu*s] | Height[mAU] | Area[%] |
|------|--------------|------|------------|-------------|-------------|---------|
| 1    | 6.389        | MM   | 0.1557     | 9134.68457  | 977.93396   | 98.0929 |
| 2    | 6.955        | MM   | 0.1783     | 177.59837   | 16.60449    | 1.9071  |

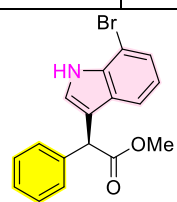

**3ai**  
enantioenriched

**3aj**, HPLC conditions: Daicel CHIRALPAK® IC column; 10% *i*-PrOH in *n*-hexane; 1.0 mL/min,  $\lambda = 254$  nm.

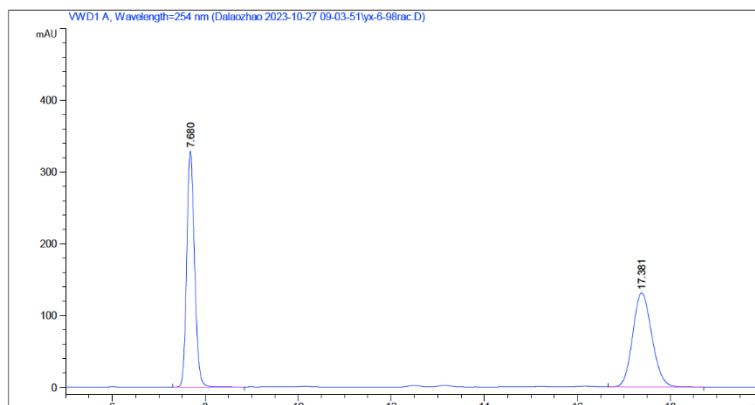

| Peak | RetTime[min] | Type | Width[min] | Area[mAu*s] | Height[mAU] | Area[%] |
|------|--------------|------|------------|-------------|-------------|---------|
| 1    | 7.680        | BB   | 0.1798     | 3839.78809  | 329.11990   | 50.6146 |
| 2    | 17.381       | BB   | 0.4427     | 3746.53955  | 131.05153   | 49.3854 |

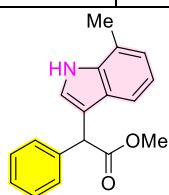

**3aj**  
racemic

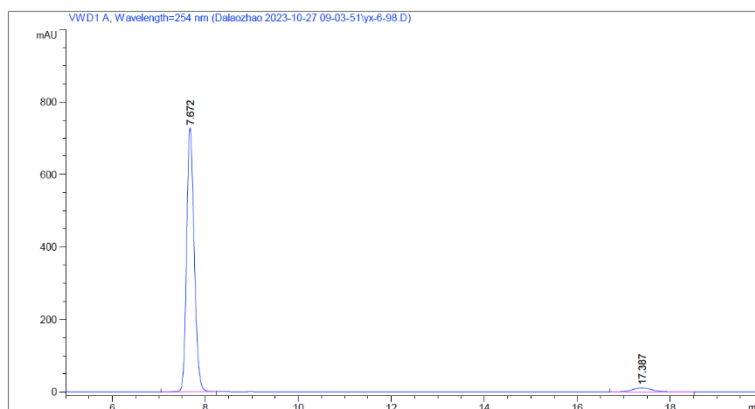

| Peak | RetTime[min] | Type | Width[min] | Area[mAu*s] | Height[mAU] | Area[%] |
|------|--------------|------|------------|-------------|-------------|---------|
| 1    | 7.672        | BB   | 0.1743     | 8234.94531  | 727.53772   | 96.3361 |
| 2    | 17.387       | BB   | 0.4477     | 313.19550   | 10.88716    | 3.6639  |

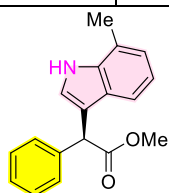

**3aj**  
enantioenriched

**3ak**, HPLC conditions: Daicel CHIRALPAK® IC column; 10% *i*-PrOH in *n*-hexane; 1.0 mL/min,  $\lambda = 254$  nm.

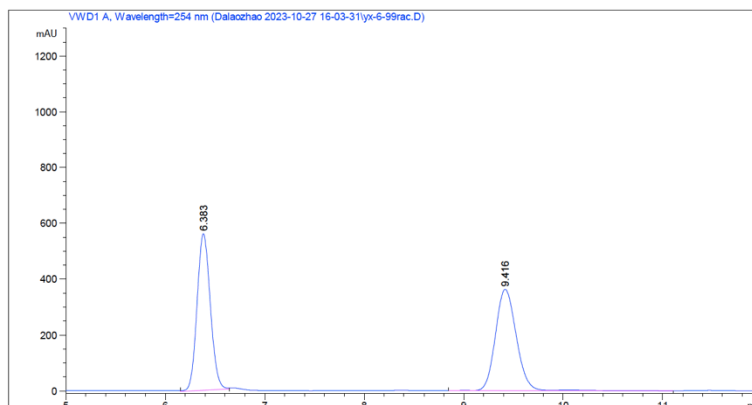

| Peak | RetTime[min] | Type | Width[min] | Area[mAu*s] | Height[mAU] | Area[%] |
|------|--------------|------|------------|-------------|-------------|---------|
| 1    | 6.383        | MM   | 0.1542     | 5197.50049  | 561.69751   | 49.3516 |
| 2    | 9.416        | VV R | 0.2258     | 5334.07568  | 363.45309   | 50.6484 |

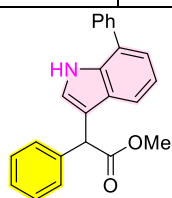

**3ak**  
racemic

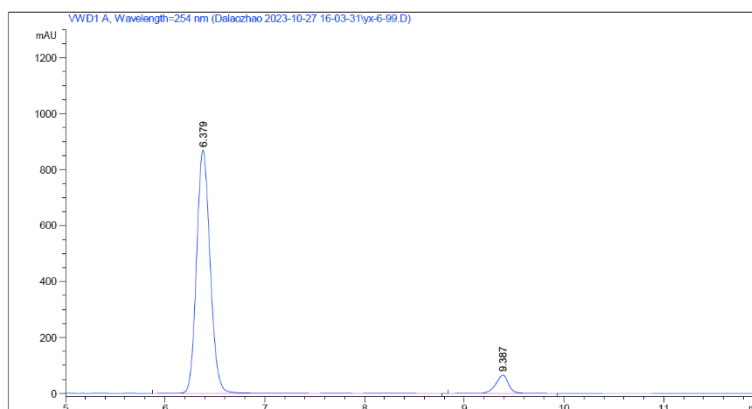

| Peak | RetTime[min] | Type | Width[min] | Area[mAu*s] | Height[mAU] | Area[%] |
|------|--------------|------|------------|-------------|-------------|---------|
| 1    | 6.379        | BV R | 0.1483     | 8237.36230  | 869.79108   | 93.3530 |
| 2    | 9.387        | VB R | 0.1334     | 586.52661   | 65.64225    | 6.6470  |

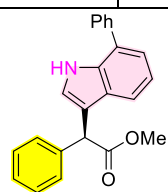

**3ak**  
enantioenriched

**3a1**, HPLC conditions: Daicel CHIRALPAK® AD-H column; 15% *i*-PrOH in *n*-hexane; 1.0 mL/min,  $\lambda = 254$  nm.

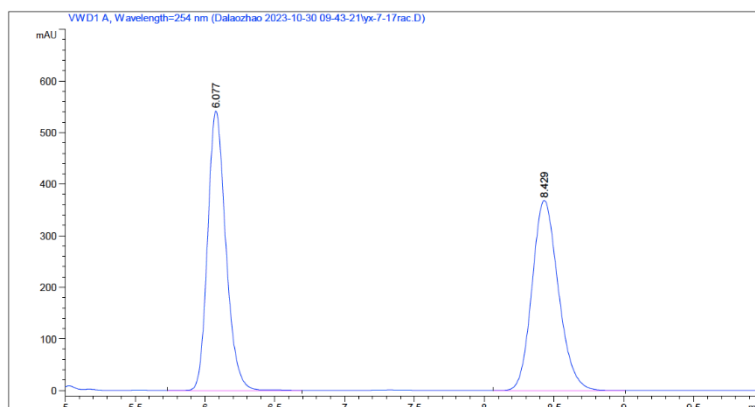

| Peak | RetTime[min] | Type | Width[min] | Area[mAu*s] | Height[mAU] | Area[%] |
|------|--------------|------|------------|-------------|-------------|---------|
| 1    | 6.077        | BV R | 0.1391     | 4903.29199  | 541.56464   | 50.4061 |
| 2    | 8.429        | BB   | 0.2022     | 4824.28320  | 368.59659   | 49.5939 |

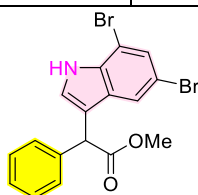

**3a1**  
racemic

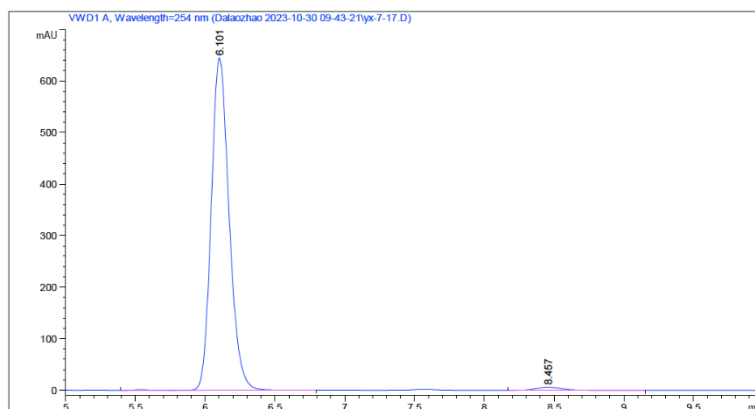

| Peak | RetTime[min] | Type | Width[min] | Area[mAu*s] | Height[mAU] | Area[%] |
|------|--------------|------|------------|-------------|-------------|---------|
| 1    | 6.101        | VB R | 0.1375     | 5752.96143  | 645.16888   | 98.6777 |
| 2    | 8.457        | BB   | 0.1981     | 77.09069    | 5.99429     | 1.3223  |

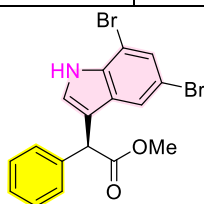

**3a1**  
enantioenriched

**3am**, HPLC conditions: Daicel CHIRALPAK® IC column; 10% *i*-PrOH in *n*-hexane; 1.0 mL/min,  $\lambda = 254$  nm.

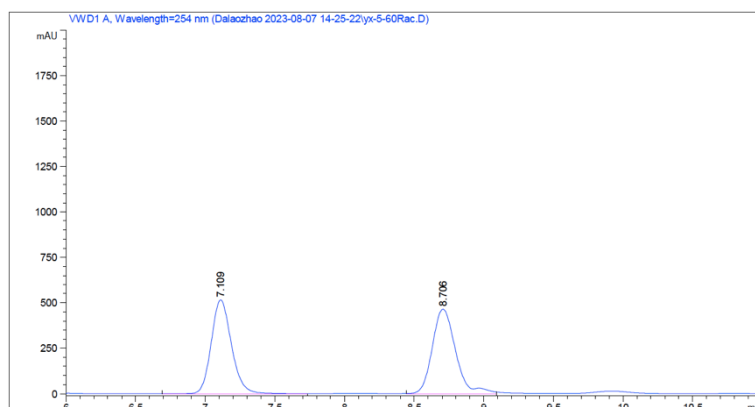

| Peak | RetTime[min] | Type | Width[min] | Area[mAu*s] | Height[mAU] | Area[%] |
|------|--------------|------|------------|-------------|-------------|---------|
| 1    | 7.109        | BB   | 0.1556     | 5207.08936  | 515.92908   | 49.0863 |
| 2    | 8.706        | MM   | 0.1935     | 5400.93262  | 465.08133   | 50.9137 |

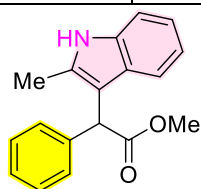

**3am**  
racemic

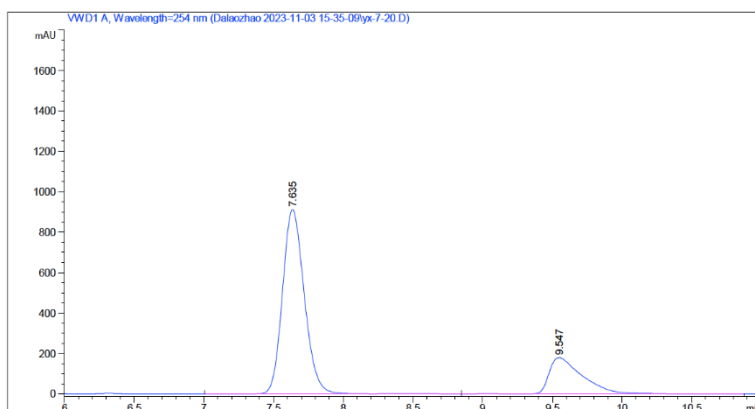

| Peak | RetTime[min] | Type | Width[min] | Area[mAu*s] | Height[mAU] | Area[%] |
|------|--------------|------|------------|-------------|-------------|---------|
| 1    | 7.635        | BV R | 0.1695     | 9943.59375  | 911.83105   | 76.8718 |
| 2    | 9.547        | VB R | 0.2382     | 2991.70679  | 179.76665   | 23.1282 |

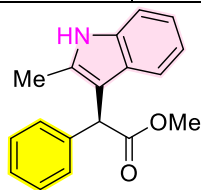

**3am**  
enantioenriched

**3ba**, HPLC conditions: Daicel CHIRALPAK® IC column; 10% *i*-PrOH in *n*-hexane; 1.0 mL/min,  $\lambda = 254$  nm.

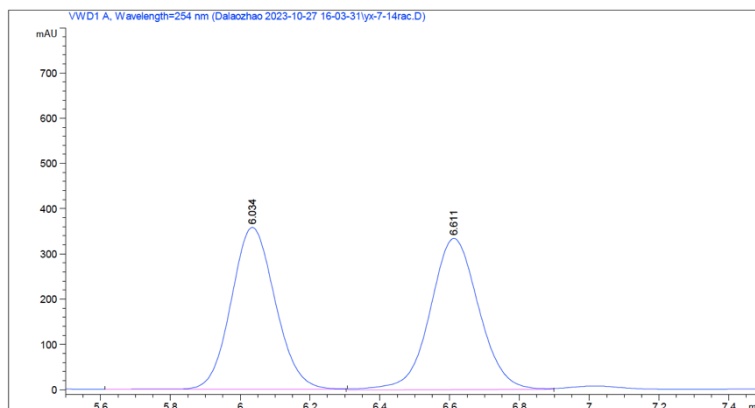

| Peak | RetTime[min] | Type | Width[min] | Area[mAu*s] | Height[mAU] | Area[%] |
|------|--------------|------|------------|-------------|-------------|---------|
| 1    | 6.034        | VV R | 0.1359     | 3143.28076  | 358.17963   | 49.2399 |
| 2    | 6.611        | MM   | 0.1614     | 3240.32935  | 334.52686   | 50.7601 |

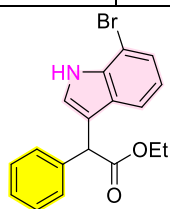

**3ba**  
racemic

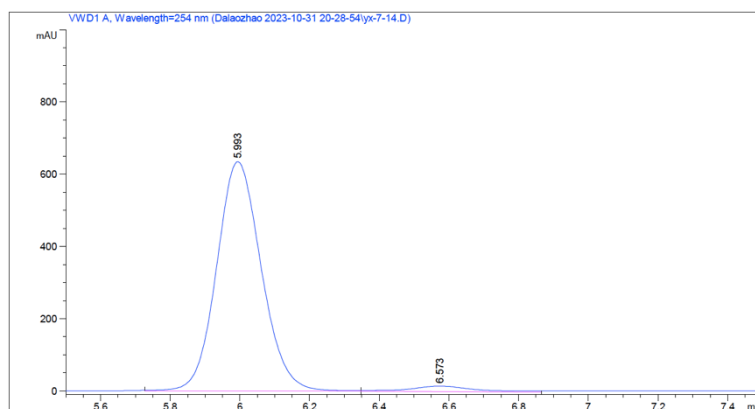

| Peak | RetTime[min] | Type | Width[min] | Area[mAu*s] | Height[mAU] | Area[%] |
|------|--------------|------|------------|-------------|-------------|---------|
| 1    | 5.993        | MM   | 0.1488     | 5681.47314  | 636.52856   | 96.5610 |
| 2    | 6.573        | MM   | 0.2213     | 202.34578   | 15.23856    | 3.4390  |

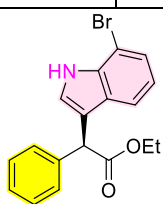

**3ba**  
enantioenriched



**3ca**, HPLC conditions: Daicel CHIRALPAK® IC column; 10% *i*-PrOH in *n*-hexane; 1.0 mL/min,  $\lambda = 254$  nm.

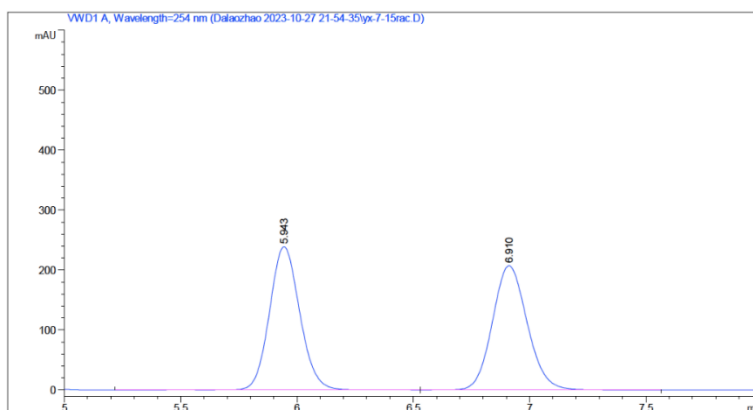

| Peak | RetTime[min] | Type | Width[min] | Area[mAu*s] | Height[mAU] | Area[%] |
|------|--------------|------|------------|-------------|-------------|---------|
| 1    | 5.943        | VV R | 0.1412     | 2174.64136  | 238.87578   | 50.1834 |
| 2    | 6.910        | VB   | 0.1610     | 2158.74292  | 207.04608   | 49.8166 |

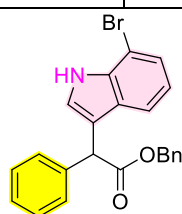

**3ca**  
racemic

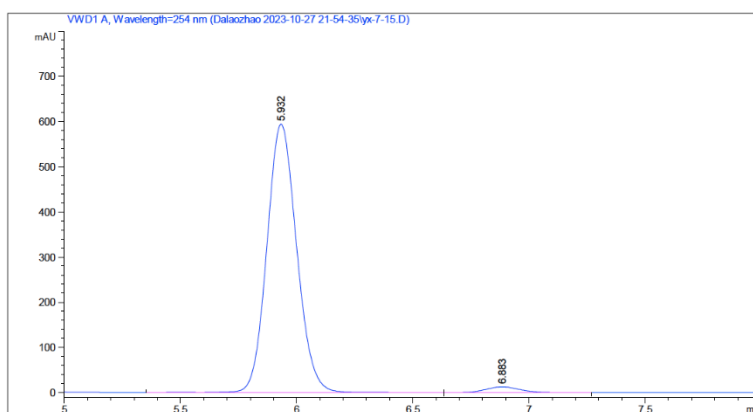

| Peak | RetTime[min] | Type | Width[min] | Area[mAu*s] | Height[mAU] | Area[%] |
|------|--------------|------|------------|-------------|-------------|---------|
| 1    | 5.932        | VV R | 0.1389     | 5292.96875  | 594.27356   | 97.5667 |
| 2    | 6.883        | VB   | 0.1608     | 132.00677   | 12.67865    | 2.4333  |

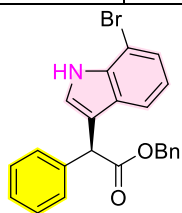

**3ca**  
enantioenriched

**3da**, HPLC conditions: Daicel CHIRALPAK® AD-H column; 10% *i*-PrOH in *n*-hexane; 1.0 mL/min,  $\lambda = 254$  nm.

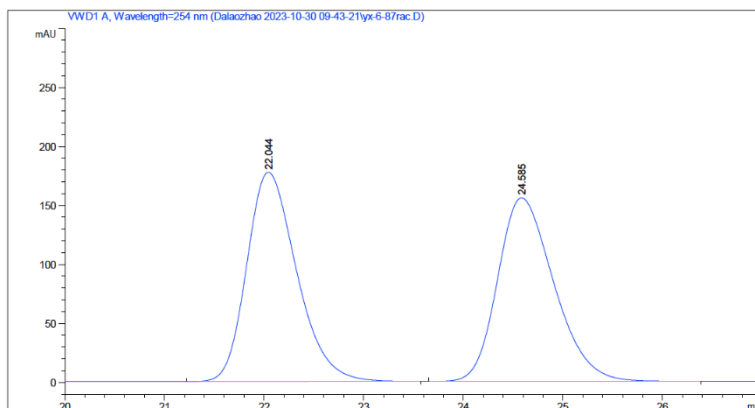

| Peak | RetTime[min] | Type | Width[min] | Area[mAu*s] | Height[mAU] | Area[%] |
|------|--------------|------|------------|-------------|-------------|---------|
| 1    | 22.044       | BB   | 0.5360     | 6152.14941  | 177.21953   | 50.2729 |
| 2    | 24.585       | BB   | 0.6026     | 6085.36816  | 155.35538   | 49.7271 |

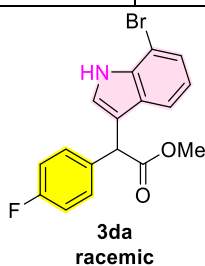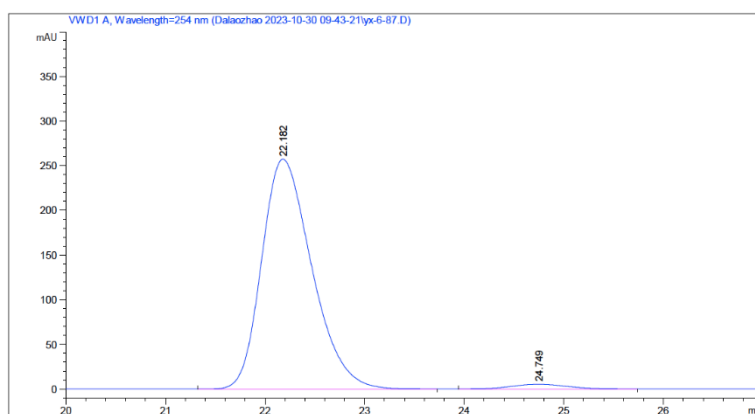

| Peak | RetTime[min] | Type | Width[min] | Area[mAu*s] | Height[mAU] | Area[%] |
|------|--------------|------|------------|-------------|-------------|---------|
| 1    | 22.182       | BB   | 0.5382     | 8975.84863  | 257.17630   | 97.8707 |
| 2    | 24.749       | BB   | 0.5475     | 195.27715   | 5.18126     | 2.1293  |

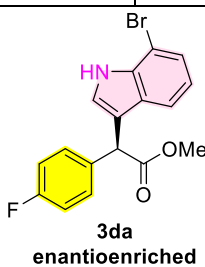

**3ea**, HPLC conditions: Daicel CHIRALPAK® AD-H column; 15% *i*-PrOH in *n*-hexane; 1.0 mL/min,  $\lambda = 254$  nm.

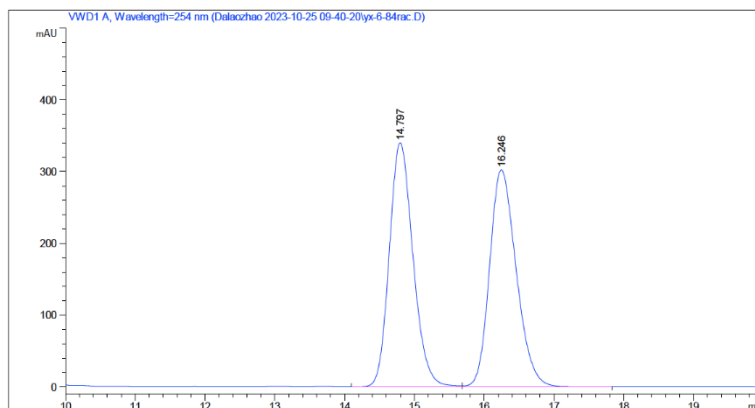

| Peak | RetTime[min] | Type | Width[min] | Area[mAu*s] | Height[mAU] | Area[%] |
|------|--------------|------|------------|-------------|-------------|---------|
| 1    | 14.797       | BV   | 0.3657     | 8027.72852  | 340.08710   | 50.0432 |
| 2    | 16.246       | VB   | 0.4111     | 8013.86133  | 302.35474   | 49.9568 |

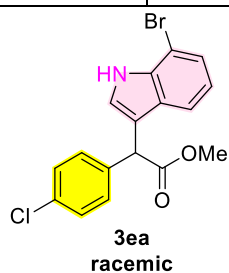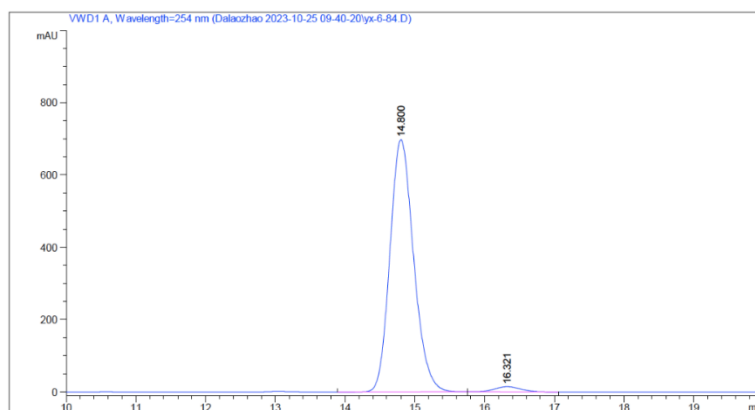

| Peak | RetTime[min] | Type | Width[min] | Area[mAu*s] | Height[mAU] | Area[%] |
|------|--------------|------|------------|-------------|-------------|---------|
| 1    | 14.800       | BB   | 0.3655     | 1.64477e4   | 697.21027   | 97.8224 |
| 2    | 16.321       | BB   | 0.4000     | 366.13092   | 14.25980    | 2.1776  |

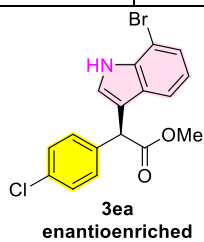

**3fa**, HPLC conditions: Daicel CHIRALPAK® AD-H column; 15% *i*-PrOH in *n*-hexane; 1.0 mL/min,  $\lambda = 254$  nm.

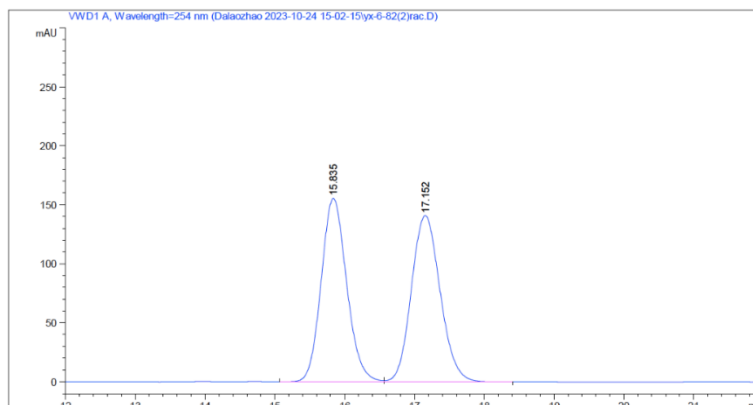

| Peak | RetTime[min] | Type | Width[min] | Area[mAu*s] | Height[mAU] | Area[%] |
|------|--------------|------|------------|-------------|-------------|---------|
| 1    | 15.835       | BV   | 0.3921     | 3945.65674  | 155.49304   | 49.4305 |
| 2    | 17.152       | VB   | 0.4462     | 4036.58228  | 140.96289   | 50.5695 |

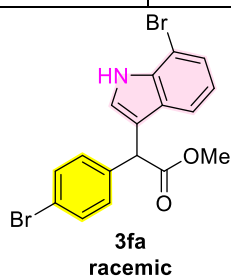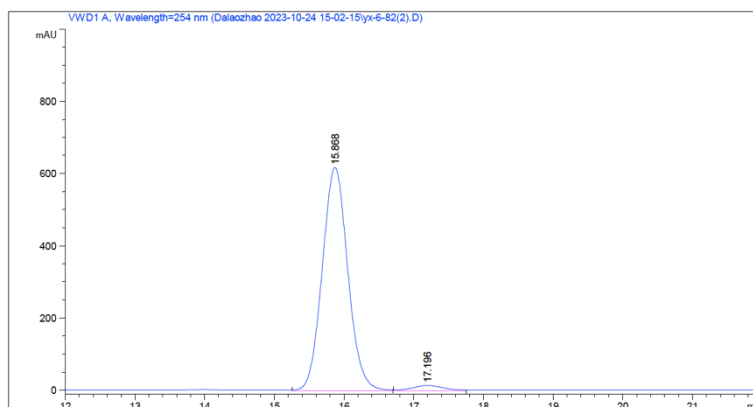

| Peak | RetTime[min] | Type | Width[min] | Area[mAu*s] | Height[mAU] | Area[%] |
|------|--------------|------|------------|-------------|-------------|---------|
| 1    | 15.868       | MM   | 0.4260     | 1.58054e4   | 618.36914   | 97.1078 |
| 2    | 17.196       | MM   | 0.5332     | 470.73950   | 14.71398    | 2.8922  |

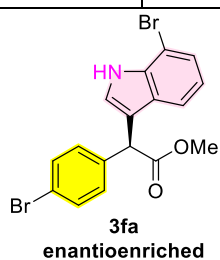

**3ga**, HPLC conditions: Daicel CHIRALPAK® AD-H column; 10% *i*-PrOH in *n*-hexane; 1.0 mL/min,  $\lambda = 254$  nm.

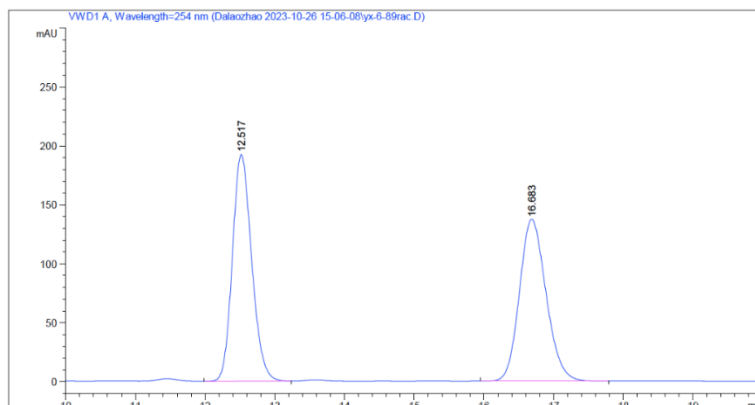

| Peak | RetTime[min] | Type | Width[min] | Area[mAu*s] | Height[mAU] | Area[%] |
|------|--------------|------|------------|-------------|-------------|---------|
| 1    | 12.517       | BB   | 0.2972     | 3699.44434  | 192.33884   | 50.3786 |
| 2    | 16.683       | BB   | 0.4118     | 3643.84033  | 137.20120   | 49.6214 |

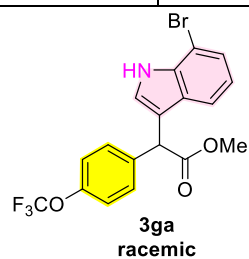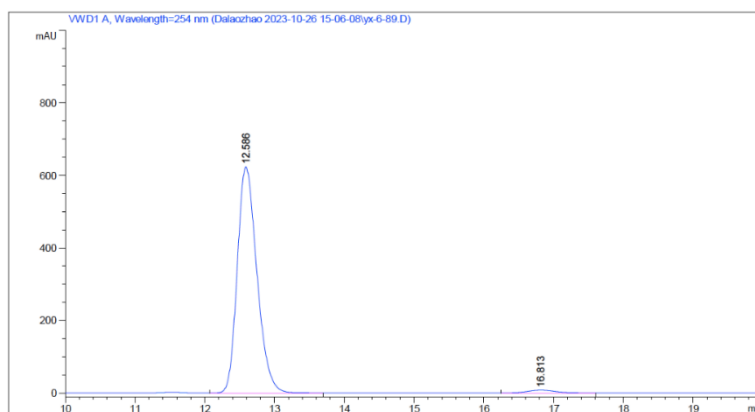

| Peak | RetTime[min] | Type | Width[min] | Area[mAu*s] | Height[mAU] | Area[%] |
|------|--------------|------|------------|-------------|-------------|---------|
| 1    | 12.586       | BB   | 0.3006     | 1.21640e4   | 623.08673   | 98.4027 |
| 2    | 16.813       | BB   | 0.4083     | 197.44684   | 7.48400     | 1.5973  |

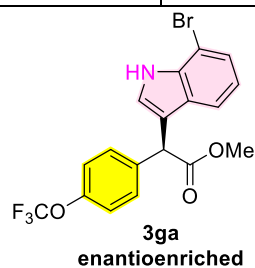

**3ha**, HPLC conditions: Daicel CHIRALPAK® AD-H column; 10% *i*-PrOH in *n*-hexane; 1.0 mL/min,  $\lambda = 254$  nm.

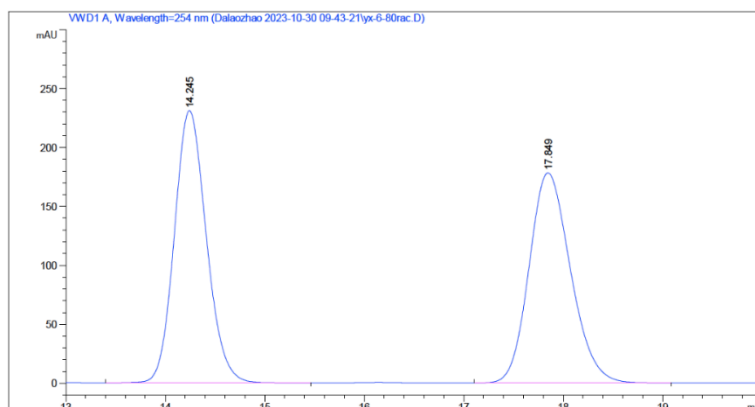

| Peak | RetTime[min] | Type | Width[min] | Area[mAu*s] | Height[mAU] | Area[%] |
|------|--------------|------|------------|-------------|-------------|---------|
| 1    | 14.245       | BB   | 0.3451     | 5161.00146  | 231.00645   | 50.0633 |
| 2    | 17.849       | BB   | 0.4463     | 5147.94727  | 178.15005   | 49.9367 |

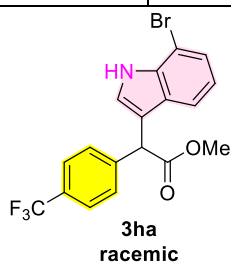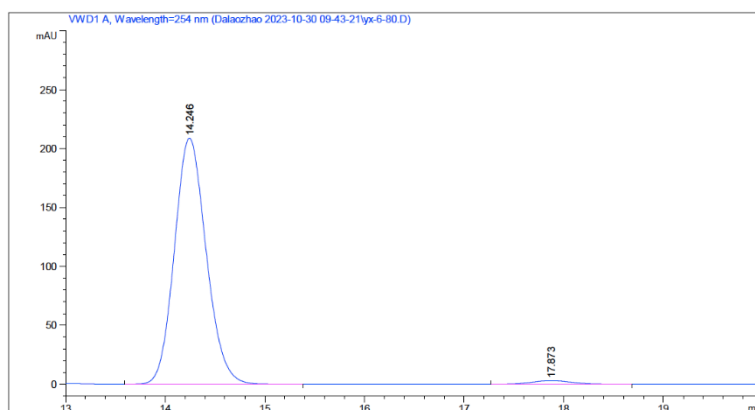

| Peak | RetTime[min] | Type | Width[min] | Area[mAu*s] | Height[mAU] | Area[%] |
|------|--------------|------|------------|-------------|-------------|---------|
| 1    | 14.246       | BB   | 0.3429     | 4623.15381  | 208.71748   | 98.1626 |
| 2    | 17.873       | BB   | 0.4212     | 86.53774    | 3.02434     | 1.8374  |

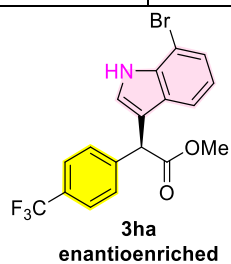

**3ia**, HPLC conditions: Daicel CHIRALPAK® AD-H column; 15% *i*-PrOH in *n*-hexane; 1.0 mL/min,  $\lambda = 254$  nm.

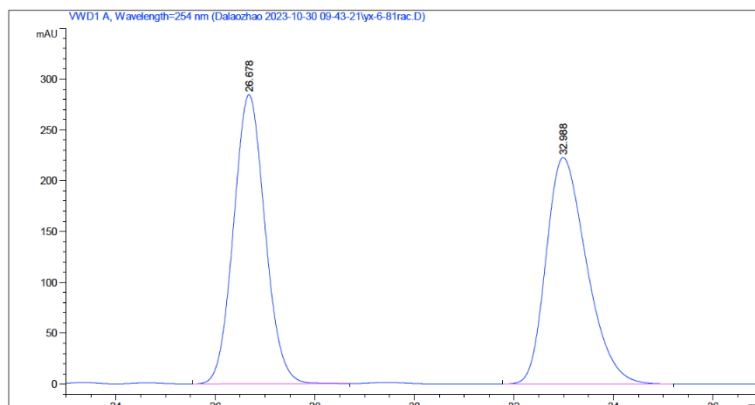

| Peak | RetTime[min] | Type | Width[min] | Area[mAu*s] | Height[mAU] | Area[%] |
|------|--------------|------|------------|-------------|-------------|---------|
| 1    | 26.678       | BB   | 0.6795     | 1.24803e4   | 284.33755   | 49.8446 |
| 2    | 32.988       | BB   | 0.8740     | 1.25581e4   | 222.49393   | 50.1554 |

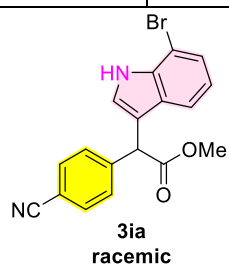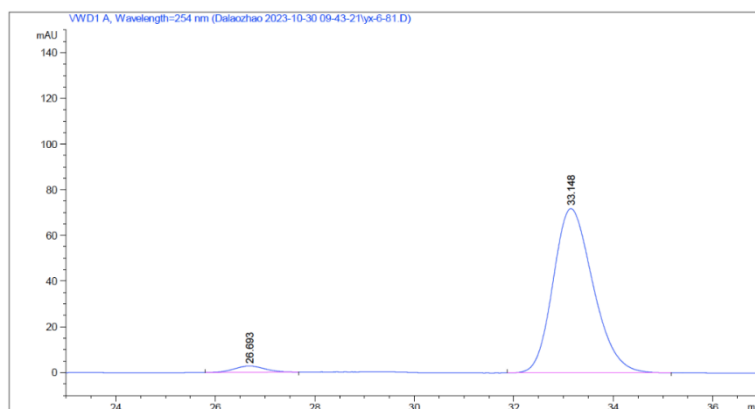

| Peak | RetTime[min] | Type | Width[min] | Area[mAu*s] | Height[mAU] | Area[%] |
|------|--------------|------|------------|-------------|-------------|---------|
| 1    | 26.693       | BB   | 0.5945     | 116.59806   | 2.73736     | 2.8293  |
| 2    | 33.148       | BB   | 0.8642     | 4004.48364  | 71.86063    | 97.1707 |

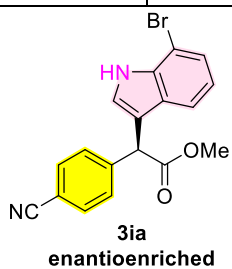

**3ja**, HPLC conditions: Daicel CHIRALPAK® IC column; 10% *i*-PrOH in *n*-hexane; 1.0 mL/min,  $\lambda = 254$  nm.

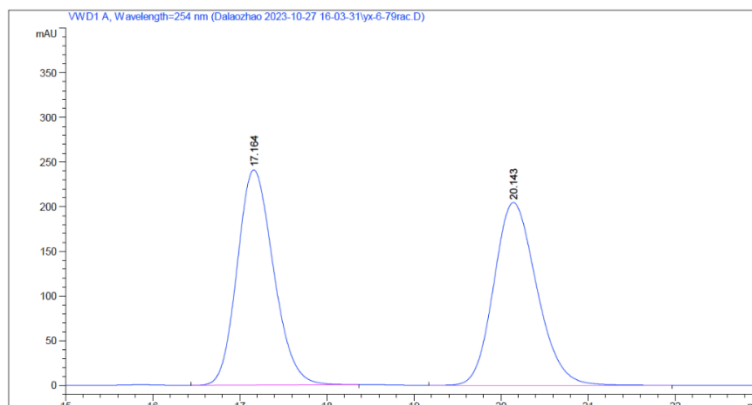

| Peak | RetTime[min] | Type | Width[min] | Area[mAu*s] | Height[mAU] | Area[%] |
|------|--------------|------|------------|-------------|-------------|---------|
| 1    | 17.164       | BB   | 0.4494     | 6968.07715  | 241.00447   | 49.8481 |
| 2    | 20.143       | BB   | 0.5308     | 7010.54980  | 204.59828   | 50.1519 |

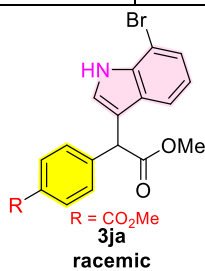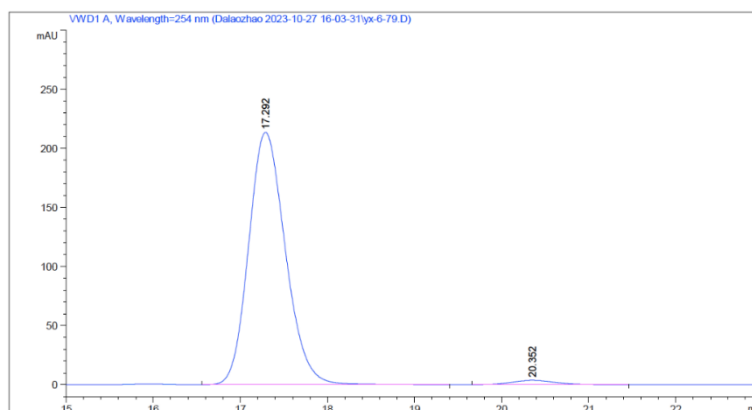

| Peak | RetTime[min] | Type | Width[min] | Area[mAu*s] | Height[mAU] | Area[%] |
|------|--------------|------|------------|-------------|-------------|---------|
| 1    | 17.292       | BB   | 0.4538     | 6254.04980  | 213.52275   | 98.0062 |
| 2    | 20.352       | BB   | 0.5011     | 127.23135   | 3.62556     | 1.9938  |

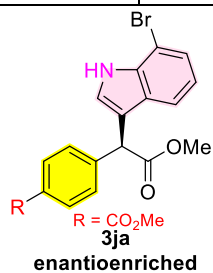



**3ka**, HPLC conditions: Daicel CHIRALPAK® IC column; 15% *i*-PrOH in *n*-hexane; 1.0 mL/min,  $\lambda = 254$  nm.

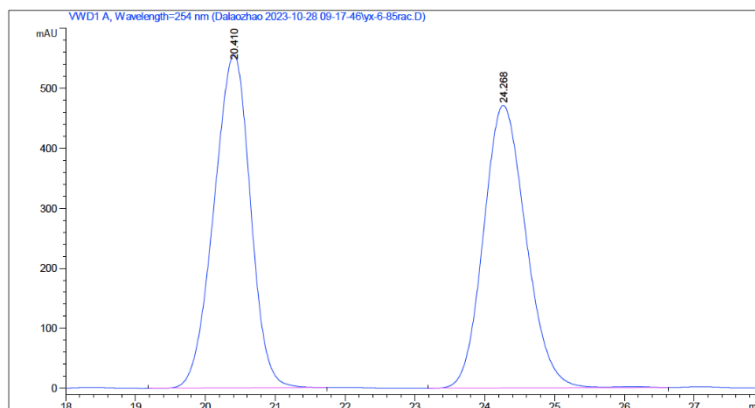

| Peak | RetTime[min] | Type | Width[min] | Area[mAu*s] | Height[mAU] | Area[%] |
|------|--------------|------|------------|-------------|-------------|---------|
| 1    | 20.410       | BB   | 0.5690     | 2.01584e4   | 555.48694   | 50.3390 |
| 2    | 24.268       | BV R | 0.6524     | 1.98869e4   | 471.16019   | 49.6610 |

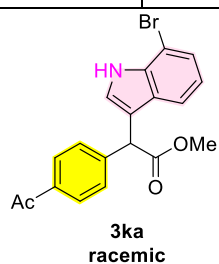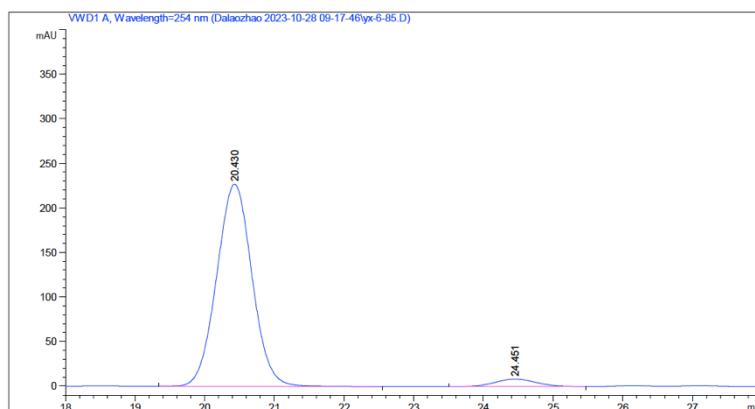

| Peak | RetTime[min] | Type | Width[min] | Area[mAu*s] | Height[mAU] | Area[%] |
|------|--------------|------|------------|-------------|-------------|---------|
| 1    | 20.430       | BB   | 0.5484     | 8004.04199  | 226.88336   | 95.7702 |
| 2    | 24.451       | BB   | 0.6337     | 353.50439   | 8.45010     | 4.2298  |

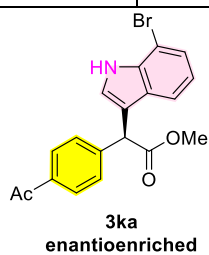

**3la**, HPLC conditions: Daicel CHIRALPAK® AD-H column; 15% *i*-PrOH in *n*-hexane; 1.0 mL/min,  $\lambda = 254$  nm.

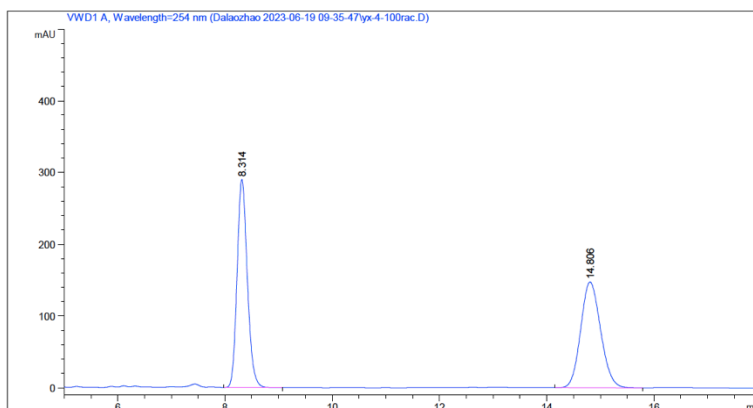

| Peak | RetTime[min] | Type | Width[min] | Area[mAu*s] | Height[mAU] | Area[%] |
|------|--------------|------|------------|-------------|-------------|---------|
| 1    | 8.314        | BB   | 0.2058     | 3851.20508  | 290.11786   | 50.3092 |
| 2    | 14.806       | BB   | 0.4029     | 3803.87231  | 147.42479   | 49.6908 |

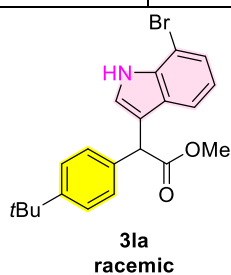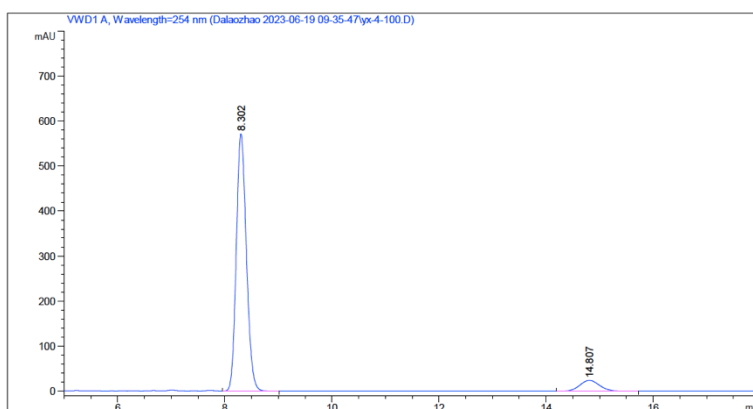

| Peak | RetTime[min] | Type | Width[min] | Area[mAu*s] | Height[mAU] | Area[%] |
|------|--------------|------|------------|-------------|-------------|---------|
| 1    | 8.302        | BB   | 0.2016     | 7450.64990  | 571.51685   | 92.4288 |
| 2    | 14.807       | BB   | 0.3942     | 610.31415   | 24.00618    | 7.5712  |

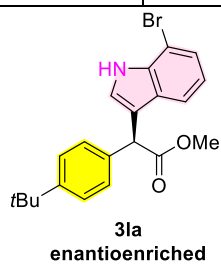

**3ma**, HPLC conditions: Daicel CHIRALPAK® AD-H column; 15% *i*-PrOH in *n*-hexane; 1.0 mL/min,  $\lambda = 254$  nm.

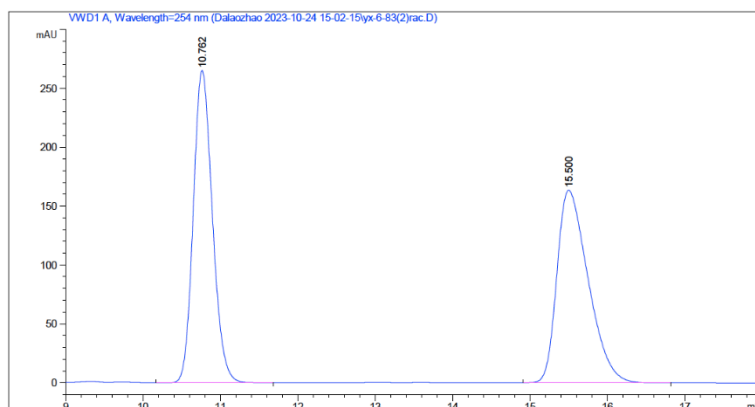

| Peak | RetTime[min] | Type | Width[min] | Area[mAu*s] | Height[mAU] | Area[%] |
|------|--------------|------|------------|-------------|-------------|---------|
| 1    | 10.762       | BB   | 0.2657     | 4549.20996  | 265.13211   | 49.8721 |
| 2    | 15.500       | BB   | 0.4315     | 4572.53613  | 163.31413   | 50.1279 |

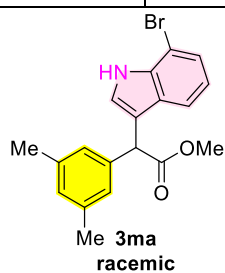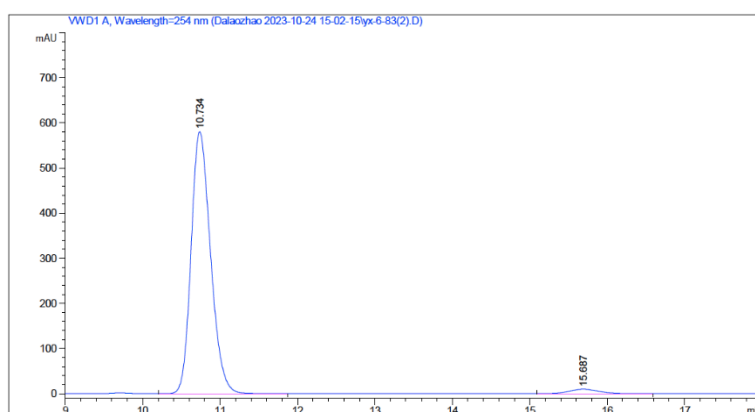

| Peak | RetTime[min] | Type | Width[min] | Area[mAu*s] | Height[mAU] | Area[%] |
|------|--------------|------|------------|-------------|-------------|---------|
| 1    | 10.734       | BB   | 0.2704     | 1.01147e4   | 580.19495   | 97.5473 |
| 2    | 15.687       | BB   | 0.3998     | 254.31642   | 9.72160     | 2.4527  |

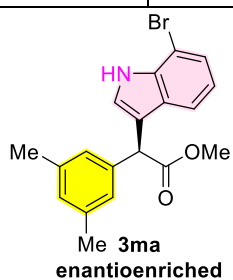

**3na**, HPLC conditions: Daicel CHIRALPAK® IC column; 10% *i*-PrOH in *n*-hexane; 1.0 mL/min,  $\lambda = 254$  nm.

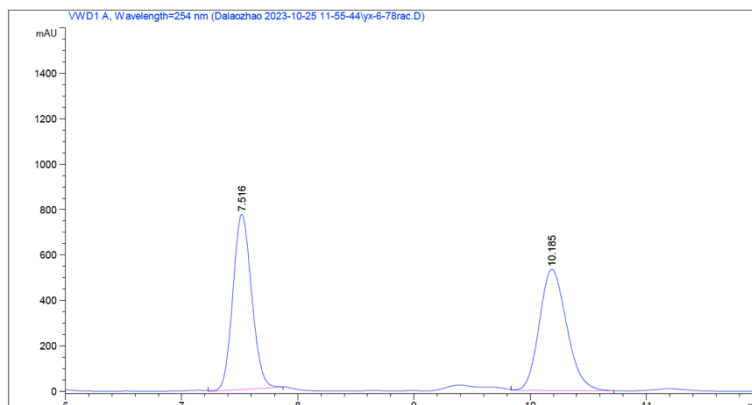

| Peak | RetTime[min] | Type | Width[min] | Area[mAu*s] | Height[mAU] | Area[%] |
|------|--------------|------|------------|-------------|-------------|---------|
| 1    | 7.516        | MM   | 0.1871     | 8659.59082  | 771.22919   | 49.7404 |
| 2    | 10.185       | MM   | 0.2732     | 8749.97754  | 533.81573   | 50.2596 |

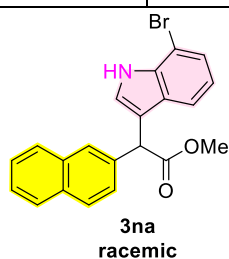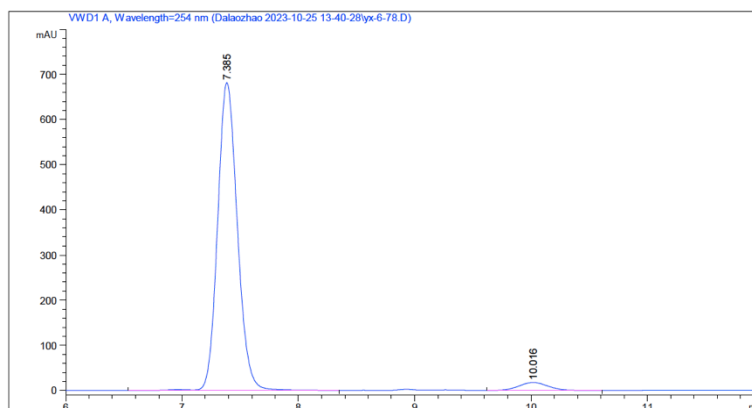

| Peak | RetTime[min] | Type | Width[min] | Area[mAu*s] | Height[mAU] | Area[%] |
|------|--------------|------|------------|-------------|-------------|---------|
| 1    | 7.385        | VB R | 0.1819     | 8014.49219  | 681.64905   | 96.2623 |
| 2    | 10.016       | BB   | 0.2740     | 311.18854   | 17.65883    | 3.7377  |

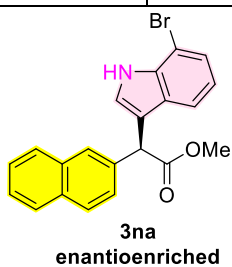

**3oa**, HPLC conditions: Daicel CHIRALPAK® AD-H column; 10% *i*-PrOH in *n*-hexane; 1.0 mL/min,  $\lambda = 254$  nm.

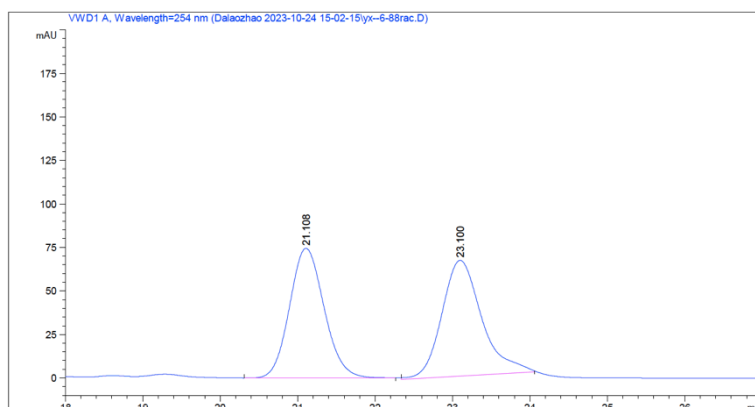

| Peak | RetTime[min] | Type | Width[min] | Area[mAu*s] | Height[mAU] | Area[%] |
|------|--------------|------|------------|-------------|-------------|---------|
| 1    | 21.108       | BB   | 0.4807     | 2307.20679  | 74.49439    | 49.2538 |
| 2    | 23.100       | MM   | 0.5963     | 2377.11621  | 66.43819    | 50.7462 |

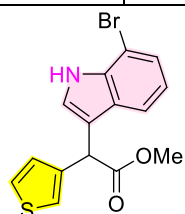

**3oa**  
racemic

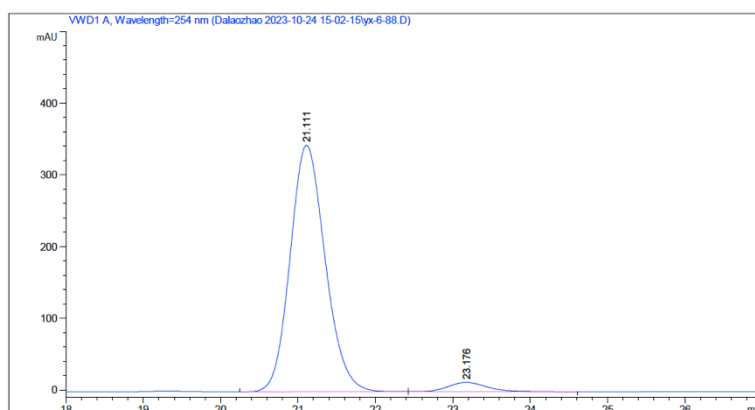

| Peak | RetTime[min] | Type | Width[min] | Area[mAu*s] | Height[mAU] | Area[%] |
|------|--------------|------|------------|-------------|-------------|---------|
| 1    | 21.111       | BB   | 0.4882     | 1.08321e4   | 344.01672   | 95.9764 |
| 2    | 23.176       | BB   | 0.5365     | 454.10968   | 12.92601    | 4.0236  |

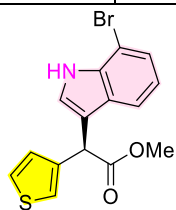

**3oa**  
enantioenriched

**3pa** HPLC conditions: Daicel CHIRALPAK® IC column; 10% *i*-PrOH in *n*-hexane; 1.0 mL/min,  $\lambda = 254$  nm.

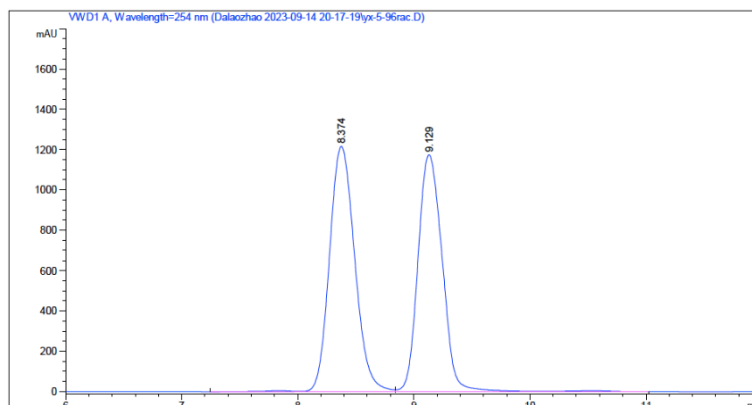

| Peak | RetTime[min] | Type | Width[min] | Area[mAu*s] | Height[mAU] | Area[%] |
|------|--------------|------|------------|-------------|-------------|---------|
| 1    | 8.374        | VV R | 0.2371     | 1.84538e4   | 1216.35229  | 51.8708 |
| 2    | 9.129        | VV R | 0.2401     | 1.71227e4   | 1174.82178  | 48.1292 |

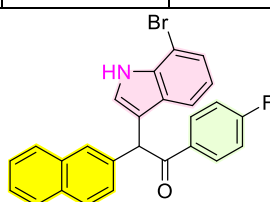

**3pa**  
racemic

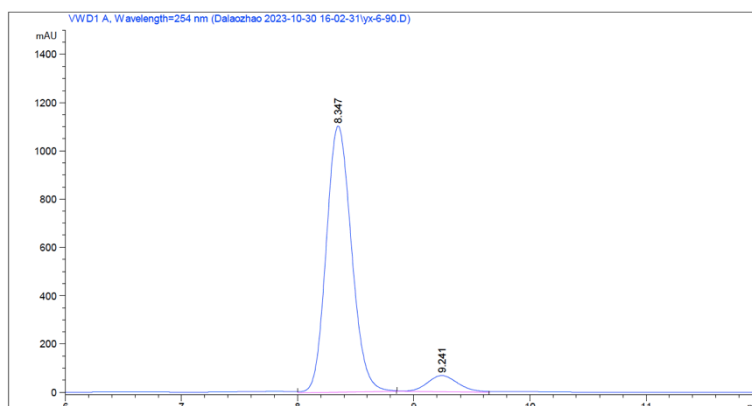

| Peak | RetTime[min] | Type | Width[min] | Area[mAu*s] | Height[mAU] | Area[%] |
|------|--------------|------|------------|-------------|-------------|---------|
| 1    | 8.347        | MM   | 0.2514     | 1.66403e4   | 1103.18835  | 93.1647 |
| 2    | 9.241        | MM   | 0.3053     | 1220.86670  | 66.65044    | 6.8353  |

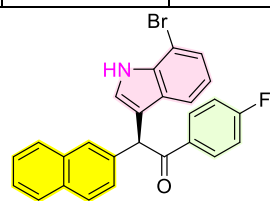

**3pa**  
enantioenriched

**3qa**, HPLC conditions: Daicel CHIRALPAK® IC column; 25% *i*-PrOH in *n*-hexane; 1.0 mL/min,  $\lambda = 254$  nm.

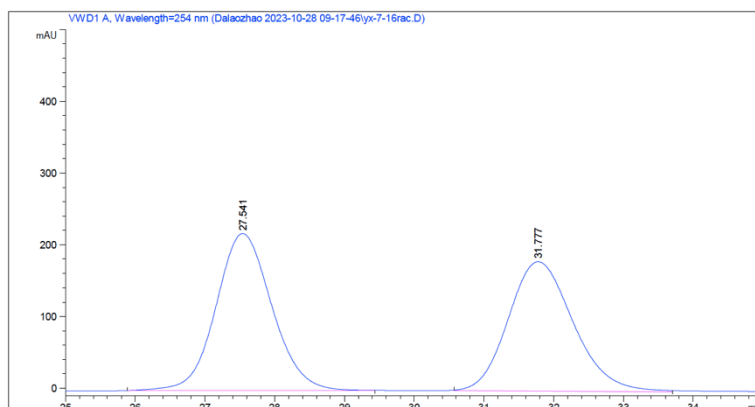

| Peak | RetTime[min] | Type | Width[min] | Area[mAu*s] | Height[mAU] | Area[%] |
|------|--------------|------|------------|-------------|-------------|---------|
| 1    | 27.541       | MM   | 0.9287     | 1.21949e4   | 218.84351   | 51.1606 |
| 2    | 31.777       | MM   | 1.0766     | 1.16416e4   | 180.21367   | 48.8394 |

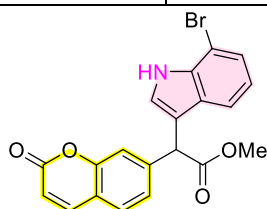

**3qa**  
racemic

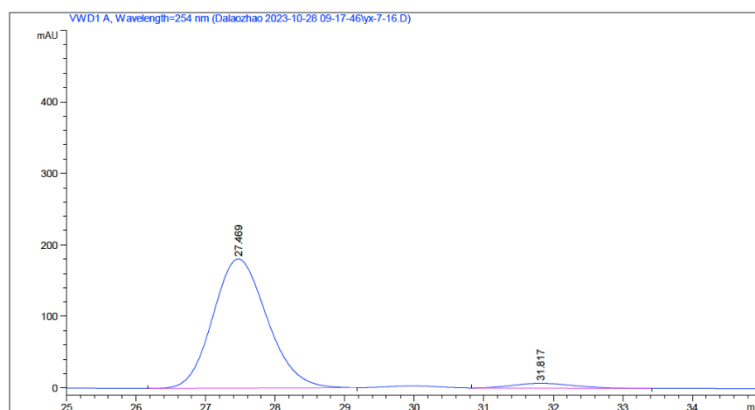

| Peak | RetTime[min] | Type | Width[min] | Area[mAu*s] | Height[mAU] | Area[%] |
|------|--------------|------|------------|-------------|-------------|---------|
| 1    | 27.469       | BB   | 0.8427     | 9770.35059  | 180.47118   | 96.0186 |
| 2    | 31.817       | BB   | 0.8251     | 405.12115   | 6.65651     | 3.9814  |

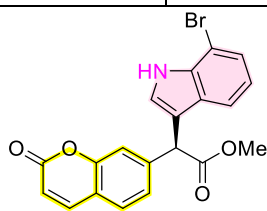

**3qa**  
enantioenriched

**5a**, HPLC conditions: Daicel CHIRALPAK® AD-H column; 5% *i*-PrOH in *n*-hexane; 1.0 mL/min,  $\lambda = 230$  nm.

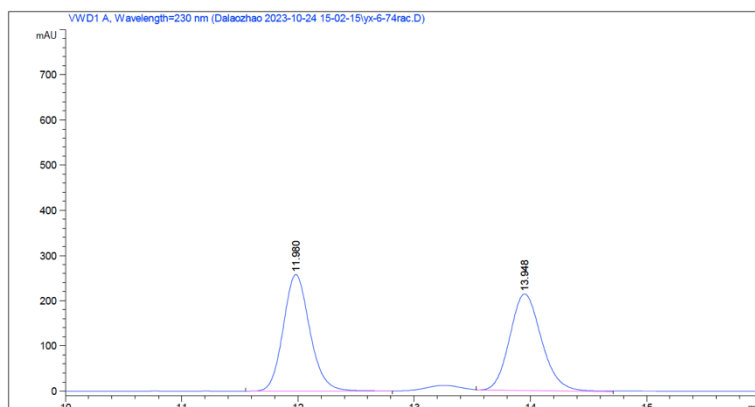

| Peak | RetTime[min] | Type | Width[min] | Area[mAu*s] | Height[mAU] | Area[%] |
|------|--------------|------|------------|-------------|-------------|---------|
| 1    | 11.980       | BV   | 0.2453     | 4101.82715  | 257.90054   | 50.3258 |
| 2    | 13.948       | MM   | 0.3158     | 4048.71338  | 213.66832   | 49.6742 |

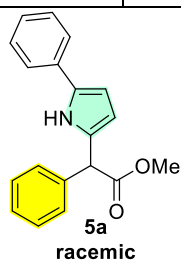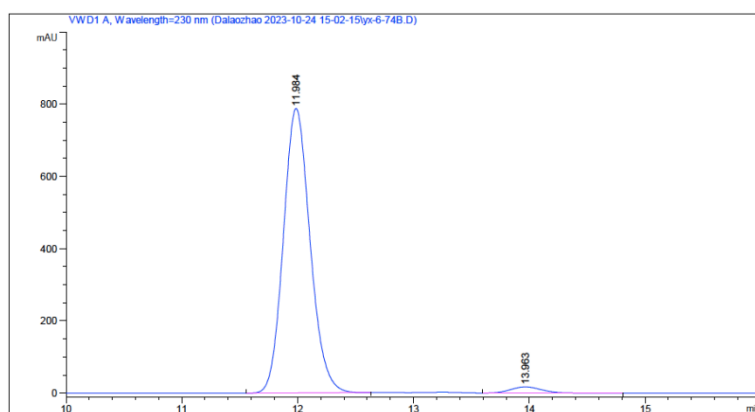

| Peak | RetTime[min] | Type | Width[min] | Area[mAu*s] | Height[mAU] | Area[%] |
|------|--------------|------|------------|-------------|-------------|---------|
| 1    | 11.984       | BB   | 0.2464     | 1.26049e4   | 787.72449   | 97.5269 |
| 2    | 13.963       | BB   | 0.2877     | 319.64203   | 17.11760    | 2.4731  |

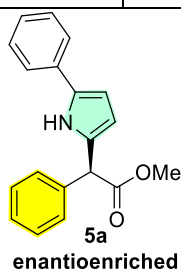



**5b**, HPLC conditions: Daicel CHIRALPAK® AD-H column; 5% *i*-PrOH in *n*-hexane; 1.0 mL/min,  $\lambda = 230$  nm.

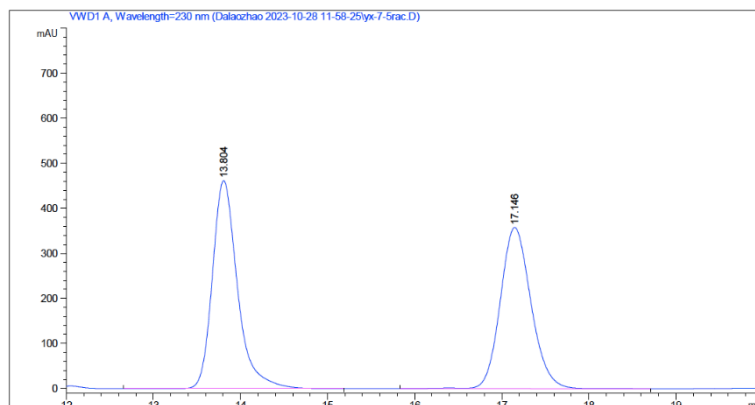

| Peak | RetTime[min] | Type | Width[min] | Area[mAu*s] | Height[mAU] | Area[%] |
|------|--------------|------|------------|-------------|-------------|---------|
| 1    | 13.804       | VB R | 0.3045     | 9224.24707  | 461.63501   | 51.3050 |
| 2    | 17.146       | VB R | 0.3774     | 8754.99219  | 357.60785   | 48.6950 |

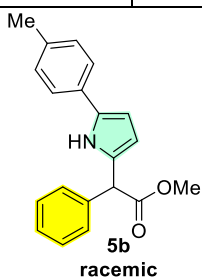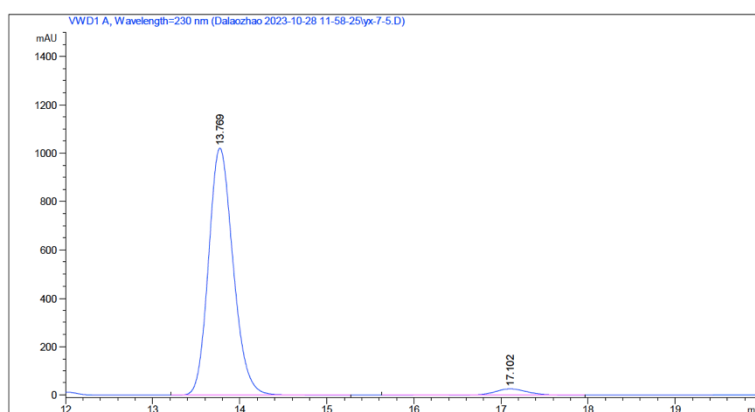

| Peak | RetTime[min] | Type | Width[min] | Area[mAu*s] | Height[mAU] | Area[%] |
|------|--------------|------|------------|-------------|-------------|---------|
| 1    | 13.769       | BB   | 0.3023     | 1.99722e4   | 1021.66229  | 96.6235 |
| 2    | 17.102       | VB R | 0.4044     | 697.91931   | 25.92346    | 3.3765  |

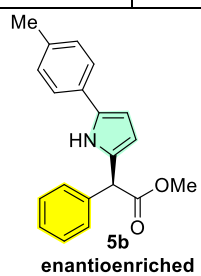

**5c**, HPLC conditions: Daicel CHIRALPAK® AD-H column; 10% *i*-PrOH in *n*-hexane; 1.0 mL/min,  $\lambda = 254$  nm.

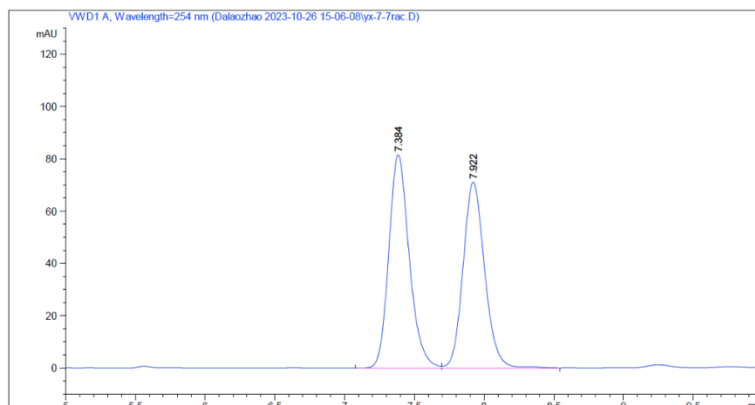

| Peak | RetTime[min] | Type | Width[min] | Area[mAu*s] | Height[mAU] | Area[%] |
|------|--------------|------|------------|-------------|-------------|---------|
| 1    | 7.384        | BV   | 0.1554     | 831.73621   | 81.55822    | 52.1129 |
| 2    | 7.922        | VV R | 0.1648     | 764.29108   | 71.05061    | 47.8871 |

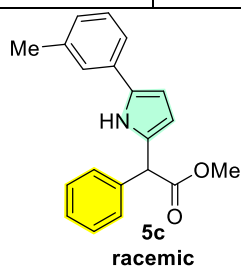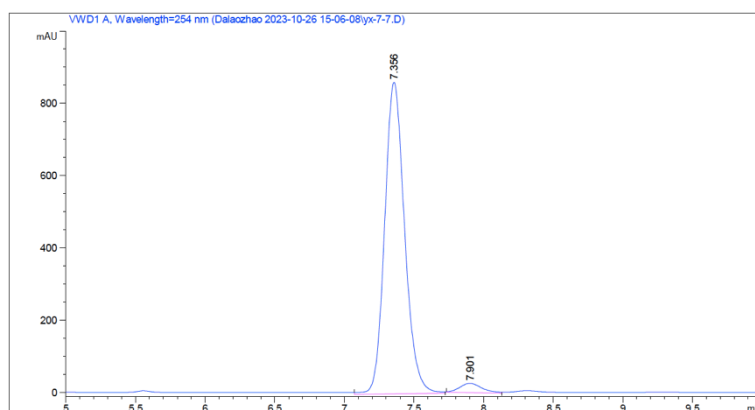

| Peak | RetTime[min] | Type | Width[min] | Area[mAu*s] | Height[mAU] | Area[%] |
|------|--------------|------|------------|-------------|-------------|---------|
| 1    | 7.356        | MM   | 0.1666     | 8616.14941  | 861.86407   | 96.7164 |
| 2    | 7.901        | MM   | 0.1885     | 292.52292   | 25.86859    | 3.2836  |

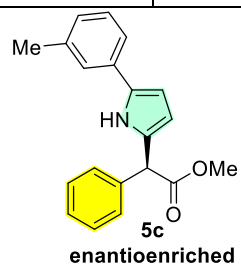

**5d**, HPLC conditions: Daicel CHIRALPAK® AD-H column; 5% *i*-PrOH in *n*-hexane; 1.0 mL/min,  $\lambda = 230$  nm.

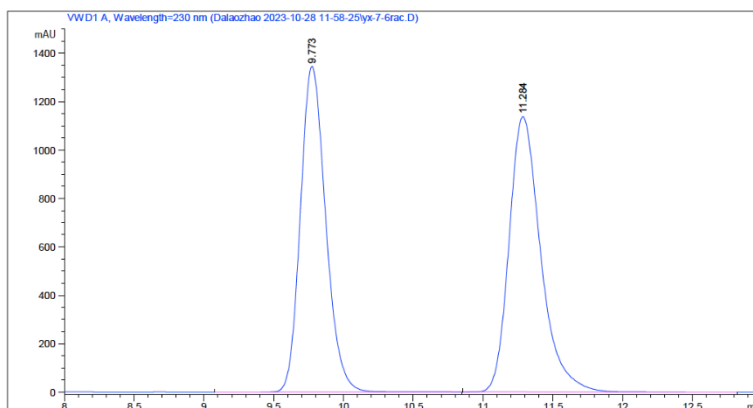

| Peak | RetTime[min] | Type | Width[min] | Area[mAu*s] | Height[mAU] | Area[%] |
|------|--------------|------|------------|-------------|-------------|---------|
| 1    | 9.773        | VB R | 0.1948     | 1.69238e4   | 1345.37915  | 48.5949 |
| 2    | 11.284       | BB   | 0.2403     | 1.79024e4   | 1137.91150  | 51.4051 |

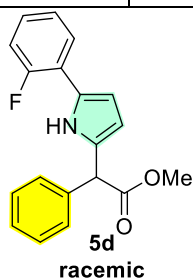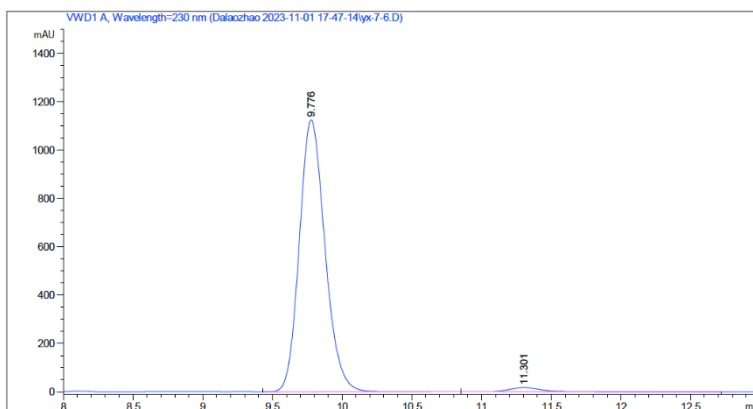

| Peak | RetTime[min] | Type | Width[min] | Area[mAu*s] | Height[mAU] | Area[%] |
|------|--------------|------|------------|-------------|-------------|---------|
| 1    | 9.776        | BB   | 0.1971     | 1.43685e4   | 1124.67297  | 98.0484 |
| 2    | 11.301       | BB   | 0.2466     | 285.99020   | 17.44712    | 1.9516  |

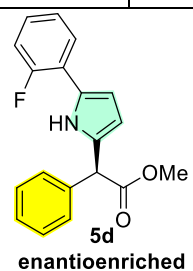

**5e**, HPLC conditions: Daicel CHIRALPAK® IC column; 10% *i*-PrOH in *n*-hexane; 1.0 mL/min,  $\lambda = 254$  nm.

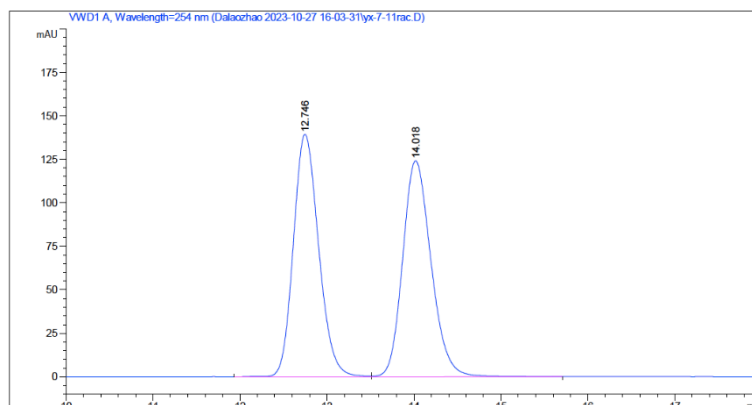

| Peak | RetTime[min] | Type | Width[min] | Area[mAu*s] | Height[mAU] | Area[%] |
|------|--------------|------|------------|-------------|-------------|---------|
| 1    | 12.746       | BV   | 0.3144     | 2817.26099  | 139.42563   | 50.0241 |
| 2    | 14.018       | VB   | 0.3491     | 2814.54272  | 124.06582   | 49.9759 |

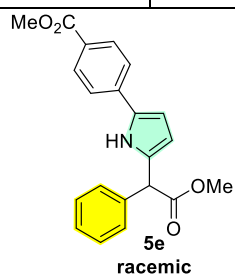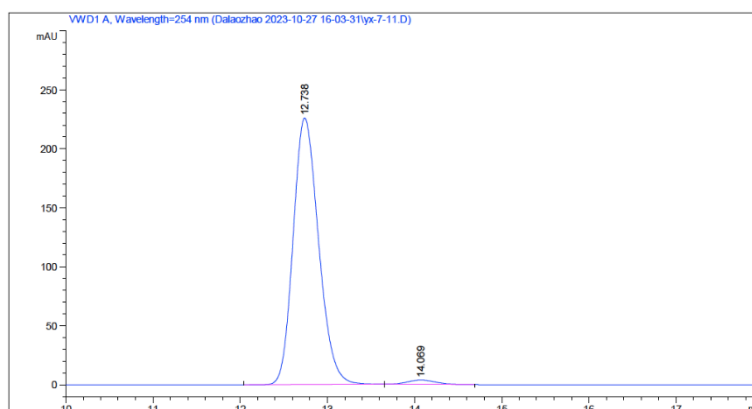

| Peak | RetTime[min] | Type | Width[min] | Area[mAu*s] | Height[mAU] | Area[%] |
|------|--------------|------|------------|-------------|-------------|---------|
| 1    | 12.738       | BB   | 0.3133     | 4571.39844  | 225.89697   | 98.2464 |
| 2    | 14.069       | BB   | 0.3423     | 81.59534    | 3.69189     | 1.7536  |

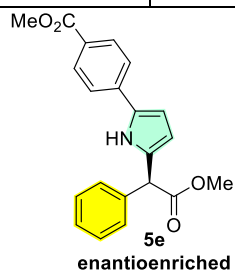

**5f**, HPLC conditions: Daicel CHIRALPAK® IC column; 10% *i*-PrOH in *n*-hexane; 1.0 mL/min,  $\lambda = 254$  nm.

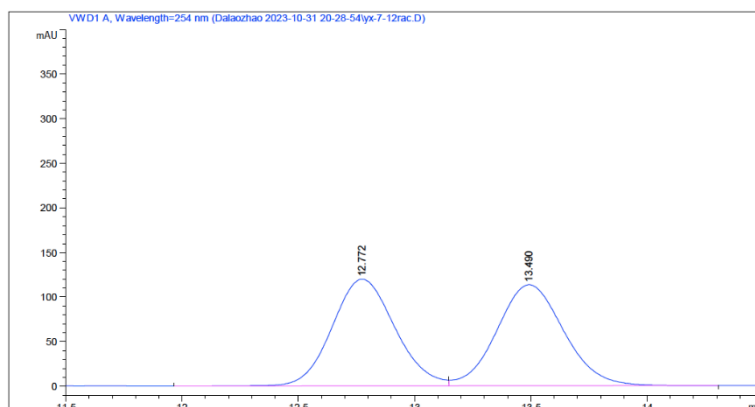

| Peak | RetTime[min] | Type | Width[min] | Area[mAu*s] | Height[mAU] | Area[%] |
|------|--------------|------|------------|-------------|-------------|---------|
| 1    | 12.772       | BV   | 0.2924     | 2253.58765  | 119.71539   | 49.8494 |
| 2    | 13.490       | VB   | 0.3107     | 2267.20776  | 113.24815   | 50.1506 |

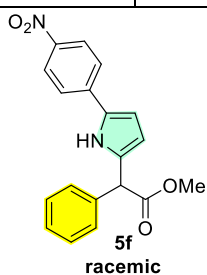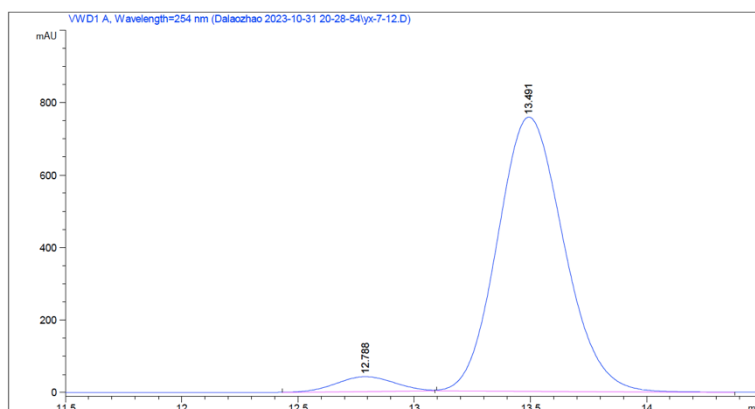

| Peak | RetTime[min] | Type | Width[min] | Area[mAu*s] | Height[mAU] | Area[%] |
|------|--------------|------|------------|-------------|-------------|---------|
| 1    | 12.788       | MM   | 0.2938     | 724.97583   | 41.13110    | 4.6153  |
| 2    | 13.491       | MM   | 0.3297     | 1.49830e4   | 757.39014   | 95.3847 |

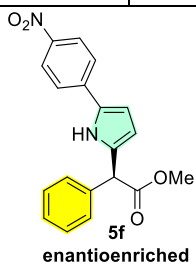

**5g**, HPLC conditions: Daicel CHIRALPAK® AD-H column; 1% *i*-PrOH in *n*-hexane; 1.0 mL/min,  $\lambda = 254$  nm.

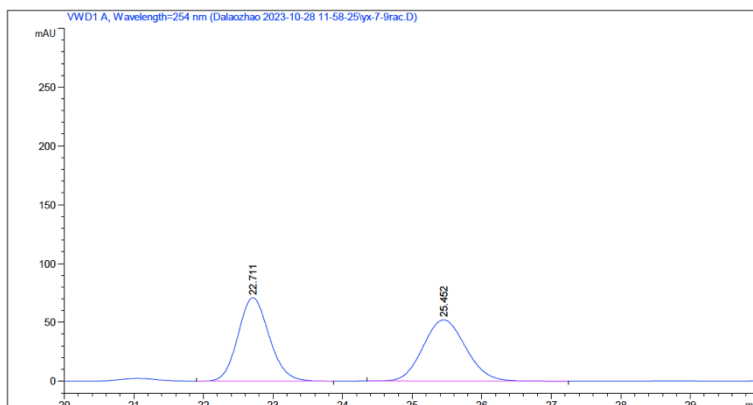

| Peak | RetTime[min] | Type | Width[min] | Area[mAu*s] | Height[mAU] | Area[%] |
|------|--------------|------|------------|-------------|-------------|---------|
| 1    | 22.711       | BB   | 0.4796     | 2205.57910  | 70.85541    | 49.9728 |
| 2    | 25.452       | BB   | 0.6662     | 2207.97998  | 51.95373    | 50.0272 |

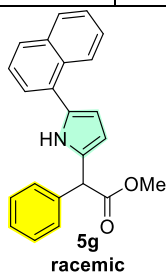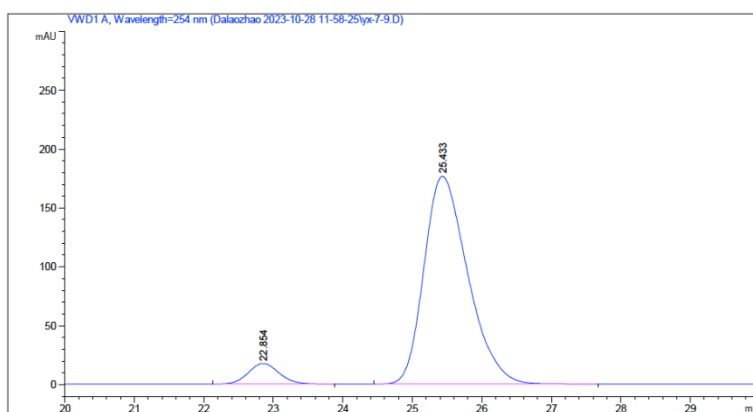

| Peak | RetTime[min] | Type | Width[min] | Area[mAu*s] | Height[mAU] | Area[%] |
|------|--------------|------|------------|-------------|-------------|---------|
| 1    | 22.854       | BB   | 0.4709     | 536.26276   | 17.50987    | 6.5103  |
| 2    | 25.433       | BB   | 0.6726     | 7700.87598  | 176.32184   | 93.4897 |

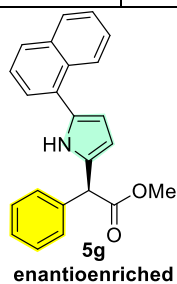

**5h**, HPLC conditions: Daicel CHIRALPAK® AD-H column; 10% *i*-PrOH in *n*-hexane; 1.0 mL/min,  $\lambda = 254$  nm.

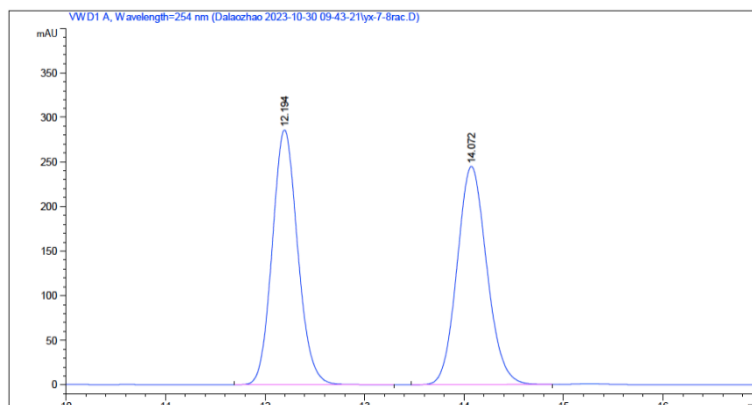

| Peak | RetTime[min] | Type | Width[min] | Area[mAu*s] | Height[mAU] | Area[%] |
|------|--------------|------|------------|-------------|-------------|---------|
| 1    | 12.194       | BB   | 0.2725     | 5069.54541  | 285.70529   | 49.9270 |
| 2    | 14.072       | BB   | 0.3224     | 5084.36816  | 244.74724   | 50.0730 |

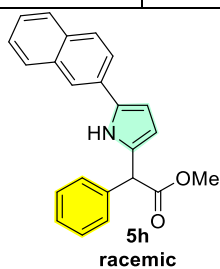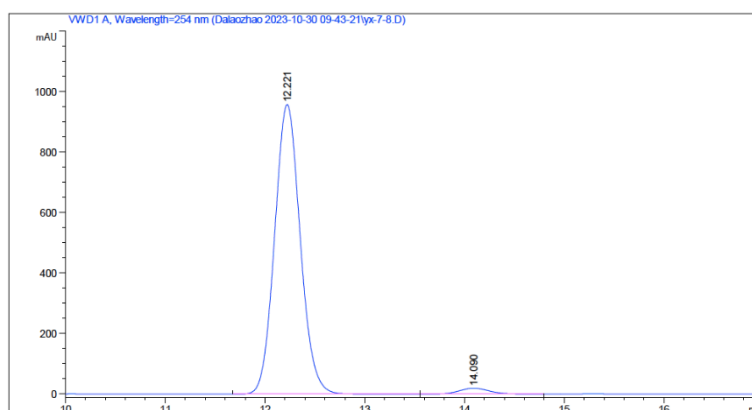

| Peak | RetTime[min] | Type | Width[min] | Area[mAu*s] | Height[mAU] | Area[%] |
|------|--------------|------|------------|-------------|-------------|---------|
| 1    | 12.221       | BB   | 0.2763     | 1.70521e4   | 957.08875   | 97.7194 |
| 2    | 14.090       | BB   | 0.3185     | 397.96979   | 19.24032    | 2.2806  |

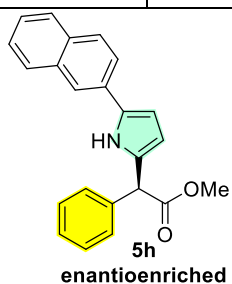

**5i**, HPLC conditions: Daicel CHIRALPAK® IC column; 1% *i*-PrOH in *n*-hexane; 1.0 mL/min,  $\lambda = 254$  nm.

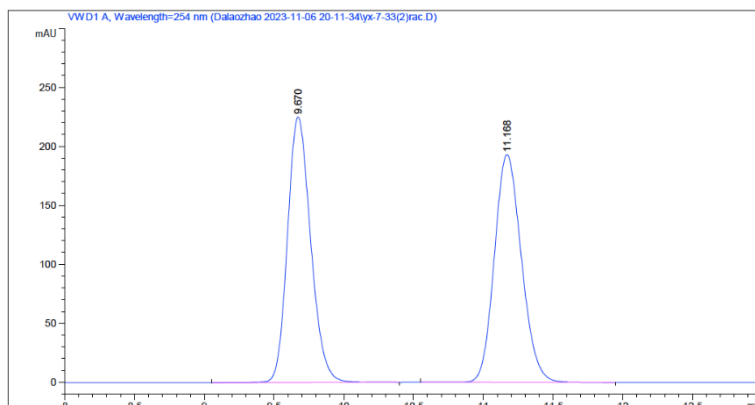

| Peak | RetTime[min] | Type | Width[min] | Area[mAu*s] | Height[mAU] | Area[%] |
|------|--------------|------|------------|-------------|-------------|---------|
| 1    | 9.670        | BB   | 0.1787     | 2604.34277  | 225.04472   | 49.9632 |
| 2    | 11.168       | BB   | 0.2099     | 2608.18164  | 193.17096   | 50.0368 |

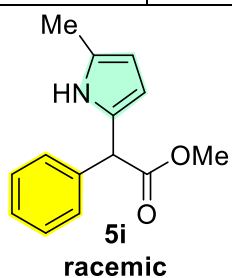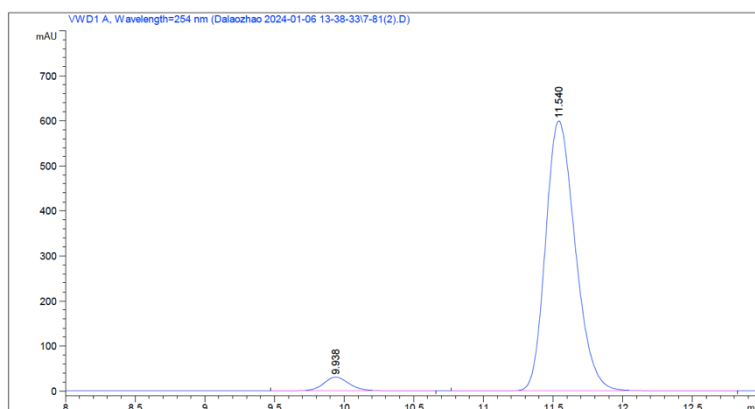

| Peak | RetTime[min] | Type | Width[min] | Area[mAu*s] | Height[mAU] | Area[%] |
|------|--------------|------|------------|-------------|-------------|---------|
| 1    | 9.938        | BB   | 0.1971     | 389.88803   | 30.21919    | 4.2129  |
| 2    | 11.540       | BB   | 0.2294     | 8864.76855  | 599.09741   | 95.7871 |

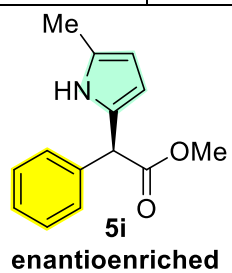



**5j**, HPLC conditions: Daicel CHIRALPAK® IC column; 10% *i*-PrOH in *n*-hexane; 1.0 mL/min,  $\lambda = 254$  nm.

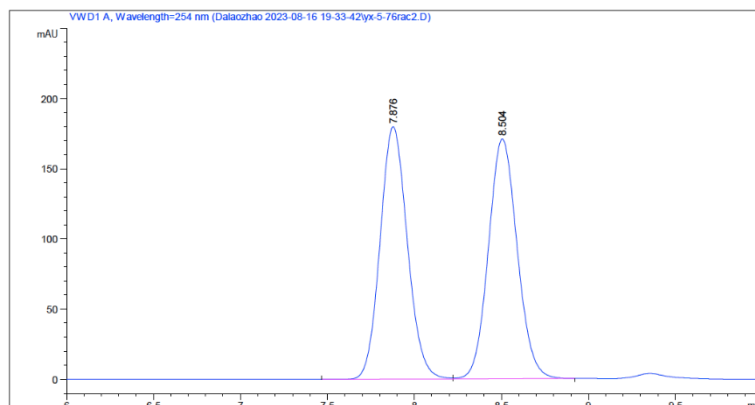

| Peak | RetTime[min] | Type | Width[min] | Area[mAu*s] | Height[mAU] | Area[%] |
|------|--------------|------|------------|-------------|-------------|---------|
| 1    | 7.876        | BV   | 0.1694     | 1961.60168  | 179.88727   | 49.9559 |
| 2    | 8.504        | VB   | 0.1792     | 1965.06750  | 170.99181   | 50.0441 |

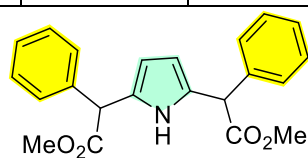

**5j**  
racemic

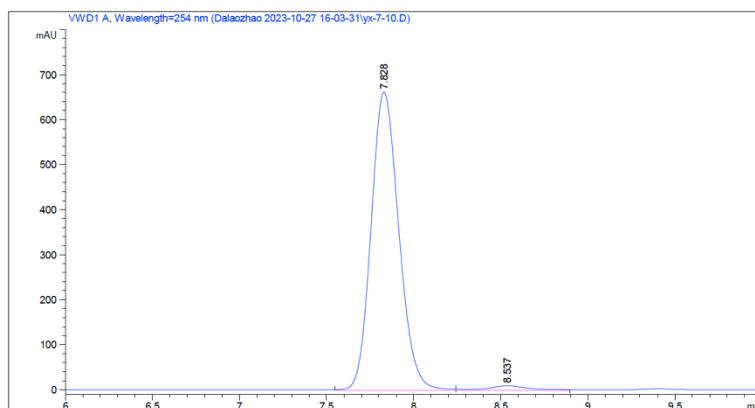

| Peak | RetTime[min] | Type | Width[min] | Area[mAu*s] | Height[mAU] | Area[%] |
|------|--------------|------|------------|-------------|-------------|---------|
| 1    | 7.828        | MM   | 0.1844     | 7334.12744  | 662.76801   | 97.7959 |
| 2    | 8.537        | MM   | 0.2830     | 165.29617   | 9.73454     | 2.2041  |

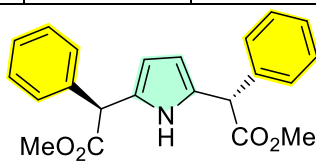

**5j**  
enantioenriched

**5k**, HPLC conditions: Daicel CHIRALPAK® AD-H column; 10% *i*-PrOH in *n*-hexane; 1.0 mL/min,  $\lambda = 254$  nm.

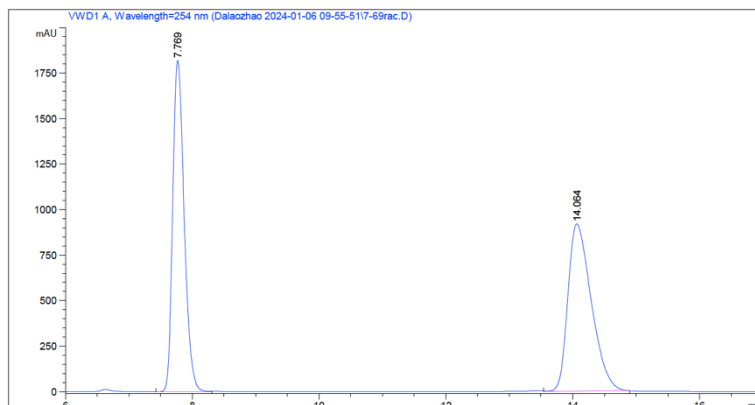

| Peak | RetTime[min] | Type | Width[min] | Area[mAu*s] | Height[mAU] | Area[%] |
|------|--------------|------|------------|-------------|-------------|---------|
| 1    | 7.769        | MM   | 0.2087     | 2.28026e4   | 1820.85608  | 49.2046 |
| 2    | 14.064       | MM   | 0.4268     | 2.35398e4   | 919.19678   | 50.7954 |

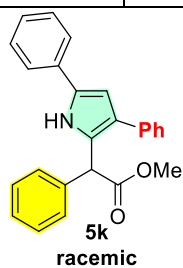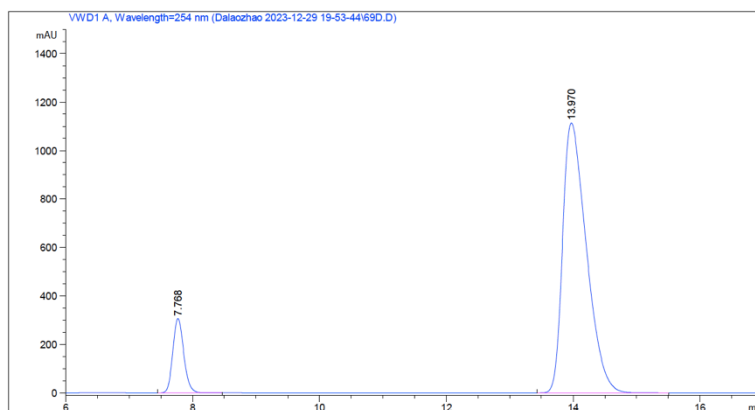

| Peak | RetTime[min] | Type | Width[min] | Area[mAu*s] | Height[mAU] | Area[%] |
|------|--------------|------|------------|-------------|-------------|---------|
| 1    | 7.768        | BB   | 0.1845     | 3659.41284  | 306.42999   | 11.2436 |
| 2    | 13.970       | BB   | 0.3989     | 2.88873e4   | 1113.13196  | 88.7564 |

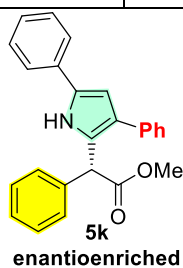

**51**, HPLC conditions: Daicel CHIRALPAK® AD-H column; 10% *i*-PrOH in *n*-hexane; 1.0 mL/min,  $\lambda = 254$  nm.

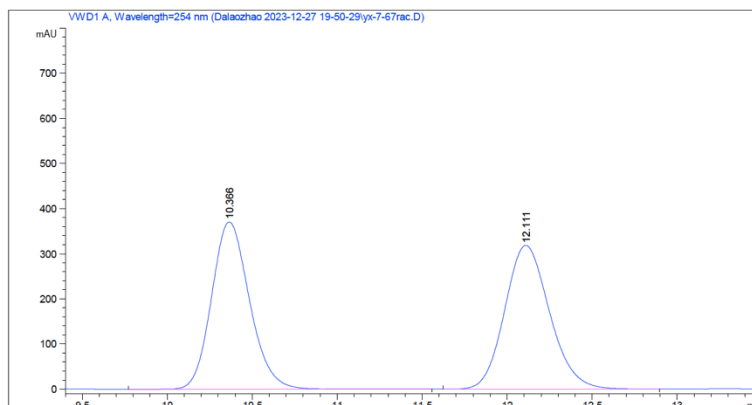

| Peak | RetTime[min] | Type | Width[min] | Area[mAu*s] | Height[mAU] | Area[%] |
|------|--------------|------|------------|-------------|-------------|---------|
| 1    | 10.366       | BB   | 0.2390     | 5743.78174  | 370.79562   | 49.6202 |
| 2    | 12.111       | BB   | 0.2836     | 5831.70020  | 318.36789   | 50.3798 |

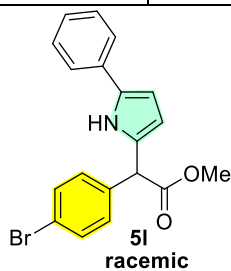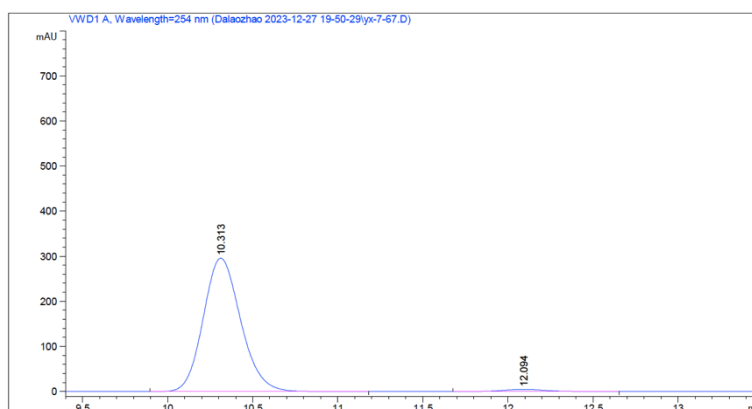

| Peak | RetTime[min] | Type | Width[min] | Area[mAu*s] | Height[mAU] | Area[%] |
|------|--------------|------|------------|-------------|-------------|---------|
| 1    | 10.313       | BB   | 0.2366     | 4524.41455  | 296.02994   | 98.1893 |
| 2    | 12.094       | BB   | 0.2731     | 83.43538    | 4.62413     | 1.8107  |

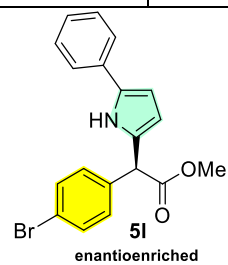

**5m**, HPLC conditions: Daicel CHIRALPAK® AD-H column; 10% *i*-PrOH in *n*-hexane; 1.0 mL/min,  $\lambda = 254$  nm.

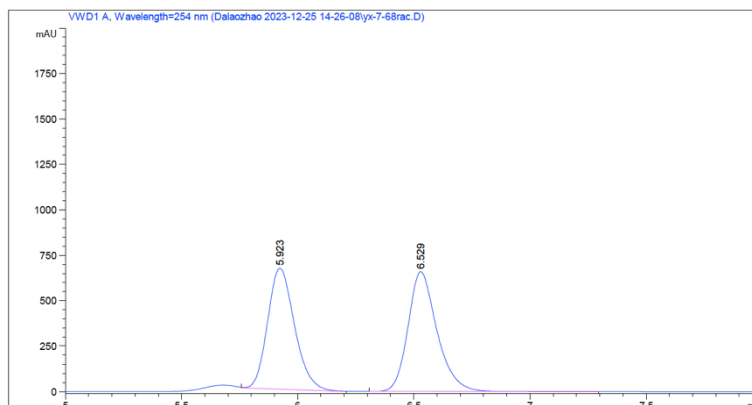

| Peak | RetTime[min] | Type | Width[min] | Area[mAu*s] | Height[mAU] | Area[%] |
|------|--------------|------|------------|-------------|-------------|---------|
| 1    | 5.923        | MM   | 0.1339     | 5349.33936  | 665.79333   | 48.3855 |
| 2    | 6.529        | BB   | 0.1300     | 5706.31934  | 659.67432   | 51.6145 |

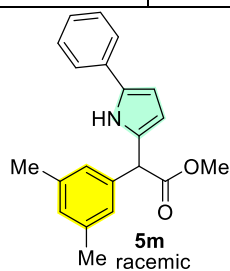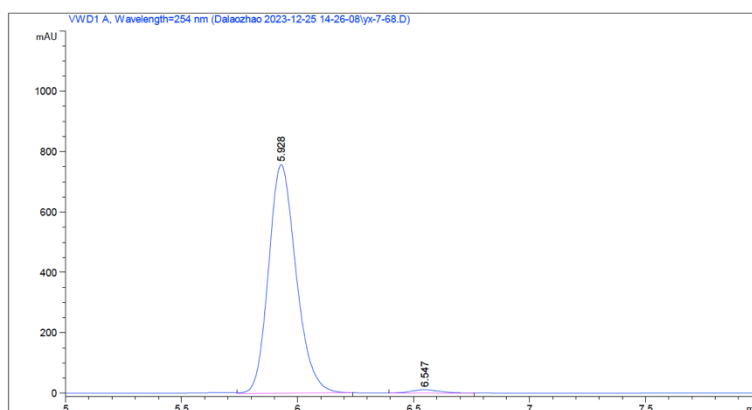

| Peak | RetTime[min] | Type | Width[min] | Area[mAu*s] | Height[mAU] | Area[%] |
|------|--------------|------|------------|-------------|-------------|---------|
| 1    | 5.928        | MM   | 0.1376     | 6253.89258  | 757.50269   | 98.4057 |
| 2    | 6.547        | MM   | 0.1517     | 101.32139   | 11.13322    | 1.5943  |

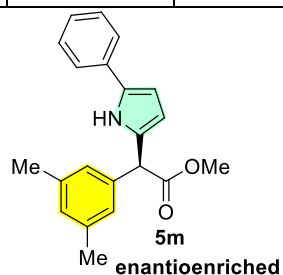

**5n**, HPLC conditions: Daicel CHIRALPAK® AD-H column; 10% *i*-PrOH in *n*-hexane; 1.0 mL/min,  $\lambda = 254$  nm.

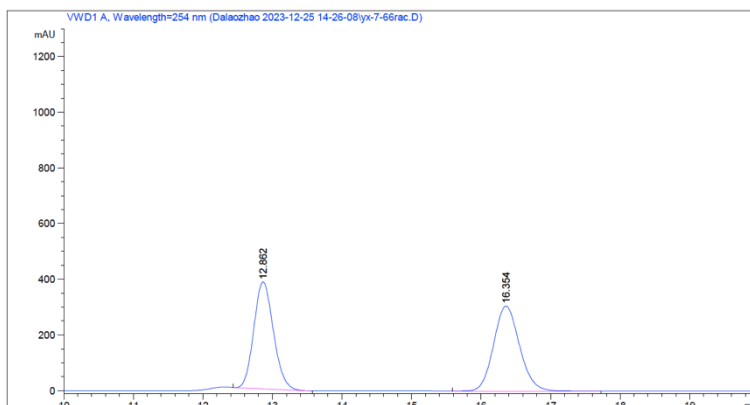

| Peak | RetTime[min] | Type | Width[min] | Area[mAu*s] | Height[mAU] | Area[%] |
|------|--------------|------|------------|-------------|-------------|---------|
| 1    | 12.862       | MM   | 0.3272     | 7546.04785  | 384.33258   | 48.9830 |
| 2    | 16.354       | BB   | 0.4002     | 7859.39697  | 304.46539   | 51.0170 |

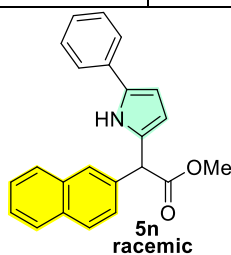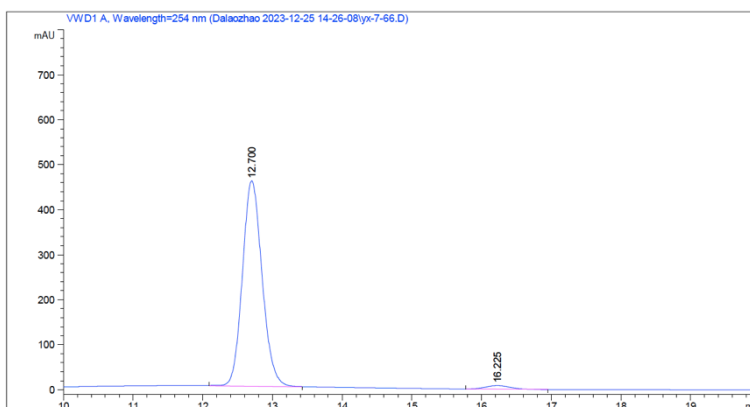

| Peak | RetTime[min] | Type | Width[min] | Area[mAu*s] | Height[mAU] | Area[%] |
|------|--------------|------|------------|-------------|-------------|---------|
| 1    | 12.700       | MM   | 0.3268     | 8954.52148  | 456.68158   | 97.8199 |
| 2    | 16.225       | MM   | 0.4168     | 199.56705   | 7.98092     | 2.1801  |

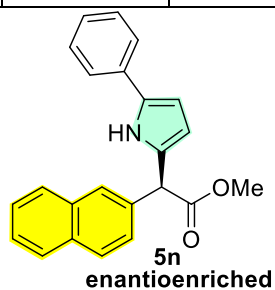

**5o**, HPLC conditions: Daicel CHIRALPAK® AD-H column; 10% *i*-PrOH in *n*-hexane; 1.0 mL/min,  $\lambda = 254$  nm.

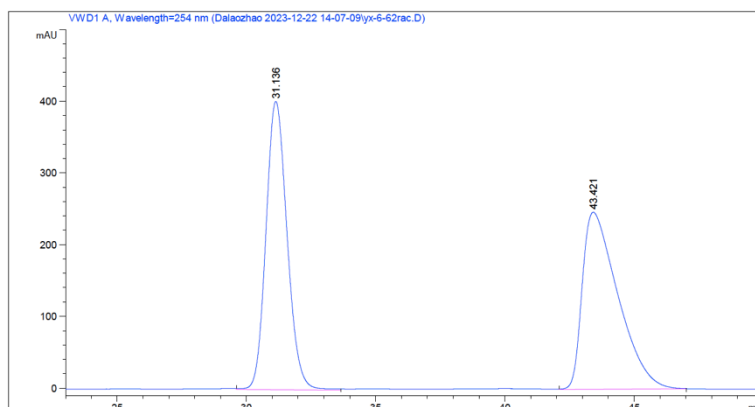

| Peak | RetTime[min] | Type | Width[min] | Area[mAu*s] | Height[mAU] | Area[%] |
|------|--------------|------|------------|-------------|-------------|---------|
| 1    | 31.136       | MM   | 0.9462     | 2.28110e4   | 401.79007   | 49.0546 |
| 2    | 43.421       | MM   | 1.5990     | 2.36902e4   | 246.92311   | 50.9454 |

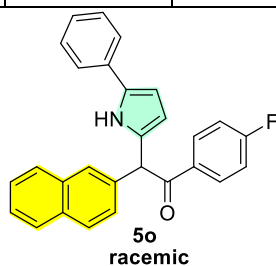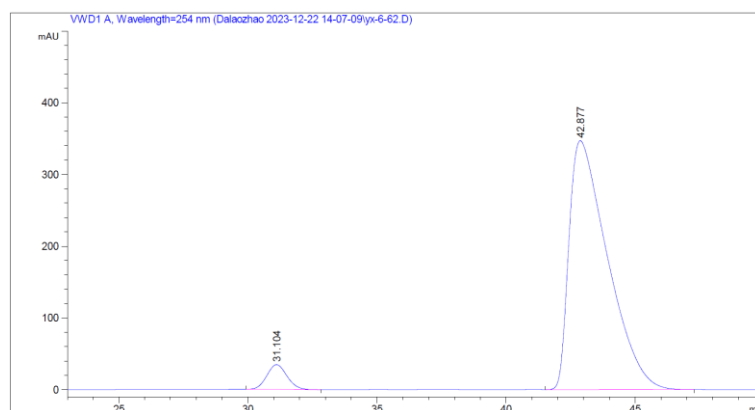

| Peak | RetTime[min] | Type | Width[min] | Area[mAu*s] | Height[mAU] | Area[%] |
|------|--------------|------|------------|-------------|-------------|---------|
| 1    | 31.104       | BB   | 0.8326     | 1863.81421  | 34.42153    | 4.9332  |
| 2    | 42.877       | BB   | 1.5297     | 3.59170e4   | 346.89438   | 95.0668 |

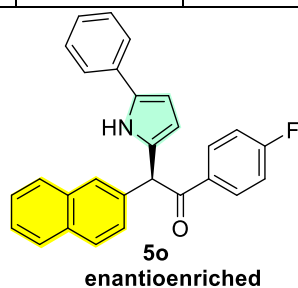

6, HPLC conditions: Daicel CHIRALPAK® AD-H column; 10% *i*-PrOH in *n*-hexane; 1.0 mL/min,  $\lambda = 254$  nm.

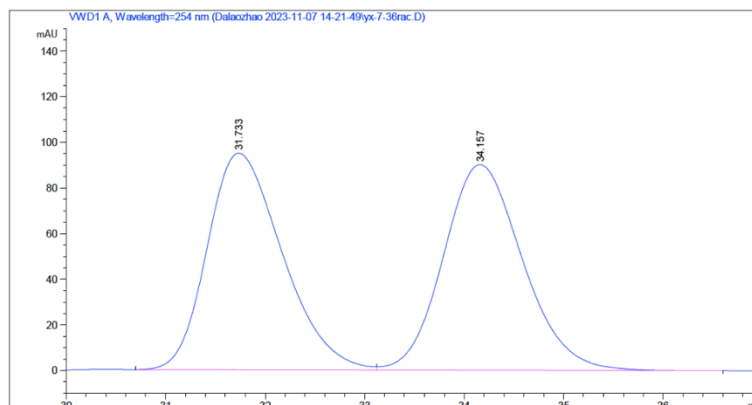

| Peak | RetTime[min] | Type | Width[min] | Area[mAu*s] | Height[mAU] | Area[%] |
|------|--------------|------|------------|-------------|-------------|---------|
| 1    | 31.733       | BV   | 0.8039     | 4974.74268  | 94.88175    | 49.9589 |
| 2    | 34.157       | VB   | 0.8460     | 4982.93604  | 90.12096    | 50.0411 |

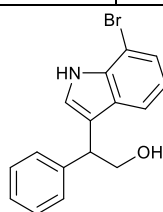

**6**  
racemic

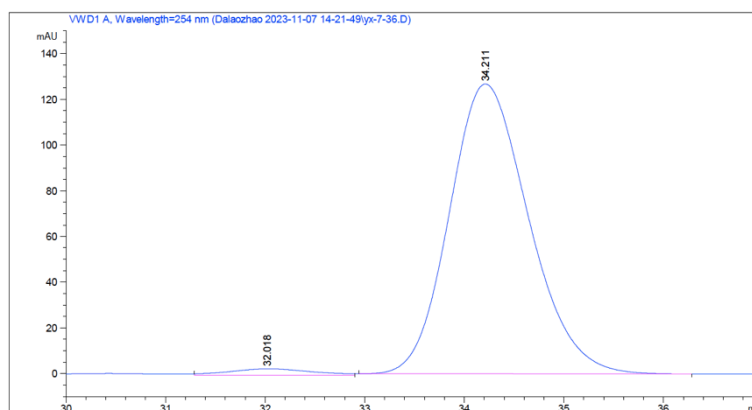

| Peak | RetTime[min] | Type | Width[min] | Area[mAu*s] | Height[mAU] | Area[%] |
|------|--------------|------|------------|-------------|-------------|---------|
| 1    | 32.018       | MM   | 0.9106     | 142.02074   | 2.59949     | 1.9868  |
| 2    | 34.211       | BB   | 0.8561     | 7006.22852  | 126.73658   | 98.0132 |

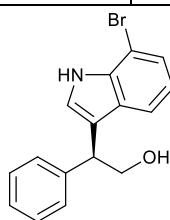

**6**  
enantioenriched

7, HPLC conditions: Daicel CHIRALPAK® AD-H column; 10% *i*-PrOH in *n*-hexane; 1.0 mL/min,  $\lambda = 254$  nm.

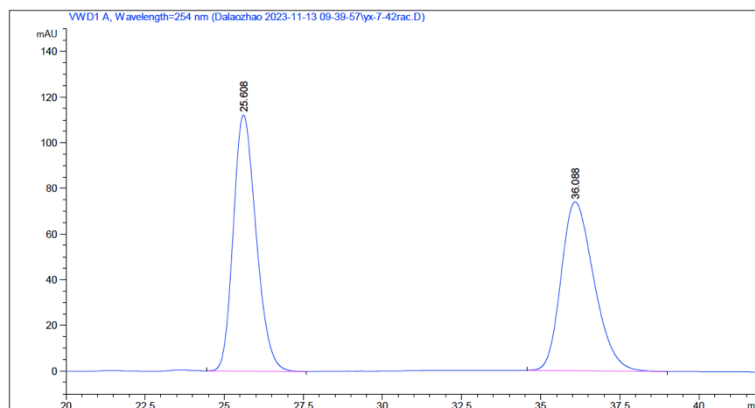

| Peak | RetTime[min] | Type | Width[min] | Area[mAu*s] | Height[mAU] | Area[%] |
|------|--------------|------|------------|-------------|-------------|---------|
| 1    | 25.608       | BB   | 0.7810     | 5619.25879  | 112.16592   | 51.2889 |
| 2    | 36.088       | BB   | 1.1112     | 5336.83984  | 73.96053    | 48.7111 |

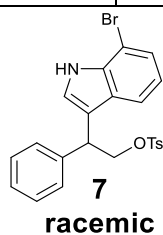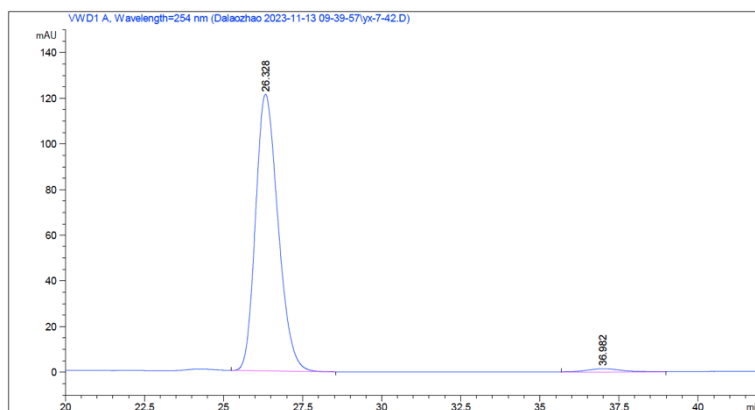

| Peak | RetTime[min] | Type | Width[min] | Area[mAu*s] | Height[mAU] | Area[%] |
|------|--------------|------|------------|-------------|-------------|---------|
| 1    | 26.328       | BB   | 0.7686     | 5984.24268  | 121.11806   | 97.8025 |
| 2    | 36.982       | MM   | 1.4557     | 134.45738   | 1.53943     | 2.1975  |

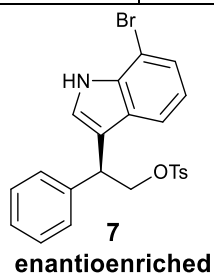



**8A**, HPLC conditions: Daicel CHIRALPAK® AS-H column; 5% *i*-PrOH in *n*-hexane; 1.0 mL/min,  $\lambda = 230$  nm.

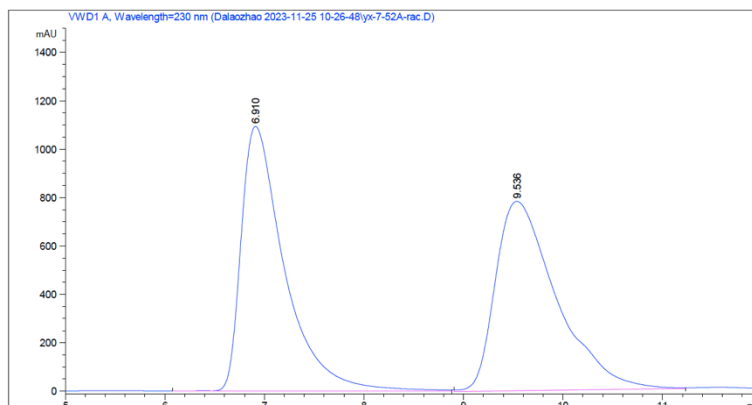

| Peak | RetTime[min] | Type | Width[min] | Area[mAu*s] | Height[mAU] | Area[%] |
|------|--------------|------|------------|-------------|-------------|---------|
| 1    | 6.910        | VV R | 0.4492     | 3.29429e4   | 1093.06238  | 49.6496 |
| 2    | 9.536        | MM   | 0.7109     | 3.34079e4   | 783.18402   | 50.3504 |

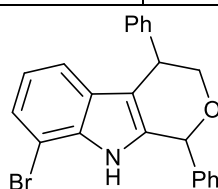

**8A**  
racemic

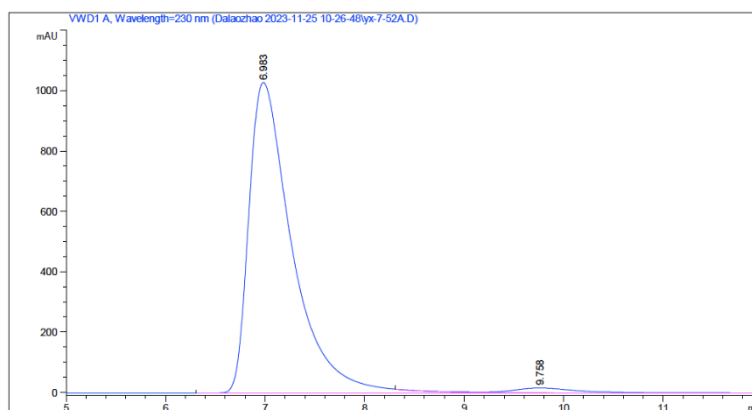

| Peak | RetTime[min] | Type | Width[min] | Area[mAu*s] | Height[mAU] | Area[%] |
|------|--------------|------|------------|-------------|-------------|---------|
| 1    | 6.983        | VV R | 0.4508     | 3.11486e4   | 1028.71729  | 97.5085 |
| 2    | 9.758        | VB E | 0.7052     | 795.88928   | 16.17228    | 2.4915  |

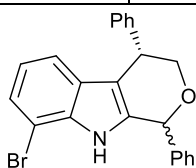

**8A**  
enantiomerically enriched

**8B**, HPLC conditions: Daicel CHIRALPAK® AS-H column; 5% *i*-PrOH in *n*-hexane; 1.0 mL/min,  $\lambda = 230$  nm.

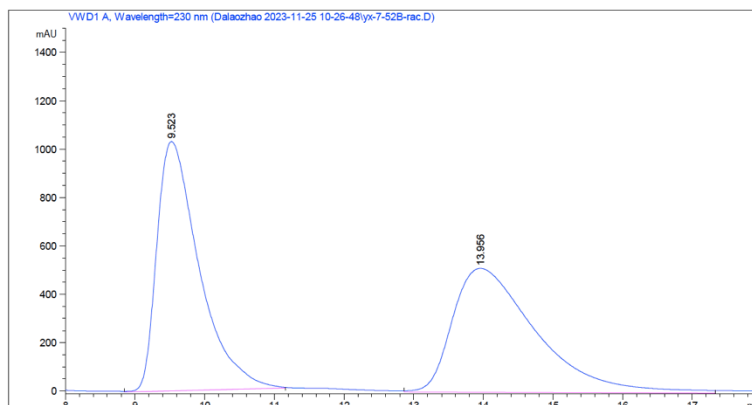

| Peak | RetTime[min] | Type | Width[min] | Area[mAu*s] | Height[mAU] | Area[%] |
|------|--------------|------|------------|-------------|-------------|---------|
| 1    | 9.523        | MM   | 0.7035     | 4.35056e4   | 1030.74377  | 50.4937 |
| 2    | 13.956       | MM   | 1.3877     | 4.26548e4   | 512.29272   | 49.5063 |

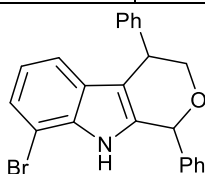

**8B**  
racemic

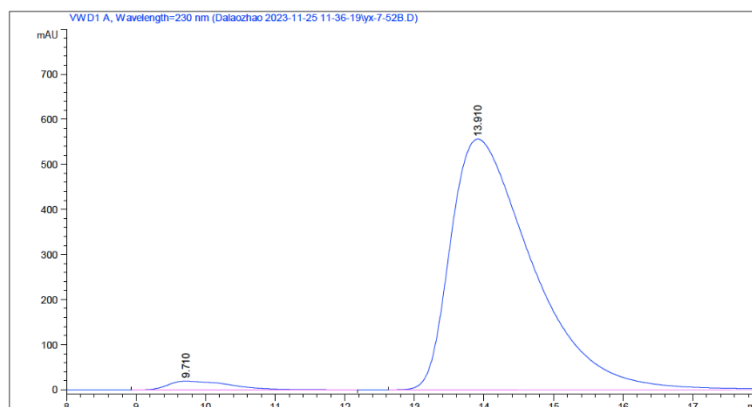

| Peak | RetTime[min] | Type | Width[min] | Area[mAu*s] | Height[mAU] | Area[%] |
|------|--------------|------|------------|-------------|-------------|---------|
| 1    | 9.710        | BB   | 0.8192     | 1202.04504  | 19.55051    | 2.5799  |
| 2    | 13.910       | BB   | 1.2156     | 4.53900e4   | 556.22821   | 97.4201 |

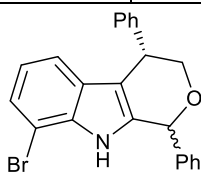

**8B**  
enantioenriched

**9**, HPLC conditions: Daicel CHIRALPAK® AD-H column; 15% *i*-PrOH in *n*-hexane; 1.0 mL/min,  $\lambda = 254$  nm.

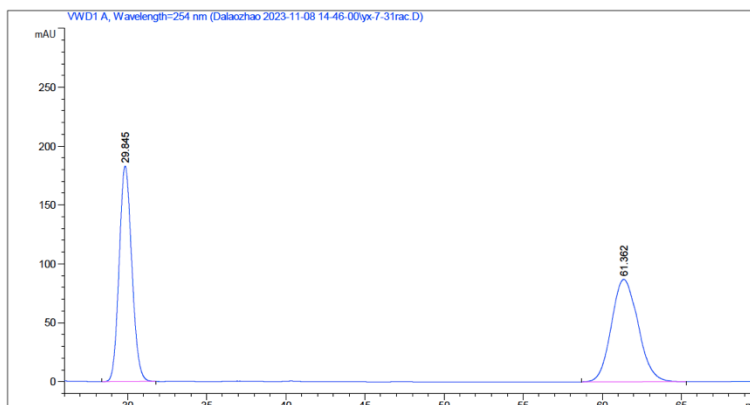

| Peak | RetTime[min] | Type | Width[min] | Area[mAu*s] | Height[mAU] | Area[%] |
|------|--------------|------|------------|-------------|-------------|---------|
| 1    | 29.845       | BB   | 0.8633     | 1.01628e4   | 183.02049   | 49.9264 |
| 2    | 61.362       | BB   | 1.6750     | 1.01927e4   | 86.84803    | 50.0736 |

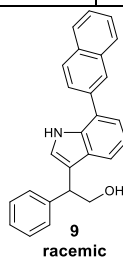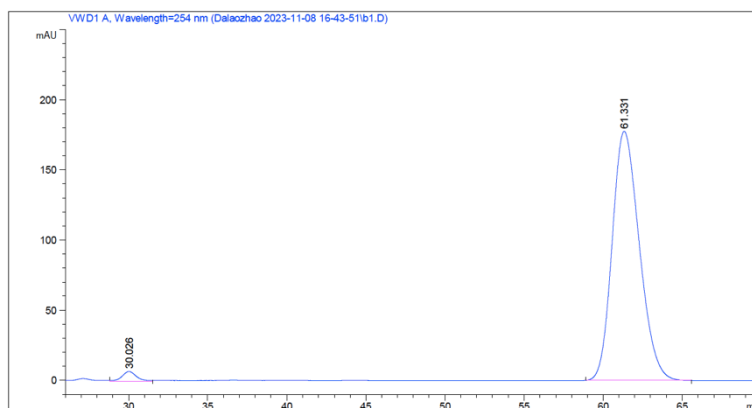

| Peak | RetTime[min] | Type | Width[min] | Area[mAu*s] | Height[mAU] | Area[%] |
|------|--------------|------|------------|-------------|-------------|---------|
| 1    | 30.026       | MM   | 1.0901     | 461.42273   | 7.05464     | 2.1323  |
| 2    | 61.331       | BB   | 1.7707     | 2.11778e4   | 177.48291   | 97.8677 |

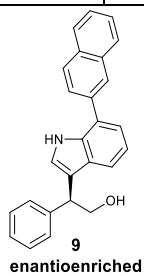

Supplement: d4qo00753k1.pdf [file d4qo00753k1.pdf]
